# Supplementary material for: Application of the whole-transcriptome shotgun sequencing approach to the study of Philadelphia-positive acute lymphoblastic leukemia
Source: PubMed Central journal article supplement — Blood Cancer J. 2012 Mar 9;2(3):e61–. doi: 10.1038/bcj.2012.6 (PMC3317525; doi:10.1038/bcj.2012.6), 2012-03-09
Supplement: bcj20126x11.pdf [file bcj20126x11.pdf]

## Supplemental Data 2

### Primary ALL

| Gene ID  | Transcript length (kb) | RPKM  |
|----------|------------------------|-------|
| 15E1.2   | 0.411                  | 3.85  |
| 3.8-1    | 3.537                  | 0.2   |
| 3.8-1.2  | 0.456                  | 0     |
| 3.8-1.3  | 1.166                  | 0     |
| 3.8-1.4  | 1.169                  | 0     |
| 3.8-1.5  | 3.517                  | 0     |
| 5-HT3c2  | 23.774                 | 0     |
| 76P      | 3.087                  | 0.93  |
| 7A5      | 6.372                  | 0     |
| A1BG     | 3.386                  | 1.75  |
| A2BP1    | 6.388                  | 0     |
| A2M      | 4.653                  | 4.04  |
| A2ML1    | 5.123                  | 0     |
| A2MP     | 2.707                  | 1.64  |
| A3GALT2  | 1.023                  | 0.1   |
| A4GALT   | 2.092                  | 0.14  |
| A4GNT    | 1.243                  | 0     |
| AAA1     | 4.13                   | 0     |
| AAAS     | 1.799                  | 6.38  |
| AACP     | 1.969                  | 0     |
| AACS     | 3.234                  | 3.21  |
| AADAC    | 1.606                  | 0     |
| AADACL1  | 4.289                  | 0.09  |
| AADACL2  | 1.485                  | 0     |
| AADACL3  | 1.266                  | 0     |
| AADACL4  | 1.575                  | 0     |
| AADAT    | 2.45                   | 0     |
| AAK1     | 3.228                  | 6.47  |
| AAMP     | 1.792                  | 13.47 |
| AANAT    | 1.005                  | 0.29  |
| AARS     | 3.344                  | 3.05  |
| AARS2    | 4.073                  | 1.95  |
| AARSD1   | 1.79                   | 7.3   |
| AASDH    | 3.562                  | 0.89  |
| AASDHPPT | 2.861                  | 3.32  |
| AASS     | 6.466                  | 2.86  |
| AATF     | 2.141                  | 8.04  |
| AATK     | 5.843                  | 0.19  |
| ABAT     | 4.871                  | 0.69  |
| ABBA-1   | 4.977                  | 77.69 |
| ABC1     | 3.924                  | 2.85  |
| ABCA1    | 10.412                 | 11.07 |
| ABCA10   | 6.33                   | 0     |
| ABCA11   | 50.692                 | 0.71  |
| ABCA12   | 9.366                  | 0     |

|         |        |       |
|---------|--------|-------|
| ABCA13  | 34.093 | 0.02  |
| ABCA2   | 8.36   | 5.41  |
| ABCA3   | 6.467  | 0.09  |
| ABCA4   | 7.3    | 0.27  |
| ABCA5   | 7.147  | 0.03  |
| ABCA6   | 5.296  | 0     |
| ABCA7   | 6.869  | 1.4   |
| ABCA8   | 5.721  | 0.02  |
| ABCA9   | 6.301  | 1.2   |
| ABCB1   | 9.744  | 0.21  |
| ABCB10  | 3.856  | 1.28  |
| ABCB10P | 0.453  | 0     |
| ABCB11  | 4.775  | 0     |
| ABCB4   | 11.926 | 0.47  |
| ABCB5   | 5.812  | 0.04  |
| ABCB6   | 2.972  | 0.4   |
| ABCB7   | 2.387  | 10.52 |
| ABCB8   | 4.878  | 1.93  |
| ABCB9   | 6.199  | 0.36  |
| ABCC1   | 7.423  | 8.1   |
| ABCC10  | 5.088  | 1.18  |
| ABCC11  | 4.926  | 0     |
| ABCC12  | 5.168  | 0     |
| ABCC13  | 34.516 | 0     |
| ABCC2   | 4.862  | 0.22  |
| ABCC3   | 5.156  | 0.05  |
| ABCC4   | 5.833  | 1.17  |
| ABCC5   | 7.062  | 1.32  |
| ABCC6   | 4.535  | 0.16  |
| ABCC8   | 4.977  | 0     |
| ABCC9   | 4.788  | 0     |
| ABCD1   | 3.616  | 3.53  |
| ABCD1P2 | 0.782  | 0     |
| ABCD1P3 | 0.785  | 0     |
| ABCD1P4 | 0.782  | 0     |
| ABCD2   | 3.944  | 0.15  |
| ABCD3   | 3.403  | 3.34  |
| ABCD4   | 7.364  | 12.71 |
| ABCE1   | 3.524  | 3.98  |
| ABCF1   | 10.394 | 0     |
| ABCF2   | 7.904  | 1.66  |
| ABCF3   | 2.547  | 12.98 |
| ABCG1   | 5.055  | 3.13  |
| ABCG2   | 4.431  | 0.16  |
| ABCG4   | 3.836  | 0.03  |
| ABCG5   | 2.74   | 0     |
| ABCG8   | 2.665  | 0     |
| ABHD1   | 1.446  | 0.13  |
| ABHD10  | 2.569  | 4.54  |
| ABHD11  | 6.888  | 0.05  |

|         |        |       |
|---------|--------|-------|
| ABHD12  | 1.917  | 4.08  |
| ABHD13  | 5.302  | 3.06  |
| ABHD14A | 1.062  | 1.68  |
| ABHD14B | 1.816  | 37.43 |
| ABHD2   | 9.085  | 5.36  |
| ABHD3   | 2.024  | 3.47  |
| ABHD4   | 2.509  | 4.1   |
| ABHD5   | 1.428  | 1.18  |
| ABHD6   | 2.343  | 0.04  |
| ABHD7   | 1.418  | 0     |
| ABHD8   | 2.041  | 3.06  |
| ABHD9   | 1.81   | 0     |
| ABI1    | 4.374  | 32.01 |
| ABI1P   | 3.476  | 0.28  |
| ABI2    | 1.761  | 3.37  |
| ABI3    | 2.109  | 2.53  |
| ABI3BP  | 4.453  | 0     |
| ABL1    | 7.951  | 41.77 |
| ABL2    | 3.967  | 5.54  |
| ABLIM1  | 8.391  | 13.26 |
| ABLIM2  | 3.393  | 0.27  |
| ABLIM3  | 4.256  | 0     |
| ABO     | 1.579  | 0.25  |
| ABP1    | 4.856  | 0     |
| ABR     | 5.402  | 13.76 |
| ABRA    | 1.321  | 0     |
| ABT1    | 2.255  | 14.65 |
| ABTB1   | 3.239  | 9.38  |
| ABTB2   | 4.149  | 0.21  |
| ACAA1   | 1.695  | 17.33 |
| ACAA2   | 1.584  | 8.93  |
| ACACA   | 12.805 | 1.87  |
| ACACB   | 9.241  | 0.48  |
| ACAD10  | 3.959  | 2.98  |
| ACAD11  | 3.504  | 8.3   |
| ACAD8   | 2.231  | 6.03  |
| ACAD9   | 2.454  | 2.94  |
| ACADL   | 2.424  | 0     |
| ACADM   | 2.192  | 1.8   |
| ACADS   | 1.82   | 3.96  |
| ACADSB  | 5.836  | 0.88  |
| ACADVL  | 3.266  | 65.01 |
| ACAN    | 7.428  | 0.03  |
| ACAT1   | 1.518  | 7.69  |
| ACAT2   | 1.455  | 1.84  |
| ACBD3   | 3.565  | 7.16  |
| ACBD4   | 1.979  | 1.65  |
| ACBD5   | 2.286  | 3.85  |
| ACBD6   | 1.06   | 7.19  |
| ACBD7   | 2.379  | 0.42  |

|        |       |       |
|--------|-------|-------|
| ACCN1  | 3.443 | 0     |
| ACCN2  | 4.008 | 0     |
| ACCN3  | 4.202 | 1.06  |
| ACCN4  | 2.741 | 0.04  |
| ACCN5  | 1.692 | 0     |
| ACD    | 2.034 | 3.36  |
| ACE    | 7.288 | 0.04  |
| ACE2   | 3.393 | 0     |
| ACF    | 0.1   | 0     |
| ACHE   | 6.598 | 0.04  |
| ACIN1  | 6.804 | 27.85 |
| ACLY   | 4.353 | 6.75  |
| ACMSD  | 1.305 | 0     |
| ACN9   | 1.89  | 0.31  |
| ACO1   | 3.497 | 0.62  |
| ACO2   | 2.926 | 17.71 |
| ACOT1  | 1.603 | 2.16  |
| ACOT11 | 3.292 | 0.06  |
| ACOT12 | 1.821 | 0     |
| ACOT2  | 1.76  | 8.32  |
| ACOT4  | 1.632 | 0.06  |
| ACOT6  | 1.004 | 0     |
| ACOT7  | 2.389 | 2.15  |
| ACOT8  | 1.618 | 4.46  |
| ACOT9  | 2.385 | 28.34 |
| ACOX1  | 7.675 | 2.77  |
| ACOX2  | 2.296 | 0     |
| ACOX3  | 2.411 | 0.99  |
| ACOXL  | 2.007 | 0     |
| ACP1   | 1.639 | 35.26 |
| ACP2   | 2.109 | 11.02 |
| ACP5   | 1.415 | 0.84  |
| ACP6   | 1.788 | 1.82  |
| ACPL2  | 3.181 | 0.75  |
| ACPP   | 3.085 | 0.1   |
| ACPT   | 1.867 | 0     |
| ACR    | 1.375 | 1.51  |
| ACRBP  | 1.886 | 1.36  |
| ACRC   | 2.791 | 0.75  |
| ACRV1  | 2.638 | 0     |
| ACSBG1 | 2.83  | 0.04  |
| ACSBG2 | 2.712 | 0     |
| ACSL1  | 3.805 | 13.06 |
| ACSL3  | 4.361 | 2.5   |
| ACSL4  | 5.572 | 2.72  |
| ACSL5  | 3.929 | 2.87  |
| ACSL6  | 3.125 | 0.12  |
| ACSM1  | 1.945 | 0.1   |
| ACSM2  | 1.988 | 0     |
| ACSM3  | 2.372 | 0.92  |

|         |       |        |
|---------|-------|--------|
| ACSS1   | 4.473 | 20.59  |
| ACSS2   | 3.221 | 3.35   |
| ACTA1   | 1.493 | 0.13   |
| ACTA2   | 1.33  | 0      |
| ACTB    | 4.228 | 204.1  |
| ACTBL1  | 2.124 | 0      |
| ACTBP2  | 1.78  | 37.13  |
| ACTBP4  | 1.742 | 0.39   |
| ACTBP7  | 1.121 | 8.82   |
| ACTBP8  | 1.661 | 0.42   |
| ACTC1   | 1.493 | 0.06   |
| ACTG1   | 1.919 | 946.84 |
| ACTG2   | 1.331 | 0      |
| ACTGP1  | 1.951 | 0.36   |
| ACTGP10 | 0.909 | 0.32   |
| ACTGP2  | 2.102 | 1.79   |
| ACTGP3  | 1.114 | 1.24   |
| ACTGP9  | 1.651 | 1.26   |
| ACTL6A  | 2.335 | 1.99   |
| ACTL6B  | 2.99  | 1.09   |
| ACTL7A  | 1.433 | 0      |
| ACTL7B  | 1.34  | 0      |
| ACTL8   | 1.825 | 0      |
| ACTN1   | 3.994 | 19.55  |
| ACTN2   | 4.181 | 0      |
| ACTN3   | 2.857 | 0.14   |
| ACTN4   | 4.125 | 48.16  |
| ACTR10  | 1.587 | 6.92   |
| ACTR1A  | 2.823 | 17.34  |
| ACTR1B  | 2.052 | 31.87  |
| ACTR2   | 3.861 | 33.93  |
| ACTR3   | 3.212 | 15.22  |
| ACTR3B  | 4.398 | 0.43   |
| ACTR5   | 2.224 | 2.93   |
| ACTR6   | 1.755 | 1.41   |
| ACTR8   | 3.525 | 2.61   |
| ACTRT1  | 1.437 | 0      |
| ACTRT2  | 1.422 | 0      |
| ACVR1   | 2.951 | 0.77   |
| ACVR1B  | 5.536 | 7.92   |
| ACVR1C  | 3.251 | 0.03   |
| ACVR2A  | 5.244 | 1.48   |
| ACVR2B  | 1.584 | 0.56   |
| ACVRL1  | 1.971 | 0.3    |
| ACY1    | 1.415 | 3      |
| ACY1L2  | 4.708 | 2.96   |
| ACY3    | 1.3   | 11.79  |
| ACYP1   | 1.129 | 1.57   |
| ACYP2   | 1.068 | 1.3    |
| ADA     | 1.532 | 38.04  |

|          |        |       |
|----------|--------|-------|
| ADAL     | 1.559  | 1.27  |
| ADAM1    | 2.44   | 2.31  |
| ADAM10   | 4.586  | 12.6  |
| ADAM11   | 4.402  | 0.31  |
| ADAM12   | 6.395  | 0.02  |
| ADAM15   | 3.481  | 6.31  |
| ADAM17   | 3.845  | 13.02 |
| ADAM18   | 2.248  | 0     |
| ADAM19   | 7.074  | 2.38  |
| ADAM2    | 2.643  | 0     |
| ADAM20   | 2.792  | 0.18  |
| ADAM21   | 2.406  | 0     |
| ADAM21P  | 1.908  | 0     |
| ADAM22   | 8.596  | 0.03  |
| ADAM23   | 3.056  | 0     |
| ADAM28   | 3.862  | 0.15  |
| ADAM29   | 3.275  | 0     |
| ADAM30   | 2.958  | 0     |
| ADAM32   | 2.606  | 0     |
| ADAM33   | 3.519  | 2.08  |
| ADAM3A   | 74.183 | 0     |
| ADAM3B   | 0.577  | 0     |
| ADAM6    | 4.382  | 0     |
| ADAM7    | 2.57   | 0     |
| ADAM8    | 3.265  | 3.79  |
| ADAM9    | 5.896  | 3.36  |
| ADAMDEC1 | 2.175  | 0     |
| ADAMTS1  | 4.651  | 0     |
| ADAMTS10 | 4.237  | 0.72  |
| ADAMTS12 | 4.955  | 0     |
| ADAMTS13 | 5.81   | 0.2   |
| ADAMTS14 | 3.878  | 0.1   |
| ADAMTS15 | 2.853  | 0.04  |
| ADAMTS16 | 3.227  | 0     |
| ADAMTS17 | 3.448  | 0.12  |
| ADAMTS18 | 6.102  | 0.06  |
| ADAMTS19 | 5.089  | 0     |
| ADAMTS2  | 3.708  | 0.16  |
| ADAMTS20 | 6.337  | 0     |
| ADAMTS3  | 5.821  | 0     |
| ADAMTS4  | 4.331  | 0     |
| ADAMTS5  | 9.046  | 0     |
| ADAMTS6  | 7.268  | 0.1   |
| ADAMTS7  | 5.487  | 1.43  |
| ADAMTS8  | 4.012  | 0     |
| ADAMTS9  | 7.313  | 0     |
| ADAMTSL1 | 3.731  | 2.34  |
| ADAMTSL2 | 3.726  | 0.03  |
| ADAMTSL3 | 7.333  | 0     |
| ADAMTSL4 | 4.477  | 7.45  |

|           |        |       |
|-----------|--------|-------|
| ADAMTSL5  | 2.682  | 0     |
| ADAR      | 9.001  | 27.21 |
| ADARB1    | 10.69  | 0.07  |
| ADARB2    | 5.439  | 5.16  |
| ADAT1     | 2.727  | 2.11  |
| ADC       | 2.182  | 0.04  |
| ADCK1     | 2.183  | 1.32  |
| ADCK2     | 4.728  | 1.32  |
| ADCK4     | 2.253  | 3.08  |
| ADCK5     | 1.965  | 1.51  |
| ADCY1     | 25     | 0.03  |
| ADCY2     | 6.551  | 0     |
| ADCY3     | 4.802  | 10.57 |
| ADCY4     | 3.292  | 0.48  |
| ADCY5     | 3.842  | 0     |
| ADCY6     | 6.731  | 14.2  |
| ADCY7     | 6.142  | 5.24  |
| ADCY8     | 5.938  | 0     |
| ADCY9     | 7.725  | 2.1   |
| ADCYAP1   | 1.95   | 0     |
| ADCYAP1R1 | 3.286  | 0     |
| ADD1      | 6.718  | 26    |
| ADD2      | 7.587  | 0     |
| ADD3      | 5.024  | 24.34 |
| ADFP      | 1.98   | 44.42 |
| ADH1A     | 1.456  | 0     |
| ADH1B     | 2.666  | 0     |
| ADH1C     | 1.473  | 0     |
| ADH4      | 1.98   | 0     |
| ADH5      | 2.644  | 5.42  |
| ADH6      | 1.398  | 0.14  |
| ADH7      | 2.147  | 0     |
| ADHFE1    | 1.83   | 0.65  |
| ADI1      | 1.627  | 8.33  |
| ADIPOQ    | 4.578  | 0     |
| ADIPOR1   | 3.582  | 31.88 |
| ADIPOR2   | 3.965  | 17.77 |
| ADK       | 2.219  | 3.65  |
| ADLICANP  | 31.371 | 0     |
| ADM       | 1.449  | 3.34  |
| ADM2      | 4.05   | 1.44  |
| ADMR      | 1.57   | 0     |
| ADNP      | 4.916  | 29.82 |
| ADORA1    | 2.86   | 0     |
| ADORA2A   | 2.388  | 7.04  |
| ADORA2B   | 1.885  | 0.16  |
| ADORA2BP  | 1.779  | 0     |
| ADORA3    | 3.408  | 0.18  |
| ADPGK     | 5.153  | 25.38 |
| ADPRH     | 3.439  | 0.84  |

|          |        |        |
|----------|--------|--------|
| ADPRHL1  | 2.891  | 0.31   |
| ADPRHL2  | 1.658  | 9.79   |
| ADPRTL4  | 23.596 | 0.07   |
| ADRA1A   | 4.146  | 0      |
| ADRA1B   | 2.368  | 1.3    |
| ADRA1D   | 2.128  | 0.04   |
| ADRA2A   | 3.65   | 0      |
| ADRA2B   | 3.266  | 0.03   |
| ADRA2C   | 1.958  | 0      |
| ADRB1    | 1.723  | 0.17   |
| ADRB2    | 2.011  | 0.25   |
| ADRB3    | 2.644  | 0      |
| ADRBK1   | 6.333  | 129.46 |
| ADRBK2   | 3.628  | 1.39   |
| ADRM1    | 1.48   | 26.67  |
| ADSL     | 1.681  | 13.78  |
| ADSS     | 2.757  | 5.2    |
| ADSSL1   | 2.078  | 0.28   |
| ADTB1L1  | 0.191  | 0      |
| ADTB1L2  | 0.102  | 0      |
| AEBP1    | 8.161  | 3.04   |
| AEBP2    | 4.041  | 6.29   |
| AES      | 2.45   | 154.67 |
| AF357530 | 0.8    | 1.6    |
| AF357532 | 0.8    | 0      |
| AF357533 | 1.1    | 0      |
| AF357534 | 0.85   | 0.58   |
| AFAP1    | 7.668  | 0.92   |
| AFAP1L1  | 4.153  | 3.02   |
| AFAP1L2  | 5.512  | 36.11  |
| AFAR3    | 1.984  | 0.35   |
| AFARP1   | 1.324  | 0.52   |
| AFF1     | 10.094 | 61.42  |
| AFF2     | 13.746 | 0.35   |
| AFF3     | 8.213  | 5.03   |
| AFF4     | 10.012 | 33.83  |
| AFG3L1   | 5.419  | 4.14   |
| AFG3L2   | 2.963  | 6.38   |
| AFM      | 1.997  | 0      |
| AFMID    | 1.7    | 1.28   |
| AFP      | 2.032  | 0      |
| AFTPH    | 4.246  | 9.55   |
| AGA      | 2.041  | 2.43   |
| AGBL1    | 2.255  | 0      |
| AGBL2    | 3.391  | 0.06   |
| AGBL3    | 5.938  | 0.1    |
| AGBL4    | 3.938  | 0      |
| AGER     | 5.994  | 0      |
| AGGF1    | 4.466  | 1.86   |
| AGK      | 5.558  | 2.51   |



|         |        |       |
|---------|--------|-------|
| AGL     | 8.713  | 0.51  |
| AGMAT   | 2.196  | 0     |
| AGPAT1  | 6.897  | 0     |
| AGPAT2  | 1.548  | 13.87 |
| AGPAT3  | 6.609  | 2.41  |
| AGPAT4  | 14.78  | 1.64  |
| AGPAT5  | 4.305  | 10.16 |
| AGPAT6  | 2.842  | 14.87 |
| AGPAT7  | 1.908  | 4.52  |
| AGPS    | 3.824  | 28.54 |
| AGR2    | 3.364  | 0     |
| AGR3    | 1.5    | 0     |
| AGRN    | 7.319  | 7.09  |
| AGRP    | 0.764  | 0     |
| AGT     | 2.189  | 0     |
| AGTPBP1 | 4.218  | 6.03  |
| AGTR1   | 2.573  | 0.08  |
| AGTR2   | 2.449  | 0     |
| AGTRAP  | 3.041  | 1.79  |
| AGTRL1  | 3.847  | 0     |
| AGXT    | 1.599  | 0     |
| AGXT2   | 2.165  | 0     |
| AGXT2L1 | 2.099  | 0     |
| AGXT2L2 | 2.826  | 8.65  |
| AHCTF1  | 8.744  | 9.97  |
| AHCTF1P | 7.176  | 3.93  |
| AHCY    | 2.11   | 55.7  |
| AHCYL1  | 3.088  | 6.15  |
| AHDC1   | 5.958  | 14.93 |
| AHI1    | 5.529  | 1.25  |
| AHNAK   | 19.263 | 30.19 |
| AHR     | 11.628 | 2.82  |
| AHRR    | 2.48   | 0.04  |
| AHSA1   | 1.371  | 12.56 |
| AHSA2   | 3.02   | 24.21 |
| AHSG    | 1.534  | 0     |
| AICDA   | 2.791  | 0     |
| AIF1    | 6.222  | 0     |
| AIFM1   | 2.346  | 3.12  |
| AIFM2   | 3.24   | 0.4   |
| AIFM3   | 2.721  | 0     |
| AIG1    | 1.385  | 0.07  |
| AIM1    | 8.653  | 13.55 |
| AIM1L   | 1.831  | 0.11  |
| AIM2    | 1.484  | 0.13  |
| AIP     | 1.212  | 29.96 |
| AIPL1   | 2.971  | 0     |
| AIRE    | 3.16   | 0.16  |
| AJAP1   | 2.922  | 0     |
| AK1     | 2.277  | 7.25  |

|          |        |       |
|----------|--------|-------|
| AK2      | 4.069  | 6.27  |
| AK2B     | 1.978  | 1.6   |
| AK3      | 2.642  | 14.31 |
| AK3L1    | 2.669  | 0.37  |
| AK3L2    | 0.672  | 0     |
| AK3P1    | 0.672  | 0     |
| AK5      | 4.44   | 0.04  |
| AK7      | 2.649  | 0     |
| AKAP1    | 3.799  | 1.82  |
| AKAP10   | 2.917  | 5.6   |
| AKAP11   | 15.075 | 1.36  |
| AKAP12   | 9.449  | 16.89 |
| AKAP13   | 16.435 | 45.53 |
| AKAP14   | 1.006  | 0.2   |
| AKAP2    | 6.866  | 8.14  |
| AKAP3    | 3.02   | 0     |
| AKAP4    | 3.188  | 0     |
| AKAP5    | 2.601  | 0     |
| AKAP6    | 10.342 | 0.01  |
| AKAP7    | 3.121  | 0.41  |
| AKAP8    | 3.531  | 13.11 |
| AKAP8L   | 4.571  | 22.56 |
| AKAP9    | 28.573 | 1.72  |
| AKNA     | 5.378  | 23.35 |
| AKR1A1   | 1.535  | 23.53 |
| AKR1B1   | 3.558  | 30.56 |
| AKR1B10  | 3.07   | 0     |
| AKR1C1   | 1.379  | 0.21  |
| AKR1C2   | 1.59   | 0.06  |
| AKR1C3   | 1.224  | 1.21  |
| AKR1C4   | 1.194  | 0     |
| AKR1CL1  | 2.131  | 0     |
| AKR1CL2  | 1.61   | 0.61  |
| AKR1D1   | 5.384  | 0     |
| AKR1D1P  | 1.048  | 0     |
| AKR7A2   | 1.362  | 6.25  |
| AKR7A3   | 1.241  | 0.88  |
| AKT1     | 3.333  | 12.03 |
| AKT1S1   | 2.327  | 7.18  |
| AKT2     | 4.257  | 50.23 |
| AKT3     | 3.856  | 0.34  |
| AKTIP    | 2.334  | 1.53  |
| ALAD     | 3.54   | 2.4   |
| ALAS1    | 2.563  | 4.94  |
| ALAS2    | 2.367  | 6.11  |
| ALB      | 2.216  | 0     |
| ALCAM    | 4.741  | 4.76  |
| ALDH16A1 | 2.607  | 8.54  |
| ALDH18A1 | 3.616  | 1.88  |
| ALDH1A1  | 2.096  | 0.43  |

|           |        |       |
|-----------|--------|-------|
| ALDH1A2   | 3.563  | 0     |
| ALDH1A3   | 3.442  | 0.03  |
| ALDH1B1   | 3.025  | 0     |
| ALDH1L1   | 3.125  | 0     |
| ALDH1L2   | 2.794  | 0     |
| ALDH2     | 2.4    | 1.32  |
| ALDH3A1   | 1.641  | 0.12  |
| ALDH3A2   | 5.861  | 0.19  |
| ALDH3B1   | 2.815  | 1.02  |
| ALDH3B2   | 2.689  | 0     |
| ALDH4A1   | 3.56   | 0.81  |
| ALDH5A1   | 5.17   | 9.55  |
| ALDH6A1   | 2.183  | 0.59  |
| ALDH7A1   | 1.882  | 5.04  |
| ALDH7A1P1 | 1.816  | 3.27  |
| ALDH8A1   | 2.542  | 0.35  |
| ALDH9A1   | 2.696  | 2.9   |
| ALDOA     | 2.736  | 71.31 |
| ALDOAP1   | 1.97   | 2.06  |
| ALDOAP2   | 1.076  | 8.46  |
| ALDOB     | 1.653  | 0     |
| ALDOC     | 1.651  | 0.84  |
| ALDRP     | 1.596  | 0.99  |
| ALF       | 1.924  | 0     |
| ALG1      | 2.132  | 0.6   |
| ALG10     | 3.128  | 0.92  |
| ALG10B    | 1.763  | 1.29  |
| ALG11     | 2.538  | 2.42  |
| ALG12     | 2.375  | 14.75 |
| ALG13     | 1.327  | 5.44  |
| ALG14     | 1.015  | 0.39  |
| ALG2      | 2.83   | 5.84  |
| ALG3      | 1.52   | 3.32  |
| ALG5      | 1.127  | 7.46  |
| ALG6      | 1.979  | 1.55  |
| ALG8      | 1.997  | 1.14  |
| ALG9      | 2.07   | 8.79  |
| ALK       | 6.22   | 0     |
| ALKBH1    | 4.512  | 1.18  |
| ALKBH2    | 0.996  | 2.68  |
| ALKBH3    | 1.519  | 5.21  |
| ALKBH4    | 4.14   | 1.72  |
| ALKBH5    | 2.963  | 16.5  |
| ALKBH6    | 1.239  | 5.19  |
| ALKBH7    | 1.11   | 18.54 |
| ALKBH8    | 1.677  | 1.18  |
| ALLC      | 2.747  | 0     |
| ALMS1     | 12.922 | 1.06  |
| ALOX12    | 2.335  | 1.18  |
| ALOX12B   | 2.471  | 0     |

|          |        |       |
|----------|--------|-------|
| ALOX12P1 | 0.431  | 0     |
| ALOX12P2 | 52.658 | 0.04  |
| ALOX15   | 2.684  | 0.07  |
| ALOX15B  | 2.873  | 0     |
| ALOX5    | 5.046  | 26.78 |
| ALOX5AP  | 0.873  | 11.9  |
| ALOXE3   | 3.362  | 0     |
| ALPI     | 2.516  | 0     |
| ALPK1    | 4.28   | 1.92  |
| ALPK2    | 6.483  | 0.03  |
| ALPK3    | 10.914 | 0.04  |
| ALPL     | 2.582  | 0.61  |
| ALPP     | 2.867  | 0     |
| ALPPL2   | 2.486  | 0     |
| ALS2     | 6.47   | 1.07  |
| ALS2CL   | 5.048  | 1.08  |
| ALS2CR11 | 2.104  | 0     |
| ALS2CR12 | 1.78   | 0.39  |
| ALS2CR13 | 5.463  | 2.18  |
| ALS2CR16 | 0.883  | 0.12  |
| ALS2CR2  | 2.174  | 2.41  |
| ALS2CR4  | 2.076  | 0.67  |
| ALS2CR7  | 1.534  | 0     |
| ALS2CR8  | 3.44   | 1.15  |
| ALX3     | 1.771  | 0.17  |
| ALX4     | 1.586  | 0     |
| AMAC1    | 1.839  | 0     |
| AMAC1L1  | 1.201  | 0     |
| AMAC1L2  | 1.201  | 0.08  |
| AMAC1L3  | 1.195  | 0     |
| AMACR    | 4.247  | 0.3   |
| AMBN     | 1.977  | 0     |
| AMBP     | 1.397  | 0     |
| AMD1     | 3.895  | 42.98 |
| AMDHD1   | 2.135  | 0     |
| AMDHD2   | 1.521  | 3.45  |
| AMDP1    | 1.569  | 0.25  |
| AMELX    | 0.835  | 0     |
| AMELY    | 0.802  | 0     |
| AMFR     | 3.594  | 33.64 |
| AMH      | 2.008  | 0.05  |
| AMHR2    | 1.855  | 0     |
| AMICA1   | 1.959  | 0.51  |
| AMIGO1   | 2.439  | 0.12  |
| AMIGO2   | 3.763  | 0.24  |
| AMIGO3   | 2.159  | 2.2   |
| AMMECR1  | 5.417  | 1.32  |
| AMMECR1L | 4.648  | 2.98  |
| AMN      | 1.896  | 0.94  |
| AMN1     | 1.966  | 1.26  |

|         |        |       |
|---------|--------|-------|
| AMOT    | 6.514  | 1.05  |
| AMOTL1  | 8.999  | 2.36  |
| AMOTL2  | 4.984  | 1.08  |
| AMPD1   | 2.341  | 0     |
| AMPD2   | 4.711  | 5.4   |
| AMPD3   | 5.396  | 0.46  |
| AMPH    | 6.542  | 0.02  |
| AMT     | 2.103  | 6.03  |
| AMTN    | 0.996  | 0     |
| AMY1A   | 2.03   | 0     |
| AMY1B   | 1.838  | 0     |
| AMY1C   | 1.86   | 0     |
| AMY2A   | 1.632  | 0.06  |
| AMY2B   | 2.181  | 2.68  |
| AMYP1   | 6.17   | 0     |
| AMZ1    | 8.83   | 0.29  |
| AMZ2    | 2.246  | 9.07  |
| ANAPC1  | 6.312  | 4.62  |
| ANAPC10 | 0.918  | 5.49  |
| ANAPC11 | 2.156  | 5.64  |
| ANAPC13 | 1.17   | 7.02  |
| ANAPC2  | 3.947  | 15.74 |
| ANAPC4  | 2.672  | 3.37  |
| ANAPC5  | 2.644  | 31.58 |
| ANAPC7  | 2.057  | 6.4   |
| ANG     | 0.789  | 0     |
| ANGEL1  | 4.058  | 2.76  |
| ANGEL2  | 4.649  | 3.83  |
| ANGPT1  | 4.338  | 0     |
| ANGPT2  | 2.227  | 8.67  |
| ANGPT4  | 1.922  | 0     |
| ANGPTL1 | 3.546  | 0.14  |
| ANGPTL2 | 3.572  | 0     |
| ANGPTL3 | 2.126  | 0.04  |
| ANGPTL4 | 1.903  | 0.11  |
| ANGPTL5 | 2.37   | 0     |
| ANGPTL6 | 1.857  | 0.85  |
| ANGPTL7 | 2.238  | 0.09  |
| ANK1    | 12.022 | 0.14  |
| ANK2    | 14.15  | 0     |
| ANK3    | 15.717 | 0.04  |
| ANKAR   | 4.109  | 0.29  |
| ANKDD1A | 2.802  | 0.84  |
| ANKFN1  | 2.426  | 0     |
| ANKFY1  | 8.089  | 3.29  |
| ANKH    | 4.086  | 0.48  |
| ANKHD1  | 8.554  | 8.07  |
| ANKIB1  | 13.01  | 1.15  |
| ANKK1   | 2.543  | 0     |
| ANKMY1  | 3.595  | 3.41  |

|           |         |       |
|-----------|---------|-------|
| ANKMY2    | 5       | 1.03  |
| ANKRA2    | 2.047   | 5.17  |
| ANKRD1    | 1.974   | 0     |
| ANKRD10   | 5.247   | 35.77 |
| ANKRD11   | 21.966  | 27.03 |
| ANKRD12   | 9.036   | 6.81  |
| ANKRD13A  | 3.91    | 12.35 |
| ANKRD13B  | 2.632   | 1.16  |
| ANKRD13C  | 3.009   | 6.71  |
| ANKRD13D  | 2.219   | 8.29  |
| ANKRD15   | 8.075   | 0.51  |
| ANKRD16   | 2.49    | 1     |
| ANKRD17   | 9.375   | 5.84  |
| ANKRD18A  | 2.421   | 0     |
| ANKRD18B  | 4.327   | 0     |
| ANKRD19   | 2.234   | 16.87 |
| ANKRD2    | 1.451   | 0     |
| ANKRD20A1 | 3.511   | 0     |
| ANKRD20A2 | 3.511   | 0     |
| ANKRD20A3 | 3.964   | 0     |
| ANKRD20B  | 100.107 | 0     |
| ANKRD21   | 1.826   | 0     |
| ANKRD22   | 1.127   | 0.27  |
| ANKRD23   | 2.582   | 0.69  |
| ANKRD24   | 3.861   | 0.11  |
| ANKRD25   | 5.188   | 35.24 |
| ANKRD26   | 5.36    | 1     |
| ANKRD27   | 4.423   | 1.5   |
| ANKRD28   | 6.805   | 9.96  |
| ANKRD29   | 2.276   | 0.48  |
| ANKRD30A  | 4.458   | 0     |
| ANKRD30B  | 3.429   | 0     |
| ANKRD31   | 6.036   | 0     |
| ANKRD32   | 1.854   | 2.24  |
| ANKRD33   | 1.935   | 0     |
| ANKRD34   | 3.612   | 0.36  |
| ANKRD35   | 3.323   | 0.09  |
| ANKRD36   | 2.905   | 0.96  |
| ANKRD37   | 0.934   | 0.95  |
| ANKRD38   | 4.493   | 0     |
| ANKRD39   | 0.837   | 1.65  |
| ANKRD40   | 2.03    | 8.91  |
| ANKRD41   | 2.907   | 0.65  |
| ANKRD42   | 2.302   | 0.3   |
| ANKRD43   | 3.2     | 0     |
| ANKRD44   | 3.686   | 4.19  |
| ANKRD45   | 2.671   | 0.04  |
| ANKRD46   | 2.779   | 0.46  |
| ANKRD47   | 2.786   | 0.85  |
| ANKRD49   | 1.905   | 8.52  |

|         |        |       |
|---------|--------|-------|
| ANKRD5  | 3.823  | 0.08  |
| ANKRD50 | 7.763  | 0.36  |
| ANKRD53 | 1.962  | 0.1   |
| ANKRD54 | 2.049  | 4.54  |
| ANKRD55 | 2.837  | 0.07  |
| ANKRD56 | 2.921  | 0     |
| ANKRD57 | 4.673  | 0     |
| ANKRD58 | 1.725  | 2.24  |
| ANKRD6  | 2.969  | 0.06  |
| ANKRD7  | 2.126  | 0     |
| ANKRD9  | 1.626  | 0.3   |
| ANKS1A  | 6.348  | 5.72  |
| ANKS1B  | 6.543  | 0     |
| ANKS3   | 2.662  | 2.27  |
| ANKS4B  | 2.906  | 0     |
| ANKS6   | 7.147  | 0.25  |
| ANKZF1  | 3.38   | 30.47 |
| ANLN    | 9.54   | 0.32  |
| ANP32A  | 2.464  | 32.56 |
| ANP32B  | 1.461  | 97.86 |
| ANP32C  | 0.705  | 6.59  |
| ANP32D  | 0.396  | 2.5   |
| ANP32E  | 3.269  | 5.11  |
| ANPEP   | 3.478  | 1.54  |
| ANTXR1  | 6.746  | 0.09  |
| ANTXR2  | 3.864  | 10.91 |
| ANTXRL  | 1.946  | 0     |
| ANUBL1  | 3.241  | 2.38  |
| ANXA1   | 1.399  | 7.78  |
| ANXA10  | 1.428  | 0     |
| ANXA11  | 3.783  | 35.02 |
| ANXA13  | 1.593  | 0     |
| ANXA2   | 1.81   | 21.04 |
| ANXA2P1 | 1.343  | 0.81  |
| ANXA2P2 | 1.298  | 13.41 |
| ANXA2P3 | 1.355  | 1.09  |
| ANXA3   | 1.331  | 1.93  |
| ANXA4   | 1.957  | 2.22  |
| ANXA5   | 1.632  | 0.79  |
| ANXA6   | 2.915  | 21.31 |
| ANXA7   | 2.173  | 22.18 |
| ANXA8   | 2.03   | 0     |
| ANXA9   | 1.765  | 0.17  |
| AOAH    | 4.498  | 0.11  |
| AOC2    | 2.87   | 0.07  |
| AOC3    | 4.026  | 0.08  |
| AOF1    | 3.811  | 1.32  |
| AOF2    | 5.091  | 30.18 |
| AOX1    | 4.934  | 0.02  |
| AOX2    | 24.514 | 0.18  |

|         |        |       |
|---------|--------|-------|
| AP1B1   | 6.129  | 65.1  |
| AP1G1   | 6.85   | 31.63 |
| AP1G2   | 4.161  | 27.63 |
| AP1GBP1 | 5.098  | 2.95  |
| AP1M1   | 2.284  | 8.8   |
| AP1M2   | 1.889  | 1.68  |
| AP1S1   | 2.466  | 0.84  |
| AP1S2   | 2.283  | 3.56  |
| AP1S3   | 4.002  | 0.22  |
| AP2A1   | 3.499  | 12.98 |
| AP2A2   | 5.42   | 16.55 |
| AP2B1   | 5.763  | 11.37 |
| AP2M1   | 2.172  | 62.32 |
| AP2S1   | 0.89   | 22.01 |
| AP3B1   | 3.986  | 7.77  |
| AP3B2   | 3.704  | 0     |
| AP3D1   | 4.868  | 16.32 |
| AP3M1   | 3.713  | 10.23 |
| AP3M2   | 3.471  | 6.55  |
| AP3S1   | 2.045  | 9.82  |
| AP3S2   | 2.562  | 5.02  |
| AP4B1   | 2.434  | 8.94  |
| AP4E1   | 6.682  | 2.36  |
| AP4M1   | 3.634  | 1.66  |
| AP4S1   | 1.572  | 0.25  |
| APAF1   | 10.362 | 1.57  |
| APBA1   | 3.778  | 0     |
| APBA2   | 3.623  | 0.41  |
| APBA2BP | 2.168  | 1.6   |
| APBA3   | 2.158  | 2.2   |
| APBB1   | 2.711  | 2.08  |
| APBB1IP | 3.072  | 14.98 |
| APBB2   | 4.564  | 0     |
| APBB3   | 2.273  | 9.96  |
| APC     | 10.702 | 1.92  |
| APC2    | 10.151 | 0.03  |
| APCDD1  | 2.558  | 2.36  |
| APCDD1L | 3.112  | 0     |
| APCS    | 0.931  | 0     |
| APEH    | 2.758  | 2.98  |
| APEX1   | 2.134  | 59.62 |
| APEX2   | 1.977  | 4.81  |
| APH1A   | 2.276  | 64.81 |
| APH1B   | 0.939  | 0.95  |
| API5    | 3.734  | 9.11  |
| APIP    | 1.225  | 7.43  |
| APITD1  | 2.796  | 0.28  |
| APLN    | 3.116  | 0.04  |
| APLP1   | 2.474  | 0     |
| APLP2   | 3.721  | 8.99  |



|          |        |       |
|----------|--------|-------|
| APOA1    | 0.897  | 2.43  |
| APOA1BP  | 1.121  | 6.97  |
| APOA2    | 0.473  | 0     |
| APOA4    | 1.46   | 0     |
| APOA5    | 1.867  | 0     |
| APOB     | 14.121 | 0     |
| APOB48R  | 3.722  | 2.76  |
| APOBEC1  | 0.892  | 0     |
| APOBEC2  | 1.186  | 0.08  |
| APOBEC3A | 1.348  | 1.25  |
| APOBEC3B | 1.536  | 0.52  |
| APOBEC3C | 1.127  | 5.18  |
| APOBEC3D | 1.114  | 0.71  |
| APOBEC3E | 4.687  | 0.23  |
| APOBEC3F | 2.971  | 0.67  |
| APOBEC3G | 1.708  | 4.35  |
| APOBEC3H | 0.916  | 1.19  |
| APOBEC4  | 2.648  | 0     |
| APOC1    | 0.461  | 0.21  |
| APOC2    | 0.721  | 0     |
| APOC3    | 0.533  | 0     |
| APOC4    | 0.613  | 0     |
| APOD     | 1.04   | 0     |
| APOE     | 1.18   | 0.76  |
| APOF     | 1.689  | 0.12  |
| APOH     | 1.171  | 0     |
| APOL1    | 3.073  | 1.32  |
| APOL2    | 2.889  | 5.37  |
| APOL3    | 5.534  | 13.27 |
| APOL4    | 3.478  | 0.28  |
| APOL5    | 1.438  | 0     |
| APOL6    | 10.139 | 5.24  |
| APOLD1   | 4.569  | 51.47 |
| APOM     | 2.283  | 0     |
| APOO     | 1.104  | 1.98  |
| APOOL    | 0.911  | 2.93  |
| APP      | 3.627  | 15.9  |
| APPBP1   | 2.113  | 12.64 |
| APPBP2   | 6.544  | 2.76  |
| APPL1    | 5.969  | 4.64  |
| APPL2    | 3.23   | 9.55  |
| APR-2    | 0.794  | 0     |
| APRIN    | 7.437  | 5.24  |
| APRT     | 1.301  | 38.79 |
| APTX     | 4.391  | 1.64  |
| APXLP    | 2.163  | 0     |
| AQP1     | 5.508  | 0.23  |
| AQP10    | 1.791  | 0     |
| AQP11    | 1.446  | 0.34  |
| AQP12A   | 1.084  | 0     |

|           |        |        |
|-----------|--------|--------|
| AQP2      | 4.174  | 0      |
| AQP3      | 1.824  | 2.12   |
| AQP4      | 5.633  | 0      |
| AQP5      | 1.32   | 0      |
| AQP6      | 2.654  | 0      |
| AQP7      | 1.256  | 0      |
| AQP7P1    | 22.458 | 0.08   |
| AQP7P2    | 19.277 | 0      |
| AQP7P3    | 17.513 | 0.01   |
| AQP8      | 1.308  | 0.38   |
| AQP9      | 2.949  | 1.48   |
| AQR       | 5.08   | 6.21   |
| AR        | 4.496  | 0      |
| ARAF      | 3.614  | 19.87  |
| ARAFPS2   | 2.036  | 0.24   |
| ARC       | 2.943  | 0.57   |
| ARCN1     | 3.904  | 7.83   |
| ARD1A     | 0.882  | 24.68  |
| AREG      | 1.238  | 1.68   |
| ARF1      | 2.507  | 121.87 |
| ARF1P1    | 4.87   | 0.53   |
| ARF3      | 3.595  | 22.49  |
| ARF4      | 1.603  | 13.34  |
| ARF4P     | 0.543  | 6.19   |
| ARF4P2    | 0.827  | 0      |
| ARF4P3    | 4.223  | 0.03   |
| ARF5      | 2.16   | 32.43  |
| ARF6      | 1.798  | 52.22  |
| ARFGAP1   | 3.496  | 18.17  |
| ARFGAP3   | 2.725  | 10.31  |
| ARFGEF1   | 8.312  | 9.19   |
| ARFGEF2   | 7.05   | 10.55  |
| ARFIP1    | 3.223  | 0.15   |
| ARFIP2    | 2.596  | 12.35  |
| ARFRP1    | 1.74   | 5.57   |
| ARG1      | 1.447  | 3.89   |
| ARG2      | 1.981  | 8.14   |
| ARGFX     | 5.065  | 0.08   |
| ARGFXP1   | 4.865  | 0.04   |
| ARGFXP2   | 1.215  | 0      |
| ARHGAP1   | 3.346  | 11.23  |
| ARHGAP10  | 3.056  | 2.2    |
| ARHGAP11A | 6.021  | 0.94   |
| ARHGAP12  | 4.172  | 9.06   |
| ARHGAP15  | 1.695  | 9.51   |
| ARHGAP16P | 0.781  | 0      |
| ARHGAP17  | 7.049  | 29.28  |
| ARHGAP18  | 3.499  | 0.4    |
| ARHGAP19  | 5.463  | 1.38   |
| ARHGAP20  | 6.189  | 0      |

|           |        |        |
|-----------|--------|--------|
| ARHGAP21  | 7.109  | 14.09  |
| ARHGAP22  | 2.749  | 1.26   |
| ARHGAP23  | 6.475  | 3.41   |
| ARHGAP24  | 5.651  | 12.22  |
| ARHGAP25  | 3.561  | 8.61   |
| ARHGAP26  | 9.041  | 2.05   |
| ARHGAP27  | 3.993  | 54.23  |
| ARHGAP28  | 5.768  | 0      |
| ARHGAP29  | 5.573  | 11.59  |
| ARHGAP30  | 5.412  | 11.11  |
| ARHGAP4   | 3.235  | 125.52 |
| ARHGAP5   | 9.749  | 2.9    |
| ARHGAP6   | 10.149 | 0      |
| ARHGAP8   | 1.725  | 0.17   |
| ARHGAP9   | 2.912  | 14.3   |
| ARHGDIA   | 1.862  | 131.99 |
| ARHGDIB   | 1.216  | 368.33 |
| ARHGDIG   | 0.942  | 0.11   |
| ARHGEF1   | 5.005  | 58.11  |
| ARHGEF10  | 5.591  | 0.41   |
| ARHGEF10L | 4.494  | 0      |
| ARHGEF11  | 6.889  | 1      |
| ARHGEF12  | 9.501  | 0.13   |
| ARHGEF15  | 4.165  | 0.03   |
| ARHGEF16  | 2.183  | 0.22   |
| ARHGEF17  | 9.443  | 21.17  |
| ARHGEF18  | 5.345  | 19.7   |
| ARHGEF19  | 3.029  | 0.16   |
| ARHGEF2   | 4.908  | 40.68  |
| ARHGEF3   | 3.56   | 3.42   |
| ARHGEF4   | 5.561  | 0.05   |
| ARHGEF5   | 10.976 | 0.49   |
| ARHGEF6   | 5.272  | 6.56   |
| ARHGEF7   | 18.185 | 83.98  |
| ARHGEF9   | 5.412  | 3.64   |
| ARID1A    | 9.417  | 27.28  |
| ARID1B    | 8.264  | 10.39  |
| ARID2     | 8.466  | 8.17   |
| ARID3A    | 2.724  | 1.27   |
| ARID3B    | 4.205  | 3.79   |
| ARID3C    | 1.239  | 0      |
| ARID4A    | 5.187  | 17.09  |
| ARID4B    | 6.374  | 11.35  |
| ARID5A    | 5.392  | 175.5  |
| ARID5B    | 7.737  | 34.8   |
| ARIH1     | 4.911  | 37.77  |
| ARIH2     | 5.434  | 21.19  |
| ARL1      | 3.199  | 3.65   |
| ARL10     | 2.402  | 0.04   |
| ARL11     | 3.76   | 1.45   |

|         |       |       |
|---------|-------|-------|
| ARL13A  | 1.002 | 0     |
| ARL13B  | 5.449 | 0.05  |
| ARL14   | 1.29  | 0     |
| ARL15   | 2.486 | 0.64  |
| ARL16   | 1.207 | 13.6  |
| ARL17P1 | 0.798 | 0.5   |
| ARL2    | 0.895 | 5.41  |
| ARL2BP  | 2.1   | 11.69 |
| ARL3    | 3.87  | 1.64  |
| ARL4A   | 6.872 | 0.16  |
| ARL4C   | 4.009 | 2.35  |
| ARL4D   | 1.585 | 8.05  |
| ARL4P2  | 1.147 | 0     |
| ARL5A   | 3.594 | 4.19  |
| ARL5B   | 3.589 | 2.65  |
| ARL6    | 1.453 | 0     |
| ARL6IP1 | 2.264 | 21.46 |
| ARL6IP2 | 2.254 | 12.99 |
| ARL6IP4 | 2.479 | 34.85 |
| ARL6IP5 | 2.128 | 28.82 |
| ARL6IP6 | 1.762 | 3.32  |
| ARL8A   | 2.345 | 16.08 |
| ARL8B   | 2.985 | 21.38 |
| ARL9    | 0.836 | 1.54  |
| ARMC1   | 2.649 | 2.57  |
| ARMC10  | 5.258 | 1.11  |
| ARMC2   | 3.239 | 0.58  |
| ARMC3   | 2.802 | 0     |
| ARMC4   | 3.572 | 0     |
| ARMC5   | 4.672 | 2.27  |
| ARMC6   | 2.289 | 3.72  |
| ARMC7   | 2.126 | 0.7   |
| ARMC8   | 5.759 | 5.34  |
| ARMC9   | 2.178 | 0.13  |
| ARMCX1  | 2.141 | 7.39  |
| ARMCX2  | 3.079 | 0.29  |
| ARMCX3  | 3.838 | 14.64 |
| ARMCX4  | 3.833 | 3.95  |
| ARMCX5  | 2.944 | 3.53  |
| ARMCX6  | 1.848 | 6.74  |
| ARMET   | 0.875 | 12.67 |
| ARMETL1 | 1.33  | 0.67  |
| ARMS2   | 0.808 | 0     |
| ARNT    | 7.267 | 4.2   |
| ARNT2   | 6.559 | 0.07  |
| ARNTL   | 3.015 | 3.08  |
| ARNTL2  | 1.93  | 0.15  |
| ARP11   | 2.436 | 0.16  |
| ARPC1A  | 3.186 | 4.88  |
| ARPC1B  | 3.04  | 15.1  |

|         |        |        |
|---------|--------|--------|
| ARPC2   | 3.057  | 41.92  |
| ARPC3   | 1.412  | 46.46  |
| ARPC3B  | 0.8    | 3.34   |
| ARPC4   | 2.484  | 29.47  |
| ARPC5   | 1.982  | 12.53  |
| ARPC5L  | 4.148  | 49.01  |
| ARPM1   | 2.001  | 0.2    |
| ARPP-19 | 5.978  | 27.3   |
| ARPP-21 | 5.489  | 0.21   |
| ARR3    | 1.292  | 0.23   |
| ARRB1   | 2.58   | 4.03   |
| ARRB2   | 2.388  | 42.26  |
| ARRDC1  | 2.205  | 10.82  |
| ARRDC2  | 3.32   | 109.15 |
| ARRDC3  | 4.133  | 16.8   |
| ARRDC4  | 4.049  | 3.76   |
| ARRDC5  | 1.638  | 1.81   |
| ARS2    | 6.954  | 12.13  |
| ARSA    | 2.326  | 10.98  |
| ARSB    | 6.829  | 1.39   |
| ARSD    | 6.319  | 1.58   |
| ARSDP   | 24.443 | 0.02   |
| ARSE    | 1.858  | 0      |
| ARSEP   | 15.262 | 0.02   |
| ARSF    | 2.012  | 0      |
| ARSG    | 2.013  | 0.05   |
| ARSH    | 1.689  | 0      |
| ARSI    | 1.71   | 1.16   |
| ARSJ    | 4.536  | 0      |
| ARSK    | 2.381  | 0.2    |
| ART1    | 1.312  | 0      |
| ART2P   | 0.69   | 0      |
| ART3    | 1.525  | 0      |
| ART4    | 1.371  | 0      |
| ART5    | 1.451  | 0      |
| ARTN    | 2.631  | 9.44   |
| ARTS-1  | 5.327  | 5.85   |
| ARV1    | 1.445  | 0.89   |
| ARVCF   | 4.019  | 1.5    |
| ARX     | 2.184  | 0      |
| AS3MT   | 1.729  | 0.57   |
| ASAH1   | 2.636  | 8.75   |
| ASAH2   | 2.289  | 0      |
| ASAH3   | 0.795  | 0      |
| ASAH3L  | 2.852  | 0.66   |
| ASAHL   | 1.238  | 7.75   |
| ASAM    | 2.643  | 0.07   |
| ASB1    | 6.833  | 0.51   |
| ASB10   | 3.64   | 0      |
| ASB11   | 1.151  | 0      |

|         |        |       |
|---------|--------|-------|
| ASB12   | 1.069  | 0.09  |
| ASB13   | 2.699  | 20.6  |
| ASB14   | 2.199  | 2.29  |
| ASB15   | 5.412  | 0     |
| ASB16   | 2.139  | 11.38 |
| ASB17   | 1.105  | 0     |
| ASB18   | 2.293  | 0     |
| ASB2    | 2.742  | 0     |
| ASB3    | 2.373  | 6.21  |
| ASB4    | 4.54   | 0     |
| ASB5    | 2.929  | 0     |
| ASB6    | 8.472  | 3.7   |
| ASB7    | 3.748  | 4.17  |
| ASB8    | 2.799  | 14.43 |
| ASB9    | 2.735  | 1.09  |
| ASCC1   | 2.076  | 15.82 |
| ASCC2   | 2.781  | 15.01 |
| ASCC3   | 10.492 | 1.59  |
| ASCC3L1 | 7.355  | 49.73 |
| ASCIZ   | 4.866  | 2.64  |
| ASCL1   | 2.469  | 0     |
| ASCL2   | 1.849  | 0.27  |
| ASCL3   | 0.65   | 0     |
| ASCL4   | 2.254  | 0     |
| ASCL5   | 0.837  | 0     |
| ASF1A   | 2.059  | 2.12  |
| ASF1B   | 1.731  | 1.6   |
| ASGR1   | 1.283  | 1.16  |
| ASGR2   | 1.747  | 0.4   |
| ASH1L   | 9.926  | 6.61  |
| ASH2L   | 2.36   | 7.63  |
| ASH2LP1 | 1.411  | 0     |
| ASIP    | 0.584  | 0.34  |
| ASL     | 4.344  | 1.43  |
| ASLL    | 4.186  | 1.7   |
| ASMT    | 1.37   | 1.37  |
| ASMTL   | 1.891  | 10.15 |
| ASNA1   | 1.28   | 14.53 |
| ASNS    | 5.904  | 0.75  |
| ASNSD1  | 2.448  | 5.78  |
| ASPA    | 1.418  | 0     |
| ASPH    | 7.176  | 0.1   |
| ASPHD1  | 1.478  | 0.13  |
| ASPHD2  | 2.857  | 8.93  |
| ASPM    | 10.434 | 0.37  |
| ASPN    | 2.47   | 0     |
| ASPSCR1 | 1.843  | 4.3   |
| ASRGL1  | 1.321  | 0.07  |
| ASS1    | 1.67   | 0.47  |
| ASSP10  | 1.545  | 0     |

|         |        |        |
|---------|--------|--------|
| ASSP12  | 1.227  | 0.24   |
| ASSP2   | 1.51   | 0      |
| ASSP4   | 1.52   | 0      |
| ASSP5   | 1.498  | 0      |
| ASSP6   | 1.529  | 0      |
| ASSP8   | 0.876  | 0      |
| ASSP9   | 1.542  | 0.06   |
| ASTE1   | 2.662  | 0.67   |
| ASTL    | 1.296  | 0.23   |
| ASTN1   | 7.524  | 0      |
| ASTN2   | 5.917  | 0.04   |
| ASXL1   | 7.033  | 18.82  |
| ASXL2   | 7.216  | 1.21   |
| ASXL3   | 7.537  | 0      |
| ASZ1    | 3.662  | 0      |
| ATAD1   | 3.034  | 6.69   |
| ATAD2   | 4.896  | 5.5    |
| ATAD2B  | 8.103  | 3.85   |
| ATAD3A  | 2.611  | 2.46   |
| ATAD3B  | 2.433  | 7.61   |
| ATAD3C  | 1.817  | 0.05   |
| ATAD4   | 1.385  | 0      |
| ATAD5   | 6.245  | 1.96   |
| ATBF1   | 12.106 | 2.56   |
| ATCAY   | 3.41   | 0      |
| ATE1    | 2.338  | 1.69   |
| ATF1    | 1.551  | 1.59   |
| ATF2    | 2.677  | 13.68  |
| ATF3    | 3.801  | 4.09   |
| ATF4    | 2.502  | 101.99 |
| ATF5    | 2.008  | 5.27   |
| ATF6    | 3.249  | 19.86  |
| ATF7    | 3.4    | 5.59   |
| ATF7IP  | 4.893  | 30.43  |
| ATF7IP2 | 5.031  | 10.34  |
| ATG10   | 1.817  | 0.33   |
| ATG12   | 2.359  | 5.41   |
| ATG16L1 | 3.738  | 9.77   |
| ATG16L2 | 2.627  | 14.5   |
| ATG3    | 1.242  | 31.7   |
| ATG4A   | 2.889  | 2.19   |
| ATG4B   | 4.659  | 11.42  |
| ATG4C   | 1.901  | 0.47   |
| ATG4D   | 1.896  | 25.3   |
| ATG5    | 3.244  | 4.03   |
| ATG7    | 2.362  | 1.55   |
| ATG9A   | 3.69   | 33.46  |
| ATG9B   | 9.599  | 0.28   |
| ATHL1   | 4.231  | 39.21  |
| ATIC    | 1.91   | 5.02   |

|          |        |        |
|----------|--------|--------|
| ATM      | 13.471 | 3.43   |
| ATN1     | 4.419  | 58.1   |
| ATOH1    | 1.065  | 0      |
| ATOH7    | 1.475  | 0.07   |
| ATOH8    | 2.435  | 1.87   |
| ATOX1    | 0.489  | 11.73  |
| ATP10A   | 6.947  | 8.2    |
| ATP10B   | 6.896  | 0.05   |
| ATP10D   | 6.55   | 0.6    |
| ATP11A   | 14.122 | 4.97   |
| ATP11B   | 7.524  | 11.19  |
| ATP11C   | 8.735  | 0.83   |
| ATP12A   | 3.565  | 0      |
| ATP13A1  | 3.483  | 12.56  |
| ATP13A2  | 3.84   | 16.91  |
| ATP13A3  | 4.102  | 3.57   |
| ATP13A4  | 4.274  | 0.03   |
| ATP13A5  | 3.657  | 0      |
| ATP1A1   | 4.27   | 13.41  |
| ATP1A2   | 5.436  | 0      |
| ATP1A3   | 3.551  | 0.36   |
| ATP1A4   | 4.364  | 0      |
| ATP1B1   | 2.987  | 0.1    |
| ATP1B2   | 3.332  | 0      |
| ATP1B3   | 2.04   | 43.89  |
| ATP1B3P1 | 2.014  | 1.43   |
| ATP1B4   | 3.856  | 0      |
| ATP1BL1  | 2.051  | 0.04   |
| ATP2A1   | 3.866  | 0.97   |
| ATP2A2   | 6.441  | 18.41  |
| ATP2A3   | 9.79   | 14.75  |
| ATP2B1   | 10.18  | 1.52   |
| ATP2B2   | 6.805  | 0.03   |
| ATP2B3   | 9.526  | 0      |
| ATP2B4   | 13.443 | 2.99   |
| ATP2C1   | 6.082  | 3.51   |
| ATP2C2   | 3.6    | 0.03   |
| ATP4A    | 3.559  | 0      |
| ATP4B    | 1.488  | 0.13   |
| ATP5A1   | 2.035  | 125.83 |
| ATP5B    | 2.509  | 122.64 |
| ATP5C1   | 1.291  | 41.77  |
| ATP5C2   | 0.1    | 0      |
| ATP5D    | 1.088  | 39.56  |
| ATP5E    | 0.533  | 260.06 |
| ATP5EP1  | 0.419  | 0      |
| ATP5F1   | 2.116  | 35.59  |
| ATP5G1   | 0.702  | 7.61   |
| ATP5G2   | 1.437  | 147.55 |
| ATP5G3   | 2.863  | 19.87  |



|           |       |        |
|-----------|-------|--------|
| ATP5GP1   | 0.628 | 8.04   |
| ATP5GP2   | 0.563 | 2.46   |
| ATP5GP3   | 0.547 | 0      |
| ATP5GP4   | 0.525 | 1.32   |
| ATP5H     | 0.622 | 22.11  |
| ATP5I     | 0.36  | 153.08 |
| ATP5J     | 3.357 | 7.11   |
| ATP5J2    | 1.557 | 16.96  |
| ATP5J2P2  | 0.428 | 38.14  |
| ATP5L     | 1.338 | 103.08 |
| ATP5L2    | 0.799 | 1.49   |
| ATP5LP1   | 0.453 | 0      |
| ATP5LP2   | 0.411 | 22.87  |
| ATP5LP3   | 0.71  | 2.78   |
| ATP5O     | 0.806 | 70.21  |
| ATP5S     | 2.424 | 2.33   |
| ATP6      | 0.681 | 0      |
| ATP6AP1   | 2.099 | 21.26  |
| ATP6AP2   | 2.037 | 9.42   |
| ATP6V0A1  | 4.122 | 0.48   |
| ATP6V0A2  | 4.681 | 1.9    |
| ATP6V0A4  | 6.714 | 0.04   |
| ATP6V0B   | 2.654 | 43.51  |
| ATP6V0C   | 2.108 | 82.65  |
| ATP6V0D1  | 1.67  | 40.34  |
| ATP6V0D2  | 2.37  | 0      |
| ATP6V0E1  | 0.882 | 19.63  |
| ATP6V0E2  | 5.452 | 0.78   |
| ATP6V1A   | 4.861 | 11.19  |
| ATP6V1B1  | 1.939 | 0      |
| ATP6V1B2  | 3.044 | 22.2   |
| ATP6V1C1  | 5.761 | 1.01   |
| ATP6V1C2  | 3.24  | 3.88   |
| ATP6V1D   | 1.669 | 3.73   |
| ATP6V1E1  | 1.406 | 38.84  |
| ATP6V1E2  | 1.979 | 0.2    |
| ATP6V1F   | 1.382 | 23.34  |
| ATP6V1G1  | 1.611 | 55.21  |
| ATP6V1G2  | 5.742 | 0      |
| ATP6V1G3  | 1.122 | 0      |
| ATP6V1GP2 | 1.006 | 0      |
| ATP6V1H   | 2.27  | 9.89   |
| ATP7A     | 8.03  | 0.63   |
| ATP7B     | 6.642 | 0.07   |
| ATP8      | 0.207 | 0      |
| ATP8A1    | 3.793 | 2.09   |
| ATP8A2    | 3.904 | 1.8    |
| ATP8B1    | 3.891 | 0.05   |
| ATP8B2    | 6.568 | 6.67   |
| ATP8B3    | 5.09  | 0.1    |

|          |        |       |
|----------|--------|-------|
| ATP8B4   | 5.677  | 0.16  |
| ATP9A    | 7.58   | 0.81  |
| ATP9B    | 4.358  | 3.01  |
| ATPAF1   | 1.758  | 2.76  |
| ATPAF2   | 1.552  | 10.77 |
| ATPBD1B  | 1.956  | 10.42 |
| ATPBD1C  | 1.459  | 1.63  |
| ATPBD3   | 1.151  | 0.86  |
| ATPBD4   | 2.094  | 0.38  |
| ATPIF1   | 2.607  | 12.41 |
| ATQL3    | 1.048  | 0     |
| ATQL4    | 0.45   | 0     |
| ATR      | 8.232  | 2.14  |
| ATRN     | 8.87   | 1.11  |
| ATRNL1   | 6.13   | 5.07  |
| ATRX     | 10.758 | 4.16  |
| ATXN1    | 10.636 | 0.17  |
| ATXN10   | 2.963  | 9.31  |
| ATXN2    | 4.702  | 2.38  |
| ATXN2L   | 7.234  | 26.12 |
| ATXN3    | 4.64   | 3.96  |
| ATXN3L   | 1.288  | 0.08  |
| ATXN7    | 5.531  | 11.47 |
| ATXN7L2  | 2.318  | 1.75  |
| ATXN7L4  | 2.94   | 0.13  |
| ATXN8OS  | 1.148  | 0     |
| AUH      | 1.549  | 3     |
| AUP1     | 1.603  | 34.01 |
| AURKA    | 2.817  | 0.18  |
| AURKAIP1 | 0.752  | 25.78 |
| AURKB    | 1.236  | 4.4   |
| AURKC    | 1.513  | 0.52  |
| AUTS2    | 13.054 | 15.93 |
| AVEN     | 1.531  | 1.29  |
| AVIL     | 2.711  | 0.22  |
| AVP      | 0.619  | 0.32  |
| AVPI1    | 1.347  | 0.52  |
| AVPR1A   | 4.154  | 0     |
| AVPR1B   | 2.269  | 0     |
| AVPR2    | 1.804  | 0.88  |
| AXIIR    | 2.393  | 13.11 |
| AXIN1    | 3.448  | 6.05  |
| AXIN2    | 4.259  | 5.9   |
| AXL      | 5.022  | 0.04  |
| AXUD1    | 3.625  | 76.09 |
| AYP1p1   | 1.173  | 0.17  |
| AYTL1    | 1.919  | 1.7   |
| AYTL2    | 3.946  | 3.36  |
| AZGP1    | 2.434  | 1.18  |
| AZI1     | 3.619  | 7.38  |

|             |        |         |
|-------------|--------|---------|
| AZI2        | 3.115  | 4.76    |
| AZIN1       | 4.348  | 19.43   |
| AZU1        | 0.912  | 4.77    |
| B2M         | 0.987  | 1257.51 |
| B3GALNT1    | 3.641  | 0       |
| B3GALNT2    | 2.009  | 0.99    |
| B3GALT1     | 2.168  | 0       |
| B3GALT2     | 3.213  | 0.03    |
| B3GALT4     | 5.058  | 0       |
| B3GALT5     | 3.818  | 0       |
| B3GALT6     | 2.774  | 1.64    |
| B3GALTL     | 3.439  | 0.58    |
| B3GAT1      | 3.805  | 0.23    |
| B3GAT2      | 0.972  | 0       |
| B3GAT3      | 1.704  | 14.81   |
| B3GNT1      | 2.07   | 0.48    |
| B3GNT2      | 2.749  | 18.79   |
| B3GNT3      | 2.72   | 0       |
| B3GNT4      | 1.504  | 0.2     |
| B3GNT5      | 4.123  | 0.6     |
| B3GNT6      | 2.471  | 0       |
| B3GNT7      | 1.434  | 0.42    |
| B3GNT8      | 1.874  | 0.58    |
| B3GNTL1     | 1.383  | 4.15    |
| B4GALNT1    | 3.01   | 0       |
| B4GALNT2    | 1.792  | 0       |
| B4GALNT3    | 3.438  | 0.09    |
| B4GALNT4    | 3.12   | 0.16    |
| B4GALT1     | 5.386  | 64.49   |
| B4GALT2     | 2.313  | 2.69    |
| B4GALT3     | 1.949  | 9.49    |
| B4GALT4     | 2.344  | 8.27    |
| B4GALT5     | 4.645  | 3.48    |
| B4GALT6     | 3.832  | 1.4     |
| B4GALT7     | 1.659  | 5.07    |
| bA16L21.2.1 | 2.472  | 1.76    |
| bA291L22.4  | 2.359  | 0       |
| bA327L3.4   | 1.501  | 31.11   |
| bA345E19.2  | 0.626  | 0.63    |
| BA393J16.4  | 2.344  | 0       |
| bA395L14.12 | 1.012  | 4.11    |
| BA775A3.1   | 0.479  | 0       |
| bA9F11.1    | 0.507  | 0       |
| BAALC       | 6.555  | 24.39   |
| BAAT        | 3.108  | 0       |
| BACE1       | 5.983  | 0.96    |
| BACE2       | 4.22   | 0.03    |
| BACH1       | 6.731  | 7.67    |
| BACH2       | 11.225 | 7.64    |
| BAD         | 1.197  | 8.27    |

|          |        |       |
|----------|--------|-------|
| BAG1     | 3.858  | 5.31  |
| BAG2     | 1.545  | 0.06  |
| BAG3     | 2.571  | 2.15  |
| BAG4     | 2.182  | 3.81  |
| BAG5     | 6.783  | 5.32  |
| BAGE     | 0.967  | 0     |
| BAGE4    | 1.755  | 0.23  |
| BAHCC1   | 10.708 | 0.12  |
| BAHD1    | 4.517  | 3.41  |
| BAI1     | 5.528  | 0.02  |
| BAI2     | 5.399  | 0     |
| BAI3     | 5.218  | 0     |
| BAIAP2   | 4.925  | 0.22  |
| BAIAP2L1 | 4.06   | 0.07  |
| BAIAP2L2 | 2.707  | 5.56  |
| BAIAP3   | 4.523  | 2.52  |
| BAK1     | 2.098  | 15.8  |
| BAMBI    | 1.724  | 0.17  |
| BANF1    | 1.152  | 6.53  |
| BANK1    | 3.239  | 13.9  |
| BANP     | 2.812  | 6.68  |
| BAP1     | 4.08   | 30.8  |
| BAPX1    | 2.165  | 0     |
| BARD1    | 3.477  | 13.97 |
| BARHL1   | 1.907  | 0.05  |
| BARHL2   | 1.496  | 0     |
| BARX1    | 1.482  | 0.13  |
| BARX2    | 1.454  | 0     |
| BASP1    | 1.797  | 4.4   |
| BAT1     | 6.405  | 0.43  |
| BAT2     | 20.793 | 0.2   |
| BAT2D1   | 10.728 | 25.49 |
| BAT3     | 13.001 | 0.15  |
| BAT4     | 5.691  | 0.05  |
| BAT5     | 5.88   | 0.05  |
| BATF     | 0.939  | 1.48  |
| BATF2    | 2.14   | 0     |
| BAX      | 1.799  | 15.79 |
| BAZ1A    | 6.016  | 3.56  |
| BAZ1B    | 15.31  | 1.92  |
| BAZ2A    | 10.772 | 58.32 |
| BAZ2B    | 8.145  | 4.44  |
| BBC3     | 3.736  | 39.93 |
| BBOX1    | 1.584  | 0     |
| BBS1     | 3.37   | 2.91  |
| BBS10    | 3.329  | 0.33  |
| BBS12    | 3.244  | 0.12  |
| BBS2     | 2.963  | 3.27  |
| BBS4     | 2.482  | 0.92  |
| BBS5     | 3.157  | 0.44  |

|           |        |       |
|-----------|--------|-------|
| BBS7      | 4.244  | 0.12  |
| BBS9      | 8.038  | 0.28  |
| BBX       | 4.668  | 7.67  |
| BC37295_3 | 1.68   | 0.12  |
| BCAM      | 3.203  | 1.82  |
| BCAN      | 4.691  | 0     |
| BCAP29    | 17.418 | 3.19  |
| BCAP31    | 1.324  | 21.6  |
| BCAR1     | 3.217  | 0     |
| BCAR3     | 3.171  | 1.12  |
| BCAS1     | 2.816  | 0.04  |
| BCAS2     | 1.304  | 10.77 |
| BCAS3     | 3.496  | 1.56  |
| BCAS4     | 2.034  | 0.83  |
| BCAT1     | 8.191  | 1.11  |
| BCAT2     | 1.58   | 2.13  |
| BCCIP     | 3.261  | 7.07  |
| BCDIN3    | 6.043  | 9.25  |
| BCDO2     | 3.185  | 0.21  |
| BCHE      | 2.443  | 0     |
| BCKDHA    | 1.764  | 10.66 |
| BCKDHB    | 3.996  | 0.25  |
| BCKDK     | 1.83   | 5.68  |
| BCL10     | 2.786  | 4.33  |
| BCL11A    | 14.609 | 16.75 |
| BCL11B    | 7.816  | 0.52  |
| BCL2      | 7.205  | 0.84  |
| BCL2A1    | 0.884  | 4.7   |
| BCL2L1    | 2.934  | 26.67 |
| BCL2L10   | 0.887  | 0.44  |
| BCL2L11   | 10.823 | 7.27  |
| BCL2L12   | 1.855  | 11.84 |
| BCL2L13   | 3.367  | 2.03  |
| BCL2L14   | 3.737  | 0.08  |
| BCL2L2    | 3.54   | 27.92 |
| BCL2L7P1  | 0.636  | 5.92  |
| BCL2L7P2  | 0.632  | 0.16  |
| BCL3      | 1.81   | 13.61 |
| BCL6      | 4.505  | 20.89 |
| BCL6B     | 3.525  | 6.79  |
| BCL7A     | 6.696  | 69.93 |
| BCL7B     | 4.604  | 6.49  |
| BCL7C     | 1.136  | 15.5  |
| BCL9      | 6.278  | 0.28  |
| BCL9L     | 7.536  | 3.4   |
| BCLAF1    | 6.2    | 31.04 |
| BCMO1     | 2.427  | 0     |
| BCOR      | 9.421  | 3.25  |
| BCORL1    | 6.74   | 0.49  |
| BCORL2    | 51.184 | 0.11  |

|          |        |       |
|----------|--------|-------|
| BCR      | 8.218  | 28.05 |
| BCRL4    | 6.52   | 0.03  |
| BCS1L    | 1.584  | 4.37  |
| BCYRN1   | 0.2    | 1.98  |
| BCYRN1P1 | 0.204  | 1.94  |
| BDH1     | 3.689  | 0.72  |
| BDH2     | 2.92   | 3.76  |
| BDH2P1   | 2.9    | 1.19  |
| BDKRB1   | 1.289  | 0.08  |
| BDKRB2   | 4.263  | 1     |
| BDNF     | 6.564  | 0     |
| BDNFOS   | 2.322  | 0.21  |
| BDP1     | 14.404 | 1.31  |
| BECN1    | 2.112  | 23.05 |
| BEST1    | 2.673  | 3.93  |
| BEST2    | 1.846  | 0     |
| BEST3    | 4.611  | 0.09  |
| BEST4    | 2.045  | 0.63  |
| BET1     | 6.122  | 0.2   |
| BET1L    | 2.916  | 19.14 |
| BEX1     | 0.862  | 0     |
| BEX2     | 0.87   | 0.68  |
| BEXL1    | 1.601  | 30.41 |
| BFAR     | 2.53   | 6.18  |
| BFSP1    | 2.167  | 0.04  |
| BFSP2    | 1.626  | 0     |
| BGLAP    | 0.48   | 0.83  |
| BGN      | 2.38   | 0.37  |
| BHLHB2   | 2.919  | 21.86 |
| BHLHB3   | 3.623  | 0.16  |
| BHLHB4   | 0.942  | 0     |
| BHLHB5   | 3.373  | 0     |
| BHLHB8   | 1.437  | 3.78  |
| BHLHB9   | 3.973  | 0     |
| BHMT     | 2.416  | 0     |
| BHMT2    | 2.007  | 0     |
| BIC      | 12.969 | 0.08  |
| BICC1    | 3.119  | 0     |
| BICD1    | 4.541  | 0.57  |
| BICD2    | 8.726  | 8.65  |
| BID      | 2.812  | 2.57  |
| BIK      | 0.95   | 0.11  |
| BIN1     | 3.161  | 10.3  |
| BIN2     | 2.211  | 2.23  |
| BIN3     | 1.797  | 9.41  |
| BIRC2    | 3.743  | 6.35  |
| BIRC3    | 5.342  | 0.82  |
| BIRC4    | 8.413  | 3.33  |
| BIRC5    | 4.871  | 0.84  |
| BIRC6    | 16.069 | 5.04  |

|         |        |        |
|---------|--------|--------|
| BIRC7   | 1.516  | 0      |
| BIRC8   | 2.022  | 0      |
| BIVM    | 3.857  | 0.87   |
| BLCAP   | 2.043  | 32.73  |
| BLK     | 2.59   | 4.44   |
| BLM     | 4.417  | 0.6    |
| BLMH    | 2.417  | 17.03  |
| BLNK    | 1.816  | 9.42   |
| BLOC1S1 | 0.1    | 159.29 |
| BLOC1S2 | 0.1    | 170.17 |
| BLOC1S3 | 0.1    | 11.87  |
| BLR1    | 4.074  | 0.49   |
| BLVRA   | 2.162  | 4.3    |
| BLVRB   | 0.797  | 5.71   |
| BLZF1   | 2.318  | 0.47   |
| BLZF2P  | 3.453  | 0.03   |
| BMF     | 12.999 | 62.86  |
| BMI1    | 3.203  | 3.21   |
| BMP1    | 4.654  | 2.66   |
| BMP10   | 1.584  | 0      |
| BMP15   | 1.179  | 0      |
| BMP2    | 3.15   | 33.7   |
| BMP2K   | 5.75   | 16.16  |
| BMP2KL  | 1.236  | 0.08   |
| BMP3    | 1.774  | 0.22   |
| BMP4    | 2.383  | 0      |
| BMP5    | 2.172  | 0      |
| BMP6    | 2.872  | 0.11   |
| BMP6P1  | 1.647  | 0      |
| BMP7    | 1.879  | 0      |
| BMP8A   | 5.626  | 0.41   |
| BMP8B   | 3.773  | 0.13   |
| BMPER   | 10.064 | 0.01   |
| BMPR1A  | 3.616  | 0.05   |
| BMPR1B  | 2.035  | 0.29   |
| BMPR2   | 11.449 | 1.49   |
| BMS1L   | 4.208  | 7.26   |
| BMX     | 2.623  | 0.04   |
| BNC1    | 4.612  | 0      |
| BNC2    | 12.926 | 0.02   |
| BNIP1   | 1.783  | 2.67   |
| BNIP2   | 2.987  | 27.95  |
| BNIP3   | 1.534  | 3.29   |
| BNIP3L  | 4.058  | 36.3   |
| BNIP3P  | 1.533  | 0.59   |
| BNIPL   | 2.489  | 0      |
| BOAT    | 1.198  | 9.83   |
| BOC     | 4.281  | 2.04   |
| BOK     | 2.601  | 0.04   |
| BOLA1   | 0.808  | 2.57   |

|         |        |       |
|---------|--------|-------|
| BOLA2   | 1.778  | 5.01  |
| BOLA2B  | 1.012  | 8.8   |
| BOLA3   | 0.812  | 2.92  |
| BOLL    | 3.206  | 0     |
| BOP1    | 2.373  | 6.33  |
| BP75    | 0.453  | 0     |
| BPGM    | 5.956  | 0.52  |
| BPHL    | 1.517  | 0.59  |
| BPI     | 1.812  | 2.24  |
| BPIL1   | 1.897  | 0     |
| BPIL2   | 1.524  | 0     |
| BPIL3   | 1.362  | 0     |
| BPNT1   | 2.452  | 0.68  |
| BPTF    | 11.778 | 7.09  |
| BPY2    | 1.206  | 0     |
| BPY2B   | 1.206  | 0     |
| BPY2C   | 1.206  | 0     |
| BRAF    | 5.738  | 4.96  |
| BRAF2   | 0.774  | 1.03  |
| BRAP    | 2.819  | 18.88 |
| BRCA1   | 11.393 | 0.16  |
| BRCA1P1 | 1.686  | 1.65  |
| BRCA2   | 11.386 | 0.6   |
| BRCC2   | 0.862  | 0     |
| BRCC3   | 2.914  | 1.15  |
| BRD1    | 7.122  | 33.48 |
| BRD2    | 14.079 | 0.62  |
| BRD3    | 3.069  | 4.38  |
| BRD4    | 7.957  | 33.97 |
| BRD7    | 2.204  | 6.19  |
| BRD7P   | 2.082  | 0.19  |
| BRD8    | 4.913  | 5.08  |
| BRD9    | 4.061  | 14.21 |
| BRDG1   | 1.506  | 10.51 |
| BRDT    | 3.213  | 0     |
| BRE     | 2.709  | 2.81  |
| BRF1    | 7.157  | 27.28 |
| BRF2    | 1.978  | 5.4   |
| BRI3    | 1.566  | 21.74 |
| BRI3BP  | 1.272  | 1.87  |
| BRIP1   | 4.563  | 0.33  |
| BRMS1   | 2.147  | 10    |
| BRMS1L  | 2.584  | 2.34  |
| BRP44   | 0.789  | 24.58 |
| BRP44L  | 0.962  | 5.56  |
| BRPF1   | 4.857  | 10.43 |
| BRPF3   | 6.019  | 3.21  |
| BRS3    | 1.413  | 0     |
| BRSK1   | 3.108  | 0     |
| BRSK2   | 3.506  | 0.09  |



|         |        |        |
|---------|--------|--------|
| BRUNOL4 | 3.175  | 0      |
| BRUNOL5 | 1.854  | 0      |
| BRUNOL6 | 3.399  | 4.11   |
| BRWD1   | 18.593 | 5.7    |
| BRWD2   | 4.724  | 8.94   |
| BRWD3   | 6.085  | 3.4    |
| BSCL2   | 1.633  | 5.7    |
| BSDC1   | 4.873  | 26.43  |
| BSG     | 2.598  | 26.35  |
| BSN     | 15.955 | 0.01   |
| BSND    | 1.37   | 0      |
| BSPRY   | 2.065  | 3.88   |
| BST1    | 1.411  | 1.33   |
| BST2    | 0.939  | 41.83  |
| BTAf1   | 7.169  | 18.73  |
| BTBD1   | 5.246  | 7.48   |
| BTBD10  | 2.508  | 2.92   |
| BTBD11  | 8.041  | 0.36   |
| BTBD12  | 7.293  | 0.75   |
| BTBD14A | 2.08   | 0.09   |
| BTBD14B | 4.491  | 7.87   |
| BTBD16  | 1.848  | 0      |
| BTBD2   | 2.618  | 22.82  |
| BTBD3   | 5.251  | 10.31  |
| BTBD6   | 1.956  | 15.37  |
| BTBD7   | 9.528  | 1.49   |
| BTBD8   | 1.412  | 0      |
| BTBD9   | 2.208  | 3.18   |
| BTC     | 1.27   | 0      |
| BTD     | 2.065  | 0.76   |
| BTF3    | 1.383  | 248.1  |
| BTF3L1  | 0.636  | 0      |
| BTF3L4  | 2.203  | 7.73   |
| BTF3P1  | 0.52   | 0      |
| BTF3P2  | 0.751  | 4.22   |
| BTG1    | 1.782  | 167.39 |
| BTG2    | 2.712  | 91.53  |
| BTG3    | 1.353  | 9.95   |
| BTG4    | 0.999  | 0      |
| BTK     | 3.014  | 15.2   |
| BTLA    | 1.223  | 0.49   |
| BTN1A1  | 2.902  | 0.07   |
| BTN2A1  | 5.257  | 13.27  |
| BTN2A2  | 3.565  | 7.08   |
| BTN2A3  | 1.761  | 0.57   |
| BTN3A1  | 3.416  | 24.01  |
| BTN3A2  | 3.812  | 5.58   |
| BTN3A3  | 3.287  | 3.46   |
| BTNL2   | 4.104  | 0      |
| BTNL3   | 2.693  | 0      |

|           |        |        |
|-----------|--------|--------|
| BTNL8     | 2.147  | 0.05   |
| BTNL9     | 5.292  | 42.87  |
| BTRC      | 6.121  | 2.33   |
| BUB1      | 3.482  | 0.85   |
| BUB1B     | 3.714  | 2.91   |
| BUB3      | 2.968  | 14.13  |
| BUD13     | 2.193  | 4.11   |
| BUD31     | 2.588  | 10.94  |
| BVES      | 5.583  | 0.11   |
| BXDC1     | 0.949  | 4.48   |
| BXDC2     | 1.273  | 6.91   |
| BXDC5     | 1.268  | 10.69  |
| BYSL      | 1.99   | 2.34   |
| BZRAP1    | 8.638  | 15.46  |
| BZRPL1    | 0.958  | 0      |
| BZW1      | 2.798  | 11.28  |
| BZW2      | 3.712  | 7.6    |
| C10orf10  | 1.987  | 151.62 |
| C10orf104 | 3.195  | 9.23   |
| C10orf107 | 1.262  | 0      |
| C10orf108 | 2.249  | 0.36   |
| C10orf11  | 0.896  | 0      |
| C10orf110 | 0.893  | 20.17  |
| C10orf111 | 1.714  | 0      |
| C10orf112 | 3.811  | 0      |
| C10orf113 | 0.518  | 0      |
| C10orf114 | 1.967  | 0.1    |
| C10orf115 | 0.634  | 0      |
| C10orf116 | 0.672  | 0      |
| C10orf118 | 6.574  | 11.28  |
| C10orf119 | 4.113  | 5.15   |
| C10orf12  | 4.545  | 2.46   |
| C10orf120 | 1.064  | 0      |
| C10orf125 | 0.762  | 1.56   |
| C10orf128 | 4.316  | 0.39   |
| C10orf129 | 2.307  | 0      |
| C10orf130 | 2.467  | 0.04   |
| C10orf132 | 2.894  | 0.04   |
| C10orf136 | 1.121  | 0      |
| C10orf137 | 4.579  | 1.47   |
| C10orf18  | 10.129 | 10.26  |
| C10orf22  | 3.724  | 3.72   |
| C10orf25  | 3.078  | 0.77   |
| C10orf26  | 3.403  | 1.02   |
| C10orf27  | 1.583  | 0      |
| C10orf28  | 3.315  | 10.24  |
| C10orf30  | 2.239  | 0      |
| C10orf31  | 1.603  | 1.79   |
| C10orf32  | 0.838  | 10.15  |
| C10orf33  | 2.026  | 1.66   |

|          |       |       |
|----------|-------|-------|
| C10orf35 | 1.062 | 0     |
| C10orf37 | 1.27  | 0.39  |
| C10orf38 | 4.654 | 72.54 |
| C10orf39 | 5.006 | 0.04  |
| C10orf4  | 5.432 | 1.48  |
| C10orf46 | 5.49  | 11.31 |
| C10orf47 | 3.333 | 0.29  |
| C10orf49 | 0.826 | 0     |
| C10orf51 | 0.867 | 0.23  |
| C10orf53 | 2.09  | 0     |
| C10orf54 | 4.981 | 27.89 |
| C10orf55 | 2.151 | 0.23  |
| C10orf56 | 4.933 | 0.16  |
| C10orf57 | 2.036 | 0.59  |
| C10orf58 | 1.686 | 6.11  |
| C10orf59 | 2.677 | 0     |
| C10orf6  | 7.284 | 1.9   |
| C10orf61 | 3.629 | 1.53  |
| C10orf62 | 1.208 | 0     |
| C10orf63 | 3.318 | 0     |
| C10orf64 | 3.669 | 5.53  |
| C10orf65 | 2.47  | 0     |
| C10orf67 | 2.943 | 0     |
| C10orf68 | 2.717 | 0.59  |
| C10orf71 | 2.97  | 0     |
| C10orf72 | 4.606 | 1.68  |
| C10orf73 | 1.425 | 0     |
| C10orf75 | 1.007 | 0.2   |
| C10orf76 | 2.73  | 5.83  |
| C10orf78 | 1.651 | 0.72  |
| C10orf79 | 5.365 | 0     |
| C10orf80 | 3.313 | 0.27  |
| C10orf81 | 3.249 | 0.06  |
| C10orf82 | 0.994 | 0     |
| C10orf83 | 2.315 | 0     |
| C10orf84 | 2.745 | 5.55  |
| C10orf85 | 2.168 | 0     |
| C10orf88 | 2.334 | 0     |
| C10orf89 | 1.705 | 1.05  |
| C10orf90 | 3.083 | 0     |
| C10orf91 | 0.738 | 0     |
| C10orf92 | 2.746 | 0     |
| C10orf93 | 1.56  | 0.12  |
| C10orf95 | 1.469 | 0.07  |
| C10orf96 | 1.699 | 0     |
| C10orf97 | 2.899 | 8.57  |
| C10orf99 | 0.804 | 0     |
| C11orf1  | 2.568 | 1.19  |
| C11orf10 | 0.408 | 63.05 |
| C11orf16 | 1.893 | 0     |

|          |       |       |
|----------|-------|-------|
| C11orf17 | 1.962 | 2.87  |
| C11orf2  | 2.51  | 71.59 |
| C11orf21 | 0.684 | 1.16  |
| C11orf24 | 2.05  | 1.69  |
| C11orf30 | 5.511 | 2.39  |
| C11orf31 | 1.612 | 22.96 |
| C11orf34 | 0.895 | 0     |
| C11orf35 | 2.091 | 1.61  |
| C11orf36 | 1.818 | 0     |
| C11orf37 | 2.715 | 0.04  |
| C11orf38 | 1.64  | 0     |
| C11orf39 | 4.004 | 0     |
| C11orf40 | 0.654 | 0     |
| C11orf42 | 1.14  | 0     |
| C11orf44 | 3.547 | 0     |
| C11orf45 | 3.624 | 0     |
| C11orf46 | 1.77  | 7.44  |
| C11orf47 | 3.205 | 1.82  |
| C11orf48 | 1.32  | 4.95  |
| C11orf49 | 3.314 | 1.19  |
| C11orf51 | 0.884 | 22.83 |
| C11orf52 | 1.104 | 0     |
| C11orf53 | 1.052 | 0     |
| C11orf54 | 2.39  | 1.49  |
| C11orf55 | 2.738 | 0.29  |
| C11orf56 | 3.413 | 4.29  |
| C11orf57 | 3.739 | 5.48  |
| C11orf58 | 2.027 | 34.17 |
| C11orf59 | 1.068 | 31.4  |
| C11orf60 | 1.819 | 2.34  |
| C11orf61 | 2.225 | 1.07  |
| C11orf63 | 3.615 | 0.13  |
| C11orf64 | 0.734 | 0     |
| C11orf65 | 2.713 | 0.22  |
| C11orf66 | 1.531 | 1.74  |
| C11orf67 | 0.504 | 3.54  |
| C11orf68 | 1.557 | 8.39  |
| C11orf69 | 1.672 | 0     |
| C11orf70 | 1.261 | 0     |
| C11orf71 | 1.441 | 1.72  |
| C11orf72 | 2.431 | 0     |
| C11orf73 | 1.102 | 1.7   |
| C11orf74 | 0.82  | 2.9   |
| C11orf75 | 0.948 | 3.55  |
| C11orf76 | 1.683 | 0     |
| C11orf77 | 1.967 | 1.56  |
| C11orf79 | 1.209 | 14.81 |
| C11orf9  | 5.745 | 0.17  |
| C12orf10 | 1.2   | 18.14 |
| C12orf11 | 2.635 | 5.22  |

|          |       |        |
|----------|-------|--------|
| C12orf12 | 2.962 | 0      |
| C12orf23 | 3.478 | 36.89  |
| C12orf24 | 1.486 | 0.93   |
| C12orf25 | 2.876 | 0.2    |
| C12orf26 | 1.975 | 0.2    |
| C12orf28 | 1.237 | 0      |
| C12orf29 | 2.874 | 1.21   |
| C12orf30 | 5.781 | 7.7    |
| C12orf31 | 1.224 | 19.32  |
| C12orf32 | 1.862 | 2.92   |
| C12orf33 | 2.21  | 0      |
| C12orf34 | 2.731 | 0.04   |
| C12orf35 | 6.534 | 9.15   |
| C12orf36 | 2.75  | 0      |
| C12orf37 | 1.378 | 0      |
| C12orf38 | 2.879 | 0.68   |
| C12orf39 | 0.583 | 0      |
| C12orf4  | 3.819 | 2.04   |
| C12orf40 | 2.789 | 0      |
| C12orf41 | 2.15  | 13.71  |
| C12orf42 | 1.336 | 0      |
| C12orf43 | 1.92  | 4.02   |
| C12orf44 | 1.389 | 23.51  |
| C12orf45 | 0.598 | 6.45   |
| C12orf46 | 1.526 | 0.71   |
| C12orf47 | 2.285 | 18.49  |
| C12orf48 | 3.189 | 0.19   |
| C12orf49 | 2.775 | 4.24   |
| C12orf5  | 1.361 | 2.84   |
| C12orf50 | 1.705 | 0      |
| C12orf51 | 2.694 | 0.92   |
| C12orf52 | 1.775 | 1.89   |
| C12orf53 | 2.17  | 0.13   |
| C12orf54 | 0.685 | 0      |
| C12orf55 | 2.343 | 0      |
| C12orf56 | 1.589 | 0      |
| C12orf57 | 0.829 | 104.67 |
| C12orf59 | 2.709 | 0.04   |
| C12orf60 | 1.123 | 0      |
| C12orf61 | 1.684 | 0.29   |
| C12orf62 | 0.601 | 19.92  |
| C12orf63 | 3.686 | 0      |
| C12orf64 | 2.36  | 0      |
| C12orf65 | 2.073 | 4.2    |
| C13orf1  | 3.053 | 0.26   |
| C13orf16 | 0.709 | 3.63   |
| C13orf18 | 2.494 | 1.71   |
| C13orf21 | 0.784 | 0      |
| C13orf23 | 5.142 | 14.8   |
| C13orf24 | 3.114 | 1.49   |

|           |       |       |
|-----------|-------|-------|
| C13orf26  | 0.998 | 0     |
| C13orf27  | 1.147 | 0.52  |
| C13orf28  | 0.757 | 0     |
| C13orf29  | 6.267 | 0     |
| C13orf3   | 2.888 | 0.2   |
| C13orf30  | 3.241 | 0     |
| C13orf31  | 2.469 | 0.56  |
| C13orf33  | 2.343 | 0     |
| C13orf34  | 2.773 | 1.07  |
| C13orf7   | 3.534 | 2.36  |
| C13orf8   | 3.762 | 3.13  |
| C14orf1   | 2.263 | 3.72  |
| C14orf100 | 1.665 | 3.56  |
| C14orf101 | 4.264 | 0.65  |
| C14orf102 | 4.351 | 2.5   |
| C14orf103 | 5.566 | 9.53  |
| C14orf104 | 1.748 | 0.96  |
| C14orf105 | 2.506 | 0     |
| C14orf106 | 5.547 | 27.99 |
| C14orf108 | 3.069 | 6.64  |
| C14orf11  | 1.321 | 30.71 |
| C14orf112 | 0.68  | 11.93 |
| C14orf115 | 3.369 | 0     |
| C14orf118 | 4.087 | 12.27 |
| C14orf119 | 2.84  | 3.45  |
| C14orf121 | 4.604 | 0.84  |
| C14orf122 | 0.835 | 2.49  |
| C14orf124 | 1.783 | 46.33 |
| C14orf126 | 2.681 | 0.33  |
| C14orf129 | 2.072 | 0.76  |
| C14orf130 | 3.994 | 3.37  |
| C14orf131 | 1.77  | 8.44  |
| C14orf132 | 7.478 | 1.15  |
| C14orf133 | 2.761 | 4.48  |
| C14orf135 | 2.653 | 0.6   |
| C14orf138 | 1.767 | 7.34  |
| C14orf139 | 4.638 | 17.28 |
| C14orf140 | 2.02  | 0.15  |
| C14orf142 | 1.156 | 0.43  |
| C14orf143 | 2.421 | 0.04  |
| C14orf145 | 4.454 | 0.44  |
| C14orf147 | 2.62  | 1.82  |
| C14orf148 | 0.753 | 0.27  |
| C14orf149 | 1.381 | 2.29  |
| C14orf151 | 1.689 | 3.51  |
| C14orf152 | 1.806 | 0     |
| C14orf153 | 2.491 | 1.43  |
| C14orf155 | 2.915 | 0     |
| C14orf156 | 0.387 | 17.38 |
| C14orf159 | 2.973 | 4.29  |

|            |        |       |
|------------|--------|-------|
| C14orf161  | 3.606  | 0     |
| C14orf162  | 1.339  | 0     |
| C14orf165  | 0.93   | 0     |
| C14orf166  | 1.079  | 53.64 |
| C14orf166B | 1.88   | 0     |
| C14orf169  | 2.428  | 2.44  |
| C14orf172  | 1.714  | 3.75  |
| C14orf173  | 3.82   | 10.83 |
| C14orf174  | 2.025  | 0     |
| C14orf177  | 1.283  | 0     |
| C14orf178  | 0.891  | 0     |
| C14orf179  | 0.816  | 1.82  |
| C14orf19   | 0.575  | 4.65  |
| C14orf2    | 0.613  | 62.46 |
| C14orf21   | 2.047  | 5.61  |
| C14orf24   | 2.863  | 1.25  |
| C14orf25   | 1.899  | 0     |
| C14orf28   | 2.906  | 0.65  |
| C14orf29   | 1.699  | 0.12  |
| C14orf32   | 6.469  | 21.92 |
| C14orf37   | 3.082  | 0     |
| C14orf39   | 2.747  | 0     |
| C14orf4    | 4.149  | 10.11 |
| C14orf43   | 8.091  | 24.57 |
| C14orf44   | 2.304  | 0.21  |
| C14orf45   | 2.139  | 0.65  |
| C14orf48   | 1.275  | 0     |
| C14orf49   | 3.868  | 14.12 |
| C14orf50   | 1.405  | 0.28  |
| C14orf54   | 1.754  | 0     |
| C14orf55   | 4.009  | 0     |
| C14orf58   | 3.6    | 0.28  |
| C14orf68   | 1.733  | 0     |
| C14orf70   | 1.627  | 0     |
| C14orf72   | 0.791  | 3.38  |
| C14orf73   | 2.532  | 0.08  |
| C14orf78   | 15.958 | 0.04  |
| C14orf79   | 1.72   | 0.35  |
| C14orf8    | 0.681  | 0     |
| C14orf80   | 1.358  | 0.8   |
| C14orf82   | 2.375  | 0     |
| C14orf83   | 2.812  | 0.07  |
| C14orf85   | 4.701  | 0     |
| C14orf93   | 2.352  | 4.42  |
| C14orf94   | 1.599  | 14.23 |
| C15orf15   | 1.473  | 40.3  |
| C15orf17   | 2.288  | 3.29  |
| C15orf2    | 3.471  | 0     |
| C15orf21   | 3.117  | 0.04  |
| C15orf23   | 1.054  | 1.13  |

|          |        |       |
|----------|--------|-------|
| C15orf24 | 1.054  | 34.55 |
| C15orf26 | 2.099  | 0.04  |
| C15orf27 | 2.292  | 0.04  |
| C15orf28 | 3.281  | 1     |
| C15orf29 | 2.666  | 0.6   |
| C15orf32 | 1.726  | 0     |
| C15orf33 | 1.989  | 0     |
| C15orf34 | 1.562  | 0     |
| C15orf37 | 2.082  | 2.94  |
| C15orf38 | 1.968  | 0.4   |
| C15orf39 | 3.751  | 10.28 |
| C15orf40 | 1.406  | 3.24  |
| C15orf41 | 2.593  | 0.23  |
| C15orf42 | 3.158  | 0.69  |
| C15orf43 | 1.275  | 0     |
| C15orf44 | 2.523  | 9.96  |
| C15orf45 | 1.787  | 0     |
| C15orf48 | 1.035  | 0     |
| C15orf49 | 0.1    | 0     |
| C15orf5  | 1.512  | 0.33  |
| C15orf51 | 3.831  | 0.93  |
| C16orf14 | 0.91   | 0.87  |
| C16orf24 | 0.858  | 2.2   |
| C16orf28 | 2.761  | 9.31  |
| C16orf3  | 0.994  | 0.9   |
| C16orf30 | 3.516  | 19.56 |
| C16orf33 | 1.673  | 1.6   |
| C16orf35 | 2.752  | 6.54  |
| C16orf42 | 1.204  | 10.11 |
| C16orf44 | 2.169  | 11.86 |
| C16orf45 | 2.032  | 5.31  |
| C16orf46 | 1.553  | 0     |
| C16orf47 | 1.307  | 0     |
| C16orf48 | 1.538  | 3.8   |
| C16orf5  | 2.755  | 1.48  |
| C16orf53 | 1.143  | 3.03  |
| C16orf54 | 2.581  | 8.36  |
| C16orf55 | 2.19   | 0.68  |
| C16orf57 | 2.254  | 1.76  |
| C16orf58 | 2.76   | 19.64 |
| C16orf59 | 1.628  | 0.3   |
| C16orf61 | 0.718  | 9.64  |
| C16orf63 | 2.25   | 4.49  |
| C16orf65 | 1.028  | 0.1   |
| C16orf68 | 1.57   | 3.4   |
| C16orf69 | 2.097  | 3.68  |
| C16orf7  | 3.204  | 6.6   |
| C16orf70 | 2.841  | 3.69  |
| C16orf71 | 2.706  | 0.26  |
| C16orf72 | 11.537 | 29.44 |



|          |       |        |
|----------|-------|--------|
| C16orf73 | 1.317 | 0      |
| C16orf74 | 0.447 | 0.44   |
| C16orf75 | 1.432 | 0.69   |
| C16orf77 | 1.606 | 0.25   |
| C16orf78 | 0.973 | 0      |
| C16orf79 | 0.973 | 1.01   |
| C16orf80 | 1.292 | 14.63  |
| C16orf81 | 0.489 | 0.2    |
| C17orf25 | 1.792 | 5.14   |
| C17orf28 | 3.258 | 0      |
| C17orf32 | 1.449 | 8.47   |
| C17orf37 | 0.754 | 20.86  |
| C17orf38 | 2.264 | 1.62   |
| C17orf39 | 4.232 | 0.79   |
| C17orf42 | 1.659 | 1.85   |
| C17orf45 | 1.304 | 519.72 |
| C17orf46 | 1.284 | 0      |
| C17orf47 | 2.077 | 0.04   |
| C17orf48 | 1.518 | 31.29  |
| C17orf49 | 0.827 | 44.02  |
| C17orf50 | 1.014 | 0.29   |
| C17orf51 | 5.654 | 0      |
| C17orf53 | 2.672 | 1.26   |
| C17orf54 | 1.667 | 0      |
| C17orf55 | 2.97  | 0.04   |
| C17orf56 | 2.601 | 13.39  |
| C17orf57 | 3.931 | 0.98   |
| C17orf58 | 2.708 | 0.04   |
| C17orf59 | 1.74  | 7.16   |
| C17orf60 | 1.331 | 6.17   |
| C17orf61 | 0.448 | 32.68  |
| C17orf62 | 4.395 | 13.96  |
| C17orf63 | 3.432 | 2.04   |
| C17orf64 | 0.928 | 0.11   |
| C17orf65 | 2.413 | 22.71  |
| C17orf66 | 1.969 | 0.05   |
| C17orf67 | 0.372 | 0      |
| C17orf68 | 4.658 | 10.94  |
| C17orf69 | 1.219 | 0      |
| C17orf70 | 3.821 | 4.35   |
| C17orf71 | 3.234 | 5.17   |
| C17orf73 | 2.762 | 0      |
| C17orf74 | 1.65  | 0      |
| C17orf75 | 1.623 | 3.78   |
| C17orf76 | 2.353 | 0.08   |
| C17orf77 | 2.525 | 0      |
| C17orf78 | 1.862 | 0      |
| C17orf79 | 0.855 | 6.02   |
| C17orf80 | 2.127 | 1.48   |
| C17orf81 | 3.302 | 5.46   |

|          |        |       |
|----------|--------|-------|
| C17orf82 | 1.53   | 0     |
| C17orf83 | 1.644  | 0     |
| C17orf85 | 2.708  | 5.88  |
| C18orf1  | 30.627 | 11.5  |
| C18orf10 | 2.065  | 10.11 |
| C18orf16 | 2.392  | 0     |
| C18orf17 | 3.505  | 8.5   |
| C18orf19 | 1.941  | 1.53  |
| C18orf2  | 1.328  | 0     |
| C18orf20 | 0.873  | 0     |
| C18orf21 | 1.039  | 8.67  |
| C18orf22 | 1.407  | 9.21  |
| C18orf24 | 3.091  | 0.58  |
| C18orf25 | 5.424  | 9.58  |
| C18orf26 | 2.027  | 0     |
| C18orf34 | 3.087  | 0     |
| C18orf37 | 0.974  | 5.89  |
| C18orf45 | 2.941  | 0.7   |
| C18orf51 | 2.053  | 0     |
| C18orf54 | 5.007  | 0.14  |
| C18orf55 | 1.319  | 2.33  |
| C18orf56 | 0.844  | 0.23  |
| C18orf58 | 2.346  | 0     |
| C18orf8  | 2.173  | 11.34 |
| C19orf10 | 1.051  | 17.61 |
| C19orf12 | 3.396  | 2.24  |
| C19orf15 | 3.5    | 0.22  |
| C19orf16 | 2.282  | 0     |
| C19orf18 | 0.917  | 0.65  |
| C19orf19 | 1.59   | 0     |
| C19orf2  | 2.425  | 3.75  |
| C19orf20 | 1.919  | 4.12  |
| C19orf21 | 2.851  | 0.18  |
| C19orf22 | 2.632  | 35.53 |
| C19orf23 | 1.356  | 4.52  |
| C19orf24 | 1.041  | 7.51  |
| C19orf25 | 2.131  | 2.28  |
| C19orf26 | 2.407  | 0     |
| C19orf28 | 3.043  | 15.71 |
| C19orf29 | 3.625  | 7.39  |
| C19orf30 | 0.696  | 0     |
| C19orf31 | 2.278  | 3.52  |
| C19orf33 | 0.461  | 0.21  |
| C19orf34 | 1.264  | 0.47  |
| C19orf35 | 2.564  | 1.39  |
| C19orf36 | 1.015  | 1.75  |
| C19orf39 | 1.662  | 0.6   |
| C19orf4  | 1.562  | 0.06  |
| C19orf40 | 1.122  | 0.79  |
| C19orf41 | 0.814  | 0     |

|           |       |        |
|-----------|-------|--------|
| C19orf42  | 1.145 | 2.76   |
| C19orf43  | 1.297 | 157.83 |
| C19orf44  | 3.325 | 0.84   |
| C19orf45  | 1.639 | 0.12   |
| C19orf46  | 1.541 | 0.2    |
| C19orf47  | 2.126 | 2.14   |
| C19orf48  | 1.811 | 17.04  |
| C19orf49  | 0.804 | 4.8    |
| C19orf50  | 1.42  | 26.33  |
| C19orf51  | 3.174 | 0.04   |
| C19orf52  | 1.397 | 8.64   |
| C19orf53  | 0.568 | 52.96  |
| C19orf54  | 1.736 | 3.08   |
| C19orf55  | 2.147 | 1.06   |
| C19orf56  | 0.839 | 29.6   |
| C19orf57  | 2.42  | 0.49   |
| C19orf58  | 1.055 | 16.78  |
| C19orf59  | 2.373 | 7.88   |
| C19orf6   | 4.378 | 72.36  |
| C19orf7   | 6.116 | 9.48   |
| C1D       | 1.215 | 2.36   |
| C1GALT1   | 3.554 | 0.81   |
| C1GALT1C1 | 1.838 | 0.92   |
| C1orf100  | 0.579 | 0      |
| C1orf101  | 3.019 | 0      |
| C1orf102  | 1.662 | 0.89   |
| C1orf103  | 3.932 | 1.66   |
| C1orf104  | 1.306 | 1.29   |
| C1orf105  | 0.98  | 0      |
| C1orf106  | 4.098 | 0      |
| C1orf107  | 8.463 | 0.37   |
| C1orf108  | 1.967 | 26.41  |
| C1orf109  | 2.355 | 0.54   |
| C1orf110  | 2.605 | 0      |
| C1orf111  | 0.888 | 0.12   |
| C1orf112  | 3.363 | 0.29   |
| C1orf113  | 3.182 | 1.43   |
| C1orf114  | 1.866 | 0      |
| C1orf115  | 2.934 | 0      |
| C1orf116  | 5.49  | 0.02   |
| C1orf117  | 1.669 | 0      |
| C1orf118  | 2.261 | 0.04   |
| C1orf119  | 2.75  | 17.95  |
| C1orf120  | 0.74  | 0      |
| C1orf121  | 4.071 | 4.11   |
| C1orf122  | 0.822 | 6.62   |
| C1orf123  | 1.085 | 6.83   |
| C1orf124  | 5.74  | 0.9    |
| C1orf125  | 3.382 | 0      |
| C1orf126  | 2.962 | 0      |

|          |       |       |
|----------|-------|-------|
| C1orf127 | 2.262 | 0     |
| C1orf128 | 1.615 | 18.5  |
| C1orf129 | 2.223 | 0     |
| C1orf130 | 3.583 | 0     |
| C1orf131 | 1.435 | 1.45  |
| C1orf133 | 3.505 | 0     |
| C1orf135 | 2.061 | 0.1   |
| C1orf137 | 0.386 | 0     |
| C1orf138 | 1.914 | 2.02  |
| C1orf14  | 2.365 | 0     |
| C1orf140 | 4.492 | 0     |
| C1orf141 | 2.143 | 0     |
| C1orf142 | 3.239 | 24.47 |
| C1orf144 | 2.677 | 61.72 |
| C1orf145 | 2.889 | 0     |
| C1orf146 | 0.751 | 0     |
| C1orf147 | 2.096 | 0     |
| C1orf149 | 2.147 | 4.28  |
| C1orf150 | 2.628 | 0     |
| C1orf151 | 2.875 | 3.31  |
| C1orf156 | 1.445 | 0.55  |
| C1orf157 | 1.891 | 0     |
| C1orf158 | 1.019 | 0     |
| C1orf159 | 3.214 | 1.94  |
| C1orf160 | 1.528 | 13.86 |
| C1orf161 | 3.229 | 0     |
| C1orf162 | 0.917 | 3.99  |
| C1orf163 | 1.614 | 2.14  |
| C1orf164 | 3.439 | 13.84 |
| C1orf165 | 2.069 | 9.71  |
| C1orf166 | 2.436 | 8.16  |
| C1orf167 | 5.515 | 0.51  |
| C1orf168 | 3.134 | 0     |
| C1orf170 | 3.064 | 0     |
| C1orf172 | 1.785 | 0     |
| C1orf173 | 7.159 | 0.02  |
| C1orf174 | 1.658 | 5.91  |
| C1orf175 | 4.349 | 0.03  |
| C1orf176 | 2.217 | 2.76  |
| C1orf177 | 1.777 | 0     |
| C1orf178 | 0.904 | 0.22  |
| C1orf179 | 1.975 | 0     |
| C1orf180 | 2.884 | 0     |
| C1orf181 | 2.797 | 5.48  |
| C1orf182 | 0.753 | 0     |
| C1orf183 | 2.369 | 0.34  |
| C1orf184 | 0.846 | 0     |
| C1orf185 | 0.911 | 0     |
| C1orf186 | 1.665 | 0.06  |
| C1orf187 | 1.773 | 0     |

|          |        |        |
|----------|--------|--------|
| C1orf189 | 0.387  | 0      |
| C1orf19  | 1.925  | 6.89   |
| C1orf190 | 2.08   | 0.48   |
| C1orf191 | 1.027  | 0.2    |
| C1orf192 | 0.774  | 0.76   |
| C1orf194 | 0.731  | 0.14   |
| C1orf198 | 3.735  | 0.05   |
| C1orf2   | 3.19   | 3.75   |
| C1orf201 | 2.501  | 0.16   |
| C1orf21  | 10.308 | 0.64   |
| C1orf210 | 1.467  | 0      |
| C1orf211 | 1.265  | 0.08   |
| C1orf212 | 2.53   | 8.96   |
| C1orf213 | 3.377  | 1.56   |
| C1orf215 | 1.783  | 0.72   |
| C1orf25  | 4.359  | 0.61   |
| C1orf26  | 3.753  | 1.32   |
| C1orf27  | 3.784  | 5.91   |
| C1orf31  | 0.641  | 3.4    |
| C1orf32  | 2.572  | 0.12   |
| C1orf34  | 8.621  | 0.04   |
| C1orf35  | 1.29   | 9.51   |
| C1orf38  | 3.69   | 105.83 |
| C1orf41  | 0.582  | 7.31   |
| C1orf43  | 2.741  | 39.45  |
| C1orf49  | 1.025  | 0.29   |
| C1orf50  | 0.989  | 4.1    |
| C1orf51  | 1.742  | 0.12   |
| C1orf52  | 1.532  | 13.56  |
| C1orf53  | 0.588  | 0      |
| C1orf54  | 0.504  | 20.81  |
| C1orf55  | 3.934  | 18.71  |
| C1orf56  | 2.053  | 4.34   |
| C1orf57  | 0.902  | 6.8    |
| C1orf58  | 1.682  | 6.65   |
| C1orf59  | 1.867  | 1.54   |
| C1orf61  | 0.879  | 0      |
| C1orf62  | 3.05   | 0.04   |
| C1orf63  | 2.198  | 33.31  |
| C1orf64  | 0.921  | 0      |
| C1orf65  | 2.045  | 0      |
| C1orf66  | 2.243  | 1.24   |
| C1orf67  | 2.243  | 0      |
| C1orf69  | 8.15   | 7.69   |
| C1orf70  | 0.522  | 0.19   |
| C1orf71  | 3.608  | 7.1    |
| C1orf74  | 1.561  | 0.76   |
| C1orf75  | 2.475  | 0.32   |
| C1orf76  | 2.909  | 0      |
| C1orf77  | 3.123  | 27.15  |

|          |       |        |
|----------|-------|--------|
| C1orf78  | 1.054 | 5.25   |
| C1orf80  | 2.485 | 0.8    |
| C1orf82  | 3.026 | 2.91   |
| C1orf83  | 4.097 | 0.27   |
| C1orf84  | 7.861 | 0.52   |
| C1orf85  | 1.585 | 4.68   |
| C1orf86  | 2.216 | 5.27   |
| C1orf87  | 2.012 | 0      |
| C1orf88  | 2.289 | 0.13   |
| C1orf89  | 1.334 | 0.82   |
| C1orf9   | 6.327 | 4.47   |
| C1orf90  | 0.936 | 0.52   |
| C1orf91  | 1.866 | 2.92   |
| C1orf92  | 1.907 | 0.26   |
| C1orf93  | 2.709 | 3.32   |
| C1orf94  | 2.287 | 0      |
| C1orf95  | 4.093 | 0      |
| C1orf96  | 5.161 | 2.64   |
| C1orf97  | 0.694 | 0      |
| C1orf99  | 2.396 | 0      |
| C1QA     | 1.098 | 0.54   |
| C1QB     | 1.044 | 1.04   |
| C1QBP    | 1.163 | 38.45  |
| C1QBPP   | 1.006 | 0.59   |
| C1QC     | 1.139 | 0.26   |
| C1QDC1   | 6.007 | 0.28   |
| C1QDC2   | 1.036 | 1.43   |
| C1QL1    | 1.5   | 0.13   |
| C1QL2    | 2.049 | 0      |
| C1QL3    | 2.493 | 0      |
| C1QL4    | 2.065 | 0      |
| C1QTNF1  | 3.17  | 3.72   |
| C1QTNF2  | 2.392 | 0.33   |
| C1QTNF3  | 3.856 | 1.05   |
| C1QTNF4  | 1.364 | 112.58 |
| C1QTNF5  | 1.341 | 0      |
| C1QTNF6  | 3.674 | 0.68   |
| C1QTNF7  | 3.942 | 0      |
| C1QTNF8  | 2.974 | 0      |
| C1QTNF9  | 1.826 | 0.11   |
| C1R      | 1.096 | 3.8    |
| C1RL     | 3.319 | 2.84   |
| C1S      | 3.009 | 2.46   |
| C2       | 7.827 | 0.14   |
| C2orf10  | 0.981 | 0.1    |
| C2orf100 | 2.519 | 0.31   |
| C2orf102 | 1.952 | 0      |
| C2orf103 | 1.776 | 0      |
| C2orf106 | 0.905 | 5.8    |
| C2orf107 | 0.694 | 1.85   |

|          |       |        |
|----------|-------|--------|
| C2orf108 | 3.034 | 4.66   |
| C2orf11  | 4.427 | 16.41  |
| C2orf111 | 3.841 | 44.09  |
| C2orf112 | 4.335 | 12.03  |
| C2orf114 | 1.727 | 0      |
| C2orf116 | 1.254 | 12.15  |
| C2orf117 | 3.71  | 1.01   |
| C2orf118 | 2.041 | 0.53   |
| C2orf119 | 2.129 | 1.35   |
| C2orf12  | 3.291 | 0.33   |
| C2orf121 | 6.215 | 1      |
| C2orf123 | 1.96  | 0      |
| C2orf132 | 3.784 | 0.13   |
| C2orf133 | 5.513 | 4.6    |
| C2orf134 | 2.028 | 0      |
| C2orf135 | 1.776 | 0.84   |
| C2orf141 | 0.727 | 0      |
| C2orf142 | 0.958 | 0.41   |
| C2orf144 | 0.541 | 0      |
| C2orf149 | 0.777 | 125.68 |
| C2orf151 | 2.793 | 0      |
| C2orf152 | 3.318 | 22.3   |
| C2orf160 | 2.523 | 0      |
| C2orf165 | 0.719 | 0.13   |
| C2orf166 | 1.213 | 0      |
| C2orf173 | 1.034 | 0      |
| C2orf174 | 6.327 | 0.52   |
| C2orf175 | 2.698 | 0.04   |
| C2orf177 | 3.808 | 0.86   |
| C2orf179 | 0.761 | 0      |
| C2orf185 | 1.454 | 0      |
| C2orf186 | 2.042 | 0      |
| C2orf189 | 0.183 | 0      |
| C2orf19  | 2.129 | 3.63   |
| C2orf191 | 0.476 | 0      |
| C2orf195 | 1.112 | 0.18   |
| C2orf196 | 1.154 | 1.72   |
| C2orf197 | 2.732 | 0      |
| C2orf198 | 2.532 | 4.03   |
| C2orf20  | 1.603 | 2.9    |
| C2orf23  | 5.261 | 2.65   |
| C2orf24  | 1.632 | 15.22  |
| C2orf26  | 4.082 | 0      |
| C2orf27  | 1.376 | 45.37  |
| C2orf28  | 1.585 | 0.12   |
| C2orf29  | 1.832 | 1.89   |
| C2orf3   | 2.221 | 10.51  |
| C2orf30  | 2.508 | 4.58   |
| C2orf32  | 2.545 | 0.66   |
| C2orf39  | 2.437 | 0.52   |

|           |       |       |
|-----------|-------|-------|
| C20orf4   | 2.647 | 8.3   |
| C20orf42  | 5.151 | 0.05  |
| C20orf43  | 1.607 | 45.99 |
| C20orf44  | 3.974 | 1.67  |
| C20orf46  | 1.72  | 0.05  |
| C20orf51  | 1.631 | 0     |
| C20orf52  | 0.477 | 32.15 |
| C20orf54  | 2.598 | 0.08  |
| C20orf55  | 1.748 | 4.7   |
| C20orf56  | 4.547 | 0     |
| C20orf58  | 1.425 | 0     |
| C20orf59  | 3.628 | 23.67 |
| C20orf62  | 0.7   | 0     |
| C20orf67  | 2.885 | 22.02 |
| C20orf7   | 1.454 | 16.53 |
| C20orf70  | 1.052 | 0     |
| C20orf71  | 1.124 | 0     |
| C20orf72  | 2.126 | 8.51  |
| C20orf74  | 5.617 | 1.24  |
| C20orf75  | 2.671 | 0     |
| C20orf77  | 6.472 | 18.71 |
| C20orf79  | 0.667 | 0     |
| C20orf82  | 2.587 | 0     |
| C20orf85  | 0.76  | 0     |
| C20orf86  | 1.014 | 0     |
| C20orf91  | 2.786 | 0.04  |
| C20orf94  | 1.407 | 0.77  |
| C20orf95  | 1.869 | 0     |
| C20orf96  | 1.555 | 7.45  |
| C21orf100 | 0.514 | 0     |
| C21orf114 | 2.048 | 0     |
| C21orf119 | 0.821 | 2.04  |
| C21orf121 | 0.777 | 0     |
| C21orf123 | 2.341 | 0     |
| C21orf124 | 1.972 | 7.27  |
| C21orf125 | 3.013 | 0.23  |
| C21orf128 | 2.055 | 0     |
| C21orf129 | 2.033 | 0     |
| C21orf13  | 2.364 | 0.04  |
| C21orf2   | 4.171 | 23.48 |
| C21orf24  | 3.809 | 1.4   |
| C21orf25  | 5.823 | 0.49  |
| C21orf29  | 3.967 | 0     |
| C21orf33  | 2.201 | 16.1  |
| C21orf34  | 1.322 | 0     |
| C21orf37  | 0.714 | 0     |
| C21orf41  | 1.02  | 1.36  |
| C21orf45  | 1.571 | 1.14  |
| C21orf49  | 2.464 | 0     |
| C21orf51  | 1.193 | 1.24  |



|          |       |       |
|----------|-------|-------|
| C21orf55 | 2.027 | 0.04  |
| C21orf56 | 1.085 | 3.38  |
| C21orf57 | 1.977 | 1.6   |
| C21orf58 | 4.182 | 1.01  |
| C21orf59 | 1.064 | 2.33  |
| C21orf6  | 1.712 | 1.5   |
| C21orf62 | 3.99  | 0     |
| C21orf63 | 1.933 | 0.41  |
| C21orf66 | 3.533 | 2.71  |
| C21orf67 | 1.033 | 0     |
| C21orf69 | 1.595 | 0     |
| C21orf7  | 1.997 | 1.88  |
| C21orf70 | 0.881 | 1.12  |
| C21orf77 | 1.452 | 0     |
| C21orf81 | 1.095 | 0     |
| C21orf84 | 0.579 | 0     |
| C21orf86 | 1.178 | 0.34  |
| C21orf87 | 1     | 0.2   |
| C21orf88 | 1.071 | 0     |
| C21orf90 | 0.824 | 0     |
| C21orf91 | 1.509 | 4.26  |
| C21orf93 | 2.323 | 0.76  |
| C21orf94 | 0.309 | 0     |
| C21orf99 | 0.558 | 0     |
| C22orf13 | 3.607 | 35.3  |
| C22orf15 | 2.02  | 0.98  |
| C22orf16 | 0.682 | 7.4   |
| C22orf23 | 1.562 | 1.84  |
| C22orf25 | 2.271 | 5.18  |
| C22orf26 | 1.836 | 1.18  |
| C22orf27 | 1.929 | 3.54  |
| C22orf28 | 2.02  | 16.95 |
| C22orf29 | 6.595 | 4.62  |
| C22orf30 | 1.849 | 1.01  |
| C22orf31 | 1.07  | 0     |
| C22orf32 | 1.567 | 45.97 |
| C22orf33 | 0.981 | 0     |
| C22orf34 | 1.465 | 0.81  |
| C22orf36 | 2.943 | 0.1   |
| C22orf5  | 3.587 | 14.23 |
| C22orf9  | 6.417 | 1.36  |
| C2orf13  | 3.798 | 0.36  |
| C2orf15  | 1.43  | 0.07  |
| C2orf16  | 6.199 | 0.04  |
| C2orf17  | 2.614 | 18.25 |
| C2orf18  | 3.912 | 8.42  |
| C2orf19  | 3.106 | 0     |
| C2orf21  | 2.771 | 0     |
| C2orf24  | 2.059 | 37.67 |
| C2orf25  | 1.38  | 31.33 |

|         |       |       |
|---------|-------|-------|
| C2orf27 | 1.221 | 0.24  |
| C2orf28 | 1.964 | 9.47  |
| C2orf29 | 2.932 | 7.72  |
| C2orf3  | 5.185 | 0.61  |
| C2orf30 | 2.41  | 5.38  |
| C2orf32 | 1.658 | 0     |
| C2orf33 | 2.157 | 12.66 |
| C2orf34 | 1.493 | 0.27  |
| C2orf37 | 2.459 | 1.08  |
| C2orf39 | 2.49  | 0     |
| C2orf40 | 0.781 | 0     |
| C2orf42 | 2.524 | 0.98  |
| C2orf43 | 2.856 | 0.38  |
| C2orf44 | 3.784 | 0.63  |
| C2orf46 | 2.342 | 0.21  |
| C2orf47 | 1.504 | 5.99  |
| C2orf48 | 1.902 | 0.31  |
| C2orf49 | 1.119 | 7.78  |
| C2orf4P | 2.154 | 2.62  |
| C2orf50 | 2.686 | 0     |
| C2orf51 | 0.795 | 0     |
| C2orf52 | 1.282 | 0.08  |
| C2orf53 | 2.001 | 0     |
| C2orf7  | 1.083 | 1.37  |
| C3      | 5.067 | 0     |
| C3AR1   | 1.955 | 1.32  |
| C3orf1  | 1.596 | 1.3   |
| C3orf10 | 1.176 | 52.16 |
| C3orf14 | 0.765 | 0     |
| C3orf15 | 4.171 | 0     |
| C3orf16 | 2.035 | 0     |
| C3orf17 | 5.905 | 12.03 |
| C3orf18 | 2.655 | 0.34  |
| C3orf19 | 2.94  | 6.36  |
| C3orf20 | 3.278 | 0.03  |
| C3orf21 | 2.703 | 0.84  |
| C3orf22 | 0.947 | 0     |
| C3orf23 | 6.964 | 0.33  |
| C3orf24 | 1.014 | 0     |
| C3orf25 | 2.154 | 0.04  |
| C3orf26 | 1.198 | 3.72  |
| C3orf27 | 2.697 | 0     |
| C3orf28 | 0.838 | 7.2   |
| C3orf30 | 1.814 | 0     |
| C3orf31 | 1.253 | 1.89  |
| C3orf32 | 1.542 | 0     |
| C3orf33 | 1.931 | 0.15  |
| C3orf34 | 1.378 | 0.14  |
| C3orf35 | 3.056 | 1.07  |
| C3orf36 | 1.668 | 0     |

|         |        |       |
|---------|--------|-------|
| C3orf37 | 3.419  | 55.19 |
| C3orf38 | 1.367  | 12.52 |
| C3orf39 | 2.541  | 0.62  |
| C3orf40 | 3.677  | 1.37  |
| C3orf41 | 0.679  | 0     |
| C3orf42 | 1.328  | 2.09  |
| C3orf43 | 3.063  | 0     |
| C3orf44 | 2.053  | 0.1   |
| C3orf45 | 1.434  | 0.28  |
| C3orf46 | 1.107  | 0     |
| C3orf47 | 0.362  | 3     |
| C3orf48 | 1.584  | 0.37  |
| C3orf49 | 1.045  | 0     |
| C3orf52 | 2.221  | 9.36  |
| C3orf53 | 0.912  | 0     |
| C3orf54 | 1.04   | 12.27 |
| C3orf55 | 0.937  | 0     |
| C3orf56 | 1.737  | 0.12  |
| C3orf57 | 2.306  | 0     |
| C3orf58 | 4.077  | 1.09  |
| C3orf59 | 3.368  | 0     |
| C3orf60 | 2.829  | 4.72  |
| C3orf62 | 3.345  | 2.81  |
| C3orf63 | 7.125  | 2.11  |
| C3orf64 | 4.138  | 1.24  |
| C3orf65 | 1.924  | 0.72  |
| C3orf66 | 2.52   | 0     |
| C4A     | 5.426  | 0.02  |
| C4B     | 16.278 | 0     |
| C4BPA   | 2.243  | 0.04  |
| C4BPAL2 | 0.2    | 0     |
| C4BPB   | 1.496  | 0.06  |
| C4orf11 | 0.848  | 0     |
| C4orf12 | 6.354  | 0.06  |
| C4orf14 | 2.272  | 14.81 |
| C4orf15 | 5.92   | 4.84  |
| C4orf16 | 2.817  | 0.95  |
| C4orf17 | 1.597  | 0     |
| C4orf18 | 7.615  | 0.01  |
| C4orf19 | 4.731  | 20.31 |
| C4orf20 | 1.559  | 3.36  |
| C4orf21 | 3.337  | 0.53  |
| C4orf22 | 0.889  | 0     |
| C4orf23 | 1.851  | 1.71  |
| C4orf26 | 0.706  | 0     |
| C4orf27 | 1.171  | 0.84  |
| C4orf28 | 1.814  | 0.28  |
| C4orf29 | 2.2    | 3.78  |
| C4orf30 | 3.38   | 18.7  |
| C4orf31 | 2.767  | 0     |

|          |       |       |
|----------|-------|-------|
| C4orf32  | 2.593 | 7.4   |
| C4orf33  | 1.784 | 0.89  |
| C4orf34  | 1.669 | 1     |
| C4orf35  | 1.544 | 0     |
| C4orf36  | 0.828 | 0     |
| C4orf6   | 0.873 | 0     |
| C4orf7   | 0.539 | 0     |
| C4orf8   | 4.733 | 12.14 |
| C5       | 5.465 | 0.94  |
| C5AR1    | 2.321 | 5.2   |
| C5orf13  | 2.019 | 6.66  |
| C5orf14  | 3.689 | 2.68  |
| C5orf15  | 2.594 | 14.91 |
| C5orf16  | 2.505 | 0.28  |
| C5orf20  | 3.135 | 0.06  |
| C5orf21  | 4.178 | 1.28  |
| C5orf22  | 2.705 | 1.64  |
| C5orf23  | 2.875 | 0.04  |
| C5orf24  | 4.259 | 5.76  |
| C5orf25  | 3.577 | 2.16  |
| C5orf26  | 1     | 51.75 |
| C5orf27  | 1.796 | 0     |
| C5orf28  | 2.936 | 0.34  |
| C5orf29  | 2.216 | 0.31  |
| C5orf3   | 2.886 | 1.2   |
| C5orf30  | 3.01  | 2.2   |
| C5orf32  | 0.82  | 7.6   |
| C5orf33  | 2.507 | 1.58  |
| C5orf34  | 2.57  | 1.62  |
| C5orf35  | 1.554 | 1.27  |
| C5orf36  | 1.992 | 0.1   |
| C5orf37  | 1.698 | 1.4   |
| C5orf38  | 0.89  | 0     |
| C5orf4   | 6.852 | 2.83  |
| C5orf5   | 5.465 | 4.73  |
| C6       | 3.551 | 0     |
| C6orf1   | 1.479 | 6.56  |
| C6orf10  | 6.402 | 0     |
| C6orf103 | 6.779 | 0     |
| C6orf105 | 1.569 | 0.31  |
| C6orf106 | 4.419 | 16.59 |
| C6orf107 | 6.885 | 6.63  |
| C6orf108 | 1.161 | 2.56  |
| C6orf111 | 4.189 | 61.12 |
| C6orf113 | 2.197 | 6.53  |
| C6orf114 | 1.527 | 15.03 |
| C6orf115 | 1.213 | 7.01  |
| C6orf117 | 2.207 | 0     |
| C6orf118 | 1.814 | 0     |
| C6orf12  | 3.659 | 0     |

|          |        |       |
|----------|--------|-------|
| C6orf120 | 4.146  | 9.83  |
| C6orf122 | 2.418  | 0     |
| C6orf123 | 1.652  | 0     |
| C6orf125 | 0.506  | 2.93  |
| C6orf128 | 1.546  | 2.62  |
| C6orf129 | 0.607  | 1.96  |
| C6orf130 | 1.174  | 6.32  |
| C6orf134 | 11.235 | 0.02  |
| C6orf136 | 4.437  | 0     |
| C6orf137 | 3.198  | 0.18  |
| C6orf141 | 1.825  | 0     |
| C6orf142 | 1.738  | 0     |
| C6orf145 | 1.867  | 5.99  |
| C6orf146 | 2.196  | 0     |
| C6orf148 | 2.015  | 0.2   |
| C6orf15  | 3.408  | 0.03  |
| C6orf150 | 1.887  | 0.84  |
| C6orf151 | 4.173  | 3.56  |
| C6orf152 | 4.719  | 0     |
| C6orf153 | 1.159  | 14.85 |
| C6orf154 | 2.121  | 0     |
| C6orf155 | 2.933  | 0     |
| C6orf157 | 1.833  | 0.86  |
| C6orf159 | 0.664  | 0     |
| C6orf162 | 1.802  | 0.76  |
| C6orf163 | 2.11   | 0.37  |
| C6orf165 | 3.45   | 0     |
| C6orf166 | 2.555  | 38.37 |
| C6orf167 | 4.269  | 0.72  |
| C6orf168 | 2.017  | 0     |
| C6orf170 | 3.431  | 0.37  |
| C6orf173 | 0.527  | 3     |
| C6orf174 | 3.556  | 0.08  |
| C6orf176 | 1.136  | 0     |
| C6orf182 | 2.508  | 0.16  |
| C6orf184 | 0.827  | 0     |
| C6orf185 | 1.183  | 0     |
| C6orf188 | 3.539  | 0     |
| C6orf189 | 1.033  | 0     |
| C6orf190 | 4.03   | 0.05  |
| C6orf191 | 0.545  | 0     |
| C6orf192 | 2.425  | 0.69  |
| C6orf194 | 1.639  | 0.12  |
| C6orf195 | 2.434  | 0     |
| C6orf199 | 2.563  | 0.15  |
| C6orf201 | 2.403  | 0.2   |
| C6orf203 | 0.899  | 1.98  |
| C6orf204 | 1.722  | 2.36  |
| C6orf205 | 10.938 | 0     |
| C6orf206 | 0.915  | 0     |

|          |       |       |
|----------|-------|-------|
| C6orf208 | 2.318 | 0     |
| C6orf21  | 2.694 | 0     |
| C6orf211 | 2.572 | 1.08  |
| C6orf213 | 2.01  | 0     |
| C6orf218 | 1.078 | 0     |
| C6orf25  | 4.311 | 0.11  |
| C6orf26  | 1.831 | 4.32  |
| C6orf27  | 5.118 | 0.04  |
| C6orf32  | 3.775 | 18.64 |
| C6orf35  | 2.959 | 0     |
| C6orf47  | 7.426 | 0     |
| C6orf48  | 2.526 | 0     |
| C6orf49  | 2.897 | 21.34 |
| C6orf51  | 0.941 | 7.04  |
| C6orf52  | 0.497 | 0     |
| C6orf54  | 2.8   | 0     |
| C6orf55  | 3.244 | 2.38  |
| C6orf57  | 0.525 | 0.19  |
| C6orf58  | 1.2   | 0.08  |
| C6orf59  | 1.848 | 0.37  |
| C6orf60  | 4.044 | 0.03  |
| C6orf62  | 4.585 | 41.71 |
| C6orf64  | 1.92  | 7.22  |
| C6orf65  | 2.278 | 0     |
| C6orf66  | 0.698 | 0.85  |
| C6orf70  | 2.078 | 7.23  |
| C6orf72  | 1.224 | 18.26 |
| C6orf78  | 1.311 | 0     |
| C6orf81  | 1.169 | 6.18  |
| C6orf85  | 5.415 | 15.73 |
| C6orf89  | 2.496 | 9.55  |
| C6orf94  | 1.192 | 0     |
| C6orf97  | 5.231 | 0     |
| C7       | 4.012 | 0.03  |
| C7orf10  | 3.216 | 0     |
| C7orf11  | 1.812 | 2.62  |
| C7orf13  | 3.724 | 0     |
| C7orf16  | 3.5   | 0     |
| C7orf20  | 4.468 | 16.43 |
| C7orf23  | 2.574 | 11.95 |
| C7orf24  | 2.33  | 3.1   |
| C7orf25  | 3.586 | 1     |
| C7orf26  | 3.819 | 4.12  |
| C7orf27  | 5.4   | 4.05  |
| C7orf28A | 3.652 | 3.44  |
| C7orf28B | 3.53  | 3.73  |
| C7orf29  | 5.746 | 0.9   |
| C7orf30  | 1.51  | 2.88  |
| C7orf31  | 7.218 | 0.28  |
| C7orf33  | 2.708 | 0     |

|          |       |       |
|----------|-------|-------|
| C7orf34  | 1.54  | 0     |
| C7orf36  | 1.73  | 1.26  |
| C7orf38  | 4.53  | 0.35  |
| C7orf41  | 11.21 | 10.99 |
| C7orf42  | 6.329 | 13.04 |
| C7orf43  | 5.027 | 8.98  |
| C7orf44  | 2.177 | 11.95 |
| C7orf45  | 3.91  | 0.12  |
| C7orf46  | 2.797 | 1.52  |
| C7orf47  | 1.86  | 17.13 |
| C7orf48  | 2.778 | 2.42  |
| C7orf49  | 3.552 | 7.19  |
| C8A      | 2.358 | 0     |
| C8B      | 2.037 | 0     |
| C8G      | 0.855 | 0.23  |
| C8orf13  | 4.071 | 0.04  |
| C8orf15  | 1.743 | 0     |
| C8orf16  | 2.179 | 0     |
| C8orf17  | 2.781 | 0.04  |
| C8orf22  | 1.261 | 0     |
| C8orf30A | 2.404 | 0.45  |
| C8orf31  | 1.875 | 0     |
| C8orf32  | 1.348 | 1.4   |
| C8orf33  | 2.615 | 11.16 |
| C8orf34  | 3.652 | 0     |
| C8orf37  | 2.254 | 0.27  |
| C8orf38  | 2.402 | 8.44  |
| C8orf4   | 1.455 | 0     |
| C8orf40  | 0.793 | 7.73  |
| C8orf41  | 2.168 | 4.88  |
| C8orf42  | 1.885 | 0     |
| C8orf44  | 1.817 | 2.18  |
| C8orf45  | 2.248 | 0.13  |
| C8orf46  | 3.17  | 0.04  |
| C8orf47  | 1.55  | 0     |
| C8orf48  | 1.445 | 0     |
| C8orf49  | 1.968 | 0     |
| C8orf51  | 1.918 | 0.57  |
| C8orf53  | 0.969 | 6.94  |
| C8orf54  | 2.315 | 0     |
| C8orf55  | 2.264 | 0.83  |
| C8orf58  | 2.054 | 1.83  |
| C8orf59  | 1.314 | 19.35 |
| C8orf61  | 1.862 | 15.41 |
| C8orf62  | 1.106 | 0     |
| C8orf68  | 0.811 | 0.49  |
| C8orf70  | 1.239 | 0.16  |
| C8orf72  | 4.368 | 0.09  |
| C8orf73  | 2.569 | 2.92  |
| C8orf74  | 1.036 | 0     |

|          |       |       |
|----------|-------|-------|
| C8orf76  | 1.286 | 4.46  |
| C8orf77  | 2.644 | 0.52  |
| C8orf78  | 1.746 | 0     |
| C8orf79  | 2.39  | 0     |
| C8ORFK23 | 6.051 | 0     |
| C8ORFK29 | 1.596 | 0.37  |
| C8ORFK32 | 1.616 | 0     |
| C8ORFK36 | 1.746 | 0     |
| C9       | 2.069 | 0     |
| C9orf100 | 3.763 | 5.84  |
| C9orf102 | 3.261 | 1.37  |
| C9orf103 | 1.614 | 1.23  |
| C9orf105 | 1.448 | 4.65  |
| C9orf106 | 3.145 | 0     |
| C9orf11  | 1.023 | 0     |
| C9orf114 | 1.856 | 2.72  |
| C9orf116 | 0.781 | 0.38  |
| C9orf117 | 2.129 | 0.09  |
| C9orf119 | 0.981 | 1.21  |
| C9orf121 | 1.457 | 0     |
| C9orf122 | 3.436 | 0     |
| C9orf123 | 2.487 | 3.14  |
| C9orf125 | 2.089 | 0     |
| C9orf126 | 1.968 | 1.51  |
| C9orf127 | 2.109 | 0.99  |
| C9orf128 | 1.722 | 0     |
| C9orf131 | 3.644 | 0.03  |
| C9orf135 | 0.851 | 0     |
| C9orf138 | 1.86  | 0     |
| C9orf139 | 3.815 | 0.52  |
| C9orf140 | 3.648 | 0.19  |
| C9orf142 | 0.812 | 10.72 |
| C9orf144 | 3.188 | 0     |
| C9orf150 | 2.69  | 0     |
| C9orf152 | 2.162 | 0.13  |
| C9orf153 | 0.409 | 0     |
| C9orf156 | 1.647 | 4.2   |
| C9orf16  | 0.613 | 56.97 |
| C9orf163 | 2.573 | 0.08  |
| C9orf164 | 1.837 | 4.58  |
| C9orf165 | 1.078 | 0     |
| C9orf166 | 0.501 | 0     |
| C9orf167 | 4.071 | 1.53  |
| C9orf18  | 0.699 | 0     |
| C9orf19  | 1.883 | 2.26  |
| C9orf21  | 1.225 | 2.34  |
| C9orf23  | 1.124 | 2.73  |
| C9orf24  | 1.641 | 0     |
| C9orf25  | 3.594 | 2.12  |
| C9orf27  | 0.772 | 0     |



|         |       |       |
|---------|-------|-------|
| C9orf29 | 1.095 | 0     |
| C9orf3  | 2.82  | 0.81  |
| C9orf30 | 1.16  | 2.65  |
| C9orf32 | 1.002 | 6.91  |
| C9orf36 | 4.223 | 0     |
| C9orf37 | 1.388 | 4.28  |
| C9orf39 | 4.766 | 0.54  |
| C9orf4  | 1.133 | 0     |
| C9orf40 | 1.946 | 4.22  |
| C9orf41 | 2.193 | 1.08  |
| C9orf43 | 2.048 | 0.24  |
| C9orf45 | 5.98  | 9.79  |
| C9orf46 | 0.916 | 0.65  |
| C9orf47 | 4.829 | 0     |
| C9orf48 | 4.602 | 0.06  |
| C9orf5  | 7.992 | 2.32  |
| C9orf50 | 1.618 | 0.06  |
| C9orf52 | 2.428 | 0.08  |
| C9orf57 | 1.629 | 0     |
| C9orf58 | 3.65  | 5.09  |
| C9orf6  | 2.124 | 1.63  |
| C9orf61 | 2.421 | 0     |
| C9orf64 | 2.067 | 0.2   |
| C9orf66 | 2.28  | 0.04  |
| C9orf68 | 2.437 | 0     |
| C9orf7  | 2.687 | 0.29  |
| C9orf71 | 1.245 | 0.08  |
| C9orf72 | 4.435 | 2.28  |
| C9orf75 | 2.109 | 1.59  |
| C9orf77 | 4.215 | 46.03 |
| C9orf78 | 3.038 | 12.57 |
| C9orf79 | 4.445 | 0     |
| C9orf80 | 1.524 | 2.34  |
| C9orf82 | 2.714 | 1.02  |
| C9orf84 | 5.269 | 0.02  |
| C9orf85 | 1.317 | 4.13  |
| C9orf86 | 3.13  | 19.12 |
| C9orf89 | 3.352 | 76.66 |
| C9orf9  | 0.719 | 1.65  |
| C9orf90 | 3.182 | 3.48  |
| C9orf91 | 3.91  | 19.89 |
| C9orf93 | 4.359 | 0.36  |
| C9orf94 | 3.893 | 3.46  |
| C9orf95 | 1.158 | 1.8   |
| C9orf96 | 2.779 | 0.14  |
| C9orf97 | 4.062 | 5.07  |
| C9orf98 | 2.106 | 0.04  |
| CA1     | 1.264 | 3.68  |
| CA10    | 3.189 | 0     |
| CA11    | 1.653 | 11.37 |

|          |        |       |
|----------|--------|-------|
| CA12     | 3.975  | 0     |
| CA13     | 3.564  | 0.39  |
| CA14     | 1.742  | 2.04  |
| CA2      | 1.551  | 20.74 |
| CA3      | 2.356  | 0.04  |
| CA4      | 1.105  | 0.63  |
| CA5A     | 1.084  | 0     |
| CA5B     | 2.255  | 2.94  |
| CA6      | 1.339  | 7.16  |
| CA7      | 2.052  | 0.2   |
| CA8      | 2.278  | 0     |
| CA9      | 1.552  | 0.12  |
| CAB39    | 4.516  | 29.13 |
| CAB39L   | 2.702  | 1.47  |
| CABC1    | 2.871  | 7.58  |
| CABIN1   | 8.166  | 13.69 |
| CABLES1  | 2.471  | 0.2   |
| CABLES2  | 3.777  | 0.39  |
| CABP1    | 1.899  | 0     |
| CABP2    | 0.925  | 0     |
| CABP4    | 1.466  | 0.68  |
| CABP5    | 1.251  | 0     |
| CABP7    | 2.982  | 15.16 |
| CABYR    | 3.262  | 0.12  |
| CABYRP   | 1.411  | 0     |
| CACHD1   | 5.547  | 0.09  |
| CACNA1A  | 8.563  | 0.08  |
| CACNA1B  | 7.342  | 0.03  |
| CACNA1C  | 8.425  | 0.06  |
| CACNA1D  | 7.192  | 0.02  |
| CACNA1E  | 9.724  | 0     |
| CACNA1F  | 6.07   | 0.37  |
| CACNA1G  | 9.542  | 0     |
| CACNA1H  | 8.088  | 0.25  |
| CACNA1I  | 10.002 | 0.17  |
| CACNA1S  | 6.166  | 0     |
| CACNA2D1 | 7.644  | 0     |
| CACNA2D2 | 5.536  | 0.46  |
| CACNA2D3 | 3.675  | 0     |
| CACNA2D4 | 7.222  | 0.37  |
| CACNB1   | 4.242  | 2.08  |
| CACNB2   | 4.44   | 0.71  |
| CACNB3   | 2.698  | 8.83  |
| CACNB4   | 3.416  | 0.26  |
| CACNG1   | 1.266  | 0     |
| CACNG2   | 1.548  | 0     |
| CACNG3   | 2.701  | 0     |
| CACNG4   | 3.397  | 0     |
| CACNG5   | 1.295  | 0     |
| CACNG6   | 1.85   | 0     |

|          |        |        |
|----------|--------|--------|
| CACNG7   | 1.564  | 0      |
| CACNG8   | 1.417  | 0.91   |
| CACYBP   | 3.535  | 3.13   |
| CAD      | 7.108  | 1.85   |
| CADM1    | 3.509  | 0.05   |
| CADM2    | 3.332  | 0      |
| CADM3    | 2.525  | 0      |
| CADM4    | 2.176  | 0.28   |
| CADPS    | 5.627  | 0      |
| CADPS2   | 9.396  | 0.04   |
| CAGE1    | 4.349  | 1.96   |
| CALB1    | 2.531  | 0      |
| CALB2    | 2.263  | 0      |
| CALCA    | 1.454  | 0      |
| CALCB    | 1.031  | 0      |
| CALCOCO1 | 3.892  | 22.34  |
| CALCOCO2 | 5.013  | 38.83  |
| CALCP    | 0.501  | 0      |
| CALCR    | 6.94   | 0.14   |
| CALCRL   | 3.008  | 0.13   |
| CALD1    | 11.776 | 0.66   |
| CALM1    | 10.777 | 55.45  |
| CALM1P1  | 0.108  | 102.6  |
| CALM1P2  | 0.768  | 0.13   |
| CALM2    | 1.128  | 66.66  |
| CALM2P2  | 0.445  | 36.24  |
| CALM2P3  | 3.213  | 0.37   |
| CALM3    | 2.259  | 43.71  |
| CALML3   | 1.302  | 0      |
| CALML4   | 5.786  | 5.42   |
| CALML5   | 0.851  | 0      |
| CALML6   | 1.101  | 0.45   |
| CALN1    | 12.227 | 0.15   |
| CALR     | 2.253  | 117.42 |
| CALR3    | 1.273  | 0      |
| CALU     | 6.634  | 1.08   |
| CAMK1    | 1.483  | 1.8    |
| CAMK1D   | 5.626  | 11.79  |
| CAMK1G   | 2.47   | 0      |
| CAMK2A   | 4.836  | 0.22   |
| CAMK2B   | 4.992  | 0.04   |
| CAMK2D   | 6.756  | 5.32   |
| CAMK2G   | 4.461  | 5.06   |
| CAMK2N1  | 0.847  | 0      |
| CAMK2N2  | 1.36   | 0      |
| CAMK4    | 2.107  | 0.19   |
| CAMKK1   | 4.582  | 1.3    |
| CAMKK2   | 9.388  | 4.76   |
| CAMKV    | 3.028  | 0.04   |
| CAMLG    | 2.203  | 15.63  |

|           |       |       |
|-----------|-------|-------|
| CAMP      | 0.714 | 0.69  |
| CAMSAP1   | 6.06  | 1.81  |
| CAMSAP1L1 | 7.352 | 2.01  |
| CAMTA1    | 8.727 | 1.48  |
| CAMTA2    | 4.475 | 10.48 |
| CAND1     | 5.669 | 17.64 |
| CAND2     | 5.355 | 0.44  |
| CANT1     | 3.473 | 10.8  |
| CANX      | 5.074 | 23.98 |
| CAP1      | 2.923 | 42.14 |
| CAP2      | 3.027 | 0     |
| CAP2P1    | 2.014 | 0.49  |
| CAPG      | 1.442 | 7.75  |
| CAPN1     | 3.658 | 19.58 |
| CAPN10    | 3.657 | 4.22  |
| CAPN11    | 2.728 | 4.13  |
| CAPN12    | 3.129 | 0.79  |
| CAPN13    | 2.682 | 0.77  |
| CAPN14    | 3.787 | 0.78  |
| CAPN2     | 3.406 | 9.39  |
| CAPN3     | 5.988 | 4.21  |
| CAPN5     | 4.393 | 0.6   |
| CAPN6     | 3.568 | 0     |
| CAPN7     | 4.368 | 7.15  |
| CAPN9     | 2.851 | 0     |
| CAPNS1    | 1.49  | 108.3 |
| CAPNS2    | 1.009 | 0     |
| CAPS      | 1.641 | 10.61 |
| CAPS2     | 3.831 | 0.36  |
| CAPSL     | 0.934 | 0.21  |
| CAPZA1    | 3.041 | 40.93 |
| CAPZA1P   | 0.855 | 7.52  |
| CAPZA2    | 4.712 | 5.29  |
| CAPZA3    | 1.078 | 0     |
| CAPZB     | 4.771 | 30.63 |
| CARD10    | 3.899 | 0     |
| CARD11    | 8.516 | 1.75  |
| CARD14    | 4.734 | 0.04  |
| CARD6     | 4.097 | 0.51  |
| CARD8     | 5.063 | 5.16  |
| CARD9     | 2.098 | 0.14  |
| CARHSP1   | 2.278 | 28.75 |
| CARKL     | 4.134 | 5.17  |
| CARM1     | 2.968 | 9.27  |
| CARS      | 3.494 | 7.02  |
| CARS2     | 1.843 | 7.14  |
| CART1     | 1.442 | 0     |
| CARTPT    | 1.816 | 0     |
| CASC1     | 2.55  | 0.04  |
| CASC2     | 3.816 | 0     |

|          |        |       |
|----------|--------|-------|
| CASC3    | 4.106  | 24.05 |
| CASC4    | 3.961  | 2.72  |
| CASC5    | 8.693  | 0.29  |
| CASD1    | 7.634  | 2.79  |
| CASK     | 3.123  | 0.41  |
| CASKIN1  | 5.695  | 0.38  |
| CASKIN2  | 4.978  | 0.64  |
| CASKP    | 18.328 | 0.03  |
| CASP1    | 1.408  | 17.29 |
| CASP10   | 4.615  | 13.7  |
| CASP12   | 13.287 | 1.77  |
| CASP14   | 0.777  | 0     |
| CASP2    | 14.014 | 4.51  |
| CASP3    | 2.673  | 14.8  |
| CASP4    | 1.982  | 32.39 |
| CASP5    | 1.399  | 0.14  |
| CASP6    | 1.661  | 0.66  |
| CASP7    | 4.973  | 8.99  |
| CASP8    | 4.34   | 34.88 |
| CASP8AP2 | 6.749  | 0.73  |
| CASP9    | 1.993  | 3.13  |
| CASQ1    | 1.878  | 0.58  |
| CASQ2    | 2.527  | 0     |
| CASR     | 4.913  | 0     |
| CAST     | 7.189  | 45.58 |
| CASZ1    | 4.094  | 5.61  |
| CAT      | 2.56   | 21.49 |
| CATSPER1 | 2.615  | 0.04  |
| CATSPER2 | 3.546  | 0.87  |
| CATSPER3 | 1.338  | 0.6   |
| CATSPER4 | 1.419  | 0     |
| CAV1     | 5.408  | 0.24  |
| CAV2     | 11.743 | 0     |
| CAV3     | 2.223  | 0     |
| CBARA1   | 2.363  | 7.87  |
| CBFA2T2  | 8.061  | 1.41  |
| CBFA2T3  | 4.599  | 7.08  |
| CBFB     | 5.581  | 4.01  |
| CBL      | 11.227 | 2.36  |
| CBLB     | 3.976  | 14.56 |
| CBLC     | 1.557  | 0.26  |
| CBLL1    | 4.477  | 13.53 |
| CBLN1    | 1.517  | 0     |
| CBLN2    | 2.733  | 0     |
| CBLN3    | 2.336  | 2.84  |
| CBLN4    | 2.508  | 0     |
| CBR1     | 1.245  | 1.19  |
| CBR3     | 1.112  | 2.49  |
| CBR4     | 3.456  | 0.77  |
| CBS      | 2.516  | 0.24  |

|          |       |       |
|----------|-------|-------|
| CBWD1    | 1.679 | 0.12  |
| CBWD2    | 1.677 | 0.7   |
| CBWD3    | 1.677 | 0     |
| CBWD5    | 1.143 | 0.09  |
| CBX1     | 2.216 | 0.71  |
| CBX2     | 5.016 | 0.79  |
| CBX3     | 3.864 | 9.09  |
| CBX4     | 3.737 | 22.96 |
| CBX5     | 1.545 | 12.43 |
| CBX6     | 5.164 | 10.38 |
| CBX7     | 3.964 | 2.35  |
| CBX8     | 1.521 | 0.59  |
| CBY1     | 1.271 | 1.16  |
| CC2D1A   | 3.686 | 4.24  |
| CC2D1B   | 5.639 | 4.16  |
| CCAR1    | 3.858 | 15.13 |
| CCBE1    | 3.233 | 0     |
| CCBL1    | 2.106 | 1.55  |
| CCBL2    | 2.084 | 3.99  |
| CCBP2    | 2.948 | 0.44  |
| CCDC100  | 2.341 | 4.86  |
| CCDC101  | 1.141 | 5.29  |
| CCDC102A | 2.429 | 0.9   |
| CCDC102B | 2     | 0     |
| CCDC103  | 1.256 | 0.08  |
| CCDC104  | 1.372 | 2.67  |
| CCDC105  | 1.732 | 0     |
| CCDC106  | 1.993 | 2.48  |
| CCDC107  | 1.012 | 48.79 |
| CCDC108  | 8.122 | 0     |
| CCDC109A | 2.949 | 7.41  |
| CCDC109B | 1.212 | 7.26  |
| CCDC11   | 1.824 | 0.21  |
| CCDC110  | 2.851 | 0     |
| CCDC111  | 2.079 | 1.05  |
| CCDC112  | 3.03  | 0.06  |
| CCDC113  | 5.249 | 0     |
| CCDC114  | 1.907 | 0.05  |
| CCDC115  | 1.644 | 8.79  |
| CCDC116  | 2.192 | 0     |
| CCDC117  | 3.935 | 7.12  |
| CCDC12   | 1.138 | 39.29 |
| CCDC120  | 3.972 | 1.12  |
| CCDC121  | 2.342 | 0.21  |
| CCDC122  | 3.461 | 0.28  |
| CCDC123  | 2.605 | 0.68  |
| CCDC124  | 1.038 | 20.4  |
| CCDC125  | 7.233 | 0.38  |
| CCDC126  | 4.946 | 0.18  |
| CCDC127  | 1.42  | 4.11  |

|         |       |       |
|---------|-------|-------|
| CCDC128 | 3.137 | 2.05  |
| CCDC129 | 9.088 | 0     |
| CCDC13  | 2.827 | 0     |
| CCDC130 | 1.632 | 20.61 |
| CCDC131 | 7.158 | 3.28  |
| CCDC132 | 7.754 | 1.23  |
| CCDC134 | 1.275 | 1.71  |
| CCDC135 | 2.898 | 0.07  |
| CCDC14  | 7.914 | 5.13  |
| CCDC15  | 2.659 | 0     |
| CCDC16  | 1.63  | 13.41 |
| CCDC17  | 1.873 | 7.23  |
| CCDC18  | 4.658 | 0.34  |
| CCDC19  | 1.795 | 1.38  |
| CCDC21  | 3.935 | 1.48  |
| CCDC22  | 2.715 | 4.84  |
| CCDC23  | 0.652 | 13.5  |
| CCDC24  | 1.463 | 10.21 |
| CCDC25  | 3.586 | 2.21  |
| CCDC26  | 1.721 | 0.75  |
| CCDC27  | 2.177 | 0     |
| CCDC28A | 1.496 | 19.78 |
| CCDC28B | 1.415 | 2.73  |
| CCDC3   | 2.738 | 0.14  |
| CCDC32  | 1.705 | 6.38  |
| CCDC33  | 2.093 | 0     |
| CCDC34  | 3.051 | 1.07  |
| CCDC35  | 4.862 | 1.77  |
| CCDC36  | 2.613 | 0     |
| CCDC37  | 2.086 | 0     |
| CCDC38  | 1.953 | 0     |
| CCDC4   | 3.33  | 0     |
| CCDC40  | 6.094 | 0.08  |
| CCDC41  | 2.936 | 1.32  |
| CCDC42  | 1.374 | 0     |
| CCDC43  | 2.082 | 8.36  |
| CCDC44  | 1.457 | 5.64  |
| CCDC45  | 3.501 | 25.92 |
| CCDC46  | 3.85  | 0.2   |
| CCDC47  | 3.267 | 10.27 |
| CCDC48  | 1.963 | 0.05  |
| CCDC49  | 2.33  | 18.56 |
| CCDC5   | 1.098 | 6.76  |
| CCDC50  | 2.454 | 0.73  |
| CCDC51  | 1.506 | 0.39  |
| CCDC52  | 5.412 | 0.88  |
| CCDC53  | 0.857 | 3.81  |
| CCDC54  | 1.294 | 0     |
| CCDC55  | 4.449 | 3.69  |
| CCDC56  | 0.753 | 3.02  |

|         |       |       |
|---------|-------|-------|
| CCDC57  | 2.997 | 4.06  |
| CCDC58  | 0.718 | 1.11  |
| CCDC59  | 1.055 | 16.69 |
| CCDC6   | 5.704 | 32.65 |
| CCDC60  | 2.45  | 0     |
| CCDC62  | 3.368 | 0.27  |
| CCDC63  | 1.945 | 0     |
| CCDC64  | 1.664 | 0.36  |
| CCDC65  | 1.777 | 0.28  |
| CCDC66  | 3.098 | 1.24  |
| CCDC67  | 1.656 | 0     |
| CCDC68  | 3.977 | 0     |
| CCDC69  | 3.399 | 19.94 |
| CCDC7   | 2.445 | 0.08  |
| CCDC70  | 1.125 | 0     |
| CCDC71  | 1.781 | 5.39  |
| CCDC72  | 0.463 | 80.56 |
| CCDC73  | 4.015 | 0.54  |
| CCDC74A | 1.457 | 0     |
| CCDC74B | 1.471 | 0     |
| CCDC75  | 1.098 | 5.58  |
| CCDC76  | 3.129 | 0.85  |
| CCDC77  | 2.258 | 1.27  |
| CCDC78  | 4.796 | 1.08  |
| CCDC79  | 1.846 | 0     |
| CCDC8   | 2.757 | 0     |
| CCDC80  | 4.732 | 0     |
| CCDC81  | 2.51  | 0.75  |
| CCDC82  | 2.695 | 6.9   |
| CCDC83  | 2.345 | 0     |
| CCDC84  | 1.384 | 16.16 |
| CCDC85A | 3.983 | 0     |
| CCDC85B | 1.232 | 10.84 |
| CCDC86  | 1.893 | 1.78  |
| CCDC87  | 2.884 | 0.07  |
| CCDC88  | 4.915 | 7.49  |
| CCDC89  | 2.428 | 0     |
| CCDC9   | 2.017 | 11.67 |
| CCDC90A | 1.229 | 2.33  |
| CCDC90B | 1.578 | 2.13  |
| CCDC91  | 2.335 | 1.06  |
| CCDC92  | 1.793 | 2.04  |
| CCDC93  | 6.794 | 3.47  |
| CCDC94  | 1.415 | 7.55  |
| CCDC95  | 1.185 | 7.68  |
| CCDC96  | 1.769 | 0.17  |
| CCDC97  | 3.322 | 6.64  |
| CCDC98  | 2.718 | 3.79  |
| CCDC99  | 2.529 | 0.7   |
| CCHCR1  | 8.796 | 0.21  |



|             |       |        |
|-------------|-------|--------|
| CCIN        | 1.93  | 0.11   |
| CCK         | 0.829 | 0      |
| CCKAR       | 1.682 | 0      |
| CCKBR       | 2.12  | 0.1    |
| CCL1        | 0.542 | 0      |
| CCL11       | 0.925 | 0      |
| CCL13       | 0.851 | 0      |
| CCL14       | 0.481 | 0      |
| CCL14-CCL15 | 0.1   | 0      |
| CCL15       | 0.962 | 0      |
| CCL16       | 1.497 | 0      |
| CCL17       | 0.615 | 360.36 |
| CCL18       | 0.77  | 0      |
| CCL19       | 0.684 | 0      |
| CCL2        | 0.749 | 0.4    |
| CCL20       | 0.8   | 0      |
| CCL21       | 0.878 | 0      |
| CCL22       | 2.894 | 0.04   |
| CCL23       | 0.74  | 0      |
| CCL24       | 0.72  | 0      |
| CCL25       | 0.891 | 0      |
| CCL26       | 1.124 | 0      |
| CCL27       | 0.446 | 0      |
| CCL28       | 0.816 | 6.67   |
| CCL3        | 0.775 | 1.15   |
| CCL3L1      | 0.783 | 0      |
| CCL3L2      | 1.244 | 0      |
| CCL3L3      | 0.775 | 0      |
| CCL4        | 0.667 | 1.64   |
| CCL4L1      | 0.659 | 0      |
| CCL4L2      | 0.379 | 0      |
| CCL5        | 1.23  | 6.2    |
| CCL7        | 0.805 | 0      |
| CCL8        | 1.25  | 0      |
| CCM2        | 4.612 | 3.56   |
| CCNA1       | 1.73  | 0.35   |
| CCNA2       | 1.676 | 1.07   |
| CCNB1       | 2.093 | 1.65   |
| CCNB1IP1    | 2.963 | 22.47  |
| CCNB2       | 1.513 | 3.14   |
| CCNB3       | 4.513 | 0      |
| CCNC        | 2.682 | 11.28  |
| CCND1       | 4.289 | 0.14   |
| CCND2       | 6.48  | 29.26  |
| CCND2P      | 0.953 | 0.2    |
| CCND3       | 2.427 | 68.69  |
| CCNDBP1     | 1.979 | 14.5   |
| CCNE1       | 2.074 | 0.67   |
| CCNE2       | 2.837 | 1.08   |
| CCNF        | 4.238 | 0.33   |

|         |       |        |
|---------|-------|--------|
| CCNG1   | 2.602 | 20.69  |
| CCNG2   | 2.037 | 5.58   |
| CCNH    | 1.378 | 10.2   |
| CCNI    | 2.671 | 129.57 |
| CCNJ    | 4.11  | 2.55   |
| CCNJL   | 3.274 | 0.39   |
| CCNK    | 3.504 | 28.1   |
| CCNL1   | 6.072 | 60.11  |
| CCNL2   | 7.216 | 18.79  |
| CCNT1   | 4.359 | 13.78  |
| CCNT2   | 8.578 | 10.46  |
| CCNU    | 2.973 | 0.1    |
| CCNY    | 3.363 | 20.89  |
| CCNYL1  | 1.952 | 2.43   |
| CCNYL2  | 1.999 | 0      |
| CCNYL3  | 2.541 | 0      |
| CCPG1   | 6.822 | 2.48   |
| CCR1    | 2.676 | 0.67   |
| CCR10   | 1.229 | 0.32   |
| CCR2    | 4.169 | 0      |
| CCR3    | 1.945 | 0      |
| CCR4    | 1.657 | 0.42   |
| CCR5    | 3.655 | 0.22   |
| CCR6    | 4.444 | 12.25  |
| CCR7    | 2.173 | 6.6    |
| CCR8    | 2.371 | 0      |
| CCR9    | 5.006 | 0      |
| CCRK    | 2.521 | 0      |
| CCRL1   | 2.485 | 0.31   |
| CCRL1P  | 1.832 | 0.16   |
| CCRL2   | 1.729 | 0.69   |
| CCRN4L  | 1.954 | 0.71   |
| CCS     | 1.224 | 17.87  |
| CCT2    | 1.954 | 26.08  |
| CCT3    | 2.211 | 34.68  |
| CCT4    | 2.6   | 35.54  |
| CCT5    | 3.403 | 4.04   |
| CCT6A   | 6.018 | 17.04  |
| CCT6B   | 1.816 | 0.98   |
| CCT7    | 1.892 | 30.54  |
| CCT8    | 1.895 | 55.97  |
| CD109   | 6.407 | 7.83   |
| CD14    | 1.867 | 1.48   |
| CD151   | 1.62  | 1.96   |
| CD160   | 2.033 | 4.68   |
| CD163   | 4.105 | 0.72   |
| CD163L1 | 4.583 | 0      |
| CD164   | 2.993 | 13.85  |
| CD164L2 | 1.457 | 0      |
| CD177   | 2.426 | 5.38   |

|         |        |        |
|---------|--------|--------|
| CD180   | 2.698  | 0.26   |
| CD19    | 1.95   | 134.4  |
| CD1A    | 2.072  | 0      |
| CD1B    | 1.294  | 0      |
| CD1C    | 1.194  | 0      |
| CD1D    | 2.253  | 0.66   |
| CD1E    | 0.972  | 0      |
| CD2     | 1.515  | 1.7    |
| CD200   | 3.319  | 13.23  |
| CD200R1 | 2.862  | 0.04   |
| CD200R2 | 1.296  | 0      |
| CD207   | 1.868  | 0      |
| CD209   | 4.267  | 0.16   |
| CD22    | 3.251  | 23.8   |
| CD226   | 2.565  | 0.15   |
| CD24    | 2.18   | 398.65 |
| CD244   | 2.463  | 0.6    |
| CD247   | 3.438  | 9.81   |
| CD248   | 2.558  | 21.12  |
| CD27    | 1.477  | 32.89  |
| CD274   | 1.54   | 0.12   |
| CD276   | 3.401  | 0.03   |
| CD28    | 3.806  | 0.84   |
| CD2AP   | 4.644  | 5.28   |
| CD2BP2  | 1.622  | 25.19  |
| CD300A  | 1.889  | 3.56   |
| CD300C  | 1.517  | 0.33   |
| CD300E  | 0.739  | 0.27   |
| CD300LB | 2.286  | 0.44   |
| CD300LF | 1.759  | 0.73   |
| CD300LG | 2.756  | 0      |
| CD302   | 3.741  | 0.87   |
| CD320   | 1.25   | 6.34   |
| CD33    | 1.436  | 0.55   |
| CD33L3  | 1.505  | 0.06   |
| CD34    | 4.738  | 147.57 |
| CD36    | 5.562  | 0.05   |
| CD37    | 2.35   | 86.44  |
| CD38    | 1.493  | 0.4    |
| CD3D    | 1.53   | 1.68   |
| CD3E    | 1.356  | 3.43   |
| CD3EAP  | 3.478  | 5.29   |
| CD3G    | 0.823  | 0.72   |
| CD4     | 3.103  | 1.81   |
| CD40    | 2.509  | 3.98   |
| CD40LG  | 1.833  | 0.32   |
| CD44    | 9.034  | 10.79  |
| CD46    | 7.894  | 6.67   |
| CD47    | 14.066 | 20.18  |
| CD48    | 1.07   | 16.65  |

|        |        |         |
|--------|--------|---------|
| CD5    | 3.121  | 1.74    |
| CD52   | 0.505  | 400.65  |
| CD53   | 5.162  | 57.71   |
| CD55   | 2.841  | 32.91   |
| CD58   | 1.04   | 2.76    |
| CD59   | 7.809  | 14.47   |
| CD5L   | 2.152  | 0       |
| CD6    | 3.23   | 2.39    |
| CD63   | 1.095  | 45.99   |
| CD68   | 2.483  | 6.97    |
| CD69   | 1.676  | 42.15   |
| CD7    | 1.283  | 5.63    |
| CD70   | 0.913  | 0.87    |
| CD72   | 1.968  | 17.04   |
| CD74   | 2.2    | 3923.44 |
| CD79A  | 1.444  | 116.07  |
| CD79B  | 1.421  | 234.36  |
| CD80   | 2.725  | 0.14    |
| CD81   | 1.497  | 108.06  |
| CD82   | 2.223  | 12.19   |
| CD83   | 3.132  | 21.48   |
| CD84   | 3.276  | 0.78    |
| CD86   | 2.901  | 0.2     |
| CD8A   | 2.202  | 4.27    |
| CD8B   | 3.054  | 0.51    |
| CD8BP  | 20.283 | 0.03    |
| CD9    | 2.181  | 166.57  |
| CD93   | 6.701  | 0.98    |
| CD96   | 4.481  | 0.44    |
| CD97   | 3.896  | 419.9   |
| CD99   | 1.237  | 500.61  |
| CD99L2 | 3.605  | 2.77    |
| CDA    | 0.96   | 1.34    |
| CDADC1 | 3.346  | 3.28    |
| CDAN1  | 4.73   | 4.58    |
| CDC10P | 1.304  | 0.38    |
| CDC123 | 1.738  | 25.68   |
| CDC14A | 5.221  | 2.81    |
| CDC14B | 5.792  | 0.04    |
| CDC14C | 4.284  | 0       |
| CDC16  | 2.196  | 8.65    |
| CDC2   | 1.227  | 2.26    |
| CDC20  | 1.669  | 3.2     |
| CDC20B | 2.946  | 0       |
| CDC20P | 1.621  | 1.46    |
| CDC23  | 3.142  | 5.57    |
| CDC25A | 3.706  | 0.64    |
| CDC25B | 3.761  | 11.55   |
| CDC25C | 2.115  | 0.1     |
| CDC26  | 0.872  | 4.88    |

|          |        |        |
|----------|--------|--------|
| CDC27    | 3.277  | 11.29  |
| CDC2L1   | 3.51   | 15.67  |
| CDC2L2   | 3.526  | 12.62  |
| CDC2L5   | 11.037 | 2.41   |
| CDC2L6   | 6.139  | 3.66   |
| CDC34    | 1.845  | 12.82  |
| CDC37    | 1.671  | 96.69  |
| CDC37L1  | 1.706  | 4.12   |
| CDC40    | 3.853  | 9.6    |
| CDC42    | 3.565  | 41.85  |
| CDC42BPA | 8.019  | 1.63   |
| CDC42BPB | 6.757  | 5.68   |
| CDC42BPG | 4.68   | 0.46   |
| CDC42EP1 | 2.23   | 0.04   |
| CDC42EP2 | 2.2    | 11.42  |
| CDC42EP3 | 5.508  | 42.07  |
| CDC42EP4 | 3.101  | 1.63   |
| CDC42EP5 | 0.875  | 3.96   |
| CDC42P1  | 0.548  | 0.18   |
| CDC42SE1 | 3.728  | 105.54 |
| CDC42SE2 | 3.657  | 40.69  |
| CDC45L   | 1.91   | 1.92   |
| CDC5L    | 3      | 10.26  |
| CDC6     | 3.053  | 0.39   |
| CDC7     | 3.172  | 0.6    |
| CDC73    | 2.98   | 2.85   |
| CDCA2    | 3.722  | 0.16   |
| CDCA3    | 1.119  | 0.71   |
| CDCA4    | 2.9    | 2.15   |
| CDCA5    | 2.485  | 4.22   |
| CDCA7    | 2.81   | 1.58   |
| CDCA7L   | 6.474  | 25.91  |
| CDCA8    | 2.303  | 2.28   |
| CDCP1    | 6.61   | 0.03   |
| CDCP2    | 2.723  | 0      |
| CDGAP    | 6.32   | 0.16   |
| CDH1     | 4.815  | 0      |
| CDH10    | 3.261  | 0      |
| CDH11    | 3.648  | 0      |
| CDH12    | 4.164  | 0      |
| CDH12P   | 0.602  | 0      |
| CDH13    | 3.828  | 0      |
| CDH15    | 2.859  | 0      |
| CDH16    | 2.833  | 0      |
| CDH17    | 3.697  | 0      |
| CDH18    | 2.944  | 0      |
| CDH19    | 3.185  | 0      |
| CDH2     | 4.108  | 0      |
| CDH20    | 2.855  | 0      |
| CDH22    | 3.657  | 0.03   |

|          |        |       |
|----------|--------|-------|
| CDH23    | 11.395 | 0.08  |
| CDH24    | 2.873  | 0.44  |
| CDH26    | 3.397  | 0     |
| CDH3     | 3.636  | 0.05  |
| CDH4     | 3.062  | 0.06  |
| CDH5     | 4.09   | 1.98  |
| CDH6     | 4.521  | 0     |
| CDH7     | 3.002  | 0     |
| CDH8     | 2.929  | 0     |
| CDH9     | 3.075  | 0     |
| CDIPT    | 2.079  | 16.99 |
| CDK10    | 3.638  | 8.37  |
| CDK2     | 2.29   | 4.84  |
| CDK2AP1  | 1.615  | 15.13 |
| CDK2AP2  | 1.378  | 9.26  |
| CDK3     | 1.158  | 4.61  |
| CDK4     | 1.443  | 8.29  |
| CDK5     | 2.274  | 1     |
| CDK5R1   | 3.854  | 0.18  |
| CDK5R2   | 2.48   | 0     |
| CDK5RAP1 | 2.268  | 16.01 |
| CDK5RAP2 | 6.23   | 6.67  |
| CDK5RAP3 | 3.667  | 41.25 |
| CDK6     | 25.096 | 5.21  |
| CDK7     | 2.834  | 2.02  |
| CDK7PS   | 1.14   | 1.65  |
| CDK8     | 1.769  | 1.84  |
| CDK9     | 4.216  | 85.72 |
| CDKAL1   | 2.408  | 1.77  |
| CDKL1    | 1.177  | 2.27  |
| CDKL2    | 1.921  | 0     |
| CDKL3    | 1.501  | 0.13  |
| CDKL4    | 1.567  | 0     |
| CDKL5    | 3.518  | 0.14  |
| CDKN1A   | 2.351  | 55.29 |
| CDKN1B   | 3.132  | 41.92 |
| CDKN1C   | 1.493  | 0.33  |
| CDKN2A   | 2.735  | 1.38  |
| CDKN2AIP | 2.374  | 9.13  |
| CDKN2B   | 7.485  | 0.44  |
| CDKN2C   | 2.853  | 11.31 |
| CDKN2D   | 1.447  | 45.06 |
| CDKN3    | 0.836  | 0.71  |
| CDO1     | 1.614  | 0.12  |
| CDON     | 8.044  | 0.15  |
| CDR1     | 1.299  | 0     |
| CDR2     | 2.702  | 7.32  |
| CDR2L    | 3.529  | 0     |
| CDRT1    | 1.282  | 0     |
| CDRT15   | 0.567  | 0.35  |

|           |       |       |
|-----------|-------|-------|
| CDRT4     | 2.489 | 0     |
| CDS1      | 2.4   | 0     |
| CDS2      | 9.104 | 79.22 |
| CDSN      | 7.641 | 0.03  |
| CDT1      | 2.675 | 6.44  |
| CDV3      | 3.307 | 31.5  |
| CDX1      | 1.699 | 0     |
| CDX2      | 2.09  | 0     |
| CDX4      | 0.855 | 0     |
| CDY1      | 4.262 | 0     |
| CDY10P    | 2.868 | 0     |
| CDY11P    | 3.029 | 0     |
| CDY12P    | 1.209 | 0     |
| CDY13P    | 1.209 | 0     |
| CDY14P    | 1.208 | 0     |
| CDY15P    | 3.242 | 0     |
| CDY16P    | 1.331 | 0     |
| CDY17P    | 2.137 | 0     |
| CDY18P    | 3.448 | 0     |
| CDY19P    | 3.448 | 0     |
| CDY1B     | 4.262 | 0     |
| CDY20P    | 2.137 | 0     |
| CDY21P    | 1.331 | 0     |
| CDY22P    | 3.242 | 0     |
| CDY23P    | 1.208 | 0     |
| CDY2A     | 1.96  | 0     |
| CDY2B     | 1.96  | 0     |
| CDY3P     | 2.805 | 0     |
| CDY4P     | 2.73  | 0     |
| CDY5P     | 1.999 | 0     |
| CDY6P     | 2.137 | 0     |
| CDY7P     | 2.297 | 0     |
| CDY8P     | 2.137 | 0     |
| CDY9P     | 1.999 | 0     |
| CDYL      | 4.391 | 2.91  |
| CDYL2     | 2.233 | 0.84  |
| CEACAM1   | 5.452 | 0.33  |
| CEACAM16  | 1.797 | 0     |
| CEACAM19  | 1.863 | 0     |
| CEACAM20  | 2.12  | 0     |
| CEACAM21  | 1.715 | 19.5  |
| CEACAM3   | 1.022 | 0.58  |
| CEACAM4   | 1.205 | 1.64  |
| CEACAM5   | 2.972 | 0     |
| CEACAM6   | 2.528 | 0.94  |
| CEACAM7   | 2.291 | 0     |
| CEACAM8   | 2.271 | 0.61  |
| CEACAMP10 | 0.912 | 0     |
| CEACAMP11 | 0.911 | 0     |
| CEACAMP2  | 0.289 | 0     |

|          |        |       |
|----------|--------|-------|
| CEACAMP3 | 0.248  | 0     |
| CEACAMP4 | 0.297  | 0     |
| CEACAMP5 | 8.866  | 0     |
| CEACAMP6 | 0.911  | 0     |
| CEACAMP7 | 0.913  | 0     |
| CEACAMP8 | 0.901  | 0     |
| CEACAMP9 | 0.912  | 0     |
| CEBPA    | 2.385  | 1.99  |
| CEBPB    | 1.837  | 13.89 |
| CEBPD    | 1.295  | 5.2   |
| CEBPE    | 1.201  | 0.41  |
| CEBPG    | 3.736  | 8.13  |
| CEBPZ    | 3.33   | 5.44  |
| CECR1    | 6.215  | 1.14  |
| CECR2    | 5.931  | 12.38 |
| CECR5    | 1.88   | 6.52  |
| CECR6    | 4.954  | 0.54  |
| CECR8    | 1.185  | 0     |
| CEECAM1  | 2.327  | 1.36  |
| CEL      | 2.35   | 0.46  |
| CELP     | 4.818  | 0.02  |
| CELSR1   | 11.389 | 1.07  |
| CELSR2   | 10.534 | 0.74  |
| CELSR3   | 11.962 | 0.12  |
| CEND1    | 1.643  | 0     |
| CENPA    | 1.389  | 0.5   |
| CENPB    | 2.84   | 13.55 |
| CENPC1   | 3.349  | 8.63  |
| CENPC2   | 3.138  | 1.93  |
| CENPE    | 8.612  | 0.33  |
| CENPF    | 10.296 | 0.92  |
| CENPH    | 1.389  | 2.14  |
| CENPI    | 2.563  | 0.23  |
| CENPJ    | 4.345  | 0.41  |
| CENPK    | 1.72   | 0.28  |
| CENPL    | 1.901  | 0.68  |
| CENPM    | 1.39   | 1.42  |
| CENPN    | 1.387  | 2.43  |
| CENPO    | 1.625  | 4.32  |
| CENPP    | 3.422  | 0.41  |
| CENPQ    | 1.728  | 0.28  |
| CENPT    | 2.133  | 29.18 |
| CENTA1   | 4.592  | 1.03  |
| CENTA2   | 2.749  | 0.47  |
| CENTB1   | 2.483  | 16.58 |
| CENTB2   | 7.091  | 5.38  |
| CENTB5   | 2.877  | 8.63  |
| CENTD1   | 7.771  | 14.92 |
| CENTD2   | 6.216  | 7.16  |
| CENTD3   | 5.262  | 0.04  |



|         |        |       |
|---------|--------|-------|
| CENTG1  | 3.938  | 1.08  |
| CENTG2  | 4.53   | 5.28  |
| CENTG3  | 6.832  | 12.48 |
| CEP110  | 7.431  | 3.4   |
| CEP135  | 5.67   | 1.9   |
| CEP152  | 4.788  | 4.03  |
| CEP164  | 5.629  | 2.57  |
| CEP170  | 6.816  | 6.59  |
| CEP170L | 97.094 | 0.2   |
| CEP192  | 9.438  | 2.1   |
| CEP250  | 8.348  | 2.63  |
| CEP27   | 1.754  | 6.32  |
| CEP290  | 7.951  | 0.81  |
| CEP350  | 12.701 | 10.36 |
| CEP55   | 2.618  | 0.45  |
| CEP57   | 3.158  | 9.43  |
| CEP63   | 2.77   | 1.93  |
| CEP68   | 4.694  | 32.4  |
| CEP70   | 2.663  | 1.19  |
| CEP72   | 2.355  | 0.25  |
| CEP76   | 2.869  | 0.86  |
| CEP78   | 2.304  | 1.59  |
| CEPT1   | 2.348  | 5.94  |
| CER1    | 1.206  | 0     |
| CERK    | 8.749  | 41.12 |
| CERKL   | 3.492  | 7.73  |
| CES1    | 2.299  | 0.09  |
| CES2    | 4.033  | 3.49  |
| CES4    | 2.259  | 0     |
| CES7    | 1.962  | 0     |
| CESK1   | 2.053  | 0     |
| CETN1   | 1.158  | 0     |
| CETN2   | 1.08   | 2.84  |
| CETN3   | 0.982  | 0.7   |
| CETP    | 1.79   | 0.11  |
| CFB     | 7.722  | 0.08  |
| CFC1    | 1.009  | 0     |
| CFD     | 1.173  | 1.6   |
| CFDP1   | 1.279  | 10.36 |
| CFH     | 4.243  | 0     |
| CFHR1   | 1.262  | 0     |
| CFHR2   | 1.036  | 0     |
| CFHR3   | 1.597  | 0     |
| CFHR4   | 1.262  | 0     |
| CFHR5   | 2.794  | 0     |
| CFI     | 1.963  | 0     |
| CFL1    | 1.26   | 178.4 |
| CFL2    | 3.232  | 1.84  |
| CFLAR   | 2.213  | 13.68 |
| CFLP1   | 26.779 | 0.01  |

|          |        |       |
|----------|--------|-------|
| CFP      | 1.701  | 11.4  |
| CFTR     | 12.264 | 0.02  |
| CG018    | 2.107  | 13.29 |
| CGA      | 0.704  | 0     |
| CGB      | 0.879  | 0     |
| CGB1     | 0.732  | 0     |
| CGB2     | 0.732  | 0     |
| CGB5     | 0.88   | 0     |
| CGB7     | 0.88   | 0     |
| CGB8     | 0.88   | 0     |
| CGGBP1   | 4.539  | 10.09 |
| CGI-09   | 2.311  | 1.32  |
| CGI-148P | 1.833  | 0.6   |
| CGI-38   | 1.132  | 0.27  |
| CGN      | 5.088  | 0.04  |
| CGNL1    | 7.218  | 0.04  |
| CGREF1   | 1.848  | 0     |
| CGRRF1   | 1.323  | 4.94  |
| CH25H    | 1.381  | 0     |
| CHAC1    | 1.498  | 0.66  |
| CHAC2    | 1.275  | 0.08  |
| CHAD     | 1.783  | 0.44  |
| CHAF1A   | 3.343  | 5.09  |
| CHAF1B   | 2.279  | 2.91  |
| CHAT     | 3.042  | 0.04  |
| CHCHD1   | 0.549  | 17.48 |
| CHCHD2   | 2.601  | 7.72  |
| CHCHD3   | 3.19   | 3.88  |
| CHCHD4   | 1.549  | 0.38  |
| CHCHD5   | 0.673  | 11.91 |
| CHCHD6   | 0.946  | 2.2   |
| CHCHD7   | 3.318  | 2.75  |
| CHCHD8   | 0.817  | 6.66  |
| CHCHD9   | 0.774  | 30.94 |
| CHD1     | 6.457  | 28.41 |
| CHD1L    | 2.967  | 8.37  |
| CHD2     | 15.83  | 58.12 |
| CHD3     | 7.642  | 72.37 |
| CHD4     | 6.497  | 17.38 |
| CHD5     | 10.303 | 1.13  |
| CHD6     | 10.807 | 12.44 |
| CHD7     | 11.443 | 28.97 |
| CHD8     | 7.38   | 13.3  |
| CHD9     | 10.836 | 7.27  |
| CHDH     | 2.147  | 0     |
| CHEK1    | 2.007  | 3.8   |
| CHEK2    | 1.987  | 0.6   |
| CHERP    | 4.075  | 6.87  |
| CHES1    | 7.818  | 13.54 |
| CHFR     | 3.854  | 16.02 |

|            |        |       |
|------------|--------|-------|
| CHGA       | 1.994  | 0     |
| CHGB       | 2.454  | 0     |
| ChGn       | 3.872  | 7.89  |
| CHI3L1     | 1.921  | 0.57  |
| CHI3L2     | 1.843  | 0.05  |
| CHIA       | 1.422  | 0     |
| CHIC1      | 4.158  | 0.24  |
| CHIC2      | 1.125  | 9.15  |
| CHID1      | 2.736  | 5.46  |
| CHIT1      | 1.635  | 0.48  |
| CHKA       | 7.978  | 45.64 |
| CHKB       | 1.595  | 16.93 |
| CHKB-CPT1B | 0.1    | 0     |
| CHL1       | 7.65   | 0     |
| CHM        | 5.442  | 0.69  |
| CHML       | 7.067  | 11.05 |
| CHMP1B     | 1.272  | 45.19 |
| CHMP2A     | 1.032  | 30.68 |
| CHMP2B     | 2.395  | 4.42  |
| CHMP4A     | 1.505  | 8.48  |
| CHMP4B     | 1.635  | 53.49 |
| CHMP4C     | 1.847  | 0     |
| CHMP5      | 1.39   | 4.76  |
| CHMP6      | 1.61   | 2.83  |
| CHMP7      | 3.386  | 2.89  |
| CHN1       | 2.957  | 0.93  |
| CHN2       | 10.131 | 7.03  |
| CHODL      | 2.545  | 0     |
| CHORDC1    | 2.039  | 3.93  |
| CHORDC2P   | 2.392  | 0.04  |
| CHP        | 3.23   | 8.12  |
| CHPF       | 2.933  | 0.07  |
| CHPT1      | 2.7    | 43.17 |
| CHR415SYT  | 2.584  | 0     |
| CHRAC1     | 2.497  | 5.31  |
| CHRD       | 3.521  | 0     |
| CHRD1      | 2.471  | 0.6   |
| CHRD2      | 1.678  | 0     |
| CHRFAM7A   | 3.026  | 0.13  |
| CHRM1      | 2.823  | 0     |
| CHRM2      | 6.778  | 0     |
| CHRM3      | 2.748  | 0.25  |
| CHRM4      | 1.468  | 1.82  |
| CHRM5      | 2.683  | 0.04  |
| CHRNA1     | 2.04   | 4.22  |
| CHRNA10    | 1.945  | 0.1   |
| CHRNA2     | 2.666  | 0     |
| CHRNA3     | 2.999  | 0.1   |
| CHRNA4     | 5.54   | 0     |
| CHRNA5     | 2.428  | 0.04  |

|             |       |        |
|-------------|-------|--------|
| CHRNA6      | 2.09  | 0      |
| CHRNA7      | 2.171 | 0.18   |
| CHRNA9      | 1.892 | 0      |
| CHRNA1      | 2.437 | 0.61   |
| CHRNA2      | 2.448 | 0      |
| CHRNA3      | 1.956 | 0      |
| CHRNA4      | 2.448 | 1.25   |
| CHRND       | 1.741 | 0.12   |
| CHRNE       | 2.463 | 2.09   |
| CHRNG       | 2.187 | 0.09   |
| CHST1       | 2.718 | 0      |
| CHST10      | 2.815 | 1.69   |
| CHST11      | 1.656 | 11.06  |
| CHST12      | 4.206 | 2.56   |
| CHST13      | 1.739 | 0.12   |
| CHST2       | 3.043 | 36.45  |
| CHST3       | 6.963 | 1.75   |
| CHST4       | 2.011 | 0      |
| CHST5       | 5.282 | 0      |
| CHST6       | 3.751 | 0      |
| CHST7       | 3.186 | 3.29   |
| CHST8       | 2.479 | 0      |
| CHST9       | 2.136 | 0      |
| CHSY1       | 4.535 | 28.53  |
| CHSY-2      | 3.492 | 0      |
| CHTF18      | 3.065 | 3.74   |
| CHUK        | 3.524 | 2.42   |
| CHURC1      | 3.381 | 12.08  |
| CHX10       | 2.995 | 0      |
| CIAO1       | 4.944 | 24.57  |
| CIAPIN1     | 2.106 | 8.83   |
| CIB1        | 0.862 | 35.46  |
| CIB2        | 1.547 | 0.96   |
| CIB3        | 0.661 | 0      |
| CIB4        | 0.745 | 0      |
| CIC         | 7.133 | 42.45  |
| CICE        | 9.387 | 1.99   |
| CICK0721Q.1 | 1.198 | 0.33   |
| CIDEA       | 1.164 | 0      |
| CIDEB       | 2.242 | 8.87   |
| CIDEC       | 1.277 | 0.23   |
| CIITA       | 5.643 | 45.5   |
| CILP        | 4.432 | 0.03   |
| CILP2       | 3.593 | 0.17   |
| CINP        | 0.979 | 5.56   |
| CIP29       | 1.111 | 27.25  |
| CIR         | 2.074 | 39.54  |
| CIRBP       | 1.688 | 294.76 |
| CIRH1A      | 2.192 | 6.41   |
| CISH        | 2.017 | 8.24   |

|         |       |       |
|---------|-------|-------|
| CIT     | 8.576 | 0.73  |
| CITED1  | 1.184 | 0     |
| CITED2  | 1.93  | 21.48 |
| CITED4  | 1.291 | 7.89  |
| CIZ1    | 3.032 | 28.58 |
| CKAP2   | 3.626 | 3.55  |
| CKAP2L  | 3.205 | 0.56  |
| CKAP4   | 2.915 | 22.94 |
| CKAP5   | 6.698 | 5.4   |
| CKB     | 1.431 | 1.72  |
| CKBP1   | 2.162 | 0     |
| CKLF    | 1.313 | 5.57  |
| CKM     | 1.557 | 0     |
| CKMT1A  | 1.779 | 0     |
| CKMT1B  | 1.779 | 0     |
| CKMT2   | 1.598 | 0.5   |
| CKS1A   | 0.717 | 0.97  |
| CKS1B   | 0.717 | 1.38  |
| CKS1BP  | 0.718 | 0     |
| CKS1BP2 | 0.709 | 0     |
| CKS1BP3 | 0.709 | 0     |
| CKS2    | 0.613 | 14.85 |
| CLASP1  | 8.089 | 8.8   |
| CLASP2  | 7.261 | 2.7   |
| CLC     | 0.63  | 6.43  |
| CLCA1   | 3.312 | 0     |
| CLCA2   | 3.969 | 0     |
| CLCA3   | 3.412 | 0     |
| CLCA4   | 3.211 | 0     |
| CLCC1   | 2.226 | 5.11  |
| CLCF1   | 1.842 | 2.63  |
| CLCN1   | 6.186 | 0     |
| CLCN2   | 2.697 | 0.19  |
| CLCN3   | 5.151 | 0.75  |
| CLCN4   | 4.557 | 0.04  |
| CLCN5   | 3.177 | 0.12  |
| CLCN6   | 5.937 | 6.61  |
| CLCN7   | 6.578 | 30.6  |
| CLCNKA  | 2.461 | 0     |
| CLCNKB  | 2.16  | 0     |
| CLCP1   | 0.608 | 0.16  |
| CLDN1   | 3.429 | 0     |
| CLDN10  | 2.817 | 0     |
| CLDN11  | 2.157 | 0.09  |
| CLDN12  | 6.938 | 1.34  |
| CLDN14  | 2.003 | 0     |
| CLDN15  | 4.482 | 1.92  |
| CLDN16  | 1.494 | 0     |
| CLDN17  | 0.675 | 0     |
| CLDN18  | 3.632 | 0.03  |

|         |       |        |
|---------|-------|--------|
| CLDN19  | 2.859 | 0.04   |
| CLDN2   | 2.959 | 0      |
| CLDN20  | 1.209 | 0.49   |
| CLDN22  | 0.522 | 0      |
| CLDN23  | 1.576 | 0      |
| CLDN3   | 2.5   | 0.47   |
| CLDN4   | 3.646 | 0.11   |
| CLDN5   | 1.699 | 10.25  |
| CLDN6   | 1.344 | 0      |
| CLDN7   | 1.298 | 0.84   |
| CLDN8   | 1.989 | 0      |
| CLDN9   | 1.715 | 0.28   |
| CLDND1  | 3.619 | 6.99   |
| CLDND2  | 0.974 | 0.92   |
| CLEC10A | 1.867 | 1.27   |
| CLEC11A | 1.407 | 124.04 |
| CLEC12A | 1.549 | 0.12   |
| CLEC12B | 3.029 | 0      |
| CLEC14A | 2.256 | 38.02  |
| CLEC1A  | 1.779 | 0      |
| CLEC1B  | 0.952 | 0      |
| CLEC2A  | 0.732 | 0      |
| CLEC2B  | 3.558 | 33     |
| CLEC2D  | 4.593 | 5.45   |
| CLEC2L  | 0.81  | 0      |
| CLEC3A  | 1.887 | 0      |
| CLEC3B  | 0.841 | 0      |
| CLEC4A  | 1.377 | 0.93   |
| CLEC4C  | 1.314 | 0      |
| CLEC4D  | 1.936 | 0.2    |
| CLEC4E  | 2.158 | 0.78   |
| CLEC4F  | 2.475 | 0      |
| CLEC4G  | 1.304 | 0      |
| CLEC4M  | 5.242 | 0      |
| CLEC5A  | 7.022 | 0.14   |
| CLEC6A  | 1.613 | 0      |
| CLEC7A  | 4.546 | 0.48   |
| CLEC9A  | 1.673 | 0      |
| CLGN    | 2.705 | 0      |
| CLIC1   | 3.753 | 0.45   |
| CLIC2   | 2.686 | 0.22   |
| CLIC3   | 0.813 | 0.6    |
| CLIC4   | 4.29  | 11.11  |
| CLIC5   | 5.703 | 0      |
| CLIC6   | 3.8   | 0.11   |
| CLINT1  | 4.474 | 54.75  |
| CLIP1   | 5.88  | 7.5    |
| CLIP2   | 11.11 | 3.61   |
| CLIP3   | 3.349 | 0.68   |
| CLIP4   | 4.261 | 0.28   |

|         |        |       |
|---------|--------|-------|
| CLK1    | 4.148  | 70.6  |
| CLK2    | 2.737  | 10.08 |
| CLK2P   | 26.923 | 0.12  |
| CLK3    | 4.79   | 28.01 |
| CLK4    | 2.869  | 12.18 |
| CLLU1   | 3.897  | 0     |
| CLLU1OS | 0.686  | 0     |
| CLMN    | 3.118  | 0.63  |
| CLN3    | 1.689  | 7.85  |
| CLN5    | 4.064  | 2.28  |
| CLN6    | 2.187  | 9.46  |
| CLN8    | 4.817  | 12.18 |
| CLNS1A  | 1.366  | 13.18 |
| CLNS1B  | 1.319  | 0.3   |
| CLOCK   | 0.1    | 34.63 |
| CLP1    | 2.432  | 10.45 |
| CLPB    | 3.116  | 1.3   |
| CLPP    | 1.151  | 21.31 |
| CLPS    | 0.539  | 0     |
| CLPSMCR | 2.276  | 0.04  |
| CLPTM1  | 2.469  | 14.95 |
| CLPTM1L | 2.148  | 10.45 |
| CLPX    | 2.351  | 10.94 |
| CLRN1   | 3.623  | 0     |
| CLRN2   | 0.855  | 0     |
| CLRN3   | 1.143  | 0     |
| CLSPN   | 4.379  | 0.59  |
| CLSTN1  | 6.93   | 33.41 |
| CLSTN2  | 4.421  | 0     |
| CLSTN3  | 3.187  | 6.36  |
| CLTA    | 1.188  | 20.66 |
| CLTB    | 1.725  | 19.55 |
| CLTC    | 6.525  | 48.08 |
| CLTCL1  | 5.483  | 0.84  |
| CLU     | 3.244  | 0.52  |
| CLUAP1  | 3.219  | 0.71  |
| CLUL1   | 2.001  | 0     |
| CLYBL   | 2.73   | 0.44  |
| CMA1    | 0.784  | 0     |
| CMAH    | 58.691 | 0.51  |
| CMAS    | 1.741  | 3.41  |
| CMBL    | 4.047  | 1.06  |
| CMIP    | 4.382  | 7.39  |
| CMKLR1  | 1.882  | 0     |
| CMPK    | 2.811  | 15.91 |
| CMTM1   | 1.55   | 0.2   |
| CMTM2   | 1.063  | 1.58  |
| CMTM3   | 2.563  | 17.33 |
| CMTM4   | 10.887 | 1.63  |
| CMTM5   | 1.2    | 0     |

|        |        |        |
|--------|--------|--------|
| CMTM6  | 3.366  | 26.96  |
| CMTM7  | 1.351  | 19.55  |
| CMTM8  | 1.973  | 19.36  |
| CMYA1  | 6.451  | 0.09   |
| CMYA3  | 10.221 | 0      |
| CMYA5  | 12.892 | 0      |
| CNBD1  | 1.593  | 0      |
| CNBP   | 1.496  | 142.52 |
| CNDP1  | 2.198  | 0.04   |
| CNDP2  | 2.949  | 13.85  |
| CNFN   | 0.523  | 0      |
| CNGA1  | 2.525  | 0      |
| CNGA2  | 3.285  | 0      |
| CNGA3  | 3.47   | 0      |
| CNGA4  | 1.851  | 0.11   |
| CNGB1  | 4.344  | 0      |
| CNGB3  | 4.347  | 0      |
| CNIH   | 2.48   | 8.3    |
| CNIH2  | 1.33   | 1.04   |
| CNIH3  | 2.372  | 0      |
| CNIH4  | 0.623  | 9.37   |
| CNKSR1 | 2.514  | 0.44   |
| CNKSR2 | 3.281  | 0.03   |
| CNKSR3 | 5.713  | 66.66  |
| CNN1   | 1.586  | 0      |
| CNN2   | 2.458  | 10.63  |
| CNN3   | 2.032  | 71.76  |
| CNNM1  | 4.782  | 0.11   |
| CNNM2  | 4.33   | 0.41   |
| CNNM3  | 4.916  | 3.02   |
| CNNM4  | 4.8    | 2.84   |
| CNO    | 1.546  | 4.48   |
| CNOT1  | 9.008  | 12.14  |
| CNOT10 | 2.741  | 2.75   |
| CNOT2  | 3.28   | 30.65  |
| CNOT3  | 2.855  | 10.33  |
| CNOT4  | 9.014  | 3.55   |
| CNOT6  | 6.176  | 6.27   |
| CNOT6L | 5.886  | 34.59  |
| CNOT7  | 3.671  | 5.23   |
| CNOT8  | 2.483  | 45.62  |
| CNP    | 5.222  | 5.71   |
| CNPY1  | 2.718  | 0      |
| CNR1   | 6.789  | 0.03   |
| CNR2   | 1.775  | 1.56   |
| CNTD1  | 2.241  | 0.27   |
| CNTD2  | 1.783  | 0.11   |
| CNTF   | 1.891  | 0.58   |
| CNTFR  | 2.038  | 0      |
| CNTN1  | 3.427  | 0      |



|         |        |       |
|---------|--------|-------|
| CNTN2   | 7.637  | 0.03  |
| CNTN3   | 4.997  | 0     |
| CNTN4   | 5.988  | 0     |
| CNTN5   | 4.164  | 0     |
| CNTN6   | 3.53   | 0     |
| CNTNAP1 | 5.275  | 0.34  |
| CNTNAP2 | 19.775 | 0.01  |
| CNTNAP3 | 5.229  | 0     |
| CNTNAP4 | 4.91   | 0     |
| CNTNAP5 | 5.481  | 0     |
| CNTROB  | 4.831  | 7.05  |
| COASY   | 2.452  | 15.41 |
| COBL    | 10.581 | 0     |
| COBLL1  | 4.923  | 0.2   |
| COBRA1  | 2.372  | 11.97 |
| COCH    | 3.026  | 32.04 |
| COG1    | 3.035  | 7.04  |
| COG2    | 2.901  | 0.89  |
| COG3    | 5.021  | 7.56  |
| COG4    | 2.797  | 4.04  |
| COG5    | 7.683  | 2.27  |
| COG6    | 3.427  | 0.35  |
| COG7    | 2.79   | 4.79  |
| COG8    | 2.482  | 4.59  |
| COIL    | 2.634  | 4.35  |
| COILP1  | 2.595  | 0.12  |
| COILP2  | 2.351  | 0.13  |
| COL10A1 | 3.26   | 0     |
| COL11A1 | 6.472  | 0     |
| COL11A2 | 19.275 | 0     |
| COL12A1 | 11.579 | 0     |
| COL13A1 | 3.239  | 0     |
| COL14A1 | 6.459  | 0     |
| COL15A1 | 5.211  | 0     |
| COL16A1 | 5.462  | 0.11  |
| COL17A1 | 5.947  | 0     |
| COL18A1 | 6.058  | 0.54  |
| COL19A1 | 8.725  | 0     |
| COL1A1  | 5.92   | 0.23  |
| COL1A2  | 10.829 | 0.04  |
| COL20A1 | 4.171  | 0     |
| COL21A1 | 4.173  | 0     |
| COL22A1 | 6.346  | 0     |
| COL23A1 | 3.061  | 13.31 |
| COL24A1 | 6.5    | 0.6   |
| COL25A1 | 2.959  | 0     |
| COL27A1 | 5.583  | 0.89  |
| COL28A1 | 7.031  | 0.02  |
| COL2A1  | 5.06   | 0     |
| COL3A1  | 5.49   | 0     |

|          |        |       |
|----------|--------|-------|
| COL4A1   | 6.494  | 0.09  |
| COL4A2   | 6.264  | 0.08  |
| COL4A3   | 14.108 | 0.02  |
| COL4A3BP | 2.767  | 6.93  |
| COL4A4   | 7.844  | 0.01  |
| COL4A5   | 6.445  | 0     |
| COL4A6   | 6.815  | 0     |
| COL5A1   | 9.38   | 14.17 |
| COL5A2   | 6.93   | 0.07  |
| COL5A3   | 6.174  | 0     |
| COL6A1   | 4.225  | 2.15  |
| COL6A2   | 4.942  | 0.52  |
| COL6A3   | 10.658 | 3.97  |
| COL7A1   | 9.261  | 0.05  |
| COL8A1   | 2.658  | 0     |
| COL8A2   | 4.443  | 0.04  |
| COL9A1   | 3.932  | 0     |
| COL9A2   | 2.831  | 2.41  |
| COL9A3   | 2.511  | 0.08  |
| COLEC10  | 1.686  | 0     |
| COLEC11  | 1.539  | 0.12  |
| COLEC12  | 6.022  | 0     |
| COLQ     | 10.155 | 24.57 |
| COMMD1   | 0.713  | 7.63  |
| COMMD10  | 1.427  | 1.73  |
| COMMD2   | 1.424  | 4.44  |
| COMMD3   | 0.946  | 11.61 |
| COMMD4   | 0.925  | 12.72 |
| COMMD5   | 3.112  | 3.56  |
| COMMD6   | 1.138  | 34.34 |
| COMMD7   | 1.464  | 11.22 |
| COMMD8   | 1.412  | 1.48  |
| COMMD9   | 1.286  | 13.07 |
| COMP     | 2.452  | 0     |
| COMT     | 1.559  | 12.06 |
| COMTD1   | 0.975  | 1.63  |
| COP1     | 1.152  | 16.06 |
| COPA     | 5.183  | 33.58 |
| COPB1    | 3.775  | 26.47 |
| COPB2    | 3.062  | 13.02 |
| COPE     | 2.371  | 40.1  |
| COPG     | 3.074  | 18.34 |
| COPG2    | 3.405  | 2.12  |
| COPS2    | 1.947  | 22.61 |
| COPS3    | 1.636  | 35.68 |
| COPS4    | 1.748  | 5.55  |
| COPS5    | 1.652  | 14.61 |
| COPS6    | 2.852  | 5.2   |
| COPS7A   | 1.795  | 4.03  |
| COPS7B   | 1.977  | 9.46  |

|         |       |        |
|---------|-------|--------|
| COPS8   | 2.996 | 7.2    |
| COPZ1   | 1.897 | 19.24  |
| COPZ2   | 0.9   | 0.11   |
| COQ10A  | 1.568 | 3.6    |
| COQ10B  | 1.974 | 5.36   |
| COQ2    | 1.538 | 0.77   |
| COQ3    | 1.259 | 0.39   |
| COQ4    | 1.548 | 15.28  |
| COQ5    | 1.496 | 4.23   |
| COQ6    | 1.976 | 4.11   |
| COQ7    | 2.588 | 0.68   |
| COQ9    | 1.616 | 2.2    |
| CORIN   | 4.942 | 0      |
| CORO1A  | 3.645 | 57.19  |
| CORO1B  | 2.012 | 14.35  |
| CORO1C  | 3.815 | 7.88   |
| CORO2A  | 2.509 | 0.08   |
| CORO2B  | 3.302 | 18.18  |
| CORO6   | 1.844 | 4.45   |
| CORO7   | 3.444 | 17.32  |
| CORT    | 0.935 | 0.32   |
| COTL1   | 1.827 | 13.54  |
| COTL1P2 | 2.179 | 0.04   |
| COVA1   | 4.319 | 0.48   |
| COX1    | 1.542 | 0      |
| COX10   | 3     | 1.42   |
| COX11   | 2.703 | 1.29   |
| COX11P  | 0.835 | 0.83   |
| COX15   | 5.706 | 1.04   |
| COX17   | 0.423 | 6.08   |
| COX17P  | 0.192 | 2.58   |
| COX18   | 4.523 | 2.06   |
| COX19   | 7.215 | 7.42   |
| COX2    | 0.684 | 0      |
| COX3    | 0.781 | 0      |
| COX4I1  | 1.343 | 251.58 |
| COX4I2  | 0.684 | 0      |
| COX4NB  | 1.911 | 4.56   |
| COX5A   | 0.644 | 44.4   |
| COX5AP1 | 0.449 | 4.18   |
| COX5AP2 | 0.571 | 2.59   |
| COX5B   | 0.505 | 114.22 |
| COX5BL1 | 0.466 | 4.04   |
| COX5BL7 | 0.388 | 0      |
| COX6A1  | 0.548 | 115.55 |
| COX6A1P | 0.262 | 0.38   |
| COX6A2  | 0.409 | 0      |
| COX6B1  | 0.558 | 96.81  |
| COX6B2  | 1.663 | 0      |
| COX6BP1 | 1.432 | 0.83   |

|         |       |        |
|---------|-------|--------|
| COX6BP2 | 0.145 | 0      |
| COX6BP3 | 0.493 | 0      |
| COX6C   | 0.425 | 80.78  |
| COX6CP1 | 0.215 | 13.81  |
| COX6CP2 | 0.225 | 0      |
| COX7A1  | 0.762 | 0.52   |
| COX7A2  | 0.47  | 94.3   |
| COX7A2L | 1.117 | 69.44  |
| COX7AP1 | 0.401 | 0      |
| COX7AP2 | 0.321 | 11.4   |
| COX7B   | 0.456 | 68.13  |
| COX7B2  | 0.47  | 0      |
| COX7BP1 | 0.244 | 4.87   |
| COX7BP2 | 0.458 | 0      |
| COX7C   | 0.407 | 210.27 |
| COX7CP1 | 0.19  | 27.08  |
| COX8A   | 0.507 | 137.58 |
| COX8B   | 3.556 | 0      |
| COX8C   | 0.531 | 0.19   |
| CP      | 3.323 | 0.03   |
| CP110   | 5.474 | 1.9    |
| CPA1    | 2.728 | 0.04   |
| CPA2    | 2.612 | 0.12   |
| CPA3    | 1.633 | 0.12   |
| CPA4    | 5.58  | 0.04   |
| CPA5    | 5.15  | 0.05   |
| CPA6    | 1.861 | 0      |
| CPAMD8  | 5.836 | 0.22   |
| CPB1    | 1.462 | 0      |
| CPB2    | 2.283 | 0.04   |
| CPD     | 8.025 | 1.74   |
| CPE     | 2.431 | 0      |
| CPEB1   | 2.776 | 0      |
| CPEB2   | 5.627 | 0.84   |
| CPEB3   | 5.84  | 1.16   |
| CPEB4   | 6.909 | 4.68   |
| CPLX1   | 2.14  | 0.09   |
| CPLX2   | 4.934 | 0      |
| CPLX3   | 2.012 | 0.05   |
| CPLX4   | 1.946 | 0      |
| CPM     | 7.862 | 23.48  |
| CPN1    | 1.701 | 0      |
| CPN2    | 3.028 | 0      |
| CPNE1   | 2.89  | 24.37  |
| CPNE2   | 3.932 | 25.86  |
| CPNE3   | 4.848 | 9      |
| CPNE4   | 2.576 | 0      |
| CPNE5   | 3.339 | 0.29   |
| CPNE6   | 2.01  | 0      |
| CPNE7   | 2.657 | 5.07   |

|         |        |       |
|---------|--------|-------|
| CPNE8   | 3.461  | 0.12  |
| CPNE9   | 2.049  | 0.04  |
| CPO     | 1.125  | 0     |
| CPOX    | 2.695  | 0.62  |
| CPS1    | 5.745  | 0.53  |
| CPSF1   | 4.494  | 24.2  |
| CPSF1P1 | 3.801  | 1.77  |
| CPSF2   | 5.041  | 1.1   |
| CPSF3   | 2.171  | 8.16  |
| CPSF3L  | 2.639  | 17.74 |
| CPSF4   | 3.554  | 4.24  |
| CPSF6   | 4.719  | 29.63 |
| CPT1A   | 4.531  | 15.59 |
| CPT1B   | 3.121  | 7.35  |
| CPT1C   | 2.743  | 0.07  |
| CPT2    | 3.092  | 1.4   |
| CPVL    | 3.776  | 1.47  |
| CPXCR1  | 1.594  | 0     |
| CPXM1   | 2.39   | 16.06 |
| CPXM2   | 3.724  | 0     |
| CPZ     | 3.114  | 0.76  |
| CR1     | 9.966  | 0.21  |
| CR1L    | 1.793  | 0.11  |
| CR2     | 4.145  | 0.03  |
| CRABP1  | 0.738  | 0     |
| CRABP2  | 0.969  | 0.41  |
| CRADD   | 1.422  | 20.66 |
| CRAMP1L | 7.728  | 13.47 |
| CRAT    | 3.195  | 3.13  |
| CRB1    | 4.932  | 0     |
| CRB2    | 5.64   | 0.28  |
| CRB3    | 1.523  | 0     |
| CRBN    | 2.581  | 16.67 |
| CRCT1   | 0.695  | 0     |
| CREB1   | 4.143  | 10.53 |
| CREB3   | 1.851  | 4.06  |
| CREB3L1 | 2.338  | 0.98  |
| CREB3L2 | 14.906 | 6.47  |
| CREB3L3 | 2.586  | 0     |
| CREB3L4 | 1.747  | 3.29  |
| CREB5   | 17.979 | 5.57  |
| CREBBP  | 9.032  | 38.14 |
| CREBL1  | 5.238  | 8.2   |
| CREBL2  | 3.748  | 0.92  |
| CREBZF  | 7.304  | 11.74 |
| CREG1   | 2.026  | 11.47 |
| CREG2   | 3.173  | 0     |
| CRELD1  | 2.991  | 3.17  |
| CRELD2  | 3.624  | 19.71 |
| CREM    | 6.215  | 0.42  |

|          |        |       |
|----------|--------|-------|
| CRH      | 1.279  | 0     |
| CRHBP    | 1.838  | 0.49  |
| CRHR1    | 2.535  | 0     |
| CRHR2    | 4.224  | 0.03  |
| CRIM1    | 16.492 | 40.62 |
| CRIM2    | 4.104  | 0.89  |
| CRIP1    | 0.414  | 52.1  |
| CRIP2    | 1.206  | 18.21 |
| CRIP3    | 0.654  | 0.15  |
| CRIPAK   | 1.935  | 7.93  |
| CRIPT    | 1.24   | 1.6   |
| CRISP1   | 3.075  | 0     |
| CRISP2   | 1.383  | 0     |
| CRISP3   | 2.107  | 0.47  |
| CRISPLD1 | 4.061  | 0.07  |
| CRISPLD2 | 4.562  | 0.33  |
| CRK      | 4.286  | 5.17  |
| CRKL     | 5.178  | 15.86 |
| CRKRS    | 5.456  | 9.05  |
| CRLF1    | 1.792  | 0     |
| CRLF2    | 0.936  | 0     |
| CRLF3    | 2.854  | 9.46  |
| CRLS1    | 1.155  | 1.8   |
| CRMP1    | 3.507  | 5.62  |
| CRNKL1   | 4.406  | 6.69  |
| CRNN     | 2.066  | 2.54  |
| CROCC    | 6.642  | 4.75  |
| CROP     | 4.011  | 42.33 |
| CROT     | 6.346  | 0.43  |
| CRP      | 2.015  | 0     |
| CRPP1    | 0.825  | 0     |
| CRSP2    | 7.984  | 5.74  |
| CRSP3    | 5.713  | 10.83 |
| CRSP6    | 3.412  | 8.35  |
| CRSP7    | 3.184  | 8.27  |
| CRSP8    | 1.384  | 5.72  |
| CRSP9    | 1.066  | 2.41  |
| CRTAC1   | 2.889  | 0     |
| CRTAM    | 2.422  | 0.04  |
| CRTAP    | 6.622  | 10.07 |
| CRTC1    | 3.216  | 2.37  |
| CRTC2    | 5.225  | 53.69 |
| CRTC3    | 2.217  | 5.04  |
| CRX      | 4.461  | 0     |
| CRY1     | 2.985  | 16.54 |
| CRY2     | 4.129  | 8.84  |
| CRYAA    | 1.114  | 0     |
| CRYAB    | 0.691  | 0     |
| CRYBA1   | 0.975  | 3.15  |
| CRYBA2   | 0.945  | 0     |

|          |        |        |
|----------|--------|--------|
| CRYBA4   | 0.807  | 0.12   |
| CRYBB1   | 0.921  | 0.11   |
| CRYBB2   | 0.722  | 0.27   |
| CRYBB2P1 | 13.582 | 0.52   |
| CRYBB3   | 0.853  | 0.12   |
| CRYGA    | 0.697  | 0      |
| CRYGB    | 0.629  | 0      |
| CRYGC    | 0.7    | 0      |
| CRYGD    | 0.606  | 0      |
| CRYGEP1  | 4.737  | 0      |
| CRYGFP1  | 2.679  | 0      |
| CRYGGP1  | 0.285  | 0      |
| CRYGN    | 1.704  | 4.47   |
| CRYGS    | 0.842  | 0.83   |
| CRYL1    | 1.528  | 3.82   |
| CRYM     | 1.497  | 0.06   |
| CRYZ     | 1.887  | 1.73   |
| CRYZL1   | 1.711  | 4.16   |
| CS       | 3.399  | 40.08  |
| CSAD     | 2.645  | 10.06  |
| CSAG1    | 1.093  | 0      |
| CSAG2    | 0.788  | 0      |
| CSAG3A   | 0.789  | 0      |
| CSDA     | 1.913  | 659.05 |
| CSDC2    | 2.304  | 0      |
| CSDE1    | 6.143  | 80.57  |
| CSE1L    | 3.561  | 7.53   |
| CSF1     | 4.107  | 0.24   |
| CSF1R    | 6.391  | 8.62   |
| CSF2     | 0.781  | 0      |
| CSF2RA   | 3.153  | 0.13   |
| CSF2RB   | 2.996  | 2.15   |
| CSF2RB2  | 3.194  | 0      |
| CSF3     | 2.084  | 0.04   |
| CSF3R    | 4.705  | 4.77   |
| CSGlcA-T | 7.94   | 7.53   |
| CSH1     | 1.604  | 0      |
| CSH2     | 1.613  | 0      |
| CSHL1    | 1.076  | 0      |
| CSK      | 2.416  | 20.89  |
| CSMD1    | 11.814 | 0.01   |
| CSMD2    | 13.108 | 0.01   |
| CSMD3    | 13.692 | 0.03   |
| CSN1S1   | 1.02   | 0      |
| CSN1S2A  | 0.779  | 0      |
| CSN2     | 1.066  | 0      |
| CSN3     | 0.82   | 0      |
| CSNK1A1  | 5.809  | 29.93  |
| CSNK1A1L | 2.407  | 2.34   |
| CSNK1D   | 9.262  | 50.01  |

|              |       |       |
|--------------|-------|-------|
| CSNK1E       | 6.63  | 45.8  |
| CSNK1G1      | 8.06  | 2.03  |
| CSNK1G2      | 2.635 | 63.34 |
| CSNK1G3      | 4.376 | 2.72  |
| CSNK2A1      | 3.146 | 9.37  |
| CSNK2A1P     | 1.584 | 5.94  |
| CSNK2A2      | 5.318 | 24.78 |
| CSNK2B       | 3.384 | 0.18  |
| CSPG4        | 7.896 | 0.19  |
| CSPG4LYP1    | 4.593 | 0     |
| CSPG4LYP2    | 4.593 | 0     |
| CSPG5        | 1.988 | 0     |
| CSPP1        | 3.715 | 1.39  |
| CSRP1        | 1.817 | 7.84  |
| CSRP2        | 0.901 | 12.4  |
| CSRP2BP      | 4.259 | 0.79  |
| CSRP2P       | 0.754 | 2.49  |
| CSRP3        | 1.353 | 0     |
| CST1         | 0.76  | 0     |
| CST11        | 0.553 | 0     |
| CST2         | 0.694 | 0     |
| CST3         | 0.775 | 15.19 |
| CST4         | 0.736 | 0     |
| CST5         | 0.74  | 0     |
| CST6         | 0.609 | 0     |
| CST7         | 0.928 | 9.92  |
| CST8         | 0.895 | 0     |
| CST9         | 1.592 | 0     |
| CST9L        | 0.902 | 0     |
| CSTA         | 0.828 | 2.04  |
| CSTB         | 0.658 | 28.12 |
| CSTF1        | 2.656 | 8.42  |
| CSTF2        | 2.017 | 2.01  |
| CSTF2T       | 4.11  | 9.05  |
| CSTF3        | 3.711 | 1.73  |
| CSTL1        | 0.736 | 0     |
| CSTP1        | 3.399 | 0     |
| CSTP2        | 3.311 | 0     |
| CT45-1       | 1.008 | 0     |
| CT45-4       | 1.008 | 0     |
| CT45-6       | 1.008 | 0     |
| CT47.13      | 0.9   | 0     |
| CT47.7       | 1.288 | 0     |
| CT47.8       | 1.288 | 0     |
| CTA-126B4.3  | 1.205 | 13.87 |
| CTA-216E10.6 | 4.975 | 1.14  |
| CTA-221G9.4  | 8.164 | 0.2   |
| CTA-246H3.1  | 0.914 | 1.41  |
| CTAG1A       | 0.748 | 0     |
| CTAG1B       | 0.746 | 0     |



|               |         |        |
|---------------|---------|--------|
| CTAG2         | 1.455   | 0      |
| CTAGE1        | 4.315   | 0      |
| CTAGE3        | 2.864   | 0      |
| CTAGE5        | 5.523   | 2.12   |
| CTAGE6        | 5.866   | 1.86   |
| CTAGEP        | 2.473   | 0.12   |
| CTB-1048E9.5  | 1.292   | 14.47  |
| CTBP1         | 5.73    | 19.52  |
| CTBP2         | 6.048   | 10.48  |
| CTBS          | 1.618   | 4.59   |
| CTCF          | 3.787   | 8.88   |
| CTCFL         | 3.456   | 0      |
| CTD-2090I13.4 | 0.309   | 7.68   |
| CTDP1         | 14.1    | 21.71  |
| CTDSP1        | 2.74    | 23.72  |
| CTDSP2        | 5.02    | 59.62  |
| CTDSPL        | 4.455   | 10.77  |
| CTDSPL2       | 3.241   | 12.21  |
| CTF1          | 1.664   | 0.71   |
| CTF2P         | 18.229  | 0.17   |
| CTF8          | 3.538   | 3.78   |
| CTF8P         | 2.737   | 0.14   |
| CTGF          | 2.286   | 328.19 |
| CTGLF1        | 2.42    | 0      |
| CTGLF10P      | 26.47   | 0      |
| CTGLF11P      | 28.489  | 0.02   |
| CTGLF2        | 7.113   | 0.07   |
| CTGLF4        | 27.04   | 0.01   |
| CTGLF5        | 149.506 | 0.05   |
| CTGLF6        | 3.817   | 0.57   |
| CTGLF7        | 55.553  | 0.06   |
| CTGLF8P       | 2.631   | 0      |
| CTGLF9P       | 12.324  | 0.1    |
| CTH           | 1.805   | 0.11   |
| CTHRC1        | 1.22    | 9.24   |
| CTLA4         | 3.23    | 0.4    |
| CTNNA1        | 3.761   | 19.42  |
| CTNNA2        | 3.842   | 0      |
| CTNNA3        | 3.02    | 0      |
| CTNNAL1       | 2.695   | 17.58  |
| CTNNAP1       | 3.42    | 2.11   |
| CTNNB1        | 4.198   | 46.15  |
| CTNNBIP1      | 2.995   | 14.04  |
| CTNNBL1       | 1.888   | 9.28   |
| CTNND1        | 7.311   | 42.25  |
| CTNND2        | 5.436   | 0.02   |
| CTNS          | 4.186   | 15.53  |
| CTPS          | 2.756   | 11.09  |
| CTPS2         | 4.151   | 2.45   |
| CTR9          | 4.317   | 1.7    |

|           |        |       |
|-----------|--------|-------|
| CTRB1     | 0.844  | 0     |
| CTRB2     | 0.858  | 0     |
| CTRC      | 0.899  | 0.99  |
| CTRL      | 1.169  | 6.85  |
| CTSA      | 1.814  | 7.8   |
| CTSB      | 4.064  | 30.33 |
| CTSC      | 7.619  | 1.2   |
| CTSD      | 2.12   | 28.33 |
| CTSE      | 3.312  | 0.09  |
| CTSF      | 2.014  | 5.7   |
| CTSG      | 0.924  | 5.67  |
| CTSH      | 1.525  | 2.14  |
| CTSK      | 1.702  | 2.84  |
| CTSL1     | 1.821  | 1.09  |
| CTSL2     | 1.496  | 0     |
| CTSLL2    | 16.299 | 0     |
| CTSLL3    | 3.168  | 0     |
| CTSO      | 2.933  | 1.58  |
| CTSS      | 4.1    | 11.92 |
| CTSW      | 1.294  | 6.96  |
| CTSZ      | 1.495  | 25.54 |
| CTTN      | 4.662  | 0.09  |
| CTTNBP2   | 11.94  | 0     |
| CTTNBP2NL | 4.471  | 7.28  |
| CTXN1     | 1.238  | 0     |
| CTXN3     | 0.246  | 0     |
| CUBN      | 11.344 | 0.33  |
| CUEDC1    | 2.193  | 1.35  |
| CUEDC2    | 1.122  | 22.31 |
| CUGBP1    | 7.276  | 43.47 |
| CUGBP2    | 18.573 | 26.23 |
| CUL1      | 6.418  | 9.14  |
| CUL2      | 2.889  | 5.54  |
| CUL3      | 6.788  | 16.4  |
| CUL4A     | 4.58   | 8.32  |
| CUL4B     | 3.493  | 5.56  |
| CUL5      | 6.621  | 7.73  |
| CUL7      | 5.471  | 2.93  |
| CUTA      | 2.871  | 11.34 |
| CUTC      | 1.318  | 3     |
| CUTL1     | 14.819 | 5.22  |
| CUTL2     | 6.841  | 0.06  |
| CUZD1     | 2.897  | 0.11  |
| CWF19L1   | 3.747  | 15.37 |
| CWF19L2   | 2.92   | 2.64  |
| CX3CL1    | 3.273  | 0     |
| CX3CR1    | 3.108  | 0.51  |
| CX40.1    | 1.58   | 0.06  |
| CX62      | 1.632  | 0     |
| CXADR     | 2.482  | 0     |

|          |       |        |
|----------|-------|--------|
| CXCL1    | 1.103 | 0.18   |
| CXCL10   | 1.173 | 0      |
| CXCL11   | 1.489 | 0      |
| CXCL12   | 5.32  | 0.05   |
| CXCL13   | 1.201 | 0      |
| CXCL14   | 1.969 | 0      |
| CXCL16   | 2.211 | 7.16   |
| CXCL2    | 1.116 | 0.18   |
| CXCL3    | 1.159 | 0.52   |
| CXCL5    | 2.458 | 0      |
| CXCL6    | 1.519 | 0      |
| CXCL9    | 2.545 | 0      |
| CXCR3    | 1.624 | 6.83   |
| CXCR4    | 3.049 | 567.92 |
| CXCR6    | 1.953 | 0.3    |
| CXCR7    | 2.034 | 0.68   |
| CXorf1   | 2.447 | 0      |
| CXorf12  | 1.411 | 0.7    |
| CXorf15  | 2.045 | 1.4    |
| CXorf2   | 1.525 | 0      |
| CXorf20  | 4.611 | 0      |
| CXorf21  | 1.808 | 5.36   |
| CXorf22  | 3.606 | 0      |
| CXorf23  | 2.799 | 0.68   |
| CXorf26  | 1.195 | 9.85   |
| CXorf27  | 0.427 | 0      |
| CXorf31  | 0.522 | 0      |
| CXorf34  | 3.325 | 2.23   |
| CXorf36  | 2.501 | 0      |
| CXorf38  | 1.341 | 3.32   |
| CXorf39  | 3.001 | 3.99   |
| CXorf40A | 1.366 | 5.79   |
| CXorf40B | 1.86  | 21.92  |
| CXorf41  | 1.652 | 0      |
| CXorf42  | 0.366 | 1.35   |
| CXorf43  | 2.87  | 0      |
| CXorf45  | 2.052 | 3.72   |
| CXorf48  | 2.907 | 0      |
| CXorf50  | 1.95  | 0      |
| CXorf55  | 2.46  | 0      |
| CXorf56  | 1.092 | 10.97  |
| CXorf57  | 3.81  | 0.18   |
| CXorf58  | 1.547 | 0      |
| CXorf59  | 1.956 | 0      |
| CXorf6   | 4.598 | 0.58   |
| CXorf9   | 2.626 | 13.41  |
| CXXC1    | 2.444 | 10.77  |
| CXXC4    | 0.761 | 0      |
| CXXC5    | 2.589 | 1.56   |
| CXXC6    | 8.497 | 0.04   |

|          |        |       |
|----------|--------|-------|
| CXYorf11 | 2.303  | 0.04  |
| CXYorf2  | 0.902  | 12.5  |
| CXYorf3  | 3.21   | 49.1  |
| CYB561   | 3.539  | 3.97  |
| CYB561D1 | 3.326  | 2.65  |
| CYB561D2 | 1.204  | 3.54  |
| CYB5A    | 1.206  | 1.56  |
| CYB5B    | 4.286  | 3.93  |
| CYB5D1   | 3.497  | 4.69  |
| CYB5D2   | 1.91   | 1.4   |
| CYB5P3   | 0.398  | 0     |
| CYB5P4   | 0.399  | 0     |
| CYB5R1   | 1.643  | 6.27  |
| CYB5R2   | 1.341  | 0.15  |
| CYB5R3   | 2.209  | 39.14 |
| CYB5R4   | 2.247  | 1.67  |
| CYBA     | 4.222  | 57.55 |
| CYBASC3  | 2.959  | 9.13  |
| CYBB     | 4.268  | 2.92  |
| CYBRD1   | 4.236  | 0.98  |
| CYC1     | 1.171  | 17.4  |
| CYCS     | 11.017 | 1.58  |
| CYCSL1   | 0.633  | 0     |
| CYCSP1   | 0.315  | 0     |
| CYCSP10  | 0.308  | 0.32  |
| CYCSP11  | 0.315  | 0     |
| CYCSP12  | 0.304  | 0     |
| CYCSP14  | 0.297  | 0     |
| CYCSP16  | 0.171  | 0     |
| CYCSP17  | 0.315  | 0     |
| CYCSP18  | 0.472  | 0     |
| CYCSP19  | 0.634  | 0.31  |
| CYCSP2   | 0.313  | 1.58  |
| CYCSP20  | 0.63   | 0     |
| CYCSP22  | 0.313  | 0     |
| CYCSP23  | 0.319  | 0.62  |
| CYCSP24  | 0.316  | 0     |
| CYCSP25  | 0.32   | 0.31  |
| CYCSP26  | 0.325  | 0     |
| CYCSP27  | 0.298  | 0     |
| CYCSP28  | 0.326  | 0     |
| CYCSP29  | 0.318  | 0     |
| CYCSP3   | 0.318  | 4.67  |
| CYCSP30  | 3.768  | 0     |
| CYCSP32  | 0.318  | 0     |
| CYCSP33  | 0.318  | 0     |
| CYCSP34  | 0.313  | 0.64  |
| CYCSP35  | 0.313  | 0     |
| CYCSP38  | 0.274  | 0     |
| CYCSP39  | 0.309  | 0     |

|          |         |       |
|----------|---------|-------|
| CYCSP4   | 0.277   | 0     |
| CYCSP40  | 0.243   | 3.66  |
| CYCSP41  | 0.193   | 0     |
| CYCSP42  | 0.259   | 0     |
| CYCSP43  | 0.312   | 0     |
| CYCSP44  | 0.32    | 0     |
| CYCSP45  | 0.318   | 3.11  |
| CYCSP46  | 1.061   | 0.19  |
| CYCSP48  | 0.277   | 0     |
| CYCSP5   | 0.298   | 0     |
| CYCSP51  | 0.318   | 1.56  |
| CYCSP52  | 0.717   | 7.17  |
| CYCSP53  | 0.28    | 0     |
| CYCSP6   | 0.311   | 0     |
| CYCSP7   | 0.304   | 0     |
| CYCSP8   | 0.312   | 0     |
| CYFIP1   | 5.683   | 22.28 |
| CYFIP2   | 7.137   | 3.84  |
| CYGB     | 2.572   | 50.5  |
| CYHR1    | 1.19    | 4.57  |
| CYLC1    | 2.268   | 0     |
| CYLC2    | 2.101   | 0     |
| CYLD     | 6.782   | 16.76 |
| CYorf14  | 1.495   | 0.6   |
| CYorf15A | 1.97    | 6.73  |
| CYorf15B | 5.52    | 3.1   |
| CYorf16  | 0.467   | 0     |
| CYP11A1  | 1.816   | 0     |
| CYP11B1  | 3.535   | 0     |
| CYP11B2  | 2.936   | 0     |
| CYP17A1  | 1.87    | 0     |
| CYP19A1  | 3.098   | 0     |
| CYP1A1   | 2.601   | 0.23  |
| CYP1A2   | 3.127   | 0     |
| CYP1B1   | 5.122   | 0.04  |
| CYP20A1  | 2.687   | 0.92  |
| CYP21A1P | 4.043   | 0     |
| CYP21A2  | 6.342   | 0.02  |
| CYP24A1  | 3.274   | 0     |
| CYP26A1  | 2.684   | 0     |
| CYP26B1  | 4.528   | 0     |
| CYP26C1  | 1.569   | 0     |
| CYP27A1  | 2.059   | 0.1   |
| CYP27B1  | 2.487   | 0.36  |
| CYP2A13  | 1.747   | 0     |
| CYP2A6   | 1.751   | 0     |
| CYP2A7   | 2.471   | 0     |
| CYP2A7P1 | 119.855 | 0     |
| CYP2B6   | 3.052   | 0     |
| CYP2B7P1 | 29.298  | 0     |

|          |        |      |
|----------|--------|------|
| CYP2C18  | 1.995  | 0    |
| CYP2C19  | 1.473  | 0    |
| CYP2C8   | 1.852  | 0.27 |
| CYP2C9   | 1.835  | 0    |
| CYP2D6   | 1.659  | 2.45 |
| CYP2D7P1 | 6.042  | 1.19 |
| CYP2D8P1 | 5.322  | 0.52 |
| CYP2E1   | 1.667  | 0.47 |
| CYP2F1   | 1.826  | 0    |
| CYP2F1P  | 8.097  | 0.31 |
| CYP2G1P  | 8.934  | 0    |
| CYP2G2P  | 11.993 | 0    |
| CYP2J2   | 1.857  | 0    |
| CYP2R1   | 1.619  | 3.36 |
| CYP2S1   | 2.621  | 0    |
| CYP2T2P  | 2.898  | 0.11 |
| CYP2T3P  | 2.635  | 0.04 |
| CYP2U1   | 4.752  | 0.17 |
| CYP2W1   | 4.608  | 0.11 |
| CYP39A1  | 2.272  | 0    |
| CYP3A    | 0.1    | 0    |
| CYP3A4   | 5.536  | 0.07 |
| CYP3A43  | 5.95   | 0.38 |
| CYP3A5   | 3.414  | 0    |
| CYP3A5P1 | 30.198 | 0.01 |
| CYP3A5P2 | 8.486  | 0    |
| CYP3A7   | 4.16   | 0    |
| CYP46A1  | 2.077  | 0    |
| CYP4A11  | 2.813  | 0    |
| CYP4A22  | 1.668  | 0    |
| CYP4B1   | 2.147  | 0    |
| CYP4F11  | 3.044  | 0    |
| CYP4F12  | 1.693  | 0    |
| CYP4F2   | 2.36   | 0    |
| CYP4F3   | 5.052  | 0.31 |
| CYP4F3LP | 0.998  | 0.3  |
| CYP4F8   | 1.846  | 0.05 |
| CYP4V2   | 4.699  | 0.8  |
| CYP4X1   | 2.357  | 0    |
| CYP4Z1   | 1.907  | 0    |
| CYP4Z2P  | 44.85  | 0    |
| CYP51A1  | 6.75   | 0.66 |
| CYP51P1  | 1.939  | 0.41 |
| CYP51P2  | 0.134  | 0    |
| CYP7A1   | 2.875  | 0    |
| CYP7B1   | 2.232  | 0    |
| CYP8B1   | 3.95   | 0.03 |
| CYR61    | 2.019  | 0    |
| CYS1     | 0.779  | 0    |
| CYSLTR1  | 1.514  | 2.68 |

|           |       |        |
|-----------|-------|--------|
| CYSLTR2   | 2.548 | 0.54   |
| CYTB      | 1.135 | 0      |
| CYTL1     | 1.001 | 9.39   |
| CYR1      | 3.079 | 0      |
| D15Wsu75e | 0.745 | 3.19   |
| D21S2056E | 2.985 | 2.22   |
| D2HGDH    | 2.893 | 20.76  |
| D4S234E   | 5.135 | 0.04   |
| D4ST1     | 2.142 | 2.36   |
| D6S2723E  | 1.035 | 0      |
| DAAM1     | 4.256 | 1.51   |
| DAAM2     | 6.215 | 1.41   |
| DAB1      | 2.58  | 0      |
| DAB2      | 3.257 | 2.4    |
| DAB2IP    | 5.906 | 1.34   |
| DACH1     | 5.239 | 0.15   |
| DACH2     | 2.232 | 0      |
| DACT1     | 3.76  | 0.29   |
| DACT2     | 2.942 | 0      |
| DACT3     | 2.526 | 0.28   |
| DAD1      | 0.683 | 11.87  |
| DAG1      | 5.492 | 1.42   |
| DAGLA     | 5.752 | 0.48   |
| DAGLB     | 5.872 | 35.5   |
| DAK       | 4.241 | 3.5    |
| DALRD3    | 2.684 | 5.64   |
| DAND5     | 1.732 | 0      |
| DAO       | 1.573 | 0      |
| DAOA      | 0.742 | 0      |
| DAP       | 2.23  | 17.22  |
| DAP3      | 2.028 | 23.51  |
| DAPK1     | 5.938 | 0.46   |
| DAPK2     | 2.628 | 0.34   |
| DAPK3     | 2.105 | 17.34  |
| DAPP1     | 2.955 | 1.88   |
| DARC      | 1.301 | 0      |
| DARS      | 2.322 | 7.63   |
| DARS2     | 3.187 | 0.71   |
| DAXX      | 7.41  | 0      |
| DAZ1      | 3.836 | 0      |
| DAZ2      | 5.875 | 0      |
| DAZ3      | 3.391 | 0      |
| DAZ4      | 4.031 | 0      |
| DAZAP1    | 8.06  | 19.72  |
| DAZAP2    | 2.431 | 101.75 |
| DAZL      | 3.05  | 0      |
| DBC1      | 3.158 | 0      |
| DBF4      | 7.814 | 0.65   |
| DBF4B     | 4.989 | 0.53   |
| DBH       | 2.76  | 1.04   |

|         |        |       |
|---------|--------|-------|
| DBI     | 0.7    | 29.54 |
| DBIL1   | 0.47   | 0     |
| DBIL2   | 0.547  | 8.86  |
| DBN1    | 3.615  | 4.41  |
| DBNDD1  | 2.075  | 1.39  |
| DBNDD2  | 4.302  | 1.77  |
| DBNL    | 4.354  | 8.43  |
| DBP     | 1.467  | 1.22  |
| DBR1    | 2.65   | 3.48  |
| DBT     | 3.538  | 1.17  |
| DBX1    | 1.149  | 0     |
| DBX2    | 2.722  | 0     |
| DC2     | 1.08   | 16.21 |
| DCAKD   | 2.03   | 3.85  |
| DCAL1   | 0.635  | 0.47  |
| DCAMKL1 | 5.703  | 0     |
| DCAMKL2 | 3.657  | 0.03  |
| DCAMKL3 | 5.747  | 0     |
| DCBLD1  | 2.22   | 1.83  |
| DCBLD2  | 6.093  | 0.26  |
| DCC     | 4.609  | 0     |
| DCC1    | 2.213  | 0.31  |
| DCD     | 0.517  | 0     |
| DCDC1   | 1.706  | 0     |
| DCDC2   | 4.604  | 0     |
| DCDC2B  | 1.05   | 0.1   |
| DCDC5   | 4.741  | 0     |
| DCHS1   | 10.756 | 5.21  |
| DCHS2   | 11.84  | 0     |
| DCI     | 1.029  | 9.04  |
| DCK     | 2.462  | 15.23 |
| DCLRE1A | 4.216  | 0.23  |
| DCLRE1B | 3.651  | 0.92  |
| DCLRE1C | 4.418  | 5.19  |
| DCN     | 3.504  | 0     |
| DCP1A   | 4.013  | 18.54 |
| DCP1B   | 2.092  | 0.85  |
| DCP2    | 9.248  | 3.81  |
| DCPS    | 1.479  | 2.54  |
| DCST1   | 2.279  | 0.13  |
| DCST2   | 2.485  | 0.08  |
| DCT     | 2.291  | 0     |
| DCTD    | 2.324  | 13.11 |
| DCTN1   | 5.011  | 11.25 |
| DCTN2   | 2.299  | 35.85 |
| DCTN3   | 1.305  | 13.19 |
| DCTN4   | 4.481  | 90.76 |
| DCTN5   | 3.526  | 18.24 |
| DCTN6   | 1.234  | 22.05 |
| DCUN1D1 | 3.152  | 3.17  |



|          |        |        |
|----------|--------|--------|
| DCUN1D2  | 5.471  | 2.55   |
| DCUN1D3  | 2.967  | 1.07   |
| DCUN1D4  | 4.265  | 1.53   |
| DCUN1D5  | 1.249  | 5.07   |
| DCX      | 10.08  | 0      |
| DCXR     | 0.829  | 6.68   |
| DDAH1    | 3.92   | 0      |
| DDAH2    | 3.993  | 0      |
| DDB1     | 4.217  | 53.87  |
| DDB2     | 2.318  | 16.86  |
| DDC      | 5.174  | 5.72   |
| DDEF1    | 6.042  | 9.38   |
| DDEF1IT1 | 1.179  | 0      |
| DDEF2    | 5.711  | 1.19   |
| DDEFL1   | 4.05   | 0.17   |
| DDHD1    | 3.548  | 5.64   |
| DDHD2    | 3.31   | 3.86   |
| DDI1     | 2.589  | 0      |
| DDI2     | 1.759  | 9      |
| DDIT3    | 0.911  | 26.07  |
| DDIT4    | 1.752  | 354.75 |
| DDIT4L   | 2.592  | 0.15   |
| DDN      | 3.744  | 0.11   |
| DDO      | 1.709  | 1.33   |
| DDOST    | 2.345  | 42.19  |
| DDPP     | 0.295  | 0.67   |
| DDR1     | 12.999 | 2.41   |
| DDR2     | 3.252  | 0      |
| DDT      | 0.666  | 29.86  |
| DDX1     | 2.706  | 5.38   |
| DDX10    | 3.193  | 2.88   |
| DDX11    | 4.048  | 12.22  |
| DDX12    | 4.417  | 3.27   |
| DDX17    | 8.259  | 57.79  |
| DDX18    | 3.765  | 4.68   |
| DDX18P1  | 2.373  | 0.5    |
| DDX19A   | 2.903  | 7.22   |
| DDX19B   | 2.347  | 11.34  |
| DDX20    | 3.446  | 5.23   |
| DDX21    | 4.603  | 15.33  |
| DDX23    | 3.267  | 6.02   |
| DDX24    | 3.357  | 49.45  |
| DDX25    | 1.691  | 0.06   |
| DDX26B   | 3.793  | 3.94   |
| DDX27    | 2.643  | 15.08  |
| DDX28    | 2.786  | 5.79   |
| DDX31    | 3.786  | 1.12   |
| DDX39    | 4.876  | 29.83  |
| DDX3X    | 5.683  | 53.62  |
| DDX3Y    | 4.41   | 41.6   |

|           |       |        |
|-----------|-------|--------|
| DDX4      | 2.428 | 0      |
| DDX41     | 2.104 | 19.61  |
| DDX42     | 4.228 | 50.76  |
| DDX43     | 2.291 | 0.04   |
| DDX46     | 5.679 | 7.49   |
| DDX47     | 2.351 | 29.62  |
| DDX49     | 1.82  | 13.92  |
| DDX5      | 3.985 | 362.38 |
| DDX50     | 2.538 | 6.82   |
| DDX51     | 2.802 | 4.38   |
| DDX52     | 4.137 | 3.59   |
| DDX53     | 2.12  | 0      |
| DDX54     | 4.378 | 18.66  |
| DDX55     | 2.622 | 4.07   |
| DDX56     | 5.228 | 7.16   |
| DDX58     | 4.756 | 0.75   |
| DDX59     | 5.113 | 12.99  |
| DDX6      | 5.753 | 45.84  |
| DEADC1    | 3.548 | 5.19   |
| DEAF1     | 2.716 | 16.14  |
| DEC1      | 1.251 | 0      |
| DECR1     | 1.251 | 7.59   |
| DECR2     | 1.583 | 3.25   |
| DEDD      | 2.438 | 15.3   |
| DEDD2     | 1.887 | 13.79  |
| DEF6      | 2.839 | 26.56  |
| DEFA1     | 0.486 | 3.26   |
| DEFA3     | 0.487 | 1.01   |
| DEFA4     | 0.542 | 6.21   |
| DEFA5     | 0.449 | 0      |
| DEFA6     | 0.465 | 0      |
| DEFA8P    | 4.58  | 0      |
| DEFB1     | 0.463 | 0      |
| DEFB103A  | 0.518 | 0      |
| DEFB104A  | 0.281 | 0      |
| DEFB104B  | 0.281 | 0      |
| DEFB105A  | 0.237 | 0      |
| DEFB105B  | 0.237 | 0      |
| DEFB106A  | 0.303 | 0      |
| DEFB106B  | 0.303 | 0      |
| DEFB107A  | 0.389 | 0      |
| DEFB107B  | 0.389 | 0      |
| DEFB108B  | 0.222 | 0      |
| DEFB108P1 | 2.993 | 0      |
| DEFB109   | 0.264 | 0      |
| DEFB110   | 0.189 | 0      |
| DEFB111   | 0.384 | 0      |
| DEFB112   | 0.342 | 0      |
| DEFB113   | 0.249 | 0      |
| DEFB114   | 0.21  | 0      |

|           |        |        |
|-----------|--------|--------|
| DEFB115   | 0.267  | 0      |
| DEFB116   | 0.309  | 0      |
| DEFB118   | 0.589  | 0      |
| DEFB119   | 1.036  | 0      |
| DEFB121   | 0.282  | 0      |
| DEFB122   | 14.448 | 0      |
| DEFB123   | 0.378  | 0      |
| DEFB124   | 0.216  | 0      |
| DEFB125   | 0.709  | 0      |
| DEFB126   | 0.413  | 0      |
| DEFB127   | 0.439  | 0      |
| DEFB128   | 0.282  | 0      |
| DEFB129   | 0.672  | 0      |
| DEFB130   | 0.24   | 0      |
| DEFB131   | 0.213  | 0      |
| DEFB134   | 0.201  | 0      |
| DEFB136   | 0.198  | 0      |
| DEFB137   | 0.221  | 0      |
| DEFB4     | 0.336  | 0      |
| DEGS1     | 2.632  | 6.31   |
| DEGS2     | 1.349  | 2.35   |
| DEK       | 3.144  | 21.06  |
| deltaNEMO | 8.886  | 8.97   |
| DENND1A   | 5.363  | 2.28   |
| DENND1B   | 2.197  | 0.5    |
| DENND1C   | 2.795  | 1.48   |
| DENND2A   | 7.47   | 0.01   |
| DENND2C   | 4.685  | 0.09   |
| DENND2D   | 2.042  | 2.23   |
| DENND3    | 9.178  | 154.02 |
| DENND4A   | 6.585  | 11.93  |
| DENND4B   | 5.923  | 15.18  |
| DENND4C   | 5.507  | 7.46   |
| DENR      | 3.061  | 12.7   |
| DEPDC1    | 3.286  | 0.21   |
| DEPDC1B   | 2.467  | 0.28   |
| DEPDC2    | 5.414  | 0.04   |
| DEPDC4    | 1.155  | 0      |
| DEPDC5    | 5.952  | 1.92   |
| DEPDC6    | 2.167  | 0.23   |
| DEPDC7    | 1.994  | 0      |
| DERA      | 1.528  | 4.53   |
| DERL1     | 3.034  | 18.46  |
| DERL2     | 1.127  | 13.34  |
| DERL3     | 5.753  | 1.12   |
| DES       | 2.248  | 0      |
| DET1      | 2.315  | 0.64   |
| DEXI      | 2.272  | 12.85  |
| DFFA      | 4.732  | 1.48   |
| DFFB      | 5.528  | 0.25   |

|         |        |       |
|---------|--------|-------|
| DFNA5   | 4.436  | 1.74  |
| DFNB31  | 4.022  | 0.57  |
| DGAT1   | 1.969  | 13.47 |
| DGAT2   | 2.42   | 0.77  |
| DGAT2L3 | 0.987  | 0     |
| DGAT2L4 | 2.124  | 0.04  |
| DGAT2L6 | 1.708  | 0.06  |
| DGAT2L7 | 1.5    | 0     |
| DGCR14  | 1.697  | 10.96 |
| DGCR2   | 4.418  | 4.5   |
| DGCR5   | 5.427  | 0     |
| DGCR6   | 1.171  | 3.13  |
| DGCR6L  | 1.159  | 12.47 |
| DGCR8   | 4.441  | 7.07  |
| DGKA    | 3.325  | 21.3  |
| DGKB    | 9.706  | 0     |
| DGKD    | 11.352 | 35.02 |
| DGKE    | 2.562  | 2.59  |
| DGKG    | 3.76   | 0.03  |
| DGKH    | 4.902  | 0.81  |
| DGKI    | 9.56   | 0.03  |
| DGKK    | 3.917  | 0     |
| DGKQ    | 4.636  | 3.09  |
| DGKZ    | 4.111  | 6.93  |
| DGUOK   | 1.144  | 7.18  |
| DHCR24  | 4.27   | 0.04  |
| DHCR7   | 2.584  | 2.11  |
| DHDDS   | 3.538  | 5     |
| DHDH    | 1.084  | 0.09  |
| DHFR    | 3.917  | 0.91  |
| DHFRL1  | 3.756  | 0.24  |
| DHFRP1  | 0.967  | 0     |
| DHH     | 1.936  | 0     |
| DHODH   | 3.132  | 0.53  |
| DHPS    | 1.476  | 8.84  |
| DHRS1   | 1.47   | 2.36  |
| DHRS12  | 3.694  | 8.03  |
| DHRS13  | 1.908  | 1.04  |
| DHRS2   | 2.311  | 0     |
| DHRS3   | 2.613  | 68.69 |
| DHRS4   | 1.278  | 5.42  |
| DHRS4L2 | 1.269  | 3.28  |
| DHRS7   | 1.282  | 5.79  |
| DHRS7B  | 1.375  | 1.44  |
| DHRS7C  | 0.978  | 0     |
| DHRS9   | 3.362  | 0.15  |
| DHRSX   | 2.537  | 1.68  |
| DHTKD1  | 5.159  | 1.92  |
| DHX15   | 4.598  | 40.01 |
| DHX16   | 10.131 | 0.09  |

|               |        |       |
|---------------|--------|-------|
| DHX29         | 4.473  | 7.21  |
| DHX30         | 4.675  | 21.39 |
| DHX32         | 3.07   | 0.42  |
| DHX33         | 4.076  | 1.22  |
| DHX34         | 5.17   | 0.92  |
| DHX35         | 3.301  | 4.44  |
| DHX36         | 3.601  | 9.64  |
| DHX37         | 4.549  | 6.42  |
| DHX38         | 4.98   | 27.26 |
| DHX40         | 3.656  | 16.13 |
| DHX40P        | 39.226 | 0.29  |
| DHX57         | 4.83   | 2.2   |
| DHX8          | 4.2    | 19.03 |
| DHX9          | 4.198  | 41.41 |
| DHX9P         | 4.164  | 6.58  |
| DIABLO        | 1.669  | 12.68 |
| DIAPH1        | 5.772  | 34.27 |
| DIAPH2        | 9.477  | 0.78  |
| DIAPH3        | 2.691  | 0     |
| DICER1        | 10.413 | 9.33  |
| DIDO1         | 14.243 | 6.78  |
| DIMT1L        | 1.557  | 5.91  |
| DIO1          | 3.161  | 0     |
| DIO2          | 7.233  | 0     |
| DIO3          | 2.1    | 0     |
| DIO3OS        | 3.454  | 0     |
| DIP           | 4.316  | 11.53 |
| DIP2A         | 6.995  | 2.66  |
| DIP2B         | 8.715  | 8.72  |
| DIP2C         | 6.592  | 7.52  |
| DIRAS1        | 3.671  | 14.26 |
| DIRAS2        | 4.107  | 0     |
| DIRAS3        | 1.631  | 0     |
| DIRC1         | 1.454  | 0     |
| DIRC2         | 2.106  | 2.2   |
| DIS3          | 7.306  | 2.85  |
| DIS3L         | 3.658  | 1.43  |
| DIS3L2        | 3.702  | 7.7   |
| DISC1         | 8.98   | 0.92  |
| DISC2         | 3.892  | 0.08  |
| DISP1         | 4.743  | 0.04  |
| DISP2         | 5.032  | 0.16  |
| DIXDC1        | 6.106  | 0.02  |
| dJ222E13.2    | 11.1   | 0.92  |
| dJ341D10.1    | 2.11   | 0.14  |
| dJ507I15.1    | 0.773  | 0.51  |
| dJ612B15.1    | 11.417 | 0.11  |
| DKC1          | 2.454  | 16.65 |
| DKFZp313A2432 | 5.235  | 1.68  |
| DKFZP434A0131 | 3.886  | 1.45  |

|                |        |       |
|----------------|--------|-------|
| DKFZP434B0335  | 9.791  | 5.16  |
| DKFZP434B061   | 0.997  | 0     |
| DKFZp434B1231  | 3.926  | 0     |
| DKFZp434E1119  | 0.761  | 0.13  |
| DKFZP434I0714  | 3.505  | 1.87  |
| DKFZp434K1815  | 4.396  | 2.12  |
| DKFZp434K191   | 4.835  | 0     |
| DKFZp434N035   | 1.958  | 0.15  |
| DKFZP434O047   | 0.67   | 0     |
| DKFZP434P211   | 2.459  | 0     |
| DKFZp451A211   | 5.11   | 0.21  |
| DKFZp547H025   | 1.844  | 0     |
| DKFZP547L112   | 1.236  | 0     |
| DKFZP564C196   | 2.242  | 0.44  |
| DKFZP564J0863  | 2.256  | 6.53  |
| DKFZP564J102   | 2.244  | 0     |
| DKFZp564N2472  | 2.54   | 0     |
| DKFZP564O0523  | 3.434  | 5.42  |
| DKFZP564O0823  | 5.039  | 0     |
| DKFZP586H2123  | 2.787  | 0     |
| DKFZp586I1420  | 5.52   | 13.15 |
| DKFZP586P0123  | 6.036  | 1.67  |
| DKFZp666G057   | 3.131  | 0.04  |
| DKFZp667G2110  | 4.785  | 1.37  |
| DKFZp667M2411  | 1.873  | 3.8   |
| DKFZP686A01247 | 5.114  | 0     |
| DKFZp686A1627  | 76.726 | 0.01  |
| DKFZP686C2281  | 3.93   | 0.07  |
| DKFZp686D0972  | 2.793  | 0     |
| DKFZP686E2158  | 0.461  | 12.67 |
| DKFZp686I15217 | 2.469  | 0.12  |
| DKFZp686J0529  | 2.236  | 0     |
| DKFZp686K16132 | 3.223  | 7.06  |
| DKFZP686M0199  | 2.735  | 0     |
| DKFZp686O24166 | 6.382  | 0.14  |
| DKFZp761B107   | 5.585  | 0.04  |
| DKFZp761E198   | 4.17   | 1.48  |
| DKFZp761P0423  | 5.788  | 7.83  |
| DKFZp762E1312  | 3.05   | 2.18  |
| DKFZp779B1540  | 3.732  | 0     |
| DKFZp779B1634  | 2.754  | 0     |
| DKFZP779L1853  | 3.708  | 0.03  |
| DKFZp779O175   | 1.692  | 0.12  |
| DKFZP781G0119  | 5.13   | 0     |
| DKFZp781N1041  | 1.407  | 0     |
| DKK1           | 1.805  | 0.55  |
| DKK2           | 3.637  | 0     |
| DKK3           | 3.016  | 0     |
| DKK4           | 0.818  | 0     |
| DKKL1          | 1.031  | 0     |

|        |        |       |
|--------|--------|-------|
| DKKL2  | 0.698  | 0     |
| DLAT   | 3.3    | 1.08  |
| DLC1   | 8.019  | 0.04  |
| DLD    | 7.158  | 5.45  |
| DLEC1  | 6.063  | 0.2   |
| DLEU1  | 0.874  | 2.27  |
| DLEU2  | 2.768  | 2.04  |
| DLEU2L | 1.657  | 0.6   |
| DLEU7  | 2.092  | 0     |
| DLG1   | 3.043  | 3.64  |
| DLG2   | 7.724  | 0     |
| DLG3   | 5.148  | 9.79  |
| DLG4   | 3.984  | 5.94  |
| DLG5   | 7.101  | 2.36  |
| DLG7   | 2.979  | 0.04  |
| DLGAP1 | 3.417  | 0     |
| DLGAP2 | 10.095 | 0.29  |
| DLGAP3 | 3.587  | 0.05  |
| DLGAP4 | 5.829  | 6.47  |
| DLK1   | 2.48   | 0     |
| DLL1   | 3.077  | 3.6   |
| DLL3   | 2.644  | 0     |
| DLL4   | 3.383  | 0.06  |
| DLST   | 3.46   | 59.45 |
| DLSTP  | 3.01   | 11.87 |
| DLX1   | 4.055  | 0.03  |
| DLX2   | 2.304  | 0.09  |
| DLX3   | 2.602  | 0     |
| DLX4   | 2.16   | 0     |
| DLX5   | 2.848  | 0     |
| DLX6   | 3.582  | 0     |
| DMAP1  | 2.143  | 12.79 |
| DMBT1  | 7.686  | 0     |
| DMBX1  | 3.229  | 0     |
| DMC1   | 2.269  | 0.04  |
| DMD    | 19.358 | 0.01  |
| DMGDH  | 3.083  | 0     |
| DMKN   | 2.014  | 0     |
| DMN    | 10.098 | 0.87  |
| DMP1   | 2.676  | 0     |
| DMPK   | 2.742  | 3.75  |
| DMRT1  | 2.222  | 0     |
| DMRT2  | 3.796  | 0     |
| DMRT3  | 2.184  | 0     |
| DMRTA1 | 2.302  | 0     |
| DMRTA2 | 2.744  | 0     |
| DMRTB1 | 1.907  | 0     |
| DMRTC1 | 1.044  | 0.09  |
| DMRTC2 | 1.821  | 0     |
| DMTF1  | 8.625  | 15.44 |

|         |        |       |
|---------|--------|-------|
| DMWD    | 3.308  | 2.3   |
| DMXL1   | 11.072 | 2.28  |
| DMXL2   | 9.61   | 0.7   |
| DNA2L   | 4.416  | 0.74  |
| DNAH1   | 13.429 | 3.18  |
| DNAH10  | 3.422  | 0     |
| DNAH11  | 28.381 | 0.23  |
| DNAH17  | 4.791  | 1.84  |
| DNAH2   | 13.505 | 0.02  |
| DNAH3   | 12.351 | 0.04  |
| DNAH5   | 13.971 | 0     |
| DNAH7   | 12.388 | 0.05  |
| DNAH8   | 13.86  | 0     |
| DNAH9   | 14.381 | 0     |
| DNAHL1  | 1.846  | 0     |
| DNAI1   | 2.521  | 0     |
| DNAI2   | 2.253  | 0     |
| DNAJA1  | 1.538  | 20.97 |
| DNAJA2  | 1.937  | 15.48 |
| DNAJA3  | 2.687  | 2.47  |
| DNAJA4  | 3.175  | 2.77  |
| DNAJA5  | 6.208  | 1.91  |
| DNAJB1  | 2.233  | 57.33 |
| DNAJB11 | 2.112  | 22.72 |
| DNAJB12 | 6.496  | 12.72 |
| DNAJB13 | 1.875  | 2.8   |
| DNAJB14 | 5.96   | 4.15  |
| DNAJB2  | 4.243  | 12.5  |
| DNAJB4  | 2.24   | 3.45  |
| DNAJB5  | 2.442  | 0.77  |
| DNAJB6  | 10.209 | 11.75 |
| DNAJB7  | 2.578  | 0.73  |
| DNAJB8  | 2.468  | 0     |
| DNAJB9  | 4.742  | 2.06  |
| DNAJC1  | 1.881  | 0.74  |
| DNAJC10 | 4.193  | 4.84  |
| DNAJC11 | 3.197  | 4.43  |
| DNAJC12 | 1.668  | 0     |
| DNAJC13 | 7.595  | 1.82  |
| DNAJC14 | 3.246  | 21    |
| DNAJC15 | 2.776  | 5.2   |
| DNAJC16 | 6.024  | 1.31  |
| DNAJC17 | 0.993  | 2.79  |
| DNAJC18 | 3.539  | 0.42  |
| DNAJC19 | 2.796  | 1.1   |
| DNAJC3  | 1.917  | 8.15  |
| DNAJC4  | 1.904  | 15.02 |
| DNAJC5  | 5.126  | 25.03 |
| DNAJC5B | 1.38   | 0     |
| DNAJC5G | 2.006  | 0     |



|          |        |        |
|----------|--------|--------|
| DNAJC6   | 5.75   | 0.04   |
| DNAJC7   | 1.752  | 17.16  |
| DNAJC8   | 1.479  | 23.21  |
| DNAJC8P1 | 1.577  | 2.07   |
| DNAJC9   | 1.437  | 11.23  |
| DNAL1    | 1.166  | 0.17   |
| DNAL4    | 1.487  | 2.66   |
| DNALI1   | 2.649  | 0      |
| DNAPTP6  | 2.336  | 32.32  |
| DNASE1   | 3.098  | 0.42   |
| DNASE1L1 | 3.69   | 6.03   |
| DNASE1L2 | 1.326  | 0.22   |
| DNASE1L3 | 1.463  | 0      |
| DNASE2   | 2.01   | 1.82   |
| DNASE2B  | 1.625  | 0      |
| DND1     | 1.603  | 5.43   |
| DNER     | 3.257  | 0      |
| DNHD1    | 3.378  | 3.19   |
| DNHD2    | 2.382  | 0      |
| DNM1     | 3.848  | 3.68   |
| DNM1L    | 4.015  | 16.19  |
| DNM2     | 4.651  | 36.76  |
| DNM3     | 7.627  | 0.01   |
| DNMBP    | 6.199  | 20     |
| DNMT1    | 5.408  | 7.76   |
| DNMT3A   | 5.906  | 3.16   |
| DNMT3AP1 | 2.748  | 0      |
| DNMT3B   | 4.778  | 1.14   |
| DNMT3L   | 1.871  | 0.27   |
| DNPEP    | 1.672  | 15.15  |
| DNTT     | 2.61   | 115.31 |
| DNTTIP1  | 1.29   | 10.59  |
| DNTTIP2  | 2.38   | 15.47  |
| DOC2A    | 2.066  | 2.39   |
| DOC2B    | 2.026  | 0      |
| DOCK1    | 6.642  | 0.02   |
| DOCK10   | 4.274  | 2.76   |
| DOCK11   | 6.626  | 11.44  |
| DOCK2    | 6.05   | 10.69  |
| DOCK3    | 8.706  | 0.05   |
| DOCK4    | 16.672 | 0.05   |
| DOCK5    | 7.555  | 0.24   |
| DOCK6    | 6.356  | 0.04   |
| DOCK7    | 7.052  | 1.36   |
| DOCK8    | 7.233  | 6.22   |
| DOCK9    | 7.523  | 1.12   |
| DOHH     | 1.74   | 4.84   |
| DOK1     | 1.89   | 2.35   |
| DOK2     | 1.77   | 5.93   |
| DOK3     | 1.724  | 12.4   |

|            |       |       |
|------------|-------|-------|
| DOK4       | 2.689 | 3.64  |
| DOK5       | 1.833 | 0     |
| DOK6       | 1.96  | 0     |
| DOK7       | 2.549 | 0     |
| DOLK       | 2.204 | 0.94  |
| DOLPP1     | 2.153 | 0.69  |
| DOM3Z      | 4.77  | 0     |
| DONSON     | 2.17  | 4.19  |
| DOPEY1     | 7.899 | 2.7   |
| DOPEY2     | 7.679 | 0.59  |
| DOT1L      | 7.501 | 17.77 |
| DP58       | 3.728 | 0     |
| DPAGT1     | 2.937 | 1.69  |
| DPCR1      | 5.905 | 0     |
| DPEP1      | 2.14  | 53.03 |
| DPEP2      | 1.697 | 1.64  |
| DPEP3      | 1.652 | 0.06  |
| DPF1       | 1.424 | 0     |
| DPF2       | 2.409 | 14.66 |
| DPF3       | 4.119 | 0     |
| DPH1-OVCA2 | 3.228 | 18.3  |
| DPH2       | 2.497 | 2.45  |
| DPH3       | 0.532 | 2.42  |
| DPH4       | 3     | 0.33  |
| DPH5       | 1.3   | 14.15 |
| DPM1       | 1.047 | 16.91 |
| DPM2       | 0.91  | 4.13  |
| DPM3       | 0.831 | 7.5   |
| DPP10      | 4.581 | 0     |
| DPP3       | 2.692 | 4.37  |
| DPP4       | 3.9   | 0.59  |
| DPP6       | 9     | 0     |
| DPP7       | 2.121 | 47.86 |
| DPP8       | 4.568 | 3.56  |
| DPP9       | 4.258 | 7.44  |
| DPPA2      | 1.379 | 0     |
| DPPA3      | 1.04  | 0     |
| DPPA4      | 2.579 | 0     |
| DPPA5      | 0.612 | 0     |
| DPRX       | 0.648 | 0     |
| DPRXP1     | 0.614 | 0     |
| DPRXP2     | 1.003 | 0     |
| DPRXP3     | 0.639 | 0     |
| DPRXP4     | 0.67  | 1.33  |
| DPRXP5     | 0.895 | 0     |
| DPRXP6     | 0.659 | 0.15  |
| DPRXP7     | 0.654 | 0     |
| DPT        | 1.703 | 0     |
| DPY19L1    | 9.73  | 0.35  |
| DPY19L2    | 4.057 | 0     |

|           |        |       |
|-----------|--------|-------|
| DPY19L2P1 | 43.61  | 0.01  |
| DPY19L2P3 | 10.642 | 0     |
| DPY19L3   | 4.456  | 0.84  |
| DPY19L4   | 4.179  | 1.7   |
| DPYD      | 4.409  | 1.55  |
| DPYS      | 2.122  | 0     |
| DPYSL2    | 4.54   | 16.15 |
| DPYSL3    | 5.05   | 0     |
| DPYSL4    | 2.715  | 0.04  |
| DPYSL5    | 3.061  | 0     |
| DQX1      | 2.54   | 0     |
| DR1       | 4.097  | 14.51 |
| DRAM      | 3.058  | 6.66  |
| DRAP1     | 0.988  | 19.73 |
| DRB1      | 1.785  | 2.55  |
| DRD1      | 3.373  | 0     |
| DRD1IP    | 0.914  | 0     |
| DRD2      | 2.579  | 0     |
| DRD3      | 1.824  | 0     |
| DRD4      | 1.36   | 2.25  |
| DRD5      | 2.031  | 0     |
| DRD5P1    | 2.05   | 0     |
| DRD5P2    | 2.049  | 0     |
| DRG1      | 1.45   | 13.44 |
| DRG2      | 1.888  | 8.91  |
| DRP2      | 3.498  | 0     |
| DSC1      | 5.747  | 0.02  |
| DSC2      | 7.343  | 0.03  |
| DSC3      | 9.215  | 0     |
| DSCAM     | 8.388  | 0     |
| DSCAML1   | 6.899  | 0     |
| DSCR1     | 3.075  | 18.41 |
| DSCR10    | 0.86   | 0     |
| DSCR1L1   | 3.186  | 0     |
| DSCR1L2   | 1.7    | 0.46  |
| DSCR2     | 1.128  | 5.7   |
| DSCR3     | 3.251  | 3.4   |
| DSCR4     | 1.098  | 0     |
| DSCR6     | 2.235  | 0.71  |
| DSCR8     | 1.287  | 0     |
| DSCR9     | 1.644  | 0.06  |
| DSE       | 3.96   | 3.05  |
| DSEL      | 9.281  | 0.11  |
| DSG1      | 4.512  | 0     |
| DSG2      | 3.518  | 0     |
| DSG3      | 3.336  | 0     |
| DSG4      | 3.579  | 0     |
| DSN1      | 2.095  | 4.11  |
| DSP       | 10.228 | 0.02  |
| DSPP      | 4.331  | 0     |

|         |        |        |
|---------|--------|--------|
| DSS1P1  | 0.477  | 18.04  |
| DST     | 30.184 | 0.2    |
| DSTN    | 2.312  | 1.97   |
| DTD1    | 1.344  | 0.67   |
| DTL     | 4.199  | 1.88   |
| DTNA    | 8.632  | 0      |
| DTNB    | 2.474  | 1.2    |
| DTNBP1  | 3.75   | 7.63   |
| DTWD1   | 1.222  | 2.59   |
| DTWD2   | 2.307  | 0.04   |
| DTX1    | 3.288  | 2.62   |
| DTX2    | 5.538  | 0.37   |
| DTX3    | 2.029  | 1.51   |
| DTX3L   | 4.92   | 5.99   |
| DTX4    | 8.446  | 0.71   |
| DTYMK   | 1.053  | 3.76   |
| DUB3    | 1.593  | 0      |
| DUB4    | 1.197  | 0      |
| DULLARD | 1.528  | 47.26  |
| DUOX1   | 5.677  | 0.07   |
| DUOX2   | 6.346  | 0      |
| DUOXA1  | 1.88   | 0      |
| DUOXA2  | 1.725  | 0      |
| DUPD1   | 0.663  | 0      |
| DUS1L   | 2.222  | 34.87  |
| DUS2L   | 1.926  | 2.21   |
| DUS3L   | 2.056  | 8.18   |
| DUS4L   | 4.5    | 0.64   |
| DUSP1   | 2.016  | 100.85 |
| DUSP10  | 3.609  | 3.01   |
| DUSP11  | 1.575  | 12.57  |
| DUSP12  | 1.249  | 6.1    |
| DUSP13  | 3.403  | 0.03   |
| DUSP14  | 1.455  | 3.13   |
| DUSP15  | 1.905  | 4.83   |
| DUSP16  | 3.566  | 1.16   |
| DUSP18  | 2.453  | 1      |
| DUSP19  | 5.179  | 0.02   |
| DUSP2   | 1.682  | 35.18  |
| DUSP21  | 0.885  | 0      |
| DUSP22  | 1.822  | 6.74   |
| DUSP23  | 0.685  | 3.9    |
| DUSP26  | 1.649  | 22.08  |
| DUSP27  | 4.034  | 0      |
| DUSP28  | 1.555  | 4.2    |
| DUSP3   | 4.1    | 2.63   |
| DUSP4   | 5.15   | 0.02   |
| DUSP5   | 2.528  | 0.31   |
| DUSP5P  | 9.975  | 0.04   |
| DUSP6   | 2.82   | 9.79   |

|          |        |       |
|----------|--------|-------|
| DUSP7    | 1.239  | 4.71  |
| DUSP8    | 2.371  | 11.18 |
| DUSP9    | 2.285  | 0.09  |
| DUT      | 2.94   | 13.46 |
| DUX1     | 1.229  | 0     |
| DUX4     | 2.571  | 0     |
| DUX4C    | 1.125  | 0     |
| DUXA     | 3.346  | 0     |
| DUXAP1   | 0.535  | 0     |
| DUXAP10  | 3.087  | 0.06  |
| DUXAP2   | 1.009  | 0     |
| DUXAP3   | 3.458  | 0     |
| DUXAP4   | 1.613  | 0     |
| DUXAP5   | 1.318  | 0     |
| DUXAP6   | 1.06   | 0     |
| DUXAP7   | 1.33   | 0     |
| DUXAP8   | 3.087  | 0.32  |
| DUXAP9   | 3.086  | 0.16  |
| DVL1     | 3.462  | 5.8   |
| DVL2     | 3.016  | 7.31  |
| DVL3     | 5.062  | 13.02 |
| DYDC1    | 0.75   | 0     |
| DYDC2    | 1.842  | 0.05  |
| DYM      | 2.628  | 8.66  |
| DYNC1H1  | 14.224 | 13.58 |
| DYNC1I1  | 5.9    | 0.44  |
| DYNC1I2  | 2.602  | 5.48  |
| DYNC1LI1 | 2.477  | 10.9  |
| DYNC1LI2 | 6.326  | 25.31 |
| DYNC2H1  | 14.067 | 0.25  |
| DYNC2LI1 | 2.52   | 0.31  |
| DYNLL1   | 0.99   | 3.8   |
| DYNLL2   | 2.065  | 46.57 |
| DYNLRB1  | 0.685  | 27.88 |
| DYNLRB2  | 0.497  | 0     |
| DYNLT1   | 1.725  | 27.99 |
| DYNLT3   | 2.158  | 3.76  |
| DYRK1A   | 13.9   | 14.93 |
| DYRK1B   | 2.767  | 2.76  |
| DYRK2    | 6.267  | 9.63  |
| DYRK3    | 2.914  | 8.76  |
| DYRK4    | 1.845  | 2.95  |
| DYSF     | 6.883  | 0.95  |
| DYSFIP1  | 0.586  | 0     |
| DYTN     | 31.844 | 0.01  |
| DYX1C1   | 2.844  | 0.04  |
| DZIP1    | 7.47   | 0     |
| DZIP1L   | 3.493  | 0.03  |
| DZIP3    | 5.295  | 0.26  |
| E2F1     | 2.486  | 7.6   |

|          |        |        |
|----------|--------|--------|
| E2F2     | 5.192  | 4.94   |
| E2F3     | 4.745  | 7.21   |
| E2F4     | 2.1    | 18.23  |
| E2F5     | 1.728  | 0.52   |
| E2F6     | 2.396  | 0.7    |
| E2F7     | 5.726  | 0.33   |
| E2F8     | 3.721  | 0.69   |
| E4F1     | 2.573  | 6.58   |
| EAF1     | 4.838  | 22.25  |
| EAF2     | 1.02   | 3.2    |
| EARS2    | 3.841  | 1.34   |
| EBAG9    | 1.862  | 3.93   |
| EBF1     | 6.231  | 29.11  |
| EBF2     | 2.28   | 0      |
| EBF3     | 4.361  | 0.41   |
| EBI2     | 1.73   | 2.58   |
| EBI3     | 1.138  | 0.44   |
| EBNA1BP2 | 1.322  | 4.04   |
| EBP      | 1.064  | 14.78  |
| EBPL     | 0.914  | 11.47  |
| ECAT1    | 1.018  | 0      |
| ECAT8    | 3.931  | 0      |
| ECD      | 2.396  | 15.48  |
| ECE1     | 2.409  | 1.35   |
| ECE2     | 3.497  | 0.03   |
| ECEL1    | 2.858  | 15.68  |
| ECEL1P2  | 1.295  | 0      |
| ECEL1P3  | 0.238  | 0      |
| ECGF1    | 1.6    | 1.92   |
| ECH1     | 1.263  | 17.71  |
| ECHDC1   | 2.257  | 3.02   |
| ECHDC2   | 1.126  | 9.05   |
| ECHDC3   | 1.627  | 1.88   |
| ECHS1    | 1.516  | 16.71  |
| ECM1     | 1.819  | 245.19 |
| ECM2     | 3.163  | 1.16   |
| ECOP     | 5.78   | 2.11   |
| ECSIT    | 1.628  | 10.39  |
| ECSM2    | 0.246  | 0      |
| ECT2     | 3.916  | 0.53   |
| EDA      | 8.202  | 0.12   |
| EDA2R    | 3.372  | 0.03   |
| EDAR     | 4.212  | 0      |
| EDARADD  | 3.017  | 5.8    |
| EDC3     | 3.739  | 1.72   |
| EDC4     | 4.727  | 20.98  |
| EDD1     | 9.394  | 19.77  |
| EDEM1    | 10.314 | 77.23  |
| EDEM2    | 1.885  | 5.93   |
| EDEM3    | 6.283  | 1.35   |

|          |       |         |
|----------|-------|---------|
| EDF1     | 1.146 | 78.82   |
| EDG1     | 2.898 | 24.38   |
| EDG2     | 3.168 | 0       |
| EDG3     | 4.206 | 0       |
| EDG4     | 1.823 | 14.43   |
| EDG5     | 1.154 | 0.17    |
| EDG6     | 2.5   | 93.12   |
| EDG7     | 1.137 | 0       |
| EDG8     | 2.122 | 1.68    |
| EDIL3    | 2.974 | 0       |
| EDN1     | 1.328 | 0.15    |
| EDN2     | 1.196 | 0       |
| EDN3     | 5.807 | 0       |
| EDNRA    | 4.093 | 0       |
| EDNRB    | 4.658 | 0.02    |
| EEA1     | 4.866 | 0.43    |
| EED      | 2.819 | 4.59    |
| EEF1A1   | 4.019 | 354.68  |
| EEF1A2   | 1.843 | 0       |
| EEF1AL11 | 1.748 | 5.95    |
| EEF1B1   | 0.795 | 2.36    |
| EEF1B2   | 1.289 | 189.2   |
| EEF1B3   | 0.861 | 11.6    |
| EEF1D    | 2.603 | 168.15  |
| EEF1E1   | 1.036 | 2.19    |
| EEF1G    | 3.094 | 42.11   |
| EEF2     | 3.158 | 1413.81 |
| EEF2K    | 7.412 | 3       |
| EEFSEC   | 2.216 | 2.14    |
| EFCAB1   | 2.051 | 0       |
| EFCAB2   | 0.994 | 1.8     |
| EFCAB3   | 1.542 | 0.06    |
| EFCAB4A  | 1.752 | 3.72    |
| EFCAB4B  | 2.719 | 7.42    |
| EFCAB5   | 6.163 | 0.04    |
| EFCBP1   | 5.224 | 0       |
| EFCBP2   | 1.606 | 0       |
| EFEMP1   | 3.046 | 0.36    |
| EFEMP2   | 1.939 | 8.83    |
| EFHA1    | 1.876 | 5.32    |
| EFHA2    | 3.985 | 0       |
| EFHB     | 2.823 | 0       |
| EFHC1    | 2.099 | 6.51    |
| EFHC2    | 2.464 | 0.24    |
| EFHD1    | 1.868 | 0.05    |
| EFHD2    | 2.365 | 25.02   |
| EFNA1    | 1.809 | 21.99   |
| EFNA2    | 0.642 | 0       |
| EFNA3    | 1.782 | 0.55    |
| EFNA4    | 1.967 | 0.1     |

|         |        |        |
|---------|--------|--------|
| EFNA5   | 1.574  | 0      |
| EFNB1   | 3.336  | 6.08   |
| EFNB2   | 4.322  | 3.25   |
| EFNB3   | 3.219  | 0.19   |
| EFS     | 3.118  | 0      |
| EFTUD1  | 3.562  | 0.28   |
| EFTUD2  | 3.717  | 13.15  |
| EGF     | 4.874  | 0      |
| EGFL11  | 2.23   | 0      |
| EGFL6   | 2.382  | 0      |
| EGFL7   | 2.039  | 38.58  |
| EGFL8   | 3.807  | 0.1    |
| EGFL9   | 1.61   | 0.12   |
| EGFLAM  | 8.135  | 0      |
| EGFR    | 13.29  | 0      |
| EGLN1   | 6.806  | 13.69  |
| EGLN2   | 7.135  | 6.12   |
| EGLN3   | 2.724  | 0      |
| EGR1    | 3.136  | 4.17   |
| EGR2    | 2.979  | 0.2    |
| EGR3    | 4.334  | 0.36   |
| EGR4    | 2.149  | 0      |
| EHBP1   | 5.032  | 0.92   |
| EHBP1L1 | 5.513  | 19.88  |
| EHD1    | 3.457  | 9.99   |
| EHD2    | 3.495  | 0.03   |
| EHD3    | 3.583  | 4.06   |
| EHD4    | 2.881  | 1.72   |
| EHF     | 3.617  | 0      |
| EHHADH  | 3.801  | 0.05   |
| EHMT1   | 6.696  | 18.42  |
| EHMT2   | 11.904 | 0      |
| EI24    | 3.421  | 8.33   |
| EID1    | 2.091  | 24.13  |
| EID2    | 1.393  | 2.2    |
| EID2B   | 1.865  | 1.06   |
| EID3    | 1.435  | 1.58   |
| EIF1    | 1.468  | 669.51 |
| EIF1AP1 | 1.673  | 10.41  |
| EIF1AX  | 4.431  | 6.25   |
| EIF1AY  | 1.39   | 12.24  |
| EIF1B   | 1.012  | 81.54  |
| EIF2A   | 3.879  | 20.58  |
| EIF2AK1 | 5.594  | 10.88  |
| EIF2AK2 | 2.808  | 2.89   |
| EIF2AK3 | 5.251  | 55.13  |
| EIF2AK4 | 5.512  | 23.19  |
| EIF2B1  | 1.794  | 18.69  |
| EIF2B2  | 1.539  | 5.65   |
| EIF2B3  | 1.659  | 1.61   |



|            |       |        |
|------------|-------|--------|
| EIF2B4     | 2.144 | 7.52   |
| EIF2B5     | 2.898 | 9.01   |
| EIF2C1     | 7.478 | 1.76   |
| EIF2C2     | 7.328 | 33.21  |
| EIF2C3     | 3.966 | 0.95   |
| EIF2C4     | 5.736 | 8.88   |
| EIF2S1     | 4.165 | 3.35   |
| EIF2S2     | 2.592 | 8.7    |
| EIF2S2P    | 1.545 | 0.57   |
| EIF2S2P2   | 1.375 | 0.14   |
| EIF2S3     | 3.465 | 49.28  |
| EIF3S1     | 2.558 | 11.72  |
| EIF3S10    | 5.305 | 37.86  |
| EIF3S12    | 0.879 | 160.96 |
| EIF3S2     | 1.458 | 45.88  |
| EIF3S3     | 1.275 | 222.47 |
| EIF3S4     | 2.07  | 93.68  |
| EIF3S5     | 1.256 | 270.51 |
| EIF3S5P    | 1.04  | 2.95   |
| EIF3S6     | 1.796 | 136.73 |
| EIF3S6IP   | 1.949 | 292.75 |
| EIF3S6IPP  | 1.834 | 20.12  |
| EIF3S6IPP2 | 0.984 | 38.01  |
| EIF3S6P1   | 1.468 | 39.49  |
| EIF3S7     | 2.137 | 134.81 |
| EIF3S8     | 3.154 | 60.79  |
| EIF3S9     | 8.838 | 14.27  |
| EIF4A1     | 2.602 | 47.75  |
| EIF4A1P    | 0.941 | 0      |
| EIF4A2     | 3.246 | 98.82  |
| EIF4A3     | 1.686 | 9.04   |
| EIF4B      | 4.476 | 69.67  |
| EIF4BP     | 0.344 | 0      |
| EIF4E      | 2.474 | 5.87   |
| EIF4E1B    | 0.654 | 0      |
| EIF4E2     | 1.009 | 12.75  |
| EIF4E2P1   | 0.591 | 0      |
| EIF4E3     | 2.764 | 0.76   |
| EIF4EBP1   | 0.844 | 8.09   |
| EIF4EBP1P  | 0.808 | 0.37   |
| EIF4EBP2   | 3.196 | 16.19  |
| EIF4EBP3   | 0.691 | 7.87   |
| EIF4ENIF1  | 3.521 | 3.17   |
| EIF4EP1    | 0.639 | 2.17   |
| EIF4G1     | 6.388 | 17.69  |
| EIF4G2     | 4.886 | 57.63  |
| EIF4G3     | 5.793 | 9.05   |
| EIF4H      | 6.114 | 73.08  |
| EIF5       | 6.436 | 24.75  |
| EIF5A      | 1.234 | 38.56  |

|         |       |       |
|---------|-------|-------|
| EIF5A2  | 5.537 | 0.04  |
| EIF5AP1 | 0.543 | 0.91  |
| EIF5AP2 | 0.559 | 0     |
| EIF5AP3 | 0.558 | 0.53  |
| EIF5B   | 4.698 | 9.88  |
| ELA1    | 0.952 | 0     |
| ELA2    | 0.924 | 9.31  |
| ELA2A   | 0.916 | 0     |
| ELA2B   | 0.923 | 0     |
| ELA3A   | 0.907 | 0     |
| ELA3B   | 1.003 | 0     |
| ELAC1   | 2.233 | 0.4   |
| ELAC2   | 2.968 | 7.43  |
| ELAVL1  | 6.058 | 4.36  |
| ELAVL2  | 2.177 | 0     |
| ELAVL3  | 5.013 | 0     |
| ELAVL4  | 1.578 | 0     |
| ELF1    | 4.508 | 98.15 |
| ELF2    | 4.018 | 18.39 |
| ELF3    | 4.99  | 0.06  |
| ELF4    | 4.166 | 11.42 |
| ELF5    | 2.683 | 0     |
| ELK1    | 2.828 | 7.14  |
| ELK2P1  | 3.717 | 0.05  |
| ELK2P2  | 6.869 | 0.03  |
| ELK3    | 3.155 | 24.96 |
| ELK4    | 5.347 | 6.2   |
| ELL     | 4.008 | 8.29  |
| ELL2    | 4.525 | 11.8  |
| ELL3    | 2.113 | 0.19  |
| ELMO1   | 8.379 | 4.41  |
| ELMO2   | 3.704 | 10.26 |
| ELMO3   | 2.512 | 0.79  |
| ELMOD1  | 2.734 | 0     |
| ELMOD2  | 1.292 | 2.29  |
| ELN     | 4.548 | 0.06  |
| ELOF1   | 1.019 | 9.9   |
| ELOVL1  | 1.483 | 18.82 |
| ELOVL2  | 4.027 | 0.91  |
| ELOVL3  | 1.313 | 0     |
| ELOVL4  | 2.967 | 0.07  |
| ELOVL5  | 3.899 | 26.67 |
| ELOVL6  | 3.029 | 0.13  |
| ELOVL7  | 3.815 | 0     |
| ELP3    | 3.074 | 1.71  |
| ELP4    | 1.567 | 1.14  |
| ELSPBP1 | 1.031 | 0     |
| ELTD1   | 2.55  | 0     |
| EMB     | 2.074 | 8.01  |
| EMCN    | 1.483 | 0.07  |

|         |        |        |
|---------|--------|--------|
| EMD     | 1.558  | 26.74  |
| EME1    | 2.304  | 0.52   |
| EME2    | 1.335  | 3.26   |
| EMG1    | 0.996  | 8.94   |
| EMID1   | 2.06   | 22.14  |
| EMID2   | 3.901  | 4.19   |
| EMILIN1 | 3.431  | 1.35   |
| EMILIN2 | 4.009  | 3.04   |
| EMILIN3 | 3.827  | 0.2    |
| EML1    | 4.522  | 0      |
| EML2    | 2.248  | 2.6    |
| EML3    | 3.165  | 18.28  |
| EML4    | 5.523  | 10.25  |
| EML5    | 7.081  | 0      |
| EMP1    | 2.749  | 20.41  |
| EMP2    | 2.266  | 6.68   |
| EMP3    | 0.816  | 141.5  |
| EMR1    | 3.123  | 0.12   |
| EMR2    | 6.962  | 3.35   |
| EMR3    | 2.951  | 0.03   |
| EMR4    | 2.052  | 0      |
| EMX1    | 3.12   | 0      |
| EMX2    | 2.892  | 0      |
| EMX2OS  | 7.28   | 0      |
| EN1     | 2.943  | 0      |
| EN2     | 9.562  | 0      |
| ENAH    | 13.172 | 0.55   |
| ENAM    | 5.674  | 0.04   |
| ENC1    | 4.785  | 0.66   |
| ENDOD1  | 4.693  | 3.31   |
| ENDOG   | 1.145  | 1.72   |
| ENDOGL1 | 1.459  | 2.78   |
| ENG     | 4.475  | 95.64  |
| ENO1    | 2.05   | 135.61 |
| ENO1P   | 1.825  | 13.71  |
| ENO2    | 2.423  | 2.12   |
| ENO3    | 1.558  | 3.74   |
| ENOPH1  | 1.973  | 3.26   |
| ENOSF1  | 1.778  | 3.67   |
| ENPEP   | 3.829  | 0      |
| ENPP1   | 3.493  | 0      |
| ENPP2   | 3.276  | 14.17  |
| ENPP3   | 2.787  | 0      |
| ENPP4   | 4.311  | 0.32   |
| ENPP5   | 2.943  | 0.07   |
| ENPP6   | 3.841  | 0      |
| ENPP7   | 1.842  | 0      |
| ENSA    | 4.438  | 22.54  |
| ENSAP   | 0.341  | 0      |
| ENSAP2  | 0.474  | 26.92  |

|          |        |       |
|----------|--------|-------|
| ENTHD1   | 2.71   | 0     |
| ENTPD1   | 1.94   | 3.06  |
| ENTPD2   | 2.166  | 0.09  |
| ENTPD3   | 2.776  | 0.04  |
| ENTPD4   | 10.151 | 49.61 |
| ENTPD5   | 1.992  | 0.35  |
| ENTPD6   | 2.729  | 10.26 |
| ENTPD7   | 3.017  | 0.04  |
| ENTPD8   | 2.111  | 0     |
| ENY2     | 0.783  | 33.48 |
| EOMES    | 2.754  | 0.51  |
| EP300    | 8.765  | 20.11 |
| EP400    | 12.265 | 4.8   |
| EP400NL  | 2.741  | 0.97  |
| EPAS1    | 5.138  | 39.07 |
| EPB41    | 7.515  | 5.35  |
| EPB41L1  | 6.496  | 0.15  |
| EPB41L2  | 4.291  | 5.65  |
| EPB41L3  | 4.446  | 0.16  |
| EPB41L4A | 4.707  | 5.02  |
| EPB41L4B | 7.651  | 0.45  |
| EPB41L5  | 6.54   | 0.03  |
| EPB42    | 2.696  | 0.29  |
| EPB49    | 2.725  | 1.88  |
| EPC1     | 4.167  | 20.98 |
| EPC2     | 3.633  | 3.79  |
| EPDR1    | 5.198  | 0.08  |
| EPF5     | 0.421  | 0     |
| EPGN     | 0.847  | 0     |
| EPHA1    | 6.726  | 0.02  |
| EPHA10   | 4.278  | 0     |
| EPHA2    | 3.946  | 0.03  |
| EPHA3    | 6.924  | 0     |
| EPHA4    | 6.348  | 1.22  |
| EPHA5    | 3.349  | 0     |
| EPHA6    | 3.949  | 0     |
| EPHA7    | 5.215  | 0     |
| EPHA8    | 5.747  | 0     |
| EPHB1    | 4.516  | 0     |
| EPHB2    | 6.573  | 0     |
| EPHB3    | 4.22   | 0.84  |
| EPHB4    | 8.987  | 4.86  |
| EPHB6    | 8.086  | 0.66  |
| EPHX1    | 2.315  | 10.51 |
| EPHX2    | 2.196  | 0     |
| EPM2A    | 4.092  | 0.94  |
| EPM2AIP1 | 5.567  | 8.64  |
| EPN1     | 2.375  | 32.99 |
| EPN2     | 4.814  | 0.04  |
| EPN3     | 2.93   | 0.1   |

|         |        |       |
|---------|--------|-------|
| EPO     | 2.66   | 0.15  |
| EPOR    | 1.848  | 0.11  |
| EPPB9   | 0.915  | 0.32  |
| EPPK1   | 7.216  | 0.04  |
| EPR1    | 1.286  | 2.08  |
| EPRS    | 5.015  | 7.02  |
| EPS15   | 5.567  | 13.19 |
| EPS15L1 | 2.774  | 5.28  |
| EPS8    | 3.906  | 4.38  |
| EPS8L1  | 3.411  | 0.14  |
| EPS8L2  | 3.141  | 0.06  |
| EPS8L3  | 2.49   | 0     |
| EPST11  | 2.09   | 2.08  |
| EPX     | 2.267  | 0.87  |
| EPYC    | 1.535  | 0     |
| ERAF    | 0.506  | 1.37  |
| ERAL1   | 1.825  | 8.46  |
| ERAS    | 1.266  | 0     |
| ERBB2   | 5.279  | 4.74  |
| ERBB2IP | 6.916  | 11.12 |
| ERBB3   | 6.134  | 0.1   |
| ERBB4   | 5.485  | 0     |
| ERC1    | 10.659 | 1.19  |
| ERC2    | 6.138  | 0     |
| ERCC1   | 1.583  | 15.44 |
| ERCC2   | 2.355  | 3.74  |
| ERCC3   | 2.75   | 13.39 |
| ERCC4   | 2.751  | 1.11  |
| ERCC5   | 4.096  | 12.97 |
| ERCC6   | 4.713  | 1.16  |
| ERCC8   | 2.843  | 1.32  |
| EREG    | 4.628  | 0.41  |
| ERF     | 2.665  | 32.22 |
| ERG     | 11.837 | 31.79 |
| ERGIC1  | 6.673  | 17.08 |
| ERGIC2  | 1.777  | 2.51  |
| ERGIC3  | 1.856  | 81.56 |
| ERH     | 1.786  | 20.39 |
| ERICH1  | 2.435  | 15.12 |
| ERLIN1  | 3.104  | 8.76  |
| ERLIN2  | 6.073  | 3.34  |
| ERMAP   | 3.616  | 1.62  |
| ERN1    | 4.887  | 1.98  |
| ERN2    | 3.549  | 0     |
| ERO1L   | 3.31   | 2.09  |
| ERO1LB  | 3.689  | 12.44 |
| ERP28P  | 0.788  | 6.15  |
| ERP29   | 2.805  | 85.14 |
| ERRF11  | 3.077  | 0.06  |
| ERV3    | 3.558  | 7.2   |

|        |        |        |
|--------|--------|--------|
| ERVWE1 | 6.088  | 0.02   |
| ESAM   | 1.811  | 0.21   |
| ESCO1  | 4.435  | 2.07   |
| ESCO2  | 3.359  | 0.27   |
| ESD    | 1.192  | 30.46  |
| ESF1   | 3.216  | 1.97   |
| ESM1   | 1.637  | 0.06   |
| ESPL1  | 6.532  | 0.53   |
| ESPN   | 3.516  | 0      |
| ESPNL  | 4.607  | 0.02   |
| ESR1   | 6.455  | 0.03   |
| ESR2   | 3.404  | 0.18   |
| ESRRA  | 2.221  | 3.25   |
| ESRRB  | 2.193  | 0.04   |
| ESRRG  | 5.99   | 0      |
| ESSPL  | 1.011  | 0      |
| ESTRRA | 2.876  | 0.07   |
| ESX1   | 1.469  | 0      |
| ETAA1  | 3.283  | 4.25   |
| ETF1   | 4.027  | 25.53  |
| ETF1P1 | 6.495  | 0.08   |
| ETF1P2 | 5.068  | 0.8    |
| ETFA   | 1.402  | 7.69   |
| ETFB   | 1.609  | 22.57  |
| ETFDH  | 2.109  | 3.56   |
| ETHE1  | 0.963  | 13.77  |
| ETNK1  | 7.306  | 1.99   |
| ETNK2  | 2.43   | 0.33   |
| ETS1   | 5.194  | 17.6   |
| ETS2   | 7.575  | 157.35 |
| ETV1   | 12.313 | 0      |
| ETV2   | 1.559  | 0.19   |
| ETV3   | 1.411  | 6.24   |
| ETV4   | 2.852  | 3.08   |
| ETV5   | 4.074  | 8.82   |
| ETV6   | 8.411  | 16.42  |
| ETV7   | 1.626  | 0.49   |
| EVA1   | 2.955  | 0.07   |
| EVC    | 6.43   | 0.36   |
| EVC2   | 4.406  | 0.5    |
| EVI1   | 3.572  | 0.03   |
| EVI2A  | 2.434  | 10.65  |
| EVI2B  | 1.954  | 47.39  |
| EVI5   | 7.403  | 0.44   |
| EVI5L  | 3.731  | 1.88   |
| EVL    | 1.842  | 30.08  |
| EVPL   | 6.457  | 0.08   |
| EVX1   | 3.716  | 0      |
| EVX2   | 1.617  | 0.06   |
| EWSR1  | 6.466  | 77.46  |

|         |       |       |
|---------|-------|-------|
| EXDL1   | 2.939 | 0     |
| EXDL2   | 2.831 | 1.19  |
| EXO1    | 3.507 | 0.56  |
| EXOC1   | 3.73  | 4.88  |
| EXOC2   | 4.442 | 1.45  |
| EXOC3   | 2.764 | 10.35 |
| EXOC3L  | 6.034 | 3.84  |
| EXOC3L2 | 1.719 | 0.23  |
| EXOC4   | 8.703 | 4.68  |
| EXOC5   | 8.511 | 1.01  |
| EXOC6   | 3.715 | 0.93  |
| EXOC6B  | 6.018 | 0.44  |
| EXOC7   | 4.78  | 8.59  |
| EXOC8   | 5.099 | 5.55  |
| EXOD1   | 1.479 | 0     |
| EXOSC1  | 1.15  | 6.88  |
| EXOSC10 | 2.808 | 18.32 |
| EXOSC2  | 1.979 | 4.05  |
| EXOSC3  | 1.816 | 2.29  |
| EXOSC4  | 0.895 | 4.53  |
| EXOSC5  | 1.7   | 10.94 |
| EXOSC6  | 1.7   | 13.5  |
| EXOSC7  | 1.013 | 4.88  |
| EXOSC8  | 0.959 | 4.03  |
| EXOSC9  | 1.644 | 8.85  |
| EXPH5   | 6.655 | 0.03  |
| EXT1    | 3.363 | 0.18  |
| EXT2    | 3.787 | 4.96  |
| EXTL1   | 3.992 | 0     |
| EXTL2   | 2.958 | 0.4   |
| EXTL3   | 6.172 | 0.72  |
| EYA1    | 4.793 | 0     |
| EYA2    | 3.411 | 0.03  |
| EYA3    | 2.045 | 2.18  |
| EYA4    | 3.401 | 0     |
| EZH1    | 4.623 | 10.93 |
| EZH2    | 5.91  | 5.14  |
| F10     | 1.536 | 0     |
| F11     | 2.217 | 0     |
| F11R    | 4.762 | 17.39 |
| F12     | 2.049 | 0.04  |
| F13A1   | 3.834 | 20.74 |
| F13B    | 2.186 | 0     |
| F2      | 1.997 | 0     |
| F25965  | 0.9   | 0.88  |
| F2R     | 3.595 | 7.43  |
| F2RL1   | 2.862 | 0.14  |
| F2RL2   | 3.41  | 0.49  |
| F2RL3   | 2.731 | 0.98  |
| F3      | 3.26  | 15.85 |

|           |        |        |
|-----------|--------|--------|
| F5        | 6.914  | 0.07   |
| F7        | 2.7    | 1.14   |
| F8        | 11.005 | 0.04   |
| F8A1      | 1.702  | 1.1    |
| F8A2      | 1.116  | 0      |
| F8A3      | 1.116  | 0      |
| F9        | 2.802  | 0      |
| FA2H      | 2.419  | 0      |
| FAAH      | 2.043  | 1.31   |
| FAAH2     | 1.98   | 0.25   |
| FABP1     | 0.489  | 0      |
| FABP2     | 2.251  | 0.04   |
| FABP3     | 1.097  | 0      |
| FABP3P2   | 0.444  | 0      |
| FABP4     | 0.62   | 0      |
| FABP5     | 0.66   | 1.2    |
| FABP5L3   | 14.901 | 4.74   |
| FABP5P1   | 0.664  | 0      |
| FABP6     | 0.858  | 0      |
| FABP7     | 1      | 0      |
| FADD      | 1.841  | 5.22   |
| FADS1     | 4.195  | 1.11   |
| FADS2     | 3.149  | 4.84   |
| FADS3     | 1.779  | 31.81  |
| FADS6     | 2.052  | 0      |
| FAF1      | 2.608  | 10.32  |
| FAH       | 1.447  | 0.82   |
| FAHD1     | 3.35   | 1.27   |
| FAHD2A    | 1.298  | 5.56   |
| FAHD2B    | 1.265  | 0.62   |
| FAIM      | 1.794  | 1.22   |
| FAIM2     | 4.703  | 0      |
| FAIM3     | 1.95   | 9.69   |
| FAM100A   | 2.69   | 16.44  |
| FAM100B   | 3.603  | 107.72 |
| FAM101A   | 2.148  | 0      |
| FAM101B   | 0.871  | 7.39   |
| FAM102A   | 4.183  | 2.27   |
| FAM102B   | 5.212  | 1.64   |
| FAM103A1  | 1.146  | 4.23   |
| FAM103A2P | 1.4    | 13.78  |
| FAM104A   | 2.697  | 10.05  |
| FAM104B   | 1.048  | 0.95   |
| FAM105A   | 1.925  | 0.26   |
| FAM105B   | 3.999  | 9.35   |
| FAM106A   | 2.281  | 0      |
| FAM107A   | 3.464  | 0.6    |
| FAM107B   | 5.182  | 39.08  |
| FAM108A1  | 2.025  | 4.49   |
| FAM108A2  | 1.512  | 0.33   |



|           |       |        |
|-----------|-------|--------|
| FAM109A   | 3.041 | 3.68   |
| FAM109B   | 2.332 | 3.95   |
| FAM10A3   | 2.597 | 0.15   |
| FAM10A4   | 1.599 | 0.19   |
| FAM10A5   | 1.632 | 0.67   |
| FAM10A6   | 1.662 | 0.48   |
| FAM10A7   | 5.195 | 0.02   |
| FAM110C   | 1.521 | 0.06   |
| FAM111A   | 3.632 | 11.69  |
| FAM111B   | 3.488 | 2.01   |
| FAM112A   | 1.214 | 0      |
| FAM112B   | 0.769 | 7.33   |
| FAM113A   | 1.999 | 29.1   |
| FAM113B   | 2.075 | 0.81   |
| FAM114A1  | 2.118 | 0.23   |
| FAM116A   | 4.643 | 9.44   |
| FAM116B   | 1.763 | 6.51   |
| FAM117A   | 2.361 | 7.96   |
| FAM118A   | 1.69  | 1.64   |
| FAM118B   | 1.645 | 0.84   |
| FAM119A   | 1.773 | 1.9    |
| FAM119B   | 5.127 | 0.85   |
| FAM120A   | 4.957 | 8.22   |
| FAM120AOS | 3.037 | 5.86   |
| FAM120B   | 4.163 | 6.49   |
| FAM120C   | 4.232 | 0.75   |
| FAM122A   | 3.646 | 5.75   |
| FAM122B   | 3.747 | 6.55   |
| FAM122C   | 1.339 | 1.4    |
| FAM123A   | 4.857 | 0      |
| FAM123B   | 3.687 | 0.92   |
| FAM124A   | 2.104 | 0      |
| FAM124B   | 2.594 | 0.68   |
| FAM125A   | 1.193 | 8.21   |
| FAM125B   | 6.877 | 0.95   |
| FAM126A   | 7.498 | 0.23   |
| FAM126B   | 3.987 | 1.86   |
| FAM127A   | 1.18  | 3.52   |
| FAM127B   | 0.345 | 8.89   |
| FAM127C   | 2.017 | 0.15   |
| FAM128B   | 0.731 | 158.49 |
| FAM129A   | 6.926 | 3.35   |
| FAM129B   | 4.017 | 2.52   |
| FAM129C   | 2.749 | 20.55  |
| FAM12A    | 0.879 | 0      |
| FAM12B    | 0.896 | 0      |
| FAM130A1  | 4.469 | 1.93   |
| FAM130A2  | 2.938 | 0      |
| FAM13A1   | 6.134 | 3.31   |
| FAM13A1OS | 3.21  | 2.87   |

|         |        |       |
|---------|--------|-------|
| FAM13C1 | 4.799  | 0     |
| FAM14A  | 0.467  | 5.93  |
| FAM14B  | 0.882  | 4.04  |
| FAM18B  | 1.779  | 2.28  |
| FAM18B2 | 1.513  | 0.85  |
| FAM19A1 | 1.915  | 0.93  |
| FAM19A2 | 4.056  | 0.04  |
| FAM19A3 | 1.866  | 0     |
| FAM19A4 | 2.481  | 0     |
| FAM19A5 | 1.849  | 0     |
| FAM20A  | 2.267  | 0.09  |
| FAM20B  | 5.942  | 2.57  |
| FAM20C  | 3.557  | 0.25  |
| FAM21B  | 4.326  | 1.44  |
| FAM21C  | 4.62   | 2.48  |
| FAM22A  | 4.871  | 0.06  |
| FAM22F  | 2.756  | 0.07  |
| FAM22G  | 3.614  | 0.3   |
| FAM24A  | 0.596  | 0     |
| FAM24B  | 0.693  | 0.71  |
| FAM26A  | 1.636  | 0     |
| FAM26B  | 1.859  | 3.83  |
| FAM26C  | 3.053  | 0     |
| FAM27E1 | 1.341  | 0     |
| FAM27E2 | 1.338  | 0     |
| FAM27L  | 0.609  | 0     |
| FAM29A  | 6.321  | 2.04  |
| FAM32A  | 1.449  | 32.91 |
| FAM33A  | 2.693  | 1.73  |
| FAM35A  | 3.402  | 1.31  |
| FAM36A  | 3.318  | 10.02 |
| FAM38A  | 6.371  | 24.49 |
| FAM38B  | 2.325  | 0     |
| FAM39B  | 1.712  | 2.84  |
| FAM39CP | 5.493  | 0.52  |
| FAM39DP | 2.544  | 2.69  |
| FAM3A   | 1.606  | 10.17 |
| FAM3B   | 1.384  | 0     |
| FAM3C   | 6.602  | 13.76 |
| FAM3D   | 1.308  | 0     |
| FAM40A  | 3.262  | 5.91  |
| FAM40B  | 10.171 | 0.52  |
| FAM43A  | 3.145  | 18.84 |
| FAM43B  | 2.569  | 0     |
| FAM44A  | 10.542 | 7.37  |
| FAM44B  | 1.532  | 5.23  |
| FAM44C  | 3.359  | 0.03  |
| FAM45A  | 2.182  | 1.59  |
| FAM45B  | 1.818  | 0.92  |
| FAM46A  | 1.681  | 0.12  |

|         |        |        |
|---------|--------|--------|
| FAM46B  | 2.368  | 0.08   |
| FAM46C  | 5.695  | 1.04   |
| FAM46D  | 3.011  | 0      |
| FAM47A  | 2.519  | 0      |
| FAM47B  | 2.104  | 0      |
| FAM47C  | 3.27   | 0      |
| FAM48A  | 3.356  | 2.86   |
| FAM48B1 | 2.661  | 0      |
| FAM49A  | 4.208  | 29.79  |
| FAM49B  | 2.196  | 11.18  |
| FAM50A  | 1.311  | 9.73   |
| FAM50B  | 1.618  | 1.4    |
| FAM53A  | 1.896  | 0.2    |
| FAM53B  | 5.907  | 138.38 |
| FAM53C  | 4.13   | 39.72  |
| FAM54A  | 1.505  | 0.39   |
| FAM54B  | 2.099  | 5      |
| FAM55A  | 1.888  | 0      |
| FAM55B  | 2.218  | 0      |
| FAM55C  | 3.934  | 1      |
| FAM55D  | 1.687  | 0      |
| FAM57A  | 2.08   | 0      |
| FAM57B  | 1.637  | 0.12   |
| FAM58A  | 1.237  | 9.92   |
| FAM58B  | 0.645  | 0.31   |
| FAM59A  | 3.055  | 0      |
| FAM59B  | 4.503  | 0.11   |
| FAM5B   | 3.558  | 0      |
| FAM5C   | 2.884  | 0      |
| FAM60A  | 3.068  | 9.58   |
| FAM62A  | 4.174  | 11.33  |
| FAM62B  | 14.159 | 15.45  |
| FAM62C  | 4.051  | 0      |
| FAM63A  | 5.486  | 0.83   |
| FAM63B  | 5.139  | 1.06   |
| FAM64A  | 1.483  | 0.13   |
| FAM65A  | 4.07   | 30.97  |
| FAM66C  | 0.914  | 0      |
| FAM69A  | 0.64   | 5.72   |
| FAM69B  | 5.087  | 29.35  |
| FAM70A  | 3.394  | 0.06   |
| FAM70B  | 1.031  | 0      |
| FAM71A  | 2.302  | 0      |
| FAM71B  | 2.032  | 0      |
| FAM71C  | 1.799  | 0      |
| FAM72A  | 2.393  | 0      |
| FAM73A  | 5.274  | 1.3    |
| FAM73B  | 3.587  | 5.6    |
| FAM74A1 | 1.652  | 0      |
| FAM74A4 | 1.722  | 0      |

|           |       |       |
|-----------|-------|-------|
| FAM76A    | 2.049 | 3.52  |
| FAM76B    | 3.825 | 8.23  |
| FAM77C    | 2.493 | 0     |
| FAM77D    | 1.988 | 0     |
| FAM78A    | 3.936 | 1.16  |
| FAM78B    | 1.598 | 0     |
| FAM79A    | 2.428 | 3.71  |
| FAM79B    | 3.656 | 0     |
| FAM7A2    | 1.017 | 0.78  |
| FAM7A3    | 0.587 | 0.17  |
| FAM80A    | 1.51  | 0     |
| FAM80B    | 3.66  | 23.76 |
| FAM81A    | 2.906 | 0     |
| FAM81B    | 1.56  | 0     |
| FAM82A    | 1.985 | 0     |
| FAM82B    | 1.216 | 4.56  |
| FAM82C    | 2.251 | 7.82  |
| FAM83A    | 3.856 | 0     |
| FAM83B    | 3.167 | 0     |
| FAM83C    | 3.166 | 0     |
| FAM83D    | 2.425 | 1.06  |
| FAM83E    | 1.926 | 0     |
| FAM83F    | 1.925 | 0     |
| FAM83G    | 4.582 | 0.04  |
| FAM83H    | 5.597 | 0.02  |
| FAM84A    | 2.586 | 0.08  |
| FAM84B    | 5.232 | 0.32  |
| FAM86A    | 1.432 | 0     |
| FAM86B1   | 2.041 | 0     |
| FAM86C    | 3.688 | 0.03  |
| FAM86D    | 2.854 | 0.11  |
| FAM89A    | 1.27  | 0     |
| FAM89B    | 1.412 | 4.83  |
| FAM8A1    | 4.677 | 10.68 |
| FAM8A6P   | 4.613 | 0.04  |
| FAM8A7P   | 1.342 | 0     |
| FAM8A8P   | 1.677 | 0     |
| FAM8A9P   | 1.949 | 0     |
| FAM90A1   | 2.342 | 0     |
| FAM90A10  | 1.954 | 0     |
| FAM90A11P | 1.952 | 0     |
| FAM90A12  | 1.954 | 0     |
| FAM90A2P  | 1.954 | 0     |
| FAM90A3   | 1.954 | 0     |
| FAM90A5   | 1.954 | 0     |
| FAM90A6P  | 5.518 | 0     |
| FAM90A7   | 1.954 | 0     |
| FAM90A8   | 1.954 | 0     |
| FAM90A9   | 1.954 | 0     |
| FAM91A1   | 5.617 | 13.23 |

|         |        |       |
|---------|--------|-------|
| FAM91A2 | 0.779  | 0.12  |
| FAM92A1 | 1.646  | 0     |
| FAM92A3 | 1.228  | 0     |
| FAM92B  | 1.897  | 0.05  |
| FAM96A  | 1.605  | 4.99  |
| FAM96B  | 1.063  | 12.57 |
| FAM98A  | 2.745  | 2.77  |
| FAM98B  | 3.416  | 3.99  |
| FAM98C  | 1.204  | 2.88  |
| FAM99A  | 1.989  | 0     |
| FAM9A   | 1.519  | 0     |
| FAM9B   | 1.34   | 0     |
| FAM9C   | 3.239  | 0.03  |
| FANCA   | 6.181  | 2.29  |
| FANCB   | 3.008  | 0.06  |
| FANCC   | 4.592  | 0.77  |
| FANCD2  | 6.043  | 1.52  |
| FANCE   | 2.555  | 0.46  |
| FANCF   | 3.309  | 0.9   |
| FANCG   | 2.631  | 3.35  |
| FANCL   | 1.716  | 1.85  |
| FANCM   | 7.125  | 0.44  |
| FANK1   | 1.296  | 0     |
| FAP     | 2.78   | 0     |
| FAR1    | 0.21   | 18.84 |
| FAR10   | 0.191  | 29.53 |
| FAR11   | 0.833  | 21.26 |
| FAR13   | 0.171  | 59.59 |
| FAR14   | 0.183  | 25.41 |
| FAR16   | 0.13   | 30.44 |
| FAR17   | 0.631  | 36.85 |
| FAR18   | 0.586  | 40.01 |
| FAR19   | 0.523  | 18.16 |
| FAR2    | 1.23   | 15.45 |
| FAR20   | 0.256  | 60.68 |
| FAR3    | 0.217  | 17.32 |
| FAR4    | 3.635  | 45.54 |
| FAR5    | 1.794  | 20.18 |
| FAR6    | 0.285  | 10.76 |
| FAR7    | 0.311  | 11.46 |
| FAR8    | 0.647  | 15.45 |
| FAR9    | 14.849 | 68.7  |
| FARP1   | 5.74   | 4.52  |
| FARP2   | 3.997  | 1.83  |
| FARS2   | 1.698  | 3.96  |
| FARSA   | 1.808  | 3.12  |
| FARSB   | 3.118  | 3.43  |
| FAS     | 6.169  | 0.18  |
| FASLG   | 1.86   | 0     |
| FASN    | 8.458  | 10.24 |

|         |        |        |
|---------|--------|--------|
| FASTK   | 3.704  | 3.21   |
| FASTKD1 | 2.898  | 1.88   |
| FASTKD2 | 2.894  | 2.5    |
| FASTKD3 | 2.402  | 0.95   |
| FASTKD5 | 2.863  | 10.47  |
| FAT     | 14.764 | 0.01   |
| FAT1P1  | 0.506  | 0      |
| FAT2    | 14.535 | 0      |
| FAT3    | 19.163 | 0      |
| FAT4    | 9.669  | 0      |
| FATE1   | 1.071  | 0      |
| FAU     | 0.56   | 699.45 |
| FAUP1   | 0.414  | 688.97 |
| FBF1    | 5.149  | 0.58   |
| FBL     | 1.079  | 149.83 |
| FBLIM1  | 4.139  | 0      |
| FBLN1   | 4.857  | 0      |
| FBLN2   | 4.325  | 0      |
| FBLN5   | 2.622  | 0      |
| FBN1    | 11.626 | 0.04   |
| FBN2    | 10.724 | 0      |
| FBN3    | 8.967  | 0      |
| FBP1    | 1.476  | 0.27   |
| FBP2    | 1.305  | 0      |
| FBS1    | 2.794  | 25.85  |
| FBXL10  | 6.912  | 18.76  |
| FBXL11  | 6.499  | 37.13  |
| FBXL12  | 1.852  | 14.21  |
| FBXL13  | 6.16   | 1.64   |
| FBXL14  | 2.111  | 1.69   |
| FBXL15  | 2.344  | 2.87   |
| FBXL16  | 3.416  | 0.58   |
| FBXL17  | 3.673  | 1.43   |
| FBXL18  | 5.05   | 1.26   |
| FBXL19  | 3.312  | 5.35   |
| FBXL2   | 2.368  | 0      |
| FBXL20  | 3.76   | 9.73   |
| FBXL21  | 1.333  | 0      |
| FBXL22  | 1.482  | 0      |
| FBXL3   | 3.468  | 17.57  |
| FBXL4   | 2.777  | 3.42   |
| FBXL5   | 3.758  | 11.5   |
| FBXL6   | 1.791  | 4.09   |
| FBXL7   | 4.562  | 0.04   |
| FBXL8   | 1.599  | 4.45   |
| FBXO10  | 4.564  | 0.3    |
| FBXO11  | 5.44   | 22.95  |
| FBXO15  | 1.682  | 0.06   |
| FBXO16  | 1.292  | 0      |
| FBXO17  | 2.696  | 0      |

|          |        |       |
|----------|--------|-------|
| FBXO18   | 3.798  | 8.54  |
| FBXO2    | 1.536  | 0.06  |
| FBXO21   | 4.424  | 4.65  |
| FBXO22   | 3.907  | 0.74  |
| FBXO24   | 5.056  | 0.65  |
| FBXO25   | 2.687  | 1.73  |
| FBXO27   | 2.324  | 0     |
| FBXO28   | 2.924  | 4.2   |
| FBXO3    | 2.986  | 10.87 |
| FBXO30   | 4.408  | 2.9   |
| FBXO31   | 4.997  | 20.85 |
| FBXO32   | 1.855  | 4.59  |
| FBXO33   | 3.683  | 8.57  |
| FBXO34   | 3.537  | 14.18 |
| FBXO36   | 0.909  | 0.11  |
| FBXO38   | 4.886  | 6.62  |
| FBXO39   | 1.647  | 0.06  |
| FBXO4    | 2.462  | 0.88  |
| FBXO40   | 3.411  | 0     |
| FBXO41   | 7.121  | 1.58  |
| FBXO42   | 2.976  | 10.04 |
| FBXO43   | 2.892  | 0.04  |
| FBXO44   | 5.823  | 3.37  |
| FBXO45   | 0.561  | 1.94  |
| FBXO46   | 3.003  | 2.93  |
| FBXO47   | 2.269  | 0     |
| FBXO5    | 2.064  | 1.82  |
| FBXO6    | 1.52   | 0.78  |
| FBXO7    | 2.737  | 49.6  |
| FBXO8    | 2.564  | 5.13  |
| FBXO9    | 5.762  | 2.69  |
| FBXW10   | 3.456  | 0     |
| FBXW11   | 4.638  | 13.57 |
| FBXW11P1 | 1.134  | 2.62  |
| FBXW12   | 1.647  | 0     |
| FBXW2    | 1.875  | 23.91 |
| FBXW4    | 3.174  | 18.45 |
| FBXW5    | 2.345  | 10.46 |
| FBXW7    | 5.823  | 62.85 |
| FBXW8    | 4.975  | 2.09  |
| FBXW9    | 1.713  | 1.21  |
| FCAMR    | 2.133  | 0     |
| FCAR     | 4.396  | 1.26  |
| FCER1A   | 1.165  | 0.09  |
| FCER1G   | 0.591  | 10.55 |
| FCER2    | 1.561  | 1.27  |
| FCF1     | 2.409  | 6.24  |
| FCGBP    | 16.382 | 0.05  |
| FCGR1A   | 2.138  | 0.05  |
| FCGR2A   | 2.411  | 7.51  |

|        |        |       |
|--------|--------|-------|
| FCGR2B | 1.888  | 1.2   |
| FCGR2C | 1.56   | 7.36  |
| FCGR3A | 2.31   | 1.12  |
| FCGR3B | 1.971  | 0.8   |
| FCGRT  | 2.148  | 81.71 |
| FCHO1  | 3.154  | 1.48  |
| FCHO2  | 4.89   | 2.81  |
| FCHSD1 | 4.32   | 1     |
| FCHSD2 | 4.339  | 4.38  |
| FCMD   | 7.35   | 0.89  |
| FCN1   | 1.285  | 13.62 |
| FCN2   | 1.057  | 0.09  |
| FCN3   | 1.032  | 0.1   |
| FCRL1  | 2.592  | 1.22  |
| FCRL2  | 3.268  | 0.36  |
| FCRL3  | 3.422  | 0.09  |
| FCRL4  | 3.459  | 0     |
| FCRL5  | 5.39   | 0     |
| FCRL6  | 1.306  | 0.08  |
| FCRLA  | 2.345  | 0.04  |
| FCRLB  | 1.768  | 0     |
| FDFT1  | 2.985  | 29.4  |
| FDPS   | 1.684  | 15.22 |
| FDPSL1 | 1.155  | 0.77  |
| FDPSP  | 0.561  | 0     |
| FDX1   | 3.219  | 2.58  |
| FDXP1  | 0.676  | 3.52  |
| FDXP2  | 0.975  | 0     |
| FDXR   | 2.259  | 1.05  |
| FECH   | 3.962  | 1.24  |
| FECHP  | 2.414  | 0.04  |
| FEM1A  | 3.799  | 7.89  |
| FEM1B  | 2.559  | 13.92 |
| FEM1C  | 6.444  | 12.43 |
| FEN1   | 2.249  | 5.9   |
| FER    | 3.191  | 2.17  |
| FER1L3 | 6.808  | 0.12  |
| FER1L4 | 45.093 | 0.04  |
| FERD3L | 1.28   | 0     |
| FERP   | 0.793  | 10.48 |
| FES    | 2.762  | 5.88  |
| FETUB  | 1.627  | 0     |
| FEV    | 1.879  | 0     |
| FEZ1   | 3.252  | 0     |
| FEZ2   | 1.917  | 2.84  |
| FEZF1  | 3.048  | 0     |
| FEZF2  | 1.905  | 0     |
| FFAR1  | 1.89   | 10.36 |
| FFAR2  | 0.993  | 0.2   |
| FFAR3  | 1.66   | 0.06  |



|          |        |        |
|----------|--------|--------|
| FGA      | 5.297  | 0      |
| FGB      | 1.937  | 0      |
| FGD1     | 4.275  | 3.36   |
| FGD2     | 3.044  | 3.38   |
| FGD3     | 0.1    | 632.21 |
| FGD4     | 2.931  | 1.32   |
| FGD5     | 5.383  | 0.35   |
| FGD6     | 4.996  | 2.02   |
| FGF1     | 4.281  | 0      |
| FGF10    | 0.627  | 0      |
| FGF11    | 2.715  | 0.18   |
| FGF12    | 3.054  | 0      |
| FGF13    | 2.788  | 0      |
| FGF14    | 1.194  | 0      |
| FGF16    | 0.35   | 0.57   |
| FGF17    | 1.223  | 0      |
| FGF18    | 1.528  | 0      |
| FGF19    | 2.137  | 0      |
| FGF2     | 6.774  | 0.04   |
| FGF20    | 1.016  | 0      |
| FGF21    | 0.885  | 0      |
| FGF22    | 0.513  | 0      |
| FGF23    | 3.018  | 0.13   |
| FGF3     | 1.548  | 0      |
| FGF4     | 1.22   | 0      |
| FGF5     | 10.082 | 0      |
| FGF6     | 0.744  | 1.6    |
| FGF7     | 3.852  | 0      |
| FGF8     | 1.252  | 0      |
| FGF9     | 1.417  | 0      |
| FGFBP1   | 1.182  | 0      |
| FGFBP2   | 1.137  | 2.61   |
| FGFBP3   | 2.545  | 0.82   |
| FGFR1    | 9.532  | 22.02  |
| FGFR1OP  | 1.885  | 4.83   |
| FGFR1OP2 | 2.3    | 7.18   |
| FGFR2    | 6.089  | 0      |
| FGFR3    | 4.069  | 0.03   |
| FGFR4    | 3.404  | 0.2    |
| FGFRL1   | 3.253  | 0.34   |
| FGG      | 2.152  | 0      |
| FGL1     | 1.556  | 0      |
| FGL2     | 2.938  | 0.64   |
| FGR      | 2.352  | 3.7    |
| FH       | 1.79   | 6.91   |
| FHAD1    | 5.217  | 0.05   |
| FHIT     | 1.081  | 13.36  |
| FHL1     | 3.816  | 98.36  |
| FHL2     | 2.52   | 0      |
| FHL3     | 1.704  | 12.83  |

|          |        |        |
|----------|--------|--------|
| FHL5     | 2.124  | 0      |
| FHOD1    | 3.758  | 6.66   |
| FHOD3    | 4.942  | 0.08   |
| FIBCD1   | 3.179  | 0      |
| FIBP     | 1.584  | 11.74  |
| FIGF     | 2.111  | 0      |
| FIGLA    | 0.722  | 0      |
| FIGN     | 4.535  | 0.09   |
| FIGNL1   | 6.97   | 0.72   |
| FILIP1   | 4.622  | 0      |
| FILIP1L  | 6.987  | 0.27   |
| FIP1L1   | 2.154  | 16.4   |
| FIS1     | 1.468  | 16.51  |
| FIZ1     | 2.651  | 1.75   |
| FJX1     | 2.359  | 0.04   |
| FKBP10   | 2.644  | 0.04   |
| FKBP11   | 0.702  | 7.33   |
| FKBP14   | 4.494  | 0.47   |
| FKBP15   | 4.588  | 6.11   |
| FKBP1A   | 2.43   | 22.4   |
| FKBP1B   | 1.571  | 0      |
| FKBP1C   | 16.372 | 0.28   |
| FKBP2    | 0.908  | 2.18   |
| FKBP3    | 1.378  | 7.82   |
| FKBP4    | 2.233  | 1.42   |
| FKBP5    | 5.38   | 115.29 |
| FKBP6    | 2.986  | 1.42   |
| FKBP7    | 1.355  | 0.07   |
| FKBP8    | 2.135  | 77.3   |
| FKBP9    | 6.852  | 0.75   |
| FKBP9L   | 4.902  | 0.16   |
| FKBPL    | 2.688  | 2.5    |
| FKHL18   | 1.318  | 0.07   |
| FKRP     | 3.702  | 3.45   |
| FKSG2    | 0.521  | 1.9    |
| FKSG24   | 1.275  | 0.93   |
| FKSG30   | 1.401  | 0.14   |
| FKSG43   | 1.8    | 2.31   |
| FKSG44   | 3.67   | 27.34  |
| FKSG74   | 1.378  | 0      |
| FKSG83   | 1.165  | 0      |
| FLAD1    | 2.474  | 4.92   |
| FLCN     | 4.139  | 2.01   |
| FLG      | 12.747 | 0.01   |
| FLI1     | 4.325  | 15.33  |
| FLII     | 4.163  | 16.97  |
| FLJ00038 | 0.795  | 2.49   |
| FLJ10081 | 5.249  | 9.71   |
| FLJ10120 | 11.659 | 0.39   |
| FLJ10154 | 4.009  | 81.15  |

|          |       |       |
|----------|-------|-------|
| FLJ10159 | 4.238 | 0.04  |
| FLJ10213 | 1.679 | 4.3   |
| FLJ10241 | 1.692 | 9     |
| FLJ10292 | 2.579 | 1.57  |
| FLJ10324 | 7.693 | 3.3   |
| FLJ10357 | 5.458 | 0.76  |
| FLJ10404 | 4.6   | 26.63 |
| FLJ10490 | 0.743 | 0.4   |
| FLJ10661 | 2.572 | 0.16  |
| FLJ10769 | 2.659 | 17    |
| FLJ10781 | 3.653 | 0     |
| FLJ10815 | 3.36  | 7.27  |
| FLJ10847 | 3.279 | 0     |
| FLJ10916 | 2.049 | 0.04  |
| FLJ10986 | 1.896 | 1.78  |
| FLJ11151 | 2.845 | 0.91  |
| FLJ11171 | 3.956 | 1.48  |
| FLJ11184 | 1.748 | 1.87  |
| FLJ11235 | 2.022 | 0     |
| FLJ11286 | 1.911 | 7.2   |
| FLJ11506 | 2.756 | 6.93  |
| FLJ11783 | 1.493 | 1.46  |
| FLJ12331 | 2.057 | 0     |
| FLJ12529 | 3.497 | 25.01 |
| FLJ12595 | 1.904 | 0.99  |
| FLJ12684 | 2.744 | 0     |
| FLJ12716 | 5.568 | 2.63  |
| FLJ12886 | 1.587 | 2.37  |
| FLJ12949 | 3.235 | 10.21 |
| FLJ12993 | 1.888 | 0.68  |
| FLJ13195 | 4.216 | 1.55  |
| FLJ13197 | 2.368 | 8.27  |
| FLJ13224 | 1.63  | 0.12  |
| FLJ13231 | 8.441 | 0.85  |
| FLJ13236 | 1.839 | 0     |
| FLJ13305 | 1.929 | 0.11  |
| FLJ13611 | 2.724 | 4.51  |
| FLJ14082 | 3.56  | 0.03  |
| FLJ14107 | 1.792 | 0     |
| FLJ14154 | 2.553 | 10    |
| FLJ14186 | 3.845 | 1.41  |
| FLJ14213 | 4.996 | 5.79  |
| FLJ14397 | 2.835 | 0.35  |
| FLJ14668 | 1.787 | 4.98  |
| FLJ14712 | 6.328 | 0     |
| FLJ14803 | 6.712 | 0.78  |
| FLJ14816 | 1.787 | 0     |
| FLJ14959 | 2.578 | 3.1   |
| FLJ16008 | 4.685 | 0     |
| FLJ16124 | 1.823 | 0     |

|          |       |       |
|----------|-------|-------|
| FLJ16126 | 1.983 | 0.05  |
| FLJ16165 | 2.311 | 0     |
| FLJ16171 | 2.143 | 0.05  |
| FLJ16237 | 4.95  | 0     |
| FLJ16287 | 3.185 | 1.46  |
| FLJ16331 | 1.78  | 0     |
| FLJ16369 | 1.164 | 0     |
| FLJ16423 | 0.405 | 0     |
| FLJ16478 | 1.976 | 0.15  |
| FLJ16641 | 2.881 | 0     |
| FLJ16686 | 2.346 | 0     |
| FLJ16734 | 4.436 | 0     |
| FLJ16793 | 2.355 | 0.12  |
| FLJ20021 | 1.138 | 3.22  |
| FLJ20035 | 6.015 | 0.29  |
| FLJ20054 | 2.012 | 1.18  |
| FLJ20105 | 8.175 | 0.04  |
| FLJ20152 | 4.085 | 5.01  |
| FLJ20160 | 4.293 | 6.66  |
| FLJ20184 | 1.437 | 0     |
| FLJ20186 | 4.38  | 8.15  |
| FLJ20254 | 2.7   | 2.05  |
| FLJ20273 | 4.009 | 3.53  |
| FLJ20294 | 5.381 | 29.66 |
| FLJ20309 | 4.485 | 6.88  |
| FLJ20323 | 6.114 | 2.57  |
| FLJ20366 | 3.43  | 0.12  |
| FLJ20433 | 2.772 | 1.75  |
| FLJ20444 | 3.768 | 0.03  |
| FLJ20464 | 0.7   | 0.57  |
| FLJ20489 | 1.927 | 10.42 |
| FLJ20581 | 2.428 | 0     |
| FLJ20628 | 2.084 | 4.65  |
| FLJ20674 | 4.486 | 16.04 |
| FLJ20699 | 2.566 | 2.08  |
| FLJ20850 | 2.275 | 7.65  |
| FLJ20920 | 2.157 | 5.55  |
| FLJ21062 | 6.076 | 0.02  |
| FLJ21075 | 1.294 | 0     |
| FLJ21438 | 3.379 | 12.74 |
| FLJ21511 | 2.471 | 0     |
| FLJ21687 | 2.991 | 0.17  |
| FLJ21767 | 3.804 | 1.27  |
| FLJ21839 | 4.635 | 16.43 |
| FLJ21865 | 3.95  | 12.3  |
| FLJ21908 | 2.258 | 2.32  |
| FLJ21963 | 3.033 | 0     |
| FLJ21986 | 10.55 | 0.13  |
| FLJ22028 | 3.169 | 1.9   |
| FLJ22184 | 3.773 | 0     |

|          |        |       |
|----------|--------|-------|
| FLJ22222 | 1.85   | 3.8   |
| FLJ22374 | 5.466  | 0.29  |
| FLJ22447 | 1.312  | 2.27  |
| FLJ22531 | 2.135  | 2.6   |
| FLJ22639 | 1.301  | 4.26  |
| FLJ22655 | 1.134  | 0     |
| FLJ22659 | 0.535  | 0     |
| FLJ22662 | 1.934  | 1.48  |
| FLJ22671 | 1.958  | 0     |
| FLJ22675 | 1.191  | 0     |
| FLJ22763 | 0.738  | 0     |
| FLJ22795 | 2.546  | 0     |
| FLJ23049 | 3.232  | 0     |
| FLJ23152 | 2.085  | 0     |
| FLJ23356 | 1.611  | 1.54  |
| FLJ23577 | 7.154  | 0.23  |
| FLJ23588 | 4.867  | 0     |
| FLJ23834 | 7.626  | 0.2   |
| FLJ23861 | 5.41   | 1.21  |
| FLJ25006 | 1.433  | 2.28  |
| FLJ25037 | 5.092  | 0     |
| FLJ25076 | 4.419  | 0.02  |
| FLJ25328 | 1.687  | 0     |
| FLJ25371 | 1.398  | 5.8   |
| FLJ25416 | 3.533  | 0.03  |
| FLJ25439 | 1.225  | 0     |
| FLJ25476 | 3.106  | 16.25 |
| FLJ25680 | 1.295  | 0     |
| FLJ25715 | 1.111  | 0     |
| FLJ25758 | 1.424  | 0     |
| FLJ25770 | 1.917  | 0     |
| FLJ25778 | 17.344 | 0.47  |
| FLJ25791 | 1.559  | 0.32  |
| FLJ25801 | 1.3    | 0     |
| FLJ25967 | 2.482  | 1.75  |
| FLJ25996 | 1.828  | 0     |
| FLJ26056 | 1.87   | 0     |
| FLJ26245 | 0.356  | 0     |
| FLJ26443 | 2.241  | 0.04  |
| FLJ26850 | 1.525  | 0     |
| FLJ27255 | 2.002  | 0     |
| FLJ27365 | 2.27   | 0.39  |
| FLJ27505 | 0.459  | 0     |
| FLJ27523 | 1.296  | 0     |
| FLJ30064 | 4.162  | 0.38  |
| FLJ30092 | 11.209 | 6.91  |
| FLJ30277 | 2.179  | 0     |
| FLJ30313 | 2.585  | 0     |
| FLJ30375 | 2.456  | 0     |
| FLJ30403 | 2.663  | 0.15  |

|          |       |       |
|----------|-------|-------|
| FLJ30428 | 2.281 | 0     |
| FLJ30430 | 0.458 | 0     |
| FLJ30851 | 2.2   | 0     |
| FLJ30934 | 1.705 | 1.22  |
| FLJ31033 | 7.127 | 1.33  |
| FLJ31222 | 1.954 | 0.1   |
| FLJ31438 | 2.248 | 0.75  |
| FLJ31485 | 0.63  | 0     |
| FLJ31568 | 2.138 | 0.04  |
| FLJ31659 | 2.174 | 0     |
| FLJ31818 | 5.858 | 1.27  |
| FLJ31951 | 3.914 | 14.61 |
| FLJ32011 | 2.32  | 0     |
| FLJ32063 | 3.197 | 0     |
| FLJ32065 | 0.937 | 0.84  |
| FLJ32214 | 2.214 | 0     |
| FLJ32252 | 2.864 | 0     |
| FLJ32312 | 2.097 | 1.41  |
| FLJ32447 | 1.699 | 0     |
| FLJ32549 | 2.576 | 0.27  |
| FLJ32569 | 2.149 | 0.32  |
| FLJ32658 | 2.052 | 0     |
| FLJ32679 | 2.802 | 0     |
| FLJ32682 | 2.421 | 0     |
| FLJ32745 | 2.196 | 0.22  |
| FLJ32756 | 1.972 | 0.1   |
| FLJ32784 | 3.725 | 0     |
| FLJ32810 | 4.82  | 0     |
| FLJ32894 | 1.71  | 0     |
| FLJ32955 | 1.832 | 0     |
| FLJ33360 | 2.419 | 0.04  |
| FLJ33534 | 2.068 | 0     |
| FLJ33544 | 2.148 | 0     |
| FLJ33590 | 2.163 | 6.08  |
| FLJ33790 | 1.497 | 0.27  |
| FLJ34047 | 1.161 | 0     |
| FLJ34048 | 1.304 | 0     |
| FLJ34503 | 2.255 | 0     |
| FLJ34521 | 2.12  | 0.1   |
| FLJ34651 | 1.99  | 0.3   |
| FLJ34931 | 7.044 | 0.03  |
| FLJ35220 | 2.815 | 0.52  |
| FLJ35348 | 5.179 | 1.41  |
| FLJ35379 | 1.168 | 0     |
| FLJ35409 | 2.102 | 0     |
| FLJ35424 | 2.367 | 0     |
| FLJ35530 | 2.577 | 0.08  |
| FLJ35695 | 2.043 | 0     |
| FLJ35767 | 1.907 | 0     |
| FLJ35773 | 2.107 | 0     |

|          |       |      |
|----------|-------|------|
| FLJ35776 | 1.966 | 0.4  |
| FLJ35785 | 5.596 | 0    |
| FLJ35816 | 2.165 | 0    |
| FLJ35848 | 4.069 | 0    |
| FLJ35880 | 2.689 | 0    |
| FLJ35934 | 1.871 | 2.64 |
| FLJ35946 | 0.687 | 0.14 |
| FLJ36031 | 4.886 | 2.03 |
| FLJ36032 | 0.656 | 0    |
| FLJ36070 | 1.825 | 0.27 |
| FLJ36116 | 0.207 | 0    |
| FLJ36144 | 2.09  | 0    |
| FLJ36157 | 5.334 | 0    |
| FLJ36166 | 7.324 | 0.04 |
| FLJ36208 | 2.044 | 0.87 |
| FLJ36492 | 8.687 | 0.07 |
| FLJ36644 | 2.825 | 0    |
| FLJ36840 | 2.518 | 0    |
| FLJ36848 | 3.004 | 0.2  |
| FLJ36874 | 3.636 | 6.83 |
| FLJ37034 | 2.983 | 0.17 |
| FLJ37060 | 2.001 | 0.05 |
| FLJ37078 | 4.488 | 0.02 |
| FLJ37228 | 0.396 | 0    |
| FLJ37357 | 2.435 | 0    |
| FLJ37396 | 2.259 | 0.09 |
| FLJ37440 | 2.299 | 0.17 |
| FLJ37464 | 2.061 | 1.24 |
| FLJ37512 | 0.876 | 0    |
| FLJ37538 | 7.162 | 0.43 |
| FLJ37543 | 2.97  | 0    |
| FLJ37644 | 0.34  | 0    |
| FLJ37673 | 1.24  | 6.62 |
| FLJ37786 | 2.197 | 0    |
| FLJ37953 | 5.134 | 3.41 |
| FLJ38020 | 2.289 | 1.08 |
| FLJ38028 | 0.829 | 0    |
| FLJ38377 | 3.168 | 0.04 |
| FLJ38379 | 4.035 | 7.84 |
| FLJ38482 | 2.225 | 0.53 |
| FLJ38576 | 2.721 | 0    |
| FLJ38596 | 2.125 | 0    |
| FLJ38668 | 2.527 | 0.08 |
| FLJ38717 | 2.617 | 2.65 |
| FLJ38723 | 2.919 | 0.03 |
| FLJ38894 | 1.789 | 0    |
| FLJ38973 | 3.678 | 0.94 |
| FLJ38984 | 2.934 | 0.44 |
| FLJ39061 | 2.441 | 0    |
| FLJ39080 | 2.125 | 0    |

|          |       |       |
|----------|-------|-------|
| FLJ39198 | 3.89  | 0     |
| FLJ39237 | 5.862 | 0.04  |
| FLJ39378 | 2.1   | 4.14  |
| FLJ39501 | 2.607 | 0     |
| FLJ39502 | 3.786 | 0.97  |
| FLJ39531 | 3.046 | 0     |
| FLJ39575 | 3.39  | 0.18  |
| FLJ39632 | 4.779 | 2.84  |
| FLJ39639 | 2.486 | 1.87  |
| FLJ39653 | 2.207 | 66.88 |
| FLJ39660 | 3.685 | 0.19  |
| FLJ39739 | 2.212 | 0.18  |
| FLJ39743 | 3.298 | 0     |
| FLJ39779 | 1.727 | 4.92  |
| FLJ39822 | 1.621 | 0     |
| FLJ40113 | 1.923 | 1.86  |
| FLJ40125 | 1.718 | 0.28  |
| FLJ40142 | 1.946 | 3.2   |
| FLJ40172 | 2.048 | 0.05  |
| FLJ40176 | 7.453 | 0     |
| FLJ40194 | 2.317 | 0     |
| FLJ40235 | 1.706 | 0     |
| FLJ40243 | 5.239 | 0     |
| FLJ40244 | 0.77  | 0     |
| FLJ40288 | 3.996 | 0     |
| FLJ40292 | 1.749 | 0.4   |
| FLJ40296 | 1.847 | 0     |
| FLJ40298 | 1.713 | 0     |
| FLJ40330 | 2.295 | 0.13  |
| FLJ40411 | 3.761 | 0.16  |
| FLJ40434 | 1     | 0     |
| FLJ40448 | 2.137 | 0.04  |
| FLJ40453 | 1.726 | 0     |
| FLJ40504 | 1.95  | 0     |
| FLJ40606 | 2.48  | 0.68  |
| FLJ40722 | 5.91  | 0.59  |
| FLJ40852 | 4.524 | 0.28  |
| FLJ40869 | 3.024 | 4.26  |
| FLJ40941 | 0.973 | 0     |
| FLJ41046 | 2.695 | 0     |
| FLJ41047 | 1.986 | 0.05  |
| FLJ41170 | 1.725 | 0     |
| FLJ41200 | 2.317 | 0     |
| FLJ41278 | 0.629 | 0     |
| FLJ41309 | 2.511 | 0.04  |
| FLJ41352 | 4.562 | 27.33 |
| FLJ41423 | 2.597 | 0     |
| FLJ41481 | 1.949 | 0.1   |
| FLJ41484 | 3.249 | 5.42  |
| FLJ41603 | 4.865 | 0.02  |



|          |       |       |
|----------|-------|-------|
| FLJ41649 | 3.122 | 0.19  |
| FLJ41733 | 2.816 | 0     |
| FLJ41766 | 3.332 | 0     |
| FLJ41821 | 2.209 | 0     |
| FLJ41841 | 3.232 | 0     |
| FLJ41856 | 3.016 | 0     |
| FLJ41993 | 3.635 | 0.03  |
| FLJ42022 | 2.222 | 0.09  |
| FLJ42102 | 2.162 | 0     |
| FLJ42117 | 2.551 | 0     |
| FLJ42133 | 2.112 | 0     |
| FLJ42177 | 2.499 | 0     |
| FLJ42220 | 0.582 | 0     |
| FLJ42258 | 2.299 | 0.04  |
| FLJ42280 | 5.414 | 0     |
| FLJ42289 | 1.56  | 0     |
| FLJ42291 | 5.248 | 0     |
| FLJ42393 | 2.355 | 0.08  |
| FLJ42418 | 2.13  | 0     |
| FLJ42562 | 3.023 | 0.06  |
| FLJ42627 | 3.535 | 0.67  |
| FLJ42842 | 2.645 | 0     |
| FLJ42953 | 1.832 | 0     |
| FLJ42957 | 1.597 | 2.36  |
| FLJ42986 | 1.312 | 0.68  |
| FLJ43080 | 4.217 | 0     |
| FLJ43093 | 1.787 | 0     |
| FLJ43276 | 2.15  | 2.25  |
| FLJ43339 | 7.848 | 74.59 |
| FLJ43390 | 2.927 | 0     |
| FLJ43505 | 1.994 | 0     |
| FLJ43582 | 2.25  | 0     |
| FLJ43681 | 2.381 | 0     |
| FLJ43692 | 3.836 | 0.29  |
| FLJ43752 | 2.107 | 0     |
| FLJ43763 | 2.007 | 0     |
| FLJ43806 | 4.13  | 0     |
| FLJ43826 | 3.229 | 0     |
| FLJ43859 | 4.871 | 0     |
| FLJ43860 | 4.164 | 0.03  |
| FLJ43879 | 3.489 | 0     |
| FLJ43950 | 4.762 | 0     |
| FLJ43980 | 3.706 | 0     |
| FLJ43987 | 3.045 | 0     |
| FLJ44005 | 3.531 | 1.77  |
| FLJ44006 | 3.026 | 0     |
| FLJ44048 | 4.293 | 0     |
| FLJ44054 | 2.928 | 0     |
| FLJ44060 | 6.146 | 0     |
| FLJ44076 | 3.36  | 0.06  |

|          |        |      |
|----------|--------|------|
| FLJ44124 | 6.024  | 0.32 |
| FLJ44290 | 2.157  | 2.75 |
| FLJ44313 | 2.077  | 0    |
| FLJ44379 | 1.684  | 0    |
| FLJ44385 | 3.894  | 0    |
| FLJ44450 | 1.599  | 0    |
| FLJ44451 | 0.512  | 2.13 |
| FLJ44477 | 2.433  | 0.08 |
| FLJ44606 | 0.708  | 0    |
| FLJ44635 | 2.268  | 31.1 |
| FLJ44653 | 2.385  | 0    |
| FLJ44691 | 3.78   | 0    |
| FLJ44790 | 3.21   | 0    |
| FLJ44796 | 3.756  | 0.52 |
| FLJ44815 | 3.997  | 0    |
| FLJ44817 | 1.949  | 0    |
| FLJ44838 | 4.199  | 0    |
| FLJ44861 | 1.577  | 0    |
| FLJ44881 | 2.337  | 0    |
| FLJ44894 | 3.33   | 0.15 |
| FLJ44955 | 2.704  | 0.04 |
| FLJ44968 | 0.982  | 2.52 |
| FLJ45032 | 3.962  | 1.3  |
| FLJ45079 | 4.678  | 0    |
| FLJ45121 | 4.521  | 1.42 |
| FLJ45139 | 3.823  | 0    |
| FLJ45187 | 6.328  | 0.06 |
| FLJ45224 | 3.706  | 0    |
| FLJ45244 | 2.331  | 0.26 |
| FLJ45248 | 2.77   | 0.32 |
| FLJ45256 | 2.907  | 0    |
| FLJ45337 | 4.063  | 0    |
| FLJ45340 | 7.078  | 1.38 |
| FLJ45422 | 13.761 | 0.04 |
| FLJ45445 | 4.402  | 0.68 |
| FLJ45455 | 1.772  | 0.34 |
| FLJ45508 | 1.84   | 0.16 |
| FLJ45513 | 0.905  | 1.2  |
| FLJ45530 | 3.186  | 0.03 |
| FLJ45537 | 3.409  | 0    |
| FLJ45557 | 4.407  | 0    |
| FLJ45684 | 2.896  | 0.68 |
| FLJ45717 | 2.258  | 0    |
| FLJ45721 | 2.509  | 0    |
| FLJ45743 | 2.558  | 0.04 |
| FLJ45803 | 5.443  | 0.45 |
| FLJ45825 | 3.815  | 0.19 |
| FLJ45831 | 3.008  | 0    |
| FLJ45872 | 4.146  | 0    |
| FLJ45909 | 3.021  | 1.18 |

|          |        |       |
|----------|--------|-------|
| FLJ45910 | 1.996  | 0.15  |
| FLJ45964 | 3.7    | 0     |
| FLJ45966 | 3.204  | 0.28  |
| FLJ45974 | 6.968  | 0     |
| FLJ45983 | 2.214  | 0     |
| FLJ45994 | 1.352  | 0     |
| FLJ46010 | 2.375  | 0     |
| FLJ46020 | 2.261  | 0     |
| FLJ46026 | 3.133  | 0     |
| FLJ46082 | 1.789  | 0.05  |
| FLJ46109 | 8.105  | 0.01  |
| FLJ46111 | 1.828  | 0     |
| FLJ46120 | 3.051  | 0     |
| FLJ46121 | 1.802  | 0     |
| FLJ46210 | 2.657  | 0     |
| FLJ46266 | 3.099  | 0     |
| FLJ46284 | 3.37   | 0     |
| FLJ46300 | 3.35   | 0.03  |
| FLJ46309 | 3.032  | 0.16  |
| FLJ46321 | 4.828  | 0     |
| FLJ46347 | 3.129  | 0     |
| FLJ46358 | 5.065  | 0     |
| FLJ46361 | 21.25  | 0     |
| FLJ46363 | 3.957  | 0     |
| FLJ46365 | 3.602  | 0.03  |
| FLJ46481 | 3.178  | 0     |
| FLJ46688 | 3.221  | 0     |
| FLJ46831 | 2.764  | 0.04  |
| FLJ46836 | 3.258  | 0     |
| FLJ46838 | 2.243  | 0.22  |
| FLJ90086 | 4.337  | 0.05  |
| FLJ90650 | 4.502  | 0     |
| FLJ90680 | 2.17   | 0.05  |
| FLJ90709 | 2.463  | 1.64  |
| FLJ90757 | 2.088  | 0.57  |
| FLNA     | 8.368  | 17.01 |
| FLNB     | 9.429  | 11.95 |
| FLNC     | 18.284 | 0.02  |
| FLOT1    | 5.49   | 0     |
| FLOT2    | 2.632  | 15.11 |
| FLRT1    | 3.247  | 0.09  |
| FLRT2    | 7.179  | 0     |
| FLRT3    | 4.188  | 0     |
| FLT1     | 5.783  | 5.1   |
| FLT3     | 3.476  | 1.42  |
| FLT3LG   | 1.036  | 6.4   |
| FLT4     | 5.964  | 5.06  |
| FLVCR    | 1.99   | 1     |
| FLYWCH1  | 5.938  | 8.89  |
| FMN1     | 3.757  | 1.08  |

|        |        |       |
|--------|--------|-------|
| FMN2   | 6.633  | 0.02  |
| FMNL1  | 4.502  | 40.74 |
| FMNL2  | 5.575  | 0.48  |
| FMNL3  | 11.183 | 3.88  |
| FMO1   | 2.126  | 0     |
| FMO2   | 5.181  | 0     |
| FMO3   | 2.139  | 0     |
| FMO4   | 2.139  | 0.19  |
| FMO5   | 2.324  | 0.68  |
| FMO6P  | 25.949 | 0     |
| FMOD   | 2.986  | 0.63  |
| FMR1   | 5.378  | 12.81 |
| FMR1NB | 1.019  | 0     |
| FN1    | 9.665  | 0     |
| FN3K   | 1.377  | 0.44  |
| FN3KRP | 1.769  | 10.29 |
| FNBP1  | 5.863  | 19.68 |
| FNBP1L | 7.595  | 2     |
| FNBP4  | 4.609  | 37.93 |
| FNDC1  | 6.551  | 0     |
| FNDC3A | 6.001  | 4.76  |
| FNDC3B | 6.865  | 0.3   |
| FNDC4  | 1.631  | 0     |
| FNDC5  | 2.657  | 0.67  |
| FNDC7  | 2.384  | 0     |
| FNDC8  | 1.355  | 0.29  |
| FNIP1  | 6.567  | 12.57 |
| FNTA   | 1.942  | 19.52 |
| FNTAL1 | 1.636  | 1.63  |
| FNTAL2 | 1.141  | 0.52  |
| FNTB   | 2.819  | 3.4   |
| FOLH1  | 2.635  | 0.26  |
| FOLH2  | 0.155  | 0     |
| FOLR1  | 2      | 0     |
| FOLR1P | 1.068  | 0     |
| FOLR2  | 1.102  | 2.52  |
| FOLR3  | 0.845  | 0.47  |
| FOS    | 2.084  | 37.88 |
| FOSB   | 3.775  | 16.38 |
| FOSL1  | 1.668  | 0.18  |
| FOSL2  | 5.685  | 28.45 |
| FOXA1  | 3.112  | 0     |
| FOXA2  | 2.433  | 0     |
| FOXA3  | 1.989  | 0     |
| FOXB1  | 1.008  | 0     |
| FOXB2  | 1.299  | 0     |
| FOXC1  | 1.662  | 0     |
| FOXC2  | 1.506  | 0     |
| FOXD1  | 2.27   | 0     |
| FOXD2  | 4.675  | 0.17  |

|         |        |       |
|---------|--------|-------|
| FOXD3   | 1.437  | 0     |
| FOXD4   | 2.186  | 0     |
| FOXD4L1 | 2.25   | 0     |
| FOXD4L2 | 2.218  | 0     |
| FOXD4L4 | 3.109  | 0     |
| FOXD4L6 | 2.218  | 0     |
| FOXE1   | 3.461  | 0     |
| FOXE3   | 1.981  | 0     |
| FOXF1   | 2.514  | 0.04  |
| FOXF2   | 2.187  | 0.04  |
| FOXG1B  | 2.585  | 0     |
| FOXH1   | 1.8    | 0     |
| FOXI1   | 2.572  | 0     |
| FOXJ1   | 2.376  | 0.08  |
| FOXJ2   | 5.482  | 8.58  |
| FOXJ3   | 5.906  | 45.03 |
| FOXK1   | 22.382 | 4.87  |
| FOXK2   | 6.183  | 21.59 |
| FOXL1   | 1.038  | 0     |
| FOXL2   | 2.736  | 0     |
| FOXM1   | 3.626  | 4.06  |
| FOXN1   | 2.697  | 0     |
| FOXN2   | 5.388  | 1.96  |
| FOXN4   | 2.958  | 0     |
| FOXO1A  | 6.561  | 74.69 |
| FOXO1B  | 2.102  | 0.04  |
| FOXO3A  | 4.23   | 19.72 |
| FOXO3B  | 0.618  | 0.96  |
| FOXP1   | 7.604  | 32.49 |
| FOXP2   | 5.852  | 0.05  |
| FOXP3   | 1.869  | 0.43  |
| FOXP4   | 6.413  | 1.93  |
| FOXQ1   | 2.309  | 0     |
| FOXR1   | 1.153  | 0     |
| FOXR2   | 1.926  | 0     |
| FOXRED1 | 1.951  | 4.16  |
| FOXRED2 | 3.932  | 0.68  |
| FPGS    | 4.716  | 75.19 |
| FPGT    | 3.426  | 0.23  |
| FPR1    | 1.317  | 12.32 |
| FPRL1   | 2.042  | 0.77  |
| FPRL2   | 2.517  | 0     |
| FRAG1   | 1.952  | 6.19  |
| FRAP1   | 8.679  | 3.99  |
| FRAS1   | 15.209 | 0.03  |
| FRAT1   | 2.651  | 2.43  |
| FRAT2   | 2.205  | 6.42  |
| FRDAP   | 0.685  | 0     |
| FREM1   | 6.17   | 0.04  |
| FREM2   | 9.51   | 0     |

|        |       |       |
|--------|-------|-------|
| FREM3  | 7.179 | 0     |
| FREQ   | 4.314 | 0     |
| FRG1   | 1.043 | 19.16 |
| FRG2   | 2.084 | 0.19  |
| FRK    | 2.849 | 0     |
| FRMD1  | 3.005 | 0     |
| FRMD3  | 2.534 | 0.04  |
| FRMD4A | 6.815 | 0.18  |
| FRMD4B | 6.862 | 9.5   |
| FRMD5  | 2.243 | 0.09  |
| FRMD6  | 4.504 | 0     |
| FRMD7  | 3.2   | 0     |
| FRMPD1 | 4.916 | 0     |
| FRMPD2 | 6.45  | 0     |
| FRMPD3 | 7.309 | 0.03  |
| FRMPD4 | 6.352 | 0     |
| FRRS1  | 2.678 | 0.04  |
| FRS2   | 1.782 | 7.83  |
| FRS3   | 2.166 | 1.19  |
| FRY    | 10.71 | 0.04  |
| FRYL   | 2.365 | 0.34  |
| FRZB   | 2.035 | 0     |
| FSCN1  | 5.554 | 7.78  |
| FSCN2  | 1.527 | 0.13  |
| FSCN3  | 3.766 | 0     |
| FSD1   | 1.742 | 0     |
| FSD1L  | 4.532 | 0.42  |
| FSD2   | 2.679 | 0     |
| FSHB   | 1.969 | 0     |
| FSHR   | 2.382 | 0     |
| FSIP1  | 2.809 | 0     |
| FSIP2  | 2.726 | 0     |
| FST    | 1.529 | 3.82  |
| FSTL1  | 3.682 | 0.08  |
| FSTL3  | 2.5   | 5.62  |
| FSTL4  | 5.382 | 0.55  |
| FSTL5  | 4.83  | 0     |
| FTCD   | 2.113 | 0     |
| FTH1   | 2.432 | 85.51 |
| FTHL1  | 0.896 | 5.19  |
| FTHL10 | 0.805 | 1.36  |
| FTHL11 | 0.886 | 0.44  |
| FTHL12 | 0.912 | 0.54  |
| FTHL16 | 0.939 | 3.16  |
| FTHL17 | 0.813 | 0     |
| FTHL2  | 0.568 | 0.18  |
| FTHL3  | 0.954 | 0.31  |
| FTHL4  | 0.912 | 2.06  |
| FTHL7  | 0.91  | 2.61  |
| FTHL8  | 0.909 | 0.98  |

|          |        |        |
|----------|--------|--------|
| FTHP1    | 40.464 | 0      |
| FTHP2    | 0.812  | 0.49   |
| FTL      | 0.871  | 262.96 |
| FTLL1    | 0.978  | 14.57  |
| FTLP     | 0.827  | 0      |
| FTMT     | 0.879  | 0      |
| FTO      | 4.294  | 2.62   |
| FTSJ1    | 2.211  | 4.92   |
| FTSJ2    | 3.202  | 2.91   |
| FTSJ3    | 2.984  | 7.19   |
| FUBP1    | 3.365  | 29.67  |
| FUBP3    | 3.13   | 7.27   |
| FUCA1    | 2.031  | 7.64   |
| FUCA1P   | 2.028  | 0      |
| FUCA2    | 2.098  | 0.14   |
| FUK      | 3.907  | 1.32   |
| FUNDC1   | 1.147  | 5.61   |
| FUNDC2   | 2.964  | 6.78   |
| FUNDC2P  | 1.126  | 3.69   |
| FURIN    | 4.18   | 70.3   |
| FUS      | 6.656  | 54.53  |
| FUSIP1   | 4.199  | 23.49  |
| FUSSEL18 | 0.891  | 0      |
| FUT1     | 4.246  | 0.07   |
| FUT10    | 3.549  | 1.11   |
| FUT11    | 2.056  | 2.26   |
| FUT2     | 3.105  | 0      |
| FUT3     | 2.584  | 0.15   |
| FUT4     | 5.938  | 3.22   |
| FUT5     | 1.988  | 0.99   |
| FUT6     | 3.11   | 0      |
| FUT7     | 2.584  | 1.84   |
| FUT8     | 4.325  | 1.44   |
| FUT9     | 3.042  | 0      |
| FUZ      | 1.621  | 3.24   |
| FVT1     | 2.288  | 5.06   |
| FXC1     | 1.469  | 10.64  |
| FXN      | 3.793  | 1.49   |
| FXR1     | 5.722  | 31.24  |
| FXR2     | 2.844  | 2.12   |
| FXYD1    | 0.614  | 0.81   |
| FXYD2    | 0.644  | 0.46   |
| FXYD3    | 1.579  | 0.06   |
| FXYD4    | 0.771  | 0      |
| FXYD5    | 1.717  | 201.91 |
| FXYD6    | 1.675  | 2.66   |
| FXYD7    | 0.713  | 2.64   |
| FYB      | 4.828  | 0.35   |
| FYCO1    | 8.497  | 1.72   |
| FYN      | 5.31   | 26.9   |

|           |        |        |
|-----------|--------|--------|
| FYTTD1    | 4.319  | 21.6   |
| FZD1      | 8.7    | 0.72   |
| FZD10     | 3.254  | 0.03   |
| FZD2      | 1.983  | 0.15   |
| FZD3      | 3.933  | 0.1    |
| FZD4      | 7.383  | 0.47   |
| FZD5      | 2.561  | 0.08   |
| FZD6      | 3.754  | 7.91   |
| FZD7      | 3.851  | 0.18   |
| FZD8      | 3.186  | 21.62  |
| FZD9      | 4.684  | 0      |
| FZR1      | 5.342  | 15.02  |
| G0S2      | 0.866  | 4.23   |
| G13P1     | 0.825  | 0      |
| G3BP1     | 4.259  | 10.46  |
| G3BP2     | 4.451  | 20.47  |
| G6PC      | 3.096  | 0      |
| G6PC2     | 1.068  | 0      |
| G6PC3     | 1.558  | 3.81   |
| G6PD      | 2.631  | 12.11  |
| GAA       | 3.847  | 6.4    |
| GAB1      | 6.168  | 36.75  |
| GAB2      | 6.429  | 92.06  |
| GAB3      | 4.718  | 2.92   |
| GAB4      | 2.63   | 0      |
| GABARAP   | 0.893  | 157.44 |
| GABARAPL1 | 1.87   | 37.72  |
| GABARAPL2 | 1.002  | 18.46  |
| GABARAPL3 | 1.851  | 0.64   |
| GABBR1    | 19.626 | 0.01   |
| GABBR2    | 5.786  | 0      |
| GABPA     | 4.381  | 4.47   |
| GABPB2    | 4.682  | 37.8   |
| GABRA1    | 3.672  | 0      |
| GABRA2    | 2.179  | 0      |
| GABRA3    | 1.891  | 0      |
| GABRA4    | 11.129 | 0      |
| GABRA5    | 1.515  | 0      |
| GABRA6    | 1.73   | 0      |
| GABRB1    | 1.925  | 0      |
| GABRB2    | 1.974  | 0      |
| GABRB3    | 6.131  | 10.07  |
| GABRD     | 1.848  | 1.01   |
| GABRE     | 4.766  | 0.04   |
| GABRG1    | 6.769  | 0      |
| GABRG2    | 5.103  | 0      |
| GABRG3    | 0.93   | 0      |
| GABRP     | 3.268  | 0      |
| GABRQ     | 2      | 0      |
| GABRR1    | 1.976  | 0      |



|              |        |        |
|--------------|--------|--------|
| GABRR2       | 1.613  | 0      |
| GAD1         | 4.03   | 0.25   |
| GAD2         | 2.462  | 0.04   |
| GADD45A      | 1.355  | 112.37 |
| GADD45B      | 1.363  | 40.5   |
| GADD45G      | 1.065  | 2.51   |
| GADD45GIP1   | 0.743  | 28.5   |
| GADL1        | 3.084  | 0      |
| GAGE1        | 0.639  | 0      |
| GAGE10       | 0.396  | 0      |
| GAGE12B      | 0.627  | 0      |
| GAGE12D      | 0.627  | 0      |
| GAGE12G      | 0.627  | 0      |
| GAGE2        | 0.528  | 0      |
| GAGE4        | 0.527  | 0      |
| GAGE5        | 0.522  | 0      |
| GAGE6        | 0.526  | 0      |
| GAGE7        | 0.498  | 0      |
| GAGE7B       | 0.502  | 0      |
| GAGE8        | 0.517  | 0      |
| GAK          | 5.315  | 18.28  |
| GAL          | 0.778  | 0      |
| GAL3ST1      | 1.791  | 0      |
| GAL3ST2      | 1.583  | 0.37   |
| GAL3ST3      | 2.103  | 0      |
| GAL3ST4      | 4.76   | 2.76   |
| GALC         | 4.373  | 1.95   |
| GALE         | 1.724  | 0.86   |
| GALK1        | 1.361  | 3.85   |
| GALK2        | 3.359  | 0.88   |
| GALM         | 1.932  | 0.41   |
| GALNAC4S-6ST | 11.592 | 38.45  |
| GALNACT-2    | 3.724  | 8.34   |
| GALNS        | 2.373  | 1.71   |
| GALNT1       | 3.771  | 8.24   |
| GALNT10      | 5.657  | 0.98   |
| GALNT11      | 5.146  | 0.46   |
| GALNT12      | 1.746  | 0.17   |
| GALNT13      | 5.096  | 0      |
| GALNT14      | 2.712  | 9.63   |
| GALNT17      | 3.922  | 0.03   |
| GALNT2       | 4.961  | 34.33  |
| GALNT3       | 3.871  | 0.52   |
| GALNT4       | 5.347  | 1.13   |
| GALNT5       | 3.131  | 0.06   |
| GALNT6       | 2.881  | 0.11   |
| GALNT7       | 5.049  | 7.58   |
| GALNT8       | 2.135  | 0      |
| GALNT9       | 1.727  | 0      |
| GALNTL1      | 2.907  | 0      |

|          |       |        |
|----------|-------|--------|
| GALNTL2  | 3.578 | 0      |
| GALNTL4  | 2.504 | 0      |
| GALNTL5  | 3.362 | 0.03   |
| GALP     | 0.938 | 0      |
| GALR1    | 3.057 | 0      |
| GALR2    | 1.298 | 0      |
| GALR3    | 1.157 | 0      |
| GALT     | 1.335 | 6.08   |
| GAMT     | 1.482 | 6.61   |
| GAN      | 4.677 | 0.23   |
| GANAB    | 4.91  | 29.46  |
| GANC     | 4.586 | 3.54   |
| GAP43    | 1.225 | 0      |
| GAPDH    | 1.31  | 585.01 |
| GAPDHL16 | 1.277 | 0.23   |
| GAPDHL4  | 1.264 | 1.57   |
| GAPDHP1  | 0.429 | 0.69   |
| GAPDHP2  | 0.993 | 0.5    |
| GAPDHS   | 1.439 | 1.38   |
| GAPVD1   | 6.889 | 11.53  |
| GARNL1   | 9.203 | 1.28   |
| GARNL2P  | 7.159 | 1.21   |
| GARNL3   | 3.348 | 0      |
| GARNL4   | 6.661 | 15.52  |
| GARS     | 5.49  | 6.79   |
| GART     | 4.274 | 1.41   |
| GAS1     | 2.827 | 0.14   |
| GAS2     | 2.236 | 0      |
| GAS2L1   | 4.684 | 0.86   |
| GAS2L2   | 2.709 | 0      |
| GAS2L3   | 2.333 | 0.38   |
| GAS5     | 0.632 | 159.68 |
| GAS6     | 3.179 | 14.84  |
| GAS7     | 8.773 | 15.89  |
| GAS8     | 3.185 | 4.6    |
| GAST     | 0.435 | 0      |
| GATA1    | 1.5   | 0      |
| GATA2    | 3.367 | 0.61   |
| GATA3    | 3.213 | 0.71   |
| GATA4    | 3.372 | 0      |
| GATA5    | 2.595 | 0      |
| GATA6    | 3.494 | 0      |
| GATAD1   | 7.91  | 1.95   |
| GATAD2A  | 3.437 | 21.19  |
| GATAD2B  | 6.292 | 29.96  |
| GATM     | 2.325 | 0      |
| GATS     | 7.214 | 12.44  |
| GBA      | 2.888 | 3.05   |
| GBA2     | 3.611 | 3.95   |
| GBA3     | 2.105 | 0      |

|         |        |       |
|---------|--------|-------|
| GBAP    | 4.648  | 0.77  |
| GBAS    | 3.948  | 5.16  |
| GBE1    | 2.89   | 4.04  |
| GBF1    | 6.376  | 6.99  |
| GBGT1   | 1.949  | 2.69  |
| GBL     | 1.64   | 6.75  |
| GBP1    | 2.88   | 2.78  |
| GBP2    | 2.595  | 22.15 |
| GBP3    | 2.931  | 2.43  |
| GBP4    | 5.449  | 29.16 |
| GBP5    | 2.792  | 11.48 |
| GBP6    | 2.987  | 0.2   |
| GBP7    | 2.418  | 0.45  |
| GBX2    | 1.335  | 0     |
| GC      | 1.781  | 0     |
| GCA     | 1.639  | 5.73  |
| GCA1    | 1.459  | 0.41  |
| GCA2    | 1.425  | 0.14  |
| GCC1    | 8.264  | 3.94  |
| GCC2    | 7.356  | 3.09  |
| GCDH    | 2.092  | 3.69  |
| GCET2   | 3.721  | 3.99  |
| GCG     | 1.128  | 0     |
| GCGR    | 2.044  | 0     |
| GCH1    | 5.13   | 0.79  |
| GCHFR   | 0.713  | 4.3   |
| GCK     | 6.61   | 0     |
| GCKR    | 2.189  | 0     |
| GCLC    | 3.717  | 0.91  |
| GCLM    | 3.074  | 0.93  |
| GCM1    | 2.765  | 0     |
| GCM2    | 2.357  | 0     |
| GCN1L1  | 8.668  | 9.15  |
| GCN5L2  | 3.247  | 17.77 |
| GCNT1   | 5.518  | 0.52  |
| GCNT2   | 7.186  | 0.32  |
| GCNT3   | 2.118  | 0     |
| GCNT4   | 3.436  | 0.03  |
| Gcom1   | 16.567 | 0.55  |
| GCS1    | 2.852  | 13.25 |
| GCSH    | 1.161  | 0     |
| GDA     | 5.43   | 0     |
| GDAP1   | 1.077  | 0.36  |
| GDAP1L1 | 2.244  | 0     |
| GDAP2   | 2.851  | 0.62  |
| GDF1    | 1.164  | 0     |
| GDF10   | 2.674  | 0     |
| GDF11   | 1.962  | 6.91  |
| GDF15   | 1.183  | 0     |
| GDF2    | 1.936  | 0     |

|           |       |        |
|-----------|-------|--------|
| GDF3      | 1.224 | 0      |
| GDF5      | 2.383 | 0      |
| GDF6      | 3.701 | 0      |
| GDF7      | 1.994 | 0      |
| GDF8      | 2.819 | 0      |
| GDF9      | 1.365 | 0.21   |
| GDI1      | 2.917 | 42.36  |
| GDI2      | 2.273 | 116.26 |
| GDI2P     | 4.547 | 2.14   |
| GDNF      | 1.416 | 0      |
| GDPD1     | 1.821 | 0.16   |
| GDPD2     | 2.166 | 0.04   |
| GDPD3     | 1.703 | 0.87   |
| GDPD4     | 2.533 | 0.08   |
| GDPD5     | 3.441 | 0.86   |
| GEFT      | 2.972 | 0      |
| GEM       | 2.322 | 0      |
| GEMIN4    | 3.446 | 1.4    |
| GEMIN5    | 4.527 | 0.59   |
| GEMIN6    | 0.693 | 1      |
| GEMIN7    | 1.848 | 10.76  |
| GEMIN8    | 1.682 | 6.35   |
| GENX-3414 | 2.331 | 0.72   |
| GFAP      | 3.035 | 0      |
| GFER      | 2.409 | 3.98   |
| GF11      | 2.784 | 8.18   |
| GF11B     | 1.789 | 0.11   |
| GFM1      | 3.468 | 5.05   |
| GFM2      | 3.41  | 5.25   |
| GFOD1     | 5.515 | 16.26  |
| GFOD2     | 2.016 | 9.67   |
| GFPT1     | 3.082 | 3.5    |
| GFPT2     | 3.011 | 0      |
| GFRA1     | 3.155 | 0      |
| GFRA2     | 2.216 | 0      |
| GFRA3     | 1.931 | 0      |
| GFRA4     | 2.108 | 0      |
| GFRAL     | 1.911 | 0      |
| GGA1      | 4.356 | 5.24   |
| GGA2      | 6.211 | 49.19  |
| GGA3      | 3.846 | 14.04  |
| GGCX      | 3.159 | 1.28   |
| GGH       | 1.269 | 3.51   |
| GGN       | 2.154 | 0.19   |
| GGPS1     | 3.734 | 1.62   |
| GGT1      | 2.695 | 0.22   |
| GGT2      | 2.935 | 0      |
| GGT3      | 2.066 | 0      |
| GGT6      | 2.527 | 0      |
| GGTA1     | 0.693 | 0      |

|         |       |       |
|---------|-------|-------|
| GGTA1P  | 1.124 | 0     |
| GGTL3   | 2.772 | 1.82  |
| GGTL4   | 1.216 | 0.08  |
| GGTLA1  | 2.405 | 7.4   |
| GGTLA4  | 1.412 | 0     |
| GH1     | 1.201 | 3.05  |
| GH2     | 2.087 | 0.24  |
| GHDC    | 2.65  | 2.5   |
| GHITM   | 2.376 | 34.94 |
| GHR     | 4.36  | 1.64  |
| GHRH    | 0.454 | 0     |
| GHRHR   | 3.602 | 0     |
| GHRL    | 0.518 | 0.95  |
| GHSR    | 1.971 | 0     |
| GIF     | 1.513 | 0     |
| GIMAP1  | 2.496 | 3.64  |
| GIMAP2  | 2.886 | 9.91  |
| GIMAP3P | 1.778 | 0.17  |
| GIMAP4  | 3.93  | 11.66 |
| GIMAP5  | 3.945 | 10.28 |
| GIMAP6  | 8.127 | 7.02  |
| GIMAP7  | 2.458 | 3.22  |
| GIMAP8  | 7.886 | 0.59  |
| GINS1   | 1.831 | 0.32  |
| GINS2   | 1.172 | 1.77  |
| GINS3   | 2.149 | 8.93  |
| GINS4   | 1.166 | 0.6   |
| GIP     | 0.711 | 0     |
| GIPC1   | 2.115 | 6.45  |
| GIPC2   | 2.823 | 0     |
| GIPC3   | 1.212 | 2.53  |
| GIPR    | 2.024 | 0     |
| GIT1    | 3.726 | 11.26 |
| GIT2    | 6.415 | 11.58 |
| GIYD1   | 1.112 | 6.58  |
| GIYD2   | 1.112 | 6.58  |
| GJA1    | 3.086 | 0.07  |
| GJA10   | 2.313 | 0     |
| GJA12   | 2.243 | 0.49  |
| GJA1P1  | 3.072 | 0.07  |
| GJA3    | 1.308 | 0.08  |
| GJA4    | 1.622 | 0     |
| GJA5    | 2.653 | 0     |
| GJA7    | 1.889 | 0.31  |
| GJA8    | 1.374 | 0     |
| GJA9    | 0.966 | 0     |
| GJB1    | 1.613 | 0     |
| GJB2    | 2.25  | 0.44  |
| GJB3    | 3.141 | 0     |
| GJB4    | 1.151 | 0     |

|          |        |       |
|----------|--------|-------|
| GJB5     | 1.281  | 0.08  |
| GJB6     | 1.767  | 0.28  |
| GJB7     | 2.279  | 0.52  |
| GJC1     | 2.094  | 0.85  |
| GJE1     | 1.68   | 0.65  |
| GK       | 3.574  | 0.08  |
| GK2      | 1.866  | 0     |
| GK3P     | 0.974  | 0.41  |
| GK4P     | 2.138  | 0.18  |
| GK5      | 10.085 | 1.21  |
| GK6P     | 1.803  | 0.27  |
| GKAP1    | 1.778  | 1.5   |
| GKN1     | 0.82   | 0     |
| GKN2     | 0.8    | 0.5   |
| GLA      | 1.35   | 8.72  |
| GLB1     | 2.392  | 5.13  |
| GLB1L    | 2.505  | 0.2   |
| GLB1L3   | 2.706  | 8.16  |
| GLCCI1   | 6.014  | 1.04  |
| GLCE     | 5.043  | 0.16  |
| GLDC     | 3.764  | 0.68  |
| GLDCP    | 3.766  | 0.24  |
| GLDN     | 4.595  | 0     |
| GLE1L    | 3.604  | 15.26 |
| GLG1     | 4.747  | 18.69 |
| GLI1     | 3.6    | 0.11  |
| GLI2     | 6.549  | 0.09  |
| GLI3     | 10.108 | 0.33  |
| GLI4     | 1.343  | 5.01  |
| GLIPR1   | 1.061  | 2.99  |
| GLIPR1L1 | 0.962  | 0.41  |
| GLIPR1L2 | 1.729  | 0     |
| GLIS1    | 2.816  | 0.04  |
| GLIS2    | 1.909  | 0.05  |
| GLIS3    | 3.118  | 0.04  |
| GLMN     | 2.032  | 0.49  |
| GLO1     | 1.993  | 19.16 |
| GLOXD1   | 1.803  | 1.04  |
| GLP1R    | 3.063  | 0     |
| GLP2R    | 1.662  | 0     |
| GLRA1    | 1.709  | 0     |
| GLRA2    | 3.216  | 0     |
| GLRA3    | 2.538  | 0     |
| GLRB     | 2.609  | 0     |
| GLRX     | 1.786  | 16.23 |
| GLRX2    | 1.446  | 0.68  |
| GLRX5    | 1.171  | 17.07 |
| GLRXP    | 0.334  | 1.18  |
| GLRXP2   | 1.5    | 0     |
| GLS      | 5.504  | 6.85  |

|         |        |        |
|---------|--------|--------|
| GLS2    | 2.623  | 0.6    |
| GLT1D1  | 2.721  | 0.87   |
| GLT25D1 | 3.593  | 13.16  |
| GLT25D2 | 5.182  | 0.19   |
| GLT6D1  | 1.526  | 0      |
| GLT8D1  | 2.427  | 5.14   |
| GLT8D2  | 1.877  | 0.9    |
| GLT8D3  | 7.493  | 1.01   |
| GLTP    | 2.356  | 7.4    |
| GLTSCR1 | 5.699  | 3.94   |
| GLTSCR2 | 1.499  | 587.35 |
| GLUD1   | 3.039  | 12.54  |
| GLUD2   | 2.335  | 6.23   |
| GLUDP2  | 0.398  | 0.25   |
| GLUDP3  | 6.136  | 2.95   |
| GLUDP4  | 2.089  | 0      |
| GLUL    | 3.898  | 30.94  |
| GLULD1  | 1.934  | 0      |
| GLULL1  | 2.105  | 1.64   |
| GLULP   | 1.116  | 1.24   |
| GLYAT   | 2.729  | 0      |
| GLYATL1 | 2.068  | 0      |
| GLYATL2 | 1.636  | 0      |
| GLYCAM1 | 3.057  | 0      |
| GLYCTK  | 1.982  | 4.1    |
| GM2A    | 2.511  | 3.55   |
| GM2AP   | 0.563  | 0.18   |
| GM632   | 5.919  | 10.33  |
| GMCL1   | 2.346  | 1.02   |
| GMCL1L  | 2.925  | 0.27   |
| GMDS    | 1.672  | 4.74   |
| GMEB1   | 2.183  | 2.22   |
| GMEB2   | 6.02   | 29.25  |
| GMFB    | 4.125  | 7.48   |
| GMFG    | 0.551  | 200.39 |
| GMIP    | 3.517  | 9.93   |
| GML     | 0.723  | 0      |
| GMNN    | 1.839  | 8.34   |
| GMPPA   | 1.885  | 3.41   |
| GMPPB   | 1.957  | 3.99   |
| GMPR    | 1.515  | 0.26   |
| GMPR2   | 2.824  | 10.54  |
| GMPS    | 2.457  | 9.86   |
| GNA11   | 1.475  | 8.92   |
| GNA12   | 11.224 | 33.25  |
| GNA13   | 4.972  | 36.27  |
| GNA14   | 1.929  | 0      |
| GNA15   | 2.673  | 36.38  |
| GNAI1   | 6.64   | 5.56   |
| GNAI2   | 2.2    | 80.67  |

|         |        |         |
|---------|--------|---------|
| GNAI3   | 3.138  | 10.03   |
| GNAL    | 3.737  | 0.79    |
| GNAO1   | 2.571  | 0       |
| GNAQ    | 3.096  | 10.93   |
| GNAQP   | 1.435  | 1.31    |
| GNAS    | 17.643 | 90.66   |
| GNAT1   | 2.534  | 0       |
| GNAT2   | 1.51   | 0.06    |
| GNAT3   | 2.131  | 0       |
| GNAZ    | 3.211  | 0.21    |
| GNB1    | 4.726  | 75.03   |
| GNB1L   | 1.515  | 1.24    |
| GNB2    | 3.421  | 36.12   |
| GNB2L1  | 1.109  | 2037.71 |
| GNB3    | 1.923  | 0.36    |
| GNB4    | 3.302  | 8.63    |
| GNB5    | 3.17   | 2.65    |
| GNE     | 3.745  | 2.77    |
| GNG10   | 1.245  | 4.13    |
| GNG11   | 1.908  | 0.31    |
| GNG12   | 4.289  | 2.7     |
| GNG13   | 0.95   | 0.11    |
| GNG2    | 3.419  | 9.72    |
| GNG3    | 0.882  | 0.34    |
| GNG4    | 1.721  | 0       |
| GNG5    | 0.701  | 19.06   |
| GNG5ps  | 0.427  | 6.02    |
| GNG7    | 4.936  | 26.68   |
| GNG8    | 0.213  | 0       |
| GNGT1   | 1.256  | 0       |
| GNGT2   | 1.039  | 0.48    |
| GNL1    | 9.021  | 0.08    |
| GNL2    | 2.308  | 6.82    |
| GNL3    | 2.523  | 12.24   |
| GNL3L   | 6.826  | 3.77    |
| GPLY    | 1.21   | 14.23   |
| GNMT    | 1.068  | 0.56    |
| GNPAT   | 2.439  | 4.1     |
| GNPDA1  | 2.267  | 0.48    |
| GNPDA2  | 1.918  | 1.4     |
| GNPNAT1 | 3.925  | 0.45    |
| GNPTAB  | 8.724  | 43.13   |
| GNPTG   | 1.856  | 22.34   |
| GNRH1   | 1.511  | 0.26    |
| GNRH2   | 0.694  | 0       |
| GNRHR   | 9.285  | 0.02    |
| GNRHR2  | 6.257  | 1.25    |
| GNS     | 5.114  | 2.38    |
| GOLGA   | 3.177  | 0       |
| GOLGA1  | 4.798  | 3.14    |



|           |       |       |
|-----------|-------|-------|
| GOLGA2    | 4.26  | 3.48  |
| GOLGA2L1  | 2.266 | 1.26  |
| GOLGA2LY1 | 1.061 | 0     |
| GOLGA2LY2 | 5.926 | 0     |
| GOLGA3    | 9.252 | 4.07  |
| GOLGA4    | 7.702 | 5.33  |
| GOLGA5    | 2.891 | 1.71  |
| GOLGA6    | 3.176 | 0     |
| GOLGA7    | 2.105 | 7.43  |
| GOLGA8A   | 5.229 | 14.44 |
| GOLGA8B   | 4.044 | 23.71 |
| GOLGA8E   | 5.24  | 0     |
| GOLGA8G   | 5.256 | 0     |
| GOLGB1    | 11.09 | 12.23 |
| GOLPH2    | 3.224 | 1.35  |
| GOLPH3    | 2.676 | 20.34 |
| GOLPH3L   | 3.127 | 1.04  |
| GOLPH4    | 3.513 | 0.26  |
| GOLT1A    | 0.883 | 0     |
| GOLT1B    | 2.924 | 4.27  |
| GON4L     | 9.563 | 7.91  |
| GOPC      | 4.604 | 4.32  |
| GORASP1   | 3.263 | 19.34 |
| GORASP2   | 2.499 | 18.53 |
| GOSR1     | 5.497 | 2.93  |
| GOSR2     | 6.049 | 1.72  |
| GOT1      | 1.942 | 2.14  |
| GOT1L1    | 1.377 | 0     |
| GOT2      | 2.447 | 36.55 |
| GP1BA     | 2.424 | 0.98  |
| GP1BB     | 0.958 | 0.11  |
| GP2       | 2.431 | 0     |
| GP5       | 5.223 | 0.08  |
| GP6       | 2.264 | 0.3   |
| GP9       | 0.854 | 0.23  |
| GPA33     | 2.793 | 0.07  |
| GPAA1     | 2.067 | 13.74 |
| GPAA1P1   | 1.02  | 3.2   |
| GPAM      | 6.368 | 0.65  |
| GPATCH1   | 3.362 | 1.26  |
| GPATCH2   | 2.336 | 4.15  |
| GPATCH3   | 2.123 | 10.07 |
| GPATCH4   | 2.1   | 2.17  |
| GPATCH8   | 6.86  | 23.58 |
| GPBAR1    | 1.367 | 0.21  |
| GPBP1     | 3.086 | 28.85 |
| GPBP1L1   | 4.649 | 21.45 |
| GPC1      | 3.686 | 0.29  |
| GPC2      | 5.064 | 1.97  |
| GPC3      | 2.312 | 0     |

|         |       |       |
|---------|-------|-------|
| GPC4    | 3.714 | 0.16  |
| GPC5    | 2.889 | 0     |
| GPC6    | 2.759 | 0.28  |
| GPD1    | 2.877 | 0.41  |
| GPD1L   | 3.915 | 1.21  |
| GPD2    | 2.794 | 0.71  |
| GPHA2   | 0.747 | 0     |
| GPHB5   | 0.392 | 0     |
| GPHN    | 4.302 | 0.94  |
| GPI     | 2.321 | 26.56 |
| GPIAP1  | 6.925 | 17.79 |
| GPKOW   | 1.652 | 5.27  |
| GPLD1   | 4.138 | 0.04  |
| GPM6A   | 4.009 | 0     |
| GPM6B   | 4.093 | 0.27  |
| GPNMB   | 5.73  | 0.26  |
| GPR1    | 2.075 | 0     |
| GPR101  | 1.527 | 0     |
| GPR103  | 1.296 | 0     |
| GPR107  | 6.878 | 6.75  |
| GPR108  | 2.405 | 5.39  |
| GPR109A | 2.065 | 1.11  |
| GPR109B | 2.042 | 1.45  |
| GPR110  | 9.504 | 46.32 |
| GPR111  | 2.521 | 0     |
| GPR112  | 9.931 | 0.02  |
| GPR113  | 3.24  | 0.3   |
| GPR114  | 3.761 | 0.58  |
| GPR115  | 2.574 | 0     |
| GPR116  | 5.502 | 0     |
| GPR119  | 1.008 | 0     |
| GPR12   | 1.005 | 2.46  |
| GPR120  | 1.19  | 0     |
| GPR123  | 3.84  | 0     |
| GPR124  | 5.649 | 1.21  |
| GPR125  | 4.56  | 5.27  |
| GPR126  | 9.845 | 0.03  |
| GPR128  | 3.07  | 0     |
| GPR132  | 7.358 | 33.27 |
| GPR133  | 2.824 | 0.07  |
| GPR135  | 2.542 | 0.12  |
| GPR137  | 1.688 | 4.28  |
| GPR137B | 1.997 | 0.44  |
| GPR137C | 4.79  | 0.12  |
| GPR139  | 1.238 | 0     |
| GPR141  | 1.836 | 0     |
| GPR142  | 1.389 | 0     |
| GPR143  | 1.607 | 0     |
| GPR143P | 6.108 | 0     |
| GPR144  | 2.892 | 0     |

|         |       |       |
|---------|-------|-------|
| GPR146  | 3.514 | 11.57 |
| GPR148  | 1.187 | 0     |
| GPR149  | 2.323 | 0     |
| GPR15   | 1.083 | 0.19  |
| GPR150  | 1.305 | 0.38  |
| GPR151  | 1.26  | 0     |
| GPR152  | 1.429 | 0.35  |
| GPR153  | 2.632 | 0.27  |
| GPR155  | 7.473 | 0.37  |
| GPR156  | 2.445 | 0.08  |
| GPR157  | 1.153 | 0     |
| GPR158  | 6.663 | 0     |
| GPR160  | 2.473 | 7.8   |
| GPR161  | 2.958 | 0     |
| GPR162  | 2.812 | 0.52  |
| GPR165P | 0.712 | 0     |
| GPR166P | 0.702 | 0     |
| GPR17   | 2.062 | 0     |
| GPR171  | 1.786 | 0.55  |
| GPR172A | 1.937 | 1.17  |
| GPR172B | 2.294 | 0     |
| GPR173  | 1.698 | 0.93  |
| GPR174  | 1.258 | 0.08  |
| GPR175  | 1.861 | 3.3   |
| GPR176  | 5.352 | 102.8 |
| GPR177  | 3.32  | 0.09  |
| GPR179  | 7.98  | 0     |
| GPR18   | 1.603 | 2.35  |
| GPR180  | 3.922 | 0.12  |
| GPR19   | 1.409 | 0.07  |
| GPR20   | 1.528 | 0     |
| GPR21   | 1.05  | 0.76  |
| GPR22   | 5.932 | 0     |
| GPR23   | 2.293 | 0     |
| GPR25   | 1.086 | 0     |
| GPR26   | 7.514 | 0     |
| GPR27   | 1.128 | 0.18  |
| GPR3    | 2.111 | 0.52  |
| GPR30   | 5.942 | 0.08  |
| GPR31   | 0.96  | 0     |
| GPR32   | 1.071 | 0.09  |
| GPR32P  | 1.611 | 0     |
| GPR33   | 1.055 | 0     |
| GPR34   | 4.442 | 0     |
| GPR35   | 1.875 | 2.06  |
| GPR37   | 5.916 | 0     |
| GPR37L1 | 2.459 | 0     |
| GPR39   | 1.362 | 0     |
| GPR4    | 2.693 | 0     |
| GPR42   | 1.041 | 0.1   |

|         |        |       |
|---------|--------|-------|
| GPR44   | 2.901  | 0.04  |
| GPR45   | 1.725  | 0     |
| GPR50   | 1.951  | 0     |
| GPR52   | 1.472  | 0.34  |
| GPR53P  | 3.774  | 0     |
| GPR55   | 2.527  | 0     |
| GPR56   | 5.98   | 8.95  |
| GPR6    | 1.626  | 0     |
| GPR61   | 2.462  | 0     |
| GPR62   | 2.124  | 0     |
| GPR63   | 1.891  | 0.11  |
| GPR64   | 4.641  | 0.02  |
| GPR65   | 1.754  | 1.08  |
| GPR68   | 2.814  | 0.45  |
| GPR75   | 2.057  | 0.86  |
| GPR77   | 1.287  | 0.31  |
| GPR78   | 1.941  | 0     |
| GPR79   | 1.018  | 0     |
| GPR81   | 2.977  | 3.53  |
| GPR82   | 1.41   | 0     |
| GPR83   | 4.109  | 0.04  |
| GPR84   | 1.497  | 0.27  |
| GPR85   | 9.764  | 0     |
| GPR87   | 1.498  | 0.06  |
| GPR88   | 3.488  | 0     |
| GPR89A  | 1.928  | 0.66  |
| GPR92   | 2.845  | 2.47  |
| GPR97   | 2.656  | 3.32  |
| GPR98   | 19.333 | 0     |
| GPRASP1 | 4.705  | 2     |
| GPRASP2 | 3.572  | 0.95  |
| GPRC5A  | 2.851  | 0.14  |
| GPRC5B  | 2.845  | 0.56  |
| GPRC5C  | 2.434  | 13.7  |
| GPRC5D  | 1.038  | 0     |
| GPRC6A  | 2.86   | 0     |
| GPRIN1  | 4.208  | 0.66  |
| GPRIN2  | 1.823  | 0     |
| GPRIN3  | 10.165 | 37.37 |
| GPS1    | 2.738  | 14.96 |
| GPS2    | 1.157  | 23.26 |
| GPSM1   | 1.959  | 1.87  |
| GPSM2   | 2.788  | 1.17  |
| GPSM3   | 4.368  | 0.45  |
| GPSN2   | 1.163  | 21.27 |
| GPT     | 1.922  | 0.52  |
| GPT2    | 3.955  | 0.05  |
| GPX1    | 2.007  | 96.22 |
| GPX2    | 0.994  | 0.1   |
| GPX3    | 1.761  | 1.69  |

|         |        |       |
|---------|--------|-------|
| GPX4    | 1.528  | 70.96 |
| GPX5    | 0.768  | 0     |
| GPX6    | 1.712  | 0     |
| GPX7    | 1.227  | 9.43  |
| GPXP2   | 0.94   | 1.05  |
| GRAMD1A | 2.64   | 36.12 |
| GRAMD1C | 3.912  | 4.99  |
| GRAMD2  | 3.281  | 0     |
| GRAMD3  | 2.905  | 0.95  |
| GRAP    | 3.669  | 51.56 |
| GRAP2   | 1.552  | 0.2   |
| GRASP   | 4.322  | 54.14 |
| GRB10   | 11.886 | 7.6   |
| GRB14   | 2.387  | 0     |
| GRB2    | 3.468  | 21.14 |
| GRB7    | 3.417  | 26.43 |
| GREB1   | 10.498 | 0     |
| GREM1   | 4.134  | 2.9   |
| GREM2   | 4.183  | 0     |
| GRHL1   | 3.84   | 0     |
| GRHL2   | 4.778  | 0     |
| GRHL3   | 3.302  | 0     |
| GRHPR   | 1.235  | 8.01  |
| GRIA1   | 3.24   | 0     |
| GRIA2   | 5.644  | 0     |
| GRIA3   | 3.692  | 0     |
| GRIA4   | 2.709  | 0     |
| GRID1   | 5.849  | 0     |
| GRID2   | 3.024  | 0     |
| GRID2IP | 57.639 | 0.2   |
| GRIK1   | 3.684  | 0.03  |
| GRIK2   | 3.969  | 0     |
| GRIK3   | 3.733  | 0     |
| GRIK4   | 2.871  | 0     |
| GRIK5   | 3.528  | 12.93 |
| GRIN1   | 7.351  | 0     |
| GRIN2A  | 6.289  | 0.19  |
| GRIN2B  | 6.237  | 0     |
| GRIN2C  | 4.268  | 1     |
| GRIN2D  | 4.298  | 0     |
| GRIN3A  | 7.77   | 0.05  |
| GRIN3B  | 3.254  | 0.24  |
| GRINA   | 2.11   | 18.19 |
| GRINL1A | 5.207  | 4.66  |
| GRIP1   | 4.617  | 0     |
| GRIP2   | 3.426  | 0     |
| GRIPAP1 | 5.487  | 17.4  |
| GRK1    | 1.096  | 0     |
| GRK4    | 2.314  | 0.73  |
| GRK5    | 3.484  | 19.14 |

|         |       |        |
|---------|-------|--------|
| GRK6    | 4.115 | 7.36   |
| GRK6PS  | 2.417 | 1.47   |
| GRK7    | 1.746 | 0.05   |
| GRLF1   | 8.244 | 2.74   |
| GRM1    | 6.622 | 0.04   |
| GRM2    | 3.156 | 1.44   |
| GRM3    | 8.52  | 0.01   |
| GRM4    | 3.879 | 0      |
| GRM5    | 4.475 | 0      |
| GRM6    | 6.139 | 0      |
| GRM7    | 5.625 | 0      |
| GRM8    | 6.59  | 0      |
| GRN     | 2.551 | 27.34  |
| GRP     | 1.484 | 0      |
| GRPEL1  | 1.504 | 3.35   |
| GRPEL2  | 4.105 | 2.15   |
| GRPR    | 2.681 | 0      |
| GRRP1   | 1.523 | 0      |
| GRSF1   | 2.839 | 8.29   |
| G RTP1  | 1.492 | 0.2    |
| GRWD1   | 2.414 | 3.44   |
| GSC     | 1.189 | 0      |
| G SCL   | 0.618 | 0      |
| GSDM1   | 2.164 | 0      |
| GSDMDC1 | 2.027 | 25.23  |
| GSDML   | 1.626 | 6.57   |
| GSG1    | 3.134 | 0      |
| GSG1L   | 1.172 | 0      |
| GSG2    | 2.797 | 0.85   |
| GSH1    | 0.847 | 0      |
| GSH2    | 1.262 | 0      |
| GSK3A   | 2.179 | 7.67   |
| GSK3B   | 1.626 | 4.57   |
| GSN     | 3.065 | 157.85 |
| GSPT1   | 4.171 | 63.83  |
| GSPT2   | 2.503 | 7.51   |
| GSR     | 2.262 | 6.47   |
| GSS     | 1.9   | 9.47   |
| GSTA1   | 1.042 | 0      |
| GSTA2   | 0.976 | 0      |
| GSTA3   | 0.908 | 0      |
| GSTA4   | 1.298 | 1.68   |
| GSTA5   | 0.845 | 0      |
| GSTAP1  | 0.75  | 0      |
| GSTCD   | 3.118 | 0.44   |
| GSTK1   | 2     | 20.34  |
| GSTM1   | 1.161 | 9.63   |
| GSTM2   | 1.402 | 17.15  |
| GSTM3   | 3.948 | 0.2    |
| GSTM3P  | 0.574 | 0      |

|           |         |        |
|-----------|---------|--------|
| GSTM4     | 1.905   | 1.15   |
| GSTM5     | 1.567   | 0.06   |
| GSTO1     | 0.785   | 22.31  |
| GSTO2     | 1.494   | 0      |
| GSTO3P1   | 0.79    | 2.63   |
| GSTP1     | 0.942   | 104.71 |
| GSTPP     | 0.412   | 0      |
| GSTT1     | 1.005   | 5.02   |
| GSTT2     | 1.101   | 0      |
| GSTZ1     | 1.679   | 2.65   |
| GTDC1     | 3.828   | 0.77   |
| GTF2A1    | 1.922   | 0.83   |
| GTF2A2    | 0.735   | 14.54  |
| GTF2B     | 1.304   | 28.38  |
| GTF2E1    | 2.955   | 1.78   |
| GTF2E2    | 1.53    | 5.17   |
| GTF2F1    | 2.443   | 29.65  |
| GTF2F2    | 1.41    | 11.08  |
| GTF2F2L   | 1.122   | 0.18   |
| GTF2H1    | 3.175   | 1.34   |
| GTF2H2    | 3.872   | 0      |
| GTF2H3    | 1.505   | 2.56   |
| GTF2H4    | 5.148   | 0      |
| GTF2H5    | 0.449   | 2.2    |
| GTF2I     | 9.058   | 1.56   |
| GTF2IP1   | 111.876 | 0.13   |
| GTF2IRD1  | 7.114   | 0.5    |
| GTF2IRD2  | 7.102   | 0.53   |
| GTF2IRD2B | 7.17    | 1.01   |
| GTF2IRD2P | 63.534  | 0.07   |
| GTF3C1    | 6.995   | 7.48   |
| GTF3C2    | 3.92    | 8.75   |
| GTF3C3    | 2.938   | 9.6    |
| GTF3C4    | 3.209   | 2.35   |
| GTF3C5    | 2.366   | 31.28  |
| GTPBP1    | 5.428   | 33.74  |
| GTPBP10   | 4.272   | 1.78   |
| GTPBP2    | 2.979   | 6.24   |
| GTPBP3    | 3.228   | 3.49   |
| GTPBP4    | 2.517   | 15.37  |
| GTPBP5    | 3.085   | 2.72   |
| GTPBP6    | 1.18    | 15.76  |
| GTPBP8    | 1.982   | 0.9    |
| GTPBP9    | 4.532   | 6.37   |
| GTSCR1    | 0.402   | 0      |
| GTSE1     | 4.478   | 0.53   |
| GUCA1A    | 1.874   | 0      |
| GUCA1B    | 2.27    | 0.78   |
| GUCA1C    | 0.86    | 0      |
| GUCA2A    | 0.575   | 0      |

|         |        |        |
|---------|--------|--------|
| GUCA2B  | 0.597  | 0      |
| GUCY1A2 | 2.954  | 0      |
| GUCY1A3 | 2.992  | 1.85   |
| GUCY1B2 | 2.871  | 0.04   |
| GUCY1B3 | 2.443  | 0.12   |
| GUCY2C  | 3.744  | 0      |
| GUCY2D  | 3.622  | 0      |
| GUCY2E  | 2.779  | 0      |
| GUCY2F  | 3.698  | 0      |
| GUF1    | 2.671  | 1.89   |
| GUK1    | 4.322  | 38.78  |
| GULOP   | 0.107  | 0      |
| GULP1   | 3.451  | 0      |
| GUSB    | 4.382  | 23.57  |
| GUSBL1  | 0.979  | 0      |
| GUSBL2  | 2.624  | 0.9    |
| GUSBP1  | 7.169  | 0      |
| GVIN1   | 8.82   | 0.12   |
| GYG1    | 1.805  | 53.99  |
| GYG2    | 3.267  | 0      |
| GYG2P   | 14.911 | 0      |
| GYLTL1B | 2.528  | 6.5    |
| GYPA    | 2.6    | 0.04   |
| GYPB    | 0.527  | 0      |
| GYPC    | 1.071  | 566.09 |
| GYPE    | 1.886  | 0      |
| GYS1    | 3.557  | 4.01   |
| GYS2    | 2.905  | 0      |
| GZF1    | 4.741  | 2.09   |
| GZMA    | 0.878  | 3.95   |
| GZMB    | 0.927  | 4.27   |
| GZMH    | 0.902  | 3.4    |
| GZMK    | 1.045  | 0.57   |
| GZMM    | 0.947  | 1.25   |
| H19     | 2.308  | 0.38   |
| H1F0    | 2.33   | 506.91 |
| H1FNT   | 1.3    | 0.08   |
| H1FOO   | 1.067  | 0      |
| H1FX    | 1.503  | 553.27 |
| H2AFB1  | 0.517  | 0      |
| H2AFB2  | 0.348  | 0      |
| H2AFB3  | 0.517  | 0      |
| H2AFJ   | 2.807  | 14.52  |
| H2AFV   | 4.406  | 5.59   |
| H2AFX   | 1.594  | 5.47   |
| H2AFY   | 17.759 | 61.12  |
| H2AFY2  | 1.917  | 0.05   |
| H2AFZ   | 1.126  | 33.74  |
| H2AFZP  | 1.167  | 1.53   |
| H2AFZP2 | 0.851  | 2.21   |



|        |       |         |
|--------|-------|---------|
| H2BFM  | 1.964 | 0       |
| H2BFS  | 0.381 | 1.3     |
| H2BFWT | 0.89  | 0       |
| H3F3A  | 2.223 | 14.29   |
| H3F3B  | 2.705 | 312.98  |
| H6PD   | 9.117 | 2.29    |
| HAAO   | 1.247 | 7.38    |
| HABP2  | 3.009 | 0.1     |
| HABP4  | 2.102 | 12.33   |
| HACE1  | 4.54  | 0.59    |
| HACL1  | 2.03  | 5.22    |
| HADH   | 1.912 | 6.99    |
| HADHA  | 2.927 | 52.19   |
| HADHAP | 2.854 | 5.48    |
| HADHB  | 1.983 | 15.87   |
| HAGH   | 2.266 | 2.19    |
| HAGHL  | 2.555 | 3.02    |
| HAL    | 3.139 | 0.06    |
| HAMP   | 0.427 | 0.23    |
| HAND1  | 1.738 | 0       |
| HAND2  | 2.368 | 0       |
| HAO1   | 1.746 | 0       |
| HAO2   | 1.696 | 0       |
| HAP1   | 4.087 | 0       |
| HAPLN1 | 1.76  | 0       |
| HAPLN2 | 1.771 | 0.22    |
| HAPLN3 | 1.893 | 0.94    |
| HAPLN4 | 3.383 | 0       |
| HARS   | 1.964 | 16.92   |
| HARS2  | 2.49  | 16.89   |
| HAS1   | 2.087 | 0       |
| HAS2   | 3.008 | 0.04    |
| HAS3   | 4.645 | 0.23    |
| HASNT  | 1.656 | 0       |
| HAT1   | 1.828 | 5.25    |
| HAVCR1 | 1.453 | 0       |
| HAVCR2 | 2.32  | 0.43    |
| HAX1   | 1.294 | 13.69   |
| HBA1   | 0.576 | 1860.75 |
| HBA2   | 0.575 | 2367.78 |
| HBAP1  | 0.812 | 0       |
| HBB    | 0.626 | 2146.43 |
| HBBP1  | 2.402 | 0       |
| HBD    | 0.774 | 4.86    |
| HBE1   | 0.816 | 0       |
| HBEGF  | 2.344 | 10.09   |
| HBG1   | 0.584 | 19.14   |
| HBG2   | 0.583 | 37.34   |
| HBM    | 0.51  | 4.46    |
| HBP1   | 7.193 | 27.86   |

|             |       |        |
|-------------|-------|--------|
| HBQ1        | 0.651 | 0.15   |
| HBS1L       | 7.409 | 10.45  |
| HBXIP       | 1.406 | 53.2   |
| HBZ         | 0.589 | 0.34   |
| HBZP        | 2.035 | 0.15   |
| HCCA2       | 1.406 | 13.44  |
| HCCS        | 2.307 | 4.98   |
| HCFC1       | 7.711 | 9.68   |
| HCFC1R1     | 1.133 | 9.43   |
| HCFC2       | 2.583 | 6.59   |
| hCG_15200   | 2.309 | 59.31  |
| hCG_16001   | 0.585 | 2.2    |
| hCG_1640171 | 0.669 | 7.24   |
| hCG_1640785 | 0.5   | 658.53 |
| hCG_1641229 | 1.748 | 13.13  |
| hCG_1641617 | 0.305 | 1.62   |
| hCG_1641703 | 0.699 | 0.57   |
| hCG_1642034 | 0.318 | 0      |
| hCG_1642354 | 0.468 | 1.48   |
| hCG_1642425 | 0.348 | 0      |
| hCG_1642535 | 0.216 | 0      |
| hCG_1642624 | 1.023 | 0.96   |
| hCG_1642947 | 0.387 | 0      |
| hCG_1642987 | 0.267 | 0.37   |
| hCG_1643176 | 0.402 | 0      |
| hCG_1643692 | 0.771 | 0      |
| hCG_1644239 | 0.303 | 0.65   |
| hCG_1644301 | 0.459 | 31.25  |
| hCG_1644323 | 0.471 | 1.05   |
| hCG_1644355 | 0.24  | 0      |
| hCG_1644608 | 1.48  | 0.07   |
| hCG_1644884 | 2.601 | 0      |
| hCG_1645016 | 1.567 | 0      |
| hCG_1645220 | 1.172 | 0      |
| hCG_1645727 | 1.377 | 0      |
| hCG_1646157 | 3.482 | 0.12   |
| hCG_1646420 | 0.69  | 0      |
| hCG_1646471 | 0.549 | 0      |
| hCG_1651160 | 0.585 | 0      |
| hCG_1654703 | 0.652 | 0      |
| hCG_1655019 | 0.381 | 0      |
| hCG_1657112 | 0.665 | 0      |
| hCG_1657980 | 1.213 | 0      |
| hCG_1659830 | 0.297 | 0      |
| hCG_1660138 | 0.849 | 0      |
| hCG_1660379 | 0.456 | 0      |
| hCG_1729902 | 0.698 | 0      |
| hCG_1730474 | 2.139 | 0.09   |
| hCG_1731871 | 0.3   | 0      |
| hCG_1732469 | 1.279 | 0      |

|             |       |        |
|-------------|-------|--------|
| hCG_1740678 | 1.107 | 0      |
| hCG_1749005 | 0.429 | 0.46   |
| hCG_1757335 | 1.283 | 49.28  |
| hCG_1773937 | 0.644 | 20.43  |
| hCG_17750   | 0.384 | 17     |
| hCG_1776018 | 1.053 | 0      |
| hCG_1776047 | 0.523 | 0      |
| hCG_1776980 | 1.212 | 2.04   |
| hCG_1778014 | 2.645 | 1.9    |
| hCG_1778643 | 0.573 | 2.76   |
| hCG_1781062 | 1.499 | 11.62  |
| hCG_1783052 | 4.715 | 3.1    |
| hCG_1783417 | 0.554 | 587.38 |
| hCG_1783907 | 0.657 | 0      |
| hCG_1786283 | 1.69  | 0      |
| hCG_1787519 | 0.745 | 0.4    |
| hCG_1789710 | 0.566 | 0.35   |
| hCG_1789827 | 0.371 | 0.27   |
| hCG_1790262 | 0.381 | 7.53   |
| hCG_1790474 | 0.339 | 6.72   |
| hCG_1790806 | 0.384 | 0.77   |
| hCG_1790950 | 0.354 | 0      |
| hCG_1791193 | 0.207 | 264.79 |
| hCG_1793136 | 0.375 | 0.53   |
| hCG_1793610 | 0.354 | 0      |
| hCG_1793639 | 0.273 | 0      |
| hCG_1794003 | 0.465 | 0      |
| hCG_1794298 | 0.966 | 0.82   |
| hCG_1795065 | 0.717 | 1.52   |
| hCG_1795091 | 0.49  | 0      |
| hCG_1795283 | 0.576 | 0      |
| hCG_17955   | 1.216 | 0.24   |
| hCG_1795560 | 0.165 | 2.4    |
| hCG_1806964 | 3.518 | 0.17   |
| hCG_1811337 | 0.291 | 0      |
| hCG_1813624 | 0.455 | 0      |
| hCG_1813818 | 0.627 | 0      |
| hCG_1814486 | 1.148 | 0.69   |
| hCG_1814936 | 0.607 | 0      |
| hCG_1815491 | 0.558 | 0.36   |
| hCG_1815504 | 0.635 | 0      |
| hCG_1817208 | 0.512 | 0      |
| hCG_1818231 | 0.472 | 0      |
| hCG_1818237 | 0.303 | 0.65   |
| hCG_1820717 | 0.467 | 0      |
| hCG_1820764 | 0.336 | 3.24   |
| hCG_1820801 | 0.559 | 0      |
| hCG_18255   | 0.588 | 0      |
| hCG_18290   | 0.495 | 787.3  |
| hCG_18385   | 0.387 | 3.58   |

|             |       |       |
|-------------|-------|-------|
| hCG_18635   | 0.657 | 0.75  |
| hCG_1979841 | 0.93  | 1.28  |
| hCG_1980447 | 0.756 | 0.13  |
| hCG_1981531 | 1.27  | 0.23  |
| hCG_1981635 | 0.417 | 0     |
| hCG_1982709 | 1.429 | 0.49  |
| hCG_1983058 | 0.779 | 51.18 |
| hCG_1983332 | 0.856 | 25.54 |
| hCG_1983896 | 1.974 | 0.35  |
| hCG_1984265 | 0.47  | 1.05  |
| hCG_1984468 | 1.044 | 1.24  |
| hCG_1985469 | 1.832 | 0.05  |
| hCG_1986447 | 2.625 | 0.94  |
| hCG_1988300 | 3.013 | 0     |
| hCG_1989844 | 0.466 | 0     |
| hCG_1990491 | 1.182 | 0     |
| hCG_1992287 | 0.348 | 0     |
| hCG_1992539 | 1.565 | 6.07  |
| hCG_1994895 | 0.55  | 0     |
| hCG_1995786 | 0.671 | 6.05  |
| hCG_1999814 | 0.807 | 0     |
| hCG_2000329 | 1.027 | 95.09 |
| hCG_2001000 | 1.102 | 1.26  |
| hCG_2003663 | 2.215 | 0     |
| hCG_2003956 | 1.596 | 0.12  |
| hCG_2004593 | 0.664 | 0.3   |
| hCG_20114   | 1.404 | 7.96  |
| hCG_2013212 | 0.492 | 0     |
| hCG_2015956 | 0.89  | 12.78 |
| hCG_2019139 | 0.45  | 0     |
| hCG_2020170 | 0.171 | 0     |
| hCG_2023776 | 2.722 | 0.87  |
| hCG_2024094 | 0.59  | 2.52  |
| hCG_2024410 | 2.398 | 0.29  |
| hCG_2024596 | 0.738 | 0.54  |
| hCG_2025063 | 0.555 | 0.89  |
| hCG_2025128 | 3.541 | 0     |
| hCG_2025798 | 0.593 | 0     |
| hCG_2026038 | 0.902 | 0.88  |
| hCG_2028557 | 1.93  | 3.8   |
| hCG_2029702 | 0.596 | 0.33  |
| hCG_2031213 | 0.531 | 0     |
| hCG_2031635 | 0.303 | 7.84  |
| hCG_2032978 | 0.677 | 0     |
| hCG_2033311 | 0.477 | 0     |
| hCG_2036596 | 1.363 | 0     |
| hCG_2040054 | 0.977 | 0.2   |
| hCG_2040201 | 1.123 | 0     |
| hCG_2040210 | 1.082 | 0.28  |
| hCG_2040224 | 0.531 | 12.11 |

|             |        |         |
|-------------|--------|---------|
| hCG_2040376 | 2.541  | 4.2     |
| hCG_2040572 | 0.519  | 0       |
| hCG_2041321 | 0.363  | 0       |
| hCG_20417   | 2.618  | 0       |
| hCG_2042202 | 1.55   | 0       |
| hCG_20426   | 1.88   | 0.53    |
| hCG_2042779 | 0.609  | 0       |
| hCG_2044152 | 0.509  | 0       |
| hCG_2044975 | 0.459  | 0       |
| hCG_2045048 | 0.56   | 0       |
| hCG_2045437 | 0.635  | 0       |
| hCG_2045614 | 0.766  | 0       |
| hCG_2045751 | 0.635  | 0       |
| hCG_2045804 | 0.454  | 0       |
| hCG_2045828 | 0.455  | 0       |
| hCG_2045830 | 0.705  | 0.56    |
| hCG_2045843 | 0.537  | 0       |
| hCG_21078   | 0.567  | 1638.66 |
| hCG_22804   | 1.379  | 0.43    |
| hCG_23177   | 0.565  | 0       |
| hCG_24006   | 1.983  | 0       |
| hCG_25371   | 0.54   | 36.27   |
| hCG_25653   | 0.653  | 0       |
| hCG_26523   | 0.523  | 149.26  |
| hCG_26824   | 0.965  | 4.31    |
| hCG_27695   | 0.693  | 5       |
| hCG_31916   | 0.8    | 45.76   |
| hCG_32481   | 3.633  | 2.21    |
| hCG_33730   | 74.989 | 0       |
| hCG_38480   | 0.825  | 0       |
| hCG_38941   | 1.892  | 0       |
| hCG_38984   | 1.581  | 0.12    |
| hCG_39912   | 0.636  | 0       |
| hCG_401283  | 1.083  | 0       |
| hCG_41095   | 1.307  | 0.15    |
| HCG12       | 1.3    | 0.76    |
| HCG22       | 0.576  | 0       |
| HCG27       | 5.156  | 0.19    |
| HCG2P6      | 7.093  | 0       |
| HCG2P7      | 3.633  | 0       |
| HCG2P8      | 7.077  | 0       |
| HCG4        | 2.035  | 0.05    |
| HCG4P10     | 2.664  | 0       |
| HCG4P3      | 0.984  | 0       |
| HCG4P4      | 0.429  | 0       |
| HCG4P5      | 0.89   | 0       |
| HCG4P6      | 3.184  | 0.03    |
| HCG4P7      | 0.898  | 0       |
| HCG4P8      | 0.986  | 0       |
| HCG9        | 1.959  | 0       |

|           |         |       |
|-----------|---------|-------|
| HCG9P5    | 0.794   | 0     |
| HCGVIII-2 | 1.28    | 0     |
| HCK       | 2.089   | 0.9   |
| HCLS1     | 1.957   | 30.58 |
| HCN1      | 2.748   | 0     |
| HCN2      | 3.408   | 0     |
| HCN3      | 3.717   | 0.27  |
| HCN4      | 5.065   | 0     |
| HCP5      | 4.866   | 22.51 |
| HCP5P10   | 2.657   | 0     |
| HCP5P12   | 4.68    | 0     |
| HCP5P13   | 1.113   | 0     |
| HCP5P14   | 7.018   | 0.01  |
| HCP5P15   | 2.323   | 0     |
| HCP5P2    | 2.268   | 0     |
| HCP5P3    | 1.3     | 0.46  |
| HCP5P6    | 2.363   | 0     |
| HCP9      | 11.971  | 0     |
| HCRT      | 0.577   | 0.17  |
| HCRTR1    | 1.564   | 0.12  |
| HCRTR2    | 1.818   | 0     |
| HCST      | 0.545   | 13.43 |
| HCTSL-s   | 0.657   | 0     |
| HD        | 14.643  | 7.18  |
| HDAC1     | 2.091   | 12.21 |
| HDAC10    | 2.687   | 12.99 |
| HDAC11    | 1.719   | 2.88  |
| HDAC2     | 1.964   | 11.79 |
| HDAC3     | 1.934   | 7.87  |
| HDAC4     | 8.458   | 0.97  |
| HDAC5     | 6.104   | 28.83 |
| HDAC6     | 4.099   | 11.34 |
| HDAC7A    | 6.114   | 43.04 |
| HDAC8     | 1.714   | 2.08  |
| HDAC9     | 15.461  | 0.35  |
| HDC       | 2.408   | 0.53  |
| HDDC2     | 1.36    | 4.36  |
| HDDC3     | 1.047   | 2.74  |
| HDGF      | 2.377   | 39.09 |
| HDGF2     | 2.422   | 6.83  |
| HDGFL1    | 2.034   | 0.04  |
| HDGFP     | 1.598   | 0.75  |
| HDGFRP3   | 1.973   | 0.76  |
| HDHD1A    | 2.098   | 0.85  |
| HDHD1BP   | 107.418 | 0     |
| HDHD1CP   | 1.847   | 0     |
| HDHD2     | 2.185   | 2.18  |
| HDHD3     | 1.721   | 2.87  |
| HDLBP     | 5.494   | 16.51 |
| HEATR1    | 7.436   | 4.59  |

|          |        |       |
|----------|--------|-------|
| HEATR2   | 6.494  | 1.63  |
| HEATR3   | 2.625  | 0.72  |
| HEATR4   | 3.469  | 0     |
| HEATR5B  | 6.792  | 3.31  |
| HEBP1    | 1.187  | 7.08  |
| HEBP2    | 1.282  | 10.5  |
| HECA     | 5.621  | 49.18 |
| HECTD1   | 8.955  | 13.33 |
| HECTD2   | 6.469  | 1.06  |
| HECTD3   | 3.407  | 6.71  |
| HECW1    | 13.678 | 0.27  |
| HECW2    | 6.926  | 0     |
| HEG1     | 9.213  | 1.43  |
| HEJ1     | 0.945  | 0     |
| HEL308   | 3.559  | 1.33  |
| HELB     | 3.368  | 0.5   |
| HELLS    | 3.099  | 0.96  |
| HELT     | 0.984  | 0     |
| HELZ     | 6.977  | 7.39  |
| HEMGN    | 2.296  | 0.26  |
| HEMK1    | 5.862  | 2.33  |
| HEPACAM  | 3.24   | 0     |
| HEPH     | 4.65   | 0     |
| HEPHL1   | 6.181  | 0     |
| HEPN1    | 1.428  | 0     |
| HERC1    | 16.21  | 13.04 |
| HERC2    | 15.334 | 3.98  |
| HERC2P2  | 102.02 | 0.51  |
| HERC2P4  | 2.428  | 0     |
| HERC2P5  | 34.025 | 0     |
| HERC2P6  | 0.586  | 0     |
| HERC3    | 4.894  | 3.38  |
| HERC4    | 5.878  | 1.18  |
| HERC5    | 3.479  | 1.4   |
| HERC6    | 4.954  | 1.46  |
| HERPUD1  | 2.248  | 8.84  |
| HERPUD2  | 5.736  | 6.21  |
| HERV-FRD | 3.192  | 0.75  |
| HES1     | 1.453  | 0.07  |
| HES2     | 4.258  | 0     |
| HES3     | 1.355  | 0     |
| HES4     | 0.878  | 0.22  |
| HES5     | 1.306  | 0     |
| HES6     | 1.359  | 0.36  |
| HES7     | 0.678  | 0.14  |
| HESX1    | 0.892  | 1     |
| HEXA     | 2.598  | 30.39 |
| HEXB     | 2.284  | 16.76 |
| HEXDC    | 1.903  | 7.07  |
| HEXIM1   | 4.785  | 15.96 |

|         |        |        |
|---------|--------|--------|
| HEXIM2  | 1.33   | 1.41   |
| HEY1    | 2.199  | 0      |
| HEY2    | 2.533  | 0.93   |
| HEYL    | 3.361  | 0.12   |
| HFE     | 3.685  | 0.13   |
| HFE2    | 3.349  | 0      |
| HFM1    | 2.02   | 0      |
| HGD     | 2.837  | 0      |
| HGF     | 9.104  | 0.23   |
| HGFAC   | 2.038  | 0.2    |
| HGS     | 2.911  | 18.73  |
| HGSNAT  | 5.952  | 0.9    |
| HHAT    | 3.594  | 1.02   |
| HHATL   | 1.75   | 0      |
| HHCM    | 1.407  | 0      |
| HHEX    | 3.146  | 38.49  |
| HHIP    | 3.53   | 0.31   |
| HHLA1   | 2.277  | 0      |
| HHLA2   | 2.66   | 1.08   |
| HHLA3   | 1.863  | 0.85   |
| HIAT1   | 2.915  | 17.71  |
| HIATL1  | 3.298  | 8.37   |
| HIATL2  | 68.322 | 0.2    |
| HIBADH  | 3.956  | 0.65   |
| HIBCH   | 2.326  | 0.47   |
| HIC1    | 2.626  | 0.34   |
| HIC2    | 6.794  | 5.12   |
| HIF1A   | 7.182  | 104.35 |
| HIF1AN  | 4.685  | 11.81  |
| HIF3A   | 6.223  | 0.02   |
| HIG2    | 2.698  | 0      |
| HIGD1A  | 1.338  | 7.55   |
| HIGD1B  | 0.626  | 0      |
| HIGD2A  | 0.611  | 71.74  |
| HIGD2BP | 11.485 | 0.03   |
| HILS1   | 0.854  | 0      |
| HIN1L   | 6.813  | 1.6    |
| HINT1   | 0.98   | 105.8  |
| HINT2   | 0.652  | 6.98   |
| HINT3   | 1.487  | 1.26   |
| HIP1    | 14.675 | 1.07   |
| HIP1R   | 4.473  | 20.99  |
| HIP2    | 2.67   | 10.93  |
| HIPK1   | 9.005  | 31.01  |
| HIPK2   | 5.596  | 0.6    |
| HIPK3   | 5.721  | 28.84  |
| HIPK4   | 2.452  | 1.13   |
| HIRA    | 4.013  | 7.62   |
| HIRIP3  | 2.344  | 3.38   |
| HISPPD1 | 5.281  | 5.47   |



|             |       |        |
|-------------|-------|--------|
| HISPPD2A    | 7.708 | 1.72   |
| HIST1H1A    | 0.757 | 0      |
| HIST1H1B    | 0.79  | 0.88   |
| HIST1H1C    | 0.732 | 111.77 |
| HIST1H1D    | 0.777 | 4.45   |
| HIST1H1E    | 0.785 | 7.56   |
| HIST1H1PS2  | 0.735 | 0      |
| HIST1H1T    | 0.725 | 0      |
| HIST1H2AA   | 0.5   | 0      |
| HIST1H2AB   | 0.477 | 0      |
| HIST1H2AC   | 0.794 | 22.43  |
| HIST1H2AD   | 0.46  | 1.72   |
| HIST1H2AE   | 0.564 | 18.77  |
| HIST1H2AG   | 2.251 | 0.79   |
| HIST1H2AH   | 0.439 | 0.45   |
| HIST1H2AI   | 0.469 | 2.32   |
| HIST1H2AJ   | 0.439 | 0.9    |
| HIST1H2AK   | 0.46  | 1.29   |
| HIST1H2AL   | 0.47  | 0.42   |
| HIST1H2AM   | 0.487 | 1.42   |
| HIST1H2APS2 | 0.291 | 0      |
| HIST1H2APS4 | 0.348 | 0      |
| HIST1H2APS5 | 0.651 | 0.15   |
| HIST1H2BA   | 0.437 | 0      |
| HIST1H2BB   | 0.431 | 0      |
| HIST1H2BC   | 0.438 | 6.33   |
| HIST1H2BD   | 0.907 | 6.65   |
| HIST1H2BE   | 0.435 | 0      |
| HIST1H2BF   | 0.43  | 3.68   |
| HIST1H2BG   | 0.445 | 8.45   |
| HIST1H2BH   | 0.425 | 4.19   |
| HIST1H2BI   | 0.437 | 0.68   |
| HIST1H2BJ   | 0.481 | 4.73   |
| HIST1H2BK   | 0.82  | 114.14 |
| HIST1H2BL   | 0.453 | 1.09   |
| HIST1H2BM   | 0.446 | 0.44   |
| HIST1H2BN   | 0.449 | 2.2    |
| HIST1H2BO   | 0.467 | 3.81   |
| HIST1H2BPS2 | 0.34  | 0.58   |
| HIST1H3A    | 0.469 | 1.48   |
| HIST1H3B    | 0.472 | 1.05   |
| HIST1H3C    | 0.459 | 0.21   |
| HIST1H3D    | 0.864 | 2.98   |
| HIST1H3E    | 0.462 | 2.14   |
| HIST1H3F    | 0.466 | 0      |
| HIST1H3G    | 0.467 | 0      |
| HIST1H3H    | 0.473 | 6.91   |
| HIST1H3I    | 0.477 | 0.42   |
| HIST1H3J    | 0.478 | 0      |
| HIST1H4A    | 0.372 | 1.6    |

|            |       |        |
|------------|-------|--------|
| HIST1H4B   | 0.357 | 0.83   |
| HIST1H4C   | 0.39  | 1.52   |
| HIST1H4D   | 0.367 | 0      |
| HIST1H4E   | 0.377 | 12.86  |
| HIST1H4F   | 0.368 | 0.53   |
| HIST1H4G   | 0.367 | 0      |
| HIST1H4H   | 0.374 | 18.26  |
| HIST1H4I   | 0.37  | 0.53   |
| HIST1H4J   | 0.356 | 5.56   |
| HIST1H4K   | 0.354 | 11.74  |
| HIST1H4L   | 0.364 | 0.82   |
| HIST1H4PS1 | 0.171 | 0      |
| HIST2H2AA3 | 1.035 | 68.54  |
| HIST2H2AA4 | 0.855 | 40.04  |
| HIST2H2AB  | 0.448 | 3.31   |
| HIST2H2AC  | 0.437 | 1.36   |
| HIST2H2BA  | 0.381 | 0      |
| HIST2H2BC  | 0.582 | 5.78   |
| HIST2H2BD  | 0.495 | 5.8    |
| HIST2H2BE  | 2.223 | 41.22  |
| HIST2H2BF  | 1.797 | 1.7    |
| HIST2H3A   | 0.507 | 1.95   |
| HIST2H3C   | 0.507 | 1.37   |
| HIST2H3D   | 0.543 | 0.18   |
| HIST2H3PS2 | 0.411 | 0      |
| HIST2H4A   | 0.396 | 32.98  |
| HIST2H4B   | 0.396 | 29.73  |
| HIST3H2A   | 0.496 | 1      |
| HIST3H2BA  | 0.379 | 0.52   |
| HIST3H2BB  | 0.452 | 0      |
| HIST3H3    | 0.481 | 0      |
| HIST4H4    | 0.412 | 10.81  |
| HIVEP1     | 9.026 | 4.44   |
| HIVEP2     | 9.086 | 5.13   |
| HIVEP3     | 8.544 | 1.44   |
| HK1        | 4.528 | 3.54   |
| HK2        | 7.093 | 1.6    |
| HK3        | 3.05  | 1.53   |
| HKDC1      | 3.679 | 0.03   |
| HKR1       | 2.929 | 10.95  |
| HLA-16     | 2.51  | 0.08   |
| HLA-21     | 1.117 | 0.27   |
| HLA-75     | 3.576 | 0      |
| HLA-80     | 3.225 | 0      |
| HLA-90     | 6.092 | 0      |
| HLA-A      | 3.128 | 130.57 |
| HLA-B      | 3.036 | 181.06 |
| HLA-C      | 4.787 | 36.19  |
| HLA-DMA    | 3.222 | 0      |
| HLA-DMB    | 4.074 | 8.99   |

|          |        |        |
|----------|--------|--------|
| HLA-DOA  | 10.455 | 2.28   |
| HLA-DOB  | 2.644  | 7.3    |
| HLA-DPA1 | 3.471  | 3.33   |
| HLA-DPB1 | 3.002  | 260.72 |
| HLA-DPB2 | 51.612 | 9.44   |
| HLA-DQA1 | 5.26   | 24.3   |
| HLA-DQA2 | 5.141  | 0      |
| HLA-DQB1 | 6.488  | 131.72 |
| HLA-DQB2 | 3.177  | 0.09   |
| HLA-DRA  | 3.756  | 20.7   |
| HLA-DRB1 | 5.21   | 110.82 |
| HLA-DRB2 | 15.03  | 1.81   |
| HLA-DRB3 | 2.316  | 0      |
| HLA-DRB4 | 2.387  | 0      |
| HLA-DRB5 | 1.385  | 322.6  |
| HLA-DRB6 | 8.525  | 0.91   |
| HLA-DRB7 | 19.496 | 0      |
| HLA-DRB8 | 2.537  | 0      |
| HLA-DRB9 | 1.811  | 0      |
| HLA-E    | 5.07   | 1.62   |
| HLA-F    | 3.564  | 1.64   |
| HLA-G    | 5.554  | 0.02   |
| HLA-H    | 11.492 | 0.38   |
| HLA-J    | 2.775  | 0      |
| HLA-K    | 3.252  | 0.33   |
| HLA-L    | 14.499 | 0.05   |
| HLCS     | 5.977  | 0.58   |
| HLF      | 4.01   | 0      |
| HLTF     | 6.573  | 2.24   |
| HLX1     | 2.528  | 46.38  |
| HLXB9    | 4.353  | 0      |
| HM13     | 4.009  | 9.13   |
| HMBOX1   | 2.881  | 3.13   |
| HMBS     | 1.655  | 0.77   |
| HMCN1    | 18.206 | 0      |
| HMCN2    | 9.649  | 0      |
| HMFN0672 | 2.633  | 0.15   |
| HMG14P   | 0.576  | 0      |
| HMG17L1  | 1.46   | 0.07   |
| HMG17L2  | 0.265  | 0      |
| HMG17P1  | 2.288  | 0      |
| HMG1L1   | 0.636  | 0.93   |
| HMG1L3   | 0.446  | 0      |
| HMG1L4   | 0.566  | 0.35   |
| HMG1L5   | 0.997  | 1.89   |
| HMG1L8   | 1.609  | 0.25   |
| HMG1L9   | 1.575  | 1.82   |
| HMG20A   | 3.885  | 3.85   |
| HMG20B   | 1.796  | 23.46  |
| HMG2L1   | 5.262  | 3.08   |

|           |         |       |
|-----------|---------|-------|
| HMG4L     | 0.888   | 0     |
| HMG4L2    | 0.581   | 0     |
| HMGA1     | 2.618   | 38.24 |
| HMGA1L1   | 2.082   | 0.42  |
| HMGA1L2   | 1.397   | 2.83  |
| HMGA1L3   | 1.814   | 2.73  |
| HMGA2     | 4.609   | 0.41  |
| HMGB1     | 5.604   | 36.79 |
| HMGB1P    | 0.972   | 0.61  |
| HMGB2     | 1.264   | 426.9 |
| HMGB3     | 3.556   | 2.62  |
| HMGB4     | 2.981   | 0     |
| HMGCL     | 1.608   | 2.77  |
| HMGCLL1   | 2.532   | 0     |
| HMGCR     | 4.475   | 2.61  |
| HMGCS1    | 3.336   | 3.14  |
| HMGCS2    | 2.046   | 0     |
| HMGN1     | 1.918   | 25.12 |
| HMGN1P1   | 0.936   | 1.48  |
| HMGN2     | 1.52    | 27.54 |
| HMGN2P    | 0.677   | 0.14  |
| HMGN2P2   | 1.097   | 0.09  |
| HMGN3     | 1.848   | 16.28 |
| HMGN4     | 1.969   | 7.99  |
| HMHA1     | 5.016   | 43.29 |
| HMHB1     | 0.384   | 10.57 |
| HMMR      | 2.988   | 0.13  |
| HMOX1     | 1.55    | 2.93  |
| HMOX2     | 1.626   | 2.61  |
| HMP19     | 2.335   | 0     |
| HMSD      | 12.607  | 0     |
| HMX1      | 1.896   | 0     |
| HMX2      | 1.628   | 0.06  |
| HMX3      | 2.163   | 0     |
| HN1       | 3.463   | 2.03  |
| HN1L      | 3.683   | 0.89  |
| HNF4A     | 4.04    | 0     |
| HNF4G     | 4.1     | 0     |
| HNMT      | 4.178   | 0.1   |
| hnRNPA1p  | 0.892   | 1.33  |
| HNRNPG-T  | 2.097   | 0     |
| HNRPA0    | 2.967   | 70.8  |
| HNRPA1    | 3.757   | 51.09 |
| HNRPA1L-2 | 1.354   | 0.22  |
| HNRPA1L3  | 1.73    | 0.35  |
| HNRPA1P3  | 0.465   | 0.43  |
| HNRPA1P4  | 316.052 | 0     |
| HNRPA1P5  | 0.7     | 0     |
| HNRPA1P6  | 0.978   | 5.36  |
| HNRPA2B1  | 8.391   | 62.95 |

|             |       |        |
|-------------|-------|--------|
| HNRPA3      | 3.33  | 36.75  |
| HNRPA3P1    | 3.006 | 0.92   |
| HNRPAB      | 1.816 | 11.98  |
| HNRPC       | 3.229 | 47.03  |
| HNRPCL1     | 1.108 | 3.22   |
| HNRPCP      | 1.613 | 1.47   |
| HNRPD       | 3.742 | 114.35 |
| HNRPDL      | 4.136 | 86.6   |
| HNRPDP      | 1.036 | 30.37  |
| HNRPF       | 2.591 | 43.46  |
| HNRPH1      | 6.56  | 199.03 |
| HNRPH2      | 2.42  | 52.29  |
| HNRPH3      | 5.831 | 63.97  |
| HNRPK       | 5.071 | 56.76  |
| HNRPL       | 5.205 | 57.37  |
| HNRPLL      | 2.035 | 0.87   |
| HNRPM       | 5.347 | 44.92  |
| HNRPR       | 2.663 | 54.43  |
| HNRPU       | 8.227 | 30.86  |
| HNRPUL1     | 7.593 | 62.87  |
| HNRPUL2     | 5.222 | 21.46  |
| HNRPUP      | 0.651 | 47.42  |
| HNT         | 3.375 | 0      |
| HOMER1      | 4.214 | 0.23   |
| HOMER2      | 3.114 | 1.15   |
| HOMER3      | 1.517 | 0.39   |
| HOMEZ       | 3.665 | 0.19   |
| HOM-TES-103 | 3.215 | 4.89   |
| HOOK1       | 2.457 | 0      |
| HOOK2       | 2.513 | 1.69   |
| HOOK3       | 3.685 | 3.63   |
| HOP         | 1.368 | 0.51   |
| HORMAD1     | 1.879 | 0.05   |
| HORMAD2     | 1.895 | 0      |
| HOXA1       | 9.602 | 0.01   |
| HOXA10      | 6.3   | 0      |
| HOXA11      | 5.306 | 0.02   |
| HOXA11S     | 3.098 | 0      |
| HOXA13      | 5.027 | 0.02   |
| HOXA2       | 3.556 | 0      |
| HOXA3       | 7.437 | 0.01   |
| HOXA4       | 3.688 | 0      |
| HOXA5       | 2.664 | 0      |
| HOXA6       | 1.726 | 0.05   |
| HOXA7       | 4.036 | 0      |
| HOXA9       | 4.114 | 0.07   |
| HOXB1       | 1.014 | 0      |
| HOXB13      | 3.038 | 0      |
| HOXB2       | 1.604 | 0.19   |
| HOXB3       | 3.618 | 0.11   |

|         |        |        |
|---------|--------|--------|
| HOXB4   | 2.033  | 0.04   |
| HOXB5   | 1.821  | 0      |
| HOXB6   | 1.676  | 0      |
| HOXB7   | 1.367  | 1.96   |
| HOXB8   | 1.823  | 0.05   |
| HOXB9   | 2.701  | 0      |
| HOXC10  | 1.96   | 0      |
| HOXC11  | 2.037  | 0      |
| HOXC12  | 0.849  | 0      |
| HOXC13  | 2.396  | 0      |
| HOXC4   | 2.346  | 0      |
| HOXC5   | 3.254  | 0      |
| HOXC6   | 2.584  | 0      |
| HOXC8   | 2.29   | 0      |
| HOXC9   | 1.542  | 0      |
| HOXD1   | 2.066  | 132.6  |
| HOXD10  | 1.804  | 0      |
| HOXD11  | 1.463  | 0      |
| HOXD12  | 0.841  | 0      |
| HOXD13  | 1.461  | 0      |
| HOXD3   | 2.299  | 0      |
| HOXD4   | 1.298  | 0      |
| HOXD8   | 1.879  | 0      |
| HOXD9   | 2.089  | 0.33   |
| HP      | 1.433  | 2.21   |
| HP1BP3  | 2.092  | 10.92  |
| HPCA    | 1.406  | 0      |
| HPCAL1  | 2.834  | 21.4   |
| HPCAL4  | 4.259  | 0.09   |
| HPD     | 1.423  | 0.14   |
| HPGD    | 2.537  | 0.23   |
| H-plk   | 5.748  | 2.52   |
| HPN     | 2.568  | 0.35   |
| HPR     | 1.242  | 0.48   |
| HPRT1   | 1.331  | 6.02   |
| HPRTP2  | 1.108  | 0.18   |
| HPS1    | 6.336  | 6.26   |
| HPS3    | 4.451  | 0.43   |
| HPS4    | 11.287 | 190.06 |
| HPS5    | 5.115  | 1.3    |
| HPS6    | 2.647  | 7.44   |
| HPSE    | 1.793  | 0      |
| HPSE2   | 2.293  | 0      |
| HPX     | 1.389  | 0.14   |
| HR      | 4.981  | 0.77   |
| HRAS    | 1.251  | 3.16   |
| HRASLS  | 1.062  | 0      |
| HRASLS2 | 0.742  | 0      |
| HRASLS3 | 1.066  | 0.28   |
| HRASLS5 | 1.166  | 0      |

|           |        |       |
|-----------|--------|-------|
| HRB       | 6.513  | 22.16 |
| HRBL      | 9.621  | 7.34  |
| HRC       | 2.385  | 0     |
| HRG       | 1.952  | 0     |
| HRH1      | 3.868  | 0.15  |
| HRH2      | 3.315  | 22.98 |
| HRH3      | 2.671  | 0     |
| HRH4      | 3.668  | 0     |
| HRK       | 0.697  | 0.28  |
| HRNBP3    | 0.445  | 0     |
| HRNR      | 9.623  | 0     |
| HRSP12    | 1.011  | 0.1   |
| HS1BP3    | 2.403  | 1.52  |
| HS2ST1    | 6.714  | 0.87  |
| HS322B1A  | 7.385  | 0.01  |
| HS3ST1    | 1.965  | 0.05  |
| HS3ST2    | 1.952  | 0     |
| HS3ST3A1  | 2.527  | 0.04  |
| HS3ST3B1  | 2.676  | 5.25  |
| HS3ST4    | 2.808  | 0     |
| HS3ST5    | 1.041  | 0     |
| HS3ST6    | 0.936  | 0     |
| HS6ST1    | 2.055  | 2.32  |
| HS6ST2    | 4.441  | 0     |
| HS6ST3    | 7.8    | 0     |
| HSBP1     | 1.891  | 5.23  |
| HSBP1P1   | 0.521  | 0.76  |
| HSCB      | 1.09   | 2.91  |
| HSD11B1   | 1.512  | 0     |
| HSD11B1L  | 3.428  | 0.4   |
| HSD11B2   | 1.884  | 0     |
| HSD17B1   | 2.23   | 1.47  |
| HSD17B10  | 1.045  | 18.09 |
| HSD17B11  | 1.675  | 35.61 |
| HSD17B12  | 2.383  | 4.07  |
| HSD17B13  | 2.377  | 0.71  |
| HSD17B14  | 1.237  | 1.84  |
| HSD17B2   | 1.427  | 0     |
| HSD17B3   | 1.134  | 0     |
| HSD17B4   | 2.594  | 1.79  |
| HSD17B6   | 1.512  | 0     |
| HSD17B7   | 1.519  | 2.02  |
| HSD17B7P2 | 24.055 | 0.28  |
| HSD17B8   | 2.967  | 0     |
| HSD3B1    | 1.648  | 0     |
| HSD3B2    | 1.669  | 0     |
| HSD3B7    | 2.17   | 0.13  |
| HSDL1     | 3.488  | 1.08  |
| HSDL2     | 3.21   | 1.48  |
| HSF1      | 2.137  | 25.92 |

|           |       |        |
|-----------|-------|--------|
| HSF2      | 2.445 | 7.81   |
| HSF2BP    | 1.899 | 0      |
| HSF4      | 1.546 | 9.22   |
| HSF5      | 4.107 | 0.07   |
| HSFX1     | 2.019 | 0      |
| HSFY1     | 2.816 | 0      |
| HSFY2     | 2.834 | 0      |
| HSH2D     | 2.367 | 7.61   |
| HSMPP8    | 3.234 | 10.8   |
| HSN2      | 1.305 | 1.67   |
| HSP40     | 2.877 | 0.17   |
| HSP90AA1  | 4.418 | 63.44  |
| HSP90AA2  | 3.218 | 12.33  |
| HSP90AA3P | 2.81  | 0.78   |
| HSP90AA4P | 2.287 | 1.51   |
| HSP90AB1  | 2.538 | 145.13 |
| HSP90AB2P | 1.277 | 7.59   |
| HSP90AB3P | 2.546 | 16.21  |
| HSP90AB4P | 3.541 | 0.17   |
| HSP90AB5P | 2.212 | 0      |
| HSP90B1   | 2.78  | 33.81  |
| HSP90B2P  | 2.083 | 5.46   |
| HSP90B3P  | 10.13 | 0.23   |
| HSPA12A   | 7.196 | 0      |
| HSPA12B   | 3.109 | 6.59   |
| HSPA14    | 1.806 | 5.09   |
| HSPA1A    | 7.149 | 0.08   |
| HSPA1B    | 7.531 | 0.08   |
| HSPA1L    | 7.527 | 0      |
| HSPA2     | 2.464 | 0.6    |
| HSPA4     | 3.526 | 20.59  |
| HSPA4L    | 3.27  | 0      |
| HSPA5     | 3.908 | 46.81  |
| HSPA6     | 2.652 | 1.75   |
| HSPA8     | 2.42  | 90.52  |
| HSPA9     | 3.138 | 37.14  |
| HSPA9P    | 2.733 | 5.25   |
| HSPB1     | 1.694 | 80.01  |
| HSPB2     | 0.802 | 0      |
| HSPB3     | 0.763 | 0      |
| HSPB6     | 1.457 | 0      |
| HSPB7     | 2.557 | 0      |
| HSPB8     | 2.002 | 0      |
| HSPB9     | 0.48  | 1.44   |
| HSPBAP1   | 1.936 | 3.16   |
| HSPBP1    | 1.769 | 4.7    |
| HSPC049   | 6.712 | 14.02  |
| HSPC072   | 0.963 | 0.31   |
| HSPC105   | 1.232 | 0      |
| HSPC111   | 1.418 | 17.93  |



|         |        |       |
|---------|--------|-------|
| HSPC142 | 1.464  | 22.03 |
| HSPC148 | 1.017  | 20.34 |
| HSPC152 | 0.583  | 51.93 |
| HSPC159 | 0.771  | 1.93  |
| HSPC171 | 0.821  | 17.84 |
| HSPC268 | 2.024  | 2.54  |
| HSPD1   | 2.436  | 13.77 |
| HSPDP3  | 1.787  | 0.11  |
| HSPDP7  | 2.349  | 0     |
| HSPE1   | 0.538  | 5.7   |
| HSPEP1  | 0.318  | 0     |
| HSPEP2  | 0.465  | 0.64  |
| HSPG2   | 14.288 | 1.56  |
| HSPH1   | 3.668  | 3.83  |
| HSZFP36 | 2.368  | 2.88  |
| HTATIP  | 2.393  | 9.51  |
| HTATIP2 | 1.418  | 1.74  |
| HTATSF1 | 2.759  | 7.24  |
| HTF9C   | 3.12   | 8.27  |
| HTN1    | 0.537  | 0     |
| HTN3    | 0.524  | 0     |
| HTR1A   | 1.269  | 0     |
| HTR1B   | 1.173  | 0.08  |
| HTR1D   | 2.835  | 0     |
| HTR1E   | 1.913  | 0     |
| HTR1F   | 1.101  | 0.81  |
| HTR2A   | 3.009  | 0     |
| HTR2B   | 2.227  | 0.22  |
| HTR2C   | 4.751  | 0     |
| HTR3A   | 2.654  | 0.07  |
| HTR3B   | 1.817  | 0     |
| HTR3C   | 1.699  | 0     |
| HTR3D   | 1.459  | 0     |
| HTR3E   | 1.912  | 0     |
| HTR4    | 4.519  | 0     |
| HTR5A   | 4.803  | 0     |
| HTR6    | 1.984  | 0     |
| HTR7    | 7.495  | 0.01  |
| HTR7P   | 7.289  | 0.39  |
| HTRA1   | 2.103  | 0     |
| HTRA2   | 2.55   | 9.63  |
| HTRA3   | 2.537  | 8.69  |
| HTRA4   | 1.764  | 1.63  |
| HUNK    | 7.385  | 0.02  |
| HUS1    | 4.286  | 1.17  |
| HUS1B   | 1.026  | 0.2   |
| HUWE1   | 13.644 | 9.99  |
| HVCN1   | 2.596  | 19.78 |
| HYAL1   | 6.246  | 0.04  |
| HYAL2   | 1.95   | 0.3   |

|          |       |        |
|----------|-------|--------|
| HYAL3    | 1.942 | 0.15   |
| HYAL4    | 4.814 | 0      |
| HYALP1   | 12.55 | 0      |
| HYDIN    | 3.659 | 0      |
| HYI      | 0.985 | 11.86  |
| HYLS1    | 1.81  | 0.54   |
| HYMAI    | 5.005 | 0      |
| HYOU1    | 4.556 | 3.48   |
| HYPE     | 1.651 | 0.42   |
| HYPK     | 1.349 | 12.03  |
| IAH1     | 1.376 | 15.17  |
| IAPP     | 1.462 | 0      |
| IARS     | 5.164 | 12.62  |
| IARS2    | 3.549 | 6.13   |
| IBRDC1   | 1.784 | 0      |
| IBRDC2   | 4.768 | 1.08   |
| IBRDC3   | 1.987 | 7.02   |
| IBSP     | 1.081 | 0      |
| IBTK     | 5.775 | 3.17   |
| ICA1     | 4.907 | 0.04   |
| ICA1L    | 4.691 | 0.46   |
| ICAM1    | 2.984 | 2.98   |
| ICAM2    | 1.035 | 15.1   |
| ICAM3    | 1.742 | 26.75  |
| ICAM4    | 3.023 | 0.72   |
| ICAM5    | 3.001 | 0.06   |
| ICEBERG  | 0.431 | 0      |
| ICHTHYIN | 3.269 | 0      |
| ICK      | 6.403 | 0.88   |
| ICMT     | 4.815 | 0.64   |
| ICOS     | 2.613 | 0.34   |
| ICOSLG   | 4.996 | 41.13  |
| ICT1     | 0.879 | 3.16   |
| ID1      | 2.106 | 1.6    |
| ID2      | 1.364 | 21.68  |
| ID2B     | 1.174 | 0.51   |
| ID3      | 1.716 | 120.27 |
| ID4      | 2.344 | 0      |
| IDE      | 3.279 | 2.08   |
| IDH1     | 2.329 | 2.13   |
| IDH2     | 1.733 | 36.42  |
| IDH3A    | 2.665 | 1.78   |
| IDH3B    | 2.335 | 38.6   |
| IDH3G    | 1.981 | 18.33  |
| IDI1     | 2.427 | 43.13  |
| IDI2     | 1.359 | 0.14   |
| IDS      | 2.75  | 2.27   |
| IDSP1    | 1.625 | 0.43   |
| IDUA     | 2.628 | 10.69  |
| IER2     | 2.05  | 71.96  |

|         |       |        |
|---------|-------|--------|
| IER3    | 5.457 | 0      |
| IER3IP1 | 1.45  | 5.94   |
| IER5    | 2.337 | 18.42  |
| IER5L   | 1.224 | 0.32   |
| IFI16   | 3.85  | 37.7   |
| IFI27   | 0.652 | 0.91   |
| IFI30   | 1.032 | 15.82  |
| IFI35   | 1.164 | 6.37   |
| IFI44   | 1.681 | 8.77   |
| IFI44L  | 2.048 | 0      |
| IFI6    | 1.012 | 5.18   |
| IFIH1   | 3.421 | 1.68   |
| IFIT1   | 3.344 | 0.15   |
| IFIT1L  | 1.972 | 0      |
| IFIT1P  | 0.713 | 0.14   |
| IFIT2   | 3.046 | 1.1    |
| IFIT3   | 2.505 | 0.39   |
| IFIT5   | 3.914 | 2.3    |
| IFITM1  | 0.855 | 155.41 |
| IFITM2  | 0.904 | 141.95 |
| IFITM3  | 0.808 | 190.65 |
| IFITM4P | 1.028 | 0      |
| IFITM5  | 0.733 | 1.48   |
| IFITM8P | 0.399 | 0.25   |
| IFLTD1  | 1.718 | 0      |
| IFNA1   | 0.876 | 0      |
| IFNA10  | 0.963 | 0      |
| IFNA13  | 0.653 | 0      |
| IFNA14  | 0.99  | 0      |
| IFNA16  | 0.939 | 0      |
| IFNA17  | 0.98  | 0      |
| IFNA2   | 1.143 | 0      |
| IFNA21  | 0.984 | 0      |
| IFNA4   | 0.978 | 0      |
| IFNA5   | 0.57  | 0      |
| IFNA6   | 0.57  | 0      |
| IFNA7   | 0.737 | 0      |
| IFNA8   | 1.042 | 0      |
| IFNAP22 | 0.57  | 0      |
| IFNAR1  | 6.095 | 1.53   |
| IFNAR2  | 3.178 | 5.82   |
| IFNB1   | 0.84  | 0      |
| IFNE1   | 1.475 | 0      |
| IFNG    | 1.21  | 0.25   |
| IFNGR1  | 2.249 | 20.54  |
| IFNGR2  | 2.494 | 19.6   |
| IFNK    | 1.14  | 0      |
| IFNW1   | 1.514 | 0      |
| IFNWP12 | 0.31  | 0      |
| IFNWP19 | 1.359 | 0      |

|          |       |       |
|----------|-------|-------|
| IFP38    | 1.051 | 0     |
| IFRD1    | 5.402 | 2.35  |
| IFRD2    | 2.045 | 3.48  |
| IFRG15   | 0.396 | 50.72 |
| IFT122   | 4.348 | 5.14  |
| IFT140   | 4.935 | 2.41  |
| IFT172   | 5.36  | 3.08  |
| IFT20    | 0.974 | 10.87 |
| IFT52    | 1.675 | 5.43  |
| IFT57    | 3.539 | 9.59  |
| IFT74    | 1.995 | 1.14  |
| IFT80    | 4.292 | 2.28  |
| IFT81    | 4.781 | 0.14  |
| IFT88    | 3.256 | 0.97  |
| IGBP1    | 1.661 | 43.01 |
| IGF1     | 7.236 | 0     |
| IGF1R    | 4.99  | 2.48  |
| IGF2     | 3.97  | 0.03  |
| IGF2AS   | 2.061 | 0     |
| IGF2BP1  | 8.769 | 0     |
| IGF2BP2  | 4.55  | 13.5  |
| IGF2BP3  | 8.318 | 4.17  |
| IGF2R    | 9.329 | 17.9  |
| IGFALS   | 2.056 | 0.44  |
| IGFBP1   | 3.79  | 0     |
| IGFBP2   | 1.43  | 0.14  |
| IGFBP3   | 6.068 | 0.02  |
| IGFBP4   | 2.236 | 28.18 |
| IGFBP5   | 6.238 | 0     |
| IGFBP6   | 0.966 | 0     |
| IGFBP7   | 1.11  | 15.07 |
| IGFBPL1  | 1.093 | 0     |
| IGFL1    | 0.769 | 0     |
| IGFL2    | 0.885 | 0     |
| IGFL3    | 0.662 | 0     |
| IGFL4    | 0.573 | 0     |
| IGHA1    | 1.061 | 24.25 |
| IGHA2    | 1.019 | 2.52  |
| IGHD     | 2.506 | 17.33 |
| IGHD1-1  | 0.1   | 0     |
| IGHD1-14 | 0.1   | 0     |
| IGHD1-20 | 0.1   | 0     |
| IGHD1-26 | 0.1   | 0     |
| IGHD1-7  | 0.1   | 0     |
| IGHD2-15 | 0.1   | 0     |
| IGHD2-2  | 0.1   | 0     |
| IGHD2-21 | 0.1   | 0     |
| IGHD2-8  | 0.1   | 0     |
| IGHD3-10 | 0.1   | 0     |
| IGHD3-16 | 0.1   | 0     |

|             |        |        |
|-------------|--------|--------|
| IGHD3-22    | 0.1    | 0      |
| IGHD3-3     | 0.1    | 0      |
| IGHD3-9     | 0.1    | 0      |
| IGHD4-11    | 0.1    | 0      |
| IGHD4-17    | 0.1    | 0      |
| IGHD4-23    | 0.1    | 0      |
| IGHD4-4     | 0.1    | 0      |
| IGHD5-12    | 0.1    | 0      |
| IGHD5-18    | 0.1    | 0      |
| IGHD5-24    | 0.1    | 0      |
| IGHD5-5     | 0.1    | 0      |
| IGHD6-13    | 0.1    | 0      |
| IGHD6-19    | 0.1    | 0      |
| IGHD6-25    | 0.1    | 0      |
| IGHD6-6     | 0.1    | 0      |
| IGHD7-27    | 0.1    | 0      |
| IGHE        | 1.286  | 0      |
| IGHEP1      | 1.951  | 0      |
| IGHEP2      | 1.258  | 0.31   |
| IGHG1       | 0.992  | 11.47  |
| IGHG2       | 0.98   | 5.25   |
| IGHG3       | 1.663  | 8.8    |
| IGHG4       | 0.983  | 0.81   |
| IGHGP       | 3.089  | 1.47   |
| IGHJ1       | 0.1    | 0.99   |
| IGHJ1P      | 0.1    | 0      |
| IGHJ2       | 0.1    | 0      |
| IGHJ2P      | 0.1    | 0      |
| IGHJ3       | 0.1    | 0      |
| IGHJ3P      | 0.1    | 15.83  |
| IGHJ4       | 0.1    | 4.94   |
| IGHJ5       | 0.768  | 21.26  |
| IGHJ6       | 2.716  | 34.79  |
| IGHM        | 2.077  | 487.54 |
| IGHMBP2     | 3.891  | 2.39   |
| IGHV1-12    | 0.495  | 0      |
| IGHV1-14    | 0.25   | 0      |
| IGHV1-17    | 0.789  | 0      |
| IGHV1-18    | 0.353  | 0.28   |
| IGHV1-2     | 0.353  | 0      |
| IGHV1-24    | 0.353  | 0      |
| IGHV1-3     | 0.353  | 0.56   |
| IGHV1-45    | 0.353  | 0      |
| IGHV1-46    | 0.353  | 0.84   |
| IGHV1-58    | 0.353  | 0      |
| IGHV1-67    | 0.797  | 0      |
| IGHV1-68    | 0.871  | 0      |
| IGHV1-69    | 0.353  | 3.36   |
| IGHV1-8     | 0.353  | 0      |
| IGHV1OR15-1 | 13.265 | 0.01   |

|            |       |      |
|------------|-------|------|
| IGHV2-10   | 0.796 | 0    |
| IGHV2-26   | 0.358 | 0.28 |
| IGHV2-5    | 0.358 | 4.7  |
| IGHV2-70   | 0.358 | 3.32 |
| IGHV3-11   | 0.353 | 0.28 |
| IGHV3-13   | 0.35  | 0    |
| IGHV3-15   | 0.359 | 0.55 |
| IGHV3-16   | 0.353 | 0    |
| IGHV3-19   | 0.293 | 0    |
| IGHV3-20   | 0.353 | 0    |
| IGHV3-21   | 0.353 | 0.28 |
| IGHV3-22   | 0.821 | 0    |
| IGHV3-23   | 0.353 | 0.28 |
| IGHV3-25   | 0.807 | 0    |
| IGHV3-29   | 0.813 | 0    |
| IGHV3-30   | 0.353 | 2.8  |
| IGHV3-30-2 | 0.804 | 0    |
| IGHV3-32   | 0.813 | 0    |
| IGHV3-33   | 0.353 | 1.97 |
| IGHV3-33-2 | 0.804 | 0    |
| IGHV3-35   | 0.353 | 0    |
| IGHV3-36   | 0.821 | 0.12 |
| IGHV3-37   | 0.801 | 0    |
| IGHV3-38   | 0.347 | 0    |
| IGHV3-41   | 0.807 | 0    |
| IGHV3-42   | 0.767 | 0    |
| IGHV3-43   | 0.355 | 0    |
| IGHV3-47   | 0.81  | 0    |
| IGHV3-48   | 0.353 | 0.28 |
| IGHV3-49   | 0.359 | 0    |
| IGHV3-50   | 0.81  | 0    |
| IGHV3-52   | 0.804 | 0    |
| IGHV3-53   | 0.35  | 0.28 |
| IGHV3-54   | 0.803 | 0    |
| IGHV3-57   | 0.306 | 0    |
| IGHV3-6    | 0.807 | 0.36 |
| IGHV3-60   | 0.811 | 0    |
| IGHV3-62   | 0.809 | 0    |
| IGHV3-63   | 0.833 | 0    |
| IGHV3-64   | 0.353 | 0    |
| IGHV3-65   | 0.894 | 0    |
| IGHV3-66   | 0.35  | 0    |
| IGHV3-7    | 0.353 | 0    |
| IGHV3-71   | 0.821 | 0    |
| IGHV3-72   | 0.359 | 0    |
| IGHV3-73   | 0.359 | 0.28 |
| IGHV3-74   | 0.353 | 1.68 |
| IGHV3-75   | 0.836 | 0    |
| IGHV3-76   | 0.799 | 0    |
| IGHV3-79   | 0.812 | 0    |

|              |       |        |
|--------------|-------|--------|
| IGHV3-9      | 0.355 | 0      |
| IGHV4-28     | 0.353 | 0.56   |
| IGHV4-31     | 0.356 | 1.67   |
| IGHV4-34     | 0.35  | 2.26   |
| IGHV4-39     | 0.356 | 2.22   |
| IGHV4-4      | 0.35  | 0      |
| IGHV4-55     | 0.789 | 0.12   |
| IGHV4-59     | 0.35  | 189.39 |
| IGHV4-61     | 0.356 | 0.83   |
| IGHV4-80     | 0.719 | 0      |
| IGHV5-51     | 0.353 | 3.64   |
| IGHV5-78     | 0.787 | 0.37   |
| IGHV6-1      | 0.365 | 1.08   |
| IGHV7-27     | 0.744 | 0.13   |
| IGHV7-34-1   | 0.784 | 0      |
| IGHV7-40     | 0.203 | 0      |
| IGHV7-56     | 0.786 | 0      |
| IGHV7-81     | 0.353 | 0.28   |
| IGHVII-1-1   | 0.452 | 0      |
| IGHVII-15-1  | 0.271 | 0      |
| IGHVII-20-1  | 0.501 | 0      |
| IGHVII-22-1  | 0.269 | 0      |
| IGHVII-26-2  | 0.313 | 0      |
| IGHVII-28-1  | 0.253 | 0      |
| IGHVII-30-1  | 0.274 | 0      |
| IGHVII-31-1  | 0.103 | 0      |
| IGHVII-33-1  | 0.274 | 0      |
| IGHVII-40-1  | 0.1   | 0      |
| IGHVII-43-1  | 0.209 | 0      |
| IGHVII-44-2  | 0.237 | 0      |
| IGHVII-46-1  | 0.493 | 0      |
| IGHVII-49-1  | 0.271 | 0      |
| IGHVII-51-2  | 0.263 | 0      |
| IGHVII-53-1  | 0.27  | 0      |
| IGHVII-60-1  | 0.269 | 0      |
| IGHVII-62-1  | 0.273 | 0      |
| IGHVII-65-1  | 0.273 | 0      |
| IGHVII-67-1  | 0.15  | 0      |
| IGHVII-74-1  | 0.169 | 0      |
| IGHVII-78-1  | 0.275 | 0      |
| IGHVIII-11-1 | 0.187 | 0      |
| IGHVIII-13-1 | 0.299 | 0      |
| IGHVIII-16-1 | 0.305 | 0      |
| IGHVIII-2-1  | 0.302 | 0      |
| IGHVIII-22-2 | 0.274 | 0      |
| IGHVIII-25-1 | 0.242 | 0      |
| IGHVIII-26-1 | 0.307 | 0      |
| IGHVIII-38-1 | 0.293 | 0      |
| IGHVIII-44   | 0.255 | 0      |
| IGHVIII-47-1 | 0.304 | 0      |

|              |       |        |
|--------------|-------|--------|
| IGHVIII-5-1  | 0.1   | 0      |
| IGHVIII-51-1 | 0.307 | 0      |
| IGHVIII-5-2  | 0.261 | 0      |
| IGHVIII-67-2 | 0.1   | 0      |
| IGHVIII-67-3 | 0.275 | 0      |
| IGHVIII-67-4 | 0.306 | 0      |
| IGHVIII-76-1 | 0.307 | 0      |
| IGHVIII-82   | 0.292 | 0      |
| IGHVIV-44-1  | 0.775 | 0      |
| IGJ          | 1.056 | 118.05 |
| IGK@         | 0.1   | 0      |
| IGKC         | 0.323 | 83.32  |
| IGKDEL       | 0.1   | 0      |
| IGKJ1        | 0.1   | 0.99   |
| IGKJ2        | 0.1   | 0      |
| IGKJ3        | 0.1   | 0      |
| IGKJ4        | 0.1   | 2.97   |
| IGKJ5        | 0.1   | 0.99   |
| IGKV1-12     | 0.351 | 0.28   |
| IGKV1-13     | 0.351 | 0      |
| IGKV1-16     | 0.351 | 0      |
| IGKV1-17     | 0.351 | 1.13   |
| IGKV1-22     | 0.823 | 0      |
| IGKV1-27     | 0.351 | 1.41   |
| IGKV1-32     | 0.832 | 0      |
| IGKV1-33     | 0.351 | 0.85   |
| IGKV1-35     | 0.826 | 0      |
| IGKV1-37     | 0.351 | 0      |
| IGKV1-39     | 0.351 | 4.51   |
| IGKV1-5      | 0.351 | 3.1    |
| IGKV1-6      | 0.351 | 0.28   |
| IGKV1-8      | 0.345 | 0      |
| IGKV1-9      | 0.351 | 0      |
| IGKV1D-12    | 0.351 | 0      |
| IGKV1D-13    | 0.351 | 0      |
| IGKV1D-16    | 0.351 | 0      |
| IGKV1D-17    | 0.351 | 0      |
| IGKV1D-22    | 0.823 | 0      |
| IGKV1D-27    | 0.828 | 0      |
| IGKV1D-32    | 0.832 | 0      |
| IGKV1D-33    | 0.351 | 0.85   |
| IGKV1D-35    | 0.826 | 0      |
| IGKV1D-42    | 0.351 | 0      |
| IGKV1D-43    | 0.351 | 0      |
| IGKV1D-8     | 0.351 | 0      |
| IGKV2-10     | 1.055 | 0      |
| IGKV2-14     | 1.127 | 0      |
| IGKV2-18     | 1.137 | 0      |
| IGKV2-19     | 0.267 | 0      |
| IGKV2-23     | 0.988 | 0      |



|           |       |       |
|-----------|-------|-------|
| IGKV2-24  | 0.36  | 0.27  |
| IGKV2-26  | 1.117 | 0     |
| IGKV2-28  | 0.36  | 0.55  |
| IGKV2-29  | 1.087 | 0.09  |
| IGKV2-30  | 0.36  | 0     |
| IGKV2-36  | 0.234 | 0     |
| IGKV2-38  | 0.24  | 0     |
| IGKV2-4   | 1.088 | 0     |
| IGKV2-40  | 0.314 | 0     |
| IGKV2D-10 | 1.127 | 0     |
| IGKV2D-14 | 1.127 | 0     |
| IGKV2D-18 | 1.137 | 0     |
| IGKV2D-19 | 0.267 | 0     |
| IGKV2D-23 | 1.569 | 0     |
| IGKV2D-24 | 0.36  | 0.27  |
| IGKV2D-26 | 1.115 | 0     |
| IGKV2D-28 | 0.359 | 0.83  |
| IGKV2D-29 | 0.362 | 0.27  |
| IGKV2D-30 | 0.36  | 0     |
| IGKV2D-36 | 0.234 | 0     |
| IGKV3-11  | 0.345 | 2.01  |
| IGKV3-15  | 0.345 | 1.15  |
| IGKV3-20  | 0.348 | 3.13  |
| IGKV3-25  | 2.108 | 0     |
| IGKV3-31  | 0.871 | 0     |
| IGKV3-34  | 0.881 | 0     |
| IGKV3-7   | 0.348 | 0     |
| IGKV3D-11 | 0.345 | 1.15  |
| IGKV3D-15 | 0.345 | 1.15  |
| IGKV3D-20 | 0.348 | 0.57  |
| IGKV3D-25 | 2.081 | 0     |
| IGKV3D-31 | 0.881 | 0     |
| IGKV3D-34 | 0.881 | 0     |
| IGKV3D-7  | 0.357 | 0     |
| IGKV4-1   | 0.363 | 4.63  |
| IGKV5-2   | 0.345 | 0.28  |
| IGKV6-21  | 0.342 | 0     |
| IGKV6D-21 | 0.342 | 0     |
| IGKV6D-41 | 0.347 | 0     |
| IGKV7-3   | 0.956 | 0     |
| IGL@      | 0.673 | 13.53 |
| IGLC1     | 0.318 | 9.95  |
| IGLC2     | 0.318 | 11.82 |
| IGLC3     | 0.318 | 21.78 |
| IGLC4     | 0.253 | 0     |
| IGLC5     | 0.309 | 0     |
| IGLC6     | 0.324 | 0.31  |
| IGLC7     | 0.318 | 5.29  |
| IGLJ1     | 0.1   | 0     |
| IGLJ2     | 0.1   | 2.97  |

|           |       |      |
|-----------|-------|------|
| IGLJ3     | 0.1   | 1.98 |
| IGLJ4     | 0.1   | 0    |
| IGLJ5     | 0.1   | 0    |
| IGLJ6     | 0.1   | 0    |
| IGLJ7     | 0.1   | 0    |
| IGLJCOR18 | 0.432 | 0    |
| IGLL1     | 1.362 | 3.05 |
| IGLV10-54 | 0.296 | 0    |
| IGLV10-67 | 0.295 | 0    |
| IGLV11-55 | 0.312 | 0    |
| IGLV1-36  | 0.296 | 0    |
| IGLV1-40  | 0.299 | 0.33 |
| IGLV1-41  | 0.296 | 0    |
| IGLV1-44  | 0.296 | 3.01 |
| IGLV1-47  | 0.296 | 0.67 |
| IGLV1-50  | 0.299 | 0.33 |
| IGLV1-51  | 0.296 | 3.01 |
| IGLV1-62  | 0.298 | 0    |
| IGLV2-11  | 0.297 | 0.33 |
| IGLV2-14  | 0.297 | 1.99 |
| IGLV2-18  | 0.297 | 0    |
| IGLV2-23  | 0.297 | 5    |
| IGLV2-28  | 0.285 | 0    |
| IGLV2-33  | 0.297 | 0    |
| IGLV2-34  | 0.297 | 0    |
| IGLV2-5   | 0.298 | 0    |
| IGLV2-8   | 0.297 | 2.33 |
| IGLV3-1   | 0.285 | 6.6  |
| IGLV3-10  | 0.29  | 0    |
| IGLV3-12  | 0.29  | 0    |
| IGLV3-13  | 0.284 | 0    |
| IGLV3-15  | 0.285 | 0    |
| IGLV3-16  | 0.29  | 0    |
| IGLV3-17  | 0.281 | 0    |
| IGLV3-19  | 0.29  | 1.37 |
| IGLV3-2   | 0.284 | 0    |
| IGLV3-21  | 0.29  | 3.07 |
| IGLV3-22  | 0.284 | 0    |
| IGLV3-24  | 0.284 | 0    |
| IGLV3-25  | 0.29  | 1.71 |
| IGLV3-26  | 0.289 | 0    |
| IGLV3-27  | 0.284 | 0    |
| IGLV3-29  | 0.28  | 0    |
| IGLV3-30  | 0.295 | 0    |
| IGLV3-31  | 0.29  | 0    |
| IGLV3-32  | 0.29  | 0    |
| IGLV3-4   | 0.28  | 0    |
| IGLV3-6   | 0.284 | 0    |
| IGLV3-7   | 0.288 | 0    |
| IGLV3-9   | 0.285 | 0    |

|              |       |       |
|--------------|-------|-------|
| IGLV4-3      | 0.312 | 0     |
| IGLV4-60     | 0.299 | 0.33  |
| IGLV4-69     | 0.299 | 1.32  |
| IGLV5-37     | 0.312 | 0.32  |
| IGLV5-45     | 0.312 | 2.22  |
| IGLV5-48     | 0.312 | 1.9   |
| IGLV5-52     | 0.317 | 15.61 |
| IGLV6-57     | 0.296 | 2.01  |
| IGLV7-35     | 0.295 | 0     |
| IGLV7-43     | 0.294 | 0.34  |
| IGLV7-46     | 0.294 | 1.01  |
| IGLV8-61     | 0.296 | 1     |
| IGLV9-49     | 0.315 | 0.94  |
| IGLVI-20     | 0.286 | 0     |
| IGLVI-38     | 0.291 | 0     |
| IGLVI-42     | 0.291 | 0     |
| IGLVI-56     | 0.296 | 0     |
| IGLVI-63     | 0.297 | 0     |
| IGLVI-68     | 0.293 | 0     |
| IGLVI-70     | 0.293 | 0     |
| IGLVIV-53    | 0.313 | 0     |
| IGLVIV-59    | 0.324 | 0     |
| IGLVIV-64    | 0.319 | 0     |
| IGLVIV-65    | 0.307 | 0     |
| IGLVIV-66-1  | 0.316 | 0     |
| IGLVV-58     | 0.308 | 0     |
| IGLVV-66     | 0.303 | 0     |
| IGLVVI-22-1  | 0.29  | 0     |
| IGLVVI-25-1  | 0.3   | 0     |
| IGLVVII-41-1 | 0.299 | 0     |
| IGSF1        | 5.735 | 0     |
| IGSF10       | 7.872 | 0     |
| IGSF11       | 3.863 | 0.03  |
| IGSF2        | 3.324 | 0.09  |
| IGSF21       | 1.943 | 0     |
| IGSF22       | 3.935 | 0.98  |
| IGSF3        | 7.253 | 0.05  |
| IGSF6        | 1.028 | 0.96  |
| IGSF8        | 2.28  | 2.39  |
| IGSF9        | 3.994 | 0.44  |
| IGSF9B       | 7.298 | 0.02  |
| IHH          | 1.236 | 0     |
| IHPK1        | 4.856 | 32.29 |
| IHPK2        | 3.642 | 21.73 |
| IHPK3        | 2.614 | 0     |
| IK           | 1.784 | 28.62 |
| IKBKAP       | 5.902 | 2.43  |
| IKBKB        | 3.916 | 5.4   |
| IKBKE        | 3.263 | 0.73  |
| IKBKG        | 2.103 | 13.32 |

|          |        |       |
|----------|--------|-------|
| IKIP     | 4.796  | 0.86  |
| IKZF1    | 14.292 | 47.09 |
| IKZF2    | 2.49   | 0.56  |
| IKZF3    | 2.437  | 2.12  |
| IKZF4    | 4.396  | 1.08  |
| IKZF5    | 2.9    | 14.33 |
| IL10     | 1.629  | 1.16  |
| IL10RA   | 3.649  | 25.27 |
| IL10RB   | 1.935  | 4.96  |
| IL11     | 2.354  | 0     |
| IL11RA   | 2.039  | 6.41  |
| IL12A    | 1.437  | 2.76  |
| IL12B    | 2.347  | 0     |
| IL12RB1  | 2.872  | 1.21  |
| IL12RB2  | 4.04   | 0.12  |
| IL13     | 1.282  | 0     |
| IL13RA1  | 4.006  | 6.35  |
| IL13RA2  | 1.373  | 0     |
| IL15     | 2.093  | 0.94  |
| IL15RA   | 2.208  | 3.58  |
| IL16     | 14.09  | 3.32  |
| IL17A    | 1.859  | 0     |
| IL17B    | 0.695  | 0.14  |
| IL17C    | 1.045  | 0.1   |
| IL17D    | 1.861  | 0.27  |
| IL17F    | 0.808  | 0     |
| IL17RA   | 4.007  | 6.18  |
| IL17RB   | 4.303  | 0.07  |
| IL17RC   | 2.736  | 5.35  |
| IL17RD   | 4.455  | 0     |
| IL17RE   | 5.878  | 0.54  |
| IL18     | 1.145  | 4.24  |
| IL18BP   | 2.452  | 2.75  |
| IL18R1   | 3.522  | 0.84  |
| IL18RAP  | 2.668  | 2.56  |
| IL19     | 2.471  | 0     |
| IL1A     | 2.928  | 0     |
| IL1B     | 1.498  | 1.58  |
| IL1F10   | 1.441  | 0     |
| IL1F5    | 2.802  | 0     |
| IL1F6    | 0.477  | 0     |
| IL1F7    | 0.839  | 0     |
| IL1F8    | 1.739  | 0     |
| IL1F9    | 1.18   | 0     |
| IL1R1    | 4.907  | 0.53  |
| IL1R2    | 1.577  | 6.03  |
| IL1RAP   | 5.662  | 2.93  |
| IL1RAPL1 | 3.624  | 0     |
| IL1RAPL2 | 2.985  | 0     |
| IL1RL1   | 3.593  | 0.11  |

|         |        |       |
|---------|--------|-------|
| IL1RL2  | 1.964  | 0.05  |
| IL1RN   | 2.353  | 0.51  |
| IL2     | 1.029  | 0     |
| IL20    | 1.234  | 0     |
| IL20RA  | 3.682  | 0     |
| IL21    | 0.616  | 0     |
| IL21R   | 3.584  | 2.12  |
| IL22    | 1.147  | 0     |
| IL22RA1 | 2.798  | 0     |
| IL22RA2 | 4.851  | 0     |
| IL23A   | 1.042  | 0.67  |
| IL23R   | 2.826  | 0     |
| IL24    | 2.05   | 1.31  |
| IL25    | 1.755  | 0     |
| IL26    | 1.047  | 0     |
| IL27    | 1.044  | 0     |
| IL27RA  | 3.258  | 1.52  |
| IL28A   | 0.734  | 0     |
| IL28B   | 0.595  | 0     |
| IL28RA  | 8.959  | 0.06  |
| IL29    | 0.856  | 0     |
| IL2RA   | 2.306  | 1.63  |
| IL2RB   | 4.045  | 1.56  |
| IL2RG   | 1.451  | 21.21 |
| IL3     | 0.924  | 0     |
| IL31    | 0.904  | 0     |
| IL31RA  | 2.315  | 0     |
| IL32    | 1.527  | 3.17  |
| IL33    | 2.644  | 0     |
| IL3RA   | 1.71   | 27.31 |
| IL4     | 0.921  | 0     |
| IL4I1   | 2.406  | 0.12  |
| IL4R    | 3.862  | 9.48  |
| IL5     | 0.816  | 0     |
| IL5RA   | 3.005  | 0     |
| IL6     | 2.25   | 0     |
| IL6R    | 6.755  | 0.12  |
| IL6ST   | 8.247  | 30.79 |
| IL6STP  | 13.085 | 0.46  |
| IL7     | 2.078  | 0     |
| IL7R    | 3.309  | 14.47 |
| IL8     | 1.653  | 3.35  |
| IL8RA   | 2.486  | 1.51  |
| IL8RB   | 2.859  | 0.38  |
| IL8RBP  | 2.136  | 0     |
| IL9     | 0.591  | 0     |
| IL9R    | 7.78   | 0.04  |
| IL9RP4  | 7.117  | 0     |
| ILD1R1  | 2.659  | 0     |
| ILF2    | 1.612  | 47.88 |

|         |       |       |
|---------|-------|-------|
| ILF3    | 8.965 | 35.02 |
| ILK     | 2.14  | 9.8   |
| ILKAP   | 2.424 | 7.63  |
| ILVBL   | 2.786 | 8.06  |
| IMAA    | 2.552 | 0.7   |
| IMMMP1L | 0.795 | 1.87  |
| IMMMP2L | 3.038 | 0.26  |
| IMMT    | 2.697 | 8.55  |
| IMMTP   | 2.823 | 0.49  |
| IMP3    | 1.16  | 10.15 |
| IMP4    | 1.049 | 22.82 |
| IMP5    | 2.055 | 0     |
| IMPA1   | 2.322 | 2.64  |
| IMPA2   | 1.5   | 0.6   |
| IMPACT  | 3.683 | 1.56  |
| IMPAD1  | 3.267 | 7.36  |
| IMPDH1  | 7.392 | 3.31  |
| IMPDH2  | 2.396 | 57.11 |
| IMPG1   | 3.268 | 0     |
| IMPG2   | 4.454 | 0     |
| INA     | 3.226 | 0.06  |
| INADL   | 6.468 | 0.19  |
| INCA    | 0.466 | 0.43  |
| INCA1   | 1.383 | 0.79  |
| INCENP  | 3.521 | 1.43  |
| INDO    | 1.572 | 0     |
| INDOL1  | 1.029 | 0     |
| INE1    | 0.941 | 4.42  |
| INE2    | 1.874 | 0.37  |
| ING1    | 5.121 | 1.72  |
| ING2    | 1.116 | 0.98  |
| ING3    | 6.05  | 2.76  |
| ING4    | 1.699 | 4.13  |
| ING5    | 5.198 | 6.09  |
| INGX    | 0.771 | 0     |
| INHA    | 1.423 | 0     |
| INHBA   | 4.35  | 0.04  |
| INHBB   | 3.514 | 1.04  |
| INHBC   | 1.99  | 0     |
| INHBE   | 2.437 | 0     |
| INMT    | 5.122 | 0.02  |
| INOC1   | 6.592 | 16.46 |
| INPP1   | 1.692 | 2.57  |
| INPP4A  | 3.475 | 1.31  |
| INPP4B  | 2.936 | 2.02  |
| INPP5A  | 3.078 | 6.68  |
| INPP5B  | 3.979 | 4.72  |
| INPP5D  | 5.743 | 71.99 |
| INPP5E  | 3.376 | 3.02  |
| INPP5F  | 5.61  | 5.55  |

|        |        |       |
|--------|--------|-------|
| INPPL1 | 4.98   | 22.35 |
| INS    | 0.45   | 0     |
| INSC   | 1.807  | 0.11  |
| INSIG1 | 14.232 | 1.34  |
| INSIG2 | 2.583  | 1.64  |
| INSL3  | 0.742  | 0.27  |
| INSL4  | 0.615  | 0     |
| INSL5  | 0.715  | 0     |
| INSL6  | 0.708  | 0     |
| INSM1  | 2.829  | 0     |
| INSM2  | 3.013  | 0.04  |
| INSR   | 8.558  | 48.35 |
| INSRR  | 4.147  | 0     |
| INTS1  | 14.895 | 7.01  |
| INTS10 | 3.793  | 15.31 |
| INTS12 | 1.701  | 4.3   |
| INTS2  | 5.878  | 1.9   |
| INTS3  | 4.482  | 17.77 |
| INTS4  | 3.149  | 4.15  |
| INTS5  | 3.285  | 4.91  |
| INTS6  | 9.389  | 0.74  |
| INTS7  | 3.462  | 1.08  |
| INTS8  | 3.373  | 3.23  |
| INTU   | 3.238  | 0     |
| INVS   | 4.088  | 1.88  |
| IPMK   | 1.797  | 0.66  |
| IPO11  | 4.866  | 3.9   |
| IPO13  | 3.593  | 1.81  |
| IPO4   | 3.6    | 6.76  |
| IPO7   | 3.754  | 5.56  |
| IPO8   | 5.156  | 2.19  |
| IPO9   | 3.126  | 3.42  |
| IPP    | 3.053  | 0.04  |
| IPPK   | 4.401  | 1.55  |
| IPW    | 0.1    | 0     |
| IQCA   | 3.188  | 0     |
| IQCB1  | 2.766  | 7.65  |
| IQCC   | 2.017  | 0.88  |
| IQCD   | 1.35   | 0.07  |
| IQCE   | 6.535  | 1.54  |
| IQCF1  | 0.695  | 0     |
| IQCF2  | 0.587  | 0     |
| IQCF3  | 1.687  | 0     |
| IQCG   | 2.244  | 0.61  |
| IQCH   | 4.823  | 0.06  |
| IQCK   | 2.554  | 0.43  |
| IQGAP1 | 8.15   | 19.82 |
| IQGAP2 | 5.767  | 2.04  |
| IQGAP3 | 6.052  | 2.37  |
| IQSEC1 | 5.818  | 17.11 |

|          |       |       |
|----------|-------|-------|
| IQSEC2   | 5.62  | 2.22  |
| IQSEC3   | 2.699 | 0.04  |
| IQUB     | 5.112 | 0     |
| IQWD1    | 3.293 | 3.06  |
| IRAK1    | 3.872 | 14.92 |
| IRAK1BP1 | 1.157 | 0     |
| IRAK2    | 3.469 | 0.57  |
| IRAK3    | 2.567 | 20.31 |
| IRAK4    | 2.813 | 4.68  |
| IREB2    | 3.928 | 9.45  |
| IRF1     | 2.935 | 46.18 |
| IRF2     | 2.224 | 5.65  |
| IRF2BP1  | 2.511 | 2.68  |
| IRF2BP2  | 3.35  | 36.24 |
| IRF3     | 1.595 | 29.03 |
| IRF4     | 5.056 | 3.89  |
| IRF5     | 6.302 | 0.43  |
| IRF6     | 2.17  | 0     |
| IRF7     | 2.59  | 2.98  |
| IRF8     | 3.997 | 44.24 |
| IRGC     | 1.586 | 0     |
| IRGM     | 0.546 | 0.91  |
| IRGQ     | 2.484 | 7.45  |
| IRS1     | 5.8   | 2.34  |
| IRS2     | 7.68  | 28.82 |
| IRS3L    | 9.347 | 1.95  |
| IRS4     | 3.94  | 0     |
| IRX1     | 1.858 | 0     |
| IRX1P1   | 8.386 | 0     |
| IRX2     | 2.456 | 0     |
| IRX3     | 2.308 | 0     |
| IRX4     | 2.213 | 0     |
| IRX5     | 2.064 | 0     |
| IRX6     | 2.329 | 0     |
| ISCA1    | 2.004 | 5.14  |
| ISCA2    | 0.942 | 9.77  |
| ISCU     | 1.198 | 16.27 |
| ISG15    | 0.634 | 4.21  |
| ISG20    | 2.284 | 38.47 |
| ISG20L1  | 3.054 | 10.3  |
| ISG20L2  | 2.051 | 4.15  |
| ISGF3G   | 1.99  | 14.67 |
| ISL1     | 2.396 | 0     |
| ISL2     | 1.798 | 0.05  |
| ISLR     | 2.385 | 0.2   |
| ISLR2    | 4.184 | 0.14  |
| ISOC1    | 2.054 | 0.24  |
| ISOC2    | 1.122 | 1.94  |
| ISX      | 3.383 | 0     |
| ISY1     | 1.758 | 14.63 |



|          |        |       |
|----------|--------|-------|
| ISYNA1   | 1.825  | 3.58  |
| ITCH     | 6.357  | 16.15 |
| ITFG1    | 2.234  | 4.12  |
| ITFG2    | 2.155  | 5.37  |
| ITFG3    | 2.921  | 5.08  |
| ITGA1    | 4.796  | 0.06  |
| ITGA10   | 5.17   | 2.36  |
| ITGA11   | 6.334  | 0.12  |
| ITGA2    | 5.349  | 0.05  |
| ITGA2B   | 3.334  | 0.2   |
| ITGA3    | 6.002  | 0.02  |
| ITGA4    | 8.64   | 37.85 |
| ITGA5    | 5.395  | 90.46 |
| ITGA6    | 12.095 | 62.05 |
| ITGA7    | 4.065  | 0.34  |
| ITGA8    | 3.261  | 0     |
| ITGA9    | 4.876  | 11.53 |
| ITGAD    | 3.912  | 0.03  |
| ITGAE    | 3.866  | 2.23  |
| ITGAL    | 5.121  | 7.98  |
| ITGAM    | 4.742  | 2.61  |
| ITGAV    | 7.022  | 1.27  |
| ITGAX    | 4.649  | 2.64  |
| ITGB1    | 6.55   | 28.06 |
| ITGB1BP1 | 1.423  | 5.7   |
| ITGB1BP2 | 1.235  | 1.6   |
| ITGB1BP3 | 1.244  | 0     |
| ITGB2    | 2.868  | 26.39 |
| ITGB3    | 4.894  | 0     |
| ITGB3BP  | 0.879  | 3.04  |
| ITGB4    | 6.086  | 0.2   |
| ITGB4BP  | 2.074  | 17.51 |
| ITGB5    | 3.372  | 0.23  |
| ITGB6    | 2.397  | 0     |
| ITGB7    | 2.771  | 9.82  |
| ITGB8    | 17.553 | 0     |
| ITGBL1   | 2.494  | 0     |
| ITIH1    | 2.911  | 0.04  |
| ITIH2    | 3.189  | 0.06  |
| ITIH3    | 2.797  | 1.7   |
| ITIH4    | 3.26   | 5.04  |
| ITIH5    | 7.384  | 0.03  |
| ITIH5L   | 4.684  | 0     |
| ITK      | 4.366  | 2.11  |
| ITLN1    | 1.182  | 0     |
| ITLN2    | 1.15   | 0.09  |
| ITM2A    | 1.832  | 1.79  |
| ITM2B    | 2.112  | 222.8 |
| ITM2C    | 2.073  | 5.2   |
| ITPA     | 1.14   | 9.38  |

|          |        |       |
|----------|--------|-------|
| ITPK1    | 3.197  | 8.51  |
| ITPKA    | 1.773  | 0.12  |
| ITPKB    | 6.151  | 9.89  |
| ITPKC    | 3.385  | 0.47  |
| ITPR1    | 13.031 | 22.01 |
| ITPR2    | 10.523 | 1.16  |
| ITPR3    | 8.834  | 5.76  |
| ITSN1    | 7.951  | 0.5   |
| ITSN2    | 8.249  | 13.5  |
| IVD      | 2.49   | 6.32  |
| IVL      | 2.135  | 0     |
| IVNS1ABP | 8.456  | 32.65 |
| IWS1     | 2.95   | 9.36  |
| IXL      | 3.567  | 8.71  |
| IYD      | 7.401  | 0     |
| IZUMO1   | 1.621  | 0     |
| JAG1     | 5.881  | 0.17  |
| JAG2     | 5.077  | 0.39  |
| JAGN1    | 1.655  | 7.06  |
| JAK1     | 5.286  | 26.35 |
| JAK2     | 5.097  | 2.79  |
| JAK3     | 4.025  | 6.29  |
| JAKMIP1  | 2.549  | 0.08  |
| JAKMIP2  | 3.338  | 0.03  |
| JAM2     | 1.693  | 0     |
| JAM3     | 3.667  | 0.29  |
| JARID1A  | 7.024  | 25.25 |
| JARID1B  | 6.458  | 13.4  |
| JARID1C  | 6.493  | 24.73 |
| JARID1D  | 5.487  | 17.66 |
| JARID2   | 14.431 | 32.15 |
| JAZF1    | 6.4    | 0.16  |
| JDP2     | 1.696  | 33.77 |
| JMJD1A   | 4.718  | 24.79 |
| JMJD1B   | 6.813  | 14.57 |
| JMJD1C   | 10.104 | 45.34 |
| JMJD2A   | 4.417  | 8     |
| JMJD2B   | 5.943  | 13.98 |
| JMJD2C   | 4.227  | 4.1   |
| JMJD2D   | 2.974  | 0.2   |
| JMJD3    | 6.704  | 3.38  |
| JMJD4    | 2.55   | 8.22  |
| JMJD5    | 2.416  | 1.1   |
| JMJD6    | 1.84   | 13.01 |
| JMY      | 2.677  | 11.39 |
| JOSD1    | 3.52   | 29.73 |
| JOSD2    | 0.769  | 2.32  |
| JOSD3    | 2.722  | 43.43 |
| JPH1     | 4.373  | 0.09  |
| JPH2     | 5.941  | 0.1   |

|         |       |        |
|---------|-------|--------|
| JPH3    | 3.997 | 0      |
| JPH4    | 4.386 | 3.05   |
| JRK     | 3.98  | 0.32   |
| JRKL    | 2.914 | 0.44   |
| JSRP1   | 1.107 | 0      |
| JTB     | 1.574 | 29.04  |
| JTV1    | 2.438 | 2.8    |
| JUB     | 4.946 | 0.02   |
| JUN     | 3.323 | 53.56  |
| JUNB    | 1.816 | 73.27  |
| JUND    | 1.899 | 541.94 |
| JUP     | 4.323 | 72.32  |
| KAAG1   | 1.382 | 0      |
| KAL1    | 6.314 | 0.02   |
| KALP    | 0.184 | 0      |
| KALRN   | 12.55 | 2.88   |
| KARCA1  | 2.485 | 0      |
| KARS    | 1.997 | 33.68  |
| KATNA1  | 1.521 | 4.68   |
| KATNAL1 | 8.215 | 6.07   |
| KATNAL2 | 1.882 | 0.68   |
| KATNB1  | 2.646 | 4.83   |
| KAZALD1 | 3.988 | 15.75  |
| KBTBD10 | 2.464 | 0      |
| KBTBD11 | 6.71  | 3.14   |
| KBTBD2  | 7.216 | 16.47  |
| KBTBD3  | 3.952 | 0.2    |
| KBTBD4  | 3.245 | 13.35  |
| KBTBD5  | 2.419 | 0      |
| KBTBD6  | 5.228 | 0.7    |
| KBTBD7  | 2.992 | 1.12   |
| KBTBD8  | 4.617 | 2.52   |
| KC6     | 1.713 | 0      |
| KCMF1   | 2.39  | 21.45  |
| KCNA1   | 1.488 | 0      |
| KCNA10  | 1.959 | 0      |
| KCNA2   | 2.125 | 0      |
| KCNA3   | 3.346 | 1.07   |
| KCNA4   | 3.613 | 0.03   |
| KCNA5   | 2.865 | 9.19   |
| KCNA6   | 4.237 | 0.05   |
| KCNA7   | 4.372 | 0      |
| KCNAB1  | 6.73  | 0.04   |
| KCNAB2  | 3.171 | 9.42   |
| KCNAB3  | 1.608 | 0.92   |
| KCNB1   | 3.756 | 0      |
| KCNB2   | 3.582 | 0      |
| KCNC1   | 1.546 | 0      |
| KCNC2   | 3.654 | 0      |
| KCNC3   | 4.096 | 5.65   |

|        |        |       |
|--------|--------|-------|
| KCNC4  | 5.954  | 0.02  |
| KCND1  | 4.72   | 1.56  |
| KCND2  | 10.666 | 0     |
| KCND3  | 2.693  | 0     |
| KCNE1  | 3.57   | 0.11  |
| KCNE1L | 1.465  | 0.07  |
| KCNE2  | 0.803  | 0     |
| KCNE3  | 2.519  | 10.37 |
| KCNE4  | 1.17   | 0     |
| KCNF1  | 2.289  | 0     |
| KCNG1  | 4.096  | 0     |
| KCNG2  | 1.401  | 0.07  |
| KCNG3  | 4.456  | 0     |
| KCNG4  | 3.759  | 0     |
| KCNH1  | 3.601  | 0     |
| KCNH2  | 10.67  | 0.02  |
| KCNH3  | 3.853  | 0.08  |
| KCNH4  | 3.92   | 0     |
| KCNH5  | 5.196  | 0     |
| KCNH6  | 3.881  | 0.03  |
| KCNH7  | 4.514  | 0     |
| KCNH8  | 5.063  | 0.02  |
| KCNIP1 | 2.127  | 0.04  |
| KCNIP2 | 4.472  | 0.31  |
| KCNIP3 | 3.017  | 0     |
| KCNIP4 | 2.925  | 0.1   |
| KCNJ1  | 4.109  | 0     |
| KCNJ10 | 4.44   | 0     |
| KCNJ11 | 3.412  | 0     |
| KCNJ12 | 1.796  | 0     |
| KCNJ13 | 2.947  | 0.23  |
| KCNJ14 | 3.525  | 0.87  |
| KCNJ15 | 3.156  | 0.1   |
| KCNJ16 | 4.409  | 0     |
| KCNJ2  | 5.388  | 0.02  |
| KCNJ3  | 2.89   | 0     |
| KCNJ4  | 2.121  | 0     |
| KCNJ5  | 2.912  | 0     |
| KCNJ6  | 2.485  | 0     |
| KCNJ8  | 2.381  | 0     |
| KCNJ9  | 3.029  | 0     |
| KCNK1  | 1.887  | 0     |
| KCNK10 | 3.139  | 0     |
| KCNK12 | 1.425  | 7.15  |
| KCNK13 | 2.517  | 0.08  |
| KCNK15 | 1.246  | 0     |
| KCNK16 | 1.226  | 0     |
| KCNK17 | 1.52   | 0.26  |
| KCNK18 | 1.155  | 0     |
| KCNK2  | 3.695  | 0     |

|          |        |       |
|----------|--------|-------|
| KCNK3    | 2.592  | 1.26  |
| KCNK4    | 1.81   | 0     |
| KCNK5    | 3.783  | 0.11  |
| KCNK6    | 2.662  | 0.15  |
| KCNK7    | 3.346  | 0.47  |
| KCNK9    | 1.303  | 0     |
| KCNMA1   | 14.632 | 0.02  |
| KCNMB1   | 1.517  | 0.59  |
| KCNMB2   | 2.775  | 0     |
| KCNMB3   | 3.904  | 1.4   |
| KCNMB3L  | 1.94   | 0.25  |
| KCNMB4   | 1.631  | 0.06  |
| KCNN1    | 2.657  | 0.04  |
| KCNN2    | 3.057  | 0     |
| KCNN3    | 3.228  | 0.68  |
| KCNN4    | 2.24   | 2.04  |
| KCNQ1    | 3.762  | 0.16  |
| KCNQ1DN  | 1.093  | 0     |
| KCNQ1OT1 | 0.592  | 0     |
| KCNQ2    | 4.169  | 0     |
| KCNQ3    | 3.097  | 0     |
| KCNQ4    | 2.335  | 0.12  |
| KCNQ5    | 3.325  | 0     |
| KCNRG    | 2.334  | 1.1   |
| KCNS1    | 4.539  | 0     |
| KCNS2    | 3.168  | 0.04  |
| KCNS3    | 2.33   | 17.71 |
| KCNT1    | 4.823  | 0     |
| KCNT2    | 5.909  | 0     |
| KCNV1    | 2.929  | 0     |
| KCNV2    | 1.882  | 0     |
| KCTD1    | 1.747  | 0     |
| KCTD10   | 3.97   | 9.07  |
| KCTD11   | 2.78   | 0     |
| KCTD12   | 6.214  | 0.92  |
| KCTD13   | 1.711  | 6.02  |
| KCTD14   | 1.637  | 0     |
| KCTD15   | 3.398  | 2.56  |
| KCTD16   | 5.183  | 0     |
| KCTD17   | 1.854  | 9.5   |
| KCTD18   | 2.94   | 6.46  |
| KCTD2    | 3.698  | 4.18  |
| KCTD20   | 5.216  | 10.38 |
| KCTD21   | 3.381  | 0.03  |
| KCTD3    | 4.016  | 18.35 |
| KCTD4    | 1.865  | 0.11  |
| KCTD5    | 2.46   | 4.9   |
| KCTD6    | 1.825  | 1.3   |
| KCTD7    | 5.15   | 3.23  |
| KCTD8    | 2.24   | 0     |

|          |       |       |
|----------|-------|-------|
| KCTD9    | 3.338 | 2.04  |
| KDELC1   | 2.06  | 0.04  |
| KDELC2   | 4.255 | 1.31  |
| KDELR1   | 1.557 | 28.21 |
| KDELR2   | 2.306 | 5.1   |
| KDELR3   | 2.127 | 0.19  |
| KDR      | 5.832 | 0     |
| KEAP1    | 2.701 | 4.91  |
| KEL      | 5.095 | 0.08  |
| KERA     | 2.533 | 0     |
| KGFLP1   | 1.89  | 0     |
| KGFLP2   | 3.666 | 0     |
| KHDRBS1  | 2.685 | 38.88 |
| KHDRBS2  | 2.332 | 0.04  |
| KHDRBS3  | 1.957 | 6.77  |
| KHK      | 2.027 | 0.04  |
| KHSRP    | 4.002 | 25.41 |
| KIAA0020 | 2.112 | 3.84  |
| KIAA0040 | 4.564 | 13.27 |
| KIAA0082 | 4.464 | 16.44 |
| KIAA0090 | 4.238 | 3.22  |
| KIAA0100 | 7.431 | 11.26 |
| KIAA0101 | 2.586 | 1.08  |
| KIAA0125 | 7.899 | 0.14  |
| KIAA0133 | 5.613 | 0.61  |
| KIAA0141 | 3.039 | 13.45 |
| KIAA0143 | 5.313 | 11.51 |
| KIAA0146 | 3.22  | 2.18  |
| KIAA0152 | 6.349 | 4.28  |
| KIAA0157 | 2.951 | 5.83  |
| KIAA0174 | 3.552 | 95.4  |
| KIAA0179 | 5.087 | 2.65  |
| KIAA0182 | 7.395 | 9.02  |
| KIAA0195 | 4.985 | 9.88  |
| KIAA0196 | 3.911 | 4.78  |
| KIAA0226 | 7.009 | 10.27 |
| KIAA0232 | 7.84  | 3.52  |
| KIAA0240 | 6.515 | 1.11  |
| KIAA0241 | 4.706 | 1.49  |
| KIAA0247 | 5.614 | 19.85 |
| KIAA0251 | 4.495 | 12.08 |
| KIAA0256 | 6.779 | 25.55 |
| KIAA0258 | 1.296 | 2.29  |
| KIAA0265 | 8.942 | 1.32  |
| KIAA0274 | 3.061 | 0.68  |
| KIAA0284 | 6.549 | 0.11  |
| KIAA0286 | 5.37  | 1.97  |
| KIAA0310 | 9.319 | 9.87  |
| KIAA0317 | 5.445 | 21.38 |
| KIAA0319 | 6.805 | 0     |

|           |        |       |
|-----------|--------|-------|
| KIAA0319L | 7.376  | 3.68  |
| KIAA0323  | 7.128  | 28.5  |
| KIAA0329  | 8.607  | 0.36  |
| KIAA0350  | 7.02   | 2.51  |
| KIAA0355  | 6.622  | 2.44  |
| KIAA0363  | 10.771 | 0.11  |
| KIAA0367  | 11.705 | 0.76  |
| KIAA0368  | 7.391  | 7.35  |
| KIAA0372  | 5.164  | 8.39  |
| KIAA0391  | 2.954  | 7.97  |
| KIAA0404  | 8.389  | 27.45 |
| KIAA0406  | 3.914  | 1.52  |
| KIAA0408  | 6.449  | 0.02  |
| KIAA0409  | 1.674  | 8.86  |
| KIAA0415  | 5.78   | 5.88  |
| KIAA0423  | 6.242  | 1.3   |
| KIAA0427  | 5.736  | 2.53  |
| KIAA0430  | 8.349  | 12.01 |
| KIAA0460  | 5.638  | 10.12 |
| KIAA0467  | 10.217 | 5.33  |
| KIAA0492  | 6.259  | 0.44  |
| KIAA0494  | 5.765  | 5.7   |
| KIAA0495  | 4.033  | 2.23  |
| KIAA0513  | 7.361  | 0.43  |
| KIAA0523  | 5.821  | 0.02  |
| KIAA0528  | 4.408  | 5.16  |
| KIAA0556  | 6.618  | 2.47  |
| KIAA0562  | 5.846  | 1.46  |
| KIAA0586  | 4.966  | 0.76  |
| KIAA0644  | 9.917  | 0.04  |
| KIAA0649  | 4.932  | 0.12  |
| KIAA0652  | 4.183  | 27.88 |
| KIAA0664  | 5.224  | 5.48  |
| KIAA0672  | 4.228  | 0.14  |
| KIAA0692  | 6.321  | 34.18 |
| KIAA0701  | 5.437  | 2.05  |
| KIAA0737  | 4.988  | 13.98 |
| KIAA0738  | 8.152  | 0.56  |
| KIAA0746  | 4.383  | 1.54  |
| KIAA0748  | 3.673  | 2.35  |
| KIAA0753  | 4.424  | 0.78  |
| KIAA0754  | 6.171  | 0.28  |
| KIAA0773  | 18.486 | 0.02  |
| KIAA0774  | 5.193  | 0.78  |
| KIAA0776  | 4.408  | 8.73  |
| KIAA0789  | 4.636  | 0     |
| KIAA0802  | 7.427  | 7.78  |
| KIAA0828  | 10.669 | 2.02  |
| KIAA0831  | 4.742  | 15.4  |
| KIAA0841  | 4.004  | 5.64  |

|           |        |       |
|-----------|--------|-------|
| KIAA0859  | 4.834  | 1.35  |
| KIAA0892  | 3.986  | 15.69 |
| KIAA0895  | 8.31   | 0.01  |
| KIAA0907  | 2.945  | 12.1  |
| KIAA0913  | 4.329  | 21.19 |
| KIAA0922  | 5.209  | 18.56 |
| KIAA0947  | 8.577  | 3.67  |
| KIAA0953  | 4.218  | 0.14  |
| KIAA0984  | 8.019  | 0     |
| KIAA0999  | 6.069  | 6.04  |
| KIAA1005  | 5.297  | 0.32  |
| KIAA1009  | 5.051  | 0.6   |
| KIAA1012  | 5.465  | 4.19  |
| KIAA1024  | 6.717  | 0.02  |
| KIAA1026  | 2.891  | 0     |
| KIAA1033  | 6.679  | 18.86 |
| KIAA1045  | 6.191  | 0     |
| KIAA1086  | 4.768  | 0     |
| KIAA1109  | 15.575 | 3.26  |
| KIAA1128  | 7.676  | 3.14  |
| KIAA1143  | 0.832  | 11.18 |
| KIAA1147  | 14.592 | 5.07  |
| KIAA1155  | 6.208  | 0.19  |
| KIAA1161  | 4.171  | 0.1   |
| KIAA1166  | 2.156  | 9.23  |
| KIAA1189  | 5.428  | 19.05 |
| KIAA1191  | 2.786  | 4.48  |
| KIAA1199  | 7.08   | 0.31  |
| KIAA1212  | 9.638  | 7.04  |
| KIAA1217  | 7.381  | 0.03  |
| KIAA1219  | 8.636  | 5.16  |
| KIAA1239  | 7.477  | 0     |
| KIAA1244  | 8.658  | 0     |
| KIAA1257  | 6.094  | 0.02  |
| KIAA1267  | 4.965  | 23.57 |
| KIAA1274  | 4.568  | 10.98 |
| KIAA1276  | 4.236  | 1.45  |
| KIAA1279  | 2.528  | 0.94  |
| KIAA1303  | 6.856  | 3.93  |
| KIAA1305  | 7.857  | 0.57  |
| KIAA1324  | 3.398  | 0.09  |
| KIAA1324L | 6.56   | 0.03  |
| KIAA1328  | 4.854  | 0.51  |
| KIAA1333  | 5.533  | 1.93  |
| KIAA1344  | 4.552  | 1.32  |
| KIAA1345  | 4.89   | 0.1   |
| KIAA1370  | 6.365  | 11.84 |
| KIAA1377  | 7.033  | 0.05  |
| KIAA1383  | 5.455  | 1.27  |
| KIAA1394  | 5.067  | 0.62  |



|          |        |       |
|----------|--------|-------|
| KIAA1407 | 3.976  | 0.87  |
| KIAA1409 | 8.471  | 0.08  |
| KIAA1411 | 5.282  | 0.45  |
| KIAA1429 | 6.538  | 6.67  |
| KIAA1430 | 2.895  | 1.06  |
| KIAA1432 | 5.674  | 19.72 |
| KIAA1446 | 2.673  | 0.67  |
| KIAA1456 | 5.752  | 0     |
| KIAA1462 | 13.553 | 1.12  |
| KIAA1467 | 4.711  | 0.36  |
| KIAA1468 | 3.396  | 6.23  |
| KIAA1486 | 4.828  | 0     |
| KIAA1505 | 6.666  | 0.11  |
| KIAA1509 | 7.965  | 17.31 |
| KIAA1522 | 5.294  | 1.05  |
| KIAA1524 | 3.378  | 0.61  |
| KIAA1529 | 6.269  | 0.08  |
| KIAA1530 | 4.56   | 4.54  |
| KIAA1539 | 3.028  | 2.12  |
| KIAA1542 | 5.521  | 13.41 |
| KIAA1543 | 4.084  | 0     |
| KIAA1545 | 4.913  | 19.82 |
| KIAA1546 | 9.233  | 2.84  |
| KIAA1549 | 13.602 | 0.02  |
| KIAA1553 | 6.01   | 0.74  |
| KIAA1571 | 10.162 | 0.02  |
| KIAA1576 | 3.769  | 0.05  |
| KIAA1586 | 2.868  | 1.24  |
| KIAA1598 | 3.415  | 0     |
| KIAA1600 | 5.69   | 20.8  |
| KIAA1604 | 3.145  | 4.44  |
| KIAA1609 | 3.895  | 0.61  |
| KIAA1614 | 6.999  | 0.09  |
| KIAA1618 | 5.318  | 1.88  |
| KIAA1622 | 4.322  | 0     |
| KIAA1627 | 2.12   | 5.7   |
| KIAA1632 | 12.698 | 6.76  |
| KIAA1639 | 5.337  | 0.31  |
| KIAA1641 | 2.405  | 2.22  |
| KIAA1644 | 6.741  | 0     |
| KIAA1666 | 6.105  | 0     |
| KIAA1683 | 3.757  | 4.48  |
| KIAA1688 | 5.146  | 0.02  |
| KIAA1704 | 1.393  | 3.77  |
| KIAA1706 | 9.374  | 0.36  |
| KIAA1712 | 4.503  | 1.01  |
| KIAA1715 | 5.765  | 0.67  |
| KIAA1718 | 18.356 | 1.14  |
| KIAA1727 | 6.47   | 0.06  |
| KIAA1729 | 6.936  | 2.41  |

|           |        |       |
|-----------|--------|-------|
| KIAA1737  | 4.348  | 6.41  |
| KIAA1751  | 4.71   | 0     |
| KIAA1754  | 5.119  | 24.32 |
| KIAA1754L | 4.585  | 2.74  |
| KIAA1772  | 4.949  | 0     |
| KIAA1787  | 5.357  | 2.42  |
| KIAA1794  | 4.569  | 3.16  |
| KIAA1797  | 6.095  | 0.13  |
| KIAA1799  | 2.106  | 0.84  |
| KIAA1804  | 4.666  | 0.06  |
| KIAA1815  | 5.341  | 1.23  |
| KIAA1822  | 2.238  | 0     |
| KIAA1822L | 2.504  | 0     |
| KIAA1826  | 4.087  | 1.74  |
| KIAA1833  | 3.808  | 1.27  |
| KIAA1840  | 7.788  | 3.56  |
| KIAA1841  | 3.116  | 0.48  |
| KIAA1853  | 8.382  | 0     |
| KIAA1856  | 10.622 | 1.47  |
| KIAA1875  | 5.187  | 1     |
| KIAA1881  | 6.353  | 0.76  |
| KIAA1909  | 11.507 | 0.23  |
| KIAA1913  | 5.023  | 0.04  |
| KIAA1919  | 2.079  | 0.57  |
| KIAA1920  | 8.555  | 0.01  |
| KIAA1922  | 1.248  | 2.14  |
| KIAA1946  | 3.557  | 0     |
| KIAA1949  | 10.736 | 0.84  |
| KIAA1957  | 3.24   | 0.03  |
| KIAA1958  | 2.683  | 0.92  |
| KIAA1967  | 4.346  | 20.67 |
| KIAA1975  | 3.182  | 0     |
| KIAA1984  | 1.704  | 1.68  |
| KIAA2002  | 11.249 | 4.12  |
| KIAA2013  | 2.341  | 4.61  |
| KIAA2018  | 9.429  | 5.89  |
| KIAA2026  | 4.673  | 1.84  |
| KIDINS220 | 7.263  | 8.95  |
| KIF11     | 4.91   | 1.25  |
| KIF12     | 2.003  | 0     |
| KIF13A    | 5.852  | 0.3   |
| KIF13B    | 11.082 | 5.96  |
| KIF14     | 6.595  | 0.35  |
| KIF15     | 4.758  | 0.42  |
| KIF17     | 3.969  | 0.03  |
| KIF18A    | 3.361  | 0.88  |
| KIF19     | 2.094  | 0.1   |
| KIF1A     | 8.816  | 0     |
| KIF1B     | 14.126 | 3.18  |
| KIF1C     | 4.188  | 2.79  |

|          |        |       |
|----------|--------|-------|
| KIF20A   | 2.961  | 0.8   |
| KIF21A   | 6.328  | 0.04  |
| KIF21B   | 9.895  | 1.84  |
| KIF22    | 2.096  | 6.98  |
| KIF23    | 3.618  | 0.66  |
| KIF25    | 1.51   | 0     |
| KIF26A   | 7.237  | 0.75  |
| KIF26B   | 8.365  | 0.07  |
| KIF27    | 4.653  | 0.56  |
| KIF2A    | 2.872  | 7.79  |
| KIF2B    | 2.312  | 0     |
| KIF2C    | 2.797  | 1.52  |
| KIF3A    | 6.257  | 0.11  |
| KIF3B    | 6.103  | 2.09  |
| KIF3C    | 5.379  | 2.03  |
| KIF4A    | 4.348  | 0.28  |
| KIF5A    | 3.897  | 0     |
| KIF5B    | 4.293  | 16.96 |
| KIF5C    | 0.704  | 0     |
| KIF6     | 2.917  | 0     |
| KIF7     | 3.121  | 1.64  |
| KIF9     | 3.403  | 1.19  |
| KIFAP3   | 2.997  | 3.04  |
| KIFC1    | 4.708  | 1.11  |
| KIFC2    | 3.248  | 7.43  |
| KIFC3    | 3.366  | 5.29  |
| KIN      | 1.906  | 2.54  |
| KIR2DL1  | 1.583  | 0     |
| KIR2DL2  | 1.572  | 0     |
| KIR2DL3  | 1.896  | 0.05  |
| KIR2DL4  | 1.581  | 0     |
| KIR2DL5A | 1.596  | 0     |
| KIR2DL5B | 1.632  | 0     |
| KIR2DP1  | 4.557  | 0     |
| KIR2DS1  | 1.101  | 0     |
| KIR2DS2  | 1.557  | 0     |
| KIR2DS3  | 1.113  | 0     |
| KIR2DS4  | 2.246  | 0     |
| KIR2DS5  | 1.457  | 0     |
| KIR3DL1  | 1.861  | 0     |
| KIR3DL2  | 1.854  | 0.11  |
| KIR3DL3  | 1.691  | 0     |
| KIR3DP1  | 0.1    | 0     |
| KIR3DX1  | 11.432 | 0.05  |
| KIRREL   | 3.309  | 1.73  |
| KIRREL2  | 3.133  | 0.04  |
| KIRREL3  | 2.495  | 0.04  |
| KISS1    | 0.709  | 0     |
| KISS1R   | 1.607  | 0     |
| KIT      | 5.084  | 0.23  |

|         |        |        |
|---------|--------|--------|
| KITLG   | 5.435  | 0      |
| KL      | 8.714  | 0.04   |
| KLB     | 3.279  | 0      |
| KLC1    | 7.373  | 15.24  |
| KLC2    | 2.916  | 0.92   |
| KLC3    | 1.793  | 0.22   |
| KLC4    | 3.555  | 4.15   |
| KLF1    | 1.615  | 0.43   |
| KLF10   | 4.575  | 17.76  |
| KLF11   | 4.03   | 5.16   |
| KLF12   | 11.614 | 0.38   |
| KLF13   | 6.8    | 106.08 |
| KLF14   | 2.767  | 0      |
| KLF15   | 2.525  | 0.39   |
| KLF16   | 2.887  | 8.12   |
| KLF17   | 3.131  | 0      |
| KLF2    | 2.035  | 257.18 |
| KLF3    | 6.564  | 45.29  |
| KLF4    | 2.639  | 17.51  |
| KLF5    | 3.35   | 0.09   |
| KLF6    | 4.521  | 72.56  |
| KLF7    | 10.632 | 34.14  |
| KLF8    | 2.544  | 2.77   |
| KLF9    | 5.208  | 65.64  |
| KLHDC1  | 2.627  | 0.57   |
| KLHDC2  | 1.806  | 34.24  |
| KLHDC3  | 2.387  | 36.1   |
| KLHDC4  | 1.874  | 7.65   |
| KLHDC5  | 6.469  | 2.63   |
| KLHDC6  | 4.121  | 0      |
| KLHDC7A | 2.434  | 0      |
| KLHDC7B | 2.082  | 0      |
| KLHDC8A | 2.5    | 0      |
| KLHDC8B | 1.935  | 0.46   |
| KLHL1   | 3.984  | 0      |
| KLHL10  | 1.969  | 0      |
| KLHL11  | 2.326  | 0.89   |
| KLHL12  | 3.338  | 5.04   |
| KLHL13  | 3.125  | 0.04   |
| KLHL14  | 4.261  | 1.77   |
| KLHL15  | 2.62   | 12.04  |
| KLHL17  | 2.56   | 0.62   |
| KLHL18  | 4.616  | 3.68   |
| KLHL2   | 5.813  | 54.02  |
| KLHL20  | 3.464  | 6.91   |
| KLHL21  | 4.487  | 3.75   |
| KLHL22  | 2.568  | 2.2    |
| KLHL23  | 2.211  | 0.04   |
| KLHL24  | 9.309  | 38.42  |
| KLHL25  | 3.518  | 0.48   |

|        |        |       |
|--------|--------|-------|
| KLHL26 | 3.122  | 3.46  |
| KLHL28 | 2.028  | 1.9   |
| KLHL29 | 5.047  | 1.41  |
| KLHL3  | 6.49   | 2.73  |
| KLHL30 | 3.557  | 0     |
| KLHL31 | 1.905  | 0     |
| KLHL32 | 3.329  | 0     |
| KLHL34 | 2.84   | 0     |
| KLHL4  | 6.029  | 0     |
| KLHL5  | 4.021  | 15.95 |
| KLHL6  | 6.959  | 14.02 |
| KLHL7  | 9.232  | 0.3   |
| KLHL8  | 4.576  | 0.91  |
| KLHL9  | 4.352  | 4.25  |
| CLK1   | 0.874  | 0.34  |
| CLK10  | 1.661  | 0     |
| CLK11  | 1.441  | 0     |
| CLK12  | 1.677  | 0     |
| CLK13  | 1.258  | 0     |
| CLK14  | 1.133  | 0.18  |
| CLK15  | 2.932  | 0     |
| CLK2   | 7.498  | 0.05  |
| CLK3   | 3.489  | 0     |
| CLK4   | 1.347  | 0     |
| CLK5   | 1.495  | 0     |
| CLK6   | 2.542  | 0     |
| CLK7   | 1.971  | 0     |
| CLK8   | 1.515  | 0     |
| CLK9   | 1.438  | 0     |
| CLKB1  | 2.247  | 0     |
| KLkbl4 | 1.81   | 0     |
| CLKP1  | 15.428 | 0.01  |
| KLRA1  | 1.243  | 0.08  |
| KLRB1  | 0.74   | 3.74  |
| KLRC1  | 1.515  | 0     |
| KLRC2  | 1.221  | 0     |
| KLRC3  | 1.236  | 0.56  |
| KLRC4  | 0.965  | 0     |
| KLRD1  | 1.368  | 0.65  |
| KLRF1  | 1.242  | 0.24  |
| KLRG1  | 1.791  | 0     |
| KLRG2  | 3.088  | 0.04  |
| KLRK1  | 1.75   | 1.81  |
| KMO    | 4.987  | 0.39  |
| KNDC1  | 7.122  | 0.02  |
| KNG1   | 1.665  | 0     |
| KNTC1  | 6.965  | 2     |
| KPNA1  | 6.887  | 10.16 |
| KPNA2  | 1.98   | 10.19 |
| KPNA3  | 4.456  | 6.24  |

|          |        |       |
|----------|--------|-------|
| KPNA4    | 3.802  | 19.13 |
| KPNA5    | 2.158  | 2.84  |
| KPNA6    | 6.038  | 11.55 |
| KPNB1    | 4.201  | 32.92 |
| KPRP     | 2.523  | 0     |
| KPTN     | 1.64   | 1.81  |
| KRAS     | 10.087 | 10.78 |
| KRBA1    | 8.035  | 0.79  |
| KRBA2    | 1.964  | 0.15  |
| KRCC1    | 1.753  | 1.18  |
| KREMEN1  | 6.562  | 0.36  |
| KREMEN2  | 2.625  | 0     |
| KRIT1    | 12.456 | 0.98  |
| KRR1     | 3.659  | 8.03  |
| KRT1     | 2.507  | 0.24  |
| KRT10    | 2.124  | 5.82  |
| KRT12    | 1.867  | 0.11  |
| KRT121P  | 9.724  | 0     |
| KRT122P  | 4.517  | 0     |
| KRT123P  | 13.267 | 0     |
| KRT124P  | 5.18   | 0     |
| KRT126P  | 1.371  | 0     |
| KRT13    | 2.097  | 0     |
| KRT14    | 1.634  | 0     |
| KRT15    | 1.709  | 0     |
| KRT16    | 1.658  | 0     |
| KRT17    | 1.499  | 0     |
| KRT18    | 1.536  | 0     |
| KRT18L1  | 1.411  | 0     |
| KRT18P1  | 3.819  | 0     |
| KRT18P10 | 1.393  | 0     |
| KRT18P3  | 1.291  | 0     |
| KRT19    | 1.464  | 0     |
| KRT2     | 2.414  | 0     |
| KRT20    | 1.737  | 0     |
| KRT222P  | 1.048  | 0     |
| KRT223P  | 5.694  | 0     |
| KRT23    | 2.147  | 0     |
| KRT24    | 1.881  | 0     |
| KRT25    | 1.651  | 0     |
| KRT26    | 1.73   | 0     |
| KRT27    | 1.612  | 1.16  |
| KRT28    | 1.628  | 0.24  |
| KRT3     | 2.232  | 0     |
| KRT31    | 1.596  | 0     |
| KRT32    | 1.708  | 0     |
| KRT33A   | 1.252  | 0     |
| KRT33B   | 1.602  | 0     |
| KRT34    | 1.713  | 0     |
| KRT35    | 1.671  | 0     |

|            |       |      |
|------------|-------|------|
| KRT36      | 1.644 | 0    |
| KRT37      | 1.718 | 0    |
| KRT38      | 2.837 | 0    |
| KRT39      | 1.696 | 0    |
| KRT4       | 2.575 | 0.08 |
| KRT40      | 2.112 | 0    |
| KRT41P     | 6.661 | 0    |
| KRT42P     | 0.563 | 0    |
| KRT5       | 2.301 | 0    |
| KRT6A      | 2.27  | 0    |
| KRT6B      | 2.217 | 0    |
| KRT6C      | 1.984 | 0    |
| KRT6L      | 2.066 | 0    |
| KRT7       | 1.702 | 0.46 |
| KRT71      | 2.237 | 0    |
| KRT72      | 1.985 | 0.25 |
| KRT73      | 2.284 | 0.17 |
| KRT74      | 2.788 | 0    |
| KRT75      | 2.121 | 0    |
| KRT76      | 2.505 | 0    |
| KRT77      | 3.072 | 0    |
| KRT78      | 1.778 | 0    |
| KRT8       | 1.788 | 0.05 |
| KRT80      | 3.39  | 0    |
| KRT81      | 1.91  | 0    |
| KRT82      | 2.681 | 0    |
| KRT83      | 1.864 | 0    |
| KRT84      | 2.073 | 0    |
| KRT85      | 2.491 | 0    |
| KRT86      | 2.091 | 0    |
| KRT8L1     | 1.5   | 0    |
| KRT8L2     | 1.689 | 0.36 |
| KRT9       | 2.287 | 0    |
| KRTAP10-1  | 1.011 | 0    |
| KRTAP10-10 | 1.1   | 0    |
| KRTAP10-11 | 1.007 | 0    |
| KRTAP10-12 | 0.873 | 0    |
| KRTAP10-2  | 1.071 | 0    |
| KRTAP10-3  | 0.738 | 0    |
| KRTAP10-4  | 1.382 | 0    |
| KRTAP10-5  | 0.918 | 0    |
| KRTAP10-6  | 1.238 | 0    |
| KRTAP10-7  | 1.183 | 0    |
| KRTAP10-8  | 0.876 | 0    |
| KRTAP10-9  | 1.179 | 0    |
| KRTAP1-1   | 0.903 | 0    |
| KRTAP11-1  | 0.912 | 0    |
| KRTAP12-1  | 0.588 | 0    |
| KRTAP12-2  | 0.739 | 0    |
| KRTAP12-3  | 0.41  | 0    |

|           |       |      |
|-----------|-------|------|
| KRTAP12-4 | 0.447 | 0    |
| KRTAP1-3  | 0.972 | 0    |
| KRTAP13-1 | 0.582 | 0    |
| KRTAP13-2 | 0.823 | 0    |
| KRTAP13-3 | 0.52  | 0    |
| KRTAP13-4 | 0.483 | 0    |
| KRTAP13P1 | 0.3   | 0    |
| KRTAP13P2 | 0.101 | 0    |
| KRTAP1-5  | 1.177 | 0    |
| KRTAP15-1 | 0.453 | 0    |
| KRTAP17-1 | 0.779 | 0    |
| KRTAP19-1 | 0.273 | 0    |
| KRTAP19-2 | 0.159 | 0    |
| KRTAP19-3 | 0.494 | 0    |
| KRTAP19-4 | 0.255 | 0    |
| KRTAP19-5 | 0.219 | 0    |
| KRTAP19-6 | 0.33  | 0    |
| KRTAP19-7 | 0.192 | 0    |
| KRTAP19-8 | 0.318 | 0    |
| KRTAP19P1 | 0.203 | 0    |
| KRTAP19P2 | 0.252 | 0    |
| KRTAP19P3 | 0.231 | 0    |
| KRTAP19P4 | 0.135 | 0    |
| KRTAP20-1 | 0.171 | 0    |
| KRTAP20-2 | 0.198 | 0    |
| KRTAP2-1  | 0.791 | 0    |
| KRTAP21-1 | 0.24  | 0    |
| KRTAP21-2 | 0.252 | 0    |
| KRTAP2-2  | 0.883 | 0    |
| KRTAP22-1 | 0.147 | 0    |
| KRTAP23-1 | 0.208 | 0    |
| KRTAP2-4  | 0.764 | 0    |
| KRTAP24-1 | 0.765 | 0    |
| KRTAP26-1 | 1.159 | 0    |
| KRTAP27-1 | 0.624 | 0    |
| KRTAP2P1  | 0.401 | 0    |
| KRTAP3-1  | 0.594 | 0    |
| KRTAP3-2  | 0.694 | 0    |
| KRTAP3-3  | 0.704 | 0    |
| KRTAP3P1  | 0.24  | 0    |
| KRTAP4-10 | 0.739 | 0    |
| KRTAP4-12 | 1.077 | 0.09 |
| KRTAP4-14 | 1.18  | 0    |
| KRTAP4-15 | 1.209 | 0    |
| KRTAP4-2  | 0.763 | 0    |
| KRTAP4-3  | 0.942 | 0    |
| KRTAP4-4  | 1.079 | 0    |
| KRTAP4-5  | 0.879 | 0    |
| KRTAP4-7  | 1.149 | 0    |
| KRTAP4-8  | 1.134 | 0    |



|           |       |       |
|-----------|-------|-------|
| KRTAP4P1  | 0.708 | 0     |
| KRTAP5-1  | 0.942 | 0     |
| KRTAP5-10 | 1.058 | 0     |
| KRTAP5-11 | 0.882 | 0     |
| KRTAP5-2  | 1.118 | 0     |
| KRTAP5-3  | 0.899 | 0     |
| KRTAP5-4  | 0.927 | 0.11  |
| KRTAP5-6  | 0.561 | 0     |
| KRTAP5-7  | 0.898 | 0.11  |
| KRTAP5-8  | 0.584 | 0     |
| KRTAP5-9  | 1.024 | 0.1   |
| KRTAP6-1  | 0.219 | 0     |
| KRTAP6-2  | 0.189 | 0     |
| KRTAP6-3  | 0.616 | 0     |
| KRTAP7-1  | 0.695 | 0     |
| KRTAP8-1  | 0.556 | 0     |
| KRTAP8P1  | 0.123 | 0     |
| KRTAP8P2  | 0.111 | 0     |
| KRTAP9-2  | 1.005 | 0     |
| KRTAP9-3  | 0.992 | 0     |
| KRTAP9-4  | 0.967 | 0     |
| KRTAP9-5  | 0.861 | 0     |
| KRTAP9-8  | 0.526 | 0     |
| KRTAP9P1  | 0.525 | 0     |
| KRTCAP2   | 0.547 | 39.07 |
| KRTCAP3   | 0.857 | 1.39  |
| KRTHB4    | 1.777 | 1.22  |
| KRTHB5    | 0.514 | 6.16  |
| KSR1      | 4.491 | 1.28  |
| KSR2      | 2.49  | 0.48  |
| KTELC1    | 4.242 | 0.63  |
| KTI12     | 1.696 | 7.94  |
| KTN1      | 4.793 | 9.47  |
| Kua       | 2.187 | 6.47  |
| Kua-UEV   | 3.624 | 15.07 |
| KU-MEL-3  | 1.143 | 0     |
| KY        | 2.045 | 0     |
| KYNU      | 1.928 | 0.15  |
| L1CAM     | 4.525 | 0.02  |
| L1TD1     | 3.042 | 0     |
| L2HGDH    | 2.064 | 0.68  |
| L3MBTL    | 3.833 | 0.54  |
| L3MBTL2   | 4.43  | 1.92  |
| L3MBTL3   | 4.2   | 1.67  |
| L3MBTL4   | 4.525 | 0.15  |
| LACE1     | 2.262 | 0.13  |
| LACRT     | 0.508 | 0     |
| LACTB     | 2.282 | 1.25  |
| LACTB2    | 1.508 | 0.06  |
| LAD1      | 2.839 | 0     |

|            |        |         |
|------------|--------|---------|
| LAG3       | 1.99   | 0.75    |
| LAGE3      | 0.943  | 4.41    |
| LAIR1      | 4.049  | 63.06   |
| LAIR2      | 0.699  | 5.52    |
| LALBA      | 0.728  | 0       |
| LAMA1      | 9.515  | 0       |
| LAMA2      | 9.637  | 0       |
| LAMA3      | 10.68  | 1.62    |
| LAMA4      | 6.297  | 0       |
| LAMA5      | 11.426 | 0.31    |
| LAMB1      | 11.659 | 0.44    |
| LAMB2      | 5.808  | 9.95    |
| LAMB3      | 4.454  | 0.02    |
| LAMB4      | 11.708 | 0.03    |
| LAMC1      | 7.931  | 0.81    |
| LAMC2      | 6.155  | 0       |
| LAMC3      | 5.098  | 0       |
| LAMP1      | 3.26   | 43.61   |
| LAMP2      | 4.651  | 6.43    |
| LAMP3      | 3.297  | 0       |
| LANCL1     | 4.54   | 7.93    |
| LANCL2     | 8.706  | 1.93    |
| LANCL3     | 3.331  | 0.03    |
| LAP3       | 2.1    | 9.38    |
| LAPTM4A    | 1.7    | 53.02   |
| LAPTM4B    | 2.238  | 12.86   |
| LAPTM5     | 2.223  | 1354.14 |
| LARGE      | 4.194  | 8.94    |
| LARP1      | 7.458  | 8.57    |
| LARP2      | 6.247  | 0.87    |
| LARP4      | 6.634  | 1.41    |
| LARP5      | 5.64   | 7.87    |
| LARP6      | 2.343  | 0       |
| LARP7      | 1.437  | 5.64    |
| LARS       | 4.244  | 4.08    |
| LARS2      | 4.203  | 2.28    |
| LAS1L      | 2.466  | 16.81   |
| LASP1      | 3.845  | 15.52   |
| LASS1      | 2.094  | 0       |
| LASS1-GDF1 | 0.1    | 0       |
| LASS2      | 2.43   | 20.35   |
| LASS3      | 3.894  | 0       |
| LASS4      | 1.774  | 0.05    |
| LASS5      | 1.945  | 12.92   |
| LASS6      | 6.538  | 13.94   |
| LAT        | 2.037  | 1.99    |
| LAT1-3TM   | 0.615  | 1.77    |
| LAT2       | 4.62   | 10      |
| LATS1      | 4.755  | 4.97    |
| LATS2      | 5.589  | 12.85   |

|         |        |       |
|---------|--------|-------|
| LAX1    | 3.245  | 2.9   |
| LAYN    | 2.066  | 3.4   |
| LBA1    | 10.815 | 3.42  |
| LBH     | 2.928  | 10.99 |
| LBP     | 1.823  | 0     |
| LBR     | 5.413  | 25.61 |
| LBX1    | 1.285  | 0     |
| LBX2    | 1.452  | 0.14  |
| LBXCOR1 | 2.766  | 0.36  |
| LCAP    | 1.391  | 0     |
| LCAT    | 1.354  | 0.73  |
| LCE1A   | 0.333  | 0     |
| LCE1B   | 1.139  | 0     |
| LCE1C   | 0.695  | 0     |
| LCE1D   | 0.345  | 0     |
| LCE1E   | 1.18   | 0     |
| LCE1F   | 0.357  | 0     |
| LCE2A   | 0.592  | 0     |
| LCE2B   | 0.612  | 0     |
| LCE2C   | 0.614  | 0     |
| LCE2D   | 0.609  | 0     |
| LCE3A   | 0.27   | 0     |
| LCE3B   | 0.288  | 0     |
| LCE3C   | 0.285  | 0     |
| LCE3D   | 0.61   | 0     |
| LCE3E   | 0.611  | 0     |
| LCE4A   | 0.3    | 0     |
| LCE5A   | 0.819  | 0     |
| LCK     | 2.019  | 2.45  |
| LCMT1   | 1.37   | 9.32  |
| LCMT2   | 2.918  | 0.99  |
| LCN1    | 0.779  | 0     |
| LCN10   | 0.564  | 3.16  |
| LCN12   | 0.689  | 0.14  |
| LCN2    | 0.845  | 19.32 |
| LCN6    | 1.195  | 12.26 |
| LCN8    | 0.918  | 0.65  |
| LCN9    | 0.531  | 0     |
| LCOR    | 5.445  | 4.38  |
| LCORL   | 3.463  | 1     |
| LCP1    | 3.724  | 70.46 |
| LCP2    | 2.422  | 10.62 |
| LCT     | 6.274  | 0.02  |
| LCTL    | 2.016  | 0.2   |
| LDB1    | 3.824  | 42.38 |
| LDB2    | 2.443  | 0.28  |
| LDB3    | 4.714  | 10.74 |
| LDHA    | 1.661  | 64.09 |
| LDHAL1  | 1.644  | 0.24  |
| LDHAL4  | 1.665  | 4.81  |

|          |       |        |
|----------|-------|--------|
| LDHAL6A  | 2.526 | 0      |
| LDHAL6B  | 1.673 | 0      |
| LDHB     | 1.303 | 120.42 |
| LDHBP    | 1.004 | 18.33  |
| LDHC     | 1.33  | 0.29   |
| LDHD     | 2.267 | 0      |
| LDLR     | 5.174 | 3.87   |
| LDLRAD1  | 0.785 | 0      |
| LDLRAD2  | 4.012 | 1.26   |
| LDLRAD3  | 2.969 | 0      |
| LDLRAP1  | 2.845 | 8.31   |
| LDOC1    | 1.381 | 0.07   |
| LDOC1L   | 5.324 | 0.41   |
| LEAP2    | 1.856 | 0.53   |
| LECT1    | 1.66  | 0.24   |
| LECT2    | 1.077 | 0      |
| LEF1     | 14.59 | 52.71  |
| LEFTY1   | 1.616 | 0      |
| LEFTY2   | 2.019 | 0      |
| LEFTY3   | 0.297 | 0      |
| LELP1    | 0.523 | 0      |
| LEMD1    | 0.779 | 0      |
| LEMD2    | 3.943 | 16.09  |
| LEMD3    | 4.931 | 25.28  |
| LENEP    | 0.649 | 0      |
| LENG1    | 0.89  | 4.89   |
| LENG4    | 2.529 | 12.44  |
| LENG8    | 5.661 | 177.56 |
| LENG9    | 1.919 | 3.2    |
| LEO1     | 2.148 | 1.8    |
| LEP      | 6.852 | 0      |
| LEPR     | 7.663 | 2.93   |
| LEPRE1   | 3.192 | 8.27   |
| LEPREL1  | 3.404 | 0      |
| LEPREL2  | 2.892 | 0.34   |
| LEPROT   | 1.147 | 11.39  |
| LEPROTL1 | 2.682 | 10.96  |
| LETM1    | 3.908 | 2.31   |
| LETM2    | 1.631 | 0.97   |
| LETMD1   | 3.89  | 12.16  |
| LFNG     | 5.362 | 1.49   |
| LGALS1   | 0.558 | 8.51   |
| LGALS12  | 1.694 | 0.06   |
| LGALS13  | 0.595 | 0      |
| LGALS14  | 1.321 | 0      |
| LGALS2   | 0.528 | 0.75   |
| LGALS3   | 0.91  | 9.89   |
| LGALS3BP | 2.258 | 22.48  |
| LGALS4   | 1.117 | 0.71   |
| LGALS7   | 0.483 | 0      |

|         |        |       |
|---------|--------|-------|
| LGALS8  | 3.378  | 9.81  |
| LGALS9  | 1.696  | 20.36 |
| LGI1    | 2.254  | 0     |
| LGI2    | 3.321  | 0     |
| LGI3    | 3.266  | 0     |
| LGI4    | 2.814  | 5.03  |
| LGICZ1  | 1.289  | 4.45  |
| LGMIN   | 2.138  | 16.01 |
| LGMIN2P | 1.979  | 3.2   |
| LGP2    | 2.613  | 3.87  |
| LGR4    | 5.206  | 0.21  |
| LGR5    | 2.88   | 1.89  |
| LGR6    | 3.64   | 0.36  |
| LGTN    | 2.097  | 29.58 |
| LHB     | 0.523  | 0     |
| LHCGR   | 2.976  | 0     |
| LHFP    | 2.003  | 11.01 |
| LHFPL1  | 1.672  | 0     |
| LHFPL2  | 4.429  | 0.07  |
| LHFPL3  | 3.704  | 0.05  |
| LHFPL4  | 1.444  | 0     |
| LHFPL5  | 2.147  | 0     |
| LHPP    | 2.041  | 4.36  |
| LHX1    | 2.283  | 0     |
| LHX2    | 2.416  | 0     |
| LHX3    | 2.579  | 0     |
| LHX4    | 1.87   | 0.05  |
| LHX5    | 2.084  | 0     |
| LHX6    | 5.527  | 0     |
| LHX8    | 2.373  | 0     |
| LHX9    | 2.689  | 0     |
| LIAS    | 2.321  | 1.57  |
| LIF     | 3.872  | 0.1   |
| LIFR    | 10.079 | 0.12  |
| LIG1    | 3.083  | 4.04  |
| LIG3    | 3.856  | 2.69  |
| LIG4    | 4.224  | 0.8   |
| LILRA1  | 1.91   | 3.99  |
| LILRA2  | 3.212  | 40.91 |
| LILRA3  | 1.577  | 1.32  |
| LILRA4  | 1.708  | 0.06  |
| LILRA5  | 2.202  | 1.26  |
| LILRA6  | 1.395  | 0.21  |
| LILRB1  | 2.971  | 7.49  |
| LILRB2  | 2.197  | 17.97 |
| LILRB3  | 2.17   | 1.14  |
| LILRB4  | 3.721  | 0.16  |
| LILRB5  | 2.087  | 0     |
| LILRP1  | 2.104  | 0.05  |
| LILRP2  | 6.176  | 0.02  |

|        |       |        |
|--------|-------|--------|
| LIM2   | 0.97  | 0      |
| LIMA1  | 3.649 | 0.24   |
| LIMD1  | 6.792 | 31.67  |
| LIMD2  | 4.029 | 107.65 |
| LIME1  | 1.178 | 3.61   |
| LIMK1  | 6.664 | 1.04   |
| LIMK2  | 5.299 | 8.19   |
| LIMS1  | 1.531 | 0.65   |
| LIMS2  | 2.111 | 0.1    |
| LIMS3  | 0.956 | 0      |
| LIN28  | 4.014 | 0      |
| LIN28B | 5.504 | 0      |
| LIN52  | 0.576 | 3.61   |
| LIN54  | 5.756 | 0.59   |
| LIN7A  | 1.23  | 0.16   |
| LIN7B  | 0.755 | 0.78   |
| LIN7C  | 4.671 | 4.11   |
| LIN9   | 3.328 | 0.09   |
| LINCR  | 1.461 | 0      |
| LINGO1 | 2.932 | 0      |
| LINGO2 | 2.792 | 0      |
| LINGO4 | 2.606 | 0      |
| LINS1  | 2.386 | 2.04   |
| LIPA   | 2.624 | 6.52   |
| LIPC   | 1.603 | 0.61   |
| LIPE   | 3.806 | 0.23   |
| LIPF   | 1.365 | 0      |
| LIPG   | 4.141 | 0.03   |
| LIPH   | 2.474 | 0      |
| LIPI   | 1.636 | 0      |
| LIPJ   | 1.483 | 0      |
| LIPK   | 1.2   | 0      |
| LIPM   | 1.197 | 0      |
| LIPN   | 1.413 | 0.14   |
| LIPT1  | 1.722 | 2.24   |
| LITAF  | 2.356 | 62.44  |
| LIX1   | 3.886 | 0      |
| LIX1L  | 1.401 | 4.31   |
| LLGL1  | 4.225 | 1.76   |
| LLGL2  | 4.258 | 1.14   |
| LMAN1  | 3.063 | 8.27   |
| LMAN1L | 1.736 | 0      |
| LMAN2  | 1.581 | 28.6   |
| LMAN2L | 2.398 | 1.16   |
| LMBR1  | 5.532 | 1.77   |
| LMBR1L | 4.744 | 38.4   |
| LMBRD1 | 2.039 | 12.27  |
| LMBRD2 | 3.237 | 0.12   |
| LMCD1  | 1.734 | 1.77   |
| LMLN   | 2.02  | 0      |

|           |        |       |
|-----------|--------|-------|
| LMNA      | 3.393  | 16.39 |
| LMNB1     | 2.882  | 6.49  |
| LMNB2     | 4.635  | 6.7   |
| LMO1      | 1.274  | 0.15  |
| LMO2      | 2.56   | 25.62 |
| LMO3      | 3.882  | 0     |
| LMO4      | 2.29   | 9.85  |
| LMO6      | 1.99   | 1.15  |
| LMO7      | 7.233  | 1.91  |
| LMOD1     | 3.85   | 0     |
| LMOD3     | 4.069  | 0.1   |
| LMTK2     | 11.523 | 2.4   |
| LMTK3     | 4.972  | 0.08  |
| LMX1A     | 3.851  | 0     |
| LMX1B     | 1.119  | 0     |
| LNPEP     | 6.668  | 4.79  |
| LNK1      | 3.74   | 0.21  |
| LNK2      | 5.189  | 6.44  |
| LOC112703 | 1.225  | 1.46  |
| LOC113179 | 1.58   | 0.56  |
| LOC113230 | 1.425  | 0.28  |
| LOC113386 | 1.397  | 11.76 |
| LOC114984 | 0.878  | 0.79  |
| LOC115648 | 1.665  | 2.14  |
| LOC116143 | 2.244  | 0.18  |
| LOC116236 | 2.739  | 3.54  |
| LOC116349 | 0.456  | 0.65  |
| LOC116412 | 2.309  | 0.12  |
| LOC116437 | 0.493  | 0     |
| LOC118945 | 5.077  | 0     |
| LOC119358 | 0.354  | 10.34 |
| LOC119722 | 1.304  | 0     |
| LOC120126 | 1.182  | 0     |
| LOC120318 | 0.747  | 5.83  |
| LOC120321 | 6.677  | 0.19  |
| LOC120364 | 0.966  | 0.41  |
| LOC120376 | 1.672  | 0.42  |
| LOC120449 | 1.292  | 0     |
| LOC120824 | 1.359  | 0     |
| LOC120872 | 0.742  | 0.4   |
| LOC121006 | 5.025  | 0     |
| LOC121014 | 2.191  | 0     |
| LOC121054 | 1.279  | 0     |
| LOC121296 | 13.556 | 0     |
| LOC121456 | 32.275 | 0.08  |
| LOC121498 | 1.142  | 0     |
| LOC121520 | 1.279  | 0.23  |
| LOC121727 | 4.517  | 0     |
| LOC121792 | 1.146  | 1.03  |
| LOC121838 | 0.938  | 0     |

|           |        |        |
|-----------|--------|--------|
| LOC121906 | 10.674 | 0.12   |
| LOC121952 | 0.723  | 0      |
| LOC122145 | 1.796  | 0      |
| LOC122423 | 0.864  | 0      |
| LOC122589 | 1.025  | 0.87   |
| LOC122592 | 4.793  | 0.02   |
| LOC122867 | 0.509  | 21.57  |
| LOC123103 | 1.362  | 0.07   |
| LOC123688 | 2.18   | 0.09   |
| LOC123855 | 3.259  | 0.12   |
| LOC123862 | 0.401  | 0.25   |
| LOC123876 | 2.322  | 0      |
| LOC124199 | 3.087  | 1.41   |
| LOC124220 | 0.828  | 0.48   |
| LOC124446 | 1.437  | 44.4   |
| LOC124496 | 0.76   | 10.94  |
| LOC124512 | 1.025  | 8.01   |
| LOC124865 | 0.703  | 0.28   |
| LOC124974 | 0.8    | 0.37   |
| LOC125208 | 0.911  | 214.49 |
| LOC125242 | 0.246  | 0      |
| LOC126075 | 3.259  | 2      |
| LOC126147 | 1.836  | 1.24   |
| LOC126170 | 0.48   | 0.2    |
| LOC126235 | 0.868  | 0.8    |
| LOC126242 | 0.95   | 6.67   |
| LOC126506 | 1.958  | 1.01   |
| LOC126520 | 1.933  | 0      |
| LOC126536 | 3.102  | 0      |
| LOC126661 | 1.031  | 2.2    |
| LOC126811 | 8.059  | 0      |
| LOC126860 | 0.492  | 0      |
| LOC126987 | 3.724  | 0      |
| LOC127011 | 1.034  | 1.63   |
| LOC127086 | 3.465  | 0.11   |
| LOC127099 | 0.351  | 1.13   |
| LOC127295 | 0.243  | 132.73 |
| LOC127406 | 0.522  | 0      |
| LOC127602 | 13.622 | 0.02   |
| LOC127671 | 17.297 | 0.01   |
| LOC128102 | 0.161  | 0      |
| LOC128136 | 29.845 | 0      |
| LOC128192 | 0.492  | 0.4    |
| LOC128322 | 0.381  | 0      |
| LOC128820 | 2.889  | 0      |
| LOC128977 | 1.221  | 12.32  |
| LOC129026 | 2.482  | 0      |
| LOC129293 | 1.859  | 0.27   |
| LOC129402 | 2.119  | 0      |
| LOC129522 | 1.977  | 0.85   |



|           |        |        |
|-----------|--------|--------|
| LOC129530 | 0.99   | 0.2    |
| LOC129560 | 2.599  | 0.68   |
| LOC129607 | 1.609  | 0.25   |
| LOC129656 | 10.185 | 0.03   |
| LOC129841 | 0.883  | 0.12   |
| LOC129870 | 1.182  | 0      |
| LOC129881 | 2.351  | 0.04   |
| LOC130074 | 4.644  | 30.76  |
| LOC130195 | 2.827  | 0      |
| LOC130355 | 1.15   | 0.86   |
| LOC130429 | 0.844  | 0.12   |
| LOC130576 | 1.573  | 0      |
| LOC130700 | 0.618  | 1.6    |
| LOC130728 | 0.821  | 0      |
| LOC130773 | 0.497  | 0.4    |
| LOC130865 | 0.437  | 0.68   |
| LOC130940 | 2.186  | 0      |
| LOC130951 | 2.543  | 0      |
| LOC131054 | 48.124 | 0.04   |
| LOC131055 | 0.753  | 0      |
| LOC131149 | 1.434  | 0      |
| LOC131185 | 2.779  | 2.1    |
| LOC131572 | 1.052  | 0      |
| LOC131691 | 0.701  | 0.43   |
| LOC131873 | 9.089  | 0      |
| LOC131909 | 2.295  | 0      |
| LOC131961 | 2.264  | 0.4    |
| LOC131973 | 5.244  | 0      |
| LOC132205 | 108.44 | 0      |
| LOC132386 | 0.751  | 0      |
| LOC132391 | 1.272  | 0.16   |
| LOC132430 | 10.36  | 0      |
| LOC132556 | 0.487  | 7.11   |
| LOC132707 | 0.3    | 0      |
| LOC132719 | 0.916  | 0      |
| LOC132817 | 7.303  | 0.17   |
| LOC133083 | 1.58   | 1.32   |
| LOC133185 | 0.333  | 0.29   |
| LOC133308 | 2.427  | 1.23   |
| LOC133332 | 2.324  | 0      |
| LOC133491 | 2.723  | 0      |
| LOC133569 | 0.482  | 0.41   |
| LOC133629 | 0.532  | 323.03 |
| LOC133748 | 0.792  | 0.12   |
| LOC133789 | 0.315  | 7.23   |
| LOC133790 | 0.459  | 7.33   |
| LOC133874 | 0.452  | 0      |
| LOC134121 | 2.774  | 0      |
| LOC134145 | 1.814  | 0.66   |
| LOC134357 | 23.633 | 0.03   |

|           |         |        |
|-----------|---------|--------|
| LOC134466 | 2.456   | 0      |
| LOC134505 | 0.656   | 6.79   |
| LOC134997 | 1.123   | 35.86  |
| LOC135270 | 1.042   | 0.47   |
| LOC135896 | 0.939   | 0      |
| LOC136143 | 0.471   | 151.87 |
| LOC136242 | 2.378   | 0      |
| LOC136288 | 4.665   | 0.04   |
| LOC136307 | 4.506   | 0.02   |
| LOC136542 | 12.7    | 0.03   |
| LOC137012 | 1.303   | 4.1    |
| LOC137107 | 0.648   | 0.3    |
| LOC137885 | 0.342   | 0      |
| LOC137886 | 4.971   | 0.34   |
| LOC138046 | 2.903   | 0      |
| LOC138159 | 3.888   | 0      |
| LOC138234 | 0.581   | 3.06   |
| LOC138412 | 101.225 | 0.34   |
| LOC138652 | 1.563   | 0      |
| LOC138864 | 0.486   | 1.23   |
| LOC138916 | 1.466   | 0.2    |
| LOC138948 | 2.901   | 2.56   |
| LOC138971 | 1.637   | 0.24   |
| LOC138972 | 9.276   | 0.02   |
| LOC139060 | 1.163   | 0      |
| LOC139061 | 0.469   | 0      |
| LOC139163 | 8.825   | 0.03   |
| LOC139201 | 1.274   | 0.16   |
| LOC139249 | 5.116   | 0      |
| LOC139334 | 2.3     | 0.22   |
| LOC139363 | 5.509   | 0      |
| LOC139431 | 0.652   | 0      |
| LOC139452 | 0.864   | 1.03   |
| LOC139466 | 95.279  | 0      |
| LOC139516 | 11.127  | 0      |
| LOC139587 | 21.348  | 0      |
| LOC139604 | 0.975   | 0      |
| LOC139735 | 1.2     | 0      |
| LOC139748 | 22.913  | 0      |
| LOC139952 | 38.669  | 0.02   |
| LOC139957 | 0.691   | 1.71   |
| LOC140004 | 2.836   | 0      |
| LOC140028 | 1.267   | 0      |
| LOC140446 | 2.223   | 0      |
| LOC143188 | 1.335   | 7.71   |
| LOC143244 | 4.043   | 0.37   |
| LOC143506 | 0.585   | 0      |
| LOC143543 | 1.827   | 0.38   |
| LOC143666 | 2.078   | 0.14   |
| LOC143678 | 0.365   | 0      |

|           |        |       |
|-----------|--------|-------|
| LOC143941 | 0.679  | 0.59  |
| LOC144097 | 1.961  | 2.83  |
| LOC144233 | 1.482  | 0.67  |
| LOC144383 | 0.667  | 5.04  |
| LOC144481 | 2.228  | 39.21 |
| LOC144817 | 2.036  | 0     |
| LOC145757 | 0.61   | 0     |
| LOC145783 | 1.443  | 1.51  |
| LOC145814 | 0.995  | 0     |
| LOC145837 | 1.18   | 0     |
| LOC145853 | 0.772  | 3.85  |
| LOC145989 | 1.478  | 2.94  |
| LOC146053 | 0.898  | 1.87  |
| LOC146110 | 0.62   | 0.96  |
| LOC146167 | 1.308  | 0     |
| LOC146177 | 4.216  | 0     |
| LOC146253 | 2.51   | 2.01  |
| LOC146325 | 2.217  | 0     |
| LOC146429 | 1.86   | 0     |
| LOC146439 | 3.586  | 0     |
| LOC146481 | 1.414  | 0     |
| LOC146517 | 7.518  | 30.1  |
| LOC146909 | 2.669  | 0.44  |
| LOC147150 | 2.083  | 0.62  |
| LOC147226 | 2.046  | 0.87  |
| LOC147228 | 3.987  | 0     |
| LOC147645 | 3.679  | 0.11  |
| LOC147646 | 1.318  | 0.9   |
| LOC147650 | 1.894  | 0.58  |
| LOC147710 | 0.991  | 0     |
| LOC147804 | 0.979  | 3.84  |
| LOC148003 | 0.596  | 0     |
| LOC148198 | 4.135  | 0     |
| LOC148430 | 13.754 | 0.6   |
| LOC148646 | 3.014  | 0     |
| LOC148696 | 3.527  | 0.08  |
| LOC148709 | 15.809 | 0     |
| LOC148766 | 0.498  | 0     |
| LOC149086 | 0.777  | 0.51  |
| LOC149134 | 2.549  | 0.28  |
| LOC149157 | 0.884  | 0     |
| LOC149224 | 0.582  | 0.34  |
| LOC149351 | 1.555  | 0.12  |
| LOC149478 | 1.308  | 2.65  |
| LOC149501 | 3.905  | 0     |
| LOC149643 | 0.506  | 0     |
| LOC149773 | 1.419  | 0     |
| LOC149844 | 2.558  | 4.45  |
| LOC150084 | 2.066  | 0     |
| LOC150221 | 6.105  | 0     |

|           |       |       |
|-----------|-------|-------|
| LOC150223 | 2.356 | 5.41  |
| LOC150383 | 2.841 | 0.31  |
| LOC150417 | 1.024 | 11.11 |
| LOC150516 | 3.075 | 0.16  |
| LOC150554 | 2.769 | 3.64  |
| LOC150577 | 3.115 | 0     |
| LOC150739 | 0.642 | 0     |
| LOC150763 | 2.823 | 0.46  |
| LOC150786 | 3.044 | 0.46  |
| LOC150935 | 0.513 | 0     |
| LOC151121 | 0.458 | 0     |
| LOC151174 | 0.733 | 0.13  |
| LOC151234 | 1.875 | 0     |
| LOC151276 | 0.562 | 1.06  |
| LOC151457 | 2.743 | 1.23  |
| LOC151507 | 2.04  | 0.43  |
| LOC151579 | 2.877 | 6.95  |
| LOC151760 | 0.913 | 0     |
| LOC151825 | 1.282 | 0     |
| LOC152024 | 2.967 | 0.1   |
| LOC152028 | 2.04  | 0.39  |
| LOC152118 | 0.58  | 0     |
| LOC152217 | 1.441 | 16.68 |
| LOC152485 | 4.156 | 2.52  |
| LOC152573 | 1.971 | 0.05  |
| LOC152586 | 3.783 | 0     |
| LOC152594 | 1.7   | 3.26  |
| LOC152663 | 0.624 | 7.77  |
| LOC152667 | 1.377 | 5.96  |
| LOC152742 | 2.325 | 0     |
| LOC152845 | 1.489 | 0.86  |
| LOC152905 | 2.584 | 5.02  |
| LOC153222 | 5.964 | 15.31 |
| LOC153328 | 1.148 | 0     |
| LOC153364 | 4.28  | 0.16  |
| LOC153684 | 2.311 | 4.32  |
| LOC153893 | 0.869 | 0.68  |
| LOC153932 | 5.449 | 0.98  |
| LOC154449 | 1.33  | 0     |
| LOC154872 | 1.338 | 0     |
| LOC154907 | 0.844 | 0     |
| LOC154937 | 4.27  | 0.37  |
| LOC155006 | 5.274 | 0.04  |
| LOC155100 | 4.852 | 6.36  |
| LOC157489 | 4.306 | 0.34  |
| LOC157667 | 0.52  | 3.24  |
| LOC157713 | 2.42  | 2.5   |
| LOC157916 | 1.356 | 0     |
| LOC158078 | 1.741 | 90.07 |
| LOC158301 | 2.141 | 0     |

|           |        |       |
|-----------|--------|-------|
| LOC158345 | 13.198 | 3.57  |
| LOC158376 | 1.538  | 0.45  |
| LOC158381 | 3.928  | 0.38  |
| LOC158383 | 1.747  | 0.85  |
| LOC158452 | 1.25   | 0     |
| LOC158572 | 0.443  | 0     |
| LOC158714 | 2.855  | 2.6   |
| LOC158781 | 2.655  | 0.45  |
| LOC158830 | 0.566  | 4.02  |
| LOC158852 | 1.01   | 0     |
| LOC158948 | 2.254  | 0.31  |
| LOC159007 | 2.558  | 0.19  |
| LOC159770 | 1.336  | 0.44  |
| LOC160313 | 0.635  | 0     |
| LOC160410 | 0.981  | 0.5   |
| LOC161247 | 0.91   | 0.54  |
| LOC161527 | 7.181  | 0.26  |
| LOC161931 | 2.283  | 0.04  |
| LOC162073 | 2.979  | 9.1   |
| LOC162427 | 3.759  | 7.15  |
| LOC162993 | 2.77   | 0.75  |
| LOC165186 | 2.767  | 0.04  |
| LOC168474 | 37.8   | 0.09  |
| LOC169834 | 2.379  | 0.17  |
| LOC192127 | 1.72   | 0     |
| LOC192128 | 1.585  | 0     |
| LOC192130 | 0.917  | 0     |
| LOC192131 | 0.514  | 0     |
| LOC192132 | 0.516  | 0     |
| LOC192133 | 0.703  | 70.37 |
| LOC196120 | 0.585  | 0     |
| LOC196188 | 0.701  | 0.14  |
| LOC196264 | 0.983  | 0.2   |
| LOC196346 | 0.846  | 0     |
| LOC196415 | 1.516  | 0     |
| LOC196463 | 2.568  | 2.43  |
| LOC196469 | 1.154  | 0.09  |
| LOC196541 | 1.085  | 0     |
| LOC196549 | 3.283  | 0.03  |
| LOC196752 | 2.272  | 1.17  |
| LOC196913 | 0.975  | 0     |
| LOC196993 | 1.332  | 0     |
| LOC197135 | 1.979  | 4.65  |
| LOC197322 | 3.555  | 2.04  |
| LOC197331 | 2.167  | 0     |
| LOC197350 | 1.437  | 0     |
| LOC198437 | 0.868  | 0     |
| LOC199800 | 1.728  | 0.57  |
| LOC199882 | 0.525  | 0     |
| LOC199897 | 0.65   | 0     |

|           |         |       |
|-----------|---------|-------|
| LOC200025 | 1.723   | 0.05  |
| LOC200149 | 3.191   | 0     |
| LOC200230 | 2.405   | 0.2   |
| LOC200261 | 1.896   | 0     |
| LOC200312 | 1.922   | 2.06  |
| LOC200420 | 1.597   | 0.12  |
| LOC200810 | 0.805   | 0     |
| LOC201164 | 2.563   | 1.08  |
| LOC201175 | 2.319   | 2.82  |
| LOC201181 | 1.989   | 0.05  |
| LOC201259 | 2.932   | 0.2   |
| LOC201288 | 6.196   | 0     |
| LOC201626 | 3.882   | 3.44  |
| LOC201651 | 15.233  | 0     |
| LOC201725 | 3.503   | 1.58  |
| LOC202051 | 1.016   | 0.68  |
| LOC202122 | 0.416   | 4.28  |
| LOC202134 | 5.329   | 0     |
| LOC202181 | 2.751   | 1.95  |
| LOC202227 | 0.661   | 0     |
| LOC202319 | 0.478   | 0.2   |
| LOC202459 | 1.197   | 1.49  |
| LOC203510 | 1.965   | 0     |
| LOC203547 | 4.688   | 3.84  |
| LOC203930 | 2.736   | 0.43  |
| LOC204010 | 1       | 0.2   |
| LOC204800 | 1.154   | 1.11  |
| LOC205251 | 0.679   | 1.75  |
| LOC205272 | 3.695   | 0     |
| LOC206227 | 0.633   | 0     |
| LOC219404 | 2.42    | 19.46 |
| LOC219752 | 161.418 | 0     |
| LOC219854 | 3.657   | 0.13  |
| LOC220077 | 1.442   | 0     |
| LOC220115 | 100.711 | 0     |
| LOC220147 | 1.458   | 0     |
| LOC220429 | 2.649   | 0.04  |
| LOC220433 | 2.672   | 1.37  |
| LOC220594 | 4.329   | 1.14  |
| LOC220686 | 2.272   | 5.01  |
| LOC220729 | 13.916  | 0.5   |
| LOC220959 | 30.643  | 0.01  |
| LOC221091 | 2.414   | 1.52  |
| LOC221442 | 3.037   | 1.31  |
| LOC221838 | 3.488   | 42.92 |
| LOC222005 | 68.691  | 0.06  |
| LOC222032 | 48.879  | 0     |
| LOC222052 | 1.158   | 0.17  |
| LOC222103 | 1.52    | 0.45  |
| LOC222699 | 3.592   | 0.03  |

|           |        |        |
|-----------|--------|--------|
| LOC222901 | 0.648  | 89.62  |
| LOC222967 | 6.212  | 0.32   |
| LOC23117  | 9.381  | 1.48   |
| LOC246135 | 1.916  | 0.2    |
| LOC246717 | 0.357  | 0      |
| LOC246718 | 3.569  | 4.19   |
| LOC246720 | 0.639  | 0.47   |
| LOC246723 | 0.585  | 18.26  |
| LOC246784 | 1.695  | 3.32   |
| LOC246785 | 1.725  | 7.46   |
| LOC252840 | 0.904  | 0      |
| LOC252841 | 0.906  | 0      |
| LOC252968 | 3.001  | 0.23   |
| LOC253012 | 6.46   | 0.15   |
| LOC253482 | 0.699  | 225.47 |
| LOC253665 | 0.463  | 5.56   |
| LOC253724 | 3.97   | 0      |
| LOC253820 | 0.63   | 0      |
| LOC253970 | 1.487  | 0      |
| LOC254398 | 4.851  | 0      |
| LOC255130 | 0.919  | 0.11   |
| LOC255208 | 2.12   | 0      |
| LOC255275 | 3.042  | 0.03   |
| LOC255308 | 2.672  | 20.32  |
| LOC255374 | 3.004  | 0.2    |
| LOC255411 | 0.894  | 0      |
| LOC255480 | 0.991  | 0      |
| LOC255519 | 28.116 | 0.01   |
| LOC255620 | 1.243  | 0      |
| LOC255649 | 2.124  | 0      |
| LOC255783 | 0.807  | 10.05  |
| LOC255809 | 1.41   | 3.72   |
| LOC256223 | 2.088  | 0      |
| LOC256374 | 0.525  | 0.37   |
| LOC256483 | 0.584  | 0      |
| LOC256880 | 1.985  | 0      |
| LOC257039 | 0.742  | 0.27   |
| LOC257054 | 2.556  | 0      |
| LOC257358 | 0.47   | 0      |
| LOC257407 | 4.128  | 0      |
| LOC25845  | 1.584  | 5.12   |
| LOC259308 | 6.298  | 0.02   |
| LOC260329 | 1.497  | 4.63   |
| LOC260334 | 2.168  | 0      |
| LOC260337 | 3.085  | 2.05   |
| LOC260338 | 2.182  | 0      |
| LOC260339 | 2.768  | 0      |
| LOC260340 | 1.945  | 0      |
| LOC260341 | 4.446  | 0.38   |
| LOC260421 | 1.108  | 0.45   |

|           |        |      |
|-----------|--------|------|
| LOC260422 | 1.605  | 1.48 |
| LOC26221  | 3.022  | 0.06 |
| LOC266619 | 0.211  | 0    |
| LOC266683 | 0.352  | 2.25 |
| LOC266693 | 0.577  | 2.58 |
| LOC266694 | 0.832  | 1.19 |
| LOC266783 | 2.846  | 3.99 |
| LOC266786 | 1.7    | 0.06 |
| LOC268276 | 1.201  | 0.16 |
| LOC280637 | 0.931  | 3.93 |
| LOC280644 | 2.713  | 0.04 |
| LOC283014 | 10.252 | 0.21 |
| LOC283028 | 2.436  | 0    |
| LOC283104 | 1.776  | 0.05 |
| LOC283114 | 0.491  | 7.86 |
| LOC283116 | 2.162  | 0    |
| LOC283129 | 0.843  | 0    |
| LOC283143 | 3.322  | 0    |
| LOC283152 | 0.625  | 1.11 |
| LOC283155 | 9.327  | 0    |
| LOC283172 | 0.899  | 0    |
| LOC283174 | 3.888  | 0.1  |
| LOC283236 | 0.572  | 0.17 |
| LOC283257 | 7.553  | 0    |
| LOC283320 | 1.752  | 0.06 |
| LOC283331 | 1.911  | 0.46 |
| LOC283343 | 1.231  | 0    |
| LOC283345 | 0.586  | 0.51 |
| LOC283392 | 0.43   | 0    |
| LOC283398 | 2.554  | 1.09 |
| LOC283412 | 0.64   | 0.93 |
| LOC283440 | 0.572  | 0.17 |
| LOC283480 | 0.868  | 0    |
| LOC283481 | 1.128  | 0    |
| LOC283514 | 1.92   | 0.05 |
| LOC283523 | 2.034  | 0    |
| LOC283537 | 3.157  | 2.01 |
| LOC283547 | 1.542  | 0    |
| LOC283551 | 2.686  | 0.04 |
| LOC283553 | 0.576  | 0    |
| LOC283584 | 0.77   | 0    |
| LOC283585 | 1.766  | 0    |
| LOC283663 | 1.177  | 7.48 |
| LOC283683 | 2.09   | 0.14 |
| LOC283688 | 0.811  | 0    |
| LOC283693 | 1.119  | 0.62 |
| LOC283698 | 1.641  | 0.73 |
| LOC283710 | 1.033  | 0.1  |
| LOC283755 | 4.222  | 0.52 |
| LOC283767 | 3.699  | 0    |



|           |        |       |
|-----------|--------|-------|
| LOC283804 | 1.845  | 0     |
| LOC283867 | 2.48   | 0.04  |
| LOC283871 | 4.346  | 1.27  |
| LOC283874 | 5.578  | 0.87  |
| LOC283904 | 3.408  | 0     |
| LOC283951 | 1.071  | 2.77  |
| LOC283953 | 0.644  | 0     |
| LOC283970 | 2.248  | 3.87  |
| LOC283999 | 1.003  | 0     |
| LOC284009 | 0.576  | 0.52  |
| LOC284023 | 2.523  | 0.31  |
| LOC284064 | 0.468  | 0.84  |
| LOC284067 | 0.974  | 0     |
| LOC284100 | 2.449  | 0.04  |
| LOC284167 | 21.208 | 0.16  |
| LOC284184 | 0.766  | 5.55  |
| LOC284196 | 3.986  | 0     |
| LOC284215 | 1.109  | 0     |
| LOC284226 | 10.167 | 0.01  |
| LOC284230 | 0.399  | 0.5   |
| LOC284269 | 2.399  | 0.04  |
| LOC284274 | 1.369  | 0     |
| LOC284288 | 0.564  | 1.57  |
| LOC284296 | 4.203  | 0.07  |
| LOC284297 | 0.418  | 0     |
| LOC284361 | 3.237  | 22.83 |
| LOC284371 | 3.537  | 3.05  |
| LOC284379 | 5.092  | 0     |
| LOC284395 | 0.564  | 0     |
| LOC284402 | 0.365  | 0     |
| LOC284422 | 0.908  | 14.05 |
| LOC284428 | 0.777  | 0     |
| LOC284441 | 3.594  | 7.93  |
| LOC284577 | 2.897  | 0     |
| LOC284620 | 0.741  | 0     |
| LOC284685 | 2.197  | 24.32 |
| LOC284701 | 0.836  | 0     |
| LOC284751 | 0.432  | 0     |
| LOC284757 | 4.211  | 0.04  |
| LOC284801 | 2.249  | 13.82 |
| LOC284821 | 1.143  | 4.5   |
| LOC284861 | 3.821  | 0     |
| LOC284890 | 0.716  | 0     |
| LOC284912 | 0.853  | 0     |
| LOC284952 | 3.218  | 0.43  |
| LOC284964 | 1.518  | 0     |
| LOC284988 | 2.949  | 0.2   |
| LOC284998 | 2.113  | 0     |
| LOC285016 | 0.496  | 1.8   |
| LOC285033 | 0.537  | 1.29  |

|           |        |        |
|-----------|--------|--------|
| LOC285047 | 0.769  | 0      |
| LOC285053 | 1.264  | 4.15   |
| LOC285074 | 1.957  | 8.19   |
| LOC285095 | 1.054  | 9.39   |
| LOC285141 | 0.596  | 0      |
| LOC285176 | 0.778  | 1.53   |
| LOC285191 | 2.106  | 0      |
| LOC285205 | 0.775  | 0      |
| LOC285216 | 12.107 | 0      |
| LOC285232 | 3.591  | 0.11   |
| LOC285260 | 0.371  | 0.8    |
| LOC285296 | 6.079  | 1.32   |
| LOC285299 | 2.075  | 0.62   |
| LOC285303 | 3.569  | 0      |
| LOC285346 | 0.867  | 2.74   |
| LOC285359 | 2.478  | 0.32   |
| LOC285382 | 5.901  | 0      |
| LOC285407 | 0.895  | 0      |
| LOC285412 | 2.279  | 2.74   |
| LOC285423 | 2.138  | 0      |
| LOC285442 | 2.503  | 2.45   |
| LOC285453 | 1.102  | 0.45   |
| LOC285484 | 2.756  | 0      |
| LOC285501 | 1.037  | 0.1    |
| LOC285550 | 9.011  | 1.53   |
| LOC285556 | 10.186 | 0      |
| LOC285563 | 0.597  | 0      |
| LOC285588 | 0.48   | 0      |
| LOC285591 | 1.254  | 6.55   |
| LOC285634 | 42.058 | 0.02   |
| LOC285636 | 5.222  | 2.75   |
| LOC285643 | 4.426  | 0.12   |
| LOC285647 | 2.66   | 0.93   |
| LOC285679 | 1.182  | 0      |
| LOC285697 | 0.552  | 0      |
| LOC285706 | 2.476  | 1.04   |
| LOC285733 | 2.738  | 0      |
| LOC285735 | 0.322  | 0      |
| LOC285741 | 0.744  | 439.89 |
| LOC285840 | 1.392  | 0      |
| LOC285872 | 2.418  | 0.08   |
| LOC285900 | 1.728  | 0.23   |
| LOC285908 | 8.822  | 1.52   |
| LOC285941 | 3.912  | 0      |
| LOC285943 | 2.021  | 0      |
| LOC286016 | 4.225  | 8.53   |
| LOC286076 | 1.002  | 0.6    |
| LOC286150 | 0.877  | 0.56   |
| LOC286157 | 0.957  | 301.57 |
| LOC286187 | 1.084  | 0      |

|           |         |       |
|-----------|---------|-------|
| LOC286238 | 0.585   | 0     |
| LOC286239 | 153.029 | 0.01  |
| LOC286334 | 2.732   | 3.08  |
| LOC286348 | 0.778   | 0.38  |
| LOC286411 | 1.649   | 0     |
| LOC286434 | 2.197   | 0     |
| LOC286444 | 0.964   | 1.74  |
| LOC286456 | 2.927   | 0.33  |
| LOC286467 | 1.466   | 1.48  |
| LOC286495 | 6.168   | 2.47  |
| LOC286512 | 1.201   | 16.23 |
| LOC286526 | 1.029   | 0     |
| LOC286528 | 0.585   | 0.34  |
| LOC286568 | 0.543   | 0.18  |
| LOC286570 | 0.543   | 0.18  |
| LOC29060  | 1.834   | 0.21  |
| LOC317727 | 7.308   | 1.77  |
| LOC317753 | 1.456   | 4.28  |
| LOC317786 | 2.671   | 1.37  |
| LOC338091 | 0.465   | 0.85  |
| LOC338095 | 0.79    | 3.26  |
| LOC338096 | 0.805   | 0.61  |
| LOC338097 | 0.764   | 0.26  |
| LOC338098 | 0.374   | 1.59  |
| LOC338099 | 0.775   | 4.09  |
| LOC338328 | 2.28    | 0.09  |
| LOC338586 | 0.384   | 0     |
| LOC338588 | 1.864   | 0     |
| LOC338591 | 17.652  | 0.01  |
| LOC338598 | 8.789   | 0     |
| LOC338611 | 0.357   | 0     |
| LOC338667 | 2.967   | 0     |
| LOC338739 | 0.634   | 0.31  |
| LOC338756 | 0.531   | 0     |
| LOC338758 | 3.526   | 0.2   |
| LOC338797 | 0.501   | 0     |
| LOC338799 | 3.848   | 12.58 |
| LOC338805 | 0.387   | 0     |
| LOC338809 | 1.377   | 0     |
| LOC338829 | 3.657   | 0     |
| LOC338870 | 0.422   | 1.88  |
| LOC338963 | 0.436   | 0     |
| LOC339047 | 3.655   | 0.03  |
| LOC339123 | 2.042   | 10.46 |
| LOC339186 | 3.153   | 0     |
| LOC339192 | 0.473   | 3.97  |
| LOC339209 | 0.835   | 0     |
| LOC339229 | 1.426   | 13.81 |
| LOC339240 | 3.153   | 0     |
| LOC339241 | 3.988   | 0     |

|           |        |      |
|-----------|--------|------|
| LOC339244 | 1.407  | 0    |
| LOC339256 | 4.414  | 0    |
| LOC339257 | 2.953  | 0.3  |
| LOC339258 | 3.156  | 0    |
| LOC339290 | 2.115  | 2.81 |
| LOC339344 | 1.887  | 1.26 |
| LOC339352 | 4.309  | 0    |
| LOC339396 | 4.47   | 0    |
| LOC339457 | 2.756  | 0    |
| LOC339524 | 2.375  | 0    |
| LOC339535 | 1.559  | 2.92 |
| LOC339562 | 0.474  | 0    |
| LOC339674 | 1.506  | 0.13 |
| LOC339736 | 2.286  | 0.09 |
| LOC339742 | 1.107  | 0    |
| LOC339745 | 5.709  | 2.81 |
| LOC339760 | 1.365  | 0    |
| LOC339766 | 5.749  | 0    |
| LOC339778 | 2.842  | 0    |
| LOC339781 | 1.333  | 0    |
| LOC339804 | 0.701  | 0.57 |
| LOC339809 | 5.135  | 0    |
| LOC339843 | 3.275  | 1.57 |
| LOC339845 | 4.645  | 0    |
| LOC339858 | 0.574  | 1.21 |
| LOC339879 | 2.262  | 0    |
| LOC339881 | 1.835  | 3.18 |
| LOC339897 | 51.955 | 0.01 |
| LOC339966 | 23.148 | 0.03 |
| LOC339970 | 4.107  | 2.22 |
| LOC339977 | 3.337  | 0    |
| LOC340069 | 1.176  | 0    |
| LOC340089 | 14.647 | 0.01 |
| LOC340094 | 0.751  | 0    |
| LOC340096 | 0.444  | 0    |
| LOC340113 | 2.008  | 0    |
| LOC340192 | 2.105  | 1.03 |
| LOC340204 | 0.575  | 0    |
| LOC340221 | 34.488 | 0.03 |
| LOC340268 | 2.349  | 0    |
| LOC340274 | 1.22   | 0.16 |
| LOC340286 | 3.194  | 0.28 |
| LOC340443 | 0.613  | 0.48 |
| LOC340460 | 4.374  | 0    |
| LOC340499 | 2.229  | 0.18 |
| LOC340501 | 7.968  | 0    |
| LOC340502 | 1.676  | 0    |
| LOC340508 | 8.537  | 0    |
| LOC340515 | 2.02   | 0    |
| LOC340569 | 0.437  | 0    |

|           |         |      |
|-----------|---------|------|
| LOC340598 | 0.855   | 0    |
| LOC340600 | 1.436   | 0.14 |
| LOC340602 | 1.924   | 0    |
| LOC340623 | 1.163   | 0    |
| LOC340780 | 2.281   | 0.82 |
| LOC340844 | 5.802   | 0.17 |
| LOC340888 | 1.08    | 0    |
| LOC340900 | 1.101   | 0    |
| LOC340947 | 1.995   | 1.24 |
| LOC340970 | 32.339  | 0.01 |
| LOC341056 | 1.026   | 2.02 |
| LOC341112 | 0.558   | 0    |
| LOC341230 | 1.46    | 0.07 |
| LOC341315 | 3.922   | 17.6 |
| LOC341333 | 128.541 | 0.01 |
| LOC341346 | 0.859   | 0    |
| LOC341378 | 4.738   | 0.04 |
| LOC341392 | 1.743   | 0    |
| LOC341412 | 23.408  | 0.2  |
| LOC341457 | 0.688   | 0    |
| LOC341604 | 16.144  | 0.03 |
| LOC341651 | 0.764   | 2.72 |
| LOC341674 | 0.656   | 0.3  |
| LOC341689 | 2.362   | 0.04 |
| LOC341784 | 19.339  | 0.05 |
| LOC341965 | 1.02    | 1.65 |
| LOC342293 | 0.816   | 0    |
| LOC342346 | 3.18    | 0.04 |
| LOC342374 | 1.291   | 0    |
| LOC342419 | 11.856  | 0.02 |
| LOC342426 | 3.128   | 0    |
| LOC342443 | 2.2     | 0    |
| LOC342531 | 7.996   | 0.01 |
| LOC342541 | 0.546   | 0.18 |
| LOC342599 | 6.017   | 0.1  |
| LOC342705 | 1.444   | 7.4  |
| LOC342732 | 7.294   | 0    |
| LOC342784 | 1.638   | 0.18 |
| LOC342865 | 1.91    | 0    |
| LOC342897 | 1.973   | 0    |
| LOC342918 | 1.289   | 2.38 |
| LOC342979 | 1.516   | 0    |
| LOC343052 | 10.271  | 0.2  |
| LOC343165 | 1.942   | 0    |
| LOC343184 | 0.918   | 0.43 |
| LOC343296 | 1.13    | 0.18 |
| LOC343301 | 0.652   | 0.3  |
| LOC343326 | 1.596   | 0    |
| LOC343338 | 27.363  | 0.01 |
| LOC343384 | 0.492   | 0    |

|           |        |       |
|-----------|--------|-------|
| LOC343492 | 0.684  | 1.59  |
| LOC343495 | 1.202  | 0.58  |
| LOC343508 | 2.312  | 2.57  |
| LOC343515 | 1.272  | 5.37  |
| LOC343851 | 0.327  | 1.21  |
| LOC343981 | 81.031 | 0     |
| LOC344065 | 1.862  | 0.43  |
| LOC344167 | 0.582  | 0     |
| LOC344178 | 9.731  | 0.01  |
| LOC344320 | 4.522  | 0     |
| LOC344328 | 1.109  | 0     |
| LOC344332 | 0.282  | 0     |
| LOC344371 | 0.98   | 6.67  |
| LOC344382 | 1.047  | 13.23 |
| LOC344405 | 0.521  | 1.33  |
| LOC344423 | 1.313  | 8.59  |
| LOC344462 | 9.017  | 0.08  |
| LOC344471 | 0.498  | 0.6   |
| LOC344593 | 4.476  | 0.2   |
| LOC344595 | 1.34   | 0.15  |
| LOC344653 | 1.867  | 0.9   |
| LOC344657 | 1.825  | 0     |
| LOC344709 | 4.362  | 0.36  |
| LOC344741 | 0.964  | 0.31  |
| LOC344787 | 2.657  | 0.26  |
| LOC344866 | 9.542  | 0.02  |
| LOC344875 | 3.475  | 0     |
| LOC344887 | 14.573 | 0.01  |
| LOC344967 | 18.729 | 0.13  |
| LOC344978 | 57.183 | 0.17  |
| LOC345016 | 8.554  | 0.07  |
| LOC345041 | 1.838  | 0.91  |
| LOC345222 | 3.164  | 0     |
| LOC345258 | 1.703  | 0.24  |
| LOC345430 | 10.137 | 0     |
| LOC345471 | 1.132  | 6.73  |
| LOC345537 | 0.495  | 0.2   |
| LOC345571 | 6.579  | 0.27  |
| LOC345576 | 27.278 | 0.45  |
| LOC345630 | 1.13   | 0     |
| LOC345643 | 2.091  | 0     |
| LOC345645 | 15.711 | 0.01  |
| LOC345829 | 0.832  | 7.25  |
| LOC346085 | 1.248  | 10.7  |
| LOC346296 | 8.88   | 0.38  |
| LOC346329 | 2.136  | 1.85  |
| LOC346588 | 0.524  | 0.37  |
| LOC346653 | 2.398  | 0.25  |
| LOC346702 | 2.917  | 0.17  |
| LOC347028 | 1.871  | 0.79  |

|           |        |        |
|-----------|--------|--------|
| LOC347097 | 2.86   | 0.14   |
| LOC347119 | 1.404  | 0      |
| LOC347193 | 1.74   | 0.46   |
| LOC347273 | 2.632  | 0.07   |
| LOC347275 | 6.527  | 0      |
| LOC347281 | 54.793 | 0.01   |
| LOC347292 | 0.318  | 356.24 |
| LOC347333 | 80.54  | 0      |
| LOC347363 | 60.788 | 0      |
| LOC347364 | 0.282  | 0      |
| LOC347381 | 2      | 2.08   |
| LOC347411 | 0.897  | 0      |
| LOC347422 | 22.424 | 0.1    |
| LOC347475 | 1.55   | 0      |
| LOC347509 | 0.739  | 0      |
| LOC347549 | 0.864  | 0      |
| LOC347674 | 1.498  | 0      |
| LOC347675 | 1.327  | 0      |
| LOC347701 | 1.05   | 0      |
| LOC347716 | 9.572  | 0.13   |
| LOC347717 | 0.905  | 0      |
| LOC347806 | 25.012 | 0      |
| LOC348021 | 2.141  | 0      |
| LOC348174 | 1.955  | 0.1    |
| LOC348180 | 1.936  | 2.14   |
| LOC348262 | 3.007  | 0      |
| LOC348751 | 1.157  | 0      |
| LOC348801 | 2.991  | 0.5    |
| LOC348808 | 2.493  | 0.04   |
| LOC348840 | 2.171  | 0      |
| LOC348926 | 2.326  | 0      |
| LOC348958 | 1.844  | 1.18   |
| LOC349114 | 4.362  | 0.63   |
| LOC349196 | 0.435  | 0      |
| LOC349448 | 2.836  | 0      |
| LOC352905 | 0.928  | 0      |
| LOC353194 | 5.166  | 0      |
| LOC353196 | 1.407  | 0      |
| LOC359724 | 1.848  | 219.07 |
| LOC359791 | 15.416 | 0.01   |
| LOC359792 | 1.376  | 2.23   |
| LOC359793 | 2.241  | 0.18   |
| LOC359794 | 1.231  | 0      |
| LOC359795 | 0.432  | 0      |
| LOC359798 | 2.102  | 0.04   |
| LOC359800 | 1.77   | 1.01   |
| LOC359819 | 0.48   | 0.41   |
| LOC359996 | 1.92   | 0      |
| LOC359997 | 0.335  | 9.75   |
| LOC359998 | 0.606  | 0      |

|           |        |      |
|-----------|--------|------|
| LOC359999 | 0.606  | 0    |
| LOC360009 | 0.933  | 0    |
| LOC360014 | 1.036  | 0    |
| LOC360015 | 63.721 | 0.01 |
| LOC360016 | 3.493  | 0    |
| LOC360017 | 3.494  | 0    |
| LOC360018 | 0.773  | 0    |
| LOC360020 | 13.416 | 0    |
| LOC360022 | 0.773  | 0    |
| LOC360024 | 2.917  | 0    |
| LOC360025 | 1.383  | 0    |
| LOC360026 | 1.383  | 0    |
| LOC360027 | 2.926  | 0    |
| LOC360028 | 5.777  | 0.05 |
| LOC360029 | 0.191  | 0    |
| LOC374395 | 0.864  | 18.9 |
| LOC374443 | 12.978 | 1.09 |
| LOC374491 | 20.185 | 0    |
| LOC374569 | 2.03   | 0    |
| LOC374920 | 2.278  | 2.12 |
| LOC374973 | 0.921  | 0.21 |
| LOC375010 | 2.535  | 0    |
| LOC375133 | 2.018  | 4.71 |
| LOC375190 | 2.28   | 0.56 |
| LOC375251 | 1.11   | 0.71 |
| LOC375295 | 2.532  | 0    |
| LOC375350 | 0.782  | 5.31 |
| LOC375449 | 1.066  | 0.09 |
| LOC375748 | 2.84   | 2.09 |
| LOC376475 | 5.833  | 0.53 |
| LOC376693 | 0.968  | 1.63 |
| LOC376818 | 1.944  | 0    |
| LOC386610 | 1.944  | 0    |
| LOC386728 | 3.247  | 0    |
| LOC387359 | 14.975 | 0    |
| LOC387360 | 9.135  | 0    |
| LOC387361 | 9.139  | 0    |
| LOC387364 | 12.286 | 0    |
| LOC387601 | 1.644  | 0    |
| LOC387646 | 3.262  | 0.45 |
| LOC387647 | 2.717  | 3.24 |
| LOC387654 | 0.9    | 0.88 |
| LOC387703 | 4.653  | 1.21 |
| LOC387720 | 2.435  | 0    |
| LOC387723 | 0.634  | 0.16 |
| LOC387745 | 20.342 | 0.01 |
| LOC387753 | 0.601  | 0.99 |
| LOC387758 | 3.007  | 0    |
| LOC387761 | 0.684  | 0    |
| LOC387763 | 2.487  | 0.16 |



|           |        |       |
|-----------|--------|-------|
| LOC387770 | 30.898 | 0     |
| LOC387787 | 1.897  | 0.62  |
| LOC387791 | 13.822 | 0.09  |
| LOC387804 | 1.312  | 0     |
| LOC387820 | 18.375 | 1.43  |
| LOC387825 | 60.535 | 0.06  |
| LOC387826 | 0.594  | 0     |
| LOC387845 | 1.413  | 5.32  |
| LOC387856 | 2.311  | 0.09  |
| LOC387867 | 1.061  | 0.75  |
| LOC387869 | 0.377  | 0     |
| LOC387876 | 1.164  | 0     |
| LOC387885 | 0.918  | 0     |
| LOC387890 | 0.695  | 0     |
| LOC387895 | 1.162  | 0     |
| LOC387911 | 1.002  | 0     |
| LOC387924 | 8.827  | 0.12  |
| LOC387927 | 0.703  | 0     |
| LOC387933 | 1.218  | 0.24  |
| LOC387934 | 0.703  | 0.14  |
| LOC387939 | 0.425  | 0     |
| LOC387941 | 0.901  | 0     |
| LOC387978 | 0.734  | 0     |
| LOC388002 | 0.637  | 0     |
| LOC388022 | 2.089  | 0.19  |
| LOC388076 | 0.719  | 4.4   |
| LOC388104 | 1.372  | 0.65  |
| LOC388122 | 0.948  | 0.31  |
| LOC388135 | 1.344  | 0     |
| LOC388147 | 0.719  | 14.04 |
| LOC388152 | 1.371  | 0     |
| LOC388153 | 0.491  | 0     |
| LOC388160 | 0.495  | 0.2   |
| LOC388161 | 5.435  | 0     |
| LOC388163 | 0.496  | 0.2   |
| LOC388177 | 1.037  | 5.63  |
| LOC388181 | 1.598  | 0.5   |
| LOC388194 | 24.848 | 0     |
| LOC388199 | 1.209  | 0.08  |
| LOC388210 | 1.344  | 0.44  |
| LOC388237 | 2.728  | 0.14  |
| LOC388242 | 4.091  | 1.04  |
| LOC388248 | 45.643 | 0     |
| LOC388255 | 0.522  | 0     |
| LOC388259 | 0.94   | 0     |
| LOC388272 | 1.383  | 1.43  |
| LOC388279 | 0.917  | 0.32  |
| LOC388282 | 1.29   | 0     |
| LOC388284 | 1.714  | 2.02  |
| LOC388312 | 3.103  | 0.1   |

|           |        |        |
|-----------|--------|--------|
| LOC388323 | 1.023  | 0      |
| LOC388333 | 0.845  | 0      |
| LOC388335 | 3.092  | 3.23   |
| LOC388339 | 0.546  | 610.47 |
| LOC388344 | 0.77   | 833.51 |
| LOC388381 | 0.465  | 0.21   |
| LOC388401 | 0.842  | 0.35   |
| LOC388419 | 1.678  | 0      |
| LOC388436 | 0.532  | 0      |
| LOC388438 | 3.126  | 0      |
| LOC388444 | 1.367  | 0      |
| LOC388458 | 1.006  | 0      |
| LOC388459 | 0.717  | 0      |
| LOC388460 | 0.844  | 0.12   |
| LOC388474 | 1.044  | 0.85   |
| LOC388503 | 3.525  | 0      |
| LOC388514 | 21.24  | 0      |
| LOC388523 | 31.042 | 0.02   |
| LOC388524 | 1.397  | 70.89  |
| LOC388532 | 0.802  | 0.37   |
| LOC388553 | 1.776  | 0      |
| LOC388556 | 0.699  | 242.32 |
| LOC388559 | 1.77   | 1.11   |
| LOC388564 | 2.277  | 0.96   |
| LOC388572 | 1.992  | 0      |
| LOC388579 | 1.03   | 0      |
| LOC388588 | 0.73   | 0.41   |
| LOC388610 | 1.716  | 0      |
| LOC388621 | 0.633  | 0.78   |
| LOC388630 | 2.554  | 0      |
| LOC388692 | 3.389  | 3.1    |
| LOC388707 | 1.059  | 1.49   |
| LOC388720 | 0.588  | 33.99  |
| LOC388734 | 1.191  | 0.83   |
| LOC388743 | 1.426  | 0      |
| LOC388780 | 0.62   | 0      |
| LOC388789 | 0.605  | 64.59  |
| LOC388795 | 3.253  | 0.06   |
| LOC388813 | 1.063  | 0      |
| LOC388814 | 0.849  | 13.05  |
| LOC388817 | 2.655  | 30.74  |
| LOC388820 | 1.05   | 0      |
| LOC388849 | 1.267  | 0.86   |
| LOC388882 | 1.578  | 0      |
| LOC388885 | 0.561  | 0.88   |
| LOC388906 | 0.563  | 0      |
| LOC388907 | 1.031  | 76.48  |
| LOC388915 | 1.091  | 0      |
| LOC388923 | 1.114  | 0.27   |
| LOC388925 | 1.345  | 0.15   |

|           |        |         |
|-----------|--------|---------|
| LOC388931 | 1.508  | 0.13    |
| LOC388946 | 1.137  | 0       |
| LOC388948 | 1.029  | 0.68    |
| LOC388955 | 2.779  | 0.07    |
| LOC388963 | 3.074  | 0.48    |
| LOC388965 | 1.222  | 0.48    |
| LOC388969 | 3.125  | 9.18    |
| LOC388996 | 33.777 | 0.04    |
| LOC389000 | 1.495  | 0       |
| LOC389024 | 1.219  | 0.16    |
| LOC389033 | 0.401  | 0       |
| LOC389043 | 1.861  | 0       |
| LOC389049 | 44.326 | 0.12    |
| LOC389053 | 1.944  | 5.34    |
| LOC389072 | 2.315  | 1.16    |
| LOC389073 | 1.835  | 0       |
| LOC389101 | 5.421  | 0.12    |
| LOC389105 | 3.035  | 0.62    |
| LOC389118 | 1.188  | 0.08    |
| LOC389120 | 7.533  | 0       |
| LOC389124 | 0.512  | 0       |
| LOC389127 | 0.686  | 0       |
| LOC389137 | 2.069  | 0.91    |
| LOC389141 | 1.033  | 0.38    |
| LOC389151 | 1.896  | 0       |
| LOC389156 | 0.537  | 0.19    |
| LOC389160 | 55.476 | 0       |
| LOC389168 | 1.763  | 7.69    |
| LOC389173 | 1.645  | 0       |
| LOC389174 | 0.831  | 0       |
| LOC389179 | 1.388  | 3.14    |
| LOC389199 | 1.296  | 0       |
| LOC389203 | 1.207  | 4.59    |
| LOC389207 | 0.991  | 0       |
| LOC389217 | 1.158  | 0.25    |
| LOC389223 | 1.414  | 4.13    |
| LOC389230 | 0.533  | 0       |
| LOC389240 | 0.801  | 90.29   |
| LOC389246 | 1.076  | 0.55    |
| LOC389249 | 1.686  | 4.87    |
| LOC389257 | 1.573  | 0.88    |
| LOC389286 | 0.833  | 0       |
| LOC389293 | 2.373  | 0.63    |
| LOC389300 | 0.609  | 0       |
| LOC389322 | 4.574  | 5.08    |
| LOC389328 | 0.987  | 0.1     |
| LOC389332 | 1.696  | 0       |
| LOC389333 | 3.163  | 0.78    |
| LOC389342 | 0.778  | 1011.76 |
| LOC389365 | 0.65   | 0       |

|           |        |        |
|-----------|--------|--------|
| LOC389369 | 0.719  | 0      |
| LOC389370 | 0.758  | 0      |
| LOC389386 | 1.616  | 2.51   |
| LOC389395 | 1.546  | 0.06   |
| LOC389404 | 0.632  | 0.78   |
| LOC389428 | 7.179  | 1.74   |
| LOC389458 | 1.076  | 1.48   |
| LOC389465 | 5.56   | 0.32   |
| LOC389493 | 10.483 | 0.01   |
| LOC389517 | 4.542  | 0.09   |
| LOC389523 | 2.682  | 0.41   |
| LOC389541 | 1.397  | 34.42  |
| LOC389607 | 3.258  | 0.28   |
| LOC389633 | 3.011  | 0      |
| LOC389634 | 3.033  | 0      |
| LOC389641 | 1.97   | 0.25   |
| LOC389644 | 3.243  | 13.42  |
| LOC389651 | 3.918  | 0      |
| LOC389652 | 35.593 | 0.01   |
| LOC389654 | 2.036  | 0      |
| LOC389655 | 0.47   | 3.16   |
| LOC389662 | 65.429 | 0.01   |
| LOC389676 | 0.588  | 0      |
| LOC389705 | 23.58  | 0.03   |
| LOC389727 | 1.371  | 0      |
| LOC389740 | 8.767  | 0      |
| LOC389747 | 16.988 | 0      |
| LOC389768 | 6.106  | 0.04   |
| LOC389787 | 0.519  | 366.77 |
| LOC389791 | 2.081  | 0.05   |
| LOC389813 | 2.832  | 0.11   |
| LOC389827 | 0.666  | 0      |
| LOC389832 | 1.94   | 0      |
| LOC389833 | 1.599  | 0      |
| LOC389834 | 4.083  | 0      |
| LOC389842 | 1.048  | 2.83   |
| LOC389844 | 0.975  | 0      |
| LOC389849 | 1.153  | 22.4   |
| LOC389857 | 1.62   | 0      |
| LOC389873 | 1.176  | 1.94   |
| LOC389892 | 10.824 | 0.05   |
| LOC389895 | 0.822  | 0      |
| LOC389901 | 15.867 | 0.8    |
| LOC389904 | 7.476  | 0.06   |
| LOC389906 | 1.078  | 0.73   |
| LOC389935 | 0.938  | 3.59   |
| LOC389936 | 3.209  | 0      |
| LOC389948 | 2.459  | 0.08   |
| LOC389963 | 1.536  | 0      |
| LOC389970 | 1.01   | 0.78   |

|           |        |       |
|-----------|--------|-------|
| LOC389976 | 1.116  | 0     |
| LOC389990 | 0.796  | 1.37  |
| LOC389992 | 0.755  | 0     |
| LOC389997 | 26.293 | 0     |
| LOC390003 | 48.895 | 0     |
| LOC390006 | 0.837  | 0.12  |
| LOC390007 | 2.623  | 2.04  |
| LOC390029 | 2.321  | 0.17  |
| LOC390031 | 0.585  | 0     |
| LOC390033 | 0.585  | 0     |
| LOC390084 | 0.942  | 0     |
| LOC390098 | 0.994  | 0     |
| LOC390099 | 0.966  | 0     |
| LOC390101 | 6.401  | 0     |
| LOC390102 | 1.885  | 0.11  |
| LOC390107 | 0.402  | 75.06 |
| LOC390110 | 1.82   | 0     |
| LOC390158 | 4.513  | 0.37  |
| LOC390183 | 0.843  | 7.51  |
| LOC390203 | 0.953  | 0     |
| LOC390205 | 1.078  | 0     |
| LOC390206 | 0.907  | 0.22  |
| LOC390211 | 0.827  | 0     |
| LOC390213 | 4.584  | 0.6   |
| LOC390218 | 0.456  | 0     |
| LOC390228 | 0.8    | 0.25  |
| LOC390231 | 1.353  | 0     |
| LOC390233 | 6.505  | 0     |
| LOC390239 | 0.465  | 1.28  |
| LOC390243 | 0.732  | 0     |
| LOC390245 | 1.494  | 0     |
| LOC390250 | 0.633  | 3.13  |
| LOC390251 | 0.988  | 3.51  |
| LOC390255 | 0.984  | 4.32  |
| LOC390259 | 1.74   | 0     |
| LOC390282 | 0.618  | 0.16  |
| LOC390285 | 0.522  | 0.38  |
| LOC390294 | 0.941  | 0.74  |
| LOC390297 | 1.419  | 0     |
| LOC390298 | 1.218  | 1.79  |
| LOC390299 | 0.189  | 0     |
| LOC390301 | 1.113  | 0     |
| LOC390306 | 1.708  | 0.29  |
| LOC390308 | 0.632  | 0.31  |
| LOC390311 | 0.813  | 0.49  |
| LOC390314 | 0.518  | 0.57  |
| LOC390332 | 5.651  | 0     |
| LOC390335 | 0.483  | 8.4   |
| LOC390338 | 44.075 | 0     |
| LOC390340 | 3.836  | 0.03  |

|           |         |        |
|-----------|---------|--------|
| LOC390345 | 0.73    | 3.12   |
| LOC390352 | 0.24    | 0.83   |
| LOC390354 | 10.686  | 48.36  |
| LOC390358 | 3.585   | 0      |
| LOC390363 | 11.7    | 0.56   |
| LOC390364 | 0.201   | 0      |
| LOC390378 | 0.485   | 0      |
| LOC390394 | 4.86    | 0.59   |
| LOC390402 | 0.888   | 1.33   |
| LOC390403 | 0.546   | 0      |
| LOC390407 | 1.212   | 3.67   |
| LOC390411 | 0.871   | 0.11   |
| LOC390413 | 0.805   | 0.25   |
| LOC390414 | 1.279   | 0      |
| LOC390415 | 42.753  | 0.04   |
| LOC390418 | 1.302   | 0      |
| LOC390419 | 0.497   | 0      |
| LOC390421 | 0.417   | 0      |
| LOC390424 | 0.411   | 0      |
| LOC390427 | 1.854   | 0      |
| LOC390470 | 1.444   | 0      |
| LOC390472 | 0.879   | 0      |
| LOC390482 | 0.936   | 0      |
| LOC390483 | 13.657  | 0      |
| LOC390501 | 1.09    | 0.18   |
| LOC390503 | 3.82    | 1.04   |
| LOC390530 | 0.579   | 0      |
| LOC390557 | 2.682   | 0      |
| LOC390561 | 92.435  | 0.08   |
| LOC390569 | 170.266 | 0.02   |
| LOC390572 | 0.664   | 0      |
| LOC390576 | 3.807   | 0.26   |
| LOC390578 | 0.941   | 2.52   |
| LOC390580 | 5.404   | 0.18   |
| LOC390581 | 0.575   | 0      |
| LOC390586 | 1.558   | 0.12   |
| LOC390588 | 30.566  | 0.09   |
| LOC390595 | 1.692   | 0.35   |
| LOC390596 | 4.988   | 0.22   |
| LOC390597 | 4.414   | 0      |
| LOC390600 | 0.944   | 0      |
| LOC390601 | 1.526   | 0      |
| LOC390610 | 11.883  | 0.23   |
| LOC390612 | 1.338   | 184.57 |
| LOC390614 | 1.076   | 0      |
| LOC390616 | 2.21    | 0      |
| LOC390617 | 1.302   | 0.15   |
| LOC390618 | 0.732   | 0      |
| LOC390627 | 22.313  | 0      |
| LOC390634 | 1.292   | 0      |

|           |        |       |
|-----------|--------|-------|
| LOC390637 | 1.894  | 1.93  |
| LOC390638 | 22.365 | 0.03  |
| LOC390641 | 0.711  | 0     |
| LOC390643 | 8.031  | 0.32  |
| LOC390660 | 4.455  | 0     |
| LOC390667 | 1.422  | 0     |
| LOC390671 | 0.583  | 35.63 |
| LOC390705 | 0.767  | 0     |
| LOC390712 | 0.558  | 0     |
| LOC390714 | 0.6    | 0     |
| LOC390729 | 0.356  | 1.11  |
| LOC390730 | 0.826  | 0.24  |
| LOC390732 | 27.059 | 0     |
| LOC390738 | 1.161  | 0     |
| LOC390739 | 0.304  | 0.33  |
| LOC390748 | 0.87   | 0.12  |
| LOC390760 | 4.377  | 0     |
| LOC390791 | 0.491  | 0.6   |
| LOC390806 | 0.615  | 0     |
| LOC390811 | 0.201  | 0     |
| LOC390829 | 0.585  | 0     |
| LOC390831 | 0.738  | 0     |
| LOC390834 | 5.146  | 0     |
| LOC390843 | 19.97  | 0     |
| LOC390844 | 1.483  | 1.93  |
| LOC390848 | 0.705  | 5.48  |
| LOC390856 | 0.405  | 0     |
| LOC390857 | 0.839  | 0     |
| LOC390860 | 2.191  | 0.13  |
| LOC390861 | 1.121  | 0.44  |
| LOC390876 | 0.321  | 1.54  |
| LOC390877 | 0.576  | 0     |
| LOC390904 | 10.187 | 0.01  |
| LOC390924 | 3.314  | 1.19  |
| LOC390930 | 15.501 | 0.02  |
| LOC390937 | 1.065  | 0.28  |
| LOC390940 | 1.418  | 16.96 |
| LOC390948 | 0.574  | 0     |
| LOC390949 | 0.437  | 0     |
| LOC390956 | 0.561  | 0     |
| LOC390988 | 2.244  | 0     |
| LOC390993 | 2.047  | 0.14  |
| LOC390996 | 6.563  | 0.03  |
| LOC390997 | 2.695  | 2.2   |
| LOC390998 | 0.852  | 0     |
| LOC391012 | 0.371  | 0.53  |
| LOC391019 | 0.492  | 1.21  |
| LOC391020 | 0.402  | 0.25  |
| LOC391025 | 0.579  | 0     |
| LOC391026 | 15.15  | 0.05  |

|           |        |      |
|-----------|--------|------|
| LOC391033 | 2.451  | 0.4  |
| LOC391037 | 0.675  | 0    |
| LOC391039 | 0.939  | 8.01 |
| LOC391040 | 7.039  | 0.03 |
| LOC391044 | 0.819  | 2.06 |
| LOC391048 | 1.911  | 0.26 |
| LOC391051 | 21.976 | 0    |
| LOC391053 | 0.7    | 2.68 |
| LOC391069 | 1.003  | 0.2  |
| LOC391073 | 5.124  | 0.02 |
| LOC391075 | 0.993  | 0    |
| LOC391076 | 7.706  | 0    |
| LOC391077 | 1.006  | 1.18 |
| LOC391081 | 9.525  | 0    |
| LOC391092 | 1.409  | 0    |
| LOC391099 | 63.316 | 0    |
| LOC391102 | 3.802  | 2.4  |
| LOC391106 | 0.773  | 0    |
| LOC391126 | 0.438  | 1.13 |
| LOC391130 | 0.415  | 8.82 |
| LOC391132 | 6.913  | 0    |
| LOC391135 | 1.413  | 7.21 |
| LOC391136 | 3.335  | 2.2  |
| LOC391137 | 12.585 | 0    |
| LOC391139 | 20.818 | 0.15 |
| LOC391140 | 0.647  | 0.15 |
| LOC391142 | 2.708  | 0    |
| LOC391151 | 0.37   | 0    |
| LOC391155 | 1.614  | 0    |
| LOC391157 | 0.409  | 0.72 |
| LOC391158 | 1.377  | 0.07 |
| LOC391160 | 0.547  | 1.81 |
| LOC391162 | 3.591  | 0.03 |
| LOC391168 | 0.817  | 0.24 |
| LOC391171 | 3.411  | 0    |
| LOC391179 | 1.425  | 0    |
| LOC391181 | 12.91  | 0.03 |
| LOC391183 | 19.626 | 0.01 |
| LOC391205 | 1.101  | 0    |
| LOC391230 | 6.335  | 0    |
| LOC391239 | 9.186  | 0    |
| LOC391242 | 0.678  | 0    |
| LOC391247 | 0.564  | 0.18 |
| LOC391256 | 1.348  | 0    |
| LOC391258 | 3.898  | 0    |
| LOC391265 | 0.126  | 0    |
| LOC391267 | 4.393  | 0.03 |
| LOC391269 | 0.512  | 0.2  |
| LOC391271 | 1.219  | 0    |
| LOC391273 | 0.736  | 5.51 |



|           |        |       |
|-----------|--------|-------|
| LOC391276 | 1.919  | 0.16  |
| LOC391282 | 0.501  | 0     |
| LOC391322 | 0.569  | 4.69  |
| LOC391334 | 1.212  | 0.41  |
| LOC391337 | 5.122  | 0     |
| LOC391343 | 0.648  | 0     |
| LOC391349 | 17.805 | 0.37  |
| LOC391356 | 0.572  | 27.68 |
| LOC391358 | 0.59   | 10.23 |
| LOC391359 | 0.297  | 1.33  |
| LOC391364 | 0.957  | 0.11  |
| LOC391367 | 1.007  | 0.29  |
| LOC391370 | 0.431  | 14    |
| LOC391378 | 9.357  | 0.01  |
| LOC391383 | 1.268  | 0     |
| LOC391387 | 0.874  | 0     |
| LOC391405 | 2.127  | 0     |
| LOC391428 | 12.023 | 0     |
| LOC391429 | 0.381  | 0     |
| LOC391436 | 3.935  | 0.2   |
| LOC391444 | 10.888 | 0     |
| LOC391448 | 9.813  | 0.03  |
| LOC391453 | 4.554  | 0     |
| LOC391458 | 1.279  | 0     |
| LOC391462 | 0.873  | 0.34  |
| LOC391465 | 0.581  | 0     |
| LOC391467 | 2.242  | 0     |
| LOC391470 | 1.242  | 0.96  |
| LOC391472 | 18.808 | 0     |
| LOC391485 | 5.604  | 0     |
| LOC391490 | 5.591  | 0     |
| LOC391491 | 78.835 | 0.01  |
| LOC391504 | 0.509  | 1.16  |
| LOC391508 | 1.392  | 0     |
| LOC391511 | 0.561  | 0.53  |
| LOC391524 | 1.598  | 1.36  |
| LOC391526 | 1.091  | 26.48 |
| LOC391530 | 56.357 | 0     |
| LOC391532 | 0.594  | 0     |
| LOC391533 | 1.434  | 0.2   |
| LOC391539 | 0.695  | 0     |
| LOC391540 | 1.824  | 1.46  |
| LOC391541 | 0.493  | 0     |
| LOC391552 | 5.024  | 0.14  |
| LOC391556 | 0.739  | 0.13  |
| LOC391559 | 0.7    | 0.99  |
| LOC391560 | 0.406  | 0.98  |
| LOC391562 | 5.382  | 3.6   |
| LOC391566 | 7.231  | 0.03  |
| LOC391578 | 3.984  | 0.05  |

|           |        |       |
|-----------|--------|-------|
| LOC391584 | 1.276  | 0     |
| LOC391587 | 1.799  | 0     |
| LOC391589 | 1.363  | 0     |
| LOC391592 | 1.792  | 5.02  |
| LOC391595 | 0.406  | 3.17  |
| LOC391598 | 0.895  | 0.44  |
| LOC391600 | 0.887  | 0     |
| LOC391603 | 0.872  | 0     |
| LOC391609 | 1.209  | 0     |
| LOC391636 | 1.039  | 2.76  |
| LOC391640 | 4.411  | 0     |
| LOC391642 | 1.005  | 0.1   |
| LOC391647 | 1.284  | 0     |
| LOC391648 | 70.234 | 0     |
| LOC391655 | 0.584  | 0.51  |
| LOC391656 | 0.436  | 0.91  |
| LOC391657 | 4.435  | 0.12  |
| LOC391670 | 1.188  | 0.67  |
| LOC391672 | 1.024  | 1.64  |
| LOC391674 | 1.028  | 0.1   |
| LOC391679 | 0.846  | 0     |
| LOC391681 | 2.059  | 0.24  |
| LOC391686 | 0.691  | 1     |
| LOC391689 | 15.944 | 0     |
| LOC391696 | 3.792  | 0.31  |
| LOC391697 | 9.503  | 0     |
| LOC391698 | 8.095  | 0.03  |
| LOC391701 | 0.415  | 2.39  |
| LOC391703 | 25.764 | 0     |
| LOC391706 | 1.892  | 0.58  |
| LOC391707 | 0.394  | 0     |
| LOC391710 | 2.848  | 0     |
| LOC391711 | 7.343  | 0     |
| LOC391713 | 7.44   | 0.01  |
| LOC391718 | 1.392  | 0     |
| LOC391719 | 0.591  | 1.01  |
| LOC391722 | 1.134  | 0.17  |
| LOC391738 | 0.465  | 0.21  |
| LOC391739 | 1.596  | 10.41 |
| LOC391741 | 1.132  | 12.76 |
| LOC391742 | 0.552  | 0     |
| LOC391744 | 0.443  | 0     |
| LOC391746 | 0.597  | 0     |
| LOC391747 | 0.597  | 0     |
| LOC391749 | 0.597  | 0     |
| LOC391761 | 0.597  | 0     |
| LOC391763 | 0.597  | 0     |
| LOC391764 | 0.756  | 0     |
| LOC391765 | 0.443  | 0     |
| LOC391766 | 0.597  | 0     |

|           |         |        |
|-----------|---------|--------|
| LOC391767 | 0.594   | 0      |
| LOC391768 | 0.596   | 0      |
| LOC391769 | 0.411   | 0      |
| LOC391771 | 0.927   | 0.11   |
| LOC391774 | 0.637   | 2.64   |
| LOC391777 | 0.863   | 16.05  |
| LOC391798 | 33.177  | 0      |
| LOC391803 | 1.234   | 0      |
| LOC391804 | 0.969   | 0.71   |
| LOC391807 | 210.938 | 0      |
| LOC391810 | 4.787   | 0.04   |
| LOC391811 | 1.422   | 1.6    |
| LOC391813 | 1.943   | 0      |
| LOC391819 | 1.322   | 0      |
| LOC391824 | 6.396   | 0.02   |
| LOC391825 | 0.473   | 0      |
| LOC391827 | 15.913  | 0      |
| LOC391828 | 0.406   | 560.48 |
| LOC391833 | 0.563   | 1.06   |
| LOC391834 | 0.718   | 0.28   |
| LOC391836 | 11.373  | 0      |
| LOC391844 | 59.324  | 0.07   |
| LOC391845 | 0.451   | 0.88   |
| LOC391847 | 42.237  | 0.03   |
| LOC391849 | 25.946  | 4.65   |
| LOC391850 | 7.28    | 0.05   |
| LOC391859 | 0.591   | 0      |
| LOC392005 | 54.437  | 0.02   |
| LOC392008 | 0.38    | 0.78   |
| LOC392027 | 2.404   | 0.7    |
| LOC392030 | 0.706   | 1.26   |
| LOC392100 | 1.321   | 0.07   |
| LOC392145 | 11.753  | 0      |
| LOC392180 | 0.999   | 0      |
| LOC392181 | 1.057   | 0.19   |
| LOC392187 | 1.201   | 0      |
| LOC392188 | 1.593   | 0      |
| LOC392193 | 0.647   | 0.61   |
| LOC392196 | 1.2     | 0      |
| LOC392197 | 1.593   | 0      |
| LOC392206 | 0.659   | 17.71  |
| LOC392209 | 3.616   | 0.05   |
| LOC392214 | 1.285   | 0      |
| LOC392217 | 2.682   | 0      |
| LOC392221 | 0.501   | 0      |
| LOC392222 | 0.267   | 0      |
| LOC392225 | 1.373   | 0      |
| LOC392226 | 43.977  | 0.02   |
| LOC392227 | 0.494   | 0      |
| LOC392232 | 92.212  | 0      |

|           |         |       |
|-----------|---------|-------|
| LOC392242 | 3.56    | 0     |
| LOC392262 | 0.246   | 0     |
| LOC392264 | 51.675  | 0     |
| LOC392265 | 0.93    | 0.11  |
| LOC392266 | 6.831   | 0.06  |
| LOC392267 | 2.234   | 0.22  |
| LOC392268 | 3.096   | 0     |
| LOC392271 | 0.408   | 3.39  |
| LOC392281 | 0.985   | 3.12  |
| LOC392282 | 0.613   | 3.88  |
| LOC392285 | 14.682  | 0.01  |
| LOC392288 | 1.206   | 0.66  |
| LOC392292 | 1.608   | 0     |
| LOC392298 | 273.231 | 0     |
| LOC392301 | 12.459  | 0.06  |
| LOC392310 | 0.842   | 0     |
| LOC392322 | 139.89  | 0     |
| LOC392334 | 3.757   | 0     |
| LOC392335 | 8.844   | 0     |
| LOC392343 | 14.007  | 0     |
| LOC392352 | 4.38    | 0     |
| LOC392358 | 0.741   | 4.81  |
| LOC392364 | 2.313   | 0     |
| LOC392368 | 7.673   | 0     |
| LOC392371 | 4.083   | 0     |
| LOC392374 | 1.015   | 0     |
| LOC392382 | 23.47   | 0.03  |
| LOC392387 | 1.3     | 1.52  |
| LOC392424 | 0.61    | 36.5  |
| LOC392425 | 0.455   | 0     |
| LOC392426 | 2.084   | 0.09  |
| LOC392435 | 4.469   | 0     |
| LOC392436 | 0.439   | 0     |
| LOC392437 | 0.743   | 11.32 |
| LOC392439 | 0.691   | 0     |
| LOC392440 | 0.951   | 0     |
| LOC392442 | 22.272  | 0.05  |
| LOC392443 | 6.605   | 0     |
| LOC392451 | 4.765   | 0.27  |
| LOC392452 | 0.86    | 0     |
| LOC392454 | 0.783   | 2.03  |
| LOC392456 | 1.631   | 1.33  |
| LOC392459 | 5.697   | 0     |
| LOC392465 | 0.474   | 0     |
| LOC392473 | 33.6    | 0     |
| LOC392477 | 0.966   | 0     |
| LOC392479 | 51.495  | 0     |
| LOC392481 | 1.749   | 0.68  |
| LOC392485 | 0.987   | 1.2   |
| LOC392489 | 0.574   | 0.34  |

|           |         |       |
|-----------|---------|-------|
| LOC392497 | 0.761   | 7.41  |
| LOC392501 | 0.436   | 0     |
| LOC392505 | 0.863   | 0.23  |
| LOC392508 | 1.886   | 3.78  |
| LOC392510 | 1.014   | 0     |
| LOC392516 | 13.966  | 0     |
| LOC392520 | 0.606   | 0     |
| LOC392522 | 4.479   | 0.04  |
| LOC392525 | 0.942   | 0     |
| LOC392528 | 3.231   | 0.03  |
| LOC392529 | 0.513   | 0     |
| LOC392536 | 1.953   | 0     |
| LOC392538 | 0.914   | 0.21  |
| LOC392539 | 3.659   | 0.13  |
| LOC392542 | 0.534   | 0     |
| LOC392543 | 1.267   | 1.1   |
| LOC392545 | 0.629   | 0     |
| LOC392547 | 5.969   | 0.45  |
| LOC392552 | 1.431   | 0     |
| LOC392555 | 1.124   | 0     |
| LOC392556 | 4.331   | 0     |
| LOC392557 | 0.591   | 39.34 |
| LOC392563 | 1.701   | 0     |
| LOC392597 | 2.122   | 0     |
| LOC392603 | 5.119   | 0     |
| LOC392617 | 5.186   | 6.46  |
| LOC392631 | 2.349   | 0     |
| LOC392635 | 5.56    | 0     |
| LOC392713 | 4.562   | 0     |
| LOC392748 | 0.496   | 3.59  |
| LOC392781 | 1.798   | 0.33  |
| LOC392787 | 11.331  | 0     |
| LOC392843 | 29.503  | 0     |
| LOC392871 | 1.22    | 0     |
| LOC392878 | 0.38    | 0     |
| LOC392900 | 2.404   | 0.04  |
| LOC392979 | 0.501   | 0     |
| LOC392982 | 0.585   | 0     |
| LOC393062 | 11.746  | 0     |
| LOC393076 | 163.618 | 0     |
| LOC393078 | 31.518  | 0     |
| LOC399655 | 3.966   | 2.82  |
| LOC399706 | 2.381   | 0     |
| LOC399744 | 3.711   | 0.88  |
| LOC399748 | 1.633   | 6.66  |
| LOC399761 | 1.48    | 0     |
| LOC399774 | 4.645   | 0.02  |
| LOC399783 | 19.049  | 0     |
| LOC399804 | 1.08    | 1.28  |
| LOC399815 | 1.419   | 0.07  |

|           |        |       |
|-----------|--------|-------|
| LOC399818 | 2.579  | 4.61  |
| LOC399829 | 0.723  | 0     |
| LOC399839 | 2.682  | 0     |
| LOC399881 | 50.362 | 0.01  |
| LOC399888 | 1.435  | 1.8   |
| LOC399898 | 4.292  | 0     |
| LOC399900 | 1.697  | 0.35  |
| LOC399937 | 2.05   | 0     |
| LOC399939 | 1.651  | 0     |
| LOC399940 | 2.05   | 0     |
| LOC399942 | 1.616  | 3.85  |
| LOC399947 | 2.338  | 0     |
| LOC399950 | 1.082  | 0     |
| LOC399957 | 4.476  | 0     |
| LOC399965 | 1.705  | 0     |
| LOC399988 | 4.189  | 0.07  |
| LOC399994 | 3.966  | 2.54  |
| LOC400011 | 3.628  | 2.02  |
| LOC400013 | 1.746  | 8.5   |
| LOC400026 | 14.377 | 0.02  |
| LOC400027 | 2.202  | 14.11 |
| LOC400036 | 2.585  | 0.31  |
| LOC400058 | 1.294  | 1.07  |
| LOC400061 | 1.003  | 0.69  |
| LOC400064 | 0.736  | 25.4  |
| LOC400094 | 2.463  | 0.04  |
| LOC400099 | 2.046  | 1.89  |
| LOC400120 | 2.876  | 0     |
| LOC400126 | 3.362  | 8.92  |
| LOC400129 | 1.3    | 6.62  |
| LOC400141 | 0.934  | 0.74  |
| LOC400174 | 1.175  | 0     |
| LOC400236 | 1.882  | 0.47  |
| LOC400258 | 1.847  | 0     |
| LOC400347 | 1.118  | 0.89  |
| LOC400352 | 14.013 | 0     |
| LOC400385 | 20.125 | 0.05  |
| LOC400389 | 0.651  | 0.6   |
| LOC400403 | 31.195 | 0.23  |
| LOC400406 | 24.082 | 0.07  |
| LOC400419 | 46.571 | 0     |
| LOC400446 | 6.363  | 0.27  |
| LOC400451 | 2.627  | 6.97  |
| LOC400455 | 0.821  | 2.05  |
| LOC400456 | 0.931  | 0     |
| LOC400464 | 1.931  | 1.89  |
| LOC400499 | 3.552  | 0.05  |
| LOC400506 | 3.817  | 0.34  |
| LOC400553 | 0.703  | 0.28  |
| LOC400566 | 1.779  | 0     |

|           |        |      |
|-----------|--------|------|
| LOC400578 | 4.704  | 0    |
| LOC400581 | 1.345  | 1.54 |
| LOC400592 | 12.175 | 1.5  |
| LOC400652 | 0.741  | 2.67 |
| LOC400657 | 2.399  | 2.27 |
| LOC400686 | 5.302  | 0.17 |
| LOC400696 | 2.562  | 0    |
| LOC400707 | 1.991  | 0    |
| LOC400723 | 1.289  | 0    |
| LOC400750 | 4.296  | 0.71 |
| LOC400752 | 1.71   | 0.06 |
| LOC400756 | 1.277  | 0.39 |
| LOC400769 | 0.912  | 0.76 |
| LOC400796 | 1.399  | 0    |
| LOC400831 | 1.604  | 0    |
| LOC400856 | 2.201  | 0    |
| LOC400879 | 4.778  | 2.01 |
| LOC400891 | 3.226  | 0    |
| LOC400924 | 2.272  | 5.05 |
| LOC400927 | 39.945 | 0.32 |
| LOC400950 | 3.715  | 0.11 |
| LOC400958 | 3.029  | 0    |
| LOC400960 | 0.997  | 0.4  |
| LOC400963 | 0.973  | 1.22 |
| LOC400965 | 2.617  | 0.04 |
| LOC400968 | 4.637  | 0    |
| LOC400986 | 2.29   | 0.26 |
| LOC400987 | 1.298  | 0.76 |
| LOC401007 | 2.163  | 0    |
| LOC401010 | 2.723  | 0.94 |
| LOC401013 | 2.242  | 0.09 |
| LOC401018 | 2.444  | 0    |
| LOC401021 | 1.816  | 0    |
| LOC401052 | 1.897  | 0.47 |
| LOC401068 | 2.06   | 0.96 |
| LOC401072 | 4.064  | 0    |
| LOC401074 | 1.008  | 1.67 |
| LOC401076 | 2.157  | 6.93 |
| LOC401089 | 4.075  | 0    |
| LOC401097 | 0.759  | 0    |
| LOC401098 | 2.614  | 0    |
| LOC401115 | 0.464  | 0.85 |
| LOC401127 | 1.403  | 0.63 |
| LOC401131 | 6.056  | 0    |
| LOC401137 | 3.072  | 0    |
| LOC401152 | 1.45   | 7.09 |
| LOC401180 | 0.96   | 0.31 |
| LOC401218 | 1.738  | 0.05 |
| LOC401220 | 2.891  | 0    |
| LOC401222 | 2.526  | 0    |

|           |        |       |
|-----------|--------|-------|
| LOC401233 | 2.851  | 0.03  |
| LOC401242 | 2.785  | 0     |
| LOC401252 | 10.372 | 0.01  |
| LOC401280 | 3.836  | 0     |
| LOC401286 | 4.518  | 0     |
| LOC401296 | 2.846  | 0.11  |
| LOC401308 | 4.548  | 2.2   |
| LOC401316 | 4.972  | 14.35 |
| LOC401317 | 2.288  | 0.13  |
| LOC401321 | 7.464  | 0.26  |
| LOC401329 | 9.261  | 0.01  |
| LOC401357 | 6.708  | 0.02  |
| LOC401393 | 0.681  | 1.31  |
| LOC401397 | 2.302  | 0.82  |
| LOC401398 | 4.294  | 0     |
| LOC401399 | 7.304  | 0.08  |
| LOC401410 | 5.85   | 0     |
| LOC401431 | 5.842  | 0.1   |
| LOC401433 | 5.816  | 3.46  |
| LOC401442 | 1.827  | 0.21  |
| LOC401447 | 1.593  | 0     |
| LOC401497 | 1.966  | 0     |
| LOC401498 | 3.581  | 0     |
| LOC401525 | 0.372  | 0     |
| LOC401533 | 2.672  | 0.37  |
| LOC401537 | 0.887  | 0.56  |
| LOC401565 | 1.124  | 1.67  |
| LOC401577 | 1.023  | 9.28  |
| LOC401602 | 2.798  | 1.66  |
| LOC401629 | 0.462  | 0     |
| LOC401630 | 0.46   | 0     |
| LOC401640 | 0.801  | 4.08  |
| LOC401646 | 2.883  | 0     |
| LOC401648 | 1.233  | 0     |
| LOC401650 | 0.684  | 0     |
| LOC401676 | 48.693 | 0.03  |
| LOC401677 | 0.495  | 0.8   |
| LOC401679 | 23.596 | 0.12  |
| LOC401703 | 1.032  | 3.36  |
| LOC401705 | 0.755  | 0     |
| LOC401708 | 1.121  | 0.53  |
| LOC401717 | 15.768 | 0.56  |
| LOC401720 | 2.436  | 0     |
| LOC401721 | 3.363  | 0.03  |
| LOC401725 | 0.86   | 0.46  |
| LOC401730 | 1.448  | 0.13  |
| LOC401744 | 1.279  | 2.09  |
| LOC401767 | 91.04  | 0.02  |
| LOC401770 | 0.363  | 7.63  |
| LOC401772 | 9.638  | 0.04  |



|           |        |        |
|-----------|--------|--------|
| LOC401777 | 19.515 | 0.1    |
| LOC401805 | 4.121  | 0.24   |
| LOC401817 | 0.515  | 0.58   |
| LOC401822 | 12.755 | 0.01   |
| LOC401825 | 0.895  | 0.33   |
| LOC401847 | 0.516  | 0      |
| LOC401859 | 0.501  | 0      |
| LOC401863 | 0.664  | 106.54 |
| LOC401864 | 1.768  | 0.06   |
| LOC401865 | 2.925  | 0.04   |
| LOC401895 | 0.375  | 0.27   |
| LOC401898 | 3.381  | 0.12   |
| LOC401904 | 0.964  | 0.41   |
| LOC401911 | 3.951  | 0.1    |
| LOC401913 | 0.576  | 0.17   |
| LOC401914 | 1.304  | 0.38   |
| LOC401945 | 0.702  | 0      |
| LOC401957 | 0.618  | 13.29  |
| LOC401959 | 0.861  | 0      |
| LOC401960 | 1.892  | 0.21   |
| LOC401974 | 0.898  | 0.22   |
| LOC401975 | 0.846  | 0.82   |
| LOC401980 | 1.224  | 0      |
| LOC401981 | 3.976  | 0.22   |
| LOC401982 | 0.956  | 0.73   |
| LOC402026 | 0.604  | 5.9    |
| LOC402036 | 1.089  | 0.09   |
| LOC402057 | 0.54   | 565.04 |
| LOC402069 | 0.44   | 0      |
| LOC402076 | 8.157  | 0      |
| LOC402093 | 1.281  | 0.08   |
| LOC402096 | 26.624 | 0.04   |
| LOC402100 | 34.743 | 0      |
| LOC402102 | 6.269  | 0      |
| LOC402110 | 2.606  | 0      |
| LOC402112 | 1.195  | 1.33   |
| LOC402116 | 4.257  | 0.37   |
| LOC402117 | 1.231  | 0      |
| LOC402120 | 0.342  | 0.58   |
| LOC402122 | 0.156  | 0      |
| LOC402123 | 0.532  | 0      |
| LOC402125 | 4.725  | 0      |
| LOC402134 | 7.996  | 0      |
| LOC402143 | 1.943  | 1.78   |
| LOC402145 | 0.351  | 0      |
| LOC402146 | 1.429  | 1.18   |
| LOC402149 | 7.279  | 35.23  |
| LOC402150 | 0.762  | 5.71   |
| LOC402152 | 0.74   | 0      |
| LOC402164 | 1.593  | 0      |

|           |         |       |
|-----------|---------|-------|
| LOC402175 | 0.42    | 3.3   |
| LOC402176 | 1.763   | 0.45  |
| LOC402182 | 2.014   | 0     |
| LOC402184 | 0.398   | 0.25  |
| LOC402191 | 3.514   | 0.73  |
| LOC402192 | 0.711   | 0.7   |
| LOC402198 | 56.663  | 0     |
| LOC402199 | 0.597   | 0     |
| LOC402207 | 0.597   | 0     |
| LOC402213 | 0.709   | 0     |
| LOC402214 | 0.616   | 2.25  |
| LOC402216 | 1.277   | 45.25 |
| LOC402217 | 0.546   | 1.27  |
| LOC402219 | 38.162  | 0.65  |
| LOC402221 | 1.105   | 0.27  |
| LOC402222 | 1.966   | 0.25  |
| LOC402226 | 12.371  | 0.11  |
| LOC402229 | 1.911   | 0.62  |
| LOC402230 | 3.392   | 0.26  |
| LOC402232 | 0.858   | 0     |
| LOC402233 | 4.701   | 0     |
| LOC402269 | 1.506   | 0     |
| LOC402273 | 32.566  | 0     |
| LOC402279 | 1.134   | 0     |
| LOC402287 | 0.897   | 0.33  |
| LOC402329 | 1.201   | 0     |
| LOC402342 | 3.247   | 1.1   |
| LOC402359 | 109.665 | 0.06  |
| LOC402360 | 0.902   | 0     |
| LOC402375 | 0.291   | 72.08 |
| LOC402377 | 1.275   | 1.48  |
| LOC402382 | 0.675   | 0     |
| LOC402394 | 2.284   | 0.13  |
| LOC402397 | 3.379   | 0.53  |
| LOC402408 | 3.195   | 0.22  |
| LOC402420 | 11.021  | 0.84  |
| LOC402422 | 1.334   | 0     |
| LOC402425 | 1.358   | 0.29  |
| LOC402429 | 31.683  | 0     |
| LOC402505 | 20.367  | 0.17  |
| LOC402509 | 4.547   | 0     |
| LOC402569 | 3.207   | 0     |
| LOC402573 | 2.008   | 1.33  |
| LOC402634 | 0.762   | 0     |
| LOC402635 | 6.842   | 0.07  |
| LOC402641 | 15.719  | 0.07  |
| LOC402643 | 1.384   | 0.36  |
| LOC402644 | 0.992   | 0     |
| LOC402676 | 0.524   | 0     |
| LOC402679 | 1.884   | 0     |

|           |        |        |
|-----------|--------|--------|
| LOC402682 | 1.914  | 0.05   |
| LOC402716 | 17.088 | 0.01   |
| LOC407835 | 3.474  | 4.5    |
| LOC414751 | 4.634  | 0      |
| LOC414752 | 7.767  | 0      |
| LOC414753 | 10.816 | 0      |
| LOC414754 | 1.909  | 1.97   |
| LOC432369 | 0.368  | 55.39  |
| LOC4328   | 1.938  | 1.53   |
| LOC439945 | 5.892  | 0      |
| LOC439949 | 1.403  | 0      |
| LOC439950 | 0.554  | 0      |
| LOC439951 | 1.37   | 0.58   |
| LOC439953 | 0.71   | 0      |
| LOC439954 | 0.745  | 0.4    |
| LOC439957 | 0.435  | 0.46   |
| LOC439962 | 2.668  | 0.07   |
| LOC439985 | 2.57   | 0      |
| LOC439992 | 1.532  | 0.97   |
| LOC439994 | 2.672  | 1.67   |
| LOC440013 | 2.619  | 0      |
| LOC440014 | 2.682  | 0      |
| LOC440015 | 1.255  | 2.84   |
| LOC440017 | 2.671  | 0      |
| LOC440027 | 0.546  | 1.27   |
| LOC440031 | 0.854  | 0      |
| LOC440040 | 1.828  | 0      |
| LOC440041 | 7.941  | 0      |
| LOC440043 | 2.359  | 0      |
| LOC440055 | 0.559  | 956.8  |
| LOC440059 | 15.137 | 0      |
| LOC440061 | 6.817  | 0      |
| LOC440063 | 0.704  | 0      |
| LOC440067 | 7.522  | 0.01   |
| LOC440083 | 1.161  | 0      |
| LOC440087 | 2.104  | 0      |
| LOC440093 | 1.057  | 116.72 |
| LOC440104 | 4.437  | 17.37  |
| LOC440125 | 2.977  | 0.23   |
| LOC440131 | 0.696  | 0.28   |
| LOC440142 | 4.559  | 0.41   |
| LOC440157 | 2.761  | 2.4    |
| LOC440180 | 1.817  | 2.34   |
| LOC440181 | 0.827  | 0      |
| LOC440224 | 24.544 | 0      |
| LOC440225 | 28.167 | 0.01   |
| LOC440233 | 2.44   | 0      |
| LOC440243 | 3.63   | 0      |
| LOC440248 | 5.7    | 2.73   |
| LOC440268 | 0.678  | 0      |

|           |        |        |
|-----------|--------|--------|
| LOC440278 | 12.014 | 0.16   |
| LOC440287 | 1.155  | 0      |
| LOC440292 | 0.984  | 1.11   |
| LOC440295 | 3.218  | 0      |
| LOC440296 | 0.491  | 0      |
| LOC440297 | 22.168 | 0      |
| LOC440300 | 19.781 | 0.02   |
| LOC440302 | 0.49   | 0      |
| LOC440304 | 17.066 | 0      |
| LOC440311 | 1.595  | 144.53 |
| LOC440313 | 3.846  | 0      |
| LOC440320 | 3.585  | 0      |
| LOC440330 | 0.71   | 0      |
| LOC440335 | 0.349  | 0      |
| LOC440337 | 1.919  | 0      |
| LOC440338 | 3.853  | 0      |
| LOC440345 | 7.602  | 1.07   |
| LOC440348 | 1.089  | 4.73   |
| LOC440350 | 1.474  | 0      |
| LOC440353 | 24.527 | 0.1    |
| LOC440354 | 42.485 | 0.23   |
| LOC440359 | 1.869  | 120.48 |
| LOC440361 | 0.537  | 0      |
| LOC440366 | 12.305 | 0      |
| LOC440386 | 3.886  | 0.16   |
| LOC440389 | 0.685  | 0      |
| LOC440396 | 1.637  | 0.42   |
| LOC440456 | 4.642  | 12.6   |
| LOC440459 | 4.881  | 0.11   |
| LOC440461 | 6.672  | 0.08   |
| LOC440487 | 0.523  | 1.7    |
| LOC440489 | 1.332  | 3.41   |
| LOC440490 | 0.189  | 7.85   |
| LOC440491 | 0.801  | 2.72   |
| LOC440498 | 1.367  | 19.32  |
| LOC440508 | 5.462  | 0      |
| LOC440511 | 0.984  | 0.8    |
| LOC440514 | 2.91   | 9.65   |
| LOC440518 | 8.905  | 0      |
| LOC440525 | 1.134  | 9.33   |
| LOC440551 | 1.802  | 216.26 |
| LOC440558 | 1.284  | 0      |
| LOC440563 | 0.753  | 0.39   |
| LOC440568 | 7.699  | 0      |
| LOC440570 | 2.52   | 0.04   |
| LOC440575 | 1.166  | 0.17   |
| LOC440577 | 1.06   | 4.2    |
| LOC440587 | 1.142  | 0.86   |
| LOC440589 | 0.899  | 1.76   |
| LOC440595 | 1.694  | 6.72   |

|           |        |        |
|-----------|--------|--------|
| LOC440597 | 0.527  | 0      |
| LOC440607 | 0.846  | 0      |
| LOC440700 | 1.228  | 0      |
| LOC440706 | 2.007  | 0      |
| LOC440731 | 0.392  | 1.51   |
| LOC440733 | 0.907  | 56.94  |
| LOC440737 | 0.444  | 48.8   |
| LOC440742 | 3.58   | 0      |
| LOC440748 | 4.345  | 0      |
| LOC440776 | 0.92   | 0      |
| LOC440786 | 0.321  | 0      |
| LOC440792 | 16.273 | 0.09   |
| LOC440795 | 3.55   | 0      |
| LOC440799 | 1.982  | 0      |
| LOC440804 | 6.105  | 0      |
| LOC440829 | 2.236  | 3.94   |
| LOC440836 | 1.722  | 0.17   |
| LOC440839 | 1.621  | 0      |
| LOC440871 | 0.456  | 0      |
| LOC440872 | 6.692  | 0.03   |
| LOC440888 | 1.338  | 0      |
| LOC440895 | 1.993  | 3.57   |
| LOC440896 | 4.387  | 0.02   |
| LOC440900 | 0.81   | 0      |
| LOC440902 | 4.748  | 0.04   |
| LOC440905 | 3.679  | 0      |
| LOC440917 | 1.77   | 19.34  |
| LOC440925 | 2.117  | 0      |
| LOC440926 | 1.059  | 1.87   |
| LOC440934 | 2.951  | 0      |
| LOC440944 | 3.119  | 1.24   |
| LOC440956 | 0.324  | 0      |
| LOC440973 | 1.573  | 0.63   |
| LOC440981 | 0.782  | 0      |
| LOC440991 | 0.829  | 243.7  |
| LOC440992 | 0.52   | 153.35 |
| LOC440993 | 2.734  | 5.9    |
| LOC440995 | 1.08   | 0.92   |
| LOC441005 | 1.145  | 0.09   |
| LOC441009 | 0.734  | 0      |
| LOC441013 | 0.945  | 1.05   |
| LOC441016 | 0.747  | 0      |
| LOC441018 | 0.888  | 0      |
| LOC441019 | 0.419  | 5.43   |
| LOC441026 | 3.086  | 0.35   |
| LOC441032 | 3.358  | 4.12   |
| LOC441034 | 0.891  | 8.99   |
| LOC441046 | 1.989  | 0.44   |
| LOC441052 | 1.47   | 0      |
| LOC441056 | 2.666  | 0.07   |

|           |        |        |
|-----------|--------|--------|
| LOC441061 | 2.576  | 0      |
| LOC441066 | 9.134  | 0.09   |
| LOC441070 | 1.513  | 0      |
| LOC441073 | 0.536  | 203.78 |
| LOC441081 | 6.769  | 0      |
| LOC441087 | 1.437  | 0      |
| LOC441089 | 1.546  | 1.79   |
| LOC441097 | 0.829  | 0      |
| LOC441098 | 4.424  | 0      |
| LOC441108 | 4.146  | 9.16   |
| LOC441114 | 0.382  | 44.55  |
| LOC441119 | 1.131  | 0      |
| LOC441120 | 1.692  | 0      |
| LOC441124 | 2.763  | 0.21   |
| LOC441131 | 0.677  | 0.14   |
| LOC441132 | 2.631  | 0.11   |
| LOC441133 | 76.736 | 0      |
| LOC441136 | 2.165  | 0.05   |
| LOC441150 | 0.552  | 12.55  |
| LOC441154 | 7.421  | 0.73   |
| LOC441155 | 6.151  | 0.73   |
| LOC441160 | 4.196  | 0      |
| LOC441161 | 0.681  | 0      |
| LOC441166 | 0.909  | 1.63   |
| LOC441177 | 2.064  | 0      |
| LOC441178 | 0.396  | 0      |
| LOC441179 | 2.718  | 0.11   |
| LOC441193 | 3.81   | 1.09   |
| LOC441208 | 3.648  | 0.79   |
| LOC441212 | 6.696  | 0.38   |
| LOC441218 | 1.52   | 0      |
| LOC441220 | 7.263  | 3.76   |
| LOC441228 | 15.524 | 0.16   |
| LOC441233 | 5.078  | 0.12   |
| LOC441238 | 2.626  | 1.66   |
| LOC441239 | 2.534  | 0.47   |
| LOC441241 | 0.396  | 1      |
| LOC441242 | 3.923  | 0.23   |
| LOC441251 | 2.132  | 0      |
| LOC441253 | 0.528  | 0      |
| LOC441257 | 4.048  | 0.1    |
| LOC441258 | 2.271  | 0      |
| LOC441259 | 1.982  | 0      |
| LOC441261 | 1.794  | 0.66   |
| LOC441268 | 4.702  | 0.16   |
| LOC441282 | 1.902  | 0      |
| LOC441294 | 4.71   | 0      |
| LOC441296 | 0.1    | 0      |
| LOC441314 | 1.954  | 0      |
| LOC441320 | 0.371  | 0      |

|           |         |       |
|-----------|---------|-------|
| LOC441323 | 1.954   | 0     |
| LOC441326 | 1.954   | 0     |
| LOC441344 | 0.408   | 20.13 |
| LOC441376 | 0.75    | 0     |
| LOC441377 | 0.452   | 0.22  |
| LOC441390 | 2.32    | 0     |
| LOC441410 | 1.372   | 0     |
| LOC441416 | 59.312  | 0     |
| LOC441420 | 8.374   | 0.02  |
| LOC441426 | 3.205   | 0     |
| LOC441440 | 130.003 | 0     |
| LOC441442 | 10.501  | 0.02  |
| LOC441448 | 0.675   | 0     |
| LOC441454 | 0.705   | 7.16  |
| LOC441455 | 3.761   | 0.48  |
| LOC441461 | 0.806   | 0.86  |
| LOC441476 | 1.198   | 0.83  |
| LOC441481 | 0.606   | 17.31 |
| LOC441484 | 1.99    | 0.15  |
| LOC441487 | 4.576   | 0.02  |
| LOC441489 | 0.715   | 0     |
| LOC441490 | 0.738   | 0     |
| LOC441493 | 2.386   | 0     |
| LOC441495 | 1.62    | 0     |
| LOC441505 | 1.632   | 1.4   |
| LOC441506 | 1.226   | 0.24  |
| LOC441511 | 0.6     | 2.64  |
| LOC441522 | 2.222   | 0.36  |
| LOC441528 | 1.203   | 0     |
| LOC441533 | 0.438   | 3.84  |
| LOC441546 | 0.588   | 0.84  |
| LOC441548 | 0.848   | 0.35  |
| LOC441550 | 3.444   | 1.09  |
| LOC441551 | 3.468   | 0     |
| LOC441553 | 18.995  | 0     |
| LOC441554 | 4.201   | 0.09  |
| LOC441568 | 0.384   | 0     |
| LOC441572 | 1.003   | 0.98  |
| LOC441581 | 2.078   | 0.19  |
| LOC441584 | 0.585   | 0     |
| LOC441592 | 0.961   | 0     |
| LOC441601 | 19.63   | 0.05  |
| LOC441609 | 3.228   | 0     |
| LOC441616 | 6.653   | 0     |
| LOC441617 | 1.737   | 0     |
| LOC441623 | 87.355  | 0     |
| LOC441630 | 0.378   | 0     |
| LOC441632 | 2.723   | 13.23 |
| LOC441641 | 0.586   | 0.34  |
| LOC441642 | 0.8     | 0.25  |

|           |         |        |
|-----------|---------|--------|
| LOC441643 | 0.365   | 0      |
| LOC441644 | 107.946 | 0.01   |
| LOC441654 | 21.299  | 0.02   |
| LOC441655 | 0.834   | 0      |
| LOC441662 | 0.744   | 0      |
| LOC441666 | 25.28   | 0      |
| LOC441687 | 51.352  | 0.05   |
| LOC441698 | 1.883   | 0      |
| LOC441711 | 4.128   | 0.46   |
| LOC441720 | 15.173  | 0.62   |
| LOC441722 | 1.228   | 12.89  |
| LOC441726 | 0.413   | 16.77  |
| LOC441728 | 13.601  | 0.01   |
| LOC441730 | 45.129  | 0      |
| LOC441732 | 301.008 | 0      |
| LOC441736 | 27.047  | 0.09   |
| LOC441737 | 2.343   | 0      |
| LOC441742 | 0.624   | 0      |
| LOC441744 | 8.652   | 7.65   |
| LOC441750 | 1.668   | 0.18   |
| LOC441768 | 1.176   | 0      |
| LOC441774 | 2.043   | 10.99  |
| LOC441775 | 0.569   | 50.6   |
| LOC441781 | 0.458   | 0      |
| LOC441783 | 3.537   | 0.05   |
| LOC441784 | 9.317   | 0      |
| LOC441792 | 0.177   | 0      |
| LOC441795 | 0.624   | 0      |
| LOC441800 | 22.591  | 0.02   |
| LOC441806 | 9.06    | 0.25   |
| LOC441811 | 56.732  | 0      |
| LOC441818 | 2.929   | 1.15   |
| LOC441843 | 45.73   | 0.01   |
| LOC441849 | 0.354   | 0      |
| LOC441861 | 3.127   | 0      |
| LOC441862 | 1.043   | 0.47   |
| LOC441864 | 0.348   | 0      |
| LOC441870 | 3.824   | 0      |
| LOC441873 | 1.751   | 0      |
| LOC441876 | 0.918   | 163.38 |
| LOC441878 | 0.768   | 0.12   |
| LOC441880 | 1.466   | 2.77   |
| LOC441884 | 48.327  | 0.01   |
| LOC441887 | 8.365   | 0.32   |
| LOC441891 | 0.942   | 2.73   |
| LOC441893 | 0.988   | 5.41   |
| LOC441896 | 9.966   | 0.03   |
| LOC441897 | 10.159  | 0      |
| LOC441899 | 0.51    | 1.16   |
| LOC441900 | 8.761   | 0.05   |



|           |         |       |
|-----------|---------|-------|
| LOC441904 | 1.237   | 0.8   |
| LOC441907 | 0.42    | 1.88  |
| LOC441914 | 0.548   | 0.54  |
| LOC441915 | 3.416   | 0.49  |
| LOC441925 | 1.296   | 0     |
| LOC441931 | 0.627   | 0     |
| LOC441938 | 73.341  | 0     |
| LOC441940 | 2.189   | 0     |
| LOC441956 | 1.839   | 0     |
| LOC441957 | 7.762   | 0.01  |
| LOC441958 | 1.23    | 0     |
| LOC441964 | 1.254   | 0.39  |
| LOC441969 | 0.318   | 0     |
| LOC441996 | 0.483   | 0     |
| LOC442006 | 0.853   | 0     |
| LOC442013 | 5.463   | 0.12  |
| LOC442017 | 0.444   | 6.69  |
| LOC442019 | 36.18   | 0.01  |
| LOC442021 | 7.007   | 0.05  |
| LOC442028 | 0.565   | 0     |
| LOC442035 | 12.015  | 0.01  |
| LOC442041 | 3.868   | 0.05  |
| LOC442042 | 0.423   | 0.23  |
| LOC442058 | 0.364   | 1.9   |
| LOC442060 | 0.734   | 4.58  |
| LOC442063 | 0.716   | 0     |
| LOC442064 | 1.231   | 1.37  |
| LOC442077 | 0.216   | 0     |
| LOC442078 | 24.655  | 0     |
| LOC442086 | 0.625   | 37.83 |
| LOC442087 | 1.29    | 2.68  |
| LOC442097 | 4.36    | 0.02  |
| LOC442098 | 1.004   | 0.49  |
| LOC442108 | 0.35    | 7.35  |
| LOC442112 | 1.912   | 6.57  |
| LOC442113 | 1.569   | 0.69  |
| LOC442114 | 0.834   | 0     |
| LOC442124 | 0.708   | 0.14  |
| LOC442128 | 0.732   | 0     |
| LOC442131 | 1.037   | 0.48  |
| LOC442132 | 2.048   | 0.05  |
| LOC442142 | 1.166   | 0     |
| LOC442147 | 0.39    | 0     |
| LOC442150 | 1.11    | 0     |
| LOC442153 | 18.116  | 0.03  |
| LOC442155 | 1.188   | 0     |
| LOC442156 | 124.838 | 0.03  |
| LOC442157 | 7.847   | 1.3   |
| LOC442160 | 0.306   | 0     |
| LOC442161 | 1.805   | 0     |

|           |        |        |
|-----------|--------|--------|
| LOC442162 | 0.841  | 0.47   |
| LOC442164 | 2.007  | 0.15   |
| LOC442167 | 1.237  | 3.44   |
| LOC442171 | 0.669  | 0.15   |
| LOC442172 | 9.533  | 0.02   |
| LOC442175 | 0.246  | 5.63   |
| LOC442181 | 8.284  | 0.04   |
| LOC442192 | 2.872  | 0.55   |
| LOC442195 | 1.218  | 0      |
| LOC442204 | 0.57   | 0      |
| LOC442205 | 1.305  | 0      |
| LOC442210 | 8.717  | 0      |
| LOC442211 | 0.984  | 4.22   |
| LOC442215 | 3.661  | 0.62   |
| LOC442217 | 0.973  | 3.25   |
| LOC442221 | 2.84   | 0.25   |
| LOC442227 | 0.375  | 0.27   |
| LOC442229 | 0.21   | 0      |
| LOC442231 | 1.06   | 0.1    |
| LOC442232 | 0.591  | 1.34   |
| LOC442233 | 1.221  | 0.81   |
| LOC442234 | 0.996  | 0      |
| LOC442236 | 88.967 | 0      |
| LOC442237 | 67.357 | 0      |
| LOC442238 | 5.976  | 0      |
| LOC442239 | 0.6    | 0.33   |
| LOC442240 | 1.365  | 2.4    |
| LOC442241 | 3.803  | 0      |
| LOC442242 | 0.74   | 0      |
| LOC442244 | 0.546  | 1.63   |
| LOC442245 | 0.654  | 3.78   |
| LOC442249 | 1.48   | 0      |
| LOC442252 | 1.283  | 0      |
| LOC442253 | 17.391 | 0      |
| LOC442255 | 1.239  | 0.88   |
| LOC442256 | 19.742 | 0.01   |
| LOC442257 | 0.812  | 0      |
| LOC442258 | 0.772  | 19.99  |
| LOC442260 | 0.471  | 0.42   |
| LOC442261 | 0.21   | 0      |
| LOC442262 | 1.007  | 0.39   |
| LOC442263 | 14.098 | 0.13   |
| LOC442266 | 1.522  | 0      |
| LOC442267 | 1.611  | 1.11   |
| LOC442270 | 0.5    | 143.46 |
| LOC442271 | 3.461  | 0      |
| LOC442272 | 6.296  | 0.2    |
| LOC442283 | 12.487 | 1.58   |
| LOC442287 | 0.147  | 0      |
| LOC442288 | 6.057  | 0      |

|           |         |      |
|-----------|---------|------|
| LOC442290 | 1.51    | 0.13 |
| LOC442291 | 3.196   | 0    |
| LOC442292 | 1.082   | 0.09 |
| LOC442295 | 0.83    | 0    |
| LOC442299 | 1.702   | 0    |
| LOC442300 | 5.938   | 0.57 |
| LOC442304 | 2.877   | 0    |
| LOC442308 | 2.664   | 1.15 |
| LOC442309 | 0.881   | 4.49 |
| LOC442316 | 10.92   | 0    |
| LOC442317 | 5.009   | 0    |
| LOC442318 | 2.848   | 0    |
| LOC442319 | 44.74   | 0.02 |
| LOC442320 | 1.385   | 0    |
| LOC442325 | 7.846   | 0.12 |
| LOC442326 | 0.726   | 4.09 |
| LOC442332 | 1.409   | 0    |
| LOC442335 | 0.758   | 0    |
| LOC442336 | 0.494   | 0    |
| LOC442347 | 0.332   | 0    |
| LOC442366 | 0.597   | 0.83 |
| LOC442367 | 28.043  | 0    |
| LOC442381 | 0.222   | 0    |
| LOC442388 | 0.972   | 0    |
| LOC442389 | 0.398   | 0.25 |
| LOC442395 | 47.955  | 0.52 |
| LOC442396 | 0.583   | 1.19 |
| LOC442405 | 1.275   | 0    |
| LOC442406 | 1.284   | 0    |
| LOC442415 | 139.099 | 0    |
| LOC442416 | 69.429  | 0.01 |
| LOC442421 | 0.372   | 0    |
| LOC442423 | 0.525   | 0    |
| LOC442426 | 0.908   | 0    |
| LOC442427 | 0.528   | 0    |
| LOC442429 | 9.855   | 2.74 |
| LOC442431 | 0.265   | 0    |
| LOC442434 | 24.934  | 0    |
| LOC442442 | 0.1     | 0    |
| LOC442443 | 73.667  | 0    |
| LOC442445 | 0.833   | 0    |
| LOC442446 | 22.768  | 0    |
| LOC442447 | 0.759   | 1.82 |
| LOC442448 | 0.912   | 0.76 |
| LOC442455 | 45.746  | 0.01 |
| LOC442459 | 38.867  | 0.02 |
| LOC442460 | 0.495   | 0    |
| LOC442461 | 0.669   | 0.29 |
| LOC442465 | 34.84   | 0    |
| LOC442479 | 3.322   | 0.03 |

|           |        |       |
|-----------|--------|-------|
| LOC442486 | 5.165  | 0     |
| LOC442500 | 7.326  | 0.57  |
| LOC442501 | 0.915  | 0.32  |
| LOC442511 | 44.277 | 0     |
| LOC442517 | 34.622 | 0.07  |
| LOC442523 | 16.438 | 0     |
| LOC442525 | 53.555 | 0.08  |
| LOC442546 | 10.483 | 0     |
| LOC442572 | 2.028  | 0.05  |
| LOC442573 | 17.718 | 0.11  |
| LOC442578 | 2.032  | 1.66  |
| LOC442582 | 2.702  | 0.07  |
| LOC442590 | 2.034  | 0.24  |
| LOC442609 | 5.328  | 0.04  |
| LOC442659 | 0.147  | 0.68  |
| LOC442660 | 6.057  | 0.02  |
| LOC442661 | 26.49  | 0.01  |
| LOC442663 | 3.196  | 0     |
| LOC442664 | 1.082  | 0     |
| LOC442666 | 0.783  | 0     |
| LOC442668 | 0.83   | 7.04  |
| LOC442673 | 5.937  | 0.13  |
| LOC442676 | 6.601  | 0     |
| LOC442677 | 2.878  | 0     |
| LOC442707 | 3.988  | 0     |
| LOC442709 | 1.409  | 4.49  |
| LOC442710 | 0.456  | 0.21  |
| LOC442712 | 0.758  | 0.65  |
| LOC442713 | 0.494  | 0.2   |
| LOC442720 | 1.974  | 2.4   |
| LOC442721 | 3.252  | 0     |
| LOC442723 | 1.009  | 100.6 |
| LOC442726 | 0.808  | 0     |
| LOC442727 | 0.332  | 0.9   |
| LOC442730 | 4.864  | 0     |
| LOC442744 | 9.287  | 0.01  |
| LOC442747 | 41.03  | 0.01  |
| LOC442777 | 0.568  | 23.17 |
| LOC442863 | 14.742 | 0     |
| LOC442864 | 15.688 | 0     |
| LOC442865 | 13.342 | 0     |
| LOC442866 | 13.342 | 0     |
| LOC449518 | 0.225  | 0     |
| LOC4687   | 3.328  | 2.32  |
| LOC492303 | 1.702  | 0.41  |
| LOC492311 | 2.871  | 0.04  |
| LOC493754 | 56.498 | 0.51  |
| LOC493869 | 1.37   | 0     |
| LOC494127 | 1.34   | 0.81  |
| LOC494141 | 2.079  | 0     |

|           |        |       |
|-----------|--------|-------|
| LOC494150 | 1.276  | 0.16  |
| LOC497190 | 1.865  | 0.11  |
| LOC497661 | 1.085  | 7.75  |
| LOC503540 | 1.732  | 1.66  |
| LOC51035  | 1.289  | 96.4  |
| LOC51057  | 3.508  | 1.27  |
| LOC51136  | 1.893  | 2.14  |
| LOC51149  | 2.066  | 0.82  |
| LOC51233  | 1.625  | 7.06  |
| LOC51252  | 0.962  | 0     |
| LOC51255  | 0.716  | 26.25 |
| LOC54103  | 4.552  | 3.76  |
| LOC541469 | 1.461  | 0     |
| LOC541473 | 1.96   | 1.36  |
| LOC544314 | 2.043  | 5.61  |
| LOC548599 | 0.635  | 0.93  |
| LOC550112 | 0.428  | 2.54  |
| LOC550631 | 2.64   | 0.19  |
| LOC550644 | 1.084  | 4.11  |
| LOC552891 | 1.448  | 1.71  |
| LOC553139 | 2.395  | 0     |
| LOC553148 | 6.924  | 0.07  |
| LOC553158 | 1.752  | 0.12  |
| LOC553820 | 10.389 | 0.01  |
| LOC553939 | 2.586  | 0.19  |
| LOC554049 | 1.134  | 1.66  |
| LOC554175 | 2.251  | 0.09  |
| LOC554203 | 1.241  | 0.64  |
| LOC554224 | 20.512 | 0.24  |
| LOC554225 | 19.084 | 0.08  |
| LOC554226 | 1.904  | 0     |
| LOC554234 | 0.502  | 0.2   |
| LOC554235 | 0.844  | 1.52  |
| LOC554251 | 2.719  | 0     |
| LOC55565  | 1.822  | 10.91 |
| LOC55908  | 1.223  | 0.08  |
| LOC56964  | 2.409  | 0     |
| LOC57228  | 1.239  | 5.59  |
| LOC572558 | 0.609  | 0     |
| LOC573971 | 3.497  | 0.99  |
| LOC574080 | 0.729  | 0     |
| LOC58489  | 4.176  | 8.41  |
| LOC595101 | 72.082 | 0.15  |
| LOC606495 | 0.838  | 0.71  |
| LOC606724 | 0.571  | 11.44 |
| LOC613037 | 26.038 | 0.19  |
| LOC613038 | 4.091  | 1.21  |
| LOC613206 | 1.516  | 0.33  |
| LOC613266 | 2.025  | 0.68  |
| LOC619207 | 19.426 | 0.26  |

|           |        |      |
|-----------|--------|------|
| LOC619208 | 2.671  | 0.29 |
| LOC63920  | 2.807  | 0.25 |
| LOC63928  | 2.366  | 0    |
| LOC641293 | 0.604  | 0.82 |
| LOC641311 | 1.558  | 5.85 |
| LOC641378 | 2.441  | 0.45 |
| LOC641379 | 7.282  | 0.48 |
| LOC641380 | 3.068  | 0    |
| LOC641381 | 0.653  | 0    |
| LOC641382 | 3.364  | 0    |
| LOC641456 | 0.421  | 3.29 |
| LOC641457 | 0.424  | 8.63 |
| LOC641515 | 1.3    | 0    |
| LOC641518 | 1.706  | 3.01 |
| LOC641522 | 1.333  | 0.45 |
| LOC641695 | 1.051  | 0.57 |
| LOC641696 | 0.699  | 0    |
| LOC641705 | 0.626  | 3.64 |
| LOC641708 | 11.31  | 0.17 |
| LOC641717 | 29.056 | 0.01 |
| LOC641719 | 0.576  | 0    |
| LOC641720 | 29.061 | 0.01 |
| LOC641727 | 0.794  | 0    |
| LOC641728 | 0.264  | 0    |
| LOC641730 | 7.769  | 0    |
| LOC641734 | 3.095  | 0.04 |
| LOC641745 | 1.125  | 0    |
| LOC641746 | 0.267  | 0    |
| LOC641748 | 0.6    | 0    |
| LOC641752 | 1.96   | 0.76 |
| LOC641755 | 3.722  | 0    |
| LOC641761 | 69.252 | 0.13 |
| LOC641763 | 0.354  | 1.68 |
| LOC641765 | 2.13   | 0.33 |
| LOC641766 | 0.585  | 0    |
| LOC641767 | 0.618  | 0    |
| LOC641768 | 0.437  | 0    |
| LOC641776 | 1.596  | 0.06 |
| LOC641777 | 0.88   | 0    |
| LOC641784 | 0.377  | 0    |
| LOC641787 | 0.794  | 1    |
| LOC641789 | 3.153  | 0    |
| LOC641790 | 0.375  | 0    |
| LOC641796 | 0.432  | 0    |
| LOC641798 | 2.23   | 0    |
| LOC641803 | 3.554  | 0    |
| LOC641808 | 2.16   | 0.18 |
| LOC641814 | 0.922  | 0    |
| LOC641826 | 0.924  | 0    |
| LOC641827 | 0.789  | 0    |

|           |        |      |
|-----------|--------|------|
| LOC641830 | 0.207  | 0    |
| LOC641832 | 0.561  | 0    |
| LOC641835 | 0.573  | 0    |
| LOC641840 | 0.418  | 0    |
| LOC641842 | 73.468 | 0.07 |
| LOC641844 | 1.267  | 0.16 |
| LOC641845 | 1.548  | 0.7  |
| LOC641849 | 0.793  | 0    |
| LOC641850 | 0.808  | 0    |
| LOC641853 | 1.322  | 0    |
| LOC641856 | 0.495  | 0    |
| LOC641857 | 0.342  | 0    |
| LOC641858 | 0.666  | 0.15 |
| LOC641859 | 1.131  | 0    |
| LOC641863 | 0.348  | 0    |
| LOC641894 | 0.807  | 0    |
| LOC641895 | 0.24   | 0    |
| LOC641900 | 1.698  | 0    |
| LOC641901 | 1.035  | 0    |
| LOC641902 | 0.393  | 0    |
| LOC641903 | 0.198  | 0    |
| LOC641905 | 0.693  | 0.28 |
| LOC641909 | 5.663  | 0.04 |
| LOC641911 | 0.456  | 2.82 |
| LOC641912 | 1.781  | 0.12 |
| LOC641916 | 3.972  | 0.35 |
| LOC641920 | 0.776  | 0    |
| LOC641922 | 1.5    | 0.06 |
| LOC641924 | 18.062 | 0    |
| LOC641930 | 2.192  | 0    |
| LOC641931 | 0.927  | 0    |
| LOC641933 | 4.016  | 0.03 |
| LOC641936 | 0.303  | 0    |
| LOC641940 | 1.77   | 0.05 |
| LOC641942 | 0.984  | 0    |
| LOC641945 | 6.681  | 0    |
| LOC641948 | 2.052  | 0    |
| LOC641955 | 0.621  | 0    |
| LOC641959 | 0.837  | 0    |
| LOC641961 | 1.887  | 0    |
| LOC641963 | 0.502  | 0    |
| LOC641971 | 0.408  | 0    |
| LOC641977 | 2.271  | 1.4  |
| LOC641980 | 1.65   | 0    |
| LOC641983 | 8.043  | 0    |
| LOC641987 | 0.483  | 0    |
| LOC641990 | 4.55   | 0    |
| LOC641992 | 0.569  | 0    |
| LOC641994 | 0.954  | 0    |
| LOC642002 | 7.485  | 0    |

|           |        |       |
|-----------|--------|-------|
| LOC642004 | 4.382  | 1.49  |
| LOC642005 | 0.387  | 0     |
| LOC642006 | 37.249 | 0.02  |
| LOC642007 | 21.831 | 0     |
| LOC642009 | 0.788  | 0     |
| LOC642014 | 0.675  | 0     |
| LOC642018 | 0.216  | 0     |
| LOC642019 | 0.69   | 0     |
| LOC642024 | 0.879  | 0     |
| LOC642026 | 0.576  | 0     |
| LOC642030 | 0.839  | 0     |
| LOC642031 | 3.13   | 0.47  |
| LOC642038 | 0.168  | 0     |
| LOC642043 | 14.393 | 0.81  |
| LOC642044 | 0.994  | 0     |
| LOC642045 | 0.636  | 0     |
| LOC642051 | 0.687  | 0     |
| LOC642056 | 0.576  | 0     |
| LOC642059 | 0.839  | 0     |
| LOC642072 | 40.331 | 2.11  |
| LOC642073 | 15.978 | 0.43  |
| LOC642074 | 15.574 | 0.76  |
| LOC642075 | 0.994  | 0     |
| LOC642076 | 0.636  | 0     |
| LOC642096 | 23.878 | 0.37  |
| LOC642131 | 0.618  | 0.32  |
| LOC642198 | 2.635  | 0.27  |
| LOC642255 | 2.785  | 0     |
| LOC642259 | 1.045  | 12.59 |
| LOC642262 | 1.14   | 0.43  |
| LOC642263 | 12.151 | 0     |
| LOC642276 | 1.257  | 0     |
| LOC642277 | 0.246  | 1.21  |
| LOC642278 | 0.603  | 0.16  |
| LOC642284 | 5.625  | 0     |
| LOC642288 | 22.298 | 0     |
| LOC642290 | 23.173 | 0.01  |
| LOC642295 | 0.267  | 0     |
| LOC642296 | 2.591  | 0     |
| LOC642300 | 61.019 | 0.01  |
| LOC642305 | 1.048  | 3.87  |
| LOC642306 | 12.481 | 0.15  |
| LOC642307 | 0.938  | 0     |
| LOC642311 | 1.611  | 0     |
| LOC642313 | 1.637  | 0     |
| LOC642317 | 18.138 | 0.21  |
| LOC642319 | 29.036 | 0     |
| LOC642325 | 8.893  | 0     |
| LOC642329 | 11.625 | 0     |
| LOC642335 | 2.434  | 0.44  |



|           |        |       |
|-----------|--------|-------|
| LOC642337 | 0.525  | 0     |
| LOC642340 | 1.023  | 1.16  |
| LOC642341 | 0.438  | 0     |
| LOC642343 | 0.495  | 0     |
| LOC642346 | 12.729 | 0     |
| LOC642350 | 1.093  | 0     |
| LOC642355 | 0.342  | 0.29  |
| LOC642357 | 1.31   | 15.18 |
| LOC642361 | 2.64   | 1.42  |
| LOC642362 | 0.69   | 0     |
| LOC642366 | 2.33   | 0     |
| LOC642367 | 2.19   | 0.91  |
| LOC642373 | 45.779 | 0     |
| LOC642381 | 0.279  | 0     |
| LOC642383 | 0.879  | 0     |
| LOC642384 | 2.291  | 0.6   |
| LOC642385 | 2.405  | 0     |
| LOC642389 | 2.601  | 0     |
| LOC642395 | 64.887 | 0.48  |
| LOC642397 | 90.284 | 0.48  |
| LOC642398 | 6.697  | 0     |
| LOC642399 | 0.542  | 0     |
| LOC642401 | 1.121  | 0     |
| LOC642402 | 6.927  | 0     |
| LOC642406 | 146.29 | 0     |
| LOC642413 | 5.047  | 0     |
| LOC642414 | 8.311  | 0     |
| LOC642421 | 1.131  | 0     |
| LOC642423 | 34.357 | 0.01  |
| LOC642424 | 0.609  | 0     |
| LOC642425 | 7.382  | 0     |
| LOC642426 | 1.493  | 0     |
| LOC642433 | 0.578  | 0     |
| LOC642440 | 0.162  | 0.61  |
| LOC642441 | 8.151  | 0.04  |
| LOC642443 | 2.331  | 1.99  |
| LOC642446 | 1.71   | 0     |
| LOC642448 | 32.046 | 0     |
| LOC642450 | 0.879  | 0     |
| LOC642451 | 1.805  | 0     |
| LOC642452 | 0.588  | 0.17  |
| LOC642458 | 2.171  | 0     |
| LOC642460 | 50.352 | 0     |
| LOC642461 | 0.264  | 0     |
| LOC642469 | 15.702 | 0     |
| LOC642471 | 0.414  | 0     |
| LOC642474 | 8.191  | 0     |
| LOC642483 | 0.498  | 0     |
| LOC642486 | 0.735  | 0.13  |
| LOC642487 | 9.009  | 0     |

|           |        |       |
|-----------|--------|-------|
| LOC642490 | 0.506  | 0     |
| LOC642493 | 1.305  | 0.08  |
| LOC642496 | 13.177 | 0     |
| LOC642505 | 0.246  | 11.26 |
| LOC642511 | 27.485 | 0.03  |
| LOC642513 | 2.785  | 0.11  |
| LOC642515 | 0.867  | 0     |
| LOC642521 | 0.513  | 0     |
| LOC642522 | 12.833 | 0     |
| LOC642533 | 12.636 | 0.46  |
| LOC642536 | 0.336  | 0.29  |
| LOC642538 | 0.522  | 0     |
| LOC642539 | 47.219 | 0     |
| LOC642544 | 0.472  | 0     |
| LOC642545 | 15.172 | 0     |
| LOC642546 | 2.737  | 0.43  |
| LOC642550 | 0.737  | 0.13  |
| LOC642554 | 3.737  | 0     |
| LOC642555 | 1.332  | 0     |
| LOC642559 | 1.378  | 0.36  |
| LOC642563 | 0.588  | 0     |
| LOC642567 | 1.593  | 0     |
| LOC642569 | 7.376  | 0     |
| LOC642574 | 1.758  | 0     |
| LOC642578 | 0.234  | 0     |
| LOC642579 | 8.369  | 0     |
| LOC642580 | 0.404  | 0     |
| LOC642585 | 1.78   | 2.5   |
| LOC642587 | 1.37   | 0     |
| LOC642588 | 3.515  | 0     |
| LOC642590 | 1.67   | 1.19  |
| LOC642592 | 4.043  | 0.22  |
| LOC642597 | 0.984  | 0     |
| LOC642599 | 3.199  | 0     |
| LOC642609 | 4.29   | 0     |
| LOC642612 | 0.69   | 0     |
| LOC642614 | 1.218  | 0     |
| LOC642617 | 2.124  | 0     |
| LOC642622 | 1.059  | 0     |
| LOC642623 | 1.182  | 0     |
| LOC642627 | 0.348  | 0.57  |
| LOC642629 | 3.99   | 0     |
| LOC642631 | 10.475 | 0     |
| LOC642633 | 1.664  | 0     |
| LOC642635 | 24.523 | 0     |
| LOC642636 | 1.389  | 0     |
| LOC642637 | 0.603  | 0     |
| LOC642648 | 1.018  | 3.5   |
| LOC642652 | 5.728  | 0     |
| LOC642656 | 0.894  | 0     |

|           |        |        |
|-----------|--------|--------|
| LOC642658 | 0.606  | 0.16   |
| LOC642659 | 1.361  | 29.22  |
| LOC642661 | 2.413  | 0.04   |
| LOC642662 | 1.608  | 0      |
| LOC642663 | 0.483  | 0      |
| LOC642666 | 0.411  | 0      |
| LOC642669 | 0.677  | 0      |
| LOC642672 | 0.318  | 0      |
| LOC642677 | 0.639  | 0      |
| LOC642678 | 0.798  | 0      |
| LOC642681 | 0.563  | 0      |
| LOC642683 | 6.348  | 0      |
| LOC642692 | 0.21   | 0      |
| LOC642694 | 0.489  | 0      |
| LOC642697 | 19.114 | 0.01   |
| LOC642702 | 0.374  | 0      |
| LOC642704 | 0.444  | 0      |
| LOC642707 | 2.322  | 0      |
| LOC642721 | 1.556  | 0      |
| LOC642727 | 0.222  | 2.67   |
| LOC642728 | 3.435  | 0      |
| LOC642731 | 0.921  | 0      |
| LOC642732 | 4.118  | 0.68   |
| LOC642734 | 0.855  | 1.97   |
| LOC642737 | 1.825  | 0.05   |
| LOC642738 | 0.578  | 1.2    |
| LOC642740 | 0.559  | 0.53   |
| LOC642741 | 1.31   | 102.86 |
| LOC642755 | 1.578  | 0.06   |
| LOC642758 | 0.357  | 0      |
| LOC642759 | 0.696  | 0      |
| LOC642765 | 0.465  | 0.21   |
| LOC642773 | 0.939  | 0      |
| LOC642778 | 23.629 | 0.04   |
| LOC642781 | 1.58   | 0.62   |
| LOC642784 | 1.368  | 14.9   |
| LOC642788 | 10.595 | 0.01   |
| LOC642791 | 38.639 | 0      |
| LOC642796 | 0.509  | 0      |
| LOC642799 | 23.627 | 0.03   |
| LOC642802 | 0.771  | 0.39   |
| LOC642812 | 1.549  | 3      |
| LOC642817 | 1.348  | 0.44   |
| LOC642818 | 1.135  | 0      |
| LOC642826 | 2.136  | 0      |
| LOC642828 | 0.928  | 3.52   |
| LOC642837 | 1.269  | 0      |
| LOC642838 | 2.187  | 0      |
| LOC642840 | 7.767  | 0      |
| LOC642843 | 0.666  | 0.15   |

|           |        |       |
|-----------|--------|-------|
| LOC642846 | 4.413  | 1.93  |
| LOC642850 | 54.589 | 0     |
| LOC642851 | 14.528 | 0     |
| LOC642852 | 0.407  | 1.95  |
| LOC642861 | 0.213  | 0     |
| LOC642872 | 0.816  | 0.49  |
| LOC642874 | 0.366  | 0     |
| LOC642879 | 30.5   | 0.02  |
| LOC642888 | 3.747  | 0     |
| LOC642890 | 0.504  | 0.59  |
| LOC642891 | 0.937  | 0     |
| LOC642892 | 0.171  | 4.63  |
| LOC642893 | 1.011  | 0     |
| LOC642894 | 9.641  | 0     |
| LOC642897 | 0.964  | 0     |
| LOC642907 | 0.874  | 0     |
| LOC642909 | 12.302 | 0.22  |
| LOC642910 | 2.209  | 1.08  |
| LOC642921 | 2.763  | 0.25  |
| LOC642922 | 0.621  | 0     |
| LOC642927 | 0.861  | 0     |
| LOC642935 | 33.75  | 0.01  |
| LOC642936 | 0.498  | 0     |
| LOC642940 | 14.139 | 0.26  |
| LOC642943 | 9.078  | 0     |
| LOC642947 | 1.751  | 0     |
| LOC642952 | 1.643  | 0     |
| LOC642954 | 2.305  | 4.12  |
| LOC642956 | 0.689  | 0.28  |
| LOC642958 | 4.859  | 0.06  |
| LOC642959 | 28.158 | 0     |
| LOC642975 | 1.471  | 3.7   |
| LOC642979 | 1.653  | 0     |
| LOC642980 | 4.066  | 0.27  |
| LOC642991 | 0.684  | 0     |
| LOC642996 | 21.231 | 0.01  |
| LOC642998 | 0.522  | 2.46  |
| LOC643001 | 0.333  | 0     |
| LOC643008 | 5.585  | 1.24  |
| LOC643014 | 9.486  | 0.08  |
| LOC643015 | 2.147  | 1.2   |
| LOC643017 | 0.153  | 0     |
| LOC643022 | 0.647  | 0     |
| LOC643031 | 0.513  | 95.66 |
| LOC643033 | 0.981  | 0.2   |
| LOC643034 | 1.269  | 0     |
| LOC643037 | 0.694  | 0     |
| LOC643042 | 0.438  | 0     |
| LOC643043 | 0.321  | 0.93  |
| LOC643050 | 1.338  | 0     |

|           |        |       |
|-----------|--------|-------|
| LOC643052 | 1.059  | 0     |
| LOC643058 | 0.65   | 0.61  |
| LOC643063 | 0.482  | 0     |
| LOC643064 | 36.985 | 0     |
| LOC643067 | 1.184  | 0     |
| LOC643069 | 1.658  | 0     |
| LOC643072 | 1.75   | 1.3   |
| LOC643073 | 0.603  | 0     |
| LOC643079 | 3.029  | 1.44  |
| LOC643081 | 0.318  | 0     |
| LOC643085 | 1.767  | 0     |
| LOC643086 | 0.552  | 0     |
| LOC643095 | 9.344  | 0.01  |
| LOC643100 | 0.618  | 0     |
| LOC643101 | 0.24   | 1.24  |
| LOC643102 | 3.655  | 0.92  |
| LOC643106 | 0.894  | 0.22  |
| LOC643109 | 0.831  | 1.07  |
| LOC643114 | 45.348 | 0.01  |
| LOC643118 | 8.581  | 0     |
| LOC643123 | 19.789 | 0     |
| LOC643126 | 7.22   | 0     |
| LOC643133 | 1.02   | 0     |
| LOC643134 | 0.288  | 0     |
| LOC643136 | 5.195  | 1.45  |
| LOC643143 | 0.398  | 0.25  |
| LOC643151 | 4.12   | 0     |
| LOC643153 | 2.437  | 0.04  |
| LOC643157 | 16.976 | 0     |
| LOC643159 | 1.44   | 9.83  |
| LOC643160 | 11.961 | 0     |
| LOC643161 | 0.362  | 0     |
| LOC643166 | 52.478 | 0     |
| LOC643167 | 2.454  | 34.39 |
| LOC643168 | 4.486  | 0.53  |
| LOC643171 | 19.401 | 0     |
| LOC643172 | 2.267  | 0     |
| LOC643177 | 13.251 | 0.02  |
| LOC643179 | 0.195  | 0     |
| LOC643181 | 37.189 | 0     |
| LOC643182 | 7.231  | 0.03  |
| LOC643187 | 32.839 | 0     |
| LOC643189 | 0.57   | 0     |
| LOC643193 | 0.459  | 11.21 |
| LOC643194 | 0.749  | 0.27  |
| LOC643198 | 1.263  | 0.08  |
| LOC643199 | 53.31  | 0.01  |
| LOC643201 | 0.748  | 0     |
| LOC643205 | 0.315  | 0     |
| LOC643219 | 27.473 | 0.75  |

|           |         |        |
|-----------|---------|--------|
| LOC643220 | 1.256   | 0.48   |
| LOC643224 | 1.494   | 0      |
| LOC643226 | 0.747   | 0.13   |
| LOC643227 | 0.15    | 0      |
| LOC643228 | 46.62   | 0      |
| LOC643232 | 1.271   | 0.39   |
| LOC643233 | 0.54    | 0      |
| LOC643244 | 1.745   | 0.46   |
| LOC643255 | 0.682   | 0.73   |
| LOC643260 | 0.525   | 55.97  |
| LOC643263 | 0.586   | 0      |
| LOC643264 | 0.859   | 0      |
| LOC643271 | 0.324   | 0      |
| LOC643275 | 1.187   | 0      |
| LOC643276 | 2.757   | 1.33   |
| LOC643278 | 0.681   | 0      |
| LOC643280 | 9.569   | 0.49   |
| LOC643281 | 0.636   | 0      |
| LOC643287 | 1.371   | 1.3    |
| LOC643300 | 2.263   | 1.05   |
| LOC643305 | 0.681   | 1.16   |
| LOC643307 | 51.346  | 0      |
| LOC643308 | 1.698   | 0.4    |
| LOC643309 | 1.118   | 0.09   |
| LOC643310 | 0.246   | 0      |
| LOC643319 | 1.353   | 20.48  |
| LOC643321 | 54.805  | 0.01   |
| LOC643324 | 0.381   | 0      |
| LOC643327 | 0.578   | 5.14   |
| LOC643329 | 50.382  | 0.08   |
| LOC643330 | 0.429   | 0      |
| LOC643332 | 0.481   | 0      |
| LOC643334 | 0.402   | 0      |
| LOC643336 | 0.569   | 1.05   |
| LOC643338 | 2.492   | 1.35   |
| LOC643339 | 0.572   | 0      |
| LOC643341 | 0.321   | 0      |
| LOC643342 | 2.473   | 0.32   |
| LOC643345 | 0.168   | 0      |
| LOC643348 | 20.367  | 0      |
| LOC643353 | 1.125   | 0      |
| LOC643355 | 1.794   | 0      |
| LOC643358 | 0.83    | 340.67 |
| LOC643362 | 0.954   | 0      |
| LOC643367 | 4.324   | 0      |
| LOC643368 | 0.555   | 0      |
| LOC643370 | 7.031   | 0      |
| LOC643371 | 230.573 | 0      |
| LOC643373 | 0.756   | 1.17   |
| LOC643377 | 0.639   | 0      |

|           |        |        |
|-----------|--------|--------|
| LOC643382 | 1.02   | 0      |
| LOC643384 | 9.678  | 0      |
| LOC643386 | 0.552  | 0.71   |
| LOC643387 | 2.676  | 4.14   |
| LOC643395 | 0.282  | 0      |
| LOC643397 | 1.577  | 0      |
| LOC643412 | 0.961  | 0.52   |
| LOC643416 | 0.372  | 0      |
| LOC643421 | 0.508  | 0.78   |
| LOC643427 | 1.581  | 3.94   |
| LOC643428 | 0.33   | 0      |
| LOC643441 | 2.071  | 0      |
| LOC643445 | 9.528  | 0      |
| LOC643446 | 4.527  | 3.43   |
| LOC643447 | 10.801 | 0      |
| LOC643449 | 0.539  | 0      |
| LOC643454 | 1.288  | 5.45   |
| LOC643459 | 3.02   | 0      |
| LOC643461 | 0.879  | 0      |
| LOC643464 | 0.848  | 0      |
| LOC643470 | 10.513 | 0      |
| LOC643471 | 1.277  | 1.09   |
| LOC643474 | 1.134  | 0      |
| LOC643475 | 4.904  | 0      |
| LOC643479 | 0.322  | 0      |
| LOC643491 | 1.035  | 0      |
| LOC643494 | 1.074  | 0.46   |
| LOC643499 | 0.537  | 43.48  |
| LOC643503 | 1.203  | 0.33   |
| LOC643505 | 0.198  | 4.5    |
| LOC643506 | 1.083  | 0      |
| LOC643507 | 0.74   | 0      |
| LOC643513 | 1.591  | 0.37   |
| LOC643514 | 0.816  | 0      |
| LOC643517 | 0.676  | 0.44   |
| LOC643519 | 2.151  | 0      |
| LOC643524 | 0.666  | 0.15   |
| LOC643531 | 0.603  | 0.66   |
| LOC643533 | 0.423  | 0      |
| LOC643534 | 0.489  | 178.25 |
| LOC643535 | 1.4    | 0.07   |
| LOC643536 | 1.717  | 0.69   |
| LOC643543 | 1.022  | 0      |
| LOC643547 | 0.567  | 0.18   |
| LOC643550 | 0.411  | 1.93   |
| LOC643551 | 0.765  | 0      |
| LOC643554 | 0.135  | 0      |
| LOC643560 | 68.232 | 0.01   |
| LOC643561 | 0.351  | 0      |
| LOC643562 | 19.175 | 0.99   |

|           |        |       |
|-----------|--------|-------|
| LOC643563 | 0.318  | 0.31  |
| LOC643579 | 39.58  | 0     |
| LOC643582 | 0.827  | 0     |
| LOC643586 | 24.498 | 0.47  |
| LOC643587 | 16.096 | 0     |
| LOC643589 | 10.39  | 0     |
| LOC643594 | 2.433  | 0     |
| LOC643596 | 0.9    | 0.44  |
| LOC643599 | 0.506  | 0     |
| LOC643605 | 1.159  | 1.71  |
| LOC643609 | 21.289 | 0     |
| LOC643613 | 20.672 | 0.08  |
| LOC643615 | 1.119  | 0     |
| LOC643617 | 1.04   | 0.76  |
| LOC643618 | 0.899  | 0     |
| LOC643623 | 2.965  | 0     |
| LOC643630 | 2.133  | 0     |
| LOC643631 | 0.255  | 1.55  |
| LOC643634 | 2.452  | 14.73 |
| LOC643637 | 1.568  | 0     |
| LOC643639 | 4.003  | 0.02  |
| LOC643641 | 13.208 | 1.39  |
| LOC643646 | 4.096  | 0.49  |
| LOC643652 | 1.568  | 0     |
| LOC643653 | 0.751  | 0.52  |
| LOC643654 | 0.594  | 0     |
| LOC643665 | 0.954  | 0     |
| LOC643668 | 1.572  | 1.13  |
| LOC643669 | 1.092  | 1.18  |
| LOC643670 | 0.483  | 12.91 |
| LOC643677 | 11.201 | 0     |
| LOC643678 | 0.96   | 0.41  |
| LOC643680 | 0.69   | 0     |
| LOC643684 | 1.456  | 0     |
| LOC643689 | 1.567  | 1.89  |
| LOC643694 | 0.864  | 0     |
| LOC643696 | 7.191  | 0     |
| LOC643699 | 4.018  | 0.08  |
| LOC643703 | 1.029  | 0     |
| LOC643707 | 34.376 | 0.01  |
| LOC643709 | 4.994  | 0.02  |
| LOC643711 | 0.27   | 0.73  |
| LOC643714 | 0.999  | 0     |
| LOC643717 | 0.616  | 0     |
| LOC643718 | 0.367  | 0     |
| LOC643719 | 0.616  | 0.16  |
| LOC643723 | 0.473  | 0     |
| LOC643733 | 6.453  | 1.08  |
| LOC643737 | 1.272  | 3.73  |
| LOC643739 | 8.616  | 0.01  |



|           |        |       |
|-----------|--------|-------|
| LOC643744 | 1.235  | 0     |
| LOC643745 | 1.101  | 0     |
| LOC643746 | 0.919  | 0.11  |
| LOC643749 | 0.609  | 3.08  |
| LOC643750 | 0.501  | 0     |
| LOC643751 | 2.407  | 8.43  |
| LOC643753 | 0.235  | 10.11 |
| LOC643759 | 1.137  | 0     |
| LOC643762 | 88.782 | 0     |
| LOC643766 | 1.319  | 0     |
| LOC643768 | 32.494 | 0     |
| LOC643770 | 1.825  | 0     |
| LOC643778 | 2.829  | 0     |
| LOC643779 | 1.004  | 19.81 |
| LOC643783 | 1.189  | 0.59  |
| LOC643784 | 0.788  | 0     |
| LOC643789 | 13.146 | 0.01  |
| LOC643790 | 1.323  | 2.84  |
| LOC643802 | 12.773 | 0.02  |
| LOC643804 | 0.492  | 0     |
| LOC643806 | 1.842  | 0.05  |
| LOC643810 | 6.157  | 0.03  |
| LOC643825 | 1.254  | 0     |
| LOC643827 | 84.931 | 0     |
| LOC643831 | 0.72   | 0     |
| LOC643836 | 17.14  | 0.4   |
| LOC643845 | 1.263  | 0     |
| LOC643851 | 0.189  | 1.05  |
| LOC643852 | 5.663  | 0     |
| LOC643854 | 3.894  | 0     |
| LOC643855 | 0.186  | 0     |
| LOC643856 | 4.629  | 0.02  |
| LOC643858 | 1.349  | 0.07  |
| LOC643859 | 3.412  | 0     |
| LOC643860 | 69.422 | 0     |
| LOC643862 | 1.596  | 0     |
| LOC643863 | 0.6    | 2.64  |
| LOC643870 | 0.646  | 69.07 |
| LOC643872 | 1.226  | 0     |
| LOC643873 | 1.813  | 19.59 |
| LOC643875 | 0.3    | 4.61  |
| LOC643877 | 14.524 | 0     |
| LOC643878 | 0.222  | 0     |
| LOC643880 | 1.371  | 0     |
| LOC643883 | 0.72   | 1.92  |
| LOC643884 | 0.564  | 0.18  |
| LOC643888 | 5.261  | 0.02  |
| LOC643894 | 1.073  | 0.18  |
| LOC643897 | 1.139  | 21.89 |
| LOC643898 | 0.512  | 0     |

|           |        |        |
|-----------|--------|--------|
| LOC643901 | 0.411  | 2.17   |
| LOC643904 | 0.663  | 0.3    |
| LOC643905 | 1.17   | 0      |
| LOC643906 | 0.741  | 0      |
| LOC643909 | 2.271  | 0      |
| LOC643915 | 0.894  | 0      |
| LOC643916 | 0.339  | 0      |
| LOC643921 | 13.248 | 0.07   |
| LOC643923 | 0.972  | 0.1    |
| LOC643926 | 0.375  | 0      |
| LOC643932 | 1.642  | 0.18   |
| LOC643933 | 0.651  | 0.3    |
| LOC643936 | 0.657  | 3.16   |
| LOC643938 | 0.15   | 0      |
| LOC643949 | 0.379  | 617.64 |
| LOC643950 | 0.723  | 0.41   |
| LOC643951 | 0.576  | 0.35   |
| LOC643954 | 0.625  | 0.16   |
| LOC643955 | 29.056 | 0      |
| LOC643960 | 0.91   | 0.32   |
| LOC643962 | 2.741  | 0      |
| LOC643965 | 0.444  | 0      |
| LOC643971 | 0.772  | 0      |
| LOC643972 | 0.486  | 0      |
| LOC643974 | 8.735  | 0.42   |
| LOC643976 | 1.548  | 1.6    |
| LOC643981 | 2.277  | 1      |
| LOC643983 | 0.597  | 0.83   |
| LOC643986 | 0.474  | 0.42   |
| LOC643987 | 6.576  | 0.09   |
| LOC643988 | 2.083  | 0.24   |
| LOC643989 | 1.563  | 0.06   |
| LOC643992 | 2.349  | 0.12   |
| LOC643996 | 0.895  | 0      |
| LOC643997 | 0.646  | 0.3    |
| LOC644000 | 0.576  | 0.86   |
| LOC644006 | 2.759  | 1.76   |
| LOC644010 | 2.696  | 8.26   |
| LOC644012 | 0.678  | 0      |
| LOC644013 | 0.746  | 0.13   |
| LOC644016 | 1.691  | 0      |
| LOC644017 | 29.061 | 0      |
| LOC644020 | 6.177  | 0.02   |
| LOC644021 | 17.921 | 0      |
| LOC644022 | 0.386  | 0      |
| LOC644023 | 0.204  | 0      |
| LOC644026 | 1.011  | 0.1    |
| LOC644029 | 0.908  | 56.22  |
| LOC644030 | 4.979  | 0      |
| LOC644035 | 1.853  | 42.5   |

|           |        |       |
|-----------|--------|-------|
| LOC644037 | 1.753  | 1.46  |
| LOC644038 | 1.621  | 0     |
| LOC644042 | 0.947  | 0     |
| LOC644045 | 1.816  | 0     |
| LOC644050 | 8.244  | 0     |
| LOC644051 | 1.346  | 0.22  |
| LOC644054 | 0.362  | 0     |
| LOC644055 | 0.987  | 0     |
| LOC644056 | 0.456  | 0     |
| LOC644060 | 1.662  | 4.28  |
| LOC644063 | 2.903  | 39.78 |
| LOC644065 | 0.603  | 0     |
| LOC644066 | 0.822  | 0     |
| LOC644070 | 28.906 | 0.02  |
| LOC644075 | 1.041  | 1.9   |
| LOC644079 | 7.502  | 0.15  |
| LOC644082 | 3.011  | 31.91 |
| LOC644083 | 2.336  | 0.09  |
| LOC644090 | 1.781  | 0     |
| LOC644092 | 0.849  | 0.46  |
| LOC644094 | 77.195 | 0.01  |
| LOC644096 | 1.147  | 5     |
| LOC644098 | 0.387  | 0     |
| LOC644100 | 0.387  | 0     |
| LOC644101 | 0.901  | 4.51  |
| LOC644103 | 0.462  | 0.21  |
| LOC644106 | 2.198  | 0     |
| LOC644109 | 1.179  | 0     |
| LOC644110 | 5.663  | 0     |
| LOC644111 | 0.558  | 0.36  |
| LOC644119 | 0.234  | 5.92  |
| LOC644124 | 7.972  | 0     |
| LOC644129 | 13.733 | 0     |
| LOC644131 | 2.221  | 13.5  |
| LOC644132 | 10.368 | 0     |
| LOC644135 | 0.471  | 0     |
| LOC644138 | 9.531  | 0.27  |
| LOC644140 | 4.457  | 0     |
| LOC644141 | 8.26   | 0.88  |
| LOC644146 | 0.567  | 20.59 |
| LOC644151 | 0.631  | 0.16  |
| LOC644152 | 0.309  | 0     |
| LOC644153 | 2.363  | 0     |
| LOC644154 | 9.175  | 0     |
| LOC644157 | 2.218  | 2.32  |
| LOC644158 | 2.701  | 0     |
| LOC644159 | 7.769  | 0     |
| LOC644160 | 1.116  | 0     |
| LOC644165 | 4.606  | 0.06  |
| LOC644166 | 0.658  | 0     |

|           |        |       |
|-----------|--------|-------|
| LOC644168 | 0.807  | 0     |
| LOC644169 | 2.049  | 1.69  |
| LOC644170 | 2.138  | 0.04  |
| LOC644171 | 0.755  | 0     |
| LOC644172 | 1.302  | 1.59  |
| LOC644173 | 1.373  | 0.36  |
| LOC644181 | 8.738  | 0     |
| LOC644182 | 0.531  | 0     |
| LOC644186 | 0.442  | 0     |
| LOC644189 | 1.723  | 0     |
| LOC644191 | 0.784  | 0     |
| LOC644192 | 0.441  | 0     |
| LOC644193 | 0.975  | 0     |
| LOC644196 | 4.271  | 0.02  |
| LOC644198 | 0.346  | 33.74 |
| LOC644199 | 79.287 | 0     |
| LOC644201 | 3.946  | 0     |
| LOC644202 | 2.569  | 0.08  |
| LOC644203 | 1.556  | 0     |
| LOC644213 | 5.275  | 0.04  |
| LOC644214 | 0.879  | 0.34  |
| LOC644215 | 0.829  | 0.48  |
| LOC644216 | 0.513  | 0     |
| LOC644220 | 1.126  | 8.96  |
| LOC644222 | 0.586  | 0     |
| LOC644223 | 0.577  | 0.52  |
| LOC644224 | 1.077  | 0     |
| LOC644231 | 68.093 | 0.15  |
| LOC644232 | 25.923 | 0.02  |
| LOC644233 | 11.936 | 0     |
| LOC644235 | 5.458  | 0.9   |
| LOC644236 | 0.794  | 1.37  |
| LOC644237 | 2.399  | 0     |
| LOC644248 | 2.756  | 0     |
| LOC644249 | 0.615  | 0     |
| LOC644251 | 1.008  | 0     |
| LOC644253 | 1.272  | 1.71  |
| LOC644256 | 1.573  | 2.9   |
| LOC644261 | 0.923  | 0.11  |
| LOC644264 | 1.556  | 0.57  |
| LOC644265 | 0.261  | 0     |
| LOC644269 | 14.45  | 0.03  |
| LOC644276 | 0.777  | 0     |
| LOC644277 | 1.992  | 0     |
| LOC644280 | 1.167  | 0     |
| LOC644282 | 2.645  | 0.56  |
| LOC644285 | 2.484  | 0.16  |
| LOC644295 | 0.759  | 5.47  |
| LOC644297 | 2.176  | 0.18  |
| LOC644302 | 0.609  | 0     |

|           |        |       |
|-----------|--------|-------|
| LOC644303 | 2.558  | 0.08  |
| LOC644310 | 0.192  | 5.15  |
| LOC644315 | 0.72   | 39.57 |
| LOC644325 | 2.072  | 0     |
| LOC644328 | 1.567  | 1.01  |
| LOC644330 | 2.672  | 7.48  |
| LOC644333 | 0.776  | 3.32  |
| LOC644334 | 0.258  | 0     |
| LOC644335 | 33.018 | 0     |
| LOC644339 | 51.5   | 0     |
| LOC644350 | 0.794  | 0     |
| LOC644353 | 5.825  | 3.02  |
| LOC644354 | 0.345  | 0     |
| LOC644357 | 0.711  | 0.14  |
| LOC644361 | 0.834  | 0     |
| LOC644363 | 3.306  | 1.61  |
| LOC644366 | 0.589  | 0     |
| LOC644368 | 0.786  | 0     |
| LOC644369 | 11.833 | 0.02  |
| LOC644378 | 1.176  | 0     |
| LOC644383 | 5.139  | 0.17  |
| LOC644384 | 0.526  | 0.19  |
| LOC644387 | 1.619  | 0.36  |
| LOC644390 | 6.15   | 9.5   |
| LOC644397 | 2.718  | 0.18  |
| LOC644402 | 0.429  | 0     |
| LOC644403 | 1.194  | 0.08  |
| LOC644410 | 1.035  | 0.1   |
| LOC644415 | 0.837  | 0.35  |
| LOC644419 | 0.195  | 0     |
| LOC644422 | 1.445  | 9.38  |
| LOC644425 | 0.485  | 0.2   |
| LOC644429 | 2.565  | 0     |
| LOC644431 | 0.42   | 0     |
| LOC644436 | 1.34   | 0.22  |
| LOC644442 | 0.607  | 0.16  |
| LOC644445 | 1.584  | 0     |
| LOC644449 | 1.132  | 0     |
| LOC644451 | 2.116  | 0.19  |
| LOC644456 | 2.12   | 9.38  |
| LOC644459 | 9.664  | 0.05  |
| LOC644462 | 2.215  | 0.4   |
| LOC644464 | 1.03   | 1.06  |
| LOC644467 | 43.402 | 0.02  |
| LOC644472 | 0.963  | 0     |
| LOC644477 | 0.492  | 0     |
| LOC644482 | 0.243  | 0     |
| LOC644484 | 2.079  | 0     |
| LOC644489 | 0.547  | 0     |
| LOC644491 | 6.54   | 0.04  |

|           |         |       |
|-----------|---------|-------|
| LOC644495 | 4.245   | 0.02  |
| LOC644496 | 8.191   | 0     |
| LOC644497 | 0.69    | 0     |
| LOC644498 | 0.444   | 0.22  |
| LOC644500 | 0.789   | 0     |
| LOC644502 | 0.59    | 0     |
| LOC644504 | 0.282   | 0     |
| LOC644509 | 1.993   | 0     |
| LOC644511 | 0.587   | 75.34 |
| LOC644517 | 12.366  | 0     |
| LOC644518 | 11.775  | 0     |
| LOC644522 | 9.64    | 0.15  |
| LOC644524 | 1.687   | 0     |
| LOC644525 | 0.677   | 0     |
| LOC644528 | 0.939   | 0     |
| LOC644534 | 0.303   | 1.31  |
| LOC644538 | 1.612   | 0     |
| LOC644540 | 0.348   | 0     |
| LOC644541 | 0.43    | 0     |
| LOC644548 | 0.735   | 0.54  |
| LOC644554 | 0.674   | 0     |
| LOC644556 | 1.041   | 1.05  |
| LOC644557 | 15.885  | 0     |
| LOC644558 | 0.831   | 0     |
| LOC644563 | 11.057  | 0.28  |
| LOC644565 | 0.324   | 0     |
| LOC644566 | 4.687   | 0.36  |
| LOC644567 | 1.572   | 0     |
| LOC644569 | 0.156   | 0     |
| LOC644573 | 23.97   | 0.01  |
| LOC644576 | 2.199   | 0     |
| LOC644578 | 0.348   | 0     |
| LOC644587 | 1.553   | 0     |
| LOC644588 | 1.193   | 3.07  |
| LOC644589 | 0.249   | 4.77  |
| LOC644590 | 0.39    | 12.18 |
| LOC644591 | 3.856   | 0.03  |
| LOC644592 | 0.864   | 0     |
| LOC644596 | 0.237   | 0     |
| LOC644600 | 10.961  | 0     |
| LOC644601 | 48.905  | 0     |
| LOC644602 | 2.358   | 0     |
| LOC644604 | 1.635   | 7.32  |
| LOC644616 | 1.144   | 0.18  |
| LOC644618 | 54.942  | 0     |
| LOC644619 | 69.31   | 0.04  |
| LOC644620 | 40.227  | 0.01  |
| LOC644623 | 117.217 | 0     |
| LOC644624 | 0.378   | 0     |
| LOC644632 | 4.769   | 0     |

|           |         |       |
|-----------|---------|-------|
| LOC644634 | 4.466   | 0.9   |
| LOC644637 | 2.172   | 0     |
| LOC644638 | 0.557   | 0     |
| LOC644644 | 1.128   | 0     |
| LOC644649 | 4.125   | 0.14  |
| LOC644651 | 0.612   | 0     |
| LOC644652 | 1.494   | 0     |
| LOC644653 | 19.875  | 0.01  |
| LOC644659 | 0.255   | 0     |
| LOC644660 | 2.041   | 0.1   |
| LOC644661 | 45.422  | 0.05  |
| LOC644662 | 1.05    | 0     |
| LOC644669 | 22.637  | 0     |
| LOC644670 | 1.956   | 0     |
| LOC644674 | 1.325   | 0     |
| LOC644681 | 0.288   | 0     |
| LOC644682 | 0.27    | 0     |
| LOC644684 | 9.502   | 0     |
| LOC644691 | 0.222   | 0     |
| LOC644693 | 6.033   | 0.41  |
| LOC644694 | 2.089   | 0     |
| LOC644695 | 0.373   | 0     |
| LOC644697 | 2.192   | 0     |
| LOC644701 | 0.864   | 1.26  |
| LOC644704 | 1.368   | 0     |
| LOC644711 | 1.104   | 0     |
| LOC644714 | 3.156   | 18.99 |
| LOC644717 | 1.23    | 0     |
| LOC644718 | 0.702   | 0     |
| LOC644721 | 0.75    | 0     |
| LOC644723 | 0.529   | 0     |
| LOC644727 | 2.242   | 1.94  |
| LOC644728 | 1.977   | 0     |
| LOC644730 | 0.574   | 0     |
| LOC644732 | 3.234   | 0     |
| LOC644734 | 189.212 | 0     |
| LOC644739 | 4.444   | 3.85  |
| LOC644743 | 1.569   | 0     |
| LOC644745 | 2.379   | 1.33  |
| LOC644746 | 5.714   | 0     |
| LOC644749 | 0.285   | 0     |
| LOC644753 | 0.446   | 0     |
| LOC644754 | 0.552   | 0.71  |
| LOC644755 | 0.264   | 0     |
| LOC644756 | 1.929   | 0     |
| LOC644758 | 2.068   | 0     |
| LOC644759 | 6.21    | 0     |
| LOC644761 | 1.509   | 5.5   |
| LOC644762 | 1.591   | 1.06  |
| LOC644764 | 0.318   | 0     |

|           |        |      |
|-----------|--------|------|
| LOC644768 | 50.749 | 0    |
| LOC644773 | 1.338  | 0    |
| LOC644776 | 1.148  | 0.52 |
| LOC644777 | 7.768  | 0    |
| LOC644779 | 0.435  | 0.68 |
| LOC644780 | 28.39  | 0    |
| LOC644787 | 0.498  | 0    |
| LOC644790 | 0.507  | 2.54 |
| LOC644791 | 0.585  | 3.56 |
| LOC644794 | 0.618  | 3.52 |
| LOC644800 | 2.805  | 0.95 |
| LOC644811 | 6.212  | 0    |
| LOC644813 | 0.783  | 0    |
| LOC644816 | 0.222  | 0.44 |
| LOC644817 | 6.142  | 2.69 |
| LOC644822 | 51.808 | 0.01 |
| LOC644827 | 0.279  | 0.35 |
| LOC644828 | 0.711  | 0    |
| LOC644835 | 0.603  | 0    |
| LOC644838 | 0.571  | 0.17 |
| LOC644841 | 4.016  | 0    |
| LOC644844 | 0.534  | 0    |
| LOC644850 | 1.009  | 1.96 |
| LOC644852 | 3.246  | 0    |
| LOC644854 | 4.915  | 0.18 |
| LOC644860 | 2.48   | 0.04 |
| LOC644862 | 0.21   | 0.47 |
| LOC644868 | 2.268  | 0.09 |
| LOC644870 | 3.338  | 0.12 |
| LOC644871 | 4.257  | 0.42 |
| LOC644877 | 1.042  | 3.23 |
| LOC644879 | 0.866  | 1.83 |
| LOC644881 | 0.802  | 0.12 |
| LOC644885 | 0.843  | 0.12 |
| LOC644889 | 0.515  | 0    |
| LOC644892 | 1.722  | 0.69 |
| LOC644893 | 0.954  | 0    |
| LOC644896 | 0.79   | 0.37 |
| LOC644899 | 1.023  | 0.1  |
| LOC644906 | 0.98   | 0.3  |
| LOC644909 | 51.151 | 0.03 |
| LOC644911 | 0.642  | 5.09 |
| LOC644914 | 1.04   | 0.76 |
| LOC644915 | 1.288  | 0    |
| LOC644924 | 56.141 | 0.03 |
| LOC644925 | 1.558  | 0.19 |
| LOC644926 | 0.159  | 0    |
| LOC644931 | 0.357  | 0    |
| LOC644934 | 0.447  | 0.22 |
| LOC644935 | 1.04   | 0.67 |



|           |        |       |
|-----------|--------|-------|
| LOC644936 | 4.282  | 1.69  |
| LOC644937 | 0.432  | 3.9   |
| LOC644941 | 0.695  | 0     |
| LOC644943 | 1.848  | 0.05  |
| LOC644949 | 2.046  | 0.87  |
| LOC644950 | 0.407  | 0     |
| LOC644953 | 0.921  | 0     |
| LOC644961 | 4.243  | 9.98  |
| LOC644969 | 0.662  | 78.01 |
| LOC644972 | 0.867  | 7.08  |
| LOC644974 | 1.604  | 0.06  |
| LOC644976 | 0.526  | 0     |
| LOC644978 | 0.672  | 0.15  |
| LOC644979 | 2.055  | 0.04  |
| LOC644982 | 3.609  | 0     |
| LOC644988 | 5.309  | 0.28  |
| LOC644990 | 1.071  | 0     |
| LOC644992 | 0.312  | 0     |
| LOC644993 | 0.451  | 2.41  |
| LOC644994 | 1.014  | 0     |
| LOC644996 | 0.403  | 0.74  |
| LOC644998 | 5.002  | 0     |
| LOC645000 | 6.028  | 8.83  |
| LOC645001 | 2.891  | 0.65  |
| LOC645003 | 2.049  | 0     |
| LOC645015 | 1.821  | 0.16  |
| LOC645018 | 1.6    | 1.73  |
| LOC645023 | 0.51   | 0     |
| LOC645024 | 0.83   | 0.24  |
| LOC645027 | 13.885 | 0     |
| LOC645030 | 0.386  | 0     |
| LOC645037 | 0.542  | 0     |
| LOC645045 | 1.017  | 0.29  |
| LOC645047 | 3.932  | 0.03  |
| LOC645053 | 0.371  | 1.6   |
| LOC645054 | 0.856  | 0.46  |
| LOC645065 | 1.37   | 0.07  |
| LOC645086 | 1.496  | 3.83  |
| LOC645088 | 0.549  | 0     |
| LOC645089 | 1.62   | 0     |
| LOC645090 | 2.496  | 0     |
| LOC645094 | 0.507  | 6.63  |
| LOC645097 | 39.349 | 0.02  |
| LOC645101 | 0.596  | 4.82  |
| LOC645108 | 0.638  | 0.15  |
| LOC645118 | 0.21   | 0     |
| LOC645120 | 4.715  | 0.06  |
| LOC645125 | 26.327 | 0.1   |
| LOC645126 | 0.201  | 0.49  |
| LOC645129 | 1.622  | 0.85  |

|           |        |       |
|-----------|--------|-------|
| LOC645132 | 22.845 | 0.03  |
| LOC645135 | 3.868  | 0.05  |
| LOC645136 | 0.246  | 0     |
| LOC645137 | 3.389  | 0     |
| LOC645139 | 1.671  | 8.77  |
| LOC645145 | 0.378  | 0     |
| LOC645146 | 0.496  | 0     |
| LOC645149 | 0.222  | 0     |
| LOC645157 | 0.516  | 0.57  |
| LOC645158 | 2.013  | 3.15  |
| LOC645159 | 0.798  | 0     |
| LOC645161 | 0.84   | 0.12  |
| LOC645162 | 41.631 | 0     |
| LOC645163 | 3.102  | 0     |
| LOC645166 | 0.818  | 0     |
| LOC645173 | 0.948  | 1.98  |
| LOC645174 | 0.557  | 0.71  |
| LOC645175 | 1.45   | 0.48  |
| LOC645177 | 1.506  | 0     |
| LOC645180 | 1.656  | 0     |
| LOC645181 | 0.75   | 0.4   |
| LOC645183 | 1.128  | 0     |
| LOC645188 | 0.679  | 0     |
| LOC645195 | 2.002  | 0     |
| LOC645197 | 2.655  | 0     |
| LOC645201 | 10.871 | 0.01  |
| LOC645202 | 3.602  | 0.03  |
| LOC645203 | 0.345  | 17.49 |
| LOC645204 | 25.006 | 0.26  |
| LOC645207 | 4.782  | 0.21  |
| LOC645210 | 1.335  | 0     |
| LOC645212 | 1.436  | 0.9   |
| LOC645218 | 0.698  | 0     |
| LOC645220 | 0.237  | 0     |
| LOC645221 | 56.556 | 0.03  |
| LOC645225 | 0.258  | 0     |
| LOC645226 | 3.105  | 0     |
| LOC645227 | 0.456  | 0     |
| LOC645231 | 2.127  | 0     |
| LOC645233 | 3.097  | 0.77  |
| LOC645237 | 3.613  | 0.49  |
| LOC645246 | 0.975  | 0     |
| LOC645249 | 2.482  | 0     |
| LOC645251 | 47.893 | 0     |
| LOC645253 | 0.714  | 0     |
| LOC645256 | 0.979  | 0.1   |
| LOC645257 | 1.297  | 0.15  |
| LOC645261 | 1.889  | 0     |
| LOC645262 | 0.525  | 0     |
| LOC645264 | 3.235  | 0.21  |

|           |        |       |
|-----------|--------|-------|
| LOC645266 | 3.097  | 0.92  |
| LOC645269 | 0.378  | 0.26  |
| LOC645272 | 51.092 | 0.01  |
| LOC645273 | 0.466  | 0     |
| LOC645276 | 0.534  | 0.19  |
| LOC645277 | 0.731  | 0     |
| LOC645280 | 31.153 | 0.01  |
| LOC645282 | 0.528  | 0     |
| LOC645291 | 2.618  | 1.17  |
| LOC645292 | 2.325  | 8.72  |
| LOC645294 | 30.748 | 0.1   |
| LOC645297 | 14.758 | 0     |
| LOC645299 | 0.496  | 0     |
| LOC645301 | 6.513  | 1.56  |
| LOC645302 | 1.437  | 0     |
| LOC645306 | 23.369 | 0     |
| LOC645307 | 3.875  | 0.17  |
| LOC645311 | 23.687 | 0.04  |
| LOC645312 | 0.656  | 1.81  |
| LOC645313 | 3.75   | 0.08  |
| LOC645314 | 1.884  | 0.27  |
| LOC645317 | 1.574  | 21.24 |
| LOC645318 | 0.905  | 2.73  |
| LOC645319 | 2.882  | 0     |
| LOC645320 | 0.539  | 0     |
| LOC645321 | 2.385  | 0     |
| LOC645323 | 1.115  | 0     |
| LOC645324 | 3.554  | 0.03  |
| LOC645326 | 1.548  | 0     |
| LOC645328 | 3.127  | 0     |
| LOC645339 | 0.769  | 0.12  |
| LOC645347 | 0.934  | 0.96  |
| LOC645348 | 11.356 | 0     |
| LOC645354 | 3.232  | 0     |
| LOC645355 | 0.836  | 0     |
| LOC645357 | 0.693  | 0     |
| LOC645359 | 1.52   | 0     |
| LOC645360 | 0.675  | 0     |
| LOC645367 | 2.484  | 0     |
| LOC645368 | 0.639  | 15.17 |
| LOC645371 | 0.21   | 0     |
| LOC645373 | 0.846  | 0     |
| LOC645379 | 0.927  | 0     |
| LOC645381 | 0.603  | 36.75 |
| LOC645382 | 9.414  | 0     |
| LOC645385 | 21.039 | 0     |
| LOC645387 | 0.959  | 26.82 |
| LOC645388 | 2.449  | 0     |
| LOC645390 | 5.782  | 0     |
| LOC645395 | 0.846  | 0     |

|           |        |      |
|-----------|--------|------|
| LOC645397 | 0.375  | 0.27 |
| LOC645398 | 0.856  | 0    |
| LOC645399 | 9.414  | 0    |
| LOC645402 | 1.593  | 0    |
| LOC645405 | 1.222  | 0.08 |
| LOC645412 | 2.026  | 0.63 |
| LOC645415 | 8.724  | 0    |
| LOC645417 | 0.336  | 0    |
| LOC645420 | 0.417  | 0    |
| LOC645422 | 1.107  | 1.97 |
| LOC645423 | 0.923  | 0    |
| LOC645426 | 2.949  | 0.1  |
| LOC645430 | 1.804  | 0.33 |
| LOC645431 | 2.111  | 0.37 |
| LOC645433 | 1.679  | 0    |
| LOC645436 | 0.963  | 0    |
| LOC645440 | 0.813  | 1.95 |
| LOC645443 | 5.269  | 4.34 |
| LOC645446 | 0.605  | 0    |
| LOC645447 | 0.579  | 2.91 |
| LOC645448 | 1.344  | 0    |
| LOC645452 | 0.845  | 0.47 |
| LOC645453 | 2.65   | 0.82 |
| LOC645464 | 2.427  | 0    |
| LOC645466 | 1.782  | 0.66 |
| LOC645468 | 3.385  | 1.31 |
| LOC645470 | 0.543  | 0    |
| LOC645474 | 17.506 | 0.02 |
| LOC645478 | 0.519  | 0    |
| LOC645479 | 22.336 | 0.03 |
| LOC645481 | 0.513  | 0    |
| LOC645482 | 6.114  | 0.08 |
| LOC645485 | 2.14   | 0.04 |
| LOC645486 | 64.701 | 0.99 |
| LOC645489 | 0.273  | 0    |
| LOC645490 | 1.134  | 0.26 |
| LOC645495 | 0.543  | 0    |
| LOC645503 | 20.692 | 0.02 |
| LOC645504 | 0.327  | 0    |
| LOC645506 | 0.994  | 5.48 |
| LOC645508 | 0.132  | 0    |
| LOC645513 | 2.66   | 1.23 |
| LOC645515 | 1.235  | 1.44 |
| LOC645521 | 1.093  | 0    |
| LOC645527 | 1.059  | 0    |
| LOC645528 | 3.398  | 0.18 |
| LOC645529 | 1.047  | 0.19 |
| LOC645534 | 3.157  | 0    |
| LOC645538 | 1.31   | 0    |
| LOC645544 | 5.059  | 0    |

|           |        |       |
|-----------|--------|-------|
| LOC645548 | 1.826  | 0.11  |
| LOC645551 | 4.576  | 0     |
| LOC645553 | 1.644  | 0     |
| LOC645558 | 1.954  | 0     |
| LOC645560 | 0.896  | 4.97  |
| LOC645561 | 0.958  | 0     |
| LOC645565 | 0.831  | 2.14  |
| LOC645571 | 0.548  | 0.18  |
| LOC645572 | 1.954  | 0     |
| LOC645573 | 0.694  | 0.14  |
| LOC645579 | 7.719  | 3.75  |
| LOC645581 | 0.786  | 0     |
| LOC645586 | 2.462  | 0     |
| LOC645587 | 0.366  | 0     |
| LOC645590 | 0.297  | 0     |
| LOC645592 | 1.08   | 0     |
| LOC645598 | 2.744  | 0.18  |
| LOC645602 | 1.505  | 0.6   |
| LOC645603 | 4.667  | 0     |
| LOC645605 | 0.96   | 0     |
| LOC645614 | 5.607  | 0     |
| LOC645615 | 3.909  | 0.53  |
| LOC645617 | 0.924  | 4.5   |
| LOC645619 | 3.497  | 0.06  |
| LOC645620 | 1.041  | 0.38  |
| LOC645626 | 0.92   | 0     |
| LOC645627 | 0.855  | 0     |
| LOC645630 | 0.117  | 73.57 |
| LOC645634 | 14.299 | 0.09  |
| LOC645638 | 0.452  | 0     |
| LOC645641 | 0.309  | 0.32  |
| LOC645646 | 4.776  | 0.06  |
| LOC645650 | 0.522  | 0     |
| LOC645651 | 1.954  | 0     |
| LOC645652 | 0.475  | 8.33  |
| LOC645654 | 0.377  | 1.05  |
| LOC645655 | 0.555  | 0.53  |
| LOC645657 | 3.379  | 0     |
| LOC645666 | 24.799 | 0.02  |
| LOC645668 | 1.358  | 7.28  |
| LOC645676 | 3.116  | 5.87  |
| LOC645680 | 0.561  | 0.18  |
| LOC645682 | 1.396  | 0     |
| LOC645683 | 0.641  | 4.02  |
| LOC645685 | 0.66   | 0     |
| LOC645687 | 1.166  | 0     |
| LOC645688 | 2.338  | 0.17  |
| LOC645691 | 1.679  | 0.76  |
| LOC645693 | 1.421  | 4.04  |
| LOC645694 | 45.716 | 0     |

|           |        |       |
|-----------|--------|-------|
| LOC645700 | 0.915  | 0     |
| LOC645704 | 54.064 | 0.21  |
| LOC645705 | 0.276  | 0     |
| LOC645715 | 1.697  | 3.61  |
| LOC645716 | 0.507  | 0     |
| LOC645722 | 0.572  | 0     |
| LOC645726 | 7.746  | 0.28  |
| LOC645730 | 1.365  | 0     |
| LOC645733 | 0.901  | 0     |
| LOC645740 | 13.772 | 0.05  |
| LOC645744 | 1.254  | 4.74  |
| LOC645747 | 0.428  | 0.23  |
| LOC645749 | 4.943  | 0.06  |
| LOC645752 | 3.455  | 0.06  |
| LOC645755 | 0.636  | 0     |
| LOC645757 | 1.122  | 0     |
| LOC645762 | 0.49   | 0     |
| LOC645763 | 4.639  | 0.1   |
| LOC645769 | 2.445  | 0     |
| LOC645771 | 65.195 | 0.11  |
| LOC645773 | 2.713  | 0     |
| LOC645776 | 0.996  | 0     |
| LOC645781 | 1.077  | 0.09  |
| LOC645787 | 11.822 | 0     |
| LOC645790 | 1.658  | 0     |
| LOC645794 | 0.573  | 0     |
| LOC645798 | 1.213  | 1.22  |
| LOC645799 | 1.1    | 0.09  |
| LOC645804 | 31.094 | 0.04  |
| LOC645805 | 0.871  | 29.08 |
| LOC645807 | 1.894  | 5.59  |
| LOC645808 | 1.702  | 0.23  |
| LOC645809 | 0.435  | 0     |
| LOC645811 | 2.495  | 3.64  |
| LOC645817 | 0.576  | 0     |
| LOC645822 | 13.444 | 0.23  |
| LOC645830 | 0.321  | 0     |
| LOC645834 | 5.984  | 0.02  |
| LOC645836 | 1.593  | 0     |
| LOC645839 | 0.516  | 0.38  |
| LOC645841 | 6.527  | 0.03  |
| LOC645842 | 7.093  | 0.22  |
| LOC645843 | 1.296  | 0     |
| LOC645846 | 0.802  | 0.25  |
| LOC645847 | 0.315  | 0     |
| LOC645848 | 0.525  | 0     |
| LOC645851 | 1.052  | 1.69  |
| LOC645852 | 0.837  | 1.77  |
| LOC645853 | 0.92   | 0.64  |
| LOC645857 | 0.572  | 0.35  |

|           |         |       |
|-----------|---------|-------|
| LOC645859 | 0.435   | 0     |
| LOC645862 | 0.418   | 0     |
| LOC645864 | 1.011   | 0     |
| LOC645870 | 1.009   | 5.69  |
| LOC645874 | 1.287   | 6     |
| LOC645877 | 0.267   | 0     |
| LOC645879 | 1.954   | 0     |
| LOC645884 | 6.698   | 0.04  |
| LOC645895 | 2.103   | 0.28  |
| LOC645899 | 0.424   | 18.9  |
| LOC645900 | 6.469   | 0     |
| LOC645904 | 1.202   | 0.16  |
| LOC645914 | 0.468   | 0     |
| LOC645915 | 0.561   | 0     |
| LOC645916 | 3.873   | 0.15  |
| LOC645927 | 0.285   | 2.43  |
| LOC645930 | 0.198   | 0     |
| LOC645931 | 2.028   | 0.39  |
| LOC645932 | 1.056   | 0     |
| LOC645934 | 101.179 | 0.01  |
| LOC645936 | 4.572   | 0.73  |
| LOC645937 | 1.142   | 1.12  |
| LOC645938 | 0.845   | 5.38  |
| LOC645939 | 5.882   | 0     |
| LOC645940 | 1.251   | 0.63  |
| LOC645941 | 0.717   | 0     |
| LOC645944 | 3.352   | 6.26  |
| LOC645946 | 0.825   | 0     |
| LOC645947 | 0.306   | 0.97  |
| LOC645949 | 2.391   | 0     |
| LOC645950 | 0.914   | 0.44  |
| LOC645954 | 59.13   | 0.03  |
| LOC645955 | 0.448   | 0     |
| LOC645957 | 1.667   | 6.11  |
| LOC645958 | 1.67    | 46.39 |
| LOC645960 | 6.958   | 0.37  |
| LOC645961 | 19.569  | 0     |
| LOC645962 | 0.469   | 0     |
| LOC645964 | 0.968   | 0     |
| LOC645965 | 1.434   | 3.18  |
| LOC645966 | 0.738   | 2.41  |
| LOC645967 | 1.206   | 0.25  |
| LOC645968 | 0.793   | 0.5   |
| LOC645969 | 0.492   | 22.32 |
| LOC645971 | 0.837   | 0     |
| LOC645973 | 0.808   | 0     |
| LOC645978 | 2.83    | 0.07  |
| LOC645979 | 0.437   | 0     |
| LOC645980 | 34.123  | 0.01  |
| LOC645984 | 2.8     | 0.04  |

|           |        |       |
|-----------|--------|-------|
| LOC645987 | 0.384  | 0.52  |
| LOC645991 | 0.384  | 0     |
| LOC646004 | 0.585  | 0     |
| LOC646012 | 0.42   | 0     |
| LOC646013 | 0.418  | 4.03  |
| LOC646014 | 0.303  | 1.96  |
| LOC646016 | 51.106 | 0     |
| LOC646019 | 0.792  | 0     |
| LOC646021 | 1.031  | 1.83  |
| LOC646022 | 2.478  | 14.45 |
| LOC646024 | 5.856  | 0     |
| LOC646030 | 2.434  | 0.16  |
| LOC646031 | 2.376  | 0     |
| LOC646034 | 0.42   | 0     |
| LOC646035 | 0.489  | 0     |
| LOC646037 | 1.761  | 0     |
| LOC646040 | 1.221  | 0.08  |
| LOC646043 | 1.198  | 0.08  |
| LOC646044 | 3.344  | 0.5   |
| LOC646048 | 10.095 | 0.88  |
| LOC646049 | 0.273  | 0     |
| LOC646050 | 1.316  | 0.23  |
| LOC646051 | 0.453  | 0     |
| LOC646052 | 3.001  | 0     |
| LOC646053 | 3.508  | 0.12  |
| LOC646056 | 0.438  | 0.45  |
| LOC646057 | 0.903  | 0     |
| LOC646058 | 2.34   | 0     |
| LOC646065 | 0.738  | 0.27  |
| LOC646066 | 0.597  | 0     |
| LOC646070 | 0.465  | 0     |
| LOC646071 | 1.844  | 0     |
| LOC646074 | 2.459  | 0     |
| LOC646077 | 0.159  | 0     |
| LOC646079 | 1.25   | 0     |
| LOC646080 | 1.871  | 3.17  |
| LOC646085 | 1.315  | 0     |
| LOC646086 | 1.444  | 2.06  |
| LOC646087 | 0.68   | 0     |
| LOC646090 | 52.169 | 0     |
| LOC646091 | 3.38   | 0.03  |
| LOC646093 | 4.736  | 0     |
| LOC646096 | 0.807  | 0     |
| LOC646098 | 0.315  | 0     |
| LOC646103 | 0.597  | 0     |
| LOC646104 | 0.399  | 1.49  |
| LOC646106 | 0.135  | 0.73  |
| LOC646108 | 0.583  | 0.17  |
| LOC646112 | 2.123  | 0.04  |
| LOC646114 | 13.966 | 0.01  |



|           |        |        |
|-----------|--------|--------|
| LOC646118 | 0.68   | 1.31   |
| LOC646119 | 0.627  | 0.79   |
| LOC646120 | 0.745  | 0      |
| LOC646127 | 32.694 | 0.07   |
| LOC646130 | 0.645  | 0      |
| LOC646132 | 0.651  | 0      |
| LOC646139 | 2.358  | 0      |
| LOC646140 | 0.74   | 0      |
| LOC646158 | 1.197  | 0.08   |
| LOC646160 | 0.216  | 0      |
| LOC646161 | 2.298  | 0.04   |
| LOC646163 | 0.216  | 0      |
| LOC646164 | 2.965  | 0      |
| LOC646170 | 0.834  | 0      |
| LOC646171 | 2.811  | 0.81   |
| LOC646173 | 0.693  | 0      |
| LOC646174 | 0.904  | 0      |
| LOC646175 | 0.35   | 0      |
| LOC646177 | 0.933  | 0      |
| LOC646182 | 0.384  | 0      |
| LOC646184 | 0.183  | 0      |
| LOC646187 | 2.856  | 0.11   |
| LOC646189 | 0.531  | 1.49   |
| LOC646192 | 0.687  | 0      |
| LOC646195 | 0.648  | 400.94 |
| LOC646196 | 2.744  | 0.39   |
| LOC646197 | 10.647 | 0      |
| LOC646201 | 1.182  | 0      |
| LOC646202 | 17.155 | 1.2    |
| LOC646203 | 0.716  | 0.28   |
| LOC646208 | 1.038  | 0.38   |
| LOC646213 | 0.258  | 2.68   |
| LOC646214 | 6.629  | 1.09   |
| LOC646215 | 1.287  | 0      |
| LOC646216 | 1.924  | 0.52   |
| LOC646218 | 1.67   | 0      |
| LOC646220 | 2.227  | 11.2   |
| LOC646231 | 0.992  | 0      |
| LOC646236 | 0.57   | 0      |
| LOC646237 | 0.324  | 0      |
| LOC646243 | 8.309  | 0      |
| LOC646252 | 0.303  | 0      |
| LOC646253 | 4.973  | 0      |
| LOC646254 | 1.992  | 0      |
| LOC646255 | 1      | 3.96   |
| LOC646256 | 0.588  | 0      |
| LOC646260 | 0.258  | 0      |
| LOC646261 | 1.295  | 0      |
| LOC646262 | 1.989  | 0      |
| LOC646269 | 0.81   | 108.83 |

|           |        |      |
|-----------|--------|------|
| LOC646270 | 6.902  | 0.8  |
| LOC646272 | 0.219  | 0.45 |
| LOC646273 | 1.128  | 0    |
| LOC646274 | 46.883 | 0    |
| LOC646278 | 25.396 | 0    |
| LOC646279 | 0.585  | 6.43 |
| LOC646282 | 20.603 | 0.19 |
| LOC646285 | 0.84   | 1.3  |
| LOC646289 | 4.59   | 0    |
| LOC646290 | 4.497  | 0    |
| LOC646292 | 29.2   | 0    |
| LOC646294 | 0.946  | 2.2  |
| LOC646300 | 1.98   | 0.3  |
| LOC646301 | 2.659  | 0    |
| LOC646314 | 9.495  | 0    |
| LOC646316 | 2.85   | 0.03 |
| LOC646317 | 0.879  | 0    |
| LOC646322 | 5.843  | 0    |
| LOC646323 | 4.459  | 0    |
| LOC646324 | 0.706  | 0    |
| LOC646329 | 2.23   | 1.29 |
| LOC646330 | 9.46   | 0.15 |
| LOC646338 | 0.814  | 0.36 |
| LOC646340 | 15.818 | 0    |
| LOC646344 | 74.034 | 0.02 |
| LOC646346 | 6.222  | 0.08 |
| LOC646347 | 1.69   | 2.28 |
| LOC646348 | 0.213  | 4.65 |
| LOC646352 | 0.513  | 0    |
| LOC646357 | 0.479  | 0    |
| LOC646358 | 0.138  | 0    |
| LOC646359 | 1.514  | 0    |
| LOC646362 | 0.52   | 0    |
| LOC646363 | 0.723  | 0.41 |
| LOC646365 | 0.708  | 3.35 |
| LOC646366 | 0.486  | 0    |
| LOC646370 | 6.384  | 0    |
| LOC646373 | 7.365  | 0    |
| LOC646377 | 3.889  | 0    |
| LOC646378 | 1.804  | 0.17 |
| LOC646379 | 0.889  | 0    |
| LOC646382 | 5.824  | 0    |
| LOC646388 | 0.21   | 0    |
| LOC646392 | 0.543  | 1.28 |
| LOC646395 | 0.624  | 0    |
| LOC646396 | 26.249 | 0.95 |
| LOC646405 | 0.508  | 0    |
| LOC646407 | 0.237  | 0    |
| LOC646408 | 0.15   | 0    |
| LOC646410 | 0.822  | 0    |

|           |        |       |
|-----------|--------|-------|
| LOC646411 | 8.569  | 0     |
| LOC646417 | 0.467  | 0.43  |
| LOC646425 | 73.998 | 0.01  |
| LOC646430 | 2.122  | 0     |
| LOC646434 | 2.018  | 0.34  |
| LOC646437 | 0.726  | 0     |
| LOC646438 | 0.408  | 0.48  |
| LOC646439 | 0.348  | 0     |
| LOC646440 | 27.639 | 0.01  |
| LOC646442 | 0.774  | 0.38  |
| LOC646446 | 0.42   | 0     |
| LOC646448 | 0.657  | 0     |
| LOC646449 | 0.504  | 0     |
| LOC646450 | 1.604  | 1.72  |
| LOC646457 | 1.107  | 0     |
| LOC646462 | 0.315  | 0     |
| LOC646463 | 0.342  | 9.54  |
| LOC646467 | 0.916  | 0.11  |
| LOC646470 | 0.741  | 7.07  |
| LOC646471 | 2.81   | 1.62  |
| LOC646472 | 21.677 | 0.01  |
| LOC646476 | 0.794  | 0.25  |
| LOC646479 | 42.032 | 0     |
| LOC646482 | 1.674  | 0     |
| LOC646483 | 0.919  | 94.63 |
| LOC646484 | 3.408  | 0     |
| LOC646485 | 0.264  | 2.25  |
| LOC646486 | 0.423  | 0     |
| LOC646489 | 20.555 | 0.88  |
| LOC64649  | 0.469  | 0     |
| LOC646493 | 0.607  | 0     |
| LOC646496 | 0.642  | 40.99 |
| LOC646498 | 0.621  | 0     |
| LOC64650  | 0.42   | 0     |
| LOC646500 | 0.693  | 0     |
| LOC646505 | 0.171  | 6.36  |
| LOC646506 | 2.257  | 0     |
| LOC646507 | 0.933  | 0     |
| LOC646508 | 0.939  | 0     |
| LOC646509 | 0.726  | 0.41  |
| LOC646510 | 1.017  | 0.78  |
| LOC646517 | 4.313  | 4.2   |
| LOC646520 | 0.69   | 0     |
| LOC646522 | 1.445  | 0     |
| LOC646526 | 0.621  | 0     |
| LOC646527 | 0.793  | 0.62  |
| LOC646531 | 19.922 | 0.79  |
| LOC646532 | 12.163 | 0.88  |
| LOC646535 | 1.725  | 0.05  |
| LOC646538 | 12.776 | 0.03  |

|           |        |      |
|-----------|--------|------|
| LOC646543 | 0.986  | 0    |
| LOC646547 | 18.16  | 0.19 |
| LOC646548 | 2.469  | 0    |
| LOC646555 | 4.161  | 1.21 |
| LOC646556 | 0.267  | 1.48 |
| LOC646557 | 3.469  | 0.08 |
| LOC646560 | 1.01   | 0    |
| LOC646561 | 2.847  | 2.29 |
| LOC646565 | 57.257 | 0    |
| LOC646566 | 0.29   | 1.02 |
| LOC646567 | 0.58   | 0    |
| LOC646569 | 0.384  | 0    |
| LOC646570 | 1.218  | 0    |
| LOC646572 | 1.587  | 0.75 |
| LOC646574 | 0.93   | 1.07 |
| LOC646575 | 5.727  | 0.02 |
| LOC646576 | 1.368  | 0.36 |
| LOC646577 | 0.625  | 0.16 |
| LOC646578 | 0.693  | 1.72 |
| LOC646579 | 0.6    | 0    |
| LOC646581 | 0.27   | 0    |
| LOC646583 | 0.835  | 0.12 |
| LOC646584 | 0.6    | 0    |
| LOC646585 | 0.807  | 0    |
| LOC646587 | 3.492  | 0.03 |
| LOC646588 | 3.74   | 0.11 |
| LOC646590 | 0.497  | 0    |
| LOC646595 | 0.513  | 0.77 |
| LOC646596 | 0.186  | 0    |
| LOC646597 | 0.632  | 0.31 |
| LOC646603 | 0.846  | 0    |
| LOC646604 | 0.558  | 0    |
| LOC646608 | 2.298  | 0    |
| LOC646609 | 13.915 | 0.1  |
| LOC646610 | 20.633 | 0    |
| LOC646612 | 49.697 | 0.07 |
| LOC646614 | 1.96   | 0.91 |
| LOC646616 | 1.339  | 0.88 |
| LOC646619 | 0.147  | 0    |
| LOC646620 | 3.722  | 0.13 |
| LOC646625 | 0.96   | 0    |
| LOC646626 | 0.748  | 0.27 |
| LOC646628 | 0.387  | 2.81 |
| LOC646629 | 0.501  | 0    |
| LOC646639 | 1.062  | 0    |
| LOC646640 | 3.219  | 0    |
| LOC646641 | 0.724  | 0    |
| LOC646643 | 2.037  | 0.39 |
| LOC646644 | 0.648  | 7.03 |
| LOC646649 | 0.612  | 0.32 |

|           |        |        |
|-----------|--------|--------|
| LOC646654 | 0.444  | 0      |
| LOC646658 | 2.266  | 0      |
| LOC646666 | 0.808  | 0      |
| LOC646667 | 1.479  | 0      |
| LOC646670 | 2.097  | 0.05   |
| LOC646672 | 0.633  | 1.41   |
| LOC646674 | 1.261  | 0.24   |
| LOC646675 | 0.432  | 1.6    |
| LOC646677 | 0.351  | 0.84   |
| LOC646685 | 0.458  | 0.21   |
| LOC646688 | 1.378  | 4.02   |
| LOC646693 | 3.382  | 0      |
| LOC646696 | 1.168  | 1.19   |
| LOC646698 | 0.975  | 0      |
| LOC646700 | 1.026  | 0      |
| LOC646702 | 15.572 | 0.03   |
| LOC646709 | 1.432  | 0.07   |
| LOC646710 | 6.872  | 0.96   |
| LOC646712 | 0.47   | 0      |
| LOC646719 | 2.85   | 3.5    |
| LOC646720 | 0.994  | 0      |
| LOC646721 | 63.83  | 0.27   |
| LOC646723 | 1.292  | 0      |
| LOC646730 | 0.864  | 0      |
| LOC646735 | 3.183  | 0.06   |
| LOC646736 | 1.355  | 0      |
| LOC646737 | 1.466  | 0.07   |
| LOC646745 | 0.621  | 0      |
| LOC646746 | 1.026  | 0      |
| LOC646749 | 3.114  | 0      |
| LOC646751 | 0.681  | 0      |
| LOC646753 | 0.448  | 0.22   |
| LOC646754 | 1.353  | 0      |
| LOC646755 | 4.643  | 0.06   |
| LOC646756 | 1.005  | 1.57   |
| LOC646758 | 1.14   | 1.04   |
| LOC646761 | 3.515  | 0      |
| LOC646762 | 8.18   | 0.11   |
| LOC646766 | 1.004  | 53.12  |
| LOC646770 | 8.896  | 0      |
| LOC646773 | 14.009 | 0      |
| LOC646774 | 0.884  | 0      |
| LOC646778 | 2.194  | 0.09   |
| LOC646779 | 0.415  | 0      |
| LOC646784 | 0.976  | 1.02   |
| LOC646785 | 0.592  | 230.46 |
| LOC646787 | 0.377  | 0.27   |
| LOC646791 | 1.002  | 22.32  |
| LOC646792 | 0.879  | 0      |
| LOC646794 | 1.873  | 0.32   |

|           |         |       |
|-----------|---------|-------|
| LOC646795 | 0.627   | 0     |
| LOC646797 | 75.003  | 0     |
| LOC646799 | 1.145   | 0.09  |
| LOC646800 | 0.576   | 0     |
| LOC646801 | 2.198   | 0.5   |
| LOC646802 | 2.026   | 0     |
| LOC646804 | 1.107   | 0     |
| LOC646805 | 22.255  | 0     |
| LOC646808 | 0.431   | 0     |
| LOC646810 | 19.477  | 0.1   |
| LOC646813 | 125.276 | 0.01  |
| LOC646817 | 1.808   | 0.38  |
| LOC646819 | 0.464   | 44.99 |
| LOC646820 | 2.1     | 0.47  |
| LOC646821 | 0.459   | 0.21  |
| LOC646823 | 0.834   | 0     |
| LOC646828 | 22.8    | 0.01  |
| LOC646836 | 0.24    | 9.89  |
| LOC646837 | 3.153   | 6.43  |
| LOC646839 | 43.369  | 0.14  |
| LOC646841 | 0.375   | 2.11  |
| LOC646842 | 38.885  | 0     |
| LOC646845 | 0.609   | 0.49  |
| LOC646849 | 0.805   | 0     |
| LOC646851 | 2.191   | 0.04  |
| LOC646853 | 0.273   | 0     |
| LOC646854 | 0.837   | 0     |
| LOC646860 | 11.312  | 0     |
| LOC646862 | 1.116   | 0     |
| LOC646863 | 0.357   | 0     |
| LOC646864 | 1.956   | 0     |
| LOC646869 | 1.347   | 0     |
| LOC646870 | 1.659   | 0.18  |
| LOC646871 | 1.162   | 0     |
| LOC646873 | 0.432   | 6.64  |
| LOC646874 | 1.479   | 1.34  |
| LOC646875 | 1.247   | 0.08  |
| LOC646877 | 3.112   | 0     |
| LOC646879 | 0.504   | 0     |
| LOC646880 | 11.657  | 0     |
| LOC646884 | 1.253   | 0     |
| LOC646886 | 0.414   | 0     |
| LOC646890 | 3.698   | 0.19  |
| LOC646891 | 8.861   | 0.07  |
| LOC646895 | 0.582   | 0.17  |
| LOC646902 | 0.969   | 0     |
| LOC646903 | 1.978   | 0     |
| LOC646907 | 9.297   | 0.02  |
| LOC646908 | 1.153   | 0     |
| LOC646909 | 0.554   | 1.43  |

|           |        |        |
|-----------|--------|--------|
| LOC646910 | 1.677  | 0      |
| LOC646912 | 5.08   | 0.13   |
| LOC646913 | 1.419  | 1.05   |
| LOC646915 | 2.942  | 0      |
| LOC646929 | 33.397 | 0      |
| LOC646932 | 1.035  | 0.1    |
| LOC646934 | 12.82  | 0.62   |
| LOC646936 | 1.538  | 0.06   |
| LOC646938 | 1.84   | 0.43   |
| LOC646939 | 1.593  | 0      |
| LOC646942 | 0.502  | 0.79   |
| LOC646945 | 0.336  | 0      |
| LOC646947 | 1.255  | 13.32  |
| LOC646949 | 0.495  | 694.36 |
| LOC646951 | 1.383  | 0      |
| LOC646953 | 0.234  | 0      |
| LOC646954 | 6.058  | 1.3    |
| LOC646956 | 5.23   | 0.09   |
| LOC646960 | 1.948  | 0      |
| LOC646966 | 0.49   | 1.61   |
| LOC646970 | 1.489  | 0.6    |
| LOC646973 | 2.916  | 2.2    |
| LOC646976 | 2.238  | 3.23   |
| LOC646980 | 74.49  | 0      |
| LOC646982 | 0.402  | 0      |
| LOC646985 | 0.195  | 1.01   |
| LOC646989 | 0.423  | 0      |
| LOC646992 | 0.624  | 1.27   |
| LOC646993 | 0.627  | 0.63   |
| LOC646995 | 2.722  | 0.47   |
| LOC646999 | 0.408  | 0      |
| LOC647000 | 1.137  | 0.09   |
| LOC647001 | 1.288  | 6.07   |
| LOC647002 | 0.7    | 2.97   |
| LOC647009 | 5.14   | 0.27   |
| LOC647011 | 1.116  | 0      |
| LOC647012 | 1.853  | 0.16   |
| LOC647013 | 1.169  | 0.17   |
| LOC647015 | 1.247  | 0      |
| LOC647016 | 0.195  | 0      |
| LOC647020 | 17.6   | 0.21   |
| LOC647024 | 0.814  | 0      |
| LOC647025 | 0.423  | 0      |
| LOC647030 | 0.792  | 9.74   |
| LOC647031 | 0.393  | 0.51   |
| LOC647034 | 0.207  | 104.68 |
| LOC647037 | 0.252  | 0      |
| LOC647038 | 0.467  | 0      |
| LOC647039 | 0.596  | 0      |
| LOC647041 | 0.963  | 0      |

|           |        |        |
|-----------|--------|--------|
| LOC647042 | 1.606  | 0      |
| LOC647044 | 0.816  | 0.12   |
| LOC647047 | 9.261  | 1.05   |
| LOC647049 | 0.904  | 0      |
| LOC647051 | 0.78   | 0.51   |
| LOC647054 | 0.71   | 0      |
| LOC647055 | 1.229  | 0      |
| LOC647057 | 19.587 | 0      |
| LOC647059 | 0.18   | 0      |
| LOC647060 | 4.161  | 0      |
| LOC647065 | 1.04   | 2.95   |
| LOC647066 | 0.911  | 2.5    |
| LOC647068 | 12.186 | 0.25   |
| LOC647069 | 1.371  | 0      |
| LOC647070 | 1.019  | 1.75   |
| LOC647073 | 32.36  | 0.22   |
| LOC647074 | 0.334  | 15.1   |
| LOC647076 | 6.461  | 1.23   |
| LOC647077 | 1.515  | 0.07   |
| LOC647081 | 1.266  | 0.31   |
| LOC647082 | 0.423  | 0.46   |
| LOC647085 | 0.542  | 0      |
| LOC647086 | 1.493  | 1.19   |
| LOC647087 | 1.548  | 4.34   |
| LOC647089 | 0.681  | 0      |
| LOC647094 | 0.909  | 0.21   |
| LOC647102 | 1.074  | 0      |
| LOC647104 | 0.636  | 0      |
| LOC647109 | 0.637  | 0      |
| LOC647112 | 0.41   | 119.93 |
| LOC647121 | 52.598 | 0.13   |
| LOC647126 | 2.437  | 0      |
| LOC647131 | 1.45   | 1.3    |
| LOC647132 | 14.769 | 0.04   |
| LOC647133 | 0.21   | 0      |
| LOC647134 | 0.417  | 0      |
| LOC647135 | 1.388  | 2.21   |
| LOC647137 | 3.068  | 0.04   |
| LOC647138 | 0.496  | 0      |
| LOC647144 | 3.521  | 0      |
| LOC647145 | 1.65   | 0      |
| LOC647150 | 2.816  | 1.19   |
| LOC647154 | 0.332  | 0      |
| LOC647155 | 0.391  | 0.76   |
| LOC647156 | 1.338  | 0      |
| LOC647157 | 50.545 | 0      |
| LOC647158 | 0.98   | 0      |
| LOC647162 | 15.87  | 0      |
| LOC647163 | 0.66   | 0.9    |
| LOC647166 | 1.461  | 0      |



|           |        |        |
|-----------|--------|--------|
| LOC647167 | 1.376  | 4.17   |
| LOC647169 | 0.651  | 0      |
| LOC647174 | 1.964  | 0      |
| LOC647175 | 23.089 | 0      |
| LOC647176 | 0.495  | 0      |
| LOC647177 | 18.331 | 0.02   |
| LOC647187 | 47.235 | 0      |
| LOC647188 | 0.18   | 0      |
| LOC647189 | 1.525  | 0      |
| LOC647190 | 3.564  | 0.17   |
| LOC647194 | 0.627  | 0      |
| LOC647195 | 0.74   | 0.67   |
| LOC647201 | 3.757  | 0.03   |
| LOC647202 | 4.166  | 0.97   |
| LOC647203 | 1.166  | 0      |
| LOC647204 | 0.225  | 0      |
| LOC647208 | 20.455 | 0.01   |
| LOC647209 | 3.433  | 0      |
| LOC647211 | 48.559 | 0.01   |
| LOC647212 | 1.006  | 0.1    |
| LOC647215 | 1.794  | 0      |
| LOC647216 | 0.741  | 0      |
| LOC647217 | 1.604  | 1.91   |
| LOC647224 | 47.641 | 0      |
| LOC647238 | 0.402  | 0      |
| LOC647239 | 0.495  | 0.2    |
| LOC647243 | 0.507  | 2.92   |
| LOC647244 | 0.276  | 2.51   |
| LOC647247 | 0.192  | 1.03   |
| LOC647249 | 30.025 | 0      |
| LOC647250 | 0.594  | 0      |
| LOC647252 | 0.683  | 0      |
| LOC647253 | 2.265  | 0.13   |
| LOC647259 | 1.135  | 0      |
| LOC647262 | 0.306  | 0      |
| LOC647264 | 1.316  | 0      |
| LOC647265 | 15.037 | 0      |
| LOC647275 | 0.249  | 0      |
| LOC647276 | 1.46   | 300.75 |
| LOC647277 | 1.146  | 0.17   |
| LOC647278 | 0.222  | 0      |
| LOC647279 | 0.558  | 0      |
| LOC647280 | 14.699 | 0      |
| LOC647281 | 0.493  | 0      |
| LOC647285 | 0.468  | 2.12   |
| LOC647286 | 1.201  | 0      |
| LOC647288 | 2.672  | 0      |
| LOC647291 | 1.898  | 0      |
| LOC647298 | 3.892  | 0      |
| LOC647299 | 18.243 | 0.07   |

|           |        |       |
|-----------|--------|-------|
| LOC647302 | 0.31   | 13.09 |
| LOC647305 | 2.615  | 2.58  |
| LOC647307 | 1.342  | 7.89  |
| LOC647309 | 1.281  | 0     |
| LOC647310 | 0.556  | 0.89  |
| LOC647313 | 0.733  | 0     |
| LOC647315 | 0.543  | 0     |
| LOC647317 | 1.014  | 2.15  |
| LOC647319 | 7.122  | 0.51  |
| LOC647415 | 43.552 | 0.02  |
| LOC647500 | 1.28   | 0.31  |
| LOC647503 | 0.386  | 1.54  |
| LOC647507 | 1.119  | 0     |
| LOC647509 | 0.691  | 0     |
| LOC647520 | 1.491  | 0     |
| LOC647532 | 3.892  | 0.03  |
| LOC647540 | 3.334  | 0     |
| LOC647569 | 3.75   | 0     |
| LOC647678 | 1.782  | 0.05  |
| LOC647757 | 1.158  | 0     |
| LOC647942 | 0.81   | 0.12  |
| LOC648044 | 0.216  | 0     |
| LOC648149 | 2.989  | 0     |
| LOC648154 | 1.638  | 4.11  |
| LOC648217 | 0.771  | 89.7  |
| LOC648230 | 0.378  | 0     |
| LOC648237 | 12.591 | 0.02  |
| LOC648245 | 0.925  | 8.77  |
| LOC648282 | 1.494  | 0.13  |
| LOC648283 | 24.42  | 0.02  |
| LOC648294 | 0.471  | 3.57  |
| LOC648359 | 1.416  | 0.14  |
| LOC648415 | 0.303  | 0     |
| LOC648442 | 0.88   | 2.25  |
| LOC648532 | 0.86   | 0     |
| LOC648570 | 1.858  | 0     |
| LOC648603 | 0.651  | 4.86  |
| LOC648665 | 0.609  | 0     |
| LOC648708 | 8.828  | 0.07  |
| LOC648729 | 0.396  | 88.44 |
| LOC648774 | 3.685  | 0     |
| LOC648846 | 0.564  | 0     |
| LOC648890 | 8.558  | 0     |
| LOC648926 | 2.054  | 0     |
| LOC648927 | 0.987  | 5.71  |
| LOC648937 | 18.627 | 0.04  |
| LOC648947 | 14.479 | 0     |
| LOC648980 | 0.491  | 0     |
| LOC648987 | 3.595  | 1.46  |
| LOC649024 | 30.798 | 0.05  |

|           |         |      |
|-----------|---------|------|
| LOC649095 | 3.498   | 1.69 |
| LOC649137 | 1.077   | 0    |
| LOC649159 | 1.542   | 4.3  |
| LOC649166 | 8.6     | 0    |
| LOC649186 | 0.603   | 0    |
| LOC649198 | 19.423  | 0.02 |
| LOC649201 | 1.818   | 0    |
| LOC649203 | 0.243   | 0    |
| LOC649238 | 1.389   | 0    |
| LOC649259 | 0.864   | 0    |
| LOC649264 | 0.984   | 0    |
| LOC649288 | 0.294   | 0    |
| LOC649290 | 0.606   | 0    |
| LOC649294 | 1.206   | 0    |
| LOC649307 | 4.321   | 0    |
| LOC649324 | 3.233   | 0    |
| LOC649346 | 1.214   | 0    |
| LOC649352 | 1.593   | 0    |
| LOC649458 | 0.66    | 0    |
| LOC649553 | 24.662  | 0.65 |
| LOC649618 | 1.137   | 0    |
| LOC649671 | 0.603   | 0.66 |
| LOC649704 | 8.585   | 0.01 |
| LOC649798 | 1.557   | 0.12 |
| LOC649839 | 0.389   | 0.51 |
| LOC649853 | 0.33    | 0    |
| LOC649925 | 0.82    | 0    |
| LOC649946 | 0.641   | 3.09 |
| LOC650024 | 0.675   | 0    |
| LOC650031 | 0.495   | 0.4  |
| LOC650059 | 0.483   | 0.61 |
| LOC650083 | 0.714   | 0.42 |
| LOC650095 | 0.996   | 1.39 |
| LOC650157 | 17.418  | 0.01 |
| LOC650218 | 7.452   | 0.38 |
| LOC650226 | 161.234 | 0.02 |
| LOC650236 | 7.825   | 0    |
| LOC650340 | 0.786   | 0.37 |
| LOC650346 | 2.784   | 0    |
| LOC650363 | 0.867   | 0    |
| LOC650474 | 2.417   | 0    |
| LOC650531 | 11.127  | 0.08 |
| LOC650560 | 2.43    | 5.7  |
| LOC650561 | 2.004   | 0.05 |
| LOC650609 | 5.072   | 0    |
| LOC650612 | 0.528   | 0    |
| LOC650623 | 58.186  | 0.01 |
| LOC650655 | 43.616  | 0    |
| LOC650666 | 83.47   | 1.18 |
| LOC650708 | 0.813   | 0    |

|           |        |       |
|-----------|--------|-------|
| LOC650747 | 21.384 | 0.02  |
| LOC650767 | 2.296  | 0     |
| LOC650776 | 0.486  | 0.61  |
| LOC650789 | 11.937 | 0.01  |
| LOC650794 | 1.361  | 0.29  |
| LOC650823 | 1.356  | 0     |
| LOC650866 | 1.1    | 0     |
| LOC650901 | 1.123  | 0.26  |
| LOC650947 | 0.918  | 0.44  |
| LOC650951 | 0.475  | 0     |
| LOC651033 | 1.2    | 0     |
| LOC651042 | 45.866 | 0     |
| LOC651053 | 1.987  | 0     |
| LOC651091 | 0.726  | 0.13  |
| LOC651118 | 9.014  | 0.02  |
| LOC651141 | 0.147  | 0     |
| LOC651144 | 15.992 | 1.52  |
| LOC651158 | 0.453  | 0     |
| LOC651200 | 4.719  | 0     |
| LOC651258 | 5.636  | 0     |
| LOC651386 | 0.951  | 0     |
| LOC651419 | 43.729 | 0.01  |
| LOC651628 | 1.288  | 0.84  |
| LOC651644 | 0.92   | 0.11  |
| LOC651746 | 11.93  | 17.7  |
| LOC651868 | 0.392  | 0     |
| LOC651986 | 1.164  | 0     |
| LOC652170 | 1.727  | 0     |
| LOC652276 | 11.52  | 0.31  |
| LOC652419 | 2.858  | 0     |
| LOC652423 | 0.838  | 0     |
| LOC652489 | 0.786  | 0.12  |
| LOC652525 | 9.463  | 0.01  |
| LOC652549 | 5.937  | 1.77  |
| LOC652624 | 2.593  | 0     |
| LOC652670 | 1.032  | 0     |
| LOC652904 | 0.24   | 0     |
| LOC652959 | 0.812  | 0.85  |
| LOC652963 | 0.898  | 48.37 |
| LOC652964 | 0.873  | 0.57  |
| LOC652968 | 1.508  | 0.46  |
| LOC653040 | 1.74   | 0     |
| LOC653042 | 4.124  | 0     |
| LOC653050 | 4.185  | 0     |
| LOC653051 | 1.124  | 0     |
| LOC653052 | 1.086  | 6.11  |
| LOC653053 | 1.317  | 0     |
| LOC653056 | 7.242  | 0.11  |
| LOC653061 | 12.617 | 0     |
| LOC653069 | 0.623  | 0     |

|           |        |       |
|-----------|--------|-------|
| LOC653073 | 1.906  | 0.05  |
| LOC653075 | 14.444 | 0     |
| LOC653079 | 0.591  | 0.17  |
| LOC653080 | 3.495  | 0     |
| LOC653089 | 1.975  | 0     |
| LOC653097 | 0.578  | 0     |
| LOC653103 | 1.572  | 13.34 |
| LOC653104 | 1.059  | 0     |
| LOC653107 | 2.042  | 0     |
| LOC653108 | 3.054  | 0     |
| LOC653110 | 1.901  | 0     |
| LOC653111 | 2.163  | 0     |
| LOC653113 | 15.07  | 0.02  |
| LOC653114 | 1.652  | 0     |
| LOC653115 | 1.19   | 9.98  |
| LOC653117 | 2.229  | 0     |
| LOC653122 | 2.176  | 4     |
| LOC653123 | 0.372  | 0     |
| LOC653125 | 1.9    | 0     |
| LOC653135 | 3.219  | 0     |
| LOC653137 | 1.747  | 0     |
| LOC653146 | 0.231  | 0     |
| LOC653151 | 0.928  | 0     |
| LOC653155 | 0.321  | 9.25  |
| LOC653156 | 1.068  | 0.37  |
| LOC653160 | 2.3    | 1.8   |
| LOC653162 | 0.336  | 0     |
| LOC653163 | 0.225  | 0     |
| LOC653166 | 1.395  | 0     |
| LOC653174 | 3.99   | 0     |
| LOC653175 | 3.612  | 0.52  |
| LOC653185 | 1.858  | 0     |
| LOC653186 | 0.478  | 0.41  |
| LOC653188 | 60.253 | 0     |
| LOC653190 | 29.834 | 0     |
| LOC653192 | 1.674  | 0     |
| LOC653194 | 0.985  | 0     |
| LOC653198 | 0.66   | 2.1   |
| LOC653199 | 4.482  | 3.2   |
| LOC653203 | 0.542  | 0     |
| LOC653214 | 0.787  | 66.13 |
| LOC653232 | 0.749  | 97.36 |
| LOC653240 | 1.18   | 0     |
| LOC653245 | 0.444  | 0     |
| LOC653252 | 0.925  | 1.6   |
| LOC653256 | 3.571  | 0     |
| LOC653264 | 3.22   | 0     |
| LOC653265 | 0.396  | 0     |
| LOC653269 | 3.989  | 0     |
| LOC653270 | 1.748  | 0     |

|           |        |        |
|-----------|--------|--------|
| LOC653275 | 2.067  | 0      |
| LOC653276 | 0.639  | 1.24   |
| LOC653288 | 2.795  | 0      |
| LOC653303 | 1.49   | 1.59   |
| LOC653305 | 0.444  | 0      |
| LOC653314 | 0.905  | 636.92 |
| LOC653316 | 4.41   | 0      |
| LOC653322 | 2.369  | 7.26   |
| LOC653325 | 1.297  | 0.84   |
| LOC653333 | 1.268  | 0      |
| LOC653340 | 3.331  | 5.41   |
| LOC653348 | 1.983  | 0      |
| LOC653354 | 0.594  | 1      |
| LOC653355 | 20.635 | 0      |
| LOC653363 | 1.469  | 0      |
| LOC653364 | 0.585  | 28.58  |
| LOC653375 | 1.608  | 1.17   |
| LOC653380 | 7.136  | 0      |
| LOC653381 | 43.454 | 0.07   |
| LOC653382 | 2.112  | 0      |
| LOC653383 | 0.411  | 0      |
| LOC653390 | 39.941 | 0.15   |
| LOC653406 | 3.035  | 0      |
| LOC653414 | 11.865 | 0      |
| LOC653419 | 1.858  | 0      |
| LOC653420 | 1.877  | 0      |
| LOC653427 | 3.109  | 0      |
| LOC653428 | 1.611  | 0.06   |
| LOC653435 | 22.888 | 0.08   |
| LOC653436 | 47.597 | 0.01   |
| LOC653437 | 1.084  | 0      |
| LOC653441 | 5.386  | 6.85   |
| LOC653449 | 1.003  | 0      |
| LOC653450 | 1.527  | 1.62   |
| LOC653453 | 62.961 | 0      |
| LOC653458 | 0.502  | 0      |
| LOC653464 | 6.32   | 3.77   |
| LOC653479 | 38.233 | 0.42   |
| LOC653483 | 1.067  | 0.19   |
| LOC653486 | 0.436  | 0      |
| LOC653491 | 0.555  | 0      |
| LOC653492 | 22.267 | 0      |
| LOC653498 | 2.055  | 0      |
| LOC653501 | 24.631 | 0      |
| LOC653503 | 1.075  | 6.26   |
| LOC653505 | 3.854  | 0      |
| LOC653506 | 1.054  | 0      |
| LOC653510 | 35.959 | 0.01   |
| LOC653511 | 1.301  | 0.15   |
| LOC653513 | 1.196  | 0.08   |

|           |        |        |
|-----------|--------|--------|
| LOC653519 | 3.972  | 0.65   |
| LOC653520 | 0.901  | 0      |
| LOC653541 | 0.972  | 0      |
| LOC653543 | 2.669  | 0      |
| LOC653544 | 2.665  | 0      |
| LOC653545 | 2.665  | 0      |
| LOC653548 | 2.665  | 0      |
| LOC653550 | 0.662  | 0      |
| LOC653553 | 24.903 | 0.12   |
| LOC653557 | 22.058 | 0.08   |
| LOC653560 | 0.771  | 0      |
| LOC653562 | 11.293 | 0.01   |
| LOC653566 | 1.96   | 9.13   |
| LOC653567 | 3.035  | 13.24  |
| LOC653583 | 1.342  | 0.52   |
| LOC653588 | 1.024  | 0.58   |
| LOC653590 | 7.156  | 0      |
| LOC653593 | 0.381  | 0      |
| LOC653598 | 3.854  | 0      |
| LOC653606 | 2.124  | 0      |
| LOC653629 | 1.014  | 0.1    |
| LOC653630 | 0.643  | 0      |
| LOC653631 | 2.171  | 2.05   |
| LOC653635 | 24.608 | 0.38   |
| LOC653641 | 3.451  | 0      |
| LOC653643 | 3.455  | 0.14   |
| LOC653653 | 1.494  | 1.26   |
| LOC653656 | 0.777  | 0      |
| LOC653657 | 0.777  | 0      |
| LOC653658 | 0.462  | 586.12 |
| LOC653665 | 0.571  | 0.17   |
| LOC653677 | 1.396  | 0.28   |
| LOC653690 | 0.27   | 0      |
| LOC653695 | 0.222  | 0      |
| LOC653698 | 2.087  | 0.85   |
| LOC653707 | 96.582 | 0      |
| LOC653712 | 0.701  | 0.43   |
| LOC653720 | 1.899  | 0.05   |
| LOC653735 | 0.366  | 0      |
| LOC653737 | 0.604  | 0.66   |
| LOC653740 | 0.21   | 5.65   |
| LOC653748 | 0.642  | 0      |
| LOC653753 | 1.059  | 0      |
| LOC653758 | 0.881  | 1.91   |
| LOC653768 | 1.703  | 0      |
| LOC653769 | 57.612 | 0      |
| LOC653772 | 49.242 | 0      |
| LOC653773 | 0.378  | 7.07   |
| LOC653775 | 3.498  | 0      |
| LOC653781 | 3.826  | 0      |

|           |        |       |
|-----------|--------|-------|
| LOC653786 | 40.773 | 0.04  |
| LOC653789 | 0.366  | 0     |
| LOC653794 | 16.008 | 0.01  |
| LOC653796 | 1.645  | 21.47 |
| LOC653800 | 6.432  | 0     |
| LOC653801 | 0.982  | 0.91  |
| LOC653808 | 1.934  | 0     |
| LOC653809 | 1.657  | 0     |
| LOC653820 | 6.851  | 0.01  |
| LOC653841 | 0.555  | 0     |
| LOC653852 | 0.921  | 0     |
| LOC653895 | 0.171  | 0     |
| LOC654029 | 0.696  | 1.42  |
| LOC654089 | 0.138  | 0     |
| LOC654106 | 0.888  | 0     |
| LOC654119 | 0.252  | 0     |
| LOC654254 | 48.426 | 0.03  |
| LOC654337 | 0.119  | 0     |
| LOC654338 | 0.121  | 0     |
| LOC654340 | 1.761  | 3.09  |
| LOC654342 | 0.89   | 0     |
| LOC654346 | 1.688  | 0.12  |
| LOC654350 | 0.797  | 1.37  |
| LOC654480 | 0.627  | 32.98 |
| LOC654484 | 0.386  | 0.77  |
| LOC654485 | 0.39   | 0.51  |
| LOC654486 | 0.423  | 0.23  |
| LOC654487 | 1.374  | 1.23  |
| LOC654780 | 2.689  | 0     |
| LOC677762 | 1.033  | 8.24  |
| LOC723972 | 0.738  | 13.54 |
| LOC727721 | 0.545  | 0     |
| LOC727722 | 1.713  | 0.06  |
| LOC727723 | 0.558  | 0     |
| LOC727724 | 1.114  | 0     |
| LOC727725 | 1.907  | 35.59 |
| LOC727726 | 2.542  | 0.78  |
| LOC727727 | 0.839  | 0.12  |
| LOC727728 | 1.097  | 2.61  |
| LOC727729 | 0.837  | 0     |
| LOC727730 | 0.377  | 0     |
| LOC727731 | 0.724  | 0     |
| LOC727732 | 4.915  | 0     |
| LOC727733 | 1.114  | 0     |
| LOC727735 | 9.125  | 0.05  |
| LOC727736 | 1.993  | 0.6   |
| LOC727737 | 8.586  | 0     |
| LOC727738 | 1.241  | 1.44  |
| LOC727739 | 0.586  | 0     |
| LOC727741 | 6.409  | 1.08  |



|           |       |       |
|-----------|-------|-------|
| LOC727742 | 2.609 | 0.12  |
| LOC727743 | 0.714 | 0.69  |
| LOC727744 | 0.315 | 0     |
| LOC727745 | 0.576 | 0     |
| LOC727746 | 3.954 | 0     |
| LOC727747 | 0.806 | 0     |
| LOC727748 | 3.552 | 0     |
| LOC727749 | 0.93  | 0     |
| LOC727750 | 0.726 | 0     |
| LOC727751 | 0.941 | 0     |
| LOC727752 | 1.294 | 0     |
| LOC727753 | 5.119 | 0     |
| LOC727754 | 1.824 | 0     |
| LOC727755 | 2.191 | 0     |
| LOC727756 | 1.076 | 0     |
| LOC727758 | 1.319 | 17.48 |
| LOC727759 | 2.167 | 0.04  |
| LOC727761 | 1.507 | 0     |
| LOC727762 | 1.978 | 0     |
| LOC727764 | 1.979 | 0     |
| LOC727767 | 1.222 | 0     |
| LOC727768 | 1.642 | 0     |
| LOC727769 | 0.495 | 0.2   |
| LOC727770 | 33.17 | 0     |
| LOC727771 | 0.54  | 0     |
| LOC727773 | 5.464 | 0     |
| LOC727775 | 2.39  | 0     |
| LOC727776 | 1.362 | 0.29  |
| LOC727777 | 0.78  | 0.51  |
| LOC727778 | 7.873 | 0     |
| LOC727779 | 0.509 | 0     |
| LOC727780 | 0.575 | 0     |
| LOC727781 | 3.282 | 0     |
| LOC727784 | 1.222 | 0     |
| LOC727785 | 0.708 | 0     |
| LOC727786 | 0.716 | 0     |
| LOC727787 | 0.996 | 0     |
| LOC727788 | 3.331 | 0     |
| LOC727789 | 0.893 | 2.66  |
| LOC727791 | 2.928 | 0     |
| LOC727792 | 0.162 | 8.55  |
| LOC727793 | 1.416 | 0.14  |
| LOC727794 | 0.597 | 0     |
| LOC727795 | 1.227 | 0.24  |
| LOC727796 | 0.393 | 1.26  |
| LOC727797 | 3.661 | 0     |
| LOC727798 | 0.537 | 0     |
| LOC727799 | 0.978 | 0.2   |
| LOC727801 | 0.708 | 0     |
| LOC727802 | 0.738 | 1.47  |

|           |        |         |
|-----------|--------|---------|
| LOC727803 | 0.898  | 0.44    |
| LOC727804 | 2.06   | 2.36    |
| LOC727805 | 11.086 | 0.07    |
| LOC727806 | 32.835 | 0       |
| LOC727807 | 4.868  | 0       |
| LOC727808 | 1.479  | 0       |
| LOC727809 | 1.765  | 0.22    |
| LOC727810 | 0.47   | 1.05    |
| LOC727811 | 3.028  | 0       |
| LOC727812 | 0.567  | 0       |
| LOC727813 | 0.444  | 0       |
| LOC727814 | 0.432  | 0       |
| LOC727815 | 2.406  | 1.69    |
| LOC727816 | 0.735  | 10.1    |
| LOC727817 | 0.453  | 0       |
| LOC727818 | 4.506  | 0       |
| LOC727819 | 0.317  | 0       |
| LOC727820 | 8.16   | 0.37    |
| LOC727821 | 0.559  | 0.71    |
| LOC727822 | 0.84   | 0       |
| LOC727823 | 0.27   | 0       |
| LOC727824 | 1.221  | 0       |
| LOC727825 | 6.328  | 0       |
| LOC727826 | 0.565  | 1653.21 |
| LOC727827 | 0.791  | 0.5     |
| LOC727828 | 6.773  | 0       |
| LOC727829 | 0.636  | 0.16    |
| LOC727830 | 4.197  | 0       |
| LOC727831 | 0.637  | 3.73    |
| LOC727832 | 3.703  | 0       |
| LOC727833 | 1.527  | 0.26    |
| LOC727834 | 6.697  | 0       |
| LOC727835 | 0.788  | 0.12    |
| LOC727836 | 1.603  | 0       |
| LOC727837 | 1.344  | 0       |
| LOC727838 | 0.855  | 0       |
| LOC727839 | 4.151  | 0.48    |
| LOC727840 | 0.576  | 0       |
| LOC727841 | 0.831  | 0       |
| LOC727842 | 1.307  | 1.66    |
| LOC727843 | 1.72   | 7.76    |
| LOC727844 | 0.49   | 0       |
| LOC727845 | 0.258  | 0       |
| LOC727846 | 1.328  | 0.07    |
| LOC727847 | 0.522  | 0       |
| LOC727848 | 1.236  | 0       |
| LOC727849 | 0.941  | 0       |
| LOC727852 | 1.928  | 0.61    |
| LOC727853 | 0.825  | 0       |
| LOC727854 | 0.189  | 0       |

|           |        |      |
|-----------|--------|------|
| LOC727855 | 9.61   | 0    |
| LOC727856 | 1.64   | 0    |
| LOC727857 | 1.872  | 0    |
| LOC727858 | 4.166  | 0    |
| LOC727859 | 20.612 | 0    |
| LOC727860 | 0.549  | 0    |
| LOC727861 | 1.515  | 0    |
| LOC727862 | 0.524  | 0    |
| LOC727863 | 0.852  | 0    |
| LOC727864 | 0.879  | 0    |
| LOC727865 | 0.711  | 1.39 |
| LOC727866 | 3.398  | 7.95 |
| LOC727867 | 1.155  | 0    |
| LOC727868 | 27.16  | 0    |
| LOC727869 | 1.117  | 8.77 |
| LOC727870 | 0.548  | 0    |
| LOC727872 | 1.438  | 1.37 |
| LOC727873 | 0.567  | 0    |
| LOC727874 | 0.567  | 2.1  |
| LOC727875 | 0.879  | 0    |
| LOC727877 | 4.131  | 0    |
| LOC727878 | 0.47   | 0    |
| LOC727879 | 0.449  | 0    |
| LOC727880 | 3.938  | 0    |
| LOC727881 | 0.426  | 0    |
| LOC727882 | 9.944  | 0    |
| LOC727883 | 0.306  | 0    |
| LOC727884 | 1.729  | 2.69 |
| LOC727885 | 0.573  | 0    |
| LOC727886 | 0.555  | 0    |
| LOC727887 | 1.675  | 0.06 |
| LOC727888 | 13.231 | 0    |
| LOC727889 | 0.372  | 0    |
| LOC727890 | 1.8    | 0    |
| LOC727891 | 27.479 | 0.07 |
| LOC727892 | 0.879  | 0    |
| LOC727893 | 3.033  | 0    |
| LOC727894 | 0.312  | 0    |
| LOC727895 | 0.709  | 0.7  |
| LOC727896 | 2.697  | 0.81 |
| LOC727898 | 1.185  | 0    |
| LOC727899 | 0.554  | 0    |
| LOC727900 | 2.284  | 9.53 |
| LOC727901 | 17.065 | 0    |
| LOC727902 | 0.288  | 0    |
| LOC727903 | 0.687  | 1.3  |
| LOC727904 | 0.33   | 0.6  |
| LOC727905 | 3.621  | 0    |
| LOC727906 | 0.369  | 0    |
| LOC727907 | 0.879  | 0    |

|           |        |       |
|-----------|--------|-------|
| LOC727908 | 2.76   | 0     |
| LOC727909 | 5.11   | 0.02  |
| LOC727910 | 1.335  | 0.07  |
| LOC727911 | 0.426  | 0     |
| LOC727912 | 1.032  | 0     |
| LOC727913 | 0.402  | 0.49  |
| LOC727914 | 14.509 | 0.07  |
| LOC727915 | 0.478  | 0     |
| LOC727916 | 2      | 0.15  |
| LOC727917 | 0.879  | 0     |
| LOC727918 | 2.428  | 6.08  |
| LOC727920 | 0.559  | 0.18  |
| LOC727921 | 3.386  | 0.88  |
| LOC727922 | 23.002 | 0     |
| LOC727923 | 0.598  | 2.98  |
| LOC727924 | 0.554  | 0     |
| LOC727926 | 0.958  | 21.58 |
| LOC727927 | 4.124  | 0     |
| LOC727928 | 2.207  | 0.18  |
| LOC727929 | 0.765  | 7.63  |
| LOC727930 | 40.769 | 0.02  |
| LOC727931 | 0.237  | 3.76  |
| LOC727932 | 0.879  | 0     |
| LOC727933 | 0.564  | 0     |
| LOC727934 | 1.759  | 0.39  |
| LOC727935 | 0.593  | 0     |
| LOC727936 | 1.547  | 0     |
| LOC727937 | 0.615  | 0.48  |
| LOC727938 | 1.814  | 0.55  |
| LOC727939 | 0.84   | 0.24  |
| LOC727940 | 1.309  | 0     |
| LOC727941 | 66.426 | 0     |
| LOC727942 | 5.773  | 0     |
| LOC727943 | 1.296  | 0     |
| LOC727944 | 0.713  | 0     |
| LOC727945 | 1.684  | 0.06  |
| LOC727946 | 0.879  | 0     |
| LOC727947 | 0.394  | 4.02  |
| LOC727948 | 2.603  | 0     |
| LOC727949 | 0.6    | 0.17  |
| LOC727950 | 2.13   | 0     |
| LOC727951 | 1.662  | 0     |
| LOC727952 | 0.879  | 0     |
| LOC727953 | 0.362  | 0     |
| LOC727954 | 0.639  | 0     |
| LOC727955 | 0.486  | 0     |
| LOC727957 | 5.308  | 1.79  |
| LOC727958 | 0.258  | 0     |
| LOC727959 | 0.756  | 0     |
| LOC727960 | 1.852  | 0     |

|           |        |      |
|-----------|--------|------|
| LOC727962 | 22.156 | 0    |
| LOC727963 | 69.624 | 0.01 |
| LOC727964 | 5.007  | 0    |
| LOC727965 | 0.843  | 0    |
| LOC727966 | 1.815  | 0    |
| LOC727967 | 2.05   | 2.36 |
| LOC727968 | 0.879  | 0    |
| LOC727969 | 0.501  | 0    |
| LOC727970 | 1.029  | 0.1  |
| LOC727971 | 0.833  | 0.36 |
| LOC727972 | 1.122  | 0    |
| LOC727973 | 1.06   | 0    |
| LOC727974 | 0.978  | 0    |
| LOC727975 | 0.459  | 0    |
| LOC727976 | 0.429  | 0    |
| LOC727977 | 1.163  | 0.43 |
| LOC727978 | 1.653  | 2.99 |
| LOC727979 | 0.879  | 0    |
| LOC727980 | 1.566  | 0    |
| LOC727981 | 0.54   | 0.36 |
| LOC727982 | 0.507  | 0    |
| LOC727983 | 2.46   | 0    |
| LOC727984 | 0.591  | 0.67 |
| LOC727985 | 1.061  | 0    |
| LOC727986 | 0.375  | 0    |
| LOC727987 | 10.621 | 0    |
| LOC727988 | 0.843  | 1.29 |
| LOC727989 | 0.579  | 0    |
| LOC727990 | 0.879  | 0    |
| LOC727991 | 1.372  | 0.21 |
| LOC727992 | 0.348  | 0    |
| LOC727993 | 0.526  | 0    |
| LOC727994 | 0.39   | 0    |
| LOC727995 | 0.891  | 0    |
| LOC727996 | 1.627  | 0    |
| LOC727997 | 0.423  | 1.17 |
| LOC727998 | 0.474  | 0    |
| LOC727999 | 0.545  | 0    |
| LOC728000 | 0.615  | 0    |
| LOC728001 | 0.879  | 0    |
| LOC728002 | 0.574  | 3.62 |
| LOC728003 | 12.838 | 1.84 |
| LOC728004 | 2.13   | 0    |
| LOC728006 | 1.072  | 1.29 |
| LOC728007 | 1.039  | 0.1  |
| LOC728008 | 1.419  | 1.54 |
| LOC728009 | 0.541  | 4.03 |
| LOC728010 | 0.607  | 0.33 |
| LOC728011 | 1.827  | 0.11 |
| LOC728012 | 1.069  | 0    |

|           |        |       |
|-----------|--------|-------|
| LOC728013 | 0.842  | 0     |
| LOC728014 | 1.141  | 18.56 |
| LOC728015 | 1.37   | 0.14  |
| LOC728016 | 0.345  | 0     |
| LOC728017 | 0.476  | 0.84  |
| LOC728018 | 0.691  | 0.14  |
| LOC728019 | 1.007  | 0.59  |
| LOC728020 | 2.085  | 0.1   |
| LOC728021 | 1.542  | 1.16  |
| LOC728022 | 2.682  | 0     |
| LOC728023 | 0.387  | 7.42  |
| LOC728025 | 1.12   | 1.86  |
| LOC728026 | 0.33   | 0.3   |
| LOC728027 | 26.814 | 0     |
| LOC728028 | 10.768 | 0     |
| LOC728029 | 0.534  | 0     |
| LOC728030 | 1.113  | 0.62  |
| LOC728031 | 1.082  | 1.46  |
| LOC728033 | 0.588  | 0     |
| LOC728034 | 0.502  | 0     |
| LOC728035 | 0.593  | 0     |
| LOC728037 | 16.833 | 0     |
| LOC728038 | 0.525  | 0     |
| LOC728041 | 6.221  | 0.44  |
| LOC728043 | 0.219  | 0     |
| LOC728044 | 42.489 | 0.04  |
| LOC728045 | 0.387  | 0     |
| LOC728046 | 2.243  | 1.68  |
| LOC728047 | 5.478  | 0.02  |
| LOC728048 | 0.566  | 1.05  |
| LOC728050 | 0.351  | 0     |
| LOC728051 | 1.503  | 3.03  |
| LOC728052 | 0.863  | 0.57  |
| LOC728053 | 13.019 | 0.04  |
| LOC728054 | 1.99   | 0     |
| LOC728055 | 2.107  | 0.8   |
| LOC728056 | 2.735  | 0     |
| LOC728057 | 1.012  | 0     |
| LOC728058 | 1.366  | 1.01  |
| LOC728059 | 1.056  | 2.35  |
| LOC728060 | 1.005  | 2.76  |
| LOC728063 | 0.66   | 0     |
| LOC728064 | 78.345 | 0     |
| LOC728065 | 0.908  | 0     |
| LOC728066 | 1.992  | 0.79  |
| LOC728067 | 0.705  | 0     |
| LOC728068 | 1.215  | 0     |
| LOC728069 | 2.334  | 2.46  |
| LOC728071 | 2.405  | 0.45  |
| LOC728073 | 1.694  | 0     |

|           |        |       |
|-----------|--------|-------|
| LOC728074 | 0.903  | 0     |
| LOC728076 | 0.46   | 0     |
| LOC728077 | 0.723  | 0.28  |
| LOC728078 | 0.477  | 0     |
| LOC728079 | 0.819  | 0.12  |
| LOC728080 | 4.893  | 0.02  |
| LOC728083 | 1.898  | 1.98  |
| LOC728085 | 0.402  | 0     |
| LOC728086 | 0.416  | 0     |
| LOC728087 | 0.345  | 0     |
| LOC728088 | 0.65   | 3.2   |
| LOC728089 | 0.563  | 0     |
| LOC728091 | 0.585  | 0     |
| LOC728092 | 1.224  | 0     |
| LOC728093 | 3.598  | 0     |
| LOC728094 | 0.993  | 0     |
| LOC728095 | 0.548  | 0     |
| LOC728097 | 0.618  | 0     |
| LOC728098 | 12.475 | 1     |
| LOC728099 | 3.809  | 0.13  |
| LOC728100 | 3.609  | 0     |
| LOC728101 | 1.443  | 0.14  |
| LOC728102 | 1.878  | 0.74  |
| LOC728103 | 1.097  | 0     |
| LOC728104 | 0.754  | 0.39  |
| LOC728105 | 3.332  | 0.3   |
| LOC728106 | 0.716  | 0.28  |
| LOC728107 | 1.044  | 0.19  |
| LOC728108 | 0.342  | 6.08  |
| LOC728109 | 0.45   | 0     |
| LOC728110 | 1.606  | 6.53  |
| LOC728112 | 0.585  | 5.08  |
| LOC728113 | 2.036  | 0     |
| LOC728114 | 0.965  | 0     |
| LOC728115 | 0.942  | 3.99  |
| LOC728117 | 1.956  | 0     |
| LOC728118 | 4.872  | 0.04  |
| LOC728119 | 2.268  | 0     |
| LOC728120 | 0.66   | 0     |
| LOC728121 | 20.094 | 0     |
| LOC728122 | 0.362  | 0     |
| LOC728123 | 0.838  | 0     |
| LOC728124 | 0.726  | 0     |
| LOC728125 | 0.39   | 0     |
| LOC728126 | 8.963  | 0.09  |
| LOC728128 | 0.891  | 0.77  |
| LOC728129 | 0.878  | 0.12  |
| LOC728130 | 4.871  | 0.12  |
| LOC728131 | 1.493  | 43.01 |
| LOC728132 | 1.178  | 0     |

|           |        |      |
|-----------|--------|------|
| LOC728133 | 0.885  | 0    |
| LOC728134 | 0.52   | 2.47 |
| LOC728135 | 0.969  | 0    |
| LOC728136 | 0.972  | 0    |
| LOC728137 | 1.16   | 0    |
| LOC728138 | 2.619  | 1.17 |
| LOC728139 | 0.899  | 1.65 |
| LOC728140 | 1.566  | 0    |
| LOC728141 | 0.3    | 0    |
| LOC728142 | 0.6    | 0.17 |
| LOC728143 | 0.503  | 0    |
| LOC728144 | 4.835  | 0.04 |
| LOC728145 | 2.944  | 0    |
| LOC728146 | 2.194  | 0    |
| LOC728147 | 2.31   | 0.04 |
| LOC728148 | 0.747  | 0    |
| LOC728149 | 0.643  | 1.69 |
| LOC728150 | 0.632  | 0    |
| LOC728151 | 1.074  | 2.03 |
| LOC728152 | 0.542  | 0    |
| LOC728153 | 2.904  | 0.24 |
| LOC728154 | 0.477  | 0.83 |
| LOC728155 | 1.41   | 0    |
| LOC728156 | 45.677 | 0.02 |
| LOC728157 | 0.45   | 0    |
| LOC728160 | 2.643  | 0    |
| LOC728161 | 0.723  | 0    |
| LOC728162 | 1.47   | 0    |
| LOC728163 | 0.324  | 0.61 |
| LOC728164 | 0.762  | 0.26 |
| LOC728165 | 0.552  | 0    |
| LOC728166 | 0.561  | 0    |
| LOC728167 | 6.194  | 0    |
| LOC728168 | 0.714  | 0    |
| LOC728169 | 0.633  | 0    |
| LOC728170 | 1.336  | 0.37 |
| LOC728171 | 0.637  | 0    |
| LOC728172 | 0.402  | 0.49 |
| LOC728173 | 0.472  | 0    |
| LOC728174 | 0.488  | 0    |
| LOC728175 | 0.572  | 0.35 |
| LOC728176 | 0.835  | 3.8  |
| LOC728177 | 0.756  | 0    |
| LOC728178 | 1.638  | 1.57 |
| LOC728179 | 0.866  | 0.12 |
| LOC728180 | 0.627  | 0    |
| LOC728181 | 0.989  | 0    |
| LOC728182 | 0.582  | 0    |
| LOC728183 | 0.541  | 0    |
| LOC728184 | 1.594  | 0.12 |



|           |         |       |
|-----------|---------|-------|
| LOC728185 | 0.472   | 0     |
| LOC728186 | 2.446   | 0     |
| LOC728187 | 0.607   | 0     |
| LOC728188 | 1.696   | 0     |
| LOC728189 | 0.855   | 0     |
| LOC728190 | 1.061   | 0.74  |
| LOC728191 | 0.61    | 0     |
| LOC728192 | 0.907   | 0     |
| LOC728193 | 0.553   | 0     |
| LOC728194 | 3.106   | 0.06  |
| LOC728195 | 0.333   | 0     |
| LOC728196 | 1.144   | 0     |
| LOC728197 | 0.541   | 0     |
| LOC728198 | 2.689   | 0     |
| LOC728199 | 73.276  | 0     |
| LOC728200 | 0.822   | 0.48  |
| LOC728201 | 0.414   | 0     |
| LOC728203 | 1.426   | 0     |
| LOC728204 | 9.022   | 0     |
| LOC728205 | 0.751   | 0.27  |
| LOC728206 | 635.771 | 0     |
| LOC728207 | 0.497   | 0.6   |
| LOC728208 | 0.586   | 0     |
| LOC728209 | 0.469   | 0     |
| LOC728210 | 0.753   | 1.45  |
| LOC728211 | 1.58    | 0.62  |
| LOC728212 | 1.33    | 0     |
| LOC728213 | 0.568   | 0.18  |
| LOC728214 | 0.636   | 0     |
| LOC728215 | 3.482   | 0.03  |
| LOC728216 | 1.627   | 0     |
| LOC728217 | 0.829   | 1.32  |
| LOC728218 | 0.76    | 0     |
| LOC728219 | 0.767   | 0     |
| LOC728220 | 0.417   | 0     |
| LOC728221 | 1.176   | 0.08  |
| LOC728222 | 0.545   | 0     |
| LOC728224 | 1.548   | 0     |
| LOC728225 | 30.706  | 18.26 |
| LOC728226 | 1.658   | 0     |
| LOC728227 | 1.38    | 0     |
| LOC728229 | 3.448   | 0.11  |
| LOC728230 | 0.453   | 0     |
| LOC728231 | 0.81    | 0     |
| LOC728232 | 0.342   | 0     |
| LOC728233 | 23.854  | 1.63  |
| LOC728234 | 0.261   | 0     |
| LOC728235 | 0.525   | 0     |
| LOC728236 | 0.477   | 0     |
| LOC728237 | 0.735   | 0     |

|           |        |       |
|-----------|--------|-------|
| LOC728238 | 0.872  | 26.89 |
| LOC728240 | 1.134  | 0     |
| LOC728241 | 0.567  | 0     |
| LOC728242 | 0.713  | 0     |
| LOC728243 | 8.561  | 0     |
| LOC728244 | 5.902  | 0.32  |
| LOC728245 | 0.652  | 0     |
| LOC728246 | 0.366  | 0     |
| LOC728247 | 10.671 | 0     |
| LOC728248 | 29.761 | 0     |
| LOC728249 | 1.187  | 0.08  |
| LOC728250 | 0.398  | 0     |
| LOC728251 | 0.435  | 0     |
| LOC728252 | 0.911  | 0.33  |
| LOC728253 | 1.627  | 0     |
| LOC728254 | 3.853  | 0     |
| LOC728255 | 0.366  | 0     |
| LOC728256 | 1.98   | 9.7   |
| LOC728257 | 4.287  | 0.11  |
| LOC728259 | 1.222  | 0     |
| LOC728260 | 0.918  | 0     |
| LOC728261 | 0.966  | 0     |
| LOC728262 | 1.275  | 0     |
| LOC728263 | 32.972 | 0     |
| LOC728264 | 1.35   | 0     |
| LOC728266 | 1.222  | 0     |
| LOC728267 | 0.294  | 0     |
| LOC728268 | 1.626  | 0.12  |
| LOC728269 | 1.826  | 0     |
| LOC728270 | 0.414  | 0     |
| LOC728271 | 4.106  | 0     |
| LOC728272 | 2.033  | 23.55 |
| LOC728273 | 0.645  | 0     |
| LOC728274 | 58.419 | 0     |
| LOC728275 | 1.152  | 0     |
| LOC728276 | 0.411  | 0     |
| LOC728277 | 2.145  | 0.46  |
| LOC728278 | 2.367  | 0     |
| LOC728279 | 0.436  | 0     |
| LOC728280 | 0.615  | 38.61 |
| LOC728281 | 0.516  | 0     |
| LOC728282 | 0.393  | 0     |
| LOC728284 | 0.565  | 0     |
| LOC728285 | 0.875  | 0     |
| LOC728286 | 1.296  | 0.23  |
| LOC728287 | 1.22   | 1.71  |
| LOC728288 | 1.634  | 0     |
| LOC728289 | 0.609  | 0     |
| LOC728290 | 0.449  | 0     |
| LOC728291 | 6.101  | 0.06  |

|           |        |      |
|-----------|--------|------|
| LOC728292 | 0.561  | 0    |
| LOC728295 | 9.46   | 0    |
| LOC728296 | 0.201  | 0    |
| LOC728297 | 0.844  | 0    |
| LOC728298 | 1.317  | 5.64 |
| LOC728300 | 1.834  | 0.05 |
| LOC728301 | 0.451  | 0.22 |
| LOC728302 | 1.365  | 0    |
| LOC728303 | 0.312  | 1.27 |
| LOC728304 | 0.531  | 0    |
| LOC728305 | 0.411  | 0    |
| LOC728306 | 1.05   | 0    |
| LOC728307 | 5.805  | 0    |
| LOC728308 | 0.47   | 10.1 |
| LOC728309 | 1.663  | 0    |
| LOC728310 | 1.461  | 0    |
| LOC728311 | 0.24   | 1.24 |
| LOC728312 | 63.119 | 0    |
| LOC728313 | 0.306  | 0    |
| LOC728314 | 2.421  | 0.94 |
| LOC728315 | 0.797  | 0.75 |
| LOC728316 | 0.591  | 0    |
| LOC728317 | 6.087  | 0    |
| LOC728318 | 0.906  | 0    |
| LOC728319 | 0.942  | 0.11 |
| LOC728320 | 4.192  | 0    |
| LOC728321 | 0.882  | 0.56 |
| LOC728322 | 0.492  | 0    |
| LOC728323 | 43.757 | 0.02 |
| LOC728324 | 0.766  | 1.03 |
| LOC728325 | 0.306  | 0.65 |
| LOC728326 | 0.885  | 0.12 |
| LOC728328 | 1.287  | 0.31 |
| LOC728329 | 0.6    | 0    |
| LOC728330 | 0.216  | 0    |
| LOC728331 | 0.711  | 0    |
| LOC728332 | 1.125  | 0.97 |
| LOC728333 | 1.813  | 0.38 |
| LOC728334 | 2.275  | 0    |
| LOC728335 | 0.909  | 0.65 |
| LOC728336 | 0.477  | 1.66 |
| LOC728337 | 0.345  | 0    |
| LOC728338 | 1.287  | 0    |
| LOC728339 | 1.645  | 0    |
| LOC728340 | 4.645  | 0.02 |
| LOC728341 | 0.51   | 0    |
| LOC728342 | 0.689  | 0    |
| LOC728343 | 4.062  | 0    |
| LOC728344 | 37.346 | 0.07 |
| LOC728345 | 0.51   | 0    |

|           |        |       |
|-----------|--------|-------|
| LOC728346 | 0.797  | 0     |
| LOC728347 | 0.88   | 0     |
| LOC728348 | 0.444  | 0     |
| LOC728349 | 0.702  | 0     |
| LOC728350 | 1.376  | 8.27  |
| LOC728351 | 1.177  | 0     |
| LOC728352 | 3.112  | 0.38  |
| LOC728353 | 0.831  | 0.12  |
| LOC728354 | 0.24   | 0     |
| LOC728355 | 0.444  | 0     |
| LOC728356 | 0.456  | 0     |
| LOC728357 | 0.557  | 0.18  |
| LOC728358 | 0.493  | 3.21  |
| LOC728359 | 0.384  | 0.26  |
| LOC728360 | 0.871  | 0     |
| LOC728361 | 0.84   | 0     |
| LOC728362 | 0.674  | 0     |
| LOC728363 | 0.681  | 3.92  |
| LOC728364 | 4.277  | 0     |
| LOC728365 | 0.171  | 0     |
| LOC728366 | 0.519  | 6.29  |
| LOC728367 | 0.279  | 4.61  |
| LOC728368 | 0.793  | 0.25  |
| LOC728369 | 1.593  | 0     |
| LOC728370 | 0.906  | 0.44  |
| LOC728371 | 13.562 | 0.01  |
| LOC728372 | 0.591  | 0.67  |
| LOC728373 | 1.593  | 0     |
| LOC728374 | 0.635  | 0.62  |
| LOC728375 | 0.591  | 0     |
| LOC728376 | 0.519  | 0     |
| LOC728377 | 5.571  | 0.64  |
| LOC728378 | 3.989  | 0     |
| LOC728379 | 1.593  | 0     |
| LOC728380 | 0.818  | 0.25  |
| LOC728381 | 1.773  | 0.45  |
| LOC728382 | 3.175  | 0     |
| LOC728383 | 0.518  | 0     |
| LOC728384 | 30.377 | 0     |
| LOC728385 | 0.585  | 0     |
| LOC728386 | 1.593  | 0     |
| LOC728387 | 1.119  | 0     |
| LOC728388 | 2.219  | 0     |
| LOC728389 | 0.552  | 14.16 |
| LOC728390 | 0.9    | 0.11  |
| LOC728391 | 1.498  | 4.43  |
| LOC728392 | 4.556  | 5.91  |
| LOC728393 | 1.593  | 0     |
| LOC728394 | 0.375  | 0     |
| LOC728395 | 1.178  | 0     |

|           |        |      |
|-----------|--------|------|
| LOC728396 | 0.234  | 0    |
| LOC728397 | 1.258  | 2.84 |
| LOC728398 | 0.222  | 0    |
| LOC728399 | 0.246  | 0.4  |
| LOC728400 | 1.593  | 0    |
| LOC728401 | 7.009  | 0.26 |
| LOC728402 | 0.74   | 0.27 |
| LOC728403 | 1.16   | 0    |
| LOC728405 | 1.593  | 0    |
| LOC728406 | 1.533  | 0.06 |
| LOC728407 | 1.137  | 0.52 |
| LOC728408 | 1.799  | 0    |
| LOC728410 | 2.672  | 0    |
| LOC728411 | 0.732  | 2.03 |
| LOC728412 | 1.16   | 0    |
| LOC728413 | 1.185  | 0    |
| LOC728414 | 0.972  | 0    |
| LOC728415 | 0.363  | 0    |
| LOC728416 | 0.486  | 0    |
| LOC728417 | 4.459  | 0.07 |
| LOC728418 | 2.46   | 0    |
| LOC728419 | 1.593  | 0    |
| LOC728420 | 0.663  | 0    |
| LOC728421 | 0.39   | 0    |
| LOC728422 | 0.384  | 0    |
| LOC728423 | 54.354 | 0.2  |
| LOC728424 | 5.665  | 0    |
| LOC728425 | 1.275  | 0    |
| LOC728426 | 0.327  | 0    |
| LOC728427 | 0.456  | 0.21 |
| LOC728428 | 0.565  | 6.65 |
| LOC728429 | 3.784  | 0    |
| LOC728430 | 1.395  | 0    |
| LOC728431 | 1.088  | 0    |
| LOC728432 | 0.621  | 0.16 |
| LOC728433 | 0.393  | 0    |
| LOC728435 | 0.681  | 0    |
| LOC728436 | 0.771  | 0    |
| LOC728438 | 1.627  | 0    |
| LOC728439 | 0.963  | 0    |
| LOC728440 | 0.681  | 0    |
| LOC728442 | 1.094  | 0    |
| LOC728443 | 0.643  | 0    |
| LOC728444 | 0.681  | 0    |
| LOC728445 | 1.357  | 0.14 |
| LOC728446 | 1.188  | 0.08 |
| LOC728447 | 1.469  | 0    |
| LOC728448 | 20.546 | 0.15 |
| LOC728449 | 1.901  | 0    |
| LOC728450 | 0.524  | 0    |

|           |        |      |
|-----------|--------|------|
| LOC728451 | 2.004  | 0    |
| LOC728452 | 4.324  | 0    |
| LOC728453 | 0.21   | 0    |
| LOC728454 | 0.336  | 0    |
| LOC728455 | 1.047  | 0    |
| LOC728456 | 0.396  | 5.75 |
| LOC728457 | 0.681  | 0    |
| LOC728459 | 0.452  | 0    |
| LOC728460 | 0.441  | 0    |
| LOC728462 | 12.174 | 0.01 |
| LOC728463 | 2.105  | 0    |
| LOC728464 | 0.798  | 0    |
| LOC728465 | 0.681  | 0    |
| LOC728466 | 0.33   | 0    |
| LOC728467 | 4.263  | 4.57 |
| LOC728468 | 2.277  | 0.09 |
| LOC728469 | 2.708  | 0    |
| LOC728470 | 0.729  | 0    |
| LOC728471 | 0.756  | 0.39 |
| LOC728472 | 0.228  | 0    |
| LOC728473 | 1.246  | 0    |
| LOC728474 | 1.542  | 0    |
| LOC728475 | 0.426  | 0    |
| LOC728476 | 1.227  | 0    |
| LOC728477 | 3.649  | 0.03 |
| LOC728478 | 0.429  | 3    |
| LOC728479 | 0.663  | 0    |
| LOC728480 | 1.509  | 0    |
| LOC728481 | 7.802  | 0    |
| LOC728482 | 0.456  | 0.65 |
| LOC728483 | 0.357  | 0    |
| LOC728484 | 0.483  | 0.61 |
| LOC728485 | 1.918  | 0.11 |
| LOC728486 | 6.375  | 0    |
| LOC728487 | 0.972  | 0.1  |
| LOC728488 | 13.689 | 0    |
| LOC728490 | 0.768  | 0    |
| LOC728492 | 5.218  | 0    |
| LOC728493 | 1.042  | 0.1  |
| LOC728494 | 0.456  | 0.21 |
| LOC728495 | 1.978  | 0    |
| LOC728496 | 12.148 | 0    |
| LOC728497 | 1.104  | 0    |
| LOC728498 | 13.724 | 0.02 |
| LOC728499 | 3.505  | 0    |
| LOC728500 | 0.615  | 0    |
| LOC728501 | 0.57   | 0    |
| LOC728502 | 1.481  | 2.87 |
| LOC728503 | 1.015  | 0    |
| LOC728504 | 1.111  | 0.09 |

|           |        |         |
|-----------|--------|---------|
| LOC728506 | 13.578 | 0       |
| LOC728507 | 0.765  | 0       |
| LOC728508 | 1.149  | 1.29    |
| LOC728509 | 3.388  | 0.47    |
| LOC728510 | 0.518  | 0       |
| LOC728511 | 0.896  | 0.11    |
| LOC728512 | 0.39   | 121.26  |
| LOC728513 | 1.2    | 0       |
| LOC728514 | 1.266  | 0.39    |
| LOC728515 | 0.285  | 1.04    |
| LOC728516 | 0.412  | 0       |
| LOC728517 | 6.691  | 0       |
| LOC728518 | 1.406  | 0.49    |
| LOC728519 | 5.352  | 0       |
| LOC728520 | 1.139  | 0       |
| LOC728521 | 0.684  | 0       |
| LOC728522 | 1.878  | 0.73    |
| LOC728523 | 0.576  | 1.55    |
| LOC728524 | 0.798  | 0       |
| LOC728525 | 0.588  | 0       |
| LOC728526 | 3.46   | 0       |
| LOC728527 | 0.406  | 0       |
| LOC728528 | 0.459  | 0       |
| LOC728529 | 0.426  | 0       |
| LOC728530 | 0.926  | 1.71    |
| LOC728531 | 0.714  | 0.97    |
| LOC728532 | 19.929 | 0.42    |
| LOC728533 | 2.377  | 12.49   |
| LOC728534 | 0.788  | 0.12    |
| LOC728535 | 0.788  | 0       |
| LOC728536 | 1.224  | 0.24    |
| LOC728537 | 1.069  | 1.3     |
| LOC728538 | 0.476  | 1.24    |
| LOC728539 | 1.183  | 0       |
| LOC728540 | 3.461  | 0       |
| LOC728541 | 0.861  | 1.15    |
| LOC728542 | 1.065  | 0       |
| LOC728543 | 1.479  | 0.54    |
| LOC728544 | 0.947  | 0       |
| LOC728545 | 0.388  | 0       |
| LOC728546 | 0.693  | 1.86    |
| LOC728547 | 0.954  | 0       |
| LOC728548 | 0.624  | 0       |
| LOC728549 | 0.783  | 0.51    |
| LOC728550 | 2.136  | 0       |
| LOC728551 | 0.294  | 41.05   |
| LOC728552 | 0.579  | 0.17    |
| LOC728553 | 0.729  | 1081.38 |
| LOC728554 | 10.849 | 4.01    |
| LOC728555 | 0.981  | 0       |

|           |        |       |
|-----------|--------|-------|
| LOC728557 | 0.702  | 0     |
| LOC728558 | 0.647  | 0.46  |
| LOC728559 | 1.2    | 0     |
| LOC728560 | 2.998  | 1.62  |
| LOC728561 | 0.813  | 0.85  |
| LOC728562 | 4.47   | 0.07  |
| LOC728563 | 0.12   | 0     |
| LOC728564 | 4.601  | 0.69  |
| LOC728565 | 94.501 | 0     |
| LOC728566 | 0.534  | 0     |
| LOC728567 | 0.488  | 0.41  |
| LOC728569 | 0.738  | 0.13  |
| LOC728570 | 1.26   | 0     |
| LOC728571 | 1.71   | 0     |
| LOC728572 | 0.409  | 2.66  |
| LOC728573 | 2.209  | 0     |
| LOC728574 | 1.167  | 0     |
| LOC728575 | 3.46   | 0     |
| LOC728576 | 0.966  | 3.07  |
| LOC728577 | 5.222  | 0     |
| LOC728578 | 1.794  | 0     |
| LOC728579 | 0.729  | 0     |
| LOC728580 | 0.591  | 0     |
| LOC728581 | 0.402  | 0     |
| LOC728582 | 0.951  | 0     |
| LOC728583 | 0.468  | 0     |
| LOC728584 | 0.573  | 0     |
| LOC728585 | 0.645  | 1.08  |
| LOC728587 | 0.408  | 0     |
| LOC728588 | 0.87   | 0     |
| LOC728589 | 2.565  | 2.35  |
| LOC728590 | 0.565  | 54.28 |
| LOC728591 | 0.98   | 0     |
| LOC728592 | 1.898  | 0.37  |
| LOC728593 | 0.327  | 0.6   |
| LOC728594 | 0.66   | 0     |
| LOC728595 | 0.454  | 0     |
| LOC728596 | 0.441  | 0     |
| LOC728597 | 1.596  | 0     |
| LOC728598 | 1.122  | 0     |
| LOC728599 | 2.04   | 1.6   |
| LOC728600 | 0.927  | 0     |
| LOC728601 | 1.603  | 0     |
| LOC728602 | 15.548 | 0.28  |
| LOC728603 | 1.425  | 0     |
| LOC728604 | 1.38   | 2.29  |
| LOC728605 | 0.765  | 0     |
| LOC728607 | 0.555  | 0.89  |
| LOC728610 | 0.849  | 1.4   |
| LOC728611 | 8.545  | 0.07  |



|           |        |        |
|-----------|--------|--------|
| LOC728612 | 2.314  | 0      |
| LOC728613 | 2.362  | 0.3    |
| LOC728614 | 1.823  | 0      |
| LOC728615 | 4.498  | 0      |
| LOC728616 | 0.474  | 0      |
| LOC728617 | 0.762  | 1.69   |
| LOC728618 | 0.546  | 0.54   |
| LOC728619 | 1.446  | 0.34   |
| LOC728620 | 0.744  | 0.13   |
| LOC728622 | 0.871  | 4.54   |
| LOC728623 | 5.248  | 1.43   |
| LOC728624 | 0.635  | 0      |
| LOC728625 | 0.45   | 0.22   |
| LOC728626 | 0.826  | 0      |
| LOC728627 | 1.288  | 0      |
| LOC728628 | 0.645  | 0      |
| LOC728629 | 1.484  | 0      |
| LOC728630 | 2.673  | 0      |
| LOC728631 | 0.366  | 0      |
| LOC728632 | 1.245  | 0.24   |
| LOC728633 | 0.279  | 0      |
| LOC728634 | 0.807  | 0      |
| LOC728635 | 1.249  | 0.32   |
| LOC728636 | 13.088 | 0      |
| LOC728637 | 1.04   | 0      |
| LOC728639 | 0.906  | 0      |
| LOC728640 | 2.52   | 0      |
| LOC728641 | 1.038  | 0.57   |
| LOC728642 | 2.415  | 34.21  |
| LOC728643 | 1.064  | 0.65   |
| LOC728644 | 55.391 | 0      |
| LOC728645 | 0.627  | 2.05   |
| LOC728646 | 1.683  | 0.47   |
| LOC728647 | 1.459  | 0      |
| LOC728648 | 1.215  | 0      |
| LOC728649 | 1.85   | 0.16   |
| LOC728650 | 0.447  | 0      |
| LOC728651 | 1.206  | 2.21   |
| LOC728652 | 0.33   | 0      |
| LOC728653 | 2.556  | 0.23   |
| LOC728654 | 0.584  | 0      |
| LOC728655 | 0.484  | 0      |
| LOC728656 | 1.524  | 0      |
| LOC728657 | 4.21   | 0      |
| LOC728658 | 0.715  | 388.28 |
| LOC728659 | 1.467  | 0      |
| LOC728660 | 0.59   | 0      |
| LOC728661 | 6.292  | 22.3   |
| LOC728662 | 0.224  | 0      |
| LOC728663 | 0.396  | 0      |

|           |        |       |
|-----------|--------|-------|
| LOC728664 | 1.522  | 1.04  |
| LOC728665 | 1.006  | 0     |
| LOC728666 | 0.893  | 0.88  |
| LOC728667 | 0.486  | 0     |
| LOC728668 | 1.143  | 0     |
| LOC728669 | 0.519  | 27.83 |
| LOC728670 | 1.308  | 0     |
| LOC728671 | 0.855  | 0     |
| LOC728672 | 1.757  | 5.86  |
| LOC728673 | 1.48   | 0.07  |
| LOC728674 | 0.774  | 0     |
| LOC728675 | 0.18   | 0     |
| LOC728676 | 0.714  | 0.14  |
| LOC728677 | 2.186  | 3.17  |
| LOC728678 | 3.291  | 0.03  |
| LOC728679 | 0.933  | 0     |
| LOC728680 | 0.768  | 3.35  |
| LOC728681 | 0.705  | 1.82  |
| LOC728682 | 0.207  | 0     |
| LOC728683 | 1.366  | 0     |
| LOC728684 | 0.642  | 0     |
| LOC728685 | 2.292  | 0.04  |
| LOC728686 | 0.417  | 10.92 |
| LOC728687 | 2.055  | 0     |
| LOC728688 | 1.839  | 1.83  |
| LOC728689 | 4.034  | 41.77 |
| LOC728690 | 1.812  | 0     |
| LOC728691 | 0.63   | 0     |
| LOC728692 | 1.584  | 0.31  |
| LOC728693 | 0.572  | 0.86  |
| LOC728694 | 0.58   | 0     |
| LOC728696 | 0.723  | 0     |
| LOC728697 | 0.594  | 0.17  |
| LOC728698 | 6.566  | 1.16  |
| LOC728699 | 0.483  | 0.82  |
| LOC728700 | 1.031  | 0     |
| LOC728701 | 1.865  | 0.05  |
| LOC728702 | 0.627  | 0     |
| LOC728703 | 0.3    | 0.33  |
| LOC728704 | 2.73   | 1.56  |
| LOC728705 | 2.176  | 0.73  |
| LOC728706 | 1.011  | 2.15  |
| LOC728707 | 1.361  | 0     |
| LOC728708 | 71.841 | 0     |
| LOC728709 | 0.818  | 0     |
| LOC728710 | 0.297  | 0     |
| LOC728711 | 0.9    | 0     |
| LOC728713 | 0.231  | 58.25 |
| LOC728714 | 0.48   | 2.27  |
| LOC728715 | 0.659  | 2.4   |

|           |         |       |
|-----------|---------|-------|
| LOC728717 | 0.777   | 0     |
| LOC728718 | 0.339   | 0     |
| LOC728719 | 2.571   | 1.77  |
| LOC728720 | 1.62    | 0     |
| LOC728721 | 0.624   | 0.95  |
| LOC728722 | 0.432   | 0     |
| LOC728723 | 0.609   | 0.49  |
| LOC728725 | 4.246   | 0     |
| LOC728726 | 0.555   | 0.18  |
| LOC728727 | 0.797   | 0.12  |
| LOC728728 | 4.059   | 1.04  |
| LOC728729 | 0.429   | 0     |
| LOC728730 | 0.73    | 10.17 |
| LOC728731 | 5.52    | 0     |
| LOC728732 | 1.259   | 0.55  |
| LOC728734 | 3.94    | 0     |
| LOC728735 | 110.054 | 0.1   |
| LOC728736 | 0.429   | 0     |
| LOC728737 | 1.027   | 3.46  |
| LOC728738 | 0.498   | 0     |
| LOC728739 | 1.77    | 0.22  |
| LOC728741 | 4.253   | 0     |
| LOC728742 | 2.3     | 0.09  |
| LOC728744 | 1.654   | 0     |
| LOC728745 | 0.957   | 0     |
| LOC728746 | 1.954   | 0     |
| LOC728747 | 3.968   | 0     |
| LOC728748 | 1.755   | 0     |
| LOC728749 | 0.748   | 0     |
| LOC728750 | 0.324   | 0     |
| LOC728751 | 0.894   | 0     |
| LOC728752 | 0.636   | 0.93  |
| LOC728753 | 1.954   | 0     |
| LOC728754 | 0.412   | 0.24  |
| LOC728755 | 0.569   | 0     |
| LOC728756 | 0.825   | 0     |
| LOC728757 | 0.384   | 0     |
| LOC728759 | 60.392  | 0     |
| LOC728760 | 1.777   | 0     |
| LOC728761 | 1.809   | 0     |
| LOC728762 | 0.444   | 0     |
| LOC728763 | 4.59    | 0     |
| LOC728764 | 4.166   | 0.12  |
| LOC728765 | 1.72    | 0     |
| LOC728766 | 1.481   | 2.41  |
| LOC728767 | 0.444   | 0.22  |
| LOC728768 | 0.64    | 0     |
| LOC728769 | 1.776   | 1.79  |
| LOC728770 | 5.198   | 0.05  |
| LOC728771 | 0.606   | 0     |

|           |        |      |
|-----------|--------|------|
| LOC728772 | 4.025  | 0    |
| LOC728773 | 2.033  | 1.89 |
| LOC728774 | 0.39   | 0.26 |
| LOC728775 | 0.74   | 0    |
| LOC728777 | 0.459  | 0    |
| LOC728778 | 2.297  | 2.28 |
| LOC728779 | 0.456  | 0    |
| LOC728780 | 2.292  | 0    |
| LOC728781 | 0.593  | 0    |
| LOC728782 | 0.571  | 0.17 |
| LOC728783 | 9.457  | 0    |
| LOC728784 | 0.447  | 0    |
| LOC728785 | 0.471  | 6.51 |
| LOC728787 | 3.079  | 5.69 |
| LOC728788 | 0.993  | 0    |
| LOC728789 | 2.359  | 0    |
| LOC728790 | 2.336  | 0    |
| LOC728791 | 0.531  | 0.75 |
| LOC728792 | 0.645  | 0    |
| LOC728793 | 0.438  | 0    |
| LOC728794 | 0.769  | 6.95 |
| LOC728796 | 0.978  | 0.1  |
| LOC728797 | 1.956  | 0    |
| LOC728798 | 1.425  | 0    |
| LOC728799 | 2.671  | 0    |
| LOC728800 | 1.148  | 0    |
| LOC728801 | 0.99   | 0    |
| LOC728802 | 4.301  | 0.12 |
| LOC728804 | 4.812  | 0.29 |
| LOC728805 | 1.625  | 0    |
| LOC728806 | 2      | 0.75 |
| LOC728807 | 16.322 | 0.05 |
| LOC728808 | 0.576  | 0    |
| LOC728809 | 2.211  | 0.18 |
| LOC728810 | 0.324  | 0    |
| LOC728811 | 15.175 | 0.01 |
| LOC728812 | 0.49   | 0.2  |
| LOC728813 | 4.201  | 0.09 |
| LOC728814 | 0.63   | 0    |
| LOC728815 | 0.588  | 0.17 |
| LOC728816 | 0.697  | 0    |
| LOC728817 | 1.957  | 1.47 |
| LOC728818 | 0.757  | 0.13 |
| LOC728820 | 0.497  | 0.8  |
| LOC728821 | 0.429  | 0    |
| LOC728822 | 0.828  | 0    |
| LOC728823 | 0.466  | 0.43 |
| LOC728824 | 1.716  | 0    |
| LOC728825 | 1.069  | 0.56 |
| LOC728826 | 0.327  | 0    |

|           |        |       |
|-----------|--------|-------|
| LOC728827 | 0.762  | 0     |
| LOC728828 | 0.684  | 0.44  |
| LOC728829 | 0.498  | 0     |
| LOC728830 | 0.803  | 0     |
| LOC728831 | 0.513  | 0.2   |
| LOC728832 | 3.734  | 0     |
| LOC728833 | 1.261  | 0     |
| LOC728834 | 0.554  | 0     |
| LOC728835 | 2.035  | 0     |
| LOC728836 | 1.468  | 0     |
| LOC728837 | 0.864  | 0     |
| LOC728838 | 0.758  | 0     |
| LOC728839 | 0.444  | 0     |
| LOC728840 | 0.324  | 0     |
| LOC728841 | 89.339 | 0     |
| LOC728842 | 0.484  | 0     |
| LOC728843 | 0.811  | 0.36  |
| LOC728844 | 1.81   | 71.77 |
| LOC728845 | 0.369  | 0     |
| LOC728846 | 0.81   | 0.74  |
| LOC728847 | 0.573  | 0     |
| LOC728848 | 0.948  | 2.09  |
| LOC728849 | 10.12  | 0     |
| LOC728850 | 1.925  | 0     |
| LOC728851 | 1.208  | 0.33  |
| LOC728852 | 1.038  | 0.1   |
| LOC728853 | 10.792 | 0     |
| LOC728854 | 1.613  | 0     |
| LOC728855 | 0.536  | 1.11  |
| LOC728856 | 1.422  | 0     |
| LOC728857 | 0.494  | 0     |
| LOC728860 | 3.807  | 0     |
| LOC728861 | 0.561  | 0     |
| LOC728862 | 7.318  | 29.26 |
| LOC728863 | 1.323  | 0     |
| LOC728864 | 0.642  | 0     |
| LOC728866 | 3.167  | 0     |
| LOC728867 | 0.489  | 0.2   |
| LOC728868 | 2.626  | 0.45  |
| LOC728869 | 0.332  | 0     |
| LOC728870 | 0.621  | 0     |
| LOC728871 | 0.39   | 0     |
| LOC728872 | 0.876  | 0     |
| LOC728873 | 0.342  | 2.32  |
| LOC728874 | 1.596  | 12.27 |
| LOC728875 | 0.536  | 1.11  |
| LOC728876 | 0.537  | 0.74  |
| LOC728877 | 0.492  | 0     |
| LOC728878 | 0.93   | 0     |
| LOC728879 | 0.744  | 0.13  |

|           |        |      |
|-----------|--------|------|
| LOC728880 | 0.414  | 0    |
| LOC728882 | 3.489  | 0.12 |
| LOC728883 | 1.05   | 0    |
| LOC728884 | 0.519  | 0    |
| LOC728885 | 0.74   | 8.69 |
| LOC728886 | 2.1    | 0    |
| LOC728887 | 1.14   | 1.12 |
| LOC728888 | 31.849 | 0.18 |
| LOC728889 | 1.05   | 0    |
| LOC728890 | 1.64   | 0    |
| LOC728891 | 6.3    | 0    |
| LOC728892 | 0.516  | 0.58 |
| LOC728893 | 0.771  | 0    |
| LOC728894 | 1.581  | 0    |
| LOC728895 | 9.275  | 0.37 |
| LOC728896 | 1.044  | 0.76 |
| LOC728897 | 0.441  | 0    |
| LOC728898 | 0.702  | 0    |
| LOC728899 | 0.228  | 0    |
| LOC728900 | 20.143 | 0    |
| LOC728901 | 2.336  | 0    |
| LOC728902 | 1.044  | 0    |
| LOC728903 | 3.915  | 0    |
| LOC728904 | 0.728  | 0    |
| LOC728905 | 2.359  | 0    |
| LOC728906 | 1.122  | 0    |
| LOC728907 | 0.984  | 0    |
| LOC728908 | 4.012  | 0    |
| LOC728909 | 0.42   | 0    |
| LOC728910 | 0.497  | 0    |
| LOC728912 | 3.539  | 0.2  |
| LOC728913 | 3.36   | 9.24 |
| LOC728914 | 0.638  | 0.62 |
| LOC728915 | 0.813  | 0.24 |
| LOC728916 | 1.653  | 0.12 |
| LOC728917 | 1.443  | 0.21 |
| LOC728919 | 1.451  | 0    |
| LOC728920 | 5.372  | 0.02 |
| LOC728921 | 0.835  | 0.83 |
| LOC728922 | 0.465  | 0    |
| LOC728923 | 0.774  | 2.68 |
| LOC728924 | 0.827  | 0    |
| LOC728925 | 0.842  | 0    |
| LOC728926 | 2.012  | 0    |
| LOC728927 | 1.317  | 6.92 |
| LOC728928 | 0.882  | 0.78 |
| LOC728929 | 1.877  | 0    |
| LOC728930 | 0.667  | 0.3  |
| LOC728931 | 1.442  | 4.94 |
| LOC728932 | 1.523  | 0    |

|           |        |       |
|-----------|--------|-------|
| LOC728933 | 1.029  | 0     |
| LOC728934 | 0.875  | 0     |
| LOC728935 | 1.239  | 0     |
| LOC728936 | 10.335 | 0.19  |
| LOC728937 | 0.49   | 0     |
| LOC728939 | 3.88   | 0.03  |
| LOC728940 | 0.628  | 0     |
| LOC728941 | 0.597  | 1     |
| LOC728942 | 1.024  | 0     |
| LOC728943 | 0.797  | 0     |
| LOC728944 | 2.256  | 0     |
| LOC728945 | 1.136  | 0     |
| LOC728946 | 0.903  | 0     |
| LOC728947 | 0.213  | 0     |
| LOC728948 | 0.339  | 0     |
| LOC728949 | 0.432  | 0     |
| LOC728950 | 0.705  | 0     |
| LOC728951 | 0.972  | 0     |
| LOC728952 | 0.366  | 0     |
| LOC728953 | 0.506  | 266.7 |
| LOC728954 | 1.793  | 1.21  |
| LOC728955 | 0.322  | 0     |
| LOC728956 | 1.203  | 0     |
| LOC728957 | 3.683  | 0     |
| LOC728958 | 0.72   | 0.28  |
| LOC728959 | 0.54   | 0     |
| LOC728960 | 0.579  | 0.85  |
| LOC728961 | 0.796  | 0     |
| LOC728962 | 0.279  | 0     |
| LOC728963 | 0.914  | 0.86  |
| LOC728964 | 2.129  | 0.56  |
| LOC728965 | 2.163  | 0     |
| LOC728966 | 0.44   | 0     |
| LOC728967 | 1.996  | 0     |
| LOC728968 | 1.428  | 0     |
| LOC728969 | 4.055  | 1.14  |
| LOC728970 | 0.688  | 0     |
| LOC728971 | 0.948  | 0.31  |
| LOC728972 | 0.69   | 0     |
| LOC728973 | 0.691  | 1.43  |
| LOC728974 | 2.301  | 20.25 |
| LOC728975 | 1.857  | 0.37  |
| LOC728976 | 1.821  | 0     |
| LOC728977 | 0.603  | 0.33  |
| LOC728979 | 0.686  | 34.61 |
| LOC728980 | 3.211  | 2.25  |
| LOC728981 | 0.639  | 0     |
| LOC728982 | 0.504  | 0     |
| LOC728983 | 1.122  | 0     |
| LOC728984 | 0.696  | 4.55  |

|           |        |       |
|-----------|--------|-------|
| LOC728985 | 0.6    | 0     |
| LOC728986 | 0.264  | 1.5   |
| LOC728987 | 0.564  | 0     |
| LOC728988 | 0.581  | 0.68  |
| LOC728989 | 1.876  | 3.11  |
| LOC728990 | 35.733 | 0.01  |
| LOC728991 | 2.143  | 0     |
| LOC728992 | 0.894  | 0.44  |
| LOC728993 | 0.837  | 0     |
| LOC728994 | 1.136  | 6.01  |
| LOC728995 | 0.678  | 2.48  |
| LOC728996 | 2.48   | 0.12  |
| LOC728997 | 0.6    | 0     |
| LOC728998 | 0.285  | 0     |
| LOC729000 | 0.825  | 0     |
| LOC729001 | 0.261  | 0     |
| LOC729002 | 0.564  | 0.18  |
| LOC729003 | 3.906  | 2.25  |
| LOC729004 | 0.734  | 0.94  |
| LOC729005 | 0.378  | 0.79  |
| LOC729006 | 0.547  | 0     |
| LOC729007 | 0.456  | 0     |
| LOC729008 | 2.153  | 0.14  |
| LOC729009 | 22.822 | 0.04  |
| LOC729010 | 0.994  | 1.99  |
| LOC729011 | 0.731  | 0     |
| LOC729012 | 0.799  | 0.37  |
| LOC729013 | 1.165  | 1.27  |
| LOC729014 | 1.497  | 0     |
| LOC729015 | 1.167  | 0     |
| LOC729016 | 0.759  | 4.17  |
| LOC729017 | 0.936  | 0.11  |
| LOC729018 | 0.84   | 1.77  |
| LOC729021 | 6.544  | 5.59  |
| LOC729022 | 0.813  | 1.34  |
| LOC729023 | 12.784 | 0.03  |
| LOC729024 | 0.621  | 0     |
| LOC729025 | 1.74   | 0     |
| LOC729026 | 0.534  | 0     |
| LOC729027 | 1.191  | 6.98  |
| LOC729028 | 0.906  | 0.44  |
| LOC729029 | 1.61   | 1.9   |
| LOC729030 | 0.888  | 11.47 |
| LOC729031 | 0.255  | 0     |
| LOC729032 | 0.354  | 0     |
| LOC729033 | 2.236  | 1.2   |
| LOC729034 | 3.057  | 0     |
| LOC729035 | 0.378  | 0.78  |
| LOC729036 | 1.287  | 0     |
| LOC729037 | 0.654  | 0     |



|           |        |      |
|-----------|--------|------|
| LOC729038 | 0.42   | 0    |
| LOC729039 | 1.227  | 0    |
| LOC729040 | 1.046  | 0    |
| LOC729041 | 1.035  | 0    |
| LOC729042 | 0.603  | 0.16 |
| LOC729043 | 1.215  | 0.41 |
| LOC729044 | 1.098  | 0.81 |
| LOC729045 | 0.859  | 0.12 |
| LOC729046 | 1.428  | 0.76 |
| LOC729047 | 2.751  | 0    |
| LOC729048 | 0.543  | 0    |
| LOC729049 | 2.882  | 0    |
| LOC729050 | 1.434  | 0    |
| LOC729051 | 0.551  | 0    |
| LOC729053 | 0.387  | 0    |
| LOC729054 | 0.949  | 0.2  |
| LOC729055 | 12.451 | 0    |
| LOC729056 | 0.312  | 0    |
| LOC729057 | 1.565  | 0.06 |
| LOC729059 | 0.952  | 0    |
| LOC729060 | 1.049  | 0.47 |
| LOC729061 | 0.516  | 0    |
| LOC729062 | 0.432  | 0.69 |
| LOC729063 | 0.531  | 7.46 |
| LOC729064 | 0.477  | 0    |
| LOC729065 | 0.725  | 0    |
| LOC729066 | 0.135  | 0    |
| LOC729067 | 0.246  | 0    |
| LOC729068 | 0.348  | 0.57 |
| LOC729069 | 0.526  | 0    |
| LOC729070 | 0.788  | 0    |
| LOC729071 | 0.393  | 0    |
| LOC729072 | 0.615  | 0    |
| LOC729073 | 1.328  | 0    |
| LOC729074 | 25.563 | 0    |
| LOC729075 | 0.195  | 1.52 |
| LOC729076 | 0.432  | 0    |
| LOC729077 | 0.324  | 0    |
| LOC729078 | 0.59   | 0    |
| LOC729079 | 0.885  | 0.67 |
| LOC729080 | 1.08   | 0    |
| LOC729081 | 1.89   | 1.1  |
| LOC729082 | 0.943  | 3.67 |
| LOC729083 | 0.897  | 0    |
| LOC729084 | 0.528  | 0    |
| LOC729085 | 2.628  | 0    |
| LOC729086 | 2.95   | 2.59 |
| LOC729087 | 0.759  | 0    |
| LOC729088 | 1.375  | 1.37 |
| LOC729089 | 1.455  | 0    |

|           |        |       |
|-----------|--------|-------|
| LOC729090 | 7.158  | 0.26  |
| LOC729093 | 2.081  | 0.43  |
| LOC729094 | 0.706  | 0     |
| LOC729095 | 0.756  | 0     |
| LOC729096 | 12.696 | 0.18  |
| LOC729097 | 0.781  | 13.93 |
| LOC729098 | 0.585  | 0     |
| LOC729099 | 0.615  | 0     |
| LOC729100 | 0.183  | 0     |
| LOC729101 | 0.601  | 0.17  |
| LOC729102 | 0.946  | 0.94  |
| LOC729103 | 0.714  | 0.42  |
| LOC729104 | 0.594  | 0.84  |
| LOC729105 | 45.852 | 0.01  |
| LOC729106 | 0.693  | 0     |
| LOC729107 | 0.537  | 0     |
| LOC729108 | 1.323  | 0.15  |
| LOC729109 | 0.916  | 1.08  |
| LOC729110 | 0.333  | 0     |
| LOC729111 | 0.375  | 0     |
| LOC729112 | 0.543  | 0     |
| LOC729113 | 0.579  | 0     |
| LOC729114 | 0.978  | 0     |
| LOC729115 | 0.33   | 0.6   |
| LOC729116 | 0.225  | 10.11 |
| LOC729117 | 0.585  | 0     |
| LOC729118 | 8.376  | 0.18  |
| LOC729119 | 0.615  | 28    |
| LOC729120 | 1.117  | 0     |
| LOC729121 | 0.881  | 0     |
| LOC729122 | 0.628  | 0.16  |
| LOC729123 | 1.463  | 0.2   |
| LOC729124 | 0.903  | 1.64  |
| LOC729125 | 0.378  | 0     |
| LOC729126 | 0.489  | 0.6   |
| LOC729127 | 2.068  | 0     |
| LOC729128 | 0.378  | 0     |
| LOC729129 | 0.666  | 0     |
| LOC729130 | 0.553  | 2.86  |
| LOC729131 | 7.056  | 0     |
| LOC729132 | 0.522  | 0     |
| LOC729133 | 0.705  | 0     |
| LOC729134 | 0.579  | 0     |
| LOC729135 | 3.901  | 1.25  |
| LOC729136 | 1.167  | 0     |
| LOC729137 | 2.198  | 0     |
| LOC729138 | 0.397  | 46.11 |
| LOC729139 | 0.129  | 4.6   |
| LOC729140 | 0.312  | 0     |
| LOC729141 | 10.499 | 0.18  |

|           |        |       |
|-----------|--------|-------|
| LOC729142 | 2.012  | 0     |
| LOC729143 | 3.802  | 6.04  |
| LOC729144 | 0.744  | 0     |
| LOC729145 | 0.471  | 0.21  |
| LOC729146 | 0.579  | 3.24  |
| LOC729147 | 1.008  | 0     |
| LOC729148 | 3.877  | 2.14  |
| LOC729149 | 1.137  | 0     |
| LOC729150 | 1.664  | 0.12  |
| LOC729151 | 0.861  | 1.38  |
| LOC729152 | 0.891  | 0     |
| LOC729153 | 5.812  | 0.05  |
| LOC729154 | 1.502  | 12.78 |
| LOC729155 | 0.195  | 0.51  |
| LOC729156 | 1.452  | 0.28  |
| LOC729157 | 1.5    | 0.26  |
| LOC729158 | 0.552  | 0     |
| LOC729159 | 1.248  | 0     |
| LOC729160 | 0.447  | 0     |
| LOC729161 | 0.559  | 0.71  |
| LOC729162 | 1.152  | 0     |
| LOC729163 | 0.668  | 0     |
| LOC729165 | 0.453  | 0     |
| LOC729166 | 0.864  | 0     |
| LOC729167 | 0.645  | 0     |
| LOC729168 | 13.537 | 0.04  |
| LOC729169 | 1.824  | 0     |
| LOC729170 | 0.953  | 0     |
| LOC729172 | 2.428  | 4.36  |
| LOC729173 | 2.188  | 0     |
| LOC729174 | 0.501  | 0     |
| LOC729175 | 0.908  | 0     |
| LOC729176 | 2.201  | 0.36  |
| LOC729177 | 1.993  | 0     |
| LOC729178 | 0.333  | 0     |
| LOC729179 | 1.458  | 0.07  |
| LOC729180 | 0.633  | 0     |
| LOC729181 | 0.273  | 1.08  |
| LOC729182 | 2.298  | 0.9   |
| LOC729183 | 0.489  | 0.2   |
| LOC729184 | 0.936  | 0     |
| LOC729185 | 1.207  | 0.08  |
| LOC729186 | 0.642  | 0     |
| LOC729187 | 1.615  | 0     |
| LOC729188 | 0.457  | 0.21  |
| LOC729189 | 1.577  | 0     |
| LOC729190 | 0.765  | 0     |
| LOC729191 | 3.079  | 1.03  |
| LOC729192 | 0.786  | 0     |
| LOC729193 | 4.008  | 0.03  |

|           |         |        |
|-----------|---------|--------|
| LOC729194 | 0.567   | 0.7    |
| LOC729195 | 2.661   | 0      |
| LOC729196 | 1.292   | 0.08   |
| LOC729197 | 11.355  | 0      |
| LOC729198 | 0.775   | 1.91   |
| LOC729199 | 2.216   | 0      |
| LOC729200 | 0.715   | 9.68   |
| LOC729202 | 0.414   | 0.24   |
| LOC729203 | 1.354   | 0      |
| LOC729204 | 1.015   | 0      |
| LOC729205 | 0.678   | 0      |
| LOC729206 | 0.687   | 0      |
| LOC729207 | 0.81    | 1.1    |
| LOC729208 | 0.519   | 0.19   |
| LOC729209 | 1.338   | 2.51   |
| LOC729210 | 0.549   | 0.9    |
| LOC729211 | 22.577  | 0.43   |
| LOC729212 | 2.575   | 1.15   |
| LOC729213 | 63.289  | 0      |
| LOC729214 | 1.048   | 0      |
| LOC729215 | 0.869   | 0.8    |
| LOC729216 | 17.802  | 0.03   |
| LOC729217 | 142.009 | 0.01   |
| LOC729218 | 1.04    | 0.95   |
| LOC729219 | 0.687   | 0      |
| LOC729221 | 0.579   | 0      |
| LOC729222 | 57.739  | 0.09   |
| LOC729223 | 0.864   | 0      |
| LOC729225 | 1.76    | 0.11   |
| LOC729226 | 12.669  | 0.01   |
| LOC729227 | 0.744   | 0      |
| LOC729228 | 0.687   | 0      |
| LOC729229 | 0.509   | 0      |
| LOC729230 | 4.871   | 0.04   |
| LOC729231 | 1.5     | 0      |
| LOC729232 | 0.771   | 3.47   |
| LOC729233 | 1.847   | 0      |
| LOC729234 | 12.593  | 0.38   |
| LOC729235 | 0.687   | 0      |
| LOC729236 | 0.559   | 444.07 |
| LOC729238 | 3.672   | 0      |
| LOC729239 | 0.417   | 0      |
| LOC729240 | 1.847   | 0      |
| LOC729241 | 0.546   | 0      |
| LOC729242 | 0.557   | 0      |
| LOC729243 | 0.366   | 0.27   |
| LOC729244 | 0.727   | 0.13   |
| LOC729245 | 0.975   | 0      |
| LOC729246 | 1.847   | 0      |
| LOC729247 | 1.092   | 0      |

|           |        |        |
|-----------|--------|--------|
| LOC729248 | 1.622  | 0.79   |
| LOC729249 | 0.69   | 0.43   |
| LOC729250 | 1.847  | 0      |
| LOC729251 | 0.281  | 0      |
| LOC729252 | 4.704  | 0      |
| LOC729253 | 0.45   | 0.44   |
| LOC729255 | 0.411  | 8.91   |
| LOC729256 | 1.14   | 0      |
| LOC729257 | 1.296  | 0.08   |
| LOC729258 | 1.682  | 0.12   |
| LOC729259 | 3.218  | 0.09   |
| LOC729260 | 1.461  | 0.14   |
| LOC729261 | 0.273  | 0      |
| LOC729262 | 4.868  | 0      |
| LOC729264 | 4.938  | 0      |
| LOC729265 | 0.481  | 0      |
| LOC729266 | 12.205 | 0      |
| LOC729267 | 2.057  | 19.77  |
| LOC729269 | 3.075  | 0.87   |
| LOC729270 | 0.273  | 0      |
| LOC729271 | 0.474  | 0      |
| LOC729272 | 2.957  | 0      |
| LOC729273 | 0.273  | 0      |
| LOC729274 | 0.889  | 1.56   |
| LOC729275 | 1.794  | 1.6    |
| LOC729276 | 1.02   | 0      |
| LOC729277 | 6.78   | 0      |
| LOC729278 | 0.273  | 0      |
| LOC729279 | 0.458  | 388.84 |
| LOC729280 | 1.075  | 0      |
| LOC729281 | 0.723  | 1.24   |
| LOC729282 | 8.574  | 0      |
| LOC729283 | 0.243  | 0      |
| LOC729284 | 0.273  | 0      |
| LOC729285 | 0.958  | 0      |
| LOC729286 | 0.591  | 1.67   |
| LOC729287 | 0.348  | 0      |
| LOC729288 | 0.689  | 0.14   |
| LOC729289 | 1.99   | 0      |
| LOC729290 | 1.849  | 39.6   |
| LOC729291 | 3.232  | 0.43   |
| LOC729292 | 0.668  | 0      |
| LOC729293 | 0.213  | 1.4    |
| LOC729294 | 2.469  | 0      |
| LOC729295 | 1.011  | 0      |
| LOC729296 | 1.024  | 0      |
| LOC729297 | 2.718  | 0      |
| LOC729298 | 0.954  | 1.14   |
| LOC729299 | 0.768  | 0      |
| LOC729300 | 0.483  | 0      |

|           |        |       |
|-----------|--------|-------|
| LOC729301 | 0.641  | 1.08  |
| LOC729302 | 0.42   | 0     |
| LOC729303 | 1.176  | 0     |
| LOC729304 | 0.756  | 0     |
| LOC729305 | 1.507  | 0     |
| LOC729306 | 0.495  | 0.2   |
| LOC729307 | 0.541  | 0     |
| LOC729309 | 0.899  | 0     |
| LOC729310 | 0.44   | 0     |
| LOC729311 | 0.786  | 0.25  |
| LOC729312 | 0.94   | 0.11  |
| LOC729313 | 0.665  | 0.6   |
| LOC729314 | 11.942 | 0.03  |
| LOC729315 | 0.666  | 0     |
| LOC729316 | 4.566  | 3.57  |
| LOC729317 | 1.706  | 28.19 |
| LOC729318 | 0.717  | 0     |
| LOC729319 | 1.062  | 0     |
| LOC729320 | 0.864  | 2.06  |
| LOC729321 | 0.44   | 0     |
| LOC729322 | 1.125  | 0.27  |
| LOC729323 | 0.44   | 0     |
| LOC729325 | 0.609  | 2.44  |
| LOC729326 | 1.143  | 0     |
| LOC729327 | 0.995  | 1.69  |
| LOC729328 | 0.228  | 0     |
| LOC729329 | 22.405 | 0.03  |
| LOC729331 | 0.732  | 0.13  |
| LOC729332 | 0.414  | 0.48  |
| LOC729333 | 1.176  | 0.08  |
| LOC729334 | 41.675 | 0.11  |
| LOC729335 | 0.572  | 0     |
| LOC729336 | 1.364  | 0.36  |
| LOC729337 | 1.081  | 0     |
| LOC729338 | 3.727  | 0     |
| LOC729339 | 0.273  | 0     |
| LOC729340 | 0.659  | 1.05  |
| LOC729341 | 0.567  | 0     |
| LOC729342 | 2.964  | 0.04  |
| LOC729343 | 10.682 | 0     |
| LOC729344 | 9.351  | 0     |
| LOC729345 | 0.366  | 6.49  |
| LOC729346 | 0.273  | 0     |
| LOC729347 | 0.96   | 2.27  |
| LOC729348 | 12.008 | 0     |
| LOC729349 | 0.598  | 1.49  |
| LOC729350 | 5.605  | 0.02  |
| LOC729351 | 0.546  | 0     |
| LOC729352 | 1.063  | 0     |
| LOC729353 | 15.188 | 0     |

|           |         |        |
|-----------|---------|--------|
| LOC729355 | 4.95    | 0      |
| LOC729356 | 7.842   | 0      |
| LOC729357 | 0.318   | 0      |
| LOC729358 | 0.58    | 0      |
| LOC729360 | 0.417   | 0      |
| LOC729361 | 0.765   | 2.46   |
| LOC729362 | 0.424   | 445.45 |
| LOC729363 | 0.52    | 0      |
| LOC729364 | 0.567   | 0      |
| LOC729365 | 0.348   | 1.99   |
| LOC729366 | 1.312   | 0.45   |
| LOC729367 | 0.984   | 0      |
| LOC729368 | 1.884   | 0      |
| LOC729369 | 1.538   | 0      |
| LOC729370 | 2.185   | 0.18   |
| LOC729371 | 0.273   | 0      |
| LOC729372 | 0.273   | 0      |
| LOC729373 | 0.768   | 1.93   |
| LOC729374 | 1.107   | 0.36   |
| LOC729375 | 13.792  | 0.13   |
| LOC729376 | 0.465   | 0      |
| LOC729377 | 1.446   | 0.48   |
| LOC729378 | 0.661   | 0      |
| LOC729379 | 0.273   | 0      |
| LOC729380 | 0.153   | 0      |
| LOC729381 | 0.639   | 0      |
| LOC729382 | 0.828   | 0      |
| LOC729383 | 0.273   | 0      |
| LOC729384 | 1.651   | 0      |
| LOC729385 | 0.684   | 0      |
| LOC729386 | 1.062   | 1.4    |
| LOC729387 | 0.273   | 0      |
| LOC729388 | 0.501   | 0.2    |
| LOC729389 | 0.787   | 96.17  |
| LOC729390 | 3.316   | 0      |
| LOC729391 | 0.507   | 1.17   |
| LOC729392 | 4.441   | 0      |
| LOC729393 | 0.96    | 1.65   |
| LOC729394 | 0.273   | 0      |
| LOC729395 | 0.894   | 0      |
| LOC729396 | 0.627   | 0      |
| LOC729397 | 0.732   | 7.57   |
| LOC729398 | 0.876   | 0      |
| LOC729399 | 188.616 | 0      |
| LOC729400 | 3.85    | 0      |
| LOC729401 | 0.357   | 0      |
| LOC729402 | 0.602   | 0      |
| LOC729403 | 1.005   | 1.18   |
| LOC729404 | 1.854   | 0      |
| LOC729405 | 0.531   | 0.19   |

|           |        |      |
|-----------|--------|------|
| LOC729406 | 0.752  | 0.13 |
| LOC729407 | 0.851  | 0    |
| LOC729408 | 0.624  | 0    |
| LOC729409 | 1.581  | 0.06 |
| LOC729410 | 0.837  | 0.47 |
| LOC729411 | 0.72   | 1.1  |
| LOC729412 | 0.177  | 0    |
| LOC729413 | 0.534  | 0    |
| LOC729414 | 0.582  | 1.02 |
| LOC729415 | 0.699  | 0    |
| LOC729417 | 1.206  | 0.58 |
| LOC729418 | 0.159  | 1.87 |
| LOC729419 | 0.261  | 0    |
| LOC729421 | 0.823  | 0.48 |
| LOC729422 | 0.627  | 0    |
| LOC729423 | 7.685  | 0.12 |
| LOC729424 | 0.855  | 0    |
| LOC729425 | 0.699  | 0    |
| LOC729426 | 0.566  | 0    |
| LOC729427 | 0.755  | 0    |
| LOC729429 | 0.645  | 0.31 |
| LOC729430 | 1.235  | 1.04 |
| LOC729431 | 0.627  | 0    |
| LOC729432 | 0.46   | 0    |
| LOC729433 | 1.005  | 2.46 |
| LOC729434 | 0.414  | 0    |
| LOC729435 | 0.686  | 7.79 |
| LOC729436 | 0.768  | 1.16 |
| LOC729437 | 0.489  | 0    |
| LOC729438 | 0.99   | 0.9  |
| LOC729439 | 1.067  | 0    |
| LOC729440 | 1.825  | 0.76 |
| LOC729441 | 0.601  | 1.16 |
| LOC729442 | 0.627  | 0    |
| LOC729443 | 0.615  | 0.64 |
| LOC729444 | 1.055  | 0    |
| LOC729445 | 0.557  | 0    |
| LOC729446 | 7.377  | 0    |
| LOC729447 | 0.624  | 0    |
| LOC729448 | 0.765  | 0    |
| LOC729449 | 70.711 | 0.02 |
| LOC729450 | 3.615  | 0    |
| LOC729451 | 0.681  | 0    |
| LOC729452 | 0.761  | 0    |
| LOC729453 | 0.768  | 0    |
| LOC729454 | 0.6    | 0    |
| LOC729455 | 0.549  | 0    |
| LOC729456 | 0.273  | 0    |
| LOC729457 | 0.831  | 0.6  |
| LOC729458 | 0.65   | 0    |



|           |        |       |
|-----------|--------|-------|
| LOC729459 | 0.273  | 0     |
| LOC729460 | 1.059  | 1.78  |
| LOC729461 | 1.72   | 0     |
| LOC729462 | 0.273  | 0     |
| LOC729463 | 5.015  | 5.32  |
| LOC729464 | 1.029  | 0     |
| LOC729465 | 0.613  | 0     |
| LOC729466 | 0.719  | 18.72 |
| LOC729467 | 1.461  | 0     |
| LOC729468 | 0.543  | 0     |
| LOC729469 | 0.903  | 0     |
| LOC729470 | 0.828  | 0.12  |
| LOC729471 | 1.227  | 0.73  |
| LOC729472 | 0.384  | 0     |
| LOC729473 | 0.222  | 7.13  |
| LOC729474 | 1.149  | 0     |
| LOC729476 | 0.939  | 0     |
| LOC729477 | 0.873  | 0     |
| LOC729478 | 0.444  | 0.44  |
| LOC729479 | 0.563  | 0     |
| LOC729480 | 0.536  | 0.37  |
| LOC729481 | 0.579  | 0.52  |
| LOC729482 | 0.417  | 5.46  |
| LOC729483 | 0.339  | 1.16  |
| LOC729484 | 0.537  | 0.92  |
| LOC729485 | 0.563  | 0     |
| LOC729486 | 10.179 | 0.1   |
| LOC729487 | 1.314  | 0.07  |
| LOC729488 | 2.009  | 0     |
| LOC729489 | 0.729  | 0     |
| LOC729490 | 0.585  | 0.51  |
| LOC729491 | 1.347  | 0     |
| LOC729492 | 0.593  | 0     |
| LOC729493 | 4.895  | 1.98  |
| LOC729494 | 0.959  | 14.55 |
| LOC729495 | 5.152  | 0.19  |
| LOC729496 | 1.032  | 4.12  |
| LOC729497 | 4.397  | 0.77  |
| LOC729498 | 0.393  | 0.51  |
| LOC729499 | 0.255  | 0     |
| LOC729500 | 0.563  | 0     |
| LOC729501 | 1.377  | 0     |
| LOC729502 | 0.603  | 0     |
| LOC729503 | 1.2    | 0.25  |
| LOC729504 | 1.485  | 0.06  |
| LOC729505 | 1.74   | 0     |
| LOC729506 | 4.134  | 2.8   |
| LOC729507 | 0.888  | 0     |
| LOC729508 | 0.575  | 0     |
| LOC729509 | 0.615  | 1.93  |

|           |        |       |
|-----------|--------|-------|
| LOC729510 | 1.028  | 0     |
| LOC729511 | 1.107  | 0.18  |
| LOC729512 | 0.393  | 0     |
| LOC729513 | 29.24  | 0.12  |
| LOC729514 | 0.834  | 0     |
| LOC729515 | 1.786  | 5.87  |
| LOC729516 | 1.844  | 0     |
| LOC729517 | 1.62   | 0.18  |
| LOC729518 | 1.883  | 1.37  |
| LOC729519 | 2.223  | 0.18  |
| LOC729520 | 0.394  | 0     |
| LOC729521 | 0.624  | 0     |
| LOC729522 | 52.757 | 0.01  |
| LOC729523 | 0.237  | 0     |
| LOC729524 | 6.248  | 0     |
| LOC729525 | 0.552  | 0     |
| LOC729526 | 0.417  | 0     |
| LOC729527 | 0.414  | 0     |
| LOC729528 | 2.021  | 0     |
| LOC729529 | 0.541  | 0     |
| LOC729530 | 3.996  | 27.83 |
| LOC729531 | 0.246  | 0.4   |
| LOC729532 | 0.822  | 7.58  |
| LOC729533 | 6.847  | 0.11  |
| LOC729534 | 0.878  | 0     |
| LOC729535 | 0.733  | 0     |
| LOC729536 | 0.416  | 89.9  |
| LOC729537 | 0.381  | 0     |
| LOC729538 | 1.104  | 0.09  |
| LOC729541 | 1.131  | 0.79  |
| LOC729542 | 0.645  | 0.92  |
| LOC729543 | 0.546  | 0     |
| LOC729544 | 0.123  | 0     |
| LOC729545 | 1.2    | 0.33  |
| LOC729546 | 0.357  | 0     |
| LOC729547 | 0.873  | 0.57  |
| LOC729548 | 2.254  | 0.27  |
| LOC729549 | 1.65   | 0.06  |
| LOC729550 | 16.433 | 0.01  |
| LOC729551 | 0.306  | 0     |
| LOC729552 | 0.672  | 0     |
| LOC729553 | 0.57   | 0.17  |
| LOC729554 | 0.825  | 4.2   |
| LOC729555 | 0.348  | 0     |
| LOC729556 | 0.817  | 0.73  |
| LOC729557 | 0.579  | 4.78  |
| LOC729558 | 0.598  | 0     |
| LOC729559 | 2.146  | 5.99  |
| LOC729560 | 0.498  | 0     |
| LOC729561 | 16.966 | 1.43  |

|           |       |       |
|-----------|-------|-------|
| LOC729562 | 0.411 | 0     |
| LOC729563 | 1.389 | 1.07  |
| LOC729564 | 1.197 | 0     |
| LOC729565 | 0.637 | 7.45  |
| LOC729566 | 0.408 | 3.39  |
| LOC729567 | 0.606 | 0.65  |
| LOC729568 | 0.72  | 0     |
| LOC729569 | 1.216 | 0     |
| LOC729570 | 1.356 | 3.64  |
| LOC729571 | 0.507 | 0     |
| LOC729572 | 0.363 | 0     |
| LOC729573 | 0.432 | 0     |
| LOC729574 | 0.51  | 0     |
| LOC729575 | 0.837 | 0.12  |
| LOC729576 | 0.963 | 0.72  |
| LOC729577 | 0.126 | 0.78  |
| LOC729578 | 0.798 | 0     |
| LOC729579 | 0.507 | 3.32  |
| LOC729580 | 1.192 | 28.55 |
| LOC729581 | 1.791 | 0     |
| LOC729582 | 0.579 | 0     |
| LOC729583 | 0.466 | 0     |
| LOC729584 | 1.536 | 0.52  |
| LOC729585 | 0.432 | 0     |
| LOC729586 | 0.765 | 3.88  |
| LOC729587 | 0.531 | 0     |
| LOC729588 | 0.234 | 0     |
| LOC729589 | 0.464 | 0     |
| LOC729590 | 0.846 | 0     |
| LOC729591 | 0.637 | 0     |
| LOC729592 | 0.582 | 0     |
| LOC729593 | 0.543 | 0     |
| LOC729594 | 0.512 | 0     |
| LOC729595 | 0.606 | 0     |
| LOC729596 | 0.576 | 0     |
| LOC729597 | 1.373 | 0     |
| LOC729598 | 0.426 | 0.23  |
| LOC729599 | 1.179 | 0.25  |
| LOC729600 | 0.636 | 0.31  |
| LOC729601 | 0.611 | 0     |
| LOC729602 | 1.119 | 0.53  |
| LOC729603 | 3.131 | 6.92  |
| LOC729604 | 8.124 | 0.19  |
| LOC729605 | 4.638 | 0.02  |
| LOC729606 | 0.561 | 6.88  |
| LOC729607 | 1.041 | 0.1   |
| LOC729608 | 1.507 | 6.37  |
| LOC729609 | 0.567 | 0     |
| LOC729610 | 1.114 | 0.8   |
| LOC729611 | 0.825 | 0.84  |

|           |        |      |
|-----------|--------|------|
| LOC729612 | 0.42   | 0    |
| LOC729613 | 0.837  | 0    |
| LOC729614 | 1.559  | 1.59 |
| LOC729615 | 1.596  | 0    |
| LOC729616 | 1.146  | 1.21 |
| LOC729618 | 1.035  | 0    |
| LOC729619 | 0.597  | 0    |
| LOC729620 | 0.563  | 0    |
| LOC729621 | 0.318  | 0.93 |
| LOC729622 | 0.879  | 0.22 |
| LOC729623 | 0.867  | 0    |
| LOC729624 | 0.747  | 0.66 |
| LOC729625 | 0.975  | 0.3  |
| LOC729626 | 0.54   | 0.55 |
| LOC729627 | 0.801  | 0    |
| LOC729628 | 0.504  | 0    |
| LOC729629 | 0.84   | 1.77 |
| LOC729630 | 1.05   | 0    |
| LOC729631 | 0.984  | 1.1  |
| LOC729632 | 0.813  | 1.34 |
| LOC729633 | 2.655  | 1.49 |
| LOC729634 | 1.348  | 0    |
| LOC729635 | 0.567  | 0    |
| LOC729636 | 0.747  | 0    |
| LOC729637 | 0.593  | 0.84 |
| LOC729638 | 1.287  | 0    |
| LOC729639 | 2.263  | 0    |
| LOC729640 | 0.792  | 1.12 |
| LOC729641 | 1.227  | 0    |
| LOC729642 | 0.734  | 0.13 |
| LOC729643 | 0.798  | 0    |
| LOC729644 | 0.62   | 0.48 |
| LOC729645 | 0.45   | 0    |
| LOC729646 | 6.91   | 6.64 |
| LOC729647 | 15.964 | 0.01 |
| LOC729648 | 7.461  | 0.09 |
| LOC729649 | 0.825  | 0    |
| LOC729650 | 0.366  | 0    |
| LOC729651 | 0.526  | 0    |
| LOC729652 | 3.264  | 0    |
| LOC729653 | 0.593  | 0    |
| LOC729654 | 1.245  | 0    |
| LOC729655 | 61.556 | 0    |
| LOC729656 | 0.576  | 0    |
| LOC729657 | 1.016  | 1.08 |
| LOC729658 | 0.556  | 0    |
| LOC729659 | 0.309  | 0    |
| LOC729660 | 8.351  | 0.74 |
| LOC729661 | 0.432  | 0.69 |
| LOC729663 | 0.871  | 0    |

|           |        |      |
|-----------|--------|------|
| LOC729664 | 0.717  | 0    |
| LOC729665 | 87.38  | 0.01 |
| LOC729666 | 37.964 | 0.08 |
| LOC729667 | 0.711  | 0    |
| LOC729668 | 11.994 | 0.01 |
| LOC729669 | 0.678  | 0    |
| LOC729670 | 0.657  | 0.3  |
| LOC729671 | 1.038  | 0    |
| LOC729672 | 0.802  | 0    |
| LOC729673 | 4.32   | 0.09 |
| LOC729674 | 9.238  | 0.99 |
| LOC729675 | 0.794  | 0.12 |
| LOC729676 | 0.894  | 1.22 |
| LOC729677 | 0.81   | 1.1  |
| LOC729678 | 2.392  | 3.06 |
| LOC729679 | 0.943  | 2.31 |
| LOC729680 | 1.622  | 0.12 |
| LOC729681 | 1.815  | 0    |
| LOC729682 | 5.555  | 0    |
| LOC729683 | 2.086  | 1.66 |
| LOC729684 | 0.471  | 4.2  |
| LOC729685 | 1.11   | 0.8  |
| LOC729686 | 1.276  | 0.16 |
| LOC729687 | 0.379  | 0    |
| LOC729688 | 0.654  | 1.81 |
| LOC729689 | 4.406  | 0    |
| LOC729690 | 0.777  | 0.38 |
| LOC729691 | 1.023  | 0.1  |
| LOC729692 | 0.42   | 3.3  |
| LOC729693 | 0.42   | 0    |
| LOC729694 | 0.597  | 0    |
| LOC729695 | 0.597  | 0    |
| LOC729696 | 2.302  | 0.73 |
| LOC729697 | 0.699  | 0    |
| LOC729698 | 0.597  | 0    |
| LOC729699 | 0.669  | 0    |
| LOC729700 | 0.597  | 0    |
| LOC729701 | 27.201 | 0.05 |
| LOC729702 | 0.633  | 0    |
| LOC729703 | 0.597  | 0    |
| LOC729704 | 0.563  | 0    |
| LOC729705 | 0.561  | 0.7  |
| LOC729706 | 0.597  | 0    |
| LOC729707 | 1.35   | 0    |
| LOC729708 | 1.997  | 4.86 |
| LOC729709 | 0.99   | 0    |
| LOC729710 | 0.935  | 0    |
| LOC729711 | 0.597  | 0    |
| LOC729712 | 0.639  | 0    |
| LOC729713 | 1.509  | 1.25 |

|           |        |       |
|-----------|--------|-------|
| LOC729714 | 0.636  | 0.47  |
| LOC729715 | 0.643  | 0     |
| LOC729716 | 0.105  | 0     |
| LOC729717 | 0.416  | 0     |
| LOC729718 | 0.669  | 0.15  |
| LOC729719 | 0.597  | 0     |
| LOC729720 | 0.714  | 0     |
| LOC729721 | 0.747  | 0     |
| LOC729722 | 0.72   | 0     |
| LOC729723 | 0.549  | 0.54  |
| LOC729724 | 0.597  | 0     |
| LOC729725 | 0.426  | 0     |
| LOC729728 | 0.891  | 0     |
| LOC729729 | 1.284  | 0.08  |
| LOC729730 | 0.798  | 0     |
| LOC729731 | 0.597  | 0     |
| LOC729732 | 0.396  | 0     |
| LOC729733 | 0.699  | 0     |
| LOC729734 | 0.729  | 0     |
| LOC729735 | 0.597  | 0     |
| LOC729736 | 0.498  | 0     |
| LOC729737 | 1.039  | 0     |
| LOC729738 | 0.81   | 0     |
| LOC729739 | 14.03  | 0     |
| LOC729740 | 0.526  | 0     |
| LOC729741 | 1.311  | 0     |
| LOC729742 | 39.389 | 0.01  |
| LOC729743 | 1.225  | 0     |
| LOC729744 | 0.969  | 0     |
| LOC729745 | 0.873  | 0.45  |
| LOC729746 | 0.857  | 0.46  |
| LOC729747 | 1.737  | 0.28  |
| LOC729748 | 1.029  | 1.44  |
| LOC729749 | 0.407  | 6.08  |
| LOC729750 | 0.129  | 13.81 |
| LOC729751 | 2.539  | 15.67 |
| LOC729752 | 0.792  | 0     |
| LOC729753 | 0.516  | 0     |
| LOC729754 | 12.091 | 0     |
| LOC729755 | 0.622  | 0     |
| LOC729756 | 0.765  | 0     |
| LOC729757 | 0.978  | 0     |
| LOC729758 | 0.432  | 0.46  |
| LOC729760 | 0.896  | 0.11  |
| LOC729761 | 0.381  | 0     |
| LOC729762 | 1.242  | 0     |
| LOC729763 | 0.31   | 0     |
| LOC729764 | 10.893 | 0.01  |
| LOC729765 | 0.753  | 0     |
| LOC729766 | 0.78   | 0     |

|           |        |       |
|-----------|--------|-------|
| LOC729767 | 1.197  | 0     |
| LOC729768 | 0.558  | 6.02  |
| LOC729769 | 0.342  | 0     |
| LOC729770 | 1.95   | 0.05  |
| LOC729771 | 0.525  | 0.19  |
| LOC729772 | 0.669  | 0     |
| LOC729773 | 0.472  | 0.21  |
| LOC729774 | 0.718  | 0     |
| LOC729775 | 0.763  | 2.34  |
| LOC729776 | 0.368  | 1.08  |
| LOC729777 | 1.276  | 0.77  |
| LOC729778 | 1.437  | 0     |
| LOC729779 | 1.342  | 0.15  |
| LOC729780 | 0.724  | 0.13  |
| LOC729781 | 0.931  | 0.96  |
| LOC729782 | 0.846  | 0     |
| LOC729783 | 8.574  | 0     |
| LOC729784 | 0.741  | 0.13  |
| LOC729785 | 5.22   | 0.55  |
| LOC729786 | 12.186 | 0     |
| LOC729787 | 1.472  | 0     |
| LOC729788 | 0.645  | 0     |
| LOC729789 | 0.489  | 4.05  |
| LOC729790 | 0.171  | 0     |
| LOC729791 | 0.977  | 0.3   |
| LOC729792 | 4.839  | 0     |
| LOC729793 | 1.04   | 0     |
| LOC729794 | 40.167 | 0.01  |
| LOC729795 | 0.876  | 0.22  |
| LOC729796 | 0.617  | 1.76  |
| LOC729797 | 0.159  | 17.42 |
| LOC729798 | 0.52   | 0.57  |
| LOC729799 | 2.586  | 32.64 |
| LOC729800 | 1.143  | 0     |
| LOC729801 | 0.495  | 0     |
| LOC729802 | 0.306  | 0     |
| LOC729803 | 0.645  | 0.61  |
| LOC729804 | 0.321  | 0     |
| LOC729805 | 0.705  | 0     |
| LOC729806 | 2.272  | 19.29 |
| LOC729807 | 0.522  | 0.19  |
| LOC729808 | 0.906  | 0     |
| LOC729809 | 0.309  | 0     |
| LOC729810 | 2.513  | 3.74  |
| LOC729811 | 1.005  | 0.59  |
| LOC729812 | 0.855  | 0     |
| LOC729813 | 0.522  | 1.32  |
| LOC729814 | 0.598  | 0.33  |
| LOC729815 | 0.93   | 0     |
| LOC729816 | 1.034  | 0     |

|           |         |       |
|-----------|---------|-------|
| LOC729817 | 2.281   | 0.09  |
| LOC729818 | 0.567   | 4.36  |
| LOC729819 | 0.621   | 0     |
| LOC729820 | 0.126   | 0     |
| LOC729821 | 0.777   | 1.65  |
| LOC729822 | 0.977   | 2.74  |
| LOC729823 | 0.939   | 0     |
| LOC729824 | 0.792   | 14.99 |
| LOC729825 | 1.047   | 0     |
| LOC729826 | 3.313   | 3.83  |
| LOC729827 | 0.252   | 0     |
| LOC729828 | 35.27   | 0     |
| LOC729829 | 0.621   | 0     |
| LOC729830 | 106.311 | 0     |
| LOC729831 | 1.335   | 0     |
| LOC729832 | 7.094   | 0.03  |
| LOC729833 | 0.855   | 0     |
| LOC729834 | 0.834   | 0     |
| LOC729835 | 0.331   | 2.69  |
| LOC729837 | 8.856   | 0     |
| LOC729838 | 2.321   | 0     |
| LOC729839 | 1.153   | 0.17  |
| LOC729840 | 1.967   | 0.7   |
| LOC729841 | 0.812   | 0     |
| LOC729842 | 0.845   | 1.17  |
| LOC729843 | 1.216   | 1.71  |
| LOC729844 | 0.471   | 0     |
| LOC729845 | 1.119   | 0     |
| LOC729846 | 0.969   | 0.3   |
| LOC729847 | 0.43    | 0     |
| LOC729848 | 0.752   | 1.32  |
| LOC729849 | 0.444   | 0     |
| LOC729850 | 0.751   | 0     |
| LOC729851 | 0.545   | 0     |
| LOC729852 | 2.02    | 0.39  |
| LOC729853 | 1.502   | 0     |
| LOC729854 | 0.334   | 0     |
| LOC729855 | 0.366   | 0     |
| LOC729856 | 0.765   | 0     |
| LOC729858 | 0.784   | 0     |
| LOC729859 | 1.209   | 1.8   |
| LOC729860 | 2.013   | 2.12  |
| LOC729861 | 0.468   | 0     |
| LOC729862 | 0.39    | 3.81  |
| LOC729863 | 25.392  | 0     |
| LOC729864 | 0.669   | 0     |
| LOC729865 | 1.737   | 0     |
| LOC729867 | 0.547   | 1.08  |
| LOC729868 | 4.689   | 0.17  |
| LOC729869 | 0.255   | 0.39  |



|           |        |       |
|-----------|--------|-------|
| LOC729870 | 1.059  | 0     |
| LOC729871 | 10.324 | 0     |
| LOC729873 | 9.125  | 0     |
| LOC729874 | 1.093  | 4.98  |
| LOC729875 | 1.283  | 0     |
| LOC729877 | 7.886  | 0     |
| LOC729878 | 0.346  | 0.57  |
| LOC729879 | 1.83   | 0.11  |
| LOC729880 | 0.588  | 0     |
| LOC729881 | 0.702  | 0     |
| LOC729882 | 0.687  | 1.15  |
| LOC729883 | 0.492  | 0     |
| LOC729884 | 2.136  | 0     |
| LOC729885 | 0.979  | 0.51  |
| LOC729886 | 1.065  | 0     |
| LOC729887 | 0.952  | 2.19  |
| LOC729888 | 0.894  | 0.44  |
| LOC729889 | 0.543  | 0     |
| LOC729890 | 1.694  | 0     |
| LOC729891 | 0.58   | 0     |
| LOC729892 | 4.028  | 0     |
| LOC729893 | 0.375  | 0     |
| LOC729894 | 41.287 | 0.05  |
| LOC729895 | 0.484  | 0     |
| LOC729896 | 0.366  | 5.13  |
| LOC729897 | 1.637  | 13.66 |
| LOC729898 | 0.411  | 0.48  |
| LOC729899 | 0.363  | 0     |
| LOC729900 | 4.164  | 0.07  |
| LOC729901 | 1.026  | 0     |
| LOC729902 | 0.727  | 0     |
| LOC729903 | 1.582  | 20.08 |
| LOC729904 | 0.681  | 0.14  |
| LOC729905 | 0.438  | 2.71  |
| LOC729906 | 0.329  | 1.2   |
| LOC729907 | 0.694  | 0     |
| LOC729908 | 4.105  | 0     |
| LOC729909 | 0.515  | 0.58  |
| LOC729910 | 0.842  | 0     |
| LOC729911 | 0.528  | 0     |
| LOC729912 | 0.621  | 0     |
| LOC729913 | 1.285  | 2.54  |
| LOC729914 | 0.834  | 0     |
| LOC729915 | 10.37  | 0.12  |
| LOC729916 | 0.444  | 0     |
| LOC729917 | 1.419  | 0.14  |
| LOC729918 | 0.767  | 0     |
| LOC729919 | 0.96   | 0     |
| LOC729920 | 0.849  | 0     |
| LOC729921 | 0.75   | 0     |

|           |        |       |
|-----------|--------|-------|
| LOC729922 | 0.981  | 0     |
| LOC729923 | 0.261  | 0     |
| LOC729924 | 0.393  | 0     |
| LOC729925 | 0.792  | 1.5   |
| LOC729926 | 0.858  | 1.62  |
| LOC729927 | 0.524  | 3.02  |
| LOC729928 | 0.903  | 0     |
| LOC729929 | 0.39   | 0     |
| LOC729930 | 1.08   | 0     |
| LOC729931 | 0.912  | 0     |
| LOC729932 | 0.597  | 0     |
| LOC729933 | 0.396  | 0     |
| LOC729934 | 0.822  | 0.36  |
| LOC729935 | 1.08   | 0     |
| LOC729936 | 17.737 | 0.11  |
| LOC729937 | 0.459  | 0     |
| LOC729938 | 0.726  | 0.68  |
| LOC729939 | 0.345  | 2.87  |
| LOC729940 | 0.643  | 0     |
| LOC729941 | 7.192  | 0.17  |
| LOC729942 | 0.843  | 0     |
| LOC729943 | 0.369  | 0     |
| LOC729944 | 1.643  | 0.12  |
| LOC729945 | 8.025  | 0.3   |
| LOC729946 | 0.527  | 59.13 |
| LOC729947 | 0.621  | 0.32  |
| LOC729948 | 0.258  | 6.52  |
| LOC729949 | 0.471  | 0     |
| LOC729950 | 0.786  | 0     |
| LOC729951 | 0.342  | 0     |
| LOC729952 | 3.202  | 0.09  |
| LOC729953 | 0.498  | 0.2   |
| LOC729954 | 61.643 | 0.18  |
| LOC729955 | 8.85   | 0.13  |
| LOC729956 | 1.554  | 0     |
| LOC729957 | 0.534  | 0     |
| LOC729958 | 0.573  | 0     |
| LOC729959 | 0.876  | 0.12  |
| LOC729960 | 75.604 | 0     |
| LOC729961 | 0.753  | 0     |
| LOC729962 | 12.577 | 0     |
| LOC729963 | 0.477  | 0.83  |
| LOC729964 | 0.81   | 0     |
| LOC729965 | 0.651  | 0     |
| LOC729966 | 0.744  | 0     |
| LOC729967 | 4.675  | 0     |
| LOC729968 | 0.699  | 0     |
| LOC729969 | 0.369  | 8.58  |
| LOC729970 | 0.401  | 0.5   |
| LOC729971 | 0.929  | 0     |

|           |       |         |
|-----------|-------|---------|
| LOC729972 | 0.762 | 0       |
| LOC729973 | 0.743 | 12.25   |
| LOC729974 | 0.902 | 0       |
| LOC729976 | 1.069 | 5.28    |
| LOC729977 | 0.382 | 0       |
| LOC729978 | 1.271 | 0.62    |
| LOC729979 | 0.565 | 0       |
| LOC729980 | 0.708 | 0       |
| LOC729981 | 0.612 | 0       |
| LOC729982 | 0.885 | 0       |
| LOC729983 | 0.888 | 0       |
| LOC729984 | 0.991 | 0.4     |
| LOC729985 | 0.258 | 7.29    |
| LOC729986 | 2.216 | 0       |
| LOC729987 | 0.567 | 0       |
| LOC729988 | 1.066 | 0       |
| LOC729989 | 0.89  | 0.56    |
| LOC729990 | 0.408 | 0       |
| LOC729991 | 0.333 | 2.38    |
| LOC729992 | 0.979 | 0       |
| LOC729993 | 0.671 | 0       |
| LOC729994 | 1.797 | 0.11    |
| LOC729996 | 0.546 | 0       |
| LOC729997 | 7.481 | 0.46    |
| LOC729998 | 1.432 | 1596.67 |
| LOC729999 | 4.738 | 0.07    |
| LOC730000 | 0.315 | 1.57    |
| LOC730001 | 1.873 | 1.32    |
| LOC730002 | 0.548 | 0       |
| LOC730003 | 1.146 | 0       |
| LOC730004 | 0.687 | 3.88    |
| LOC730005 | 1.152 | 0       |
| LOC730006 | 1.32  | 0.6     |
| LOC730007 | 0.446 | 0.67    |
| LOC730008 | 0.846 | 0.23    |
| LOC730009 | 0.753 | 0       |
| LOC730010 | 0.675 | 2.78    |
| LOC730011 | 0.679 | 0       |
| LOC730012 | 0.423 | 0       |
| LOC730013 | 0.795 | 0       |
| LOC730014 | 1.275 | 0       |
| LOC730015 | 2.762 | 0       |
| LOC730016 | 1.551 | 0.51    |
| LOC730017 | 0.509 | 0       |
| LOC730018 | 0.525 | 0       |
| LOC730019 | 0.645 | 0.61    |
| LOC730020 | 2.167 | 0       |
| LOC730021 | 0.762 | 2.2     |
| LOC730022 | 0.789 | 0       |
| LOC730023 | 1.824 | 0       |

|           |        |       |
|-----------|--------|-------|
| LOC730024 | 17.712 | 0     |
| LOC730025 | 0.973  | 0.51  |
| LOC730026 | 0.45   | 0     |
| LOC730027 | 3.585  | 0     |
| LOC730028 | 0.357  | 0     |
| LOC730029 | 1.172  | 5.57  |
| LOC730030 | 0.435  | 4.32  |
| LOC730031 | 1.543  | 0     |
| LOC730032 | 4.171  | 0.03  |
| LOC730033 | 0.45   | 0     |
| LOC730034 | 2.186  | 0     |
| LOC730035 | 3.644  | 0     |
| LOC730036 | 2.479  | 0     |
| LOC730037 | 0.741  | 0     |
| LOC730038 | 1.584  | 0     |
| LOC730039 | 0.183  | 0     |
| LOC730040 | 0.81   | 0.98  |
| LOC730041 | 2.965  | 0.46  |
| LOC730042 | 0.333  | 0     |
| LOC730043 | 21.971 | 0.15  |
| LOC730044 | 0.387  | 0     |
| LOC730045 | 0.516  | 0     |
| LOC730046 | 0.771  | 2.31  |
| LOC730047 | 1.284  | 0     |
| LOC730048 | 0.327  | 1.51  |
| LOC730049 | 0.58   | 0     |
| LOC730050 | 3.503  | 13.98 |
| LOC730051 | 19.925 | 1.03  |
| LOC730052 | 0.688  | 7.91  |
| LOC730053 | 0.524  | 0     |
| LOC730054 | 0.894  | 0     |
| LOC730055 | 0.361  | 0.83  |
| LOC730056 | 1.251  | 1.74  |
| LOC730057 | 0.489  | 0     |
| LOC730058 | 0.429  | 0     |
| LOC730059 | 1.017  | 0     |
| LOC730060 | 1.079  | 1.93  |
| LOC730061 | 10.815 | 2.17  |
| LOC730062 | 1.419  | 5.79  |
| LOC730063 | 0.873  | 0.57  |
| LOC730064 | 1.556  | 2.17  |
| LOC730065 | 0.585  | 0     |
| LOC730066 | 7.747  | 0.1   |
| LOC730068 | 0.678  | 0     |
| LOC730069 | 8.187  | 0.2   |
| LOC730070 | 0.384  | 6.19  |
| LOC730071 | 0.369  | 1.08  |
| LOC730072 | 0.675  | 0     |
| LOC730073 | 0.942  | 0     |
| LOC730074 | 0.474  | 0     |

|           |        |       |
|-----------|--------|-------|
| LOC730075 | 0.513  | 0     |
| LOC730076 | 22.547 | 0     |
| LOC730077 | 0.969  | 0     |
| LOC730078 | 0.839  | 0.71  |
| LOC730079 | 0.384  | 0     |
| LOC730080 | 0.603  | 0.82  |
| LOC730081 | 2.016  | 0.25  |
| LOC730082 | 0.471  | 0     |
| LOC730083 | 1.02   | 0.1   |
| LOC730084 | 0.516  | 0.38  |
| LOC730085 | 0.45   | 0     |
| LOC730086 | 67.249 | 0.02  |
| LOC730087 | 23.24  | 0.21  |
| LOC730088 | 0.528  | 0     |
| LOC730089 | 0.63   | 0     |
| LOC730090 | 1.527  | 0.19  |
| LOC730091 | 0.999  | 0     |
| LOC730092 | 33.969 | 0.46  |
| LOC730093 | 0.594  | 0     |
| LOC730094 | 1.431  | 0.35  |
| LOC730095 | 0.594  | 0.17  |
| LOC730096 | 1.038  | 0.28  |
| LOC730097 | 0.438  | 0     |
| LOC730098 | 0.471  | 0     |
| LOC730099 | 61.001 | 0.3   |
| LOC730100 | 0.563  | 0     |
| LOC730101 | 8.263  | 0.27  |
| LOC730102 | 73.151 | 0.02  |
| LOC730103 | 0.377  | 0     |
| LOC730104 | 0.447  | 0     |
| LOC730105 | 0.541  | 0     |
| LOC730106 | 0.573  | 0.17  |
| LOC730107 | 1.167  | 0.25  |
| LOC730108 | 1.014  | 16.59 |
| LOC730109 | 1.005  | 0     |
| LOC730110 | 1.593  | 1.24  |
| LOC730111 | 0.828  | 27.48 |
| LOC730112 | 0.828  | 0     |
| LOC730113 | 0.804  | 0     |
| LOC730114 | 0.147  | 0     |
| LOC730115 | 1.543  | 3.4   |
| LOC730116 | 1.293  | 0     |
| LOC730117 | 1.131  | 0     |
| LOC730118 | 0.692  | 0     |
| LOC730119 | 0.78   | 1.78  |
| LOC730120 | 0.691  | 0     |
| LOC730121 | 0.555  | 0     |
| LOC730122 | 0.519  | 0     |
| LOC730123 | 1.152  | 0     |
| LOC730124 | 0.705  | 0     |

|           |         |       |
|-----------|---------|-------|
| LOC730125 | 0.534   | 0.56  |
| LOC730126 | 0.414   | 0     |
| LOC730127 | 0.429   | 0     |
| LOC730128 | 0.351   | 0     |
| LOC730129 | 0.621   | 0     |
| LOC730130 | 1.002   | 0     |
| LOC730131 | 2.539   | 0.08  |
| LOC730132 | 2.247   | 0     |
| LOC730133 | 0.301   | 0     |
| LOC730134 | 0.564   | 0     |
| LOC730135 | 0.72    | 0.68  |
| LOC730136 | 0.564   | 19.82 |
| LOC730137 | 0.882   | 0     |
| LOC730138 | 0.489   | 11.53 |
| LOC730139 | 0.953   | 0     |
| LOC730140 | 0.696   | 0     |
| LOC730141 | 0.441   | 0     |
| LOC730142 | 0.75    | 2.51  |
| LOC730143 | 0.627   | 0.32  |
| LOC730144 | 0.867   | 32.07 |
| LOC730145 | 0.491   | 0     |
| LOC730146 | 0.393   | 0     |
| LOC730147 | 0.33    | 0     |
| LOC730148 | 0.426   | 0     |
| LOC730149 | 1.873   | 0     |
| LOC730150 | 0.507   | 0.98  |
| LOC730151 | 0.465   | 3.62  |
| LOC730152 | 4.788   | 0     |
| LOC730153 | 1.24    | 0.56  |
| LOC730154 | 0.135   | 0     |
| LOC730155 | 0.861   | 0     |
| LOC730156 | 0.492   | 0.2   |
| LOC730157 | 0.462   | 0     |
| LOC730158 | 0.384   | 0     |
| LOC730159 | 0.563   | 0     |
| LOC730160 | 2.052   | 0     |
| LOC730161 | 0.629   | 12.43 |
| LOC730162 | 0.363   | 0.82  |
| LOC730163 | 0.583   | 0     |
| LOC730164 | 0.492   | 0     |
| LOC730165 | 0.381   | 0     |
| LOC730166 | 0.495   | 1     |
| LOC730167 | 0.513   | 1.55  |
| LOC730168 | 0.531   | 0     |
| LOC730169 | 0.399   | 1.73  |
| LOC730170 | 0.627   | 0     |
| LOC730171 | 0.492   | 0     |
| LOC730172 | 1.022   | 0     |
| LOC730173 | 1.227   | 0.89  |
| LOC730174 | 121.296 | 0.15  |

|           |       |       |
|-----------|-------|-------|
| LOC730175 | 0.216 | 0     |
| LOC730176 | 1.381 | 0.72  |
| LOC730177 | 0.346 | 1.72  |
| LOC730178 | 0.543 | 0     |
| LOC730179 | 0.852 | 0     |
| LOC730180 | 1.284 | 1.46  |
| LOC730181 | 0.509 | 0     |
| LOC730182 | 0.54  | 3.11  |
| LOC730183 | 0.571 | 4.16  |
| LOC730184 | 0.768 | 0     |
| LOC730185 | 2.2   | 0     |
| LOC730186 | 0.387 | 0     |
| LOC730187 | 0.171 | 1.73  |
| LOC730188 | 0.381 | 0.52  |
| LOC730189 | 0.645 | 0.46  |
| LOC730190 | 0.213 | 5.58  |
| LOC730191 | 0.822 | 0     |
| LOC730192 | 1.14  | 0.78  |
| LOC730193 | 0.531 | 5.78  |
| LOC730194 | 0.92  | 0     |
| LOC730195 | 0.246 | 0     |
| LOC730196 | 1.04  | 0     |
| LOC730197 | 0.339 | 0.29  |
| LOC730198 | 1.074 | 0     |
| LOC730199 | 0.99  | 0.2   |
| LOC730200 | 0.744 | 0     |
| LOC730201 | 2.098 | 0.71  |
| LOC730202 | 1.501 | 0     |
| LOC730203 | 0.555 | 0     |
| LOC730204 | 0.225 | 0     |
| LOC730205 | 0.315 | 0     |
| LOC730206 | 1.008 | 0     |
| LOC730207 | 0.624 | 0     |
| LOC730208 | 0.666 | 0.6   |
| LOC730209 | 0.351 | 1.69  |
| LOC730210 | 0.955 | 0     |
| LOC730211 | 4.676 | 0.02  |
| LOC730212 | 0.351 | 0     |
| LOC730213 | 0.963 | 14.69 |
| LOC730214 | 0.363 | 0     |
| LOC730215 | 1.575 | 0     |
| LOC730216 | 0.777 | 0     |
| LOC730217 | 0.814 | 0     |
| LOC730218 | 0.885 | 0     |
| LOC730219 | 1.204 | 0     |
| LOC730220 | 0.57  | 0     |
| LOC730221 | 0.375 | 0     |
| LOC730222 | 0.681 | 0.14  |
| LOC730223 | 0.438 | 0     |
| LOC730224 | 0.741 | 0     |

|           |        |      |
|-----------|--------|------|
| LOC730225 | 0.648  | 0.61 |
| LOC730226 | 0.715  | 0    |
| LOC730227 | 0.41   | 0    |
| LOC730228 | 1.029  | 0    |
| LOC730229 | 2.116  | 0    |
| LOC730230 | 0.988  | 0    |
| LOC730231 | 0.651  | 0    |
| LOC730232 | 3.661  | 0.24 |
| LOC730233 | 0.906  | 0    |
| LOC730234 | 0.705  | 0.42 |
| LOC730235 | 0.873  | 0.23 |
| LOC730236 | 1.472  | 0    |
| LOC730237 | 0.435  | 0    |
| LOC730238 | 0.531  | 0    |
| LOC730239 | 1.069  | 0.93 |
| LOC730240 | 0.541  | 0.19 |
| LOC730241 | 0.904  | 0.11 |
| LOC730242 | 0.559  | 0    |
| LOC730243 | 0.912  | 0    |
| LOC730244 | 0.441  | 0.22 |
| LOC730245 | 1.698  | 0.29 |
| LOC730246 | 1.311  | 0.83 |
| LOC730247 | 0.474  | 0    |
| LOC730248 | 0.795  | 0.12 |
| LOC730249 | 2.361  | 0    |
| LOC730250 | 0.891  | 0.11 |
| LOC730251 | 0.996  | 0    |
| LOC730252 | 0.912  | 0    |
| LOC730253 | 0.621  | 0    |
| LOC730254 | 2.465  | 1.32 |
| LOC730255 | 0.566  | 1.23 |
| LOC730256 | 8.176  | 0    |
| LOC730257 | 8.141  | 0.08 |
| LOC730258 | 1.861  | 1.7  |
| LOC730259 | 1.091  | 0    |
| LOC730260 | 0.981  | 0    |
| LOC730261 | 0.975  | 0    |
| LOC730262 | 1.143  | 0    |
| LOC730263 | 2.124  | 0    |
| LOC730264 | 1.242  | 0    |
| LOC730265 | 0.594  | 0    |
| LOC730266 | 0.537  | 1.84 |
| LOC730267 | 1.038  | 0.48 |
| LOC730268 | 58.447 | 0.13 |
| LOC730269 | 1.649  | 0    |
| LOC730270 | 1.113  | 0    |
| LOC730271 | 0.564  | 0    |
| LOC730272 | 1.191  | 0.08 |
| LOC730273 | 2.783  | 0    |
| LOC730274 | 0.876  | 0    |



|           |       |      |
|-----------|-------|------|
| LOC730275 | 3.983 | 0    |
| LOC730276 | 0.369 | 0    |
| LOC730277 | 0.429 | 0    |
| LOC730278 | 0.309 | 0    |
| LOC730279 | 0.828 | 0.84 |
| LOC730280 | 0.762 | 0    |
| LOC730281 | 2.025 | 0    |
| LOC730282 | 0.771 | 0    |
| LOC730283 | 0.429 | 0    |
| LOC730284 | 1.857 | 0    |
| LOC730285 | 0.357 | 0    |
| LOC730286 | 0.999 | 0    |
| LOC730287 | 0.958 | 0    |
| LOC730288 | 0.21  | 0    |
| LOC730289 | 0.333 | 0.29 |
| LOC730290 | 1.293 | 0    |
| LOC730291 | 0.57  | 0    |
| LOC730292 | 1.481 | 0.13 |
| LOC730293 | 0.213 | 0    |
| LOC730294 | 0.798 | 0    |
| LOC730295 | 1.988 | 0    |
| LOC730296 | 0.285 | 0    |
| LOC730297 | 0.588 | 0    |
| LOC730298 | 0.456 | 0    |
| LOC730299 | 0.255 | 0    |
| LOC730300 | 0.594 | 0    |
| LOC730301 | 0.246 | 0    |
| LOC730302 | 0.615 | 0    |
| LOC730303 | 3.106 | 0    |
| LOC730304 | 2.271 | 0    |
| LOC730305 | 0.33  | 0    |
| LOC730306 | 0.489 | 1.22 |
| LOC730307 | 2.271 | 0    |
| LOC730308 | 0.129 | 0    |
| LOC730309 | 1.452 | 0.34 |
| LOC730310 | 1.152 | 0    |
| LOC730311 | 1.002 | 0    |
| LOC730312 | 1.613 | 0    |
| LOC730313 | 0.768 | 0    |
| LOC730314 | 0.258 | 0    |
| LOC730315 | 0.33  | 0    |
| LOC730316 | 4.566 | 0.3  |
| LOC730317 | 0.861 | 0    |
| LOC730318 | 0.483 | 0    |
| LOC730319 | 0.492 | 0    |
| LOC730320 | 1.062 | 0.46 |
| LOC730321 | 0.495 | 0    |
| LOC730322 | 0.99  | 1.6  |
| LOC730323 | 1.214 | 0.49 |
| LOC730324 | 0.768 | 0    |

|           |       |      |
|-----------|-------|------|
| LOC730325 | 0.384 | 0    |
| LOC730326 | 0.543 | 0.36 |
| LOC730327 | 0.45  | 0    |
| LOC730328 | 1.107 | 0    |
| LOC730329 | 1.2   | 0    |
| LOC730330 | 0.432 | 0    |
| LOC730331 | 1.135 | 4.8  |
| LOC730332 | 1.849 | 0    |
| LOC730333 | 0.576 | 0    |
| LOC730334 | 0.777 | 0.12 |
| LOC730335 | 0.375 | 0    |
| LOC730336 | 0.897 | 0    |
| LOC730337 | 0.492 | 0    |
| LOC730338 | 1.947 | 0    |
| LOC730339 | 1.069 | 0    |
| LOC730340 | 2.216 | 0.13 |
| LOC730341 | 1.873 | 0.43 |
| LOC730342 | 0.912 | 0.33 |
| LOC730343 | 0.24  | 0    |
| LOC730344 | 2.421 | 0    |
| LOC730345 | 0.549 | 0    |
| LOC730346 | 0.438 | 0    |
| LOC730347 | 5.571 | 0    |
| LOC730348 | 1.405 | 0.49 |
| LOC730349 | 1.662 | 0.12 |
| LOC730350 | 4.765 | 0.02 |
| LOC730351 | 2.315 | 0    |
| LOC730352 | 0.714 | 0.28 |
| LOC730353 | 1.311 | 2.34 |
| LOC730354 | 0.429 | 0    |
| LOC730355 | 0.732 | 0.13 |
| LOC730356 | 0.834 | 0    |
| LOC730357 | 0.774 | 1.66 |
| LOC730358 | 2.02  | 0.2  |
| LOC730359 | 1.694 | 0.06 |
| LOC730360 | 0.849 | 0    |
| LOC730361 | 0.345 | 0    |
| LOC730362 | 0.762 | 0    |
| LOC730363 | 0.546 | 0.18 |
| LOC730364 | 0.282 | 0    |
| LOC730365 | 0.81  | 0    |
| LOC730366 | 0.357 | 0    |
| LOC730367 | 1.059 | 0.1  |
| LOC730368 | 0.363 | 0    |
| LOC730369 | 1.131 | 0    |
| LOC730370 | 1.689 | 0    |
| LOC730371 | 0.492 | 0    |
| LOC730372 | 1.14  | 0.09 |
| LOC730373 | 0.246 | 0    |
| LOC730374 | 0.648 | 2.75 |

|           |        |       |
|-----------|--------|-------|
| LOC730375 | 0.705  | 0     |
| LOC730376 | 0.873  | 0     |
| LOC730377 | 0.444  | 0     |
| LOC730378 | 0.9    | 0     |
| LOC730379 | 0.444  | 0     |
| LOC730380 | 0.444  | 0     |
| LOC730381 | 0.519  | 0     |
| LOC730382 | 0.486  | 0     |
| LOC730383 | 0.39   | 0     |
| LOC730384 | 0.681  | 0     |
| LOC730385 | 0.681  | 0     |
| LOC730386 | 0.681  | 0     |
| LOC730387 | 0.681  | 0     |
| LOC730388 | 0.681  | 0     |
| LOC730389 | 1.152  | 0     |
| LOC730390 | 0.817  | 0     |
| LOC730391 | 0.981  | 0     |
| LOC730392 | 13.677 | 0     |
| LOC730393 | 0.585  | 0     |
| LOC730394 | 4.558  | 0     |
| LOC730395 | 0.566  | 0     |
| LOC730397 | 0.593  | 0     |
| LOC730398 | 0.201  | 0     |
| LOC730399 | 5.046  | 0     |
| LOC730400 | 0.645  | 0     |
| LOC730401 | 4.566  | 0     |
| LOC730402 | 1.054  | 0     |
| LOC730403 | 0.566  | 0     |
| LOC730404 | 0.662  | 0     |
| LOC730405 | 0.466  | 0     |
| LOC730406 | 0.593  | 0     |
| LOC730407 | 1.437  | 0.07  |
| LOC730408 | 0.645  | 0     |
| LOC730409 | 4.566  | 0     |
| LOC730410 | 1.853  | 0     |
| LOC732478 | 1.347  | 0     |
| LOC79984  | 3.889  | 0.15  |
| LOC80098  | 2.046  | 0     |
| LOC81625  | 1.938  | 7.15  |
| LOC81691  | 2.707  | 0.55  |
| LOC83459  | 0.751  | 0.53  |
| LOC84661  | 0.8    | 3.96  |
| LOC85389  | 0.211  | 8.44  |
| LOC85390  | 0.228  | 5.64  |
| LOC86123  | 1.52   | 0.2   |
| LOC89944  | 3.117  | 0.35  |
| LOC90113  | 4.155  | 0.21  |
| LOC90120  | 2.799  | 0.88  |
| LOC90342  | 6.872  | 0     |
| LOC90379  | 2.258  | 19.32 |

|           |        |       |
|-----------|--------|-------|
| LOC90499  | 0.385  | 0     |
| LOC90586  | 2.073  | 0     |
| LOC90826  | 2.83   | 3.53  |
| LOC90835  | 1.829  | 1.03  |
| LOC91219  | 0.501  | 0.79  |
| LOC91431  | 3.113  | 1.65  |
| LOC91461  | 1.881  | 0     |
| LOC91664  | 3.985  | 1.59  |
| LOC92017  | 4.724  | 11.27 |
| LOC92196  | 0.532  | 0     |
| LOC92270  | 0.758  | 0.39  |
| LOC92312  | 5.917  | 0.17  |
| LOC92345  | 1.907  | 5.6   |
| LOC92755  | 1.516  | 4.77  |
| LOC93202  | 1.21   | 0.08  |
| LOC93349  | 3.588  | 11.03 |
| LOC93432  | 3.068  | 0     |
| LOC93622  | 2.052  | 4.92  |
| LOC96597  | 1.629  | 0.06  |
| LOC96610  | 0.702  | 10.15 |
| LOH11CR2A | 4.022  | 0.03  |
| LOH12CR1  | 2.05   | 0.68  |
| LOH3CR2A  | 1.686  | 0.18  |
| LONP1     | 3.111  | 14.19 |
| LONP2     | 4.764  | 8.35  |
| LONRF1    | 3.584  | 3.54  |
| LONRF2    | 2.363  | 0     |
| LONRF3    | 2.608  | 0.12  |
| LOR       | 1.206  | 0     |
| LOX       | 1.947  | 0.1   |
| LOXHD1    | 4.775  | 0.02  |
| LOXL1     | 2.361  | 4.44  |
| LOXL2     | 3.81   | 4.26  |
| LOXL3     | 3.121  | 0.69  |
| LOXL4     | 3.657  | 0.41  |
| LPA       | 6.065  | 0.02  |
| LPAL2     | 2.25   | 0.04  |
| LPGAT1    | 6.252  | 4.42  |
| LPHN1     | 7.857  | 5.99  |
| LPHN2     | 5.706  | 0     |
| LPHN3     | 6.177  | 0     |
| LPIN1     | 6.117  | 24.7  |
| LPIN2     | 6.229  | 7.53  |
| LPIN3     | 4.363  | 1.11  |
| LPL       | 3.55   | 0.86  |
| LPO       | 2.918  | 0.04  |
| LPP       | 10.741 | 9.1   |
| LPPR2     | 2.678  | 1.63  |
| LPPR4     | 4.972  | 0     |
| LPXN      | 1.833  | 2.76  |

|        |        |       |
|--------|--------|-------|
| LRAP   | 4.226  | 9.65  |
| LRAT   | 4.888  | 0     |
| LRBA   | 9.899  | 2.57  |
| LRCH1  | 7.774  | 25.88 |
| LRCH2  | 4.931  | 0     |
| LRCH3  | 2.258  | 2.41  |
| LRCH4  | 6.974  | 41.14 |
| LRDD   | 4.094  | 8.19  |
| LRFN1  | 3.381  | 1.29  |
| LRFN2  | 3.144  | 1.2   |
| LRFN3  | 2.515  | 0     |
| LRFN4  | 2.431  | 3.01  |
| LRFN5  | 3.153  | 0     |
| LRG1   | 1.78   | 0.89  |
| LRGUK  | 5.4    | 0.14  |
| LRIG1  | 6.99   | 14.12 |
| LRIG2  | 4.015  | 7.57  |
| LRIG3  | 4.023  | 0     |
| LRMP   | 2.809  | 23.74 |
| LRP1   | 14.897 | 0.47  |
| LRP10  | 3.252  | 20.08 |
| LRP11  | 3.58   | 0.47  |
| LRP12  | 4.06   | 0.17  |
| LRP16  | 1.19   | 4.49  |
| LRP1B  | 16.531 | 0     |
| LRP2   | 14.385 | 0     |
| LRP2BP | 5.157  | 0.02  |
| LRP3   | 2.577  | 2.61  |
| LRP4   | 8.076  | 0.01  |
| LRP5   | 5.099  | 9.54  |
| LRP5L  | 8.835  | 49.47 |
| LRP6   | 5.293  | 1.44  |
| LRP8   | 6.222  | 1.11  |
| LRPAP1 | 1.484  | 18    |
| LRPPRC | 5.095  | 12.51 |
| LRRC1  | 3.465  | 0.03  |
| LRRC10 | 2.599  | 0     |
| LRRC14 | 5.323  | 2.52  |
| LRRC15 | 5.938  | 0     |
| LRRC16 | 5.175  | 0     |
| LRRC17 | 5.726  | 0.03  |
| LRRC18 | 1.62   | 0     |
| LRRC19 | 3.136  | 0     |
| LRRC2  | 5.669  | 0     |
| LRRC20 | 3.236  | 0     |
| LRRC21 | 2.099  | 0     |
| LRRC22 | 3.128  | 0     |
| LRRC23 | 1.925  | 1.39  |
| LRRC24 | 1.753  | 1.87  |
| LRRC25 | 2.403  | 1.81  |

|          |        |       |
|----------|--------|-------|
| LRRC27   | 6.374  | 0.14  |
| LRRC28   | 1.45   | 2.87  |
| LRRC29   | 1.493  | 0.79  |
| LRRC3    | 2.505  | 0.87  |
| LRRC30   | 0.906  | 0     |
| LRRC31   | 2.355  | 0     |
| LRRC32   | 4.157  | 0.6   |
| LRRC33   | 2.715  | 41.84 |
| LRRC34   | 1.437  | 0.35  |
| LRRC36   | 2.396  | 0.08  |
| LRRC37A  | 5.177  | 1.83  |
| LRRC37A2 | 3.594  | 7.43  |
| LRRC37A3 | 5.665  | 0.89  |
| LRRC37B  | 3.027  | 5.85  |
| LRRC38   | 2.28   | 0.21  |
| LRRC39   | 1.394  | 0.28  |
| LRRC3B   | 1.693  | 0.59  |
| LRRC4    | 7.414  | 0.75  |
| LRRC40   | 2.847  | 4.76  |
| LRRC41   | 2.948  | 10.24 |
| LRRC42   | 1.714  | 2.25  |
| LRRC43   | 2.293  | 0.13  |
| LRRC44   | 1.591  | 0     |
| LRRC45   | 2.599  | 0.76  |
| LRRC46   | 1.429  | 0.97  |
| LRRC47   | 2.648  | 8.37  |
| LRRC48   | 1.978  | 0.85  |
| LRRC49   | 2.793  | 0     |
| LRRC4B   | 2.958  | 0.47  |
| LRRC4C   | 4.054  | 0     |
| LRRC50   | 2.379  | 0     |
| LRRC51   | 2.12   | 0.33  |
| LRRC52   | 1.369  | 0     |
| LRRC55   | 3.797  | 0     |
| LRRC56   | 2.769  | 0.75  |
| LRRC57   | 2.647  | 12.52 |
| LRRC58   | 8.099  | 1.47  |
| LRRC59   | 2.828  | 11.23 |
| LRRC6    | 1.582  | 0.25  |
| LRRC61   | 2.956  | 0.2   |
| LRRC62   | 7.579  | 2.15  |
| LRRC7    | 5      | 0     |
| LRRC8A   | 4.296  | 5.99  |
| LRRC8B   | 3.882  | 5.15  |
| LRRC8C   | 4.749  | 65.37 |
| LRRC8D   | 3.312  | 2.9   |
| LRRC8E   | 3.601  | 0     |
| LRRC1    | 3.24   | 0.49  |
| LRRFIP1  | 17.947 | 42.27 |
| LRRFIP2  | 3.283  | 6.96  |

|           |       |       |
|-----------|-------|-------|
| LRRIQ1    | 4.457 | 0     |
| LRRIQ2    | 4.411 | 0.44  |
| LRRK1     | 7.631 | 3.5   |
| LRRK2     | 9.224 | 0.01  |
| LRRN1     | 3.307 | 0     |
| LRRN2     | 3.358 | 1.71  |
| LRRN3     | 6.74  | 0     |
| LRRTM1    | 2.212 | 0     |
| LRRTM2    | 5.58  | 0.07  |
| LRRTM3    | 3.787 | 0     |
| LRRTM4    | 3.616 | 0     |
| LRSAM1    | 3.509 | 2.23  |
| LRTM1     | 1.298 | 0     |
| LRTM2     | 3.688 | 0.03  |
| LSAMP     | 1.539 | 0     |
| LSDP5     | 1.888 | 0.36  |
| LSG1      | 3.271 | 15.58 |
| LSM1      | 0.921 | 9.46  |
| LSM10     | 0.85  | 5.24  |
| LSM11     | 2.561 | 0.04  |
| LSM12     | 2.21  | 3     |
| LSM14A    | 3.384 | 29.88 |
| LSM14B    | 1.604 | 8.02  |
| LSM2      | 2.574 | 0     |
| LSM3      | 0.555 | 24.95 |
| LSM4      | 1.109 | 18.65 |
| LSM5      | 1.464 | 3.32  |
| LSM6      | 0.579 | 7.69  |
| LSM7      | 0.776 | 84.53 |
| LSM8      | 2.614 | 7.68  |
| LSMD1     | 0.999 | 18.82 |
| LSP1      | 2.745 | 20.69 |
| LSR       | 2.278 | 4.12  |
| LSS       | 4.624 | 3.92  |
| LST1      | 4.947 | 0     |
| LST-3TM12 | 2.119 | 0     |
| LTA       | 4.158 | 0.05  |
| LTA4H     | 2.06  | 27.14 |
| LTB       | 4.5   | 0     |
| LTB4DH    | 1.242 | 5.1   |
| LTB4R     | 3.02  | 20.15 |
| LTB4R2    | 3.597 | 5.77  |
| LTBP1     | 6.484 | 0.04  |
| LTBP2     | 8.554 | 0.11  |
| LTBP3     | 4.601 | 24.65 |
| LTBP4     | 5.031 | 2.68  |
| LTBR      | 2.105 | 5.59  |
| LTC4S     | 0.667 | 0.74  |
| LTF       | 2.361 | 20.08 |
| LTK       | 3.119 | 2.03  |

|          |        |       |
|----------|--------|-------|
| LTV1     | 1.814  | 12    |
| LUC7L    | 2.777  | 12.75 |
| LUC7L2   | 9.766  | 34.51 |
| LUM      | 2.116  | 0     |
| LUZP1    | 7.539  | 19.23 |
| LUZP2    | 5.257  | 0.17  |
| LUZP4    | 1.728  | 0     |
| LXN      | 1.113  | 3.2   |
| LY6D     | 0.802  | 0     |
| LY6E     | 1.15   | 50.5  |
| LY6G5B   | 2.322  | 0.13  |
| LY6G5C   | 5.259  | 0     |
| LY6G6C   | 2.64   | 0     |
| LY6G6D   | 1.206  | 0     |
| LY6G6E   | 1.152  | 0     |
| LY6H     | 0.947  | 10.86 |
| LY6K     | 1.735  | 0.12  |
| LY75     | 6.906  | 0.8   |
| LY86     | 2.649  | 9.34  |
| LY9      | 3.366  | 0.5   |
| LY96     | 0.587  | 0.84  |
| LYAR     | 1.508  | 0.92  |
| LYCAT    | 5.342  | 0.54  |
| LYG2     | 0.87   | 0.45  |
| LYK5     | 4.162  | 8.18  |
| LYL1     | 1.49   | 21.52 |
| LYN      | 2.297  | 6.55  |
| LYNX1    | 6.328  | 0.02  |
| LYPD1    | 1.891  | 0     |
| LYPD2    | 0.534  | 0     |
| LYPD3    | 1.706  | 0     |
| LYPD4    | 1.792  | 0.11  |
| LYPD5    | 3.616  | 0.03  |
| LYPD6    | 3.485  | 0     |
| LYPLA1   | 2.574  | 6.42  |
| LYPLA2   | 1.624  | 5.36  |
| LYPLA2P1 | 2.429  | 0     |
| LYPLA3   | 2.723  | 10.65 |
| LYPLAL1  | 0.816  | 8.85  |
| LYRM1    | 1.659  | 2.44  |
| LYRM2    | 0.873  | 4.2   |
| LYRM4    | 1.482  | 14.35 |
| LYRM5    | 1.06   | 3.83  |
| LYRM7    | 6.213  | 0.7   |
| LYSMD1   | 2.42   | 1.72  |
| LYSMD2   | 1.688  | 0.59  |
| LYSMD3   | 4.261  | 2.09  |
| LYSMD4   | 2.885  | 9.6   |
| LYST     | 14.528 | 1.13  |
| LYZ      | 1.486  | 28.63 |



|          |        |       |
|----------|--------|-------|
| LYZL1    | 0.812  | 0     |
| LYZL2    | 0.774  | 0     |
| LYZL4    | 0.872  | 0     |
| LYZL6    | 0.872  | 0     |
| LZIC     | 1.407  | 2.81  |
| LZTFL1   | 3.398  | 0.64  |
| LZTR1    | 4.217  | 9.67  |
| LZTR2    | 3.985  | 0     |
| LZTS1    | 5.459  | 0.12  |
| LZTS2    | 2.9    | 25.69 |
| M6PR     | 2.454  | 18.9  |
| M6PRBP1  | 2.236  | 13.8  |
| MAB21L1  | 2.449  | 0.04  |
| MAB21L2  | 2.543  | 0     |
| MACF1    | 24.449 | 8.19  |
| MAD1L1   | 8.552  | 13.25 |
| MAD2L1   | 1.376  | 2.01  |
| MAD2L1BP | 1.63   | 9.41  |
| MAD2L1P  | 1.285  | 0.23  |
| MAD2L2   | 1.041  | 13.69 |
| MADCAM1  | 1.536  | 0     |
| MADD     | 10.221 | 16.51 |
| MAEA     | 2.414  | 14.59 |
| MAEL     | 1.731  | 0     |
| MAF      | 7.719  | 1.76  |
| MAF1     | 1.762  | 47.95 |
| MAFA     | 1.062  | 0     |
| MAFB     | 3.362  | 1.86  |
| MAFF     | 2.549  | 29.15 |
| MAFG     | 5.218  | 6.39  |
| MAFK     | 6.913  | 24.47 |
| MAG      | 2.94   | 0     |
| MAG1     | 2.534  | 1.6   |
| MAGEA1   | 1.676  | 0     |
| MAGEA10  | 1.61   | 0     |
| MAGEA11  | 2.083  | 0     |
| MAGEA12  | 1.652  | 0     |
| MAGEA2   | 2.291  | 0     |
| MAGEA2B  | 1.617  | 0     |
| MAGEA3   | 1.724  | 0     |
| MAGEA4   | 1.955  | 0     |
| MAGEA5   | 1.692  | 0     |
| MAGEA6   | 1.828  | 0     |
| MAGEA7   | 0.278  | 0     |
| MAGEA8   | 1.777  | 0     |
| MAGEA9   | 1.807  | 0     |
| MAGEB1   | 1.968  | 0     |
| MAGEB10  | 1.567  | 0     |
| MAGEB18  | 1.811  | 0     |
| MAGEB2   | 1.607  | 0     |

|         |        |        |
|---------|--------|--------|
| MAGEB3  | 2.303  | 0      |
| MAGEB4  | 2.142  | 0      |
| MAGEB5  | 1.111  | 0      |
| MAGEB6  | 1.949  | 0      |
| MAGEB6B | 1.224  | 0      |
| MAGEC1  | 4.279  | 0      |
| MAGEC2  | 1.992  | 0      |
| MAGEC3  | 3.5    | 0      |
| MAGED1  | 2.971  | 15.18  |
| MAGED2  | 2.289  | 10.59  |
| MAGED4  | 3.258  | 2.64   |
| MAGEE1  | 3.628  | 0.13   |
| MAGEE2  | 2.249  | 0      |
| MAGEF1  | 1.682  | 4.29   |
| MAGEH1  | 1.462  | 1.69   |
| MAGEL2  | 2.295  | 0      |
| MAGI1   | 12.411 | 1.04   |
| MAGI2   | 14.115 | 0.48   |
| MAGI3   | 3.947  | 1.38   |
| Magmas  | 0.511  | 5.03   |
| MAGOH   | 0.681  | 28.19  |
| MAGOHP  | 1.071  | 0.37   |
| MAK     | 3.83   | 0.28   |
| MAK10   | 2.649  | 2.58   |
| MAL     | 1.056  | 0.37   |
| MAL2    | 2.796  | 0      |
| MALAT1  | 8.356  | 160.03 |
| MALL    | 2.566  | 0      |
| MALT1   | 5.029  | 3.21   |
| MAMDC1  | 4.727  | 0      |
| MAMDC2  | 3.595  | 0      |
| MAMDC4  | 3.658  | 0.62   |
| MAML1   | 5.975  | 11.34  |
| MAML2   | 5.428  | 3.4    |
| MAML3   | 7.101  | 6.88   |
| MAN1A1  | 4.122  | 18     |
| MAN1A2  | 5.388  | 2.33   |
| MAN1B1  | 2.769  | 8.72   |
| MAN1C1  | 2.884  | 2.71   |
| MAN2A1  | 5.128  | 1.48   |
| MAN2A2  | 6.269  | 16.02  |
| MAN2B1  | 3.461  | 23.64  |
| MAN2B2  | 4.242  | 3.06   |
| MAN2C1  | 4.423  | 32.61  |
| MANBA   | 3.311  | 11.41  |
| MANBAL  | 1.315  | 4.14   |
| MANEA   | 4.574  | 0.13   |
| MANEAL  | 4.449  | 0.16   |
| MANSC1  | 2.297  | 0      |
| MAOA    | 4.073  | 0      |

|           |        |       |
|-----------|--------|-------|
| MAOB      | 2.555  | 0     |
| MAP1A     | 10.244 | 0.6   |
| MAP1B     | 9.893  | 0     |
| MAP1D     | 1.534  | 1.74  |
| MAP1LC3A  | 1.121  | 6.18  |
| MAP1LC3B  | 2.492  | 97.62 |
| MAP1LC3C  | 1.182  | 0     |
| MAP1LC3P  | 0.625  | 0     |
| MAP1S     | 3.276  | 4.28  |
| MAP2      | 9.989  | 0     |
| MAP2K1    | 2.172  | 21.91 |
| MAP2K1IP1 | 1.411  | 13.32 |
| MAP2K1P1  | 0.19   | 0     |
| MAP2K2    | 1.734  | 36.63 |
| MAP2K3    | 3.352  | 11.04 |
| MAP2K4    | 3.743  | 3.62  |
| MAP2K5    | 2.364  | 3.89  |
| MAP2K6    | 1.869  | 0.05  |
| MAP2K7    | 3.372  | 11.3  |
| MAP3K1    | 7.719  | 3.25  |
| MAP3K10   | 3.428  | 1.09  |
| MAP3K11   | 3.573  | 11.82 |
| MAP3K12   | 3.865  | 7.22  |
| MAP3K13   | 3.557  | 0.14  |
| MAP3K14   | 4.582  | 2.81  |
| MAP3K15   | 4.697  | 0.52  |
| MAP3K2    | 6.562  | 9.83  |
| MAP3K3    | 5.701  | 37.76 |
| MAP3K4    | 5.484  | 2.85  |
| MAP3K5    | 5.195  | 1.58  |
| MAP3K6    | 4.328  | 2.04  |
| MAP3K7    | 4.203  | 3.37  |
| MAP3K7IP1 | 3.862  | 4.04  |
| MAP3K7IP2 | 4.152  | 37.46 |
| MAP3K7IP3 | 3.782  | 3.77  |
| MAP3K8    | 3.534  | 6.99  |
| MAP3K9    | 5.602  | 0.11  |
| MAP4      | 10.375 | 8.81  |
| MAP4K1    | 2.692  | 9.96  |
| MAP4K2    | 3.631  | 26.95 |
| MAP4K3    | 5.202  | 16.97 |
| MAP4K4    | 7.762  | 25.86 |
| MAP4K5    | 4.614  | 15.39 |
| MAP6      | 5.793  | 0     |
| MAP6D1    | 2.104  | 0.1   |
| MAP7      | 3.99   | 0.03  |
| MAP7D1    | 3.324  | 39.23 |
| MAP7D2    | 3.532  | 0.12  |
| MAP7D3    | 4.528  | 2.12  |
| MAP9      | 7.333  | 0     |

|          |       |       |
|----------|-------|-------|
| MAPBPIP  | 0.591 | 7.54  |
| MAPK1    | 6.09  | 15.72 |
| MAPK10   | 4.569 | 0.04  |
| MAPK11   | 2.388 | 6.46  |
| MAPK12   | 1.754 | 1.08  |
| MAPK13   | 2.171 | 6.06  |
| MAPK14   | 6.898 | 13.23 |
| MAPK15   | 2.24  | 0     |
| MAPK3    | 2.244 | 12.21 |
| MAPK4    | 4.736 | 0     |
| MAPK6    | 4.189 | 3.47  |
| MAPK6PS1 | 5.207 | 0.06  |
| MAPK6PS2 | 4.007 | 0     |
| MAPK6PS3 | 4.145 | 0.14  |
| MAPK6PS4 | 4.049 | 0.05  |
| MAPK6PS5 | 2.114 | 0.14  |
| MAPK6PS6 | 3.332 | 0.06  |
| MAPK7    | 4.378 | 9.49  |
| MAPK8    | 2.607 | 10.32 |
| MAPK8IP1 | 3.05  | 0.23  |
| MAPK8IP2 | 4.178 | 0     |
| MAPK8IP3 | 8.412 | 43.14 |
| MAPK9    | 2.744 | 3.46  |
| MAPKAP1  | 3.866 | 4.02  |
| MAPKAPK2 | 5.572 | 32.01 |
| MAPKAPK3 | 2.5   | 11.2  |
| MAPKAPK5 | 2.16  | 11.63 |
| MAPKBP1  | 9.647 | 50.38 |
| MAPRE1   | 2.543 | 39.38 |
| MAPRE2   | 2.579 | 19.64 |
| MAPRE3   | 1.87  | 0.21  |
| MAPT     | 6.682 | 0.02  |
| MARCH1   | 1.79  | 0.72  |
| MARCH2   | 1.653 | 10    |
| MARCH3   | 1.803 | 3.73  |
| MARCH4   | 4.446 | 0.03  |
| MARCH5   | 3.926 | 15.53 |
| MARCH6   | 6.451 | 39.02 |
| MARCH7   | 3.468 | 13.09 |
| MARCH8   | 4.921 | 15.18 |
| MARCH9   | 2.462 | 0.8   |
| MARCKS   | 2.59  | 0.95  |
| MARCKSL1 | 1.535 | 12.51 |
| MARCO    | 1.835 | 0.16  |
| MARK1    | 4.638 | 0     |
| MARK2    | 4.356 | 4     |
| MARK3    | 3.39  | 12.35 |
| MARK4    | 4.917 | 2.9   |
| MARS     | 2.97  | 26.55 |
| MARS2    | 3.028 | 0.62  |

|          |       |       |
|----------|-------|-------|
| MARVELD1 | 3.217 | 5.35  |
| MARVELD2 | 6.667 | 0     |
| MARVELD3 | 3.384 | 0     |
| MAS1     | 1.135 | 0     |
| MAS1L    | 3.411 | 0     |
| MASK-BP3 | 8.319 | 8.69  |
| MASP1    | 7.405 | 0     |
| MASP2    | 3.023 | 6.15  |
| MAST1    | 4.833 | 0     |
| MAST2    | 5.738 | 3.03  |
| MAST3    | 5.896 | 3.17  |
| MASTL    | 3.084 | 3.75  |
| MAT1A    | 3.404 | 0.03  |
| MAT2A    | 3.014 | 17.04 |
| MAT2B    | 2.272 | 10.67 |
| MATE2    | 2.235 | 0     |
| MATK     | 2.61  | 2.88  |
| MATN1    | 2.413 | 0.45  |
| MATN2    | 4.188 | 0.07  |
| MATN3    | 2.919 | 5.32  |
| MATN4    | 2.075 | 0     |
| MATR3    | 4.157 | 71.54 |
| MAX      | 5.664 | 22.06 |
| MAZ      | 2.785 | 79.29 |
| MB       | 1.397 | 0.07  |
| MBD1     | 4.904 | 13.31 |
| MBD2     | 3.01  | 7.76  |
| MBD3     | 2.559 | 8.04  |
| MBD3L1   | 0.664 | 0     |
| MBD3L2   | 0.777 | 0     |
| MBD4     | 2.973 | 7.99  |
| MBD5     | 5.311 | 0.88  |
| MBD6     | 4.15  | 15.09 |
| MBIP     | 1.605 | 5.42  |
| MBL1P1   | 4.366 | 0     |
| MBL2     | 3.569 | 0     |
| MBNL1    | 10.27 | 13.45 |
| MBNL2    | 8.064 | 8.76  |
| MBNL3    | 3.255 | 2.01  |
| MBOAT1   | 3.275 | 5.29  |
| MBOAT2   | 3.804 | 2.65  |
| MBOAT4   | 1.283 | 0.15  |
| MBOAT5   | 2.297 | 5.26  |
| MBP      | 9.634 | 3.03  |
| MBTD1    | 2.564 | 3.4   |
| MBTPS1   | 6.526 | 11.66 |
| MBTPS2   | 1.759 | 1.18  |
| MC1R     | 2.36  | 2.73  |
| MC2R     | 3.652 | 0     |
| MC3R     | 1.083 | 0     |

|          |       |       |
|----------|-------|-------|
| MC4R     | 0.999 | 0     |
| MC5R     | 0.978 | 0     |
| MCAM     | 3.332 | 18.68 |
| MCART1   | 1.397 | 0.43  |
| MCART2   | 1.041 | 0     |
| MCART6   | 6.224 | 0.38  |
| MCAT     | 1.981 | 1.4   |
| MCC      | 4.18  | 0     |
| MCCC1    | 2.528 | 7.12  |
| MCCC2    | 4.658 | 1.25  |
| MCCD1    | 2.127 | 0     |
| MCEE     | 0.822 | 0.36  |
| MCF2     | 3.654 | 0.13  |
| MCF2L    | 3.413 | 2.64  |
| MCF2L2   | 4.772 | 0.04  |
| MCFD2    | 4.124 | 9.72  |
| MCHR1    | 2.423 | 0     |
| MCHR2    | 2.607 | 0     |
| MCL1     | 6.934 | 51.5  |
| MCM10    | 4.661 | 0.29  |
| MCM2     | 3.435 | 9.5   |
| MCM3     | 3.111 | 6.55  |
| MCM3AP   | 6.113 | 8.09  |
| MCM3APAS | 2.314 | 1.11  |
| MCM4     | 3.628 | 4.75  |
| MCM5     | 2.534 | 16.56 |
| MCM6     | 3.751 | 3.22  |
| MCM7     | 7.494 | 6.91  |
| MCM8     | 4.27  | 0.7   |
| MCMDC1   | 2.442 | 0.97  |
| MCOLN1   | 2.051 | 1.79  |
| MCOLN2   | 3.044 | 0.43  |
| MCOLN3   | 2.796 | 0     |
| MCPH1    | 2.518 | 6.13  |
| MCRS1    | 1.97  | 9.44  |
| MCTP1    | 3.057 | 0.87  |
| MCTP2    | 2.637 | 0.41  |
| MCTS1    | 0.926 | 5.56  |
| MDAC1    | 0.593 | 0     |
| MDC1     | 20.82 | 0.08  |
| MDFI     | 1.558 | 1.15  |
| MDFIC    | 9.2   | 1.01  |
| MDGA1    | 8.907 | 0.04  |
| MDH1     | 1.268 | 17.94 |
| MDH1B    | 2.332 | 0     |
| MDH2     | 2.925 | 17.63 |
| MDK      | 1.208 | 9.01  |
| MDM1     | 4.879 | 0.51  |
| MDM2     | 6.803 | 37.06 |
| MDM4     | 4.666 | 34.86 |

|         |        |       |
|---------|--------|-------|
| MDN1    | 17.4   | 3.2   |
| MDP-1   | 0.683  | 4.35  |
| MDS032  | 0.843  | 10.68 |
| MDS1    | 1.286  | 0     |
| ME1     | 2.212  | 0.04  |
| ME2     | 2.717  | 3.24  |
| ME3     | 2.342  | 10.99 |
| MEA1    | 0.868  | 14.82 |
| MECP2   | 11.364 | 8.99  |
| MECR    | 2.744  | 1.33  |
| MED10   | 1.281  | 25.18 |
| MED11   | 0.83   | 2.14  |
| MED12   | 6.645  | 7.64  |
| MED12L  | 7.694  | 0.09  |
| MED18   | 1.831  | 1.35  |
| MED19   | 1.515  | 3.2   |
| MED25   | 2.68   | 14.03 |
| MED28   | 1.966  | 21.54 |
| MED31   | 1.196  | 0.75  |
| MED4    | 2.022  | 19.04 |
| MED6    | 1.344  | 12.37 |
| MED8    | 3.496  | 2.35  |
| MED9    | 2.222  | 9.22  |
| MEF2A   | 4.557  | 19.24 |
| MEF2B   | 1.665  | 3.56  |
| MEF2C   | 9.25   | 35.03 |
| MEF2D   | 5.874  | 57.99 |
| MEFV    | 3.499  | 0.36  |
| MEG3    | 1.582  | 0.25  |
| MEGF10  | 7.524  | 0     |
| MEGF11  | 5.702  | 0.33  |
| MEGF6   | 7.526  | 19.6  |
| MEGF8   | 8.306  | 1.05  |
| MEGF9   | 6.297  | 3.02  |
| MEIG1   | 0.516  | 0     |
| MEIS1   | 3.181  | 0.03  |
| MEIS2   | 7.002  | 0     |
| MEIS3   | 2.764  | 0     |
| MEIS3P1 | 2.856  | 1.35  |
| MEIS3P2 | 1.888  | 0     |
| MELK    | 2.439  | 0.57  |
| MEMO1   | 0.1    | 48.48 |
| MEN1    | 4.617  | 3.71  |
| MEOX1   | 4.311  | 0     |
| MEOX2   | 4.743  | 0     |
| MEP1A   | 2.892  | 0     |
| MEP1B   | 2.308  | 0     |
| MEPE    | 1.964  | 0     |
| MERTK   | 3.626  | 4.09  |
| MESDC1  | 2.373  | 11.38 |

|          |        |       |
|----------|--------|-------|
| MESDC2   | 4.243  | 2.5   |
| MESP1    | 1.162  | 0     |
| MESP2    | 1.614  | 0     |
| MEST     | 5.923  | 0.69  |
| MESTP1   | 2.452  | 0.32  |
| MET      | 13.244 | 0     |
| METAP1   | 2.328  | 7.05  |
| METAP2   | 1.91   | 24.14 |
| METRNL   | 1.092  | 1.99  |
| METRNL   | 1.333  | 28.8  |
| METT10D  | 3.368  | 4.29  |
| METT11D1 | 2.845  | 12.59 |
| METT5D1  | 3.957  | 0.23  |
| METTLL1  | 2.574  | 0.38  |
| METTLL2A | 2.905  | 0.27  |
| METTLL2B | 4.364  | 0.2   |
| METTLL3  | 1.955  | 12.1  |
| METTLL4  | 3.65   | 0.9   |
| METTLL5  | 0.939  | 2.1   |
| METTLL6  | 0.994  | 1.89  |
| METTLL7A | 3.39   | 5.34  |
| METTLL7B | 1.417  | 0.35  |
| METTLL8  | 2.246  | 0.7   |
| METTLL9  | 3.138  | 17.87 |
| MFAP1    | 2.063  | 4.41  |
| MFAP2    | 1.142  | 2.08  |
| MFAP3    | 3.158  | 3.92  |
| MFAP3L   | 3.288  | 0     |
| MFAP4    | 1.813  | 0.87  |
| MFAP5    | 2.882  | 0.04  |
| MFGE8    | 1.934  | 1.64  |
| MFHAS1   | 3.754  | 9.2   |
| MFI2     | 3.222  | 1.2   |
| MFN1     | 3.519  | 9.98  |
| MFN2     | 4.539  | 12.86 |
| MFNG     | 2.034  | 19.94 |
| MFRP     | 2.519  | 0     |
| MFSD1    | 2.161  | 4.58  |
| MFSD11   | 2.526  | 4.43  |
| MFSD2    | 2.136  | 0.04  |
| MFSD3    | 1.446  | 0.48  |
| MFSD4    | 3.566  | 0.92  |
| MFSD5    | 1.76   | 11.53 |
| MFSD7    | 1.866  | 0.64  |
| MFSD8    | 1.893  | 1.67  |
| MFSD9    | 2.682  | 0.59  |
| MGA      | 12.535 | 2.06  |
| MGAM     | 12.969 | 0.87  |
| MGAT1    | 4.152  | 44.94 |
| MGAT2    | 3.012  | 11.33 |



|           |        |       |
|-----------|--------|-------|
| MGAT3     | 2.326  | 0.09  |
| MGAT4A    | 8.657  | 3.84  |
| MGAT4B    | 4.233  | 4.18  |
| MGAT4C    | 2.564  | 0     |
| MGAT5     | 6.255  | 4.63  |
| MGAT5B    | 4.555  | 1.19  |
| MGC102966 | 1.686  | 0     |
| MGC10334  | 2.193  | 3.48  |
| MGC10433  | 1.65   | 24.7  |
| MGC10646  | 2.179  | 0     |
| MGC10997  | 2.105  | 0.75  |
| MGC11102  | 2.836  | 8.52  |
| MGC11257  | 4.262  | 1.53  |
| MGC119295 | 2.442  | 0.04  |
| MGC12760  | 0.577  | 3.6   |
| MGC12965  | 2.128  | 0.32  |
| MGC12966  | 6.105  | 22.61 |
| MGC13005  | 1.652  | 0     |
| MGC13017  | 1.204  | 4.85  |
| MGC13057  | 0.692  | 0.14  |
| MGC13098  | 1.746  | 1.7   |
| MGC13114  | 1.677  | 7.73  |
| MGC13379  | 1.052  | 1.23  |
| MGC14327  | 1.557  | 9.46  |
| MGC14376  | 1.449  | 3.08  |
| MGC15523  | 5.035  | 3.88  |
| MGC157906 | 0.839  | 0     |
| MGC15885  | 2.698  | 0     |
| MGC16121  | 2.089  | 0     |
| MGC16169  | 3.31   | 0.96  |
| MGC16291  | 2.283  | 0.09  |
| MGC16385  | 2.742  | 0.94  |
| MGC16703  | 1.818  | 0     |
| MGC16824  | 3.55   | 3.37  |
| MGC17330  | 2.846  | 75.41 |
| MGC17403  | 0.657  | 1.06  |
| MGC19604  | 2.702  | 1.02  |
| MGC20983  | 2.122  | 0     |
| MGC21675  | 2.44   | 2.48  |
| MGC21874  | 7.226  | 2.49  |
| MGC22014  | 10.984 | 6.2   |
| MGC23985  | 0.506  | 0     |
| MGC24039  | 6.722  | 0.56  |
| MGC2408   | 0.986  | 0.5   |
| MGC24975  | 1.64   | 1.21  |
| MGC26356  | 2.553  | 0.04  |
| MGC26597  | 4.24   | 0.26  |
| MGC26647  | 2.036  | 0     |
| MGC26718  | 2.079  | 0.04  |
| MGC26733  | 4.844  | 0     |

|          |        |        |
|----------|--------|--------|
| MGC26963 | 2.127  | 0      |
| MGC27016 | 2.448  | 0      |
| MGC27121 | 1.644  | 0.18   |
| MGC27348 | 14.487 | 0.04   |
| MGC2752  | 3.073  | 1.23   |
| MGC29506 | 1.849  | 133.39 |
| MGC29671 | 1.893  | 1.83   |
| MGC29891 | 3.357  | 0.65   |
| MGC3032  | 5.415  | 1.13   |
| MGC3196  | 0.609  | 2.92   |
| MGC3207  | 3.389  | 5.32   |
| MGC33212 | 0.651  | 1.82   |
| MGC33407 | 1.42   | 0      |
| MGC33556 | 2.479  | 121.61 |
| MGC33657 | 2.948  | 0      |
| MGC33846 | 1.861  | 0      |
| MGC33894 | 0.915  | 1.84   |
| MGC34646 | 3.467  | 0      |
| MGC34761 | 1.97   | 0      |
| MGC34774 | 3.59   | 0.03   |
| MGC34796 | 2.055  | 0      |
| MGC34800 | 2.502  | 0      |
| MGC34821 | 1.663  | 0      |
| MGC34824 | 1.757  | 0      |
| MGC34829 | 2.949  | 0.1    |
| MGC35154 | 1.383  | 0      |
| MGC35295 | 1.536  | 0.06   |
| MGC35308 | 2.704  | 0      |
| MGC35361 | 4.434  | 0.13   |
| MGC35402 | 2.334  | 0.55   |
| MGC35440 | 2.209  | 0      |
| MGC39545 | 0.71   | 0      |
| MGC39584 | 0.586  | 0      |
| MGC39606 | 2.921  | 0      |
| MGC39715 | 2.444  | 0      |
| MGC39900 | 1.636  | 1.58   |
| MGC40405 | 5.757  | 0.97   |
| MGC40489 | 3.344  | 15.21  |
| MGC40499 | 2.94   | 1.79   |
| MGC40574 | 1.65   | 3.06   |
| MGC4093  | 0.986  | 3.51   |
| MGC4172  | 1.484  | 1.8    |
| MGC42090 | 7.952  | 0      |
| MGC42105 | 2.313  | 0      |
| MGC42157 | 1.046  | 0.76   |
| MGC42367 | 3.863  | 1.02   |
| MGC4294  | 0.968  | 0      |
| MGC44328 | 0.727  | 0      |
| MGC45134 | 1.627  | 44.82  |
| MGC45438 | 1.828  | 0      |

|          |        |        |
|----------|--------|--------|
| MGC45491 | 2.464  | 0      |
| MGC45713 | 0.959  | 0      |
| MGC45800 | 1.761  | 0      |
| MGC46336 | 1.765  | 0.17   |
| MGC46496 | 1.644  | 0      |
| MGC4655  | 2.694  | 0.29   |
| MGC4677  | 0.491  | 5.44   |
| MGC48628 | 3.927  | 0      |
| MGC50273 | 1.325  | 0      |
| MGC50559 | 2.055  | 0.14   |
| MGC50811 | 1.323  | 0.07   |
| MGC51025 | 1.616  | 0      |
| MGC5139  | 4.811  | 3.95   |
| MGC52110 | 1.662  | 6.9    |
| MGC52282 | 0.692  | 0.14   |
| MGC52498 | 1.992  | 0.35   |
| MGC57346 | 1.879  | 0.74   |
| MGC59937 | 0.74   | 0      |
| MGC61571 | 0.626  | 3.95   |
| MGC61598 | 1.77   | 0      |
| MGC7036  | 1.435  | 34.96  |
| MGC70857 | 1.932  | 0.76   |
| MGC70863 | 1.665  | 0.18   |
| MGC70870 | 2.144  | 0      |
| MGC70924 | 1.53   | 0.45   |
| MGC71993 | 0.754  | 96.44  |
| MGC72080 | 12.869 | 0.22   |
| MGC72104 | 0.873  | 8.84   |
| MGC87042 | 2.384  | 0      |
| MGC87315 | 6.66   | 0.58   |
| MGC87631 | 2.806  | 0      |
| MGC87895 | 0.838  | 224.32 |
| MGC88374 | 1.132  | 0      |
| MGC9712  | 8.99   | 0.04   |
| MGC99813 | 2.218  | 0      |
| MGEA5    | 9.236  | 71.66  |
| MGLL     | 4.884  | 0.08   |
| MGMT     | 0.864  | 22.56  |
| MGP      | 0.661  | 0.15   |
| MGRN1    | 5.017  | 25.46  |
| MGST1    | 1.507  | 0.2    |
| MGST2    | 0.801  | 9.01   |
| MGST3    | 0.663  | 0.44   |
| MIA      | 0.537  | 0.92   |
| MIA2     | 2.281  | 0      |
| MIA3     | 11.975 | 3.78   |
| MIB1     | 9.308  | 0.91   |
| MIB2     | 3.244  | 10.74  |
| MICA     | 4.103  | 0.55   |
| MICAL1   | 5.09   | 46.18  |

|           |        |        |
|-----------|--------|--------|
| MICAL2    | 3.906  | 0.12   |
| MICAL3    | 6.515  | 2.84   |
| MICALCL   | 2.362  | 0      |
| MICALL1   | 3.865  | 4.97   |
| MICALL2   | 8.01   | 0.58   |
| MICB      | 7.106  | 0.59   |
| MICC      | 13.868 | 0      |
| MICD      | 5.374  | 0      |
| MICE      | 7.449  | 0      |
| MICF      | 0.3    | 0      |
| MICG      | 0.909  | 0      |
| MID1      | 6.181  | 0      |
| MID1IP1   | 2.358  | 21.23  |
| MID2      | 2.667  | 0.26   |
| MIDN      | 3.793  | 23.71  |
| MIER1     | 4.972  | 7.72   |
| MIER2     | 2.762  | 3.94   |
| MIER3     | 5.201  | 7.71   |
| MIF       | 0.561  | 149.73 |
| MIF4GD    | 1.412  | 3.36   |
| MINA      | 2.494  | 1.08   |
| MINK1     | 5.301  | 13.46  |
| MINPP1    | 2.394  | 0.29   |
| MIOX      | 1.437  | 0.07   |
| MIP       | 2.004  | 0      |
| MIPEP     | 2.375  | 0.87   |
| MIPOL1    | 6.082  | 0      |
| MIR16     | 2.937  | 9.87   |
| MIRN100   | 0.1    | 0      |
| MIRN101-1 | 0.1    | 0      |
| MIRN101-2 | 0.1    | 0      |
| MIRN103-1 | 0.1    | 0      |
| MIRN103-2 | 0.1    | 0      |
| MIRN105-1 | 0.1    | 0      |
| MIRN105-2 | 0.1    | 0      |
| MIRN106A  | 0.1    | 0      |
| MIRN106B  | 0.1    | 0      |
| MIRN107   | 0.1    | 0      |
| MIRN10A   | 0.1    | 0      |
| MIRN10B   | 0.1    | 0      |
| MIRN1-1   | 0.1    | 0      |
| MIRN1-2   | 0.1    | 0      |
| MIRN122A  | 0.1    | 0      |
| MIRN124A1 | 0.1    | 0      |
| MIRN124A2 | 0.1    | 0      |
| MIRN124A3 | 0.1    | 0      |
| MIRN125A  | 0.1    | 0      |
| MIRN125B1 | 0.1    | 0      |
| MIRN125B2 | 0.1    | 0      |
| MIRN126   | 0.1    | 0      |

|           |     |   |
|-----------|-----|---|
| MIRN127   | 0.1 | 0 |
| MIRN128A  | 0.1 | 0 |
| MIRN128B  | 0.1 | 0 |
| MIRN129-1 | 0.1 | 0 |
| MIRN129-2 | 0.1 | 0 |
| MIRN130A  | 0.1 | 0 |
| MIRN130B  | 0.1 | 0 |
| MIRN132   | 0.1 | 0 |
| MIRN133A1 | 0.1 | 0 |
| MIRN133A2 | 0.1 | 0 |
| MIRN133B  | 0.1 | 0 |
| MIRN134   | 0.1 | 0 |
| MIRN135A1 | 0.1 | 0 |
| MIRN135A2 | 0.1 | 0 |
| MIRN135B  | 0.1 | 0 |
| MIRN136   | 0.1 | 0 |
| MIRN137   | 0.1 | 0 |
| MIRN138-1 | 0.1 | 0 |
| MIRN138-2 | 0.1 | 0 |
| MIRN139   | 0.1 | 0 |
| MIRN140   | 0.1 | 0 |
| MIRN141   | 0.1 | 0 |
| MIRN142   | 0.1 | 0 |
| MIRN143   | 0.1 | 0 |
| MIRN144   | 0.1 | 0 |
| MIRN145   | 0.1 | 0 |
| MIRN146A  | 0.1 | 0 |
| MIRN146B  | 0.1 | 0 |
| MIRN147   | 0.1 | 0 |
| MIRN148A  | 0.1 | 0 |
| MIRN148B  | 0.1 | 0 |
| MIRN149   | 0.1 | 0 |
| MIRN150   | 0.1 | 0 |
| MIRN151   | 0.1 | 0 |
| MIRN153-1 | 0.1 | 0 |
| MIRN153-2 | 0.1 | 0 |
| MIRN154   | 0.1 | 0 |
| MIRN155   | 0.1 | 0 |
| MIRN15A   | 0.1 | 0 |
| MIRN15B   | 0.1 | 0 |
| MIRN16-1  | 0.1 | 0 |
| MIRN16-2  | 0.1 | 0 |
| MIRN17    | 0.1 | 0 |
| MIRN181A1 | 0.1 | 0 |
| MIRN181A2 | 0.1 | 0 |
| MIRN181B1 | 0.1 | 0 |
| MIRN181B2 | 0.1 | 0 |
| MIRN181C  | 0.1 | 0 |
| MIRN181D  | 0.1 | 0 |
| MIRN182   | 0.1 | 0 |

|           |     |   |
|-----------|-----|---|
| MIRN183   | 0.1 | 0 |
| MIRN184   | 0.1 | 0 |
| MIRN185   | 0.1 | 0 |
| MIRN186   | 0.1 | 0 |
| MIRN187   | 0.1 | 0 |
| MIRN188   | 0.1 | 0 |
| MIRN18A   | 0.1 | 0 |
| MIRN18B   | 0.1 | 0 |
| MIRN190   | 0.1 | 0 |
| MIRN191   | 0.1 | 0 |
| MIRN192   | 0.1 | 0 |
| MIRN193A  | 0.1 | 0 |
| MIRN193B  | 0.1 | 0 |
| MIRN194-1 | 0.1 | 0 |
| MIRN194-2 | 0.1 | 0 |
| MIRN195   | 0.1 | 0 |
| MIRN196A1 | 0.1 | 0 |
| MIRN196A2 | 0.1 | 0 |
| MIRN196B  | 0.1 | 0 |
| MIRN197   | 0.1 | 0 |
| MIRN198   | 0.1 | 0 |
| MIRN199A1 | 0.1 | 0 |
| MIRN199A2 | 0.1 | 0 |
| MIRN199B  | 0.1 | 0 |
| MIRN19A   | 0.1 | 0 |
| MIRN19B1  | 0.1 | 0 |
| MIRN19B2  | 0.1 | 0 |
| MIRN200A  | 0.1 | 0 |
| MIRN200B  | 0.1 | 0 |
| MIRN200C  | 0.1 | 0 |
| MIRN202   | 0.1 | 0 |
| MIRN203   | 0.1 | 0 |
| MIRN204   | 0.1 | 0 |
| MIRN205   | 0.1 | 0 |
| MIRN206   | 0.1 | 0 |
| MIRN208   | 0.1 | 0 |
| MIRN20A   | 0.1 | 0 |
| MIRN20B   | 0.1 | 0 |
| MIRN21    | 0.1 | 0 |
| MIRN210   | 0.1 | 0 |
| MIRN211   | 0.1 | 0 |
| MIRN212   | 0.1 | 0 |
| MIRN214   | 0.1 | 0 |
| MIRN215   | 0.1 | 0 |
| MIRN216   | 0.1 | 0 |
| MIRN217   | 0.1 | 0 |
| MIRN218-1 | 0.1 | 0 |
| MIRN218-2 | 0.1 | 0 |
| MIRN219-1 | 0.1 | 0 |
| MIRN219-2 | 0.1 | 0 |

|           |     |   |
|-----------|-----|---|
| MIRN22    | 0.1 | 0 |
| MIRN220   | 0.1 | 0 |
| MIRN221   | 0.1 | 0 |
| MIRN222   | 0.1 | 0 |
| MIRN223   | 0.1 | 0 |
| MIRN224   | 0.1 | 0 |
| MIRN23A   | 0.1 | 0 |
| MIRN23B   | 0.1 | 0 |
| MIRN24-1  | 0.1 | 0 |
| MIRN24-2  | 0.1 | 0 |
| MIRN25    | 0.1 | 0 |
| MIRN26A1  | 0.1 | 0 |
| MIRN26A2  | 0.1 | 0 |
| MIRN26B   | 0.1 | 0 |
| MIRN27A   | 0.1 | 0 |
| MIRN27B   | 0.1 | 0 |
| MIRN28    | 0.1 | 0 |
| MIRN299   | 0.1 | 0 |
| MIRN29A   | 0.1 | 0 |
| MIRN29B1  | 0.1 | 0 |
| MIRN29B2  | 0.1 | 0 |
| MIRN29C   | 0.1 | 0 |
| MIRN301   | 0.1 | 0 |
| MIRN302A  | 0.1 | 0 |
| MIRN302B  | 0.1 | 0 |
| MIRN302C  | 0.1 | 0 |
| MIRN302D  | 0.1 | 0 |
| MIRN30A   | 0.1 | 0 |
| MIRN30B   | 0.1 | 0 |
| MIRN30C1  | 0.1 | 0 |
| MIRN30C2  | 0.1 | 0 |
| MIRN30D   | 0.1 | 0 |
| MIRN30E   | 0.1 | 0 |
| MIRN31    | 0.1 | 0 |
| MIRN32    | 0.1 | 0 |
| MIRN320   | 0.1 | 0 |
| MIRN323   | 0.1 | 0 |
| MIRN324   | 0.1 | 0 |
| MIRN325   | 0.1 | 0 |
| MIRN326   | 0.1 | 0 |
| MIRN329-1 | 0.1 | 0 |
| MIRN329-2 | 0.1 | 0 |
| MIRN33    | 0.1 | 0 |
| MIRN330   | 0.1 | 0 |
| MIRN331   | 0.1 | 0 |
| MIRN335   | 0.1 | 0 |
| MIRN337   | 0.1 | 0 |
| MIRN338   | 0.1 | 0 |
| MIRN339   | 0.1 | 0 |
| MIRN33B   | 0.1 | 0 |

|           |     |   |
|-----------|-----|---|
| MIRN340   | 0.1 | 0 |
| MIRN342   | 0.1 | 0 |
| MIRN345   | 0.1 | 0 |
| MIRN346   | 0.1 | 0 |
| MIRN34A   | 0.1 | 0 |
| MIRN34B   | 0.1 | 0 |
| MIRN34C   | 0.1 | 0 |
| MIRN361   | 0.1 | 0 |
| MIRN362   | 0.1 | 0 |
| MIRN363   | 0.1 | 0 |
| MIRN367   | 0.1 | 0 |
| MIRN368   | 0.1 | 0 |
| MIRN369   | 0.1 | 0 |
| MIRN370   | 0.1 | 0 |
| MIRN371   | 0.1 | 0 |
| MIRN372   | 0.1 | 0 |
| MIRN373   | 0.1 | 0 |
| MIRN374   | 0.1 | 0 |
| MIRN375   | 0.1 | 0 |
| MIRN376A1 | 0.1 | 0 |
| MIRN376A2 | 0.1 | 0 |
| MIRN376B  | 0.1 | 0 |
| MIRN377   | 0.1 | 0 |
| MIRN378   | 0.1 | 0 |
| MIRN379   | 0.1 | 0 |
| MIRN380   | 0.1 | 0 |
| MIRN381   | 0.1 | 0 |
| MIRN382   | 0.1 | 0 |
| MIRN383   | 0.1 | 0 |
| MIRN384   | 0.1 | 0 |
| MIRN409   | 0.1 | 0 |
| MIRN410   | 0.1 | 0 |
| MIRN411   | 0.1 | 0 |
| MIRN412   | 0.1 | 0 |
| MIRN421   | 0.1 | 0 |
| MIRN422A  | 0.1 | 0 |
| MIRN423   | 0.1 | 0 |
| MIRN424   | 0.1 | 0 |
| MIRN425   | 0.1 | 0 |
| MIRN429   | 0.1 | 0 |
| MIRN431   | 0.1 | 0 |
| MIRN432   | 0.1 | 0 |
| MIRN433   | 0.1 | 0 |
| MIRN448   | 0.1 | 0 |
| MIRN449   | 0.1 | 0 |
| MIRN449B  | 0.1 | 0 |
| MIRN450-1 | 0.1 | 0 |
| MIRN450-2 | 0.1 | 0 |
| MIRN451   | 0.1 | 0 |
| MIRN452   | 0.1 | 0 |



|           |     |   |
|-----------|-----|---|
| MIRN453   | 0.1 | 0 |
| MIRN455   | 0.1 | 0 |
| MIRN483   | 0.1 | 0 |
| MIRN484   | 0.1 | 0 |
| MIRN485   | 0.1 | 0 |
| MIRN486   | 0.1 | 0 |
| MIRN487A  | 0.1 | 0 |
| MIRN487B  | 0.1 | 0 |
| MIRN488   | 0.1 | 0 |
| MIRN489   | 0.1 | 0 |
| MIRN490   | 0.1 | 0 |
| MIRN491   | 0.1 | 0 |
| MIRN492   | 0.1 | 0 |
| MIRN493   | 0.1 | 0 |
| MIRN494   | 0.1 | 0 |
| MIRN495   | 0.1 | 0 |
| MIRN496   | 0.1 | 0 |
| MIRN497   | 0.1 | 0 |
| MIRN498   | 0.1 | 0 |
| MIRN499   | 0.1 | 0 |
| MIRN500   | 0.1 | 0 |
| MIRN501   | 0.1 | 0 |
| MIRN502   | 0.1 | 0 |
| MIRN503   | 0.1 | 0 |
| MIRN504   | 0.1 | 0 |
| MIRN505   | 0.1 | 0 |
| MIRN506   | 0.1 | 0 |
| MIRN507   | 0.1 | 0 |
| MIRN508   | 0.1 | 0 |
| MIRN509   | 0.1 | 0 |
| MIRN510   | 0.1 | 0 |
| MIRN512-1 | 0.1 | 0 |
| MIRN512-2 | 0.1 | 0 |
| MIRN513-1 | 0.1 | 0 |
| MIRN513-2 | 0.1 | 0 |
| MIRN514-1 | 0.1 | 0 |
| MIRN514-2 | 0.1 | 0 |
| MIRN514-3 | 0.1 | 0 |
| MIRN515-1 | 0.1 | 0 |
| MIRN515-2 | 0.1 | 0 |
| MIRN516-1 | 0.1 | 0 |
| MIRN516-2 | 0.1 | 0 |
| MIRN516-3 | 0.1 | 0 |
| MIRN516-4 | 0.1 | 0 |
| MIRN517A  | 0.1 | 0 |
| MIRN517B  | 0.1 | 0 |
| MIRN517C  | 0.1 | 0 |
| MIRN518A1 | 0.1 | 0 |
| MIRN518A2 | 0.1 | 0 |
| MIRN518B  | 0.1 | 0 |

|           |     |   |
|-----------|-----|---|
| MIRN518C  | 0.1 | 0 |
| MIRN518D  | 0.1 | 0 |
| MIRN518E  | 0.1 | 0 |
| MIRN518F  | 0.1 | 0 |
| MIRN519A1 | 0.1 | 0 |
| MIRN519A2 | 0.1 | 0 |
| MIRN519B  | 0.1 | 0 |
| MIRN519C  | 0.1 | 0 |
| MIRN519D  | 0.1 | 0 |
| MIRN519E  | 0.1 | 0 |
| MIRN520A  | 0.1 | 0 |
| MIRN520B  | 0.1 | 0 |
| MIRN520C  | 0.1 | 0 |
| MIRN520D  | 0.1 | 0 |
| MIRN520E  | 0.1 | 0 |
| MIRN520F  | 0.1 | 0 |
| MIRN520G  | 0.1 | 0 |
| MIRN520H  | 0.1 | 0 |
| MIRN521-1 | 0.1 | 0 |
| MIRN521-2 | 0.1 | 0 |
| MIRN522   | 0.1 | 0 |
| MIRN523   | 0.1 | 0 |
| MIRN524   | 0.1 | 0 |
| MIRN526A1 | 0.1 | 0 |
| MIRN526A2 | 0.1 | 0 |
| MIRN526B  | 0.1 | 0 |
| MIRN527   | 0.1 | 0 |
| MIRN532   | 0.1 | 0 |
| MIRN539   | 0.1 | 0 |
| MIRN542   | 0.1 | 0 |
| MIRN544   | 0.1 | 0 |
| MIRN545   | 0.1 | 0 |
| MIRN548A1 | 0.1 | 0 |
| MIRN548A2 | 0.1 | 0 |
| MIRN548A3 | 0.1 | 0 |
| MIRN548B  | 0.1 | 0 |
| MIRN548C  | 0.1 | 0 |
| MIRN548D1 | 0.1 | 0 |
| MIRN548D2 | 0.1 | 0 |
| MIRN549   | 0.1 | 0 |
| MIRN550-1 | 0.1 | 0 |
| MIRN550-2 | 0.1 | 0 |
| MIRN551A  | 0.1 | 0 |
| MIRN551B  | 0.1 | 0 |
| MIRN552   | 0.1 | 0 |
| MIRN553   | 0.1 | 0 |
| MIRN554   | 0.1 | 0 |
| MIRN555   | 0.1 | 0 |
| MIRN556   | 0.1 | 0 |
| MIRN557   | 0.1 | 0 |

|         |     |   |
|---------|-----|---|
| MIRN559 | 0.1 | 0 |
| MIRN560 | 0.1 | 0 |
| MIRN561 | 0.1 | 0 |
| MIRN562 | 0.1 | 0 |
| MIRN563 | 0.1 | 0 |
| MIRN564 | 0.1 | 0 |
| MIRN565 | 0.1 | 0 |
| MIRN566 | 0.1 | 0 |
| MIRN569 | 0.1 | 0 |
| MIRN570 | 0.1 | 0 |
| MIRN571 | 0.1 | 0 |
| MIRN572 | 0.1 | 0 |
| MIRN573 | 0.1 | 0 |
| MIRN575 | 0.1 | 0 |
| MIRN576 | 0.1 | 0 |
| MIRN577 | 0.1 | 0 |
| MIRN578 | 0.1 | 0 |
| MIRN579 | 0.1 | 0 |
| MIRN580 | 0.1 | 0 |
| MIRN581 | 0.1 | 0 |
| MIRN582 | 0.1 | 0 |
| MIRN583 | 0.1 | 0 |
| MIRN584 | 0.1 | 0 |
| MIRN585 | 0.1 | 0 |
| MIRN586 | 0.1 | 0 |
| MIRN587 | 0.1 | 0 |
| MIRN588 | 0.1 | 0 |
| MIRN589 | 0.1 | 0 |
| MIRN590 | 0.1 | 0 |
| MIRN591 | 0.1 | 0 |
| MIRN592 | 0.1 | 0 |
| MIRN593 | 0.1 | 0 |
| MIRN594 | 0.1 | 0 |
| MIRN595 | 0.1 | 0 |
| MIRN596 | 0.1 | 0 |
| MIRN597 | 0.1 | 0 |
| MIRN598 | 0.1 | 0 |
| MIRN599 | 0.1 | 0 |
| MIRN600 | 0.1 | 0 |
| MIRN601 | 0.1 | 0 |
| MIRN602 | 0.1 | 0 |
| MIRN603 | 0.1 | 0 |
| MIRN604 | 0.1 | 0 |
| MIRN605 | 0.1 | 0 |
| MIRN606 | 0.1 | 0 |
| MIRN607 | 0.1 | 0 |
| MIRN608 | 0.1 | 0 |
| MIRN609 | 0.1 | 0 |
| MIRN610 | 0.1 | 0 |
| MIRN611 | 0.1 | 0 |

|         |     |   |
|---------|-----|---|
| MIRN612 | 0.1 | 0 |
| MIRN613 | 0.1 | 0 |
| MIRN614 | 0.1 | 0 |
| MIRN616 | 0.1 | 0 |
| MIRN617 | 0.1 | 0 |
| MIRN618 | 0.1 | 0 |
| MIRN619 | 0.1 | 0 |
| MIRN621 | 0.1 | 0 |
| MIRN622 | 0.1 | 0 |
| MIRN623 | 0.1 | 0 |
| MIRN624 | 0.1 | 0 |
| MIRN625 | 0.1 | 0 |
| MIRN626 | 0.1 | 0 |
| MIRN627 | 0.1 | 0 |
| MIRN628 | 0.1 | 0 |
| MIRN629 | 0.1 | 0 |
| MIRN630 | 0.1 | 0 |
| MIRN631 | 0.1 | 0 |
| MIRN632 | 0.1 | 0 |
| MIRN633 | 0.1 | 0 |
| MIRN634 | 0.1 | 0 |
| MIRN635 | 0.1 | 0 |
| MIRN636 | 0.1 | 0 |
| MIRN637 | 0.1 | 0 |
| MIRN639 | 0.1 | 0 |
| MIRN640 | 0.1 | 0 |
| MIRN641 | 0.1 | 0 |
| MIRN642 | 0.1 | 0 |
| MIRN643 | 0.1 | 0 |
| MIRN645 | 0.1 | 0 |
| MIRN646 | 0.1 | 0 |
| MIRN647 | 0.1 | 0 |
| MIRN648 | 0.1 | 0 |
| MIRN649 | 0.1 | 0 |
| MIRN650 | 0.1 | 0 |
| MIRN651 | 0.1 | 0 |
| MIRN652 | 0.1 | 0 |
| MIRN653 | 0.1 | 0 |
| MIRN654 | 0.1 | 0 |
| MIRN655 | 0.1 | 0 |
| MIRN656 | 0.1 | 0 |
| MIRN657 | 0.1 | 0 |
| MIRN658 | 0.1 | 0 |
| MIRN659 | 0.1 | 0 |
| MIRN660 | 0.1 | 0 |
| MIRN661 | 0.1 | 0 |
| MIRN662 | 0.1 | 0 |
| MIRN663 | 0.1 | 0 |
| MIRN7-1 | 0.1 | 0 |
| MIRN7-2 | 0.1 | 0 |

|            |        |        |
|------------|--------|--------|
| MIRN7-3    | 0.1    | 0      |
| MIRN9-1    | 0.1    | 0      |
| MIRN9-2    | 0.1    | 0      |
| MIRN92-1   | 0.1    | 0      |
| MIRN92-2   | 0.1    | 0      |
| MIRN93     | 0.1    | 0      |
| MIRN9-3    | 0.1    | 0      |
| MIRN95     | 0.1    | 0      |
| MIRN96     | 0.1    | 0      |
| MIRN98     | 0.1    | 0      |
| MIRN99A    | 0.1    | 0      |
| MIRN99B    | 0.1    | 0      |
| MIRNLET7A1 | 0.1    | 0      |
| MIRNLET7A2 | 0.1    | 0      |
| MIRNLET7A3 | 0.1    | 0      |
| MIRNLET7B  | 0.1    | 0      |
| MIRNLET7C  | 0.1    | 0      |
| MIRNLET7D  | 0.545  | 9.8    |
| MIRNLET7E  | 0.1    | 0      |
| MIRNLET7F1 | 0.1    | 0      |
| MIRNLET7F2 | 0.1    | 0      |
| MIRNLET7G  | 0.1    | 0      |
| MIRNLET7I  | 0.1    | 0      |
| MIS12      | 2.502  | 9.37   |
| MIST       | 1.782  | 0      |
| MITD1      | 0.91   | 3.26   |
| MITF       | 5.463  | 0      |
| MIXL1      | 0.699  | 0      |
| MIZF       | 2.3    | 3.09   |
| MKI67      | 12.497 | 2.58   |
| MKI67IP    | 1.67   | 4.32   |
| MKKS       | 2.774  | 0.82   |
| MKL1       | 4.49   | 9.23   |
| MKL2       | 8.634  | 0.63   |
| MKLN1      | 22.736 | 3      |
| MKNK1      | 3.18   | 7.56   |
| MKNK2      | 4.546  | 115.48 |
| MKRN1      | 6.146  | 15.3   |
| MKRN2      | 2.767  | 6.26   |
| MKRN3      | 3.107  | 0      |
| MKRN4      | 3.669  | 0.4    |
| MKRNP1     | 3.747  | 0.53   |
| MKRNP2     | 3.656  | 0      |
| MKRNP3     | 1.262  | 0      |
| MKS1       | 2.397  | 1.08   |
| MKX        | 3.605  | 0      |
| MLANA      | 1.524  | 0      |
| MLC1       | 4.174  | 1.73   |
| MLCK       | 2.74   | 0.29   |
| MLF1       | 1.105  | 0.53   |

|        |        |       |
|--------|--------|-------|
| MLF1IP | 2.533  | 2.89  |
| MLF2   | 1.517  | 47.61 |
| MLH1   | 2.524  | 4     |
| MLH3   | 7.896  | 0.73  |
| MLKL   | 2.498  | 2.93  |
| MLL    | 14.982 | 9.9   |
| MLL2   | 16.828 | 9.91  |
| MLL3   | 36.091 | 5.34  |
| MLL4   | 8.468  | 6.68  |
| MLL5   | 15.171 | 39.27 |
| MLLT1  | 4.505  | 3.12  |
| MLLT10 | 5.214  | 12.22 |
| MLLT11 | 2.158  | 2.52  |
| MLLT3  | 3.375  | 0.29  |
| MLLT4  | 11.573 | 5.97  |
| MLLT6  | 6.847  | 27.66 |
| MLLT7  | 3.137  | 6.59  |
| MLN    | 0.58   | 0     |
| MLNR   | 1.239  | 0.24  |
| MLPH   | 2.38   | 0     |
| MLSTD1 | 2.095  | 1     |
| MLSTD2 | 5.602  | 8.1   |
| MLX    | 2.604  | 9.69  |
| MLXIP  | 9.557  | 75.88 |
| MLXIPL | 6.926  | 0.29  |
| MLYCD  | 2.142  | 0.84  |
| MLZE   | 2.714  | 0     |
| MMAA   | 1.473  | 1.14  |
| MMAB   | 2.348  | 1.22  |
| MMACHC | 2.227  | 0.13  |
| MMD    | 2.723  | 2.54  |
| MMD2   | 4.67   | 0.04  |
| MME    | 7.72   | 62.9  |
| MMEL1  | 2.85   | 0.07  |
| MMP1   | 1.973  | 0     |
| MMP10  | 1.743  | 0     |
| MMP11  | 2.261  | 0.27  |
| MMP12  | 1.824  | 0     |
| MMP13  | 2.715  | 0     |
| MMP14  | 3.538  | 10.29 |
| MMP15  | 4.438  | 0.2   |
| MMP16  | 6.623  | 0     |
| MMP17  | 2.411  | 8.91  |
| MMP19  | 5.445  | 0.45  |
| MMP2   | 3.536  | 0.05  |
| MMP20  | 1.956  | 0     |
| MMP21  | 1.919  | 0.05  |
| MMP23A | 5.465  | 2.64  |
| MMP23B | 1.565  | 2.53  |
| MMP24  | 4.182  | 3.24  |

|          |        |       |
|----------|--------|-------|
| MMP25    | 4.722  | 2.5   |
| MMP26    | 0.991  | 0     |
| MMP27    | 1.647  | 0     |
| MMP28    | 3.035  | 8.67  |
| MMP3     | 1.828  | 0     |
| MMP7     | 1.119  | 0.09  |
| MMP8     | 2.225  | 3.33  |
| MMP9     | 2.536  | 13.07 |
| MMRN1    | 4.969  | 4.06  |
| MMRN2    | 3.828  | 0     |
| MMS19L   | 3.485  | 12.52 |
| MN1      | 7.556  | 0.22  |
| MNAT1    | 1.372  | 2.09  |
| MND1     | 0.941  | 0.52  |
| MNDA     | 1.667  | 1.78  |
| MNS1     | 1.945  | 0.2   |
| MNT      | 5.142  | 10.95 |
| MOAP1    | 2.417  | 13.59 |
| MOBK1B   | 4.292  | 28.61 |
| MOBK1A   | 6.958  | 2.58  |
| MOBK2A   | 3.531  | 27.52 |
| MOBK2B   | 6.525  | 1.47  |
| MOBK2C   | 3.392  | 1.64  |
| MOBP     | 2.588  | 0     |
| MOCOS    | 2.724  | 0     |
| MOCS1    | 4.541  | 0     |
| MOCS2    | 2.329  | 1.79  |
| MOCS3    | 2.458  | 2.18  |
| MOCS3P   | 1.638  | 0     |
| MOG      | 16.242 | 0     |
| MOGAT1   | 1.093  | 0     |
| MOGAT2   | 1.005  | 0     |
| MOGAT3   | 2.82   | 0     |
| MON1A    | 2.038  | 0.49  |
| MON1B    | 3.734  | 10.51 |
| MON2     | 6.071  | 3.87  |
| MORC1    | 3.743  | 0     |
| MORC2    | 4.467  | 7.26  |
| MORC3    | 4.227  | 9.39  |
| MORC4    | 3.041  | 1.79  |
| MORF4    | 0.708  | 0.28  |
| MORF4L1  | 2.155  | 30.21 |
| MORF4L2  | 2.07   | 41.05 |
| MORF4LP1 | 1.795  | 28.61 |
| MORF4LP3 | 2.435  | 0.28  |
| MORF4LP4 | 2.009  | 0.15  |
| MORG1    | 1.129  | 8.59  |
| MORN1    | 1.641  | 1.21  |
| MORN2    | 0.681  | 0.73  |
| MORN3    | 1.158  | 1.2   |

|           |       |       |
|-----------|-------|-------|
| MOS       | 1.041 | 0     |
| MOSC1     | 2     | 0.05  |
| MOSC2     | 1.576 | 0     |
| MOSPD1    | 2.358 | 0.34  |
| MOSPD2    | 3.171 | 0.41  |
| MOSPD3    | 3.322 | 0.95  |
| MOV10     | 3.809 | 25.61 |
| MOV10L1   | 3.898 | 0     |
| MOXD1     | 2.166 | 0     |
| MPDU1     | 1.4   | 8.98  |
| MPDZ      | 6.564 | 0     |
| MPEG1     | 8.313 | 0.67  |
| MPFL      | 3.162 | 0.04  |
| MPG       | 1.831 | 13.13 |
| MPHOSPH1  | 6.31  | 0.76  |
| MPHOSPH10 | 2.483 | 2.55  |
| MPHOSPH6  | 1.08  | 1.38  |
| MPHOSPH9  | 4.066 | 5.08  |
| MPI       | 1.771 | 3.57  |
| MPL       | 3.645 | 0.21  |
| MPN2      | 1.243 | 0     |
| MPND      | 1.513 | 5.43  |
| MPO       | 3.215 | 30.44 |
| MPP1      | 3.465 | 30.15 |
| MPP2      | 4.412 | 0.07  |
| MPP3      | 2.996 | 0     |
| MPP4      | 2.435 | 0     |
| MPP5      | 5.357 | 0.94  |
| MPP6      | 4.374 | 0.79  |
| MPP7      | 2.092 | 0.14  |
| MPPE1     | 2.806 | 3.57  |
| MPPED1    | 1.537 | 0     |
| MPPED2    | 2.249 | 0     |
| MPST      | 1.728 | 17.12 |
| MPV17     | 0.998 | 10.71 |
| MPV17L    | 2.213 | 0.31  |
| MPZ       | 1.944 | 1.17  |
| MPZL1     | 6.897 | 2.29  |
| MR1       | 1.263 | 2.42  |
| MRAP      | 1.234 | 0.72  |
| MRAS      | 3.91  | 0     |
| MRC1      | 5.171 | 4.04  |
| MRC1L1    | 5.171 | 7.02  |
| MRC2      | 4.693 | 0.11  |
| MRCL3     | 1.229 | 48.38 |
| MRE11A    | 5.332 | 2.93  |
| MRE11B    | 1.65  | 0.06  |
| MREG      | 1.533 | 0.06  |
| MRFAP1    | 1.534 | 92.17 |
| MRFAP1L1  | 3.333 | 6.06  |



|          |        |       |
|----------|--------|-------|
| MRGPRD   | 0.966  | 0     |
| MRGPRE   | 1.02   | 0     |
| MRGPRF   | 2.152  | 0     |
| MRGPRG   | 0.87   | 0     |
| MRGPRX1  | 1.207  | 0     |
| MRGPRX2  | 2.036  | 0     |
| MRGPRX3  | 1.639  | 0     |
| MRGPRX4  | 1.442  | 0     |
| M-RIP    | 10.926 | 20.99 |
| MRLC2    | 0.879  | 44.23 |
| MRM1     | 1.833  | 0.54  |
| MRO      | 2.108  | 0     |
| MRP63    | 2.658  | 4.13  |
| MRP63P1  | 0.285  | 0     |
| MRP63P10 | 0.262  | 0     |
| MRP63P2  | 0.208  | 0     |
| MRP63P3  | 0.196  | 1.01  |
| MRP63P6  | 0.326  | 0     |
| MRP63P7  | 0.273  | 0     |
| MRP63P8  | 0.275  | 0     |
| MRP63P9  | 0.195  | 0     |
| MRPL1    | 1.258  | 8.03  |
| MRPL10   | 1.921  | 18.9  |
| MRPL11   | 1.249  | 12.68 |
| MRPL11P2 | 0.419  | 0.71  |
| MRPL11P3 | 0.11   | 0     |
| MRPL12   | 1      | 6.63  |
| MRPL13   | 1.11   | 5     |
| MRPL14   | 0.775  | 25.28 |
| MRPL14P1 | 0.197  | 0     |
| MRPL15   | 1.136  | 14.37 |
| MRPL15P1 | 1.163  | 0     |
| MRPL16   | 1.463  | 29.89 |
| MRPL17   | 1.044  | 2.56  |
| MRPL18   | 0.971  | 16.1  |
| MRPL19   | 7.827  | 0.91  |
| MRPL2    | 1.286  | 11    |
| MRPL20   | 0.681  | 18.74 |
| MRPL20P1 | 0.47   | 0.84  |
| MRPL21   | 1.044  | 16.3  |
| MRPL22   | 0.839  | 18.75 |
| MRPL22P1 | 0.688  | 0.44  |
| MRPL23   | 0.699  | 37.36 |
| MRPL24   | 1.006  | 4.33  |
| MRPL27   | 3.158  | 1.56  |
| MRPL28   | 1.099  | 14.22 |
| MRPL2P1  | 0.92   | 0.53  |
| MRPL3    | 1.733  | 7.25  |
| MRPL30   | 3.093  | 3.23  |
| MRPL30P1 | 0.371  | 0.8   |

|          |       |       |
|----------|-------|-------|
| MRPL30P2 | 0.382 | 0.77  |
| MRPL32   | 2.166 | 8.41  |
| MRPL32P1 | 0.264 | 0     |
| MRPL33   | 0.827 | 10.29 |
| MRPL34   | 0.968 | 9.5   |
| MRPL35   | 3.336 | 1.78  |
| MRPL35P1 | 0.372 | 0     |
| MRPL35P2 | 0.371 | 0     |
| MRPL35P3 | 0.37  | 0     |
| MRPL35P4 | 0.369 | 0     |
| MRPL36   | 0.604 | 9.18  |
| MRPL36P1 | 0.312 | 0.63  |
| MRPL37   | 1.478 | 23.56 |
| MRPL38   | 1.868 | 12.76 |
| MRPL39   | 1.27  | 8.42  |
| MRPL3P1  | 1.038 | 3.91  |
| MRPL4    | 3.064 | 7.65  |
| MRPL40   | 0.776 | 15.3  |
| MRPL41   | 0.568 | 63.23 |
| MRPL42   | 2.303 | 2.2   |
| MRPL42P1 | 0.426 | 0     |
| MRPL42P2 | 0.429 | 0     |
| MRPL42P3 | 0.339 | 1.46  |
| MRPL42P4 | 0.702 | 0     |
| MRPL42P5 | 0.667 | 0.44  |
| MRPL43   | 3.318 | 5.52  |
| MRPL44   | 1.728 | 7.85  |
| MRPL45   | 1.696 | 28.24 |
| MRPL45P1 | 0.749 | 0.27  |
| MRPL46   | 0.985 | 4.82  |
| MRPL47   | 1.399 | 6.79  |
| MRPL48   | 1.977 | 4.1   |
| MRPL48P1 | 0.636 | 0.63  |
| MRPL49   | 2.089 | 12.74 |
| MRPL49P1 | 0.537 | 0.36  |
| MRPL49P2 | 0.468 | 0     |
| MRPL50   | 0.998 | 1.99  |
| MRPL50P1 | 0.398 | 0     |
| MRPL50P2 | 0.482 | 0.21  |
| MRPL50P3 | 0.477 | 0     |
| MRPL50P4 | 0.48  | 0     |
| MRPL51   | 0.663 | 19.85 |
| MRPL51P1 | 0.263 | 0     |
| MRPL51P2 | 0.376 | 1.05  |
| MRPL52   | 2.463 | 2.04  |
| MRPL53   | 0.616 | 34.53 |
| MRPL53P1 | 0.354 | 1.68  |
| MRPL54   | 0.609 | 16.09 |
| MRPL55   | 1.284 | 13.17 |
| MRPL9    | 1.292 | 43.04 |

|           |       |       |
|-----------|-------|-------|
| MRPL9P1   | 1.026 | 1.83  |
| MRPS10    | 2.11  | 6.19  |
| MRPS10P1  | 0.131 | 0     |
| MRPS10P2  | 0.404 | 0     |
| MRPS10P5  | 0.579 | 4.27  |
| MRPS11    | 1.415 | 5.39  |
| MRPS11P1  | 0.619 | 0.32  |
| MRPS12    | 1.606 | 4.19  |
| MRPS14    | 1.081 | 4.94  |
| MRPS15    | 0.883 | 25.66 |
| MRPS15P1  | 0.756 | 0.39  |
| MRPS15P2  | 0.978 | 0.2   |
| MRPS16    | 2.634 | 10.7  |
| MRPS16P   | 0.411 | 0     |
| MRPS16P1  | 0.416 | 0.71  |
| MRPS16P3  | 0.41  | 0     |
| MRPS17    | 1.172 | 3.21  |
| MRPS17P1  | 0.393 | 1     |
| MRPS17P3  | 0.389 | 0     |
| MRPS17P5  | 0.186 | 0     |
| MRPS17P6  | 0.211 | 0     |
| MRPS17P7  | 0.393 | 0     |
| MRPS17P9  | 0.393 | 0     |
| MRPS18A   | 1.06  | 10.55 |
| MRPS18AP1 | 0.592 | 0.34  |
| MRPS18B   | 4.227 | 0     |
| MRPS18BP1 | 0.192 | 0     |
| MRPS18BP2 | 0.776 | 0.76  |
| MRPS18C   | 1.014 | 5.17  |
| MRPS18CP2 | 0.293 | 3.38  |
| MRPS18CP3 | 0.229 | 0     |
| MRPS18CP5 | 0.431 | 0.68  |
| MRPS18CP6 | 0.243 | 0.41  |
| MRPS2     | 1.434 | 11.46 |
| MRPS21    | 1.142 | 30.67 |
| MRPS21P1  | 0.262 | 0     |
| MRPS21P2  | 0.264 | 0.75  |
| MRPS21P3  | 0.264 | 0     |
| MRPS21P4  | 0.145 | 0     |
| MRPS21P5  | 0.27  | 0     |
| MRPS21P6  | 0.264 | 9.37  |
| MRPS21P7  | 0.26  | 0     |
| MRPS21P8  | 0.26  | 0     |
| MRPS21P9  | 0.267 | 0     |
| MRPS22    | 1.123 | 12.07 |
| MRPS22P1  | 0.457 | 0     |
| MRPS23    | 0.903 | 8.43  |
| MRPS23P1  | 1.808 | 0     |
| MRPS24    | 1.296 | 25.19 |
| MRPS24P1  | 0.492 | 3.02  |

|          |        |       |
|----------|--------|-------|
| MRPS25   | 4.566  | 7.2   |
| MRPS25P1 | 0.52   | 0.19  |
| MRPS26   | 1.039  | 5.15  |
| MRPS27   | 2.631  | 18.01 |
| MRPS28   | 0.707  | 4.2   |
| MRPS29P1 | 3.385  | 0.15  |
| MRPS29P2 | 0.515  | 5.38  |
| MRPS30   | 1.67   | 9.42  |
| MRPS31   | 1.284  | 3.23  |
| MRPS31P1 | 0.213  | 0     |
| MRPS31P2 | 16.253 | 0.12  |
| MRPS33   | 2.503  | 8.74  |
| MRPS33P1 | 0.167  | 0     |
| MRPS33P2 | 0.322  | 0.92  |
| MRPS33P3 | 0.322  | 0     |
| MRPS33P4 | 0.252  | 0     |
| MRPS34   | 1.003  | 10.75 |
| MRPS35   | 1.865  | 8.43  |
| MRPS35P1 | 0.128  | 0     |
| MRPS35P2 | 0.179  | 0     |
| MRPS35P3 | 0.539  | 0     |
| MRPS36   | 2.658  | 1.56  |
| MRPS36P1 | 0.31   | 8.62  |
| MRPS36P2 | 0.103  | 0     |
| MRPS36P3 | 0.133  | 0     |
| MRPS36P4 | 0.302  | 0     |
| MRPS36P5 | 0.302  | 0     |
| MRPS36P6 | 0.221  | 0.44  |
| MRPS5    | 1.661  | 6.37  |
| MRPS5P3  | 1.304  | 0.98  |
| MRPS5P4  | 0.338  | 0     |
| MRPS6    | 0.986  | 11.04 |
| MRPS6P1  | 0.364  | 0     |
| MRPS6P2  | 0.374  | 0     |
| MRPS6P4  | 0.308  | 0     |
| MRPS7    | 1.371  | 11.62 |
| MRPS7P1  | 0.705  | 0     |
| MRPS7P2  | 1.049  | 0.19  |
| MRPS9    | 1.435  | 7.58  |
| MRRF     | 2.676  | 3.7   |
| MRS2L    | 3.348  | 1.68  |
| MRTO4    | 1.185  | 3.51  |
| MRVI1    | 3.959  | 0.18  |
| MS4A1    | 3.61   | 30.64 |
| MS4A10   | 2.296  | 0     |
| MS4A12   | 1.167  | 0     |
| MS4A13   | 0.928  | 0     |
| MS4A2    | 3.725  | 0     |
| MS4A3    | 1.817  | 0.38  |
| MS4A4A   | 1.811  | 0.87  |

|        |        |        |
|--------|--------|--------|
| MS4A5  | 0.722  | 0      |
| MS4A6A | 3.024  | 0.95   |
| MS4A6E | 0.66   | 0.3    |
| MS4A7  | 3.141  | 0.76   |
| MS4A8B | 1.353  | 0      |
| MSC    | 1.931  | 0.11   |
| MSGN1  | 0.582  | 0.17   |
| MSH2   | 3.145  | 1.64   |
| MSH3   | 4.62   | 0.9    |
| MSH4   | 3.203  | 0.06   |
| MSH5   | 8.711  | 0.84   |
| MSH6   | 4.263  | 21.54  |
| MSI1   | 2.95   | 0.03   |
| MSI2   | 9.352  | 38.66  |
| MSL-1  | 8.202  | 6.83   |
| MSL2L1 | 4.696  | 12.96  |
| MSL3L1 | 6.581  | 6.21   |
| MSLN   | 2.219  | 0.04   |
| MSMB   | 0.897  | 0      |
| MSN    | 4.169  | 137.29 |
| MSNL1  | 3.864  | 16.11  |
| MSR1   | 5.35   | 0      |
| MSRA   | 1.482  | 8.75   |
| MSRB2  | 0.908  | 1.53   |
| MSRB3  | 4.51   | 0.07   |
| MST1   | 2.223  | 2.67   |
| MST101 | 3.491  | 1.53   |
| MST150 | 2.747  | 98.03  |
| MST1R  | 4.536  | 0.11   |
| MSTO1  | 2.44   | 5.92   |
| MSTP2  | 0.4    | 0.25   |
| MSTP7  | 0.411  | 0      |
| MSTP9  | 13.517 | 0.15   |
| MSX1   | 1.933  | 0.61   |
| MSX2   | 2.208  | 0      |
| MSX2P  | 2.162  | 0      |
| MT1A   | 0.396  | 0      |
| MT1B   | 0.38   | 0      |
| MT1DP  | 0.435  | 0      |
| MT1E   | 0.506  | 6.65   |
| MT1F   | 0.438  | 1.13   |
| MT1G   | 0.396  | 1.25   |
| MT1H   | 0.349  | 0      |
| MT1JP  | 1.762  | 0      |
| MT1L   | 1.118  | 0.09   |
| MT1M   | 0.397  | 1      |
| MT1P1  | 0.399  | 0      |
| MT1P2  | 0.52   | 0      |
| MT1P3  | 0.339  | 3.5    |
| MT1X   | 0.391  | 89.58  |

|         |       |        |
|---------|-------|--------|
| MT2A    | 0.372 | 107.18 |
| MT2P1   | 0.186 | 11.7   |
| MT3     | 0.582 | 0      |
| MT4     | 0.189 | 0      |
| MTA1    | 3.856 | 22.48  |
| MTA2    | 3.235 | 27.93  |
| MTA3    | 1.857 | 5.11   |
| MTAC2D1 | 4.604 | 0.3    |
| MTAP    | 4.922 | 0.62   |
| MTBP    | 3.059 | 0.55   |
| MTCH1   | 3.289 | 122.04 |
| MTCH2   | 2.474 | 7.03   |
| MTCO1P2 | 1.03  | 109.41 |
| MTCO2L  | 0.477 | 0      |
| MTCP1   | 3.485 | 1.53   |
| MTDH    | 3.717 | 16.24  |
| MTERF   | 4.326 | 1.1    |
| MTERFD1 | 1.406 | 2.89   |
| MTERFD2 | 4.545 | 10.36  |
| MTERFD3 | 1.876 | 2.75   |
| MTF1    | 3.301 | 1.98   |
| MTF2    | 2.819 | 13.9   |
| MTFMT   | 1.736 | 0.97   |
| MTFR1   | 2.635 | 0.3    |
| MTG1    | 1.614 | 5.15   |
| MTHFD1  | 3.11  | 3.11   |
| MTHFD1L | 3.598 | 1.57   |
| MTHFD2  | 2.589 | 1.52   |
| MTHFD2L | 2.453 | 0.2    |
| MTHFR   | 7.105 | 4.61   |
| MTHFS   | 0.857 | 1.27   |
| MTHFSD  | 2.308 | 2.49   |
| MTIF2   | 3.029 | 4.28   |
| MTIF2P1 | 1.587 | 0.31   |
| MTIF3   | 3.589 | 36.94  |
| MTL5    | 5.192 | 0.38   |
| MTM1    | 3.412 | 6.15   |
| MTMR1   | 4.121 | 13.62  |
| MTMR10  | 3.594 | 19.32  |
| MTMR11  | 2.324 | 0.12   |
| MTMR12  | 5.187 | 7.31   |
| MTMR14  | 2.945 | 22.58  |
| MTMR15  | 7.575 | 13.57  |
| MTMR2   | 4.997 | 3.07   |
| MTMR3   | 6.367 | 27.69  |
| MTMR4   | 5.785 | 5.15   |
| MTMR6   | 4.185 | 11.99  |
| MTMR7   | 3.85  | 0.72   |
| MTMR8   | 2.639 | 0.41   |
| MTMR9   | 7.406 | 1.03   |

|         |        |       |
|---------|--------|-------|
| MTND2P2 | 1.575  | 0     |
| MTNR1A  | 1.105  | 0     |
| MTNR1B  | 1.662  | 0     |
| MTO1    | 3.322  | 6.02  |
| MTP18   | 1.762  | 2.13  |
| MTPN    | 7.476  | 23.52 |
| MTR     | 7.102  | 4.39  |
| MTRF1   | 2.174  | 2.23  |
| MTRF1L  | 2.53   | 3.44  |
| MTRR    | 3.482  | 3.49  |
| MTSS1   | 11.305 | 40    |
| MTTP    | 3.392  | 0     |
| MTUS1   | 9.7    | 0.36  |
| MTX1    | 1.768  | 6.32  |
| MTX1P   | 3.461  | 5.03  |
| MTX2    | 1.839  | 0.7   |
| MTX3    | 6.155  | 1.77  |
| MUC1    | 1.969  | 1.4   |
| MUC12   | 9.166  | 9.05  |
| MUC13   | 2.861  | 0.04  |
| MUC15   | 2.084  | 0     |
| MUC16   | 43.816 | 0.01  |
| MUC17   | 28.7   | 0.19  |
| MUC19   | 21.987 | 0.02  |
| MUC2    | 5.903  | 0     |
| MUC20   | 1.828  | 6.77  |
| MUC3B   | 3.749  | 0     |
| MUC4    | 8.671  | 16.22 |
| MUC5AC  | 3.811  | 0.03  |
| MUC5B   | 17.695 | 0.05  |
| MUC6    | 6.214  | 0.43  |
| MUC7    | 2.341  | 0     |
| MUCDHL  | 3.125  | 0.06  |
| MUM1    | 4.179  | 1.16  |
| MUM1L1  | 3.957  | 0     |
| MUS81   | 2.319  | 4.52  |
| MUSK    | 2.666  | 0     |
| MUSTN1  | 1.725  | 11.87 |
| MUT     | 2.776  | 3.49  |
| MUTED   | 2.27   | 0.78  |
| MUTYH   | 1.839  | 4.46  |
| MVD     | 1.795  | 10.59 |
| MVK     | 1.952  | 0.3   |
| MVP     | 2.873  | 20.76 |
| MX1     | 2.787  | 3.76  |
| MX2     | 2.961  | 0.87  |
| MXD1    | 5.587  | 4.39  |
| MXD3    | 1.049  | 11.88 |
| MXD4    | 8.79   | 41.92 |
| MXI1    | 3.968  | 9.15  |

|         |        |        |
|---------|--------|--------|
| MXRA5   | 9.638  | 0      |
| MXRA7   | 5.207  | 11.04  |
| MXRA8   | 2.273  | 3.18   |
| MYADM   | 3.769  | 46.62  |
| MYADML  | 1.949  | 0      |
| MYB     | 4.338  | 48.6   |
| MYBBP1A | 5.537  | 6.86   |
| MYBL1   | 5.698  | 0.66   |
| MYBL2   | 2.713  | 7.84   |
| MYBPC1  | 4.033  | 0      |
| MYBPC2  | 3.561  | 0.36   |
| MYBPC3  | 4.2    | 0.14   |
| MYBPH   | 1.806  | 0      |
| MYBPHL  | 1.372  | 0      |
| MYC     | 2.359  | 3.98   |
| MYCBP   | 2.093  | 2.12   |
| MYCBP2  | 14.734 | 4.54   |
| MYCBPAP | 3.123  | 0.16   |
| MYCL1   | 5.66   | 0      |
| MYCL2   | 1.077  | 0      |
| MYCL3   | 1.13   | 0      |
| MYCN    | 2.605  | 0.04   |
| MYCT1   | 1.083  | 0      |
| MYD88   | 2.814  | 7.7    |
| MYEF2   | 4.543  | 0.11   |
| MYEOV   | 2.287  | 0      |
| MYEOV2  | 0.969  | 13.88  |
| MYF5    | 1.427  | 0      |
| MYF6    | 1.294  | 0.15   |
| MYH1    | 5.925  | 0      |
| MYH10   | 7.619  | 2.82   |
| MYH11   | 7.931  | 0.22   |
| MYH13   | 5.992  | 0      |
| MYH14   | 7.386  | 1.1    |
| MYH15   | 7.075  | 0      |
| MYH16   | 53.879 | 0.01   |
| MYH2    | 6.046  | 0      |
| MYH3    | 6.025  | 0.39   |
| MYH4    | 6.016  | 0      |
| MYH6    | 5.94   | 0      |
| MYH7    | 6.008  | 0      |
| MYH7B   | 6.289  | 0.33   |
| MYH8    | 6.016  | 0      |
| MYH9    | 9.182  | 136.65 |
| MYL1    | 1.144  | 0      |
| MYL2    | 0.787  | 0      |
| MYL3    | 0.877  | 0      |
| MYL4    | 0.983  | 0.3    |
| MYL5    | 0.661  | 6.74   |
| MYL6    | 2.639  | 146.7  |



|         |        |       |
|---------|--------|-------|
| MYL6B   | 0.869  | 34.38 |
| MYL6P   | 0.645  | 11.97 |
| MYL7    | 2.175  | 14.65 |
| MYL9    | 1.187  | 16.42 |
| MYLC2PL | 1.362  | 0     |
| MYLIP   | 3.493  | 24.75 |
| MYLK    | 12.152 | 2.22  |
| MYLK2   | 2.683  | 0.07  |
| MYLPF   | 0.655  | 0.6   |
| MYNN    | 3.134  | 2.93  |
| MYO10   | 8.808  | 28.55 |
| MYO15A  | 11.863 | 0.04  |
| MYO15B  | 2.908  | 7.11  |
| MYO16   | 6.874  | 0     |
| MYO18A  | 8.636  | 35.92 |
| MYO18B  | 8.565  | 0.07  |
| MYO1A   | 3.613  | 0     |
| MYO1B   | 4.825  | 2.95  |
| MYO1C   | 4.316  | 2.09  |
| MYO1D   | 5.182  | 0.02  |
| MYO1E   | 4.715  | 0.04  |
| MYO1F   | 3.827  | 3.49  |
| MYO1G   | 6.484  | 7.81  |
| MYO3A   | 5.584  | 0.48  |
| MYO3B   | 5.56   | 0     |
| MYO5A   | 6.396  | 2.94  |
| MYO5B   | 9.508  | 0.01  |
| MYO5C   | 6.828  | 9.35  |
| MYO6    | 8.662  | 0.04  |
| MYO7A   | 7.462  | 5.99  |
| MYO7B   | 6.715  | 0.16  |
| MYO9A   | 8.459  | 0.52  |
| MYO9B   | 7.459  | 12.85 |
| MYOC    | 2.045  | 0.1   |
| MYOCD   | 2.817  | 0     |
| MYOD1   | 1.806  | 0     |
| MYOG    | 1.53   | 0     |
| MYOHD1  | 5.616  | 5.65  |
| MYOM1   | 5.847  | 0.19  |
| MYOM2   | 4.921  | 0.08  |
| MYOM3   | 4.856  | 0     |
| MYOT    | 2.244  | 0.22  |
| MYOZ1   | 1.541  | 0.45  |
| MYOZ2   | 2.508  | 0     |
| MYOZ3   | 3.443  | 0.03  |
| MYPN    | 5.699  | 0     |
| MYRIP   | 5.173  | 5.13  |
| MYSM1   | 3.546  | 9.63  |
| MYST1   | 1.518  | 23.27 |
| MYST2   | 3.556  | 21.25 |

|          |        |        |
|----------|--------|--------|
| MYST3    | 7.86   | 57.62  |
| MYST4    | 6.734  | 10.39  |
| MYT1     | 5.535  | 0.27   |
| MYT1L    | 7.136  | 0.05   |
| MZF1     | 3.124  | 3.93   |
| N4BP1    | 7.106  | 7.72   |
| N4BP2    | 6.598  | 3.12   |
| N4BP3    | 5.987  | 1.88   |
| N6AMT1   | 4.865  | 0.04   |
| N6AMT2   | 0.875  | 0.12   |
| NAALAD2  | 3.129  | 0.04   |
| NAALADL1 | 2.687  | 0.33   |
| NAALADL2 | 4.912  | 0      |
| NAB1     | 4.469  | 3.17   |
| NAB2     | 2.498  | 1.11   |
| NACA     | 1.059  | 452.65 |
| NACAL    | 0.777  | 185.14 |
| NACAP1   | 0.703  | 13.65  |
| NADK     | 3.235  | 8.93   |
| NADSYN1  | 2.433  | 20.82  |
| NAG      | 7.282  | 2.85   |
| NAG18    | 1.582  | 3.13   |
| NAG6     | 8.336  | 0.17   |
| NAG8     | 5.139  | 0.2    |
| NAGA     | 3.606  | 3.13   |
| NAGK     | 1.535  | 12.7   |
| NAGLU    | 2.783  | 2.06   |
| NAGPA    | 2.203  | 3.01   |
| NAGS     | 2.072  | 0.04   |
| NAIP     | 10.452 | 0.01   |
| NANOG    | 2.098  | 0      |
| NANOGP1  | 26.133 | 0.03   |
| NANOGP10 | 1.816  | 0      |
| NANOGP11 | 0.401  | 0      |
| NANOGP2  | 1.484  | 0      |
| NANOGP3  | 0.689  | 0      |
| NANOGP4  | 3.599  | 0.36   |
| NANOGP5  | 1.984  | 0      |
| NANOGP6  | 0.941  | 0      |
| NANOGP7  | 1.565  | 0      |
| NANOGP8  | 2.14   | 0      |
| NANOGP9  | 1.513  | 0.13   |
| NANOS1   | 8.476  | 0.57   |
| NANOS2   | 1.565  | 0      |
| NANOS3   | 0.949  | 0.11   |
| NANP     | 2.337  | 0.8    |
| NANS     | 1.17   | 15.81  |
| NAP1L1   | 5.136  | 54.78  |
| NAP1L2   | 2.531  | 0.08   |
| NAP1L3   | 2.68   | 0      |

|           |        |       |
|-----------|--------|-------|
| NAP1L4    | 6.354  | 17.91 |
| NAP1L5    | 1.914  | 3.1   |
| NAP1L6    | 2.044  | 0     |
| NAPA      | 1.842  | 24.34 |
| NAPB      | 3.787  | 2.4   |
| NAPE-PLD  | 9.674  | 5.16  |
| NAPG      | 1.507  | 8.08  |
| NAPRT1    | 1.857  | 10.28 |
| NAPSA     | 1.392  | 1.56  |
| NAPSB     | 12.279 | 16.7  |
| NARF      | 3.244  | 18.05 |
| NARFL     | 4.887  | 31.54 |
| NARG1     | 5.554  | 5.29  |
| NARG1L    | 4.754  | 5.45  |
| NARG2     | 7.564  | 1.52  |
| NARS      | 3.241  | 23.94 |
| NARS2     | 2.098  | 2.21  |
| NARSP     | 3.256  | 0.09  |
| NASP      | 4.996  | 22.71 |
| NASPP1    | 3.031  | 4.9   |
| NAT1      | 1.424  | 0.84  |
| NAT10     | 4.002  | 9.15  |
| NAT11     | 3.308  | 5.98  |
| NAT12     | 2.892  | 2.5   |
| NAT13     | 3.576  | 26.15 |
| NAT14     | 1.313  | 4.29  |
| NAT2      | 1.276  | 0     |
| NAT5      | 1.746  | 7.48  |
| NAT6      | 1.195  | 2.82  |
| NAT8      | 0.954  | 0     |
| NAT8B     | 0.83   | 0     |
| NAT8L     | 2.342  | 0     |
| NAT9      | 1.875  | 16.3  |
| NAV1      | 12.132 | 13.01 |
| NAV2      | 11.14  | 2.06  |
| NAV3      | 9.63   | 0     |
| NBEA      | 10.792 | 0.16  |
| NBEAL1    | 4.656  | 0.12  |
| NBEAL2    | 9.262  | 18.61 |
| NBL1      | 2.18   | 2.31  |
| NBLA00301 | 1.599  | 0     |
| NBN       | 4.967  | 7.15  |
| NBPF1     | 4.288  | 0.67  |
| NBPF11    | 5.541  | 1.71  |
| NBPF13P   | 39.878 | 0.02  |
| NBPF14    | 3.689  | 0.77  |
| NBPF15    | 4.02   | 0.96  |
| NBPF17P   | 64.487 | 0.01  |
| NBPF18P   | 9.839  | 0     |
| NBPF20    | 2.931  | 0.24  |

|         |        |       |
|---------|--------|-------|
| NBPF21P | 21.789 | 0     |
| NBPF2P  | 4.853  | 0.06  |
| NBPF3   | 3.766  | 0.44  |
| NBPF4   | 2.817  | 0     |
| NBPF6   | 2.982  | 0     |
| NBPF7   | 1.887  | 0     |
| NBPF8   | 2.92   | 0.88  |
| NBPF9   | 2.181  | 0     |
| NBR1    | 2.908  | 1.36  |
| NBR2    | 1.368  | 1.95  |
| NCALD   | 3.279  | 0.82  |
| NCAM1   | 4.243  | 0.04  |
| NCAM2   | 3.699  | 0     |
| NCAN    | 6.289  | 0     |
| NCAPD2  | 4.486  | 4.41  |
| NCAPD3  | 6.037  | 3.88  |
| NCAPG   | 4.664  | 1.59  |
| NCAPG2  | 10.506 | 0.74  |
| NCAPH   | 4.495  | 1.03  |
| NCAPH2  | 2.76   | 7.35  |
| NCBP1   | 3.059  | 6.11  |
| NCBP2   | 2.884  | 11.25 |
| NCDN    | 3.973  | 0.44  |
| NCF1    | 2.796  | 3.32  |
| NCF2    | 2.389  | 11.26 |
| NCF4    | 2.215  | 15.9  |
| NCK1    | 1.914  | 8.89  |
| NCK2    | 4.702  | 7.11  |
| NCKAP1  | 4.632  | 0.11  |
| NCKAP1L | 4.559  | 19.3  |
| NCKIPSD | 3.054  | 0.36  |
| NCL     | 3.099  | 89.36 |
| NCLN    | 4.718  | 33.97 |
| NCOA1   | 9.602  | 4.49  |
| NCOA2   | 6.439  | 5.36  |
| NCOA3   | 8.028  | 10.76 |
| NCOA4   | 3.487  | 41.34 |
| NCOA4P  | 3.043  | 0.91  |
| NCOA5   | 3.209  | 7.58  |
| NCOA6   | 7.062  | 4.72  |
| NCOA7   | 5.521  | 1.64  |
| NCOR1   | 10.814 | 5.12  |
| NCOR2   | 8.825  | 19.35 |
| NCR1    | 1.135  | 0.09  |
| NCR2    | 0.932  | 0     |
| NCR3    | 3.126  | 0     |
| NCSTN   | 2.935  | 17.66 |
| ND1     | 0.957  | 0     |
| ND2     | 1.044  | 0     |
| ND3     | 0.346  | 0     |

|          |       |        |
|----------|-------|--------|
| ND4      | 1.378 | 0      |
| ND4L     | 0.297 | 0      |
| ND5      | 1.812 | 0      |
| ND6      | 0.525 | 0      |
| NDC80    | 2.072 | 3.16   |
| NDE1     | 1.981 | 8.09   |
| NDEL1    | 3.644 | 11.08  |
| NDFIP1   | 2.533 | 3.94   |
| NDFIP2   | 2.636 | 0.04   |
| NDN      | 1.897 | 0      |
| NDNL2    | 1.66  | 5.96   |
| NDOR1    | 2.683 | 8.15   |
| NDP      | 1.833 | 0      |
| NDRG1    | 4.287 | 55.39  |
| NDRG2    | 2.199 | 3.78   |
| NDRG3    | 2.964 | 3.71   |
| NDRG4    | 5.309 | 8.94   |
| NDST1    | 7.915 | 10.04  |
| NDST2    | 3.749 | 5.83   |
| NDST3    | 3.181 | 0      |
| NDST4    | 3.351 | 0      |
| NDUFA1   | 0.475 | 103.31 |
| NDUFA10  | 2.809 | 28.95  |
| NDUFA11  | 0.799 | 38.76  |
| NDUFA12  | 0.6   | 22.59  |
| NDUFA12L | 0.622 | 3.18   |
| NDUFA13  | 0.959 | 73.45  |
| NDUFA2   | 0.586 | 41.03  |
| NDUFA3   | 0.341 | 23.21  |
| NDUFA4   | 1.646 | 18.75  |
| NDUFA4L2 | 1.188 | 0.08   |
| NDUFA4P1 | 0.63  | 10.99  |
| NDUFA5   | 3.101 | 9.79   |
| NDUFA6   | 1.184 | 15.13  |
| NDUFA7   | 0.511 | 27.69  |
| NDUFA8   | 0.844 | 2.69   |
| NDUFA9   | 1.269 | 19.03  |
| NDUFA9P1 | 1.15  | 1.55   |
| NDUFAB1  | 0.667 | 20.91  |
| NDUFAF1  | 1.457 | 0.34   |
| NDUFB1   | 0.42  | 34.15  |
| NDUFB10  | 0.695 | 39.71  |
| NDUFB11  | 0.948 | 44.15  |
| NDUFB2   | 0.99  | 7.09   |
| NDUFB3   | 0.675 | 7.92   |
| NDUFB3P1 | 0.574 | 1.72   |
| NDUFB3P2 | 0.304 | 0      |
| NDUFB3P3 | 0.46  | 0      |
| NDUFB3P4 | 0.456 | 2.38   |
| NDUFB3P5 | 0.401 | 0      |

|          |        |        |
|----------|--------|--------|
| NDUFB4   | 0.527  | 61.77  |
| NDUFB5   | 1.059  | 12.61  |
| NDUFB6   | 0.862  | 3.79   |
| NDUFB7   | 0.543  | 57.21  |
| NDUFB8   | 1.033  | 37.64  |
| NDUFB8P1 | 0.658  | 0      |
| NDUFB9   | 0.703  | 60.23  |
| NDUFC1   | 0.412  | 24.02  |
| NDUFC2   | 2.138  | 7.91   |
| NDUFS1   | 3.417  | 8.77   |
| NDUFS2   | 2.042  | 17.49  |
| NDUFS3   | 1.627  | 30.04  |
| NDUFS4   | 0.653  | 30.15  |
| NDUFS5   | 0.511  | 103.77 |
| NDUFS6   | 2.337  | 24.51  |
| NDUFS7   | 1.702  | 16.57  |
| NDUFS8   | 0.779  | 23.37  |
| NDUFV1   | 2.276  | 55.73  |
| NDUFV2   | 2.87   | 40.89  |
| NDUFV2P1 | 1.181  | 37.11  |
| NDUFV3   | 2.13   | 2.32   |
| NEB      | 20.581 | 0.04   |
| NEBL     | 8.82   | 0      |
| NECAP1   | 2.564  | 21.65  |
| NECAP2   | 2.397  | 25.22  |
| NEDD1    | 2.36   | 3.86   |
| NEDD4    | 10.567 | 0.37   |
| NEDD4L   | 4.869  | 0.2    |
| NEDD8    | 0.606  | 43.75  |
| NEDD9    | 5.332  | 14.11  |
| NEFH     | 3.683  | 0      |
| NEFL     | 1.633  | 0      |
| NEFM     | 3.238  | 0      |
| NEGR1    | 5.669  | 4.55   |
| NEIL1    | 3.116  | 33.85  |
| NEIL2    | 2.661  | 3.6    |
| NEIL3    | 2.273  | 0.04   |
| NEK1     | 5.501  | 0.34   |
| NEK10    | 2.845  | 0      |
| NEK11    | 3.278  | 0.09   |
| NEK2     | 2.13   | 0.28   |
| NEK2P    | 2.064  | 0.04   |
| NEK3     | 2.509  | 10.73  |
| NEK4     | 3.696  | 3.51   |
| NEK5     | 2.912  | 0      |
| NEK6     | 2.582  | 2.95   |
| NEK7     | 1.512  | 11.71  |
| NEK8     | 2.858  | 0.55   |
| NEK9     | 3.244  | 4.12   |
| NELF     | 3.383  | 13.36  |

|          |        |       |
|----------|--------|-------|
| NELL1    | 3      | 0     |
| NELL2    | 3.196  | 0.25  |
| NENF     | 0.898  | 17.41 |
| NEO1     | 5.277  | 1.86  |
| NES      | 5.558  | 0     |
| NESPAS   | 1.156  | 0     |
| NET1     | 3.232  | 15.19 |
| NETO1    | 3.921  | 0     |
| NETO2    | 3.653  | 0.13  |
| NEU1     | 5.766  | 0     |
| NEU2     | 1.143  | 0     |
| NEU3     | 3.519  | 2.28  |
| NEU4     | 2.302  | 6.23  |
| NEURL    | 3.996  | 0.17  |
| NEURL2   | 1.259  | 0.08  |
| NEUROD1  | 2.502  | 0.04  |
| NEUROD2  | 2.018  | 0.1   |
| NEUROD4  | 1.481  | 0     |
| NEUROD6  | 4.314  | 0     |
| NEUROG1  | 1.668  | 0     |
| NEUROG2  | 2.287  | 0     |
| NEUROG3  | 1.167  | 0     |
| NEXN     | 2.131  | 1.81  |
| NF1      | 8.959  | 2.71  |
| NF2      | 10.998 | 1.89  |
| NFAM1    | 3.04   | 1.08  |
| NFASC    | 10.079 | 0.02  |
| NFAT5    | 16.904 | 3.08  |
| NFATC1   | 9.681  | 6.74  |
| NFATC2   | 3.708  | 4.35  |
| NFATC2IP | 3.877  | 7.12  |
| NFATC3   | 6.725  | 7.32  |
| NFATC4   | 4.901  | 0     |
| NFE2     | 1.658  | 2.2   |
| NFE2L1   | 4.749  | 25.88 |
| NFE2L2   | 2.408  | 36.77 |
| NFE2L3   | 5.698  | 0.12  |
| NFIA     | 2.653  | 0.41  |
| NFIB     | 8.159  | 0     |
| NFIC     | 3.344  | 7.13  |
| NFIL3    | 2.085  | 10.87 |
| NFIX     | 5.576  | 5     |
| NFKB1    | 4.087  | 11.33 |
| NFKB2    | 3.004  | 6.46  |
| NFKBIA   | 1.55   | 96    |
| NFKBIB   | 2.974  | 6.82  |
| NFKBIE   | 2.581  | 3.56  |
| NFKBIL1  | 4.392  | 0.03  |
| NFKBIL2  | 5.653  | 3.64  |
| NFKBIZ   | 4.7    | 13.85 |

|           |        |       |
|-----------|--------|-------|
| NFRKB     | 4.358  | 3.93  |
| NFS1      | 2.678  | 1.29  |
| NFU1      | 1.921  | 5     |
| NFX1      | 5.831  | 8.17  |
| NFXL1     | 3.728  | 0.64  |
| NFYA      | 2.805  | 10.68 |
| NFYB      | 3.482  | 1.57  |
| NFYC      | 2.259  | 10.6  |
| NGB       | 1.876  | 0     |
| NGDN      | 3.9    | 11.23 |
| NGEF      | 3.156  | 0     |
| NGFB      | 1.049  | 0     |
| NGFR      | 3.387  | 2.77  |
| NGFRAP1   | 1.837  | 0.32  |
| NGFRAP1L1 | 0.857  | 0     |
| NGLY1     | 2.442  | 20.87 |
| NGRN      | 2.085  | 6.84  |
| NHEDC1    | 1.859  | 0.11  |
| NHEJ1     | 2.037  | 4.08  |
| NHLH1     | 2.513  | 0.2   |
| NHLH2     | 2.512  | 0     |
| NHLRC1    | 2.134  | 0     |
| NHLRC2    | 2.55   | 4.31  |
| NHN1      | 4.117  | 21.24 |
| NHP2L1    | 2.3    | 41.64 |
| NHS       | 8.761  | 0     |
| NHSL1     | 10.115 | 0.72  |
| NIBP      | 4.472  | 5.33  |
| NICN1     | 3.227  | 4.17  |
| NICN2P    | 2.322  | 0.09  |
| NID1      | 4.89   | 0.1   |
| NID2      | 5.046  | 0.55  |
| NIF3L1    | 1.591  | 2.18  |
| NIN       | 11.878 | 7.79  |
| NINJ1     | 1.272  | 42.78 |
| NINJ2     | 1.062  | 0.46  |
| NIP30     | 2.691  | 22.65 |
| NIP7      | 2.184  | 9.1   |
| NIPA1     | 6.565  | 1.64  |
| NIPA2     | 2.57   | 11.98 |
| NIPBL     | 10.631 | 11.14 |
| NIPSNAP1  | 2.236  | 7.83  |
| NIPSNAP3A | 1.635  | 6.72  |
| NIPSNAP3B | 1.752  | 1.3   |
| NISCH     | 6.033  | 20.96 |
| NIT1      | 1.362  | 5.66  |
| NIT2      | 0.98   | 5.15  |
| NKAP      | 1.575  | 3.39  |
| NKD1      | 2.586  | 0     |
| NKD2      | 1.798  | 3.41  |



|         |       |       |
|---------|-------|-------|
| NKG7    | 0.826 | 46.59 |
| NKIRAS1 | 1.995 | 2.68  |
| NKIRAS2 | 3.076 | 7.5   |
| NKPD1   | 4.407 | 17.26 |
| NKRF    | 3.218 | 2.86  |
| NKTR    | 10.3  | 35.4  |
| NKX1-1  | 2.94  | 0     |
| NKX1-2  | 0.75  | 0     |
| NKX2-2  | 2.092 | 0     |
| NKX2-3  | 1.98  | 0     |
| NKX2-5  | 1.585 | 0     |
| NKX2-6  | 0.684 | 0     |
| NKX2-8  | 1.803 | 0     |
| NKX3-1  | 3.259 | 0.09  |
| NKX6-1  | 1.116 | 0     |
| NKX6-2  | 0.834 | 0     |
| NKX6-3  | 0.551 | 0     |
| NLE1    | 3.035 | 2.25  |
| NLF1    | 1.406 | 0     |
| NLF2    | 1.312 | 0     |
| NLGN1   | 4.918 | 0     |
| NLGN2   | 4.642 | 0.38  |
| NLGN3   | 3.895 | 2.84  |
| NLGN4X  | 5.815 | 0.02  |
| NLGN4Y  | 5.31  | 0.02  |
| NLK     | 4.055 | 1.97  |
| NLN     | 2.881 | 0.13  |
| NLRC3   | 3.415 | 0.78  |
| NLRC4   | 3.363 | 0.09  |
| NLRC5   | 6.793 | 30.88 |
| NLRP1   | 7.096 | 28.91 |
| NLRP10  | 2.02  | 0     |
| NLRP11  | 3.422 | 0     |
| NLRP12  | 5.522 | 0.07  |
| NLRP13  | 3.132 | 0     |
| NLRP14  | 3.521 | 0     |
| NLRP2   | 3.515 | 0     |
| NLRP2P  | 3.503 | 0     |
| NLRP3   | 4.461 | 1.07  |
| NLRP3P  | 1.745 | 0     |
| NLRP4   | 3.313 | 0     |
| NLRP5   | 3.836 | 0     |
| NLRP6   | 2.679 | 0.74  |
| NLRP7   | 3.529 | 0     |
| NLRP8   | 3.934 | 0     |
| NLRP9   | 3.484 | 0.03  |
| NLRP9P  | 3.836 | 0     |
| NLRX1   | 3.94  | 3.01  |
| NMB     | 1.306 | 0.91  |
| NMBR    | 1.354 | 0     |

|           |       |       |
|-----------|-------|-------|
| NMD3      | 2.898 | 7.41  |
| NME1      | 1.161 | 5.2   |
| NME1-NME2 | 1.052 | 68.09 |
| NME2      | 1.566 | 40.87 |
| NME2P1    | 0.693 | 55.11 |
| NME3      | 1.014 | 14.15 |
| NME4      | 1.007 | 27.41 |
| NME5      | 1.226 | 0.08  |
| NME6      | 1.182 | 1.67  |
| NME7      | 2.192 | 0.22  |
| NMI       | 1.42  | 8.08  |
| NMNAT1    | 1.818 | 0.32  |
| NMNAT2    | 5.861 | 0     |
| NMNAT3    | 1.863 | 0     |
| NMNATP    | 1.067 | 0     |
| NMRAL1    | 1.358 | 5.83  |
| NMS       | 0.485 | 0     |
| NMT1      | 4.886 | 7.96  |
| NMT2      | 2.837 | 2.44  |
| NMU       | 0.816 | 0     |
| NMUR1     | 3.299 | 0.06  |
| NMUR2     | 2.041 | 0     |
| NNAT      | 1.304 | 5.23  |
| NNMT      | 1.578 | 0.06  |
| NNT       | 5.484 | 6.33  |
| NO145     | 3.13  | 0.16  |
| NOB1      | 1.716 | 20.41 |
| NOBOX     | 2.946 | 0     |
| NOC2L     | 3.039 | 9.76  |
| NOC3L     | 3.436 | 0.55  |
| NOC4L     | 1.632 | 6.3   |
| NOD1      | 9.457 | 12.93 |
| NOD2      | 4.485 | 0.4   |
| NODAL     | 1.665 | 0.47  |
| NOG       | 1.273 | 0.15  |
| NOL1      | 2.837 | 3.14  |
| NOL10     | 3.331 | 3.89  |
| NOL11     | 2.454 | 5.92  |
| NOL12     | 2.84  | 3.45  |
| NOL14     | 2.918 | 6.54  |
| NOL3      | 1.384 | 1.43  |
| NOL4      | 2.621 | 0     |
| NOL5A     | 1.937 | 10.93 |
| NOL6      | 5.713 | 2.83  |
| NOL7      | 0.874 | 22.3  |
| NOL8      | 4.281 | 4.92  |
| NOL9      | 2.837 | 5.09  |
| NOLA1     | 1.303 | 4.25  |
| NOLA2     | 1.231 | 24.19 |
| NOLA2P1   | 0.758 | 11.48 |

|            |        |         |
|------------|--------|---------|
| NOLA3      | 1.153  | 28.66   |
| NOLC1      | 2.759  | 6.1     |
| NOM1       | 12.157 | 0.98    |
| NOMO1      | 4.247  | 1.49    |
| NOMO2      | 4.566  | 0.76    |
| NOMO3      | 4.253  | 0.46    |
| NONO       | 4.187  | 107.4   |
| NOP5/NOP58 | 1.965  | 33.18   |
| NOPE       | 6.485  | 0       |
| NOS1       | 7.126  | 0       |
| NOS1AP     | 2.891  | 0.13    |
| NOS2A      | 4.371  | 4.3     |
| NOS3       | 8.648  | 0.15    |
| NOSIP      | 1.098  | 14.42   |
| NOSTRIN    | 1.831  | 0.16    |
| NOTCH1     | 9.298  | 3.39    |
| NOTCH2     | 11.425 | 5.45    |
| NOTCH2NL   | 1.874  | 8.66    |
| NOTCH3     | 8.071  | 0.1     |
| NOTCH4     | 20.241 | 0.05    |
| NOTO       | 0.837  | 0       |
| NOTUM      | 2.218  | 0       |
| NOV        | 2.369  | 1       |
| NOVA1      | 4.291  | 0       |
| NOVA2      | 1.857  | 0       |
| NOX1       | 2.969  | 0       |
| NOX3       | 2.044  | 0.04    |
| NOX4       | 2.388  | 0       |
| NOX5       | 2.582  | 0.73    |
| NOXA1      | 1.633  | 0.73    |
| NOXO1      | 1.691  | 0.18    |
| NP         | 1.428  | 4.57    |
| N-PAC      | 3.99   | 13.02   |
| NPAL1      | 2.194  | 0       |
| NPAL2      | 2.255  | 1.54    |
| NPAL3      | 5.292  | 0.75    |
| NPAS1      | 2.043  | 0       |
| NPAS2      | 4.004  | 0.07    |
| NPAS3      | 3.55   | 0.03    |
| NPAS4      | 3.302  | 0       |
| NPAT       | 5.87   | 2.52    |
| NPB        | 0.378  | 0       |
| NPBWR1     | 0.987  | 0       |
| NPBWR2     | 1.002  | 0.29    |
| NPC1       | 0.1    | 1251.55 |
| NPC1L1     | 10.096 | 0.06    |
| NPC2       | 0.897  | 40.26   |
| NPDC1      | 4.099  | 41.81   |
| NPEPL1     | 2.186  | 16.7    |
| NPEPPS     | 4.172  | 9.58    |

|         |       |        |
|---------|-------|--------|
| NPFF    | 0.592 | 3.84   |
| NPFFR1  | 1.292 | 0      |
| NPFFR2  | 2.291 | 0      |
| NPHP1   | 4.231 | 0.12   |
| NPHP3   | 5.37  | 2.34   |
| NPHP4   | 5.002 | 1.4    |
| NPHS1   | 4.285 | 0.03   |
| NPHS2   | 1.853 | 0      |
| NPPI    | 1.07  | 1.38   |
| NPL     | 1.552 | 0      |
| NPLOC4  | 0.1   | 1247.6 |
| NPM1    | 1.69  | 96.01  |
| NPM1P1  | 0.49  | 0.2    |
| NPM1P12 | 2.522 | 0.24   |
| NPM1P13 | 2.502 | 0.11   |
| NPM1P14 | 3.188 | 0.12   |
| NPM1P17 | 0.914 | 0      |
| NPM1P18 | 2.37  | 0.63   |
| NPM1P19 | 1.107 | 0.36   |
| NPM1P20 | 1.37  | 0.07   |
| NPM1P3  | 1.313 | 3.24   |
| NPM1P5  | 0.919 | 1.29   |
| NPM1P6  | 0.84  | 0.47   |
| NPM1P9  | 1.283 | 0.54   |
| NPM2    | 1.1   | 0.09   |
| NPM3    | 0.865 | 5.15   |
| NPNT    | 4.584 | 0      |
| NPPA    | 0.84  | 1.06   |
| NPPB    | 0.698 | 0      |
| NPPC    | 0.381 | 1.3    |
| NPR1    | 4.232 | 8.49   |
| NPR2    | 3.43  | 0.52   |
| NPR3    | 2.646 | 0      |
| NPSR1   | 3.648 | 0      |
| NPTN    | 2.441 | 2.72   |
| NPTX1   | 5.437 | 0.36   |
| NPTX2   | 5.4   | 0.02   |
| NPTXR   | 5.814 | 0      |
| NPVF    | 2.38  | 0      |
| NPW     | 0.829 | 0.72   |
| NPY     | 1.102 | 8.17   |
| NPY1R   | 2.759 | 0      |
| NPY2R   | 3.625 | 0      |
| NPY5R   | 1.843 | 0      |
| NPY6R   | 1.953 | 0.15   |
| NQO1    | 2.591 | 0.04   |
| NQO2    | 0.975 | 0.3    |
| NR0B1   | 1.536 | 0      |
| NR0B2   | 1.16  | 0      |
| NR1D1   | 2.766 | 2.14   |

|       |        |       |
|-------|--------|-------|
| NR1D2 | 4.331  | 6.05  |
| NR1H2 | 2.021  | 32.46 |
| NR1H3 | 1.528  | 1.42  |
| NR1H4 | 2.143  | 0     |
| NR1I2 | 4.943  | 0     |
| NR1I3 | 1.335  | 0.29  |
| NR2C1 | 2.632  | 9.14  |
| NR2C2 | 8.33   | 13.1  |
| NR2E1 | 3.212  | 0     |
| NR2E3 | 2.917  | 0     |
| NR2F1 | 3.199  | 0     |
| NR2F2 | 3.019  | 0     |
| NR2F6 | 1.804  | 0.55  |
| NR3C1 | 10.262 | 14.18 |
| NR3C2 | 5.744  | 0.2   |
| NR4A1 | 4.51   | 27.16 |
| NR4A2 | 6.229  | 4.88  |
| NR4A3 | 8.363  | 0.26  |
| NR5A1 | 3.095  | 0.06  |
| NR5A2 | 5.046  | 0.2   |
| NR6A1 | 2.392  | 0.5   |
| NRAP  | 5.508  | 0     |
| NRAS  | 2.339  | 14.17 |
| NRBF2 | 1.848  | 5.41  |
| NRBP1 | 2.201  | 19.82 |
| NRBP2 | 3.491  | 6.6   |
| NRCAM | 13.938 | 0.05  |
| NRD1  | 3.821  | 12.95 |
| NRF1  | 7.258  | 4.81  |
| NRG1  | 7.723  | 0     |
| NRG2  | 3.103  | 0     |
| NRG3  | 2.091  | 0.1   |
| NRG4  | 0.667  | 0     |
| NRGN  | 1.299  | 0.61  |
| NRIP1 | 7.575  | 30.93 |
| NRIP2 | 2.745  | 1.51  |
| NRIP3 | 1.507  | 0.27  |
| NRK   | 8.061  | 0     |
| NRL   | 2.103  | 0.57  |
| NRM   | 4.257  | 0     |
| NRN1  | 2.819  | 46.36 |
| NRN1L | 0.633  | 2.19  |
| NRP1  | 7.164  | 20.02 |
| NRP2  | 8.09   | 1.98  |
| NRSN1 | 2.345  | 0     |
| NRSN2 | 1.974  | 1.46  |
| NRTN  | 1.104  | 1.97  |
| NRXN1 | 7.286  | 0     |
| NRXN2 | 7.393  | 0.51  |
| NRXN3 | 8.019  | 11.41 |

|         |        |       |
|---------|--------|-------|
| NSBP1   | 1.865  | 1.54  |
| NSD1    | 8.646  | 4.13  |
| NSDHL   | 1.563  | 3.42  |
| NSF     | 3.936  | 5.03  |
| NSFL1C  | 4.843  | 2.49  |
| NSL1    | 1.659  | 2.27  |
| NSMAF   | 3.552  | 7.44  |
| NSMCE1  | 1.062  | 9.6   |
| NSMCE2  | 1.194  | 8.62  |
| NSMCE4A | 1.565  | 9.98  |
| NSUN2   | 3.326  | 11.09 |
| NSUN3   | 1.435  | 1.86  |
| NSUN4   | 4.436  | 3.54  |
| NSUN5   | 4.27   | 3.06  |
| NSUN5B  | 3.916  | 3.28  |
| NSUN5C  | 3.78   | 2.1   |
| NSUN6   | 2.2    | 3.78  |
| NSUN7   | 3.546  | 0.36  |
| NT5C    | 0.941  | 13.78 |
| NT5C1A  | 1.107  | 0     |
| NT5C1B  | 2.862  | 0     |
| NT5C2   | 4.745  | 39.97 |
| NT5C3   | 4.028  | 5.13  |
| NT5C3L  | 1.446  | 6.91  |
| NT5C3P1 | 1.243  | 2.7   |
| NT5CP1  | 0.656  | 0.45  |
| NT5CP2  | 0.658  | 0.3   |
| NT5DC1  | 3.129  | 1.55  |
| NT5DC2  | 2.432  | 15.66 |
| NT5DC3  | 7.568  | 0.5   |
| NT5E    | 5.707  | 27.76 |
| NT5M    | 1.588  | 0.25  |
| NTAN1   | 1.112  | 10.14 |
| NTF3    | 1.2    | 0.41  |
| NTF5    | 0.999  | 0     |
| NTF6A   | 1.146  | 0     |
| NTF6B   | 1.19   | 0     |
| NTF6G   | 0.972  | 0     |
| NTHL1   | 1.067  | 10.67 |
| NTN1    | 1.99   | 0.44  |
| NTN2L   | 1.986  | 0     |
| NTN4    | 3.615  | 0     |
| NTNG1   | 2.932  | 0.27  |
| NTNG2   | 2.399  | 0.5   |
| NTRK1   | 2.857  | 0.24  |
| NTRK2   | 17.061 | 0     |
| NTRK3   | 5.095  | 0     |
| NTS     | 1.234  | 0     |
| NTSR1   | 4.131  | 0.03  |
| NTSR2   | 1.703  | 0     |

|          |       |        |
|----------|-------|--------|
| NUAK1    | 6.821 | 0.07   |
| NUAK2    | 3.401 | 3.06   |
| NUB1     | 9.083 | 10.79  |
| NUBP1    | 1.213 | 11.99  |
| NUBP2    | 1.35  | 14.22  |
| NUBPL    | 2.05  | 0.68   |
| NUCB1    | 2.25  | 35.53  |
| NUCB2    | 1.586 | 5.99   |
| NUCKS1   | 2.323 | 25.05  |
| NUDC     | 1.327 | 36.53  |
| NUDCD1   | 3.918 | 0.78   |
| NUDCD2   | 0.948 | 3.96   |
| NUDCD3   | 7.106 | 1.95   |
| NUDCP1   | 1.29  | 4.07   |
| NUDCP2   | 0.95  | 3.12   |
| NUDT1    | 2.795 | 13.59  |
| NUDT10   | 2.001 | 0      |
| NUDT11   | 2.396 | 0      |
| NUDT12   | 3.488 | 0.14   |
| NUDT13   | 2.104 | 2.87   |
| NUDT14   | 0.845 | 5.86   |
| NUDT15   | 2.022 | 2.2    |
| NUDT16   | 3.274 | 9.07   |
| NUDT16L1 | 1.313 | 10.25  |
| NUDT16P  | 5.441 | 0.05   |
| NUDT17   | 1.093 | 2.81   |
| NUDT18   | 2.251 | 2.24   |
| NUDT19   | 1.471 | 1.55   |
| NUDT2    | 1.102 | 2.43   |
| NUDT21   | 4.407 | 10.98  |
| NUDT22   | 1.094 | 6.24   |
| NUDT3    | 4.103 | 20.91  |
| NUDT4    | 8.198 | 106.04 |
| NUDT4P1  | 2.565 | 140.71 |
| NUDT5    | 1.204 | 13.15  |
| NUDT6    | 1.39  | 0.36   |
| NUDT8    | 0.809 | 2.57   |
| NUDT9    | 2.035 | 3.84   |
| NUDT9P1  | 1.089 | 0      |
| NUF2     | 2.114 | 1.03   |
| NUFIP1   | 3.445 | 0.81   |
| NUFIP1P  | 1.679 | 1.06   |
| NUFIP2   | 4.999 | 13.42  |
| NUMA1    | 7.494 | 48.28  |
| NUMB     | 3.644 | 16.35  |
| NUMBL    | 3.561 | 1.83   |
| NUP107   | 3.124 | 12.03  |
| NUP133   | 4.17  | 7.62   |
| NUP153   | 6.013 | 25.13  |
| NUP155   | 4.613 | 5.43   |

|           |        |       |
|-----------|--------|-------|
| NUP160    | 5.383  | 4.8   |
| NUP188    | 5.689  | 5.98  |
| NUP205    | 12.474 | 3.18  |
| NUP210    | 7.191  | 6.06  |
| NUP210L   | 5.151  | 0.02  |
| NUP214    | 6.601  | 11.01 |
| NUP35     | 2.33   | 1.32  |
| NUP37     | 1.208  | 2.95  |
| NUP43     | 3.848  | 2.98  |
| NUP50     | 5.666  | 7.68  |
| NUP50P1   | 1.706  | 0.12  |
| NUP50P2   | 1.696  | 0.41  |
| NUP54     | 2.354  | 11.35 |
| NUP62     | 3.721  | 11.03 |
| NUP62CL   | 1.591  | 0     |
| NUP85     | 2.595  | 9.99  |
| NUP88     | 3.573  | 41.06 |
| NUP93     | 2.63   | 8.73  |
| NUP98     | 7.882  | 21.78 |
| NUPL1     | 4.467  | 4.68  |
| NUPL2     | 3.514  | 1.66  |
| NUPR1     | 0.693  | 0     |
| NUS1      | 2.619  | 6.34  |
| NUSAP1    | 2.75   | 5.29  |
| NUT       | 3.795  | 0.03  |
| NUTF2     | 0.886  | 20.88 |
| NUTF2P2   | 0.851  | 3.37  |
| NVL       | 3.064  | 3.65  |
| NWD1      | 8.393  | 0     |
| NXF1      | 4.065  | 40.86 |
| NXF2      | 2.947  | 0     |
| NXF3      | 1.896  | 0     |
| NXF4      | 25.344 | 0     |
| NXF5      | 2.691  | 0     |
| NXN       | 3.004  | 0.04  |
| NXPH1     | 5.842  | 0     |
| NXPH2     | 0.836  | 0     |
| NXPH3     | 1.918  | 7.48  |
| NXPH4     | 1.798  | 0     |
| NXT1      | 1.117  | 3.63  |
| NXT2      | 2.692  | 0.74  |
| NYD-SP18  | 3.436  | 0.09  |
| NYD-SP21  | 2.795  | 0.28  |
| NY-REN-7  | 1.966  | 0     |
| NY-SAR-48 | 1.549  | 1.15  |
| NYX       | 2.713  | 0     |
| OAF       | 1.862  | 0.91  |
| OAS1      | 2.564  | 0.38  |
| OAS2      | 6.919  | 0.39  |
| OAS3      | 6.627  | 2.11  |



|         |        |        |
|---------|--------|--------|
| OASL    | 2.735  | 0.11   |
| OAT     | 1.998  | 1.68   |
| OATL3   | 0.46   | 0      |
| OAZ1    | 2.698  | 116.46 |
| OAZ2    | 1.905  | 19.58  |
| OAZ3    | 0.886  | 0.22   |
| OBFC1   | 1.42   | 2.79   |
| OBFC2A  | 1.865  | 0.53   |
| OBFC2B  | 1.301  | 6.54   |
| OBP2A   | 0.676  | 0      |
| OBP2B   | 0.689  | 0      |
| OBSCN   | 20.402 | 0.26   |
| OBSL1   | 6.766  | 0.2    |
| OC90    | 1.434  | 0      |
| OCA2    | 3.136  | 0      |
| OCC-1   | 1.139  | 1.22   |
| OCEL1   | 1.091  | 1.08   |
| OCIAD1  | 2.008  | 23.5   |
| OCIAD2  | 0.942  | 5.04   |
| OCLM    | 0.884  | 1.12   |
| OCLN    | 5.278  | 0      |
| OCM     | 1.176  | 0      |
| OCRL    | 5.157  | 3.63   |
| ODAM    | 0.888  | 0      |
| ODC1    | 2.062  | 12.57  |
| ODF1    | 0.983  | 0      |
| ODF2    | 4.331  | 5.48   |
| ODF2L   | 2.53   | 2.85   |
| ODF3    | 1.284  | 0      |
| ODF3L1  | 1.193  | 0      |
| ODF4    | 1.149  | 0      |
| ODZ1    | 8.297  | 0.04   |
| ODZ2    | 9.964  | 0      |
| ODZ3    | 10.858 | 0      |
| ODZ4    | 1.419  | 0.14   |
| OFCC1   | 0.958  | 0      |
| OFD1    | 3.989  | 12.87  |
| OFD1P1  | 3.445  | 2.9    |
| OFDYP1  | 13.636 | 0      |
| OFDYP10 | 33.304 | 0      |
| OFDYP11 | 27.428 | 0      |
| OFDYP12 | 11.882 | 0      |
| OFDYP13 | 22.432 | 0      |
| OFDYP14 | 16.151 | 0      |
| OFDYP15 | 18.931 | 0      |
| OFDYP16 | 6.826  | 0      |
| OFDYP2  | 16.196 | 0      |
| OFDYP3  | 5.879  | 0      |
| OFDYP4  | 16.21  | 0      |
| OFDYP5  | 47.217 | 0      |

|         |        |       |
|---------|--------|-------|
| OFDYP6  | 64.714 | 0     |
| OFDYP7  | 19.22  | 0     |
| OFDYP8  | 33.474 | 0     |
| OFDYP9  | 33.477 | 0     |
| OGDH    | 9.763  | 1.31  |
| OGDHL   | 3.682  | 0     |
| OGFOD1  | 3.02   | 4.98  |
| OGFOD2  | 2.08   | 2.95  |
| OGFR    | 2.42   | 12.23 |
| OGFRL1  | 3.821  | 24.67 |
| OGG1    | 7.329  | 0.96  |
| OGN     | 3.209  | 0     |
| OGT     | 9.063  | 66.06 |
| OIP5    | 1.569  | 2.2   |
| OIT3    | 2.361  | 0.04  |
| OLAH    | 2.238  | 1.19  |
| OLFM1   | 3.687  | 0     |
| OLFM2   | 1.861  | 0     |
| OLFM3   | 3.217  | 0     |
| OLFM4   | 2.819  | 3.16  |
| OLFML1  | 2.706  | 0     |
| OLFML2A | 5.964  | 5.84  |
| OLFML2B | 3.16   | 0     |
| OLFML3  | 1.814  | 0     |
| OLIG1   | 2.154  | 0     |
| OLIG2   | 2.488  | 0     |
| OLIG3   | 2.196  | 0     |
| OLR1    | 2.462  | 0.04  |
| OMA1    | 1.909  | 0     |
| OMD     | 2.255  | 0     |
| OMG     | 1.87   | 0.84  |
| OMP     | 0.492  | 0.6   |
| ONECUT1 | 1.925  | 0     |
| ONECUT2 | 1.656  | 0.12  |
| ONECUT3 | 1.485  | 0.06  |
| OPA1    | 6.029  | 10.41 |
| OPA3    | 3.689  | 0.51  |
| OPCML   | 6.63   | 0     |
| OPHN1   | 7.35   | 1.21  |
| OPHN1P1 | 20.054 | 0     |
| OPLAH   | 3.92   | 0.25  |
| OPN1LW  | 1.223  | 0     |
| OPN1MW  | 1.095  | 0     |
| OPN1MW2 | 1.223  | 0     |
| OPN1SW  | 2.202  | 0.18  |
| OPN3    | 4.838  | 1.9   |
| OPN4    | 2.341  | 0     |
| OPN5    | 4.032  | 0     |
| OPRD1   | 1.774  | 0     |
| OPRK1   | 4.959  | 0     |

|          |       |       |
|----------|-------|-------|
| OPRL1    | 3.359 | 0.76  |
| OPRM1    | 2.948 | 0     |
| OPRS1    | 2.809 | 1.41  |
| OPTC     | 1.444 | 0     |
| OPTN     | 4.521 | 20.44 |
| OR10A2   | 0.912 | 0     |
| OR10A3   | 0.945 | 0     |
| OR10A4   | 0.948 | 0     |
| OR10A5   | 0.954 | 0     |
| OR10A6   | 0.945 | 0     |
| OR10A7   | 0.951 | 0     |
| OR10AA1P | 0.934 | 0     |
| OR10AB1P | 0.938 | 0     |
| OR10AC1P | 2.758 | 0     |
| OR10AD1  | 0.954 | 0     |
| OR10AE1P | 0.598 | 0     |
| OR10AE3P | 0.469 | 0     |
| OR10AF1P | 0.805 | 0     |
| OR10AG1  | 0.906 | 0     |
| OR10AH1P | 1.998 | 0.1   |
| OR10AK1P | 0.415 | 0     |
| OR10B1P  | 2.235 | 0     |
| OR10C1   | 2.817 | 0     |
| OR10D1P  | 0.933 | 0     |
| OR10D3P  | 0.936 | 0     |
| OR10D4P  | 1.297 | 0     |
| OR10D5P  | 0.934 | 0     |
| OR10G1P  | 1.142 | 0     |
| OR10G2   | 0.933 | 0     |
| OR10G3   | 0.942 | 0     |
| OR10G4   | 0.936 | 0     |
| OR10G5P  | 0.705 | 0     |
| OR10G6   | 0.759 | 0     |
| OR10G7   | 0.936 | 0     |
| OR10G8   | 0.936 | 0     |
| OR10G9   | 0.936 | 0     |
| OR10H1   | 0.957 | 0     |
| OR10H2   | 0.948 | 0     |
| OR10H3   | 0.951 | 0     |
| OR10H4   | 0.951 | 0     |
| OR10H5   | 0.948 | 0     |
| OR10J1   | 0.963 | 0     |
| OR10J2P  | 0.958 | 0     |
| OR10J3   | 0.99  | 0     |
| OR10J4P  | 0.932 | 0     |
| OR10J5   | 0.93  | 0     |
| OR10J6P  | 0.927 | 0     |
| OR10J7P  | 0.973 | 0     |
| OR10J8P  | 0.926 | 0     |
| OR10J9P  | 0.987 | 0     |

|          |       |      |
|----------|-------|------|
| OR10K1   | 0.942 | 0    |
| OR10K2   | 0.939 | 0    |
| OR10N1P  | 0.923 | 0    |
| OR10P1   | 0.942 | 0    |
| OR10Q1   | 0.96  | 0    |
| OR10Q2P  | 0.943 | 0    |
| OR10R2   | 1.008 | 0    |
| OR10R3P  | 0.939 | 0    |
| OR10S1   | 0.996 | 0.1  |
| OR10T2   | 0.945 | 0    |
| OR10U1P  | 0.956 | 0    |
| OR10V1   | 0.93  | 0    |
| OR10V2P  | 0.764 | 0.26 |
| OR10V3P  | 0.725 | 0    |
| OR10W1   | 1.469 | 0    |
| OR10X1   | 0.981 | 0    |
| OR10Y1P  | 0.974 | 0    |
| OR10Z1   | 0.942 | 0    |
| OR11A1   | 6.687 | 0    |
| OR11G1P  | 0.951 | 0    |
| OR11G2   | 1.038 | 0    |
| OR11H1   | 0.981 | 0    |
| OR11H12  | 0.981 | 0    |
| OR11H13P | 0.93  | 0    |
| OR11H3P  | 0.947 | 0    |
| OR11H4   | 0.975 | 0    |
| OR11H5P  | 0.899 | 0    |
| OR11H6   | 0.993 | 0    |
| OR11H7P  | 0.942 | 0    |
| OR11H8P  | 1.381 | 0    |
| OR11I1P  | 0.944 | 0    |
| OR11J1P  | 0.96  | 0    |
| OR11J2P  | 0.946 | 0    |
| OR11J5P  | 0.96  | 0    |
| OR11K1P  | 0.929 | 0    |
| OR11K2P  | 0.948 | 0    |
| OR11L1   | 0.969 | 0    |
| OR11M1P  | 0.973 | 0    |
| OR11N1P  | 0.98  | 0    |
| OR11P1P  | 0.374 | 0    |
| OR11Q1P  | 0.949 | 0    |
| OR12D1P  | 2.796 | 0    |
| OR12D2   | 1.848 | 0    |
| OR12D3   | 3.738 | 0    |
| OR13A1   | 2.078 | 0.1  |
| OR13C1P  | 0.954 | 0    |
| OR13C2   | 0.957 | 0    |
| OR13C3   | 1.044 | 0    |
| OR13C4   | 0.957 | 0    |
| OR13C5   | 0.957 | 0    |

|         |       |      |
|---------|-------|------|
| OR13C6P | 0.947 | 0    |
| OR13C7P | 0.956 | 0    |
| OR13C8  | 0.963 | 0    |
| OR13C9  | 0.957 | 0    |
| OR13D1  | 1.041 | 0    |
| OR13D2P | 0.934 | 0    |
| OR13D3P | 0.934 | 0    |
| OR13E1P | 0.956 | 0    |
| OR13F1  | 0.96  | 0    |
| OR13G1  | 0.924 | 0    |
| OR13H1  | 0.927 | 0    |
| OR13I1P | 1.265 | 0    |
| OR13J1  | 0.939 | 0    |
| OR13K1P | 1.084 | 0    |
| OR13Z1P | 0.893 | 0    |
| OR13Z2P | 0.556 | 0    |
| OR1A1   | 0.93  | 0    |
| OR1A2   | 0.93  | 0    |
| OR1AA1P | 0.941 | 0    |
| OR1AB1P | 0.739 | 0    |
| OR1B1   | 0.957 | 0    |
| OR1C1   | 1.143 | 0    |
| OR1D2   | 0.939 | 0    |
| OR1D3P  | 0.641 | 0    |
| OR1D4   | 0.939 | 0    |
| OR1E1   | 0.945 | 0    |
| OR1E2   | 0.972 | 0    |
| OR1E3P  | 0.948 | 0    |
| OR1F1   | 0.939 | 0    |
| OR1F12P | 1.414 | 0    |
| OR1F2   | 0.985 | 0    |
| OR1G1   | 0.942 | 0    |
| OR1H1P  | 0.934 | 0    |
| OR1I1   | 1.068 | 0    |
| OR1J1   | 0.969 | 0    |
| OR1J2   | 0.942 | 0    |
| OR1J4   | 0.942 | 0    |
| OR1K1   | 0.951 | 0    |
| OR1L1   | 1.083 | 0    |
| OR1L3   | 0.975 | 0    |
| OR1L4   | 0.936 | 0    |
| OR1L6   | 1.044 | 0    |
| OR1L8   | 0.93  | 0    |
| OR1M1   | 0.942 | 0.11 |
| OR1M4P  | 0.463 | 0    |
| OR1N1   | 0.936 | 0    |
| OR1N2   | 0.993 | 0    |
| OR1P1P  | 0.993 | 0    |
| OR1Q1   | 0.945 | 0    |
| OR1R1P  | 1.029 | 0    |

|         |       |      |
|---------|-------|------|
| OR1S1   | 0.978 | 0    |
| OR1S2   | 0.978 | 0    |
| OR1X1P  | 1.245 | 0    |
| OR1X5P  | 1.252 | 0    |
| OR2A1   | 1.866 | 0.05 |
| OR2A12  | 1.866 | 0    |
| OR2A13P | 2.414 | 0    |
| OR2A14  | 1.863 | 0.16 |
| OR2A15P | 1.794 | 0    |
| OR2A2   | 1.914 | 0.26 |
| OR2A20P | 2.063 | 0    |
| OR2A25  | 1.866 | 0    |
| OR2A3P  | 2.667 | 0    |
| OR2A4   | 0.933 | 0    |
| OR2A41P | 0.924 | 0    |
| OR2A42  | 1.83  | 0.05 |
| OR2A5   | 1.872 | 0    |
| OR2A7   | 1.866 | 0.05 |
| OR2A9P  | 2.118 | 0.51 |
| OR2AD1P | 2.784 | 0    |
| OR2AE1  | 1.944 | 2.7  |
| OR2AF1P | 0.89  | 0    |
| OR2AG1  | 0.951 | 0    |
| OR2AG2  | 0.951 | 0    |
| OR2AH1P | 0.925 | 0    |
| OR2AI1P | 0.929 | 0    |
| OR2AJ1  | 0.943 | 0    |
| OR2AK2  | 1.008 | 0    |
| OR2AL1P | 0.737 | 0    |
| OR2AM1P | 0.405 | 0    |
| OR2AO1P | 1.555 | 0.06 |
| OR2AP1  | 0.927 | 0    |
| OR2AQ1P | 0.241 | 0    |
| OR2AS1P | 0.482 | 0    |
| OR2AS2P | 0.35  | 0    |
| OR2AT1P | 0.77  | 0    |
| OR2AT2P | 0.972 | 0    |
| OR2AT4  | 0.963 | 0    |
| OR2B11  | 0.954 | 0    |
| OR2B2   | 1.074 | 0    |
| OR2B3   | 2.826 | 0    |
| OR2B4P  | 1.91  | 0.98 |
| OR2B6   | 0.942 | 2.63 |
| OR2B7P  | 0.935 | 0    |
| OR2B8P  | 0.938 | 0    |
| OR2BH1P | 0.864 | 0    |
| OR2C1   | 0.939 | 0    |
| OR2C3   | 2.742 | 0    |
| OR2D2   | 0.927 | 0    |
| OR2D3   | 0.993 | 0    |

|         |       |      |
|---------|-------|------|
| OR2E1P  | 0.628 | 0    |
| OR2F1   | 2.178 | 0    |
| OR2F2   | 1.908 | 0    |
| OR2G1P  | 2.973 | 0    |
| OR2G2   | 0.954 | 0    |
| OR2G3   | 0.93  | 0    |
| OR2G6   | 0.951 | 0    |
| OR2H1   | 8.988 | 0    |
| OR2H2   | 3.189 | 0    |
| OR2H4P  | 2.823 | 0    |
| OR2H5P  | 1.734 | 0    |
| OR2I1P  | 3.177 | 0    |
| OR2J1   | 2.808 | 0    |
| OR2J2   | 2.817 | 0    |
| OR2J3   | 2.808 | 0    |
| OR2J4P  | 2.799 | 0    |
| OR2K2   | 0.951 | 0    |
| OR2L13  | 1.884 | 0    |
| OR2L1P  | 0.925 | 0    |
| OR2L2   | 1.134 | 0    |
| OR2L3   | 0.939 | 0    |
| OR2L5   | 0.936 | 0    |
| OR2L6P  | 0.936 | 0    |
| OR2L8   | 0.939 | 0    |
| OR2L9P  | 0.934 | 0    |
| OR2M1P  | 0.645 | 0    |
| OR2M2   | 1.044 | 0    |
| OR2M3   | 0.939 | 0    |
| OR2M4   | 0.936 | 0    |
| OR2M5   | 0.939 | 0    |
| OR2M7   | 0.939 | 0    |
| OR2N1P  | 2.841 | 0    |
| OR2P1P  | 2.205 | 0    |
| OR2Q1P  | 1.856 | 1.81 |
| OR2R1P  | 2.7   | 0    |
| OR2S1P  | 0.947 | 0    |
| OR2S2   | 0.93  | 0    |
| OR2T1   | 1.11  | 0    |
| OR2T10  | 0.939 | 0    |
| OR2T11  | 0.951 | 0    |
| OR2T12  | 0.963 | 0    |
| OR2T2   | 0.975 | 0    |
| OR2T27  | 0.954 | 0    |
| OR2T29  | 0.93  | 0    |
| OR2T3   | 0.957 | 0    |
| OR2T32P | 0.961 | 0    |
| OR2T33  | 0.963 | 0    |
| OR2T34  | 0.957 | 0    |
| OR2T35  | 0.972 | 0    |
| OR2T4   | 1.047 | 0    |

|         |       |      |
|---------|-------|------|
| OR2T5   | 0.948 | 0    |
| OR2T6   | 0.927 | 0    |
| OR2T7   | 0.924 | 0    |
| OR2T8   | 0.939 | 0    |
| OR2U2P  | 1.914 | 0    |
| OR2V1   | 0.945 | 0    |
| OR2V2   | 0.948 | 0    |
| OR2W1   | 2.949 | 0    |
| OR2W2P  | 0.948 | 0    |
| OR2W3   | 0.945 | 0.52 |
| OR2W4P  | 0.923 | 0    |
| OR2W5   | 0.963 | 0    |
| OR2W6P  | 0.998 | 1.39 |
| OR2X1P  | 0.745 | 0    |
| OR2Y1   | 0.936 | 0    |
| OR2Z1   | 0.945 | 0    |
| OR3A1   | 0.948 | 0    |
| OR3A2   | 1.085 | 0    |
| OR3A3   | 0.966 | 0    |
| OR3A4   | 1.047 | 0    |
| OR3B1P  | 0.929 | 0    |
| OR3D1P  | 0.936 | 0    |
| OR4A10P | 0.411 | 0    |
| OR4A11P | 0.918 | 0    |
| OR4A12P | 0.945 | 0    |
| OR4A13P | 0.942 | 0    |
| OR4A14P | 0.959 | 0    |
| OR4A15  | 1.035 | 0    |
| OR4A16  | 0.987 | 0    |
| OR4A17P | 0.904 | 0    |
| OR4A18P | 0.888 | 0    |
| OR4A19P | 0.903 | 0    |
| OR4A1P  | 0.909 | 0    |
| OR4A21P | 0.99  | 0    |
| OR4A2P  | 0.913 | 0    |
| OR4A3P  | 0.871 | 0    |
| OR4A40P | 0.944 | 0    |
| OR4A41P | 0.952 | 0    |
| OR4A42P | 0.934 | 0    |
| OR4A43P | 0.911 | 0    |
| OR4A44P | 0.981 | 0    |
| OR4A45P | 0.916 | 0    |
| OR4A46P | 0.941 | 0    |
| OR4A47  | 0.93  | 0    |
| OR4A48P | 0.774 | 0    |
| OR4A49P | 0.432 | 0    |
| OR4A4P  | 0.927 | 0    |
| OR4A5   | 0.948 | 0    |
| OR4A50P | 0.486 | 0    |
| OR4A6P  | 0.97  | 0    |



|         |       |     |
|---------|-------|-----|
| OR4A7P  | 0.91  | 0   |
| OR4A8P  | 0.945 | 0   |
| OR4A9P  | 0.944 | 0   |
| OR4B1   | 0.93  | 0   |
| OR4B2P  | 0.903 | 0   |
| OR4C10P | 0.946 | 0   |
| OR4C11  | 0.933 | 0   |
| OR4C12  | 0.93  | 0   |
| OR4C13  | 0.93  | 0   |
| OR4C14P | 0.923 | 0   |
| OR4C15  | 1.113 | 0   |
| OR4C16  | 0.933 | 0   |
| OR4C1P  | 0.925 | 0   |
| OR4C2P  | 1.037 | 0   |
| OR4C3   | 0.99  | 0   |
| OR4C46  | 0.93  | 0   |
| OR4C4P  | 7.15  | 0   |
| OR4C5   | 0.792 | 0   |
| OR4C50P | 0.927 | 0   |
| OR4C6   | 0.93  | 0   |
| OR4C7P  | 0.925 | 0   |
| OR4C9P  | 0.925 | 0   |
| OR4D1   | 0.933 | 0   |
| OR4D10  | 0.936 | 0   |
| OR4D11  | 0.936 | 0   |
| OR4D12P | 1.025 | 0   |
| OR4D2   | 1.927 | 0   |
| OR4D5   | 0.957 | 0.2 |
| OR4D6   | 0.945 | 0   |
| OR4D7P  | 1.014 | 0   |
| OR4D8P  | 0.959 | 0   |
| OR4D9   | 0.945 | 0   |
| OR4E1P  | 1.147 | 0   |
| OR4E2   | 0.942 | 0   |
| OR4F13P | 0.937 | 0   |
| OR4F14P | 0.936 | 0   |
| OR4F15  | 0.939 | 0   |
| OR4F16  | 1.738 | 0   |
| OR4F17  | 0.918 | 0   |
| OR4F1P  | 0.935 | 0   |
| OR4F21  | 0.939 | 0   |
| OR4F28P | 0.935 | 0   |
| OR4F29  | 1.738 | 0   |
| OR4F4   | 0.918 | 0   |
| OR4F5   | 0.918 | 0   |
| OR4F6   | 0.939 | 0   |
| OR4F7P  | 0.923 | 0   |
| OR4F8P  | 0.935 | 0   |
| OR4G11P | 0.87  | 0   |
| OR4G1P  | 0.869 | 0   |

|          |       |   |
|----------|-------|---|
| OR4G2P   | 0.576 | 0 |
| OR4G3P   | 0.864 | 0 |
| OR4G4P   | 0.944 | 0 |
| OR4G6P   | 0.944 | 0 |
| OR4H12P  | 0.879 | 0 |
| OR4H6P   | 0.637 | 0 |
| OR4K1    | 0.936 | 0 |
| OR4K11P  | 0.955 | 0 |
| OR4K12P  | 0.933 | 0 |
| OR4K13   | 0.915 | 0 |
| OR4K14   | 0.933 | 0 |
| OR4K15   | 1.047 | 0 |
| OR4K16P  | 1.008 | 0 |
| OR4K17   | 1.032 | 0 |
| OR4K2    | 0.945 | 0 |
| OR4K3P   | 1.347 | 0 |
| OR4K4P   | 0.933 | 0 |
| OR4K5    | 0.972 | 0 |
| OR4K6P   | 0.939 | 0 |
| OR4K7P   | 0.873 | 0 |
| OR4K8P   | 0.972 | 0 |
| OR4L1    | 0.939 | 0 |
| OR4M1    | 0.942 | 0 |
| OR4M2    | 0.942 | 0 |
| OR4N1P   | 0.949 | 0 |
| OR4N2    | 0.924 | 0 |
| OR4N3P   | 0.924 | 0 |
| OR4N4    | 0.951 | 0 |
| OR4N5    | 0.927 | 0 |
| OR4P1P   | 0.936 | 0 |
| OR4P4    | 0.939 | 0 |
| OR4Q1P   | 0.981 | 0 |
| OR4Q2P   | 0.931 | 0 |
| OR4Q3    | 0.942 | 0 |
| OR4R1P   | 0.846 | 0 |
| OR4R2P   | 0.857 | 0 |
| OR4R3P   | 0.838 | 0 |
| OR4S1    | 0.93  | 0 |
| OR4S2    | 0.936 | 0 |
| OR4T1P   | 0.921 | 0 |
| OR4U1P   | 0.94  | 0 |
| OR4V1P   | 0.94  | 0 |
| OR4W1P   | 0.348 | 0 |
| OR4X1    | 0.918 | 0 |
| OR4X2    | 0.912 | 0 |
| OR51A10P | 0.856 | 0 |
| OR51A1P  | 1.066 | 0 |
| OR51A2   | 0.942 | 0 |
| OR51A3P  | 0.957 | 0 |
| OR51A4   | 0.942 | 0 |

|         |       |     |
|---------|-------|-----|
| OR51A5P | 0.966 | 0   |
| OR51A6P | 1.019 | 0   |
| OR51A7  | 0.939 | 0   |
| OR51A8P | 0.937 | 0   |
| OR51A9P | 0.899 | 0   |
| OR51B2  | 0.939 | 0   |
| OR51B3P | 0.949 | 0   |
| OR51B4  | 0.933 | 0   |
| OR51B5  | 0.939 | 0   |
| OR51B6  | 0.939 | 0   |
| OR51B8P | 0.758 | 0   |
| OR51C1P | 0.942 | 0   |
| OR51C4P | 0.948 | 0   |
| OR51D1  | 0.975 | 0   |
| OR51E1  | 1.35  | 0   |
| OR51E2  | 2.781 | 0   |
| OR51F1  | 0.939 | 0   |
| OR51F2  | 1.029 | 0.1 |
| OR51F3P | 0.901 | 0   |
| OR51F4P | 0.899 | 0   |
| OR51F5P | 0.942 | 0   |
| OR51G1  | 0.966 | 0   |
| OR51G2  | 0.945 | 0   |
| OR51H1P | 0.945 | 0   |
| OR51H2P | 0.947 | 0   |
| OR51I1  | 0.945 | 0   |
| OR51I2  | 0.939 | 0   |
| OR51J1  | 0.975 | 0   |
| OR51K1P | 0.947 | 0   |
| OR51L1  | 0.948 | 0   |
| OR51M1  | 0.981 | 0   |
| OR51N1P | 0.949 | 0   |
| OR51P1P | 0.952 | 0   |
| OR51Q1  | 0.954 | 0   |
| OR51R1P | 0.949 | 0   |
| OR51S1  | 0.972 | 0   |
| OR51T1  | 1.065 | 0   |
| OR51V1  | 0.966 | 0   |
| OR52A1  | 0.939 | 0   |
| OR52A4  | 0.915 | 0   |
| OR52A5  | 0.951 | 0   |
| OR52B1P | 0.955 | 0   |
| OR52B2  | 0.972 | 0   |
| OR52B3P | 0.943 | 0   |
| OR52B4  | 0.945 | 0   |
| OR52B5P | 0.945 | 0   |
| OR52B6  | 1.008 | 0   |
| OR52D1  | 0.957 | 0   |
| OR52E1P | 0.923 | 0   |
| OR52E2  | 0.978 | 0   |

|         |       |      |
|---------|-------|------|
| OR52E3P | 0.975 | 0    |
| OR52E4  | 0.939 | 0    |
| OR52E5  | 0.948 | 0    |
| OR52E6  | 0.942 | 0    |
| OR52E7P | 0.929 | 0    |
| OR52E8  | 0.954 | 0    |
| OR52H1  | 0.963 | 0    |
| OR52H2P | 0.932 | 0    |
| OR52I1  | 0.975 | 0    |
| OR52I2  | 1.053 | 0    |
| OR52J1P | 0.87  | 0    |
| OR52J2P | 0.963 | 0    |
| OR52J3  | 0.936 | 0    |
| OR52K1  | 0.945 | 0    |
| OR52K2  | 0.945 | 0    |
| OR52K3P | 0.947 | 0    |
| OR52L1  | 0.99  | 0    |
| OR52L2P | 0.912 | 0    |
| OR52M1  | 0.954 | 0    |
| OR52M2P | 0.98  | 0    |
| OR52N1  | 0.963 | 0    |
| OR52N2  | 0.966 | 0    |
| OR52N3P | 0.958 | 0    |
| OR52N4  | 0.966 | 0    |
| OR52N5  | 0.975 | 0    |
| OR52P1P | 0.96  | 0.11 |
| OR52P2P | 0.897 | 0    |
| OR52Q1P | 0.844 | 0    |
| OR52R1  | 1.185 | 0    |
| OR52S1P | 0.955 | 0    |
| OR52T1P | 0.966 | 0    |
| OR52U1P | 0.977 | 0    |
| OR52V1P | 0.904 | 0    |
| OR52W1  | 0.963 | 0    |
| OR52X1P | 0.98  | 0    |
| OR52Y1P | 0.494 | 0    |
| OR52Z1P | 0.891 | 0    |
| OR55B1P | 0.98  | 0    |
| OR56A1  | 0.957 | 0    |
| OR56A3  | 0.721 | 0    |
| OR56A4  | 1.098 | 0    |
| OR56A7P | 0.938 | 0    |
| OR56B1  | 0.975 | 0    |
| OR56B2P | 0.885 | 0    |
| OR56B3P | 0.944 | 0    |
| OR56B4  | 0.96  | 0    |
| OR5A1   | 0.948 | 0    |
| OR5A2   | 0.975 | 0    |
| OR5AC1P | 0.922 | 0    |
| OR5AC2  | 0.93  | 0    |

|         |       |   |
|---------|-------|---|
| OR5AC4P | 0.916 | 0 |
| OR5AH1P | 0.369 | 0 |
| OR5AK1P | 0.928 | 0 |
| OR5AK2  | 0.93  | 0 |
| OR5AK3P | 0.927 | 0 |
| OR5AK4P | 0.928 | 0 |
| OR5AL1P | 0.985 | 0 |
| OR5AL2P | 0.92  | 0 |
| OR5AM1P | 1.065 | 0 |
| OR5AN1  | 0.936 | 0 |
| OR5AN2P | 0.947 | 0 |
| OR5AO1P | 0.331 | 0 |
| OR5AP1P | 0.94  | 0 |
| OR5AP2  | 0.951 | 0 |
| OR5AQ1P | 0.936 | 0 |
| OR5AR1  | 0.933 | 0 |
| OR5AS1  | 0.975 | 0 |
| OR5AT1  | 0.93  | 0 |
| OR5AU1  | 1.089 | 0 |
| OR5AV1P | 0.879 | 0 |
| OR5AW1P | 0.924 | 0 |
| OR5AX1  | 1.345 | 0 |
| OR5AY1  | 0.949 | 0 |
| OR5AZ1P | 0.929 | 0 |
| OR5B10P | 0.654 | 0 |
| OR5B12  | 0.945 | 0 |
| OR5B15P | 0.916 | 0 |
| OR5B17  | 0.945 | 0 |
| OR5B19P | 0.858 | 0 |
| OR5B1P  | 0.648 | 0 |
| OR5B2   | 0.93  | 0 |
| OR5B21  | 0.93  | 0 |
| OR5B3   | 0.945 | 0 |
| OR5BA1P | 0.979 | 0 |
| OR5BB1P | 0.939 | 0 |
| OR5BC1P | 0.834 | 0 |
| OR5BD1P | 0.827 | 0 |
| OR5BE1P | 0.936 | 0 |
| OR5BF1  | 0.939 | 0 |
| OR5BH1P | 0.909 | 0 |
| OR5BJ1P | 0.904 | 0 |
| OR5BK1P | 0.887 | 0 |
| OR5BL1P | 0.633 | 0 |
| OR5BM1P | 0.926 | 0 |
| OR5BN1P | 0.829 | 0 |
| OR5BN2P | 0.618 | 0 |
| OR5BP1P | 0.434 | 0 |
| OR5BQ1P | 0.336 | 0 |
| OR5BR1P | 1.33  | 0 |
| OR5BS1P | 0.933 | 0 |

|         |       |   |
|---------|-------|---|
| OR5BT1P | 0.955 | 0 |
| OR5BU1  | 0.936 | 0 |
| OR5C1   | 0.963 | 0 |
| OR5D13  | 0.945 | 0 |
| OR5D14  | 0.945 | 0 |
| OR5D15P | 0.942 | 0 |
| OR5D16  | 0.987 | 0 |
| OR5D17P | 0.978 | 0 |
| OR5D18  | 0.942 | 0 |
| OR5D2P  | 0.637 | 0 |
| OR5D3P  | 0.649 | 0 |
| OR5E1P  | 0.933 | 0 |
| OR5F1   | 0.945 | 0 |
| OR5F2P  | 0.941 | 0 |
| OR5G1P  | 0.921 | 0 |
| OR5G3P  | 0.968 | 0 |
| OR5G4P  | 0.981 | 0 |
| OR5G5P  | 0.936 | 0 |
| OR5H1   | 0.942 | 0 |
| OR5H14  | 0.933 | 0 |
| OR5H15  | 0.942 | 0 |
| OR5H2   | 0.945 | 0 |
| OR5H3P  | 0.916 | 0 |
| OR5H4P  | 0.928 | 0 |
| OR5H5P  | 0.925 | 0 |
| OR5H6   | 0.978 | 0 |
| OR5H7P  | 0.927 | 0 |
| OR5H8P  | 0.928 | 0 |
| OR5I1   | 0.945 | 0 |
| OR5J1P  | 0.936 | 0 |
| OR5J2   | 0.939 | 0 |
| OR5J7P  | 0.422 | 0 |
| OR5K1   | 0.952 | 0 |
| OR5K2   | 0.951 | 0 |
| OR5K3   | 0.966 | 0 |
| OR5K4   | 0.966 | 0 |
| OR5L1   | 0.936 | 0 |
| OR5L2   | 0.936 | 0 |
| OR5M1   | 0.948 | 0 |
| OR5M10  | 0.948 | 0 |
| OR5M11  | 0.918 | 0 |
| OR5M12P | 0.968 | 0 |
| OR5M13P | 0.488 | 0 |
| OR5M14P | 0.354 | 0 |
| OR5M2P  | 0.936 | 0 |
| OR5M3   | 0.924 | 0 |
| OR5M4P  | 0.925 | 0 |
| OR5M5P  | 0.936 | 0 |
| OR5M6P  | 0.937 | 0 |
| OR5M7P  | 0.972 | 0 |

|         |       |      |
|---------|-------|------|
| OR5M8   | 0.936 | 0    |
| OR5M9   | 0.933 | 0    |
| OR5P1P  | 0.922 | 0    |
| OR5P2   | 0.969 | 0    |
| OR5P3   | 0.936 | 0    |
| OR5P4P  | 0.92  | 0    |
| OR5R1   | 0.975 | 0    |
| OR5S1P  | 0.948 | 0    |
| OR5T1   | 0.981 | 0    |
| OR5T2   | 1.08  | 0    |
| OR5T3   | 1.023 | 0    |
| OR5U1   | 1.932 | 0    |
| OR5V1   | 2.096 | 0.05 |
| OR5W1P  | 0.803 | 0    |
| OR5W2   | 0.933 | 0    |
| OR6A2   | 1.384 | 0    |
| OR6B1   | 1.872 | 0.16 |
| OR6B2   | 0.939 | 0    |
| OR6B3   | 0.996 | 0    |
| OR6C1   | 0.939 | 0    |
| OR6C2   | 0.939 | 0    |
| OR6C3   | 0.936 | 0    |
| OR6C4   | 0.93  | 0    |
| OR6C5P  | 0.923 | 0    |
| OR6C6   | 0.945 | 0    |
| OR6C64P | 0.879 | 0    |
| OR6C65  | 0.939 | 0    |
| OR6C66P | 0.933 | 0    |
| OR6C68  | 0.954 | 0    |
| OR6C69P | 0.896 | 0    |
| OR6C70  | 0.939 | 0    |
| OR6C71P | 0.936 | 0    |
| OR6C72P | 0.934 | 0    |
| OR6C73P | 0.998 | 0    |
| OR6C74  | 0.939 | 0    |
| OR6C75  | 0.939 | 0    |
| OR6C76  | 0.939 | 0    |
| OR6C7P  | 0.939 | 0    |
| OR6D1P  | 0.813 | 0    |
| OR6E1P  | 0.926 | 0    |
| OR6F1   | 0.927 | 0    |
| OR6J1   | 0.888 | 0    |
| OR6K1P  | 0.971 | 0    |
| OR6K2   | 0.975 | 0    |
| OR6K3   | 0.996 | 0    |
| OR6K4P  | 0.882 | 0    |
| OR6K5P  | 0.848 | 0    |
| OR6K6   | 1.032 | 0    |
| OR6L1P  | 0.88  | 0    |
| OR6L2P  | 0.925 | 0    |

|          |       |       |
|----------|-------|-------|
| OR6M1    | 0.942 | 0     |
| OR6M2P   | 0.946 | 0     |
| OR6M3P   | 0.843 | 0     |
| OR6N1    | 0.939 | 0     |
| OR6N2    | 0.954 | 0     |
| OR6P1    | 0.951 | 0     |
| OR6Q1    | 0.954 | 0     |
| OR6R1P   | 0.929 | 0     |
| OR6R2P   | 0.811 | 0     |
| OR6S1    | 0.996 | 0     |
| OR6T1    | 0.972 | 0     |
| OR6U2P   | 0.932 | 0     |
| OR6V1    | 1.884 | 0     |
| OR6W1P   | 3.004 | 0     |
| OR6X1    | 0.939 | 0     |
| OR6Y1    | 0.978 | 0     |
| OR7A10   | 1.358 | 12.97 |
| OR7A11P  | 0.989 | 0     |
| OR7A15P  | 0.649 | 0     |
| OR7A17   | 0.93  | 0     |
| OR7A18P  | 0.427 | 0     |
| OR7A19P  | 0.733 | 0     |
| OR7A1P   | 0.946 | 0.21  |
| OR7A2P   | 1.677 | 0.12  |
| OR7A3P   | 0.646 | 0     |
| OR7A5    | 2.138 | 97.82 |
| OR7A8P   | 0.633 | 0     |
| OR7C1    | 0.963 | 5.34  |
| OR7C2    | 0.96  | 0     |
| OR7D1P   | 0.649 | 0     |
| OR7D2    | 3.224 | 0.03  |
| OR7D4    | 0.939 | 0     |
| OR7E100P | 1.015 | 0     |
| OR7E101P | 0.674 | 0     |
| OR7E102P | 0.996 | 0     |
| OR7E104P | 0.746 | 0     |
| OR7E105P | 0.996 | 0     |
| OR7E106P | 0.947 | 0     |
| OR7E108P | 1.024 | 0     |
| OR7E109P | 0.947 | 0     |
| OR7E10P  | 0.987 | 0     |
| OR7E110P | 0.596 | 0     |
| OR7E111P | 0.981 | 0     |
| OR7E115P | 0.939 | 0     |
| OR7E116P | 1.026 | 0     |
| OR7E117P | 1.026 | 0     |
| OR7E11P  | 0.663 | 0     |
| OR7E121P | 1.023 | 0     |
| OR7E122P | 0.921 | 0     |
| OR7E125P | 0.969 | 0     |



|          |       |      |
|----------|-------|------|
| OR7E126P | 1.419 | 0    |
| OR7E128P | 1.032 | 0.1  |
| OR7E129P | 1.025 | 0    |
| OR7E12P  | 0.934 | 0    |
| OR7E130P | 0.963 | 0    |
| OR7E136P | 1.934 | 0    |
| OR7E13P  | 0.653 | 0    |
| OR7E140P | 0.996 | 0    |
| OR7E145P | 1.026 | 0    |
| OR7E148P | 0.953 | 0    |
| OR7E149P | 0.981 | 0    |
| OR7E14P  | 0.652 | 0    |
| OR7E155P | 1.026 | 0    |
| OR7E156P | 7.703 | 0.03 |
| OR7E157P | 0.969 | 0    |
| OR7E158P | 0.9   | 0    |
| OR7E159P | 0.309 | 0    |
| OR7E15P  | 0.656 | 0    |
| OR7E160P | 0.1   | 0    |
| OR7E161P | 0.996 | 0    |
| OR7E162P | 1.035 | 0    |
| OR7E16P  | 0.648 | 0    |
| OR7E18P  | 0.821 | 0    |
| OR7E19P  | 0.977 | 0    |
| OR7E1P   | 1.023 | 0    |
| OR7E21P  | 1.054 | 0    |
| OR7E22P  | 1.026 | 0    |
| OR7E23P  | 0.983 | 0    |
| OR7E24   | 1.017 | 0    |
| OR7E25P  | 0.981 | 0    |
| OR7E26P  | 0.654 | 0    |
| OR7E28P  | 0.947 | 0    |
| OR7E29P  | 0.945 | 0    |
| OR7E2P   | 0.807 | 0    |
| OR7E31P  | 0.657 | 0    |
| OR7E33P  | 1.008 | 0    |
| OR7E35P  | 0.914 | 0    |
| OR7E36P  | 0.995 | 0    |
| OR7E37P  | 0.664 | 0    |
| OR7E38P  | 1.973 | 0    |
| OR7E39P  | 1.944 | 0    |
| OR7E41P  | 0.643 | 0    |
| OR7E43P  | 0.652 | 0    |
| OR7E46P  | 0.945 | 0    |
| OR7E47P  | 0.946 | 0.31 |
| OR7E4P   | 0.921 | 0    |
| OR7E53P  | 0.655 | 0    |
| OR7E55P  | 0.951 | 0    |
| OR7E59P  | 1.918 | 0    |
| OR7E5P   | 0.651 | 0    |

|         |       |     |
|---------|-------|-----|
| OR7E62P | 0.646 | 0   |
| OR7E66P | 0.522 | 0   |
| OR7E7P  | 2.014 | 0.1 |
| OR7E83P | 0.965 | 0   |
| OR7E84P | 1.027 | 0   |
| OR7E85P | 1.028 | 0   |
| OR7E86P | 1.023 | 0   |
| OR7E87P | 0.648 | 0   |
| OR7E89P | 0.969 | 0   |
| OR7E8P  | 1.026 | 0   |
| OR7E90P | 0.974 | 0   |
| OR7E91P | 7.092 | 0   |
| OR7E93P | 0.971 | 0   |
| OR7E94P | 0.33  | 0   |
| OR7E96P | 0.969 | 0   |
| OR7E97P | 0.971 | 0   |
| OR7E99P | 1.025 | 0   |
| OR7G1   | 1.002 | 0   |
| OR7G15P | 0.404 | 0   |
| OR7G2   | 1.038 | 0   |
| OR7G3   | 0.939 | 0   |
| OR7H1P  | 0.937 | 0   |
| OR7H2P  | 0.898 | 0   |
| OR7K1P  | 1.004 | 0   |
| OR7L1P  | 1.083 | 0   |
| OR7M1P  | 0.55  | 0   |
| OR8A1   | 0.981 | 0   |
| OR8A2P  | 0.963 | 0   |
| OR8A3P  | 0.379 | 0   |
| OR8B10P | 0.933 | 0   |
| OR8B12  | 0.933 | 0   |
| OR8B1P  | 0.973 | 0   |
| OR8B2   | 0.942 | 0   |
| OR8B3   | 0.942 | 0   |
| OR8B4   | 0.93  | 0   |
| OR8B5P  | 0.803 | 0   |
| OR8B6P  | 0.901 | 0   |
| OR8B7P  | 0.619 | 0   |
| OR8B8   | 0.936 | 0   |
| OR8B9P  | 0.485 | 0   |
| OR8C1P  | 0.675 | 0   |
| OR8D1   | 0.927 | 0   |
| OR8D2   | 0.936 | 0   |
| OR8D4   | 0.945 | 0   |
| OR8F1P  | 0.963 | 0   |
| OR8G1   | 0.865 | 0   |
| OR8G2   | 0.915 | 0   |
| OR8G3P  | 0.465 | 0   |
| OR8G5   | 1.041 | 0   |
| OR8G7P  | 1.197 | 0   |

|        |       |      |
|--------|-------|------|
| OR8H1  | 0.936 | 0    |
| OR8H2  | 0.939 | 0    |
| OR8H3  | 0.939 | 0    |
| OR8I1P | 0.931 | 0    |
| OR8I2  | 0.933 | 0    |
| OR8I4P | 0.141 | 0    |
| OR8J1  | 0.951 | 0    |
| OR8J2P | 0.965 | 0    |
| OR8J3  | 0.948 | 0    |
| OR8K1  | 0.96  | 0    |
| OR8K2P | 0.927 | 0    |
| OR8K3  | 0.939 | 0    |
| OR8K4P | 0.872 | 0    |
| OR8K5  | 0.924 | 0    |
| OR8L1P | 0.955 | 0    |
| OR8Q1P | 0.657 | 0    |
| OR8R1P | 0.554 | 0    |
| OR8S1  | 1.08  | 0    |
| OR8T1P | 0.915 | 0    |
| OR8U8  | 0.96  | 0    |
| OR8V1P | 0.921 | 0    |
| OR8X1P | 0.869 | 0    |
| OR9A1P | 1.578 | 0    |
| OR9A2  | 1.866 | 0    |
| OR9A3P | 1.92  | 0.11 |
| OR9A4  | 1.89  | 0.11 |
| OR9G1  | 0.918 | 0    |
| OR9G2P | 0.988 | 0    |
| OR9G3P | 0.914 | 0    |
| OR9G4  | 0.984 | 0    |
| OR9H1P | 0.924 | 0    |
| OR9I1  | 0.945 | 0    |
| OR9I2P | 0.486 | 0    |
| OR9I3P | 0.942 | 0    |
| OR9K1P | 0.939 | 0    |
| OR9K2  | 1.008 | 0    |
| OR9L1P | 1.257 | 0    |
| OR9M1P | 0.93  | 0    |
| OR9N1P | 1.242 | 0    |
| OR9P1P | 1.412 | 0    |
| OR9Q1  | 2.459 | 0    |
| OR9Q2  | 0.945 | 0    |
| OR9R1P | 0.954 | 0    |
| ORAOV1 | 2.528 | 3.6  |
| ORC1L  | 3.157 | 0.78 |
| ORC2L  | 3.121 | 2.31 |
| ORC3L  | 2.588 | 1.53 |
| ORC4L  | 3.056 | 3.14 |
| ORC5L  | 4.552 | 1.02 |
| ORC6L  | 1.628 | 0.43 |

|          |        |       |
|----------|--------|-------|
| ORM1     | 0.804  | 0     |
| ORM2     | 0.844  | 0.47  |
| ORMDL1   | 2.016  | 13.64 |
| ORMDL2   | 1.244  | 4.93  |
| ORMDL3   | 2.109  | 59.72 |
| OS9      | 2.942  | 41.6  |
| OSAP     | 1.217  | 0     |
| OSBP     | 5.083  | 12.75 |
| OSBP2    | 4.34   | 0.28  |
| OSBPL10  | 3.923  | 1.79  |
| OSBPL11  | 4.196  | 1.32  |
| OSBPL1A  | 5.141  | 2.41  |
| OSBPL2   | 4.08   | 9.85  |
| OSBPL3   | 13.424 | 3.11  |
| OSBPL5   | 3.933  | 4.28  |
| OSBPL6   | 4.008  | 0     |
| OSBPL7   | 4.226  | 4.61  |
| OSBPL8   | 7.48   | 3.45  |
| OSBPL9   | 3.615  | 16.81 |
| OSCAR    | 3.663  | 0.27  |
| OSGEP    | 2.169  | 16.2  |
| OSGEPL1  | 1.388  | 0.28  |
| OSGIN1   | 3.059  | 0.16  |
| OSGIN2   | 4.2    | 3.3   |
| OSM      | 1.865  | 0.53  |
| OSMR     | 4.163  | 2.09  |
| OSR1     | 1.894  | 0     |
| OSR2     | 1.736  | 0.23  |
| OSTalpha | 1.455  | 0.82  |
| OSTbeta  | 0.454  | 0     |
| OSTF1    | 0.901  | 8.89  |
| OSTF1P   | 0.751  | 0.92  |
| OSTM1    | 4.467  | 0.33  |
| OSTN     | 0.402  | 0     |
| OTC      | 1.931  | 0     |
| OTEX     | 0.755  | 0.78  |
| OTOA     | 3.873  | 0.2   |
| OTOF     | 8.939  | 0     |
| OTOG     | 8.775  | 0     |
| OTOP1    | 1.869  | 0     |
| OTOP2    | 1.778  | 0     |
| OTOP3    | 1.791  | 0     |
| OTOR     | 1.477  | 0     |
| OTOS     | 0.566  | 0     |
| OTP      | 2.678  | 0     |
| OTUB1    | 1.871  | 31.3  |
| OTUB2    | 3.873  | 0     |
| OTUD1    | 3.512  | 7.38  |
| OTUD3    | 6.621  | 3.23  |
| OTUD4    | 7.462  | 8.04  |

|        |       |       |
|--------|-------|-------|
| OTUD5  | 3.035 | 31.13 |
| OTUD6A | 1.689 | 0     |
| OTUD6B | 3.142 | 0.57  |
| OTUD7A | 3.042 | 0.04  |
| OTUD7B | 3.152 | 1.19  |
| OTX1   | 2.176 | 0     |
| OTX2   | 2.519 | 0     |
| OVCH1  | 3.42  | 0     |
| OVCH2  | 1.695 | 0     |
| OVGP1  | 2.242 | 0.97  |
| OVOL1  | 2.993 | 0     |
| OVOL2  | 1.555 | 0     |
| OVOS2  | 4.409 | 0.25  |
| OXA1L  | 2.037 | 61.74 |
| OXCT1  | 3.37  | 4.05  |
| OXCT2  | 1.824 | 0     |
| OXCT2P | 1.616 | 0     |
| OXER1  | 1.762 | 2.3   |
| OXGR1  | 2.285 | 0     |
| OXNAD1 | 3.921 | 0.78  |
| OXR1   | 4.393 | 1.76  |
| OXSM   | 1.519 | 3     |
| OXSR1  | 4.523 | 4.51  |
| OXT    | 0.512 | 0.2   |
| OXTR   | 4.361 | 0.38  |
| P11    | 2.321 | 1.49  |
| P117   | 0.9   | 9.78  |
| P15RS  | 4.745 | 2.88  |
| P18SRP | 2.318 | 4.36  |
| P2RX1  | 4.265 | 28.6  |
| P2RX2  | 2.586 | 0.04  |
| P2RX3  | 1.349 | 0     |
| P2RX4  | 2.028 | 7.31  |
| P2RX5  | 2.568 | 6.17  |
| P2RX7  | 3.155 | 0.44  |
| P2RXL1 | 3.554 | 0.03  |
| P2RY1  | 3.11  | 0.22  |
| P2RY10 | 1.79  | 1.44  |
| P2RY11 | 2.828 | 18.79 |
| P2RY12 | 1.704 | 0     |
| P2RY13 | 2.94  | 0.51  |
| P2RY14 | 2.412 | 23.22 |
| P2RY2  | 2.864 | 0.14  |
| P2RY4  | 1.639 | 0     |
| P2RY5  | 2.087 | 32.99 |
| P2RY6  | 3.333 | 0.03  |
| P2RY8  | 4.198 | 42.87 |
| P4HA1  | 2.814 | 25.21 |
| P4HA2  | 2.706 | 0.47  |
| P4HA3  | 2.269 | 0     |

|          |        |        |
|----------|--------|--------|
| P4HB     | 2.422  | 52.82  |
| P5.8     | 1.143  | 0      |
| P5-04    | 0.113  | 13.13  |
| P5-05    | 0.132  | 0      |
| P5-07    | 0.587  | 0      |
| P5-09    | 0.15   | 0      |
| P5-11    | 0.146  | 0      |
| P518     | 0.411  | 0      |
| P53AIP1  | 2.659  | 0      |
| P704P    | 1.236  | 0      |
| PA2G4    | 1.978  | 13.31  |
| PA2G4P   | 1.201  | 0.33   |
| PA2G4P2  | 1.2    | 0.57   |
| PA2G4P4  | 2.757  | 0.75   |
| PA2G4P5  | 1.175  | 0.59   |
| PA2G4P6  | 7.791  | 0.42   |
| PABPC1   | 2.86   | 391.25 |
| PABPC3   | 2.43   | 66.73  |
| PABPC4   | 3.048  | 23.01  |
| PABPC5   | 3.447  | 0      |
| PABPCP1  | 0.942  | 1.89   |
| PABPCP3  | 0.964  | 21.65  |
| PABPN1   | 4.002  | 54.31  |
| PACRG    | 1.619  | 0      |
| PACS1    | 4.488  | 19.45  |
| PACS2    | 4.416  | 12.92  |
| PACSIN1  | 4.234  | 1.12   |
| PACSIN2  | 7.625  | 44.89  |
| PACSIN3  | 1.841  | 17.63  |
| PADI1    | 2.692  | 0      |
| PADI2    | 2.348  | 0.84   |
| PADI3    | 3.186  | 0      |
| PADI4    | 2.263  | 1      |
| PADI6    | 2.397  | 0      |
| PAEP     | 0.84   | 0      |
| PAF1     | 2.425  | 13.99  |
| PAFAH1B1 | 5.58   | 28.42  |
| PAFAH1B2 | 2.611  | 28.99  |
| PAFAH1B3 | 1.003  | 13.51  |
| PAFAH1P1 | 2.248  | 1.37   |
| PAFAH1P2 | 2.369  | 1.21   |
| PAFAH2   | 2.524  | 1.64   |
| PAG1     | 10.744 | 9.75   |
| PAGE1    | 0.665  | 0      |
| PAGE2    | 0.48   | 0.2    |
| PAGE2B   | 0.493  | 0.4    |
| PAGE3    | 0.742  | 0      |
| PAGE4    | 0.493  | 0      |
| PAGE5    | 0.923  | 0      |
| PAH      | 2.681  | 0      |

|             |       |       |
|-------------|-------|-------|
| PAICS       | 3.306 | 4.82  |
| PAIP1       | 3.035 | 4.08  |
| PAIP2       | 1.866 | 83.09 |
| PAK1        | 3.255 | 20.06 |
| PAK1IP1     | 1.497 | 0.6   |
| PAK2        | 5.793 | 9.43  |
| PAK3        | 2.516 | 0     |
| PAK4        | 4.366 | 0.7   |
| PAK6        | 3.859 | 0.44  |
| PAK7        | 4.655 | 0     |
| PALB2       | 4.007 | 1.01  |
| PALLD       | 5.809 | 0.22  |
| PALM        | 2.874 | 33.19 |
| PALM2       | 9.363 | 0.01  |
| PALM2-AKAP2 | 9.219 | 4.55  |
| PALMD       | 2.577 | 0     |
| PAM         | 4     | 2.03  |
| PAMCI       | 1.56  | 0     |
| PAN3        | 5.333 | 35.01 |
| PANK1       | 3.561 | 0     |
| PANK2       | 4     | 7.67  |
| PANK3       | 4.488 | 6.22  |
| PANK4       | 2.642 | 1.5   |
| PANX1       | 2.769 | 1.18  |
| PANX2       | 2.934 | 0.24  |
| PANX3       | 1.6   | 0     |
| PAOX        | 2.934 | 1.35  |
| PAP2D       | 4.135 | 0     |
| PAPD1       | 2.572 | 11.54 |
| PAPD4       | 2.988 | 15    |
| PAPD5       | 7.636 | 1.04  |
| PAPLN       | 5.784 | 0.43  |
| PAPOLA      | 4.803 | 12.3  |
| PAPOLB      | 8.514 | 0.12  |
| PAPOLG      | 4.245 | 3.06  |
| PAPPA       | 10.97 | 0     |
| PAPPA2      | 7.57  | 0     |
| PAPSS1      | 2.542 | 3.42  |
| PAPSS2      | 3.858 | 0.34  |
| PAQR3       | 4.28  | 5.07  |
| PAQR4       | 2.446 | 1.13  |
| PAQR5       | 4.262 | 0     |
| PAQR6       | 3.709 | 11.5  |
| PAQR7       | 3.023 | 3.27  |
| PAQR8       | 4.637 | 0.06  |
| PAQR9       | 2.103 | 0.04  |
| PAR1        | 0.1   | 0     |
| PAR4        | 0.1   | 0     |
| PAR5        | 0.1   | 0     |
| PARC        | 7.771 | 4.88  |

|         |        |       |
|---------|--------|-------|
| PARD3   | 4.071  | 6.44  |
| PARD3B  | 4.066  | 0     |
| PARD6A  | 2.015  | 0.35  |
| PARD6B  | 4.615  | 0.09  |
| PARD6G  | 3.124  | 0.28  |
| PARG    | 2.614  | 0.41  |
| PARK2   | 2.961  | 0     |
| PARK7   | 0.879  | 63.59 |
| PARL    | 1.412  | 18.36 |
| PARN    | 2.992  | 3.57  |
| PARP1   | 3.861  | 33.24 |
| PARP10  | 3.47   | 7.15  |
| PARP11  | 4.486  | 2.56  |
| PARP12  | 7.582  | 2.9   |
| PARP14  | 7.368  | 24.56 |
| PARP15  | 3.751  | 39.56 |
| PARP16  | 2.534  | 1.37  |
| PARP1P1 | 3.53   | 2.81  |
| PARP1P2 | 0.93   | 2.02  |
| PARP2   | 1.861  | 15.37 |
| PARP3   | 3.026  | 3.24  |
| PARP4   | 5.468  | 5.97  |
| PARP4P  | 39.973 | 0.06  |
| PARP6   | 3.159  | 25.46 |
| PARP8   | 3.205  | 13.55 |
| PARP9   | 3.233  | 3.76  |
| PARS2   | 2.347  | 0.12  |
| PAR-SN  | 0.1    | 0     |
| PART1   | 2.097  | 0.04  |
| PARVA   | 4.084  | 0     |
| PARVB   | 1.954  | 9.67  |
| PARVG   | 3.094  | 39.91 |
| PASD1   | 3.161  | 0.12  |
| PASK    | 4.53   | 3.12  |
| PATE    | 1.508  | 0     |
| PATZ1   | 6.396  | 5.62  |
| PAWR    | 1.951  | 0.15  |
| PAX1    | 2.771  | 0     |
| PAX2    | 9.124  | 0     |
| PAX3    | 8.643  | 0     |
| PAX4    | 4.026  | 0     |
| PAX5    | 7.619  | 20.38 |
| PAX6    | 2.966  | 0     |
| PAX7    | 2.389  | 0     |
| PAX8    | 6.777  | 0.02  |
| PAX9    | 1.629  | 0     |
| PAXIP1  | 7.424  | 0.46  |
| PB1     | 7.917  | 4.09  |
| PBEF1   | 4.752  | 4.79  |
| PBK     | 1.854  | 0.53  |



|         |        |        |
|---------|--------|--------|
| PBLD    | 2.917  | 3.05   |
| PBOV1   | 2.505  | 0      |
| PBPP1   | 1.343  | 0.07   |
| PBX1    | 1.813  | 0.05   |
| PBX2    | 9.609  | 0.05   |
| PBX2P1  | 3.202  | 2.04   |
| PBX3    | 3.227  | 8.65   |
| PBX4    | 1.438  | 6.47   |
| PBXIP1  | 4.668  | 62.7   |
| PC      | 4.241  | 0.21   |
| PC-3    | 0.68   | 7.71   |
| PCAF    | 4.824  | 2.48   |
| PCBD1   | 1.006  | 0.89   |
| PCBD2   | 2.439  | 282.94 |
| PCBP1   | 1.634  | 116.92 |
| PCBP2   | 3.601  | 166.2  |
| PCBP2P1 | 1.125  | 12.84  |
| PCBP3   | 1.988  | 0.05   |
| PCBP4   | 3.366  | 1.71   |
| PCCA    | 2.494  | 1.03   |
| PCCB    | 1.827  | 8.07   |
| PCDH1   | 7.542  | 0.05   |
| PCDH10  | 8.475  | 0      |
| PCDH11X | 14.084 | 0      |
| PCDH11Y | 11.256 | 0      |
| PCDH12  | 5.182  | 1.8    |
| PCDH15  | 7.021  | 0      |
| PCDH17  | 6.031  | 0.05   |
| PCDH18  | 5.143  | 0.02   |
| PCDH19  | 6.495  | 0      |
| PCDH20  | 4.404  | 0      |
| PCDH21  | 5.325  | 0.04   |
| PCDH7   | 12.444 | 0      |
| PCDH8   | 6.342  | 0.04   |
| PCDH9   | 6.222  | 1.81   |
| PCDHA@  | 0.1    | 0      |
| PCDHA1  | 9.433  | 0      |
| PCDHA10 | 9.388  | 0      |
| PCDHA11 | 8.548  | 0      |
| PCDHA12 | 7.739  | 0      |
| PCDHA13 | 7.687  | 0      |
| PCDHA14 | 2.363  | 0      |
| PCDHA2  | 8.435  | 0      |
| PCDHA3  | 7.735  | 0.01   |
| PCDHA4  | 7.749  | 0      |
| PCDHA5  | 7.669  | 0      |
| PCDHA6  | 9.301  | 0      |
| PCDHA7  | 7.591  | 0      |
| PCDHA8  | 7.705  | 0      |
| PCDHA9  | 11.648 | 0      |

|          |       |       |
|----------|-------|-------|
| PCDHAC1  | 8.383 | 0     |
| PCDHAC2  | 8.086 | 0     |
| PCDHACT  | 2.866 | 0     |
| PCDHB1   | 2.534 | 0     |
| PCDHB10  | 3.262 | 0     |
| PCDHB11  | 3.271 | 0.09  |
| PCDHB12  | 3.408 | 0     |
| PCDHB13  | 3.485 | 0     |
| PCDHB14  | 2.783 | 0.11  |
| PCDHB15  | 2.656 | 0.07  |
| PCDHB16  | 4.817 | 0     |
| PCDHB17  | 2.411 | 0     |
| PCDHB18  | 3.166 | 0.06  |
| PCDHB19P | 4.632 | 0     |
| PCDHB2   | 2.728 | 0     |
| PCDHB3   | 3.173 | 0     |
| PCDHB4   | 3.621 | 0     |
| PCDHB5   | 2.905 | 0     |
| PCDHB6   | 3.03  | 0     |
| PCDHB7   | 3.715 | 0     |
| PCDHB8   | 2.592 | 0     |
| PCDHB9   | 4.219 | 0     |
| PCDHGA1  | 7.074 | 0.2   |
| PCDHGA10 | 7.17  | 0.33  |
| PCDHGA11 | 9.609 | 0.49  |
| PCDHGA12 | 7.237 | 0.6   |
| PCDHGA2  | 7.262 | 0.19  |
| PCDHGA3  | 7.095 | 0.2   |
| PCDHGA4  | 7.131 | 0.2   |
| PCDHGA5  | 7.044 | 0.25  |
| PCDHGA6  | 7.062 | 0.71  |
| PCDHGA7  | 7.326 | 0.36  |
| PCDHGA8  | 8.093 | 0.23  |
| PCDHGA9  | 7.092 | 0.3   |
| PCDHGB1  | 7.023 | 0.24  |
| PCDHGB2  | 7.038 | 0.92  |
| PCDHGB3  | 7.041 | 0.49  |
| PCDHGB4  | 6.99  | 0.41  |
| PCDHGB5  | 7.035 | 0.32  |
| PCDHGB6  | 7.062 | 0.25  |
| PCDHGB7  | 7.311 | 0.39  |
| PCDHGB8P | 1.973 | 0.1   |
| PCDHGB9P | 2.304 | 0.09  |
| PCDHGC3  | 7.435 | 2.29  |
| PCDHGC4  | 7.239 | 0.31  |
| PCDHGC5  | 7.278 | 0.34  |
| PCF11    | 6.965 | 17.24 |
| PCFT     | 2.097 | 0.04  |
| PCGEM1   | 1.59  | 0     |
| PCGF1    | 0.871 | 11.7  |

|         |        |       |
|---------|--------|-------|
| PCGF2   | 2.604  | 3.49  |
| PCGF3   | 6.876  | 15.22 |
| PCGF5   | 7.474  | 2.87  |
| PCGF6   | 2.23   | 0.93  |
| PCGF7P  | 1.916  | 0.36  |
| PCID1   | 1.587  | 61.84 |
| PCID2   | 1.786  | 3.77  |
| PCK1    | 2.688  | 0     |
| PCK2    | 2.789  | 3.87  |
| PCLKC   | 4.095  | 0.24  |
| PCLO    | 30.099 | 0.12  |
| PCM1    | 6.939  | 10.83 |
| PCMT1   | 1.599  | 6.25  |
| PCMTD1  | 6.62   | 13.33 |
| PCMTD2  | 4.021  | 20.12 |
| PCNA    | 1.558  | 16.19 |
| PCNAP   | 0.983  | 0     |
| PCNAP1  | 1.748  | 0     |
| PCNP    | 2.372  | 30.62 |
| PCNT    | 10.541 | 3.23  |
| PCNX    | 7.69   | 5.3   |
| PCNXL2  | 6.089  | 2.24  |
| PCNXL3  | 7.207  | 5.84  |
| PCOLCE  | 3.016  | 0.89  |
| PCOLCE2 | 1.91   | 0     |
| PCOLN3  | 2.477  | 15.98 |
| PCOTH   | 0.804  | 0.37  |
| PCP2    | 1.223  | 16.5  |
| PCP4    | 0.556  | 0     |
| PCP4L1  | 1.43   | 0     |
| PCQAP   | 8.831  | 27.85 |
| PCQAPP  | 4.365  | 0     |
| PCSK1   | 5.054  | 0     |
| PCSK1N  | 0.973  | 0.1   |
| PCSK2   | 4.745  | 0     |
| PCSK4   | 2.661  | 0.12  |
| PCSK5   | 3.295  | 0.06  |
| PCSK6   | 8.008  | 0.18  |
| PCSK7   | 3.484  | 24.65 |
| PCSK9   | 3.636  | 0.03  |
| PCTK1   | 3.704  | 26.9  |
| PCTK2   | 4.29   | 4.34  |
| PCTK3   | 3.569  | 2.63  |
| PCTP    | 1.933  | 11.62 |
| PCYOX1  | 4.225  | 0.63  |
| PCYOX1L | 2.506  | 3.59  |
| PCYT1A  | 1.583  | 7.87  |
| PCYT1B  | 5.447  | 0     |
| PCYT2   | 1.85   | 1.92  |
| PDAP1   | 5.011  | 7.17  |

|          |        |       |
|----------|--------|-------|
| PDC      | 1.46   | 0.07  |
| PDCD1    | 2.107  | 2.53  |
| PDCD10   | 1.607  | 6.22  |
| PDCD11   | 6.416  | 2.48  |
| PDCD1LG2 | 1.509  | 0     |
| PDCD2    | 2.753  | 7.84  |
| PDCD2L   | 1.158  | 0.94  |
| PDCD4    | 4.545  | 24.1  |
| PDCD5    | 0.567  | 8.38  |
| PDCD6    | 1.132  | 12.15 |
| PDCD6IP  | 6.448  | 7.16  |
| PDCD7    | 2.851  | 3.44  |
| PDCL     | 2.743  | 4.04  |
| PDCL2    | 0.861  | 0     |
| PDCL3    | 1.066  | 3.99  |
| PDDC1    | 4.363  | 2.7   |
| PDE10A   | 4.566  | 0     |
| PDE11A   | 4.444  | 0     |
| PDE1A    | 2.855  | 0.73  |
| PDE1B    | 3.704  | 5.88  |
| PDE1C    | 5.388  | 0     |
| PDE2A    | 4.23   | 11.58 |
| PDE3A    | 4.124  | 0     |
| PDE3B    | 4.774  | 3.81  |
| PDE4A    | 4.256  | 1.42  |
| PDE4B    | 5.326  | 36.02 |
| PDE4C    | 3.381  | 0     |
| PDE4D    | 5.876  | 2.28  |
| PDE4DIP  | 12.771 | 0.49  |
| PDE5A    | 7.769  | 0.15  |
| PDE6A    | 2.944  | 0     |
| PDE6B    | 3.232  | 0.21  |
| PDE6C    | 2.968  | 0.04  |
| PDE6D    | 1.118  | 2.21  |
| PDE6G    | 1.221  | 1.7   |
| PDE6H    | 0.725  | 0     |
| PDE7A    | 4.247  | 4.54  |
| PDE7B    | 5.387  | 0     |
| PDE8A    | 5.021  | 7.8   |
| PDE8B    | 3.567  | 1.08  |
| PDE9A    | 2.636  | 7.39  |
| PDF      | 1.158  | 3.5   |
| PDGFA    | 4.714  | 0.23  |
| PDGFB    | 3.462  | 0.03  |
| PDGFC    | 3.007  | 0.04  |
| PDGFD    | 4.18   | 0.1   |
| PDGFRA   | 6.391  | 0     |
| PDGFRB   | 5.714  | 2.79  |
| PDGFRL   | 1.502  | 0     |
| PDHA1    | 4.122  | 37.87 |

|          |        |        |
|----------|--------|--------|
| PDHA2    | 1.383  | 1.57   |
| PDHB     | 1.501  | 11.34  |
| PDHX     | 2.344  | 1.64   |
| PDIA2    | 1.658  | 0.18   |
| PDIA3    | 3.054  | 34.73  |
| PDIA3P   | 2.099  | 23.71  |
| PDIA4    | 6.283  | 3.91   |
| PDIA5    | 1.679  | 4.24   |
| PDIA6    | 2.552  | 32.14  |
| PDIK1L   | 4.288  | 1.73   |
| PDILT    | 2.127  | 0      |
| PDK1     | 4.576  | 3.87   |
| PDK2     | 2.29   | 2.51   |
| PDK3     | 1.593  | 1.8    |
| PDK4     | 7.399  | 18.79  |
| PDLIM1   | 1.452  | 109.77 |
| PDLIM1P  | 1.072  | 7.39   |
| PDLIM2   | 6.143  | 1.93   |
| PDLIM3   | 1.706  | 0      |
| PDLIM4   | 2.259  | 0.04   |
| PDLIM5   | 7.474  | 0      |
| PDLIM7   | 2.074  | 2.1    |
| PDP2     | 3.83   | 0.26   |
| PDPK1    | 7.236  | 7.6    |
| PDPK2    | 27.176 | 0.82   |
| PDPN     | 3.22   | 0      |
| PDPR     | 8.46   | 4.64   |
| PDRG1    | 1.373  | 22.84  |
| PDSS1    | 1.619  | 1.78   |
| PDSS2    | 3.526  | 0.53   |
| PDX1     | 1.523  | 0      |
| PDXK     | 8.759  | 28.25  |
| PDXP     | 2.005  | 0.84   |
| PDYN     | 2.557  | 0      |
| PDZD11   | 1.663  | 3.51   |
| PDZD2    | 11.751 | 1.57   |
| PDZD3    | 2.204  | 0      |
| PDZD4    | 3.745  | 0.35   |
| PDZD7    | 2.021  | 0.29   |
| PDZD8    | 3.837  | 3.53   |
| PDZK1    | 2.107  | 0      |
| PDZK1IP1 | 0.894  | 0.67   |
| PDZRN3   | 4.161  | 0.07   |
| PDZRN4   | 3.21   | 0      |
| PEA15    | 2.469  | 4.28   |
| PEAR1    | 5.435  | 38.63  |
| PEBP1    | 2.306  | 72.34  |
| PEBP4    | 0.883  | 0      |
| PECAM1   | 3.472  | 34.33  |
| PECI     | 1.617  | 2.44   |

|         |        |        |
|---------|--------|--------|
| PECR    | 1.846  | 0      |
| PEF1    | 1.61   | 29.62  |
| PEG10   | 13.232 | 11.87  |
| PEG3    | 6.371  | 0      |
| PELI1   | 9.362  | 46     |
| PELI2   | 5.696  | 2.59   |
| PELI3   | 2.68   | 0.04   |
| PELO    | 2.92   | 0.75   |
| PELP1   | 3.393  | 9.13   |
| PEMT    | 1.318  | 6.16   |
| PENK    | 1.196  | 0      |
| PEO1    | 3.602  | 1.38   |
| PEPD    | 1.889  | 8.85   |
| PEPP-2  | 1.297  | 0      |
| PER1    | 8.699  | 160.74 |
| PER2    | 6.235  | 2.11   |
| PER3    | 6.203  | 0      |
| PER4    | 3.096  | 0      |
| PERF15  | 0.399  | 0      |
| PERLD1  | 2.687  | 10.57  |
| PERP    | 1.945  | 0      |
| PERQ1   | 13.386 | 27.38  |
| PES1    | 2.262  | 13.6   |
| PET112L | 2.011  | 1.67   |
| PEX1    | 8.764  | 1.76   |
| PEX10   | 2.25   | 5.32   |
| PEX11A  | 1.163  | 0      |
| PEX11B  | 1.61   | 14.99  |
| PEX11G  | 1.062  | 0.09   |
| PEX12   | 2.6    | 0.53   |
| PEX13   | 1.724  | 2.76   |
| PEX14   | 1.908  | 4.15   |
| PEX16   | 1.844  | 12.07  |
| PEX19   | 3.656  | 3.73   |
| PEX26   | 3.075  | 7.05   |
| PEX3    | 1.967  | 0.51   |
| PEX5    | 3.169  | 3.12   |
| PEX5L   | 3.577  | 0      |
| PEX6    | 3.27   | 6.81   |
| PEX7    | 1.448  | 0.54   |
| PF4     | 0.438  | 0      |
| PF4V1   | 0.741  | 0      |
| PFAAP5  | 3.168  | 13.74  |
| PFAS    | 5.338  | 3.54   |
| PFDN1   | 1.324  | 21.67  |
| PFDN2   | 0.642  | 21.88  |
| PFDN4   | 1.346  | 2.64   |
| PFDN5   | 0.975  | 207.01 |
| PFDN6   | 1.782  | 0      |
| PFKFB1  | 1.732  | 0      |

|         |        |        |
|---------|--------|--------|
| PFKFB2  | 9.143  | 6.61   |
| PFKFB3  | 4.482  | 13.38  |
| PFKFB4  | 3.49   | 0.74   |
| PFKL    | 9.457  | 50.71  |
| PFKM    | 2.747  | 4.32   |
| PFKP    | 2.616  | 12.11  |
| PFN1    | 0.915  | 225.98 |
| PFN2    | 3.467  | 0.09   |
| PFN3    | 0.414  | 0      |
| PFN4    | 0.778  | 0.12   |
| PFTK1   | 9.908  | 2.11   |
| pFUSIP1 | 0.522  | 0.38   |
| PGA3    | 1.937  | 0      |
| PGA4    | 2.07   | 0      |
| PGA5    | 1.36   | 0      |
| PGAM1   | 1.72   | 2.76   |
| PGAM2   | 2.282  | 6.24   |
| PGAM3P  | 0.427  | 0      |
| PGAM4   | 1.678  | 0.18   |
| PGAM5   | 1.151  | 2.92   |
| PGAP1   | 11.113 | 1.08   |
| PGBD1   | 3.065  | 2.49   |
| PGBD2   | 3.858  | 0.08   |
| PGBD3   | 2.172  | 0.37   |
| PGBD3P1 | 1.797  | 0      |
| PGBD3P2 | 0.614  | 0.16   |
| PGBD3P3 | 1.158  | 0      |
| PGBD3P4 | 1.844  | 0      |
| PGBD4   | 3.907  | 0.59   |
| PGBD5   | 3.444  | 0      |
| PGC     | 1.354  | 0      |
| PGCP    | 1.898  | 6.2    |
| PGD     | 1.937  | 23.09  |
| PGDS    | 1.615  | 0      |
| PGF     | 1.731  | 0.45   |
| PGGT1B  | 1.658  | 1.67   |
| PGK1    | 2.32   | 37.01  |
| PGK1P1  | 1.77   | 4.86   |
| PGK1P2  | 1.527  | 3.44   |
| PGK2    | 1.644  | 0.06   |
| PGLS    | 1.034  | 34.06  |
| PGLYRP1 | 0.69   | 3.3    |
| PGLYRP2 | 2.751  | 0      |
| PGLYRP3 | 1.173  | 0      |
| PGLYRP4 | 1.834  | 0      |
| PGM1    | 2.472  | 1.6    |
| PGM2    | 3.177  | 4.2    |
| PGM2L1  | 8.501  | 1.1    |
| PGM3    | 1.994  | 1      |
| PGM5    | 3.338  | 1.13   |

|         |        |        |
|---------|--------|--------|
| PGM5P1  | 87.489 | 0.07   |
| PGM5P2  | 69.591 | 0.08   |
| PGPEP1  | 7.084  | 0.37   |
| PGR     | 5      | 0      |
| PGRMC1  | 1.864  | 4.41   |
| PGRMC2  | 1.853  | 5.08   |
| PGS1    | 4.863  | 17.36  |
| PH-4    | 4.03   | 4.29   |
| PHACS   | 2.682  | 17.23  |
| PHACTR1 | 8.237  | 21.05  |
| PHACTR2 | 4.318  | 0.07   |
| PHACTR3 | 3.119  | 0      |
| PHACTR4 | 4.233  | 9.23   |
| PHB     | 1.826  | 29.64  |
| PHB2    | 1.416  | 104.32 |
| PHBP1   | 1.024  | 0      |
| PHC1    | 5.179  | 4.6    |
| PHC2    | 4.375  | 30.69  |
| PHC3    | 3.964  | 14.15  |
| PHCA    | 3.452  | 0.72   |
| PHEX    | 2.861  | 0.2    |
| PHF1    | 3.106  | 16.92  |
| PHF10   | 4.376  | 29.66  |
| PHF10P1 | 1.668  | 4.56   |
| PHF11   | 2.827  | 21.73  |
| PHF12   | 5.912  | 20.58  |
| PHF13   | 3.644  | 0.84   |
| PHF14   | 9.16   | 1      |
| PHF15   | 6.463  | 7.41   |
| PHF16   | 5.141  | 6.29   |
| PHF17   | 5.107  | 7.29   |
| PHF19   | 4.658  | 3.76   |
| PHF2    | 5.397  | 10.23  |
| PHF20   | 5.515  | 6.44   |
| PHF20L1 | 8.056  | 3.38   |
| PHF21A  | 3.863  | 11.22  |
| PHF21B  | 3.671  | 0      |
| PHF23   | 1.971  | 4.32   |
| PHF3    | 6.947  | 27.59  |
| PHF5A   | 1.065  | 19.05  |
| PHF5CP  | 1.274  | 0.31   |
| PHF5DP  | 0.94   | 1.26   |
| PHF5EP  | 0.93   | 0.85   |
| PHF5FP  | 3.283  | 0.03   |
| PHF5GP  | 0.892  | 0.33   |
| PHF5HP  | 1.323  | 0.07   |
| PHF6    | 8.341  | 1.13   |
| PHF7    | 2.276  | 3.22   |
| PHF8    | 5.762  | 7.47   |
| PHGDH   | 1.913  | 0.68   |



|          |       |       |
|----------|-------|-------|
| PHGDHL1  | 2.525 | 7.32  |
| PHIP     | 6.655 | 9.19  |
| PHKA1    | 4.205 | 0.07  |
| PHKA2    | 4.565 | 5.68  |
| PHKB     | 5.153 | 9.83  |
| PHKBP1   | 0.7   | 0     |
| PHKBP2   | 0.527 | 0     |
| PHKG1    | 2.862 | 0.49  |
| PHKG1P1  | 3.868 | 0     |
| PHKG1P2  | 3.314 | 0     |
| PHKG2    | 1.578 | 5.08  |
| PHKGL    | 2.006 | 0.1   |
| PHLDA1   | 5.913 | 0.25  |
| PHLDA2   | 0.92  | 0.11  |
| PHLDA3   | 1.516 | 0.13  |
| PHLDB1   | 5.695 | 0.62  |
| PHLDB2   | 5.474 | 0.09  |
| PHLDB3   | 2.286 | 0.09  |
| PHLPP    | 4.798 | 10.93 |
| PHLPPL   | 7.919 | 1.84  |
| PHOSPHO1 | 2.046 | 1.35  |
| PHOSPHO2 | 1.125 | 0.09  |
| PHOX2A   | 1.683 | 0.06  |
| PHOX2B   | 3.029 | 0     |
| PHPT1    | 0.906 | 8.51  |
| PHTF1    | 2.81  | 10.52 |
| PHTF2    | 9.556 | 3.32  |
| PHYH     | 2.106 | 0.47  |
| PHYHD1   | 1.599 | 0.19  |
| PHYHIP   | 2.948 | 0     |
| PHYHIPL  | 3.103 | 0     |
| PI15     | 6.732 | 0     |
| PI16     | 2.19  | 2.17  |
| PI3      | 0.596 | 0     |
| PI4K2B   | 3.674 | 4.84  |
| PI4KII   | 4.185 | 2.68  |
| PIAS1    | 2.999 | 18.41 |
| PIAS2    | 3.191 | 9.02  |
| PIAS3    | 2.858 | 7.89  |
| PIAS4    | 1.737 | 1.99  |
| PIB5PA   | 2.558 | 2.52  |
| PICALM   | 4.153 | 32.31 |
| PICK1    | 8.247 | 43.4  |
| PID1     | 2.745 | 0     |
| PIF1     | 2.658 | 0.37  |
| PIGA     | 6.093 | 1.34  |
| PIGAP1   | 3.367 | 0.23  |
| PIGB     | 2.134 | 2.87  |
| PIGC     | 1.708 | 8.81  |
| PIGCP1   | 0.417 | 5.22  |

|         |        |       |
|---------|--------|-------|
| PIGF    | 1.398  | 1.14  |
| PIGFP1  | 0.911  | 0.22  |
| PIGG    | 4.073  | 7.39  |
| PIGH    | 1.393  | 4.69  |
| PIGK    | 1.887  | 0.94  |
| PIGL    | 1.123  | 5.72  |
| PIGM    | 2.066  | 1.39  |
| PIGN    | 5.208  | 1.29  |
| PIGO    | 4.366  | 1.56  |
| PIGP    | 1.174  | 1.77  |
| PIGQ    | 4.148  | 6.44  |
| PIGR    | 4.266  | 0.14  |
| PIGS    | 2.515  | 18.1  |
| PIGT    | 2.228  | 19.09 |
| PIGU    | 1.832  | 1.72  |
| PIGV    | 2.365  | 3.14  |
| PIGW    | 2.255  | 0.35  |
| PIGX    | 1.862  | 0.8   |
| PIGY    | 1.304  | 26.33 |
| PIGZ    | 2.701  | 1.14  |
| PIH1D1  | 1.192  | 25.65 |
| PIH1D2  | 1.049  | 0.1   |
| PIK3AP1 | 4.811  | 3.76  |
| PIK3C2A | 5.061  | 3.81  |
| PIK3C2B | 7.603  | 5.39  |
| PIK3C2G | 4.846  | 0     |
| PIK3C3  | 3.069  | 3.58  |
| PIK3CA  | 4.411  | 29.41 |
| PIK3CB  | 3.213  | 1.14  |
| PIK3CD  | 5.203  | 30    |
| PIK3CG  | 10.758 | 4.42  |
| PIK3R1  | 7.157  | 26.64 |
| PIK3R2  | 3.938  | 0.58  |
| PIK3R3  | 5.609  | 0.36  |
| PIK3R4  | 4.987  | 5.06  |
| PIK3R5  | 4.122  | 14.33 |
| PIK4CA  | 6.75   | 7.29  |
| PIK4CB  | 3.657  | 13.94 |
| PILRA   | 3.326  | 0.98  |
| PILRB   | 11.575 | 7.72  |
| PIM1    | 2.645  | 9.62  |
| PIM2    | 2.229  | 30.98 |
| PIM3    | 2.852  | 58.49 |
| PIN1    | 0.997  | 21.14 |
| PIN1L   | 1.204  | 0.74  |
| PIN4    | 1.071  | 2.31  |
| PINK1   | 2.66   | 5.55  |
| PINX1   | 1.545  | 2.12  |
| PIP     | 1.152  | 0     |
| PIP3-E  | 6.687  | 0.44  |

|         |        |       |
|---------|--------|-------|
| PIP5K1A | 3.715  | 9.24  |
| PIP5K1B | 4.089  | 1.48  |
| PIP5K1C | 5.047  | 3.32  |
| PIP5K2A | 1.758  | 2.08  |
| PIP5K2B | 4.768  | 8.1   |
| PIP5K2C | 2.924  | 0.37  |
| PIP5K3  | 10.547 | 7.39  |
| PIP5KL1 | 1.104  | 0     |
| PIPOX   | 2.412  | 0.04  |
| PIR     | 1.468  | 0     |
| PISD    | 2.679  | 13.48 |
| PITPNA  | 3.616  | 10.56 |
| PITPNB  | 2.925  | 8.02  |
| PITPNC1 | 3.068  | 7.29  |
| PITPNM1 | 4.189  | 2.2   |
| PITPNM2 | 6.736  | 13.3  |
| PITPNM3 | 3.111  | 0.04  |
| PITRM1  | 3.623  | 8.66  |
| PITX1   | 2.362  | 4.48  |
| PITX2   | 3.081  | 0     |
| PITX3   | 1.388  | 0.07  |
| PIWIL1  | 3.406  | 0     |
| PIWIL2  | 3.611  | 0.05  |
| PIWIL3  | 3.504  | 0     |
| PIWIL4  | 3.138  | 0.35  |
| PJA1    | 6.445  | 0.36  |
| PJA2    | 4.754  | 19.54 |
| PJCG6   | 0.954  | 0     |
| PKD1    | 14.188 | 3.13  |
| PKD1L1  | 18.002 | 0.03  |
| PKD1L2  | 8.114  | 0     |
| PKD1L3  | 5.742  | 0.07  |
| PKD1P1  | 24.064 | 0.27  |
| PKD1P2  | 21.284 | 0.1   |
| PKD1P3  | 24.232 | 0.58  |
| PKD1P4  | 18.077 | 0.11  |
| PKD1P5  | 27.494 | 0.22  |
| PKD1P6  | 29.386 | 0.9   |
| PKD2    | 5.056  | 9.59  |
| PKD2L1  | 3.051  | 0     |
| PKD2L2  | 2.185  | 0.18  |
| PKDREJ  | 7.66   | 0     |
| PKHD1   | 17.407 | 0.01  |
| PKHD1L1 | 13.083 | 0     |
| PKIA    | 2.184  | 0     |
| PKIB    | 2.18   | 0     |
| PKIG    | 1.433  | 4.07  |
| PKLR    | 2.558  | 0     |
| PKM2    | 3.585  | 55    |
| PKMYT1  | 2.495  | 2.5   |

|          |        |       |
|----------|--------|-------|
| PKN1     | 3.136  | 28.36 |
| PKN2     | 4.198  | 16    |
| PKN3     | 3.377  | 5.92  |
| PKNOX1   | 6.673  | 1.26  |
| PKNOX2   | 3.177  | 0     |
| PKP1     | 5.443  | 0     |
| PKP2     | 4.379  | 0.07  |
| PKP2P1   | 4.585  | 0.2   |
| PKP3     | 2.809  | 0     |
| PKP4     | 4.591  | 1.55  |
| PLA1A    | 1.731  | 0.05  |
| PLA2G10  | 0.997  | 0.29  |
| PLA2G12A | 1.659  | 0.47  |
| PLA2G12B | 1.092  | 0     |
| PLA2G1B  | 0.565  | 0.52  |
| PLA2G2A  | 0.97   | 0     |
| PLA2G2D  | 2.63   | 0     |
| PLA2G2E  | 0.487  | 0     |
| PLA2G2F  | 2.716  | 0     |
| PLA2G3   | 2.575  | 0     |
| PLA2G4A  | 2.855  | 0     |
| PLA2G4B  | 3.356  | 5.31  |
| PLA2G4C  | 2.424  | 0.16  |
| PLA2G4D  | 3.584  | 0     |
| PLA2G4E  | 2.52   | 0     |
| PLA2G4F  | 3.399  | 0     |
| PLA2G5   | 1.016  | 0     |
| PLA2G6   | 3.223  | 10.5  |
| PLA2G7   | 1.565  | 0     |
| PLA2R1   | 5.979  | 0     |
| PLAA     | 3.841  | 3.71  |
| PLAC1    | 1.126  | 0     |
| PLAC1L   | 1.633  | 0     |
| PLAC2    | 2.467  | 0     |
| PLAC4    | 3.029  | 0     |
| PLAC8    | 0.739  | 61.72 |
| PLAC8L1  | 0.725  | 0.28  |
| PLAC9    | 0.675  | 0     |
| PLAG1    | 7.302  | 0.36  |
| PLAGL1   | 6.085  | 0.52  |
| PLAGL2   | 5.641  | 23.3  |
| PLAT     | 4.718  | 0     |
| PLAU     | 2.346  | 1.56  |
| PLAUR    | 2.001  | 0.74  |
| PLB1     | 5.063  | 0.23  |
| PLCB1    | 10.102 | 1     |
| PLCB2    | 4.52   | 12.61 |
| PLCB3    | 3.705  | 1.52  |
| PLCB4    | 7.424  | 0     |
| PLCD1    | 2.669  | 3.74  |

|           |        |       |
|-----------|--------|-------|
| PLCD3     | 3.424  | 0.72  |
| PLCD4     | 3.088  | 0.54  |
| PLCE1     | 7.593  | 0     |
| PLCG1     | 6.8    | 32.14 |
| PLCG2     | 4.546  | 8.82  |
| PLCH1     | 6.065  | 0.05  |
| PLCH2     | 4.837  | 0.12  |
| PLCL1     | 4.559  | 0.04  |
| PLCL2     | 3.94   | 5.72  |
| PLCXD1    | 2.085  | 6.88  |
| PLCXD2    | 2.063  | 0.1   |
| PLCXD3    | 7.541  | 0     |
| PLCZ1     | 2.075  | 0     |
| PLD1      | 5.479  | 0     |
| PLD2      | 3.457  | 2.49  |
| PLD3      | 2.408  | 12.58 |
| PLD4      | 1.934  | 3.48  |
| PLD5      | 2.729  | 0.04  |
| PLDN      | 3.941  | 10.17 |
| PLEC1     | 16.296 | 8.52  |
| PLEK      | 2.747  | 5.83  |
| PLEK2     | 1.46   | 0     |
| PLEKHA1   | 3.796  | 1.7   |
| PLEKHA2   | 1.437  | 3.99  |
| PLEKHA3   | 2.47   | 3.12  |
| PLEKHA3P1 | 1.51   | 2.23  |
| PLEKHA4   | 3.056  | 0.32  |
| PLEKHA5   | 4.238  | 3.06  |
| PLEKHA6   | 7.399  | 0.07  |
| PLEKHA7   | 4.801  | 0.08  |
| PLEKHA8   | 4.177  | 1.42  |
| PLEKHA9   | 1.839  | 0.21  |
| PLEKHB1   | 2.38   | 0.37  |
| PLEKHB2   | 4.523  | 18.4  |
| PLEKHC1   | 3.226  | 2.6   |
| PLEKHF1   | 2.084  | 0.28  |
| PLEKHF2   | 2.882  | 23.76 |
| PLEKHG1   | 8.471  | 5.56  |
| PLEKHG2   | 4.706  | 3.74  |
| PLEKHG3   | 4.4    | 1.73  |
| PLEKHG4   | 6.783  | 0.52  |
| PLEKHG5   | 5.57   | 0     |
| PLEKHG6   | 2.881  | 0.04  |
| PLEKHH1   | 6.512  | 0.08  |
| PLEKHH2   | 6.946  | 0.02  |
| PLEKHH3   | 2.983  | 0.04  |
| PLEKHJ1   | 1.215  | 10.91 |
| PLEKHK1   | 6.641  | 0.03  |
| PLEKHM1   | 5.263  | 11.64 |
| PLEKHM2   | 4.209  | 36.43 |

|         |        |       |
|---------|--------|-------|
| PLEKHN1 | 2.404  | 0     |
| PLEKHO1 | 1.615  | 50.79 |
| PLEKHQ1 | 3.67   | 3.53  |
| PLG     | 2.732  | 0     |
| PLGLA1  | 1.401  | 0     |
| PLGLB1  | 1.535  | 0.13  |
| PLGLB2  | 1.56   | 0.13  |
| PLIN    | 2.909  | 0     |
| PLK1    | 2.169  | 1.78  |
| PLK2    | 2.786  | 3.88  |
| PLK3    | 2.358  | 16.28 |
| PLK4    | 3.333  | 1.51  |
| PLLP    | 1.482  | 0     |
| PLN     | 1.684  | 0     |
| PLOD1   | 3.004  | 0.76  |
| PLOD2   | 4.06   | 2.12  |
| PLOD3   | 5.954  | 1.41  |
| PLP1    | 3.183  | 0     |
| PLP2    | 0.929  | 44.41 |
| PLRG1   | 1.783  | 9.43  |
| PLS1    | 3.639  | 0.05  |
| PLS3    | 3.089  | 0     |
| PLSCR1  | 3.011  | 14.33 |
| PLSCR2  | 1.265  | 0     |
| PLSCR3  | 1.746  | 3.23  |
| PLSCR4  | 3.207  | 0     |
| PLSCR5  | 1.058  | 0     |
| PLTP    | 1.745  | 0.62  |
| PLUNC   | 1.22   | 0     |
| PLVAP   | 2.276  | 23.69 |
| PLXDC1  | 6.122  | 0.14  |
| PLXDC2  | 2.594  | 0.38  |
| PLXNA1  | 8.998  | 1.34  |
| PLXNA2  | 6.263  | 0.22  |
| PLXNA3  | 6.746  | 2.01  |
| PLXNA4B | 4      | 0     |
| PLXNB1  | 7.097  | 0.24  |
| PLXNB2  | 6.934  | 36.95 |
| PLXNB3  | 6.145  | 0.56  |
| PLXNC1  | 5.12   | 0.48  |
| PLXND1  | 8.591  | 36.3  |
| PMAIP1  | 3.101  | 44.8  |
| PMCH    | 0.757  | 0.13  |
| PMCHL1  | 1.917  | 0     |
| PMF1    | 1.082  | 17.28 |
| PMFBP1  | 3.395  | 0.06  |
| PML     | 12.114 | 11.22 |
| PMM1    | 1.203  | 4.36  |
| PMM2    | 2.29   | 4.54  |
| PMP2    | 3.569  | 0     |

|          |        |        |
|----------|--------|--------|
| PMP22    | 3.159  | 0      |
| PMP22CD  | 1.098  | 0      |
| PMPCA    | 2.08   | 16.27  |
| PMPCB    | 7.838  | 8.89   |
| PMS1     | 3.696  | 4.44   |
| PMS2     | 5.61   | 1.22   |
| PMS2CL   | 36.07  | 0.37   |
| PMS2L1   | 3.41   | 1.08   |
| PMS2L2   | 2.164  | 0      |
| PMS2L3   | 3.296  | 1.89   |
| PMS2L5   | 1.496  | 0.07   |
| PMVK     | 1.28   | 5.1    |
| PNCK     | 1.525  | 0.06   |
| PNKD     | 5.362  | 1.44   |
| PNKP     | 1.716  | 10.43  |
| PNLDC1   | 1.92   | 0.26   |
| PNLIP    | 1.498  | 0      |
| PNLIPRP1 | 1.48   | 0      |
| PNLIPRP2 | 1.455  | 0      |
| PNLIPRP3 | 2.353  | 0      |
| PNMA1    | 2.643  | 1.83   |
| PNMA2    | 4.788  | 0      |
| PNMA3    | 3.517  | 0.48   |
| PNMA5    | 3.194  | 0      |
| PNMA6A   | 2.209  | 0      |
| PNMT     | 1.157  | 7.79   |
| PNN      | 2.598  | 159.45 |
| PNO1     | 1.978  | 2.1    |
| PNOC     | 1.196  | 0      |
| PNPLA1   | 2.808  | 0      |
| PNPLA10P | 0.36   | 0.55   |
| PNPLA2   | 3.16   | 29.28  |
| PNPLA3   | 2.805  | 0      |
| PNPLA4   | 2.815  | 0.6    |
| PNPLA5   | 2.504  | 0      |
| PNPLA6   | 4.432  | 6.56   |
| PNPLA7   | 5.246  | 10.01  |
| PNPLA8   | 7.064  | 2.94   |
| PNPO     | 2.397  | 0.66   |
| PNPT1    | 3.273  | 2.02   |
| PNRC1    | 2.065  | 61.57  |
| PNRC2    | 2.367  | 13.88  |
| PODN     | 3.01   | 0.04   |
| PODNL1   | 2.164  | 0.41   |
| PODXL    | 11.952 | 0.12   |
| PODXL2   | 2.151  | 1.75   |
| POF1B    | 3.941  | 0.03   |
| POFUT1   | 6.135  | 1.62   |
| POFUT2   | 8.565  | 1.4    |
| POGK     | 3.852  | 2.91   |

|         |       |       |
|---------|-------|-------|
| POGZ    | 7.691 | 25.45 |
| POL3S   | 1.662 | 1.48  |
| POLA1   | 5.437 | 1.09  |
| POLA2   | 2.474 | 3     |
| POLB    | 1.577 | 9.6   |
| POLD1   | 3.443 | 3.05  |
| POLD2   | 3.168 | 5.62  |
| POLD3   | 3.43  | 1.01  |
| POLD4   | 0.918 | 49.58 |
| POLDIP2 | 2.683 | 11.62 |
| POLDIP3 | 3.435 | 14.17 |
| POLE    | 7.84  | 8.57  |
| POLE2   | 1.69  | 0.64  |
| POLE3   | 2.185 | 23.77 |
| POLE4   | 0.696 | 8.39  |
| POLG    | 4.434 | 10.49 |
| POLG2   | 1.879 | 5.64  |
| POLH    | 3.464 | 4.26  |
| POLI    | 2.472 | 1.24  |
| POLK    | 4.075 | 4.95  |
| POLL    | 2.677 | 6.32  |
| POLM    | 5.147 | 1.88  |
| POLN    | 2.899 | 0     |
| POLQ    | 8.756 | 0.34  |
| POLR1A  | 5.398 | 1.96  |
| POLR1B  | 5.969 | 0.5   |
| POLR1C  | 1.439 | 5.85  |
| POLR1D  | 0.693 | 83.81 |
| POLR1E  | 1.854 | 4.21  |
| POLR2A  | 7.051 | 52.69 |
| POLR2B  | 3.748 | 37.14 |
| POLR2C  | 1.804 | 18.26 |
| POLR2CP | 1.624 | 0.55  |
| POLR2D  | 1.907 | 5.09  |
| POLR2E  | 1.226 | 25.9  |
| POLR2F  | 0.545 | 8.53  |
| POLR2G  | 0.827 | 21.06 |
| POLR2H  | 0.821 | 5.55  |
| POLR2I  | 0.872 | 8.17  |
| POLR2J  | 1.954 | 12.05 |
| POLR2J2 | 5.362 | 12.99 |
| POLR2J3 | 0.696 | 2.42  |
| POLR2K  | 0.971 | 10.39 |
| POLR2L  | 0.876 | 15.02 |
| POLR3A  | 5.609 | 1.64  |
| POLR3B  | 4.219 | 0.59  |
| POLR3C  | 1.851 | 8.98  |
| POLR3D  | 1.929 | 4.46  |
| POLR3E  | 2.608 | 7.63  |
| POLR3F  | 2.154 | 8.31  |



|           |        |       |
|-----------|--------|-------|
| POLR3G    | 0.996  | 0.5   |
| POLR3GL   | 1.165  | 9.17  |
| POLR3H    | 8.528  | 4.37  |
| POLR3K    | 0.796  | 2.49  |
| POLRMT    | 3.773  | 3.44  |
| POLS      | 4.509  | 14    |
| POM121    | 11.994 | 3.33  |
| POM121L1  | 12.011 | 0.09  |
| POM121L2  | 2.978  | 0     |
| POM121L4P | 1.284  | 0     |
| POMC      | 1.295  | 0.38  |
| POMGNT1   | 2.711  | 4.23  |
| POMP      | 1.317  | 21.78 |
| POMT1     | 7.337  | 31.97 |
| POMT2     | 4.866  | 0.77  |
| POMZP3    | 3.442  | 4.77  |
| PON1      | 4.786  | 0     |
| PON2      | 5.319  | 37.61 |
| PON3      | 2.382  | 0.29  |
| POP1      | 3.244  | 0.19  |
| POP2      | 0.294  | 0     |
| POP4      | 1.108  | 5     |
| POP5      | 0.833  | 5.11  |
| POP7      | 1.668  | 3.68  |
| POPDC2    | 1.646  | 0.36  |
| POPDC3    | 1.858  | 0     |
| POR       | 5.261  | 4.31  |
| PORCN     | 2.177  | 1.77  |
| POSTN     | 3.213  | 0     |
| POT1      | 5.262  | 1.23  |
| POTE15    | 2.132  | 0     |
| POTE2     | 2.429  | 0     |
| POTE8     | 1.976  | 0     |
| POU1F1    | 1.262  | 0     |
| POU2AF1   | 3.498  | 13.1  |
| POU2F1    | 2.949  | 4.53  |
| POU2F2    | 2.011  | 0.93  |
| POU2F3    | 2.87   | 0     |
| POU3F1    | 2.173  | 0     |
| POU3F2    | 4.087  | 0.02  |
| POU3F3    | 1.946  | 5.74  |
| POU3F4    | 1.475  | 0     |
| POU4F1    | 3.817  | 14.2  |
| POU4F2    | 3.098  | 0     |
| POU4F3    | 1.017  | 0.2   |
| POU5F1    | 5.586  | 0.19  |
| POU5F1P1  | 1.08   | 0     |
| POU6F1    | 2.911  | 0.58  |
| POU6F2    | 4.446  | 0     |
| PP1P      | 1.269  | 5.38  |

|          |        |        |
|----------|--------|--------|
| PP8961   | 0.447  | 0      |
| PPA1     | 1.302  | 17.78  |
| PPA2     | 2.015  | 4.96   |
| PPAN     | 1.662  | 10.72  |
| PPAP2A   | 1.778  | 1.95   |
| PPAP2B   | 3.795  | 0.03   |
| PPAP2C   | 1.791  | 0      |
| PPAPDC1A | 1.521  | 0      |
| PPAPDC1B | 0.843  | 3.29   |
| PPAPDC2  | 2.965  | 3.47   |
| PPAPDC3  | 2.05   | 0      |
| PPARA    | 13.437 | 0.42   |
| PPARBP   | 6.272  | 5.11   |
| PPARD    | 5.999  | 27.28  |
| PPARG    | 2.607  | 0.04   |
| PPARGC1A | 6.317  | 0      |
| PPARGC1B | 3.274  | 0.3    |
| PPAT     | 3.746  | 1.22   |
| PPBP     | 0.701  | 0      |
| PPCDC    | 2.219  | 1.07   |
| PPCS     | 1.431  | 8.22   |
| PPEF1    | 2.942  | 0      |
| PPEF2    | 3.414  | 0      |
| PPFIA1   | 5.576  | 2.29   |
| PPFIA2   | 4.052  | 0      |
| PPFIA3   | 4.721  | 0.17   |
| PPFIA4   | 5.045  | 0.34   |
| PPFIBP1  | 6.313  | 5.24   |
| PPFIBP2  | 3.503  | 0.34   |
| PPHLN1   | 4.939  | 5.65   |
| PPIA     | 5.033  | 15.2   |
| PPIAL    | 0.715  | 0.42   |
| PPIAL4   | 0.66   | 0      |
| PPIAP    | 0.759  | 0      |
| PPIAP10  | 0.446  | 0      |
| PPIAP11  | 0.746  | 0.67   |
| PPIAP13  | 0.852  | 0.12   |
| PPIAP14  | 0.818  | 0      |
| PPIAP15  | 0.8    | 0      |
| PPIAP16  | 0.867  | 0      |
| PPIAP17  | 0.786  | 0      |
| PPIAP2   | 0.495  | 0      |
| PPIAP3   | 0.505  | 0.2    |
| PPIAP4   | 0.714  | 0      |
| PPIAP5   | 0.721  | 0      |
| PPIAP6   | 0.843  | 0.23   |
| PPIAP7   | 0.87   | 0      |
| PPIAP9   | 3.979  | 0      |
| PPIB     | 1.028  | 100.86 |
| PPIC     | 1.236  | 0.16   |

|            |        |        |
|------------|--------|--------|
| PPID       | 1.834  | 4.59   |
| PPIE       | 1.619  | 9.41   |
| PPIF       | 2.201  | 4.99   |
| PPIG       | 2.706  | 17.51  |
| PPIH       | 0.982  | 11.69  |
| PPIHP1     | 0.744  | 1.73   |
| PPIL1      | 1.706  | 1.1    |
| PPIL1P1    | 2.014  | 0      |
| PPIL2      | 4.983  | 7.64   |
| PPIL3      | 2.06   | 8.07   |
| PPIL4      | 2.467  | 8.75   |
| PPIL5      | 2.646  | 1.53   |
| PPIL6      | 1.072  | 0.09   |
| PPL        | 6.238  | 0      |
| PPM1A      | 4.098  | 31.15  |
| PPM1B      | 7.298  | 12.86  |
| PPM1D      | 3.163  | 7.72   |
| PPM1E      | 6.54   | 0.04   |
| PPM1F      | 5.151  | 18.86  |
| PPM1G      | 2.36   | 30.1   |
| PPM1H      | 6.451  | 0      |
| PPM1J      | 1.714  | 2.77   |
| PPM1K      | 2.098  | 2.45   |
| PPM1L      | 3.056  | 0.29   |
| PPM1M      | 2.429  | 4.68   |
| PPM2C      | 4.199  | 1.91   |
| PPME1      | 2.453  | 6.66   |
| PPOX       | 1.694  | 4.15   |
| PPP1CA     | 1.635  | 35.94  |
| PPP1CB     | 9.652  | 26.37  |
| PPP1CC     | 2.428  | 21.93  |
| PPP1R10    | 13.557 | 0.01   |
| PPP1R11    | 4.821  | 0.04   |
| PPP1R12A   | 4.97   | 12.56  |
| PPP1R12B   | 21.195 | 0.4    |
| PPP1R12BP  | 70.856 | 0      |
| PPP1R12C   | 2.924  | 22.67  |
| PPP1R13B   | 4.833  | 0.82   |
| PPP1R13L   | 3.093  | 1.02   |
| PPP1R14A   | 0.718  | 0.55   |
| PPP1R14B   | 0.987  | 11.83  |
| PPP1R14BP1 | 0.59   | 2.18   |
| PPP1R14C   | 2.131  | 0.04   |
| PPP1R14D   | 0.749  | 0      |
| PPP1R15A   | 2.349  | 95.95  |
| PPP1R15B   | 5.222  | 12.01  |
| PPP1R16A   | 2.274  | 2.74   |
| PPP1R16B   | 6.251  | 127.56 |
| PPP1R1A    | 1.826  | 0      |
| PPP1R1B    | 2.869  | 1.56   |

|          |        |       |
|----------|--------|-------|
| PPP1R1C  | 1.557  | 0     |
| PPP1R2   | 3.313  | 9.5   |
| PPP1R2P1 | 10.636 | 0     |
| PPP1R2P2 | 1.238  | 0.08  |
| PPP1R2P3 | 1.991  | 1.09  |
| PPP1R2P9 | 0.87   | 0     |
| PPP1R3A  | 13.553 | 0.01  |
| PPP1R3B  | 3.807  | 3.97  |
| PPP1R3C  | 2.571  | 0     |
| PPP1R3D  | 3.466  | 1     |
| PPP1R3E  | 6.564  | 1.72  |
| PPP1R3F  | 2.941  | 0.94  |
| PPP1R7   | 1.293  | 9.71  |
| PPP1R8   | 3.672  | 8     |
| PPP1R8P  | 1.173  | 0.92  |
| PPP1R9A  | 19.382 | 0.06  |
| PPP1R9B  | 4.046  | 11.37 |
| PPP2CA   | 2.84   | 43.34 |
| PPP2CB   | 2.205  | 9.56  |
| PPP2CBP  | 1.442  | 0.34  |
| PPP2R1A  | 2.323  | 67.25 |
| PPP2R1B  | 5.873  | 1.72  |
| PPP2R2A  | 3.389  | 25.69 |
| PPP2R2B  | 3.558  | 0.03  |
| PPP2R2C  | 4.186  | 0.24  |
| PPP2R2D  | 2.18   | 8.94  |
| PPP2R3A  | 7.205  | 0.11  |
| PPP2R3B  | 2.786  | 2.77  |
| PPP2R3C  | 1.834  | 3.08  |
| PPP2R4   | 3.021  | 11.79 |
| PPP2R5A  | 4.03   | 41.22 |
| PPP2R5B  | 2.71   | 2.44  |
| PPP2R5C  | 9.322  | 15.41 |
| PPP2R5CP | 1.415  | 4.33  |
| PPP2R5D  | 3.449  | 4.76  |
| PPP2R5E  | 3.366  | 6.85  |
| PPP3CA   | 4.401  | 5.62  |
| PPP3CB   | 3.068  | 3.84  |
| PPP3CC   | 4.542  | 36.77 |
| PPP3R1   | 3.011  | 32.07 |
| PPP3R2   | 3.387  | 0     |
| PPP4C    | 1.969  | 37.44 |
| PPP4R1   | 3.834  | 14.81 |
| PPP4R1L  | 2.325  | 6.43  |
| PPP4R2   | 1.575  | 8.98  |
| PPP5C    | 2.062  | 5.81  |
| PPP6C    | 1.797  | 38.04 |
| PPRC1    | 5.338  | 1.59  |
| PPT1     | 2.33   | 9.98  |
| PPT2     | 7.518  | 0     |

|          |        |       |
|----------|--------|-------|
| PPTC7    | 4.084  | 11.78 |
| PPWD1    | 2.094  | 20.6  |
| PPY      | 0.457  | 0     |
| PPY2     | 1.503  | 0     |
| PPYR1    | 1.956  | 0     |
| PQBP1    | 2.108  | 24.26 |
| PQLC1    | 3.113  | 72.85 |
| PQLC2    | 2.659  | 0.67  |
| PQLC3    | 1.788  | 2.27  |
| PQWD     | 1.705  | 0.23  |
| PRAC     | 0.384  | 0     |
| PRAF2    | 1.263  | 10.89 |
| PRAM1    | 2.163  | 1     |
| PRAME    | 3.143  | 0.22  |
| PRAMEF1  | 1.606  | 0     |
| PRAMEF10 | 1.518  | 0     |
| PRAMEF12 | 1.909  | 0     |
| PRAMEF13 | 5.243  | 0     |
| PRAMEF15 | 1.863  | 0     |
| PRAMEF16 | 1.461  | 0     |
| PRAMEF19 | 2.127  | 0     |
| PRAMEF2  | 1.642  | 0     |
| PRAMEF20 | 1.506  | 0     |
| PRAMEF21 | 4.981  | 0     |
| PRAMEF3  | 2.104  | 0     |
| PRAMEF4  | 1.828  | 0     |
| PRAMEF5  | 1.855  | 0     |
| PRAMEF6  | 1.431  | 0     |
| PRAMEF7  | 1.425  | 0     |
| PRAMEF8  | 1.844  | 0     |
| PRAMEF9  | 1.874  | 0     |
| PRAP1    | 0.71   | 0     |
| PRB1     | 1.894  | 0     |
| PRB2     | 1.26   | 0     |
| PRB3     | 1.218  | 0     |
| PRB4     | 0.915  | 0     |
| PRC1     | 4.893  | 10.94 |
| PRCC     | 2.337  | 17.48 |
| PRCP     | 2.628  | 2.41  |
| PRDM1    | 5.319  | 11.29 |
| PRDM10   | 6.902  | 1.85  |
| PRDM11   | 2.229  | 0.09  |
| PRDM12   | 2.492  | 0     |
| PRDM13   | 3.234  | 0     |
| PRDM14   | 2.209  | 0     |
| PRDM15   | 7.827  | 1.38  |
| PRDM16   | 8.796  | 0     |
| PRDM2    | 11.971 | 36.21 |
| PRDM4    | 4.187  | 4.19  |
| PRDM5    | 2.48   | 0     |

|          |       |       |
|----------|-------|-------|
| PRDM6    | 2.674 | 0     |
| PRDM7    | 2.442 | 0     |
| PRDM8    | 3.405 | 16.01 |
| PRDM9    | 2.903 | 0     |
| PRDX1    | 1.646 | 33.6  |
| PRDX2    | 1.465 | 8.03  |
| PRDX2P1  | 0.913 | 0.87  |
| PRDX3    | 1.812 | 4.04  |
| PRDX4    | 0.921 | 6.76  |
| PRDX5    | 0.884 | 29.1  |
| PRDX6    | 1.67  | 59.95 |
| PREB     | 2.165 | 2.47  |
| PREI3    | 2.844 | 5.99  |
| PRELID1  | 1.191 | 9.97  |
| PRELID2  | 2.561 | 0.35  |
| PRELP    | 5.994 | 0.02  |
| PREP     | 2.849 | 4.76  |
| PREPL    | 6.273 | 0.36  |
| PREX1    | 7.695 | 39.33 |
| PRF1     | 2.491 | 6.95  |
| PRG2     | 2.357 | 0.08  |
| PRG3     | 0.868 | 0     |
| PRG4     | 0.1   | 5.94  |
| PRH1     | 0.651 | 0     |
| PRH2     | 3.28  | 0     |
| PRIC285  | 10.91 | 2.52  |
| PRICKLE1 | 3.293 | 0.03  |
| PRICKLE2 | 8.301 | 0     |
| PRIM1    | 1.462 | 0.74  |
| PRIM2A   | 2.291 | 0.95  |
| PRIMA1   | 3.65  | 0     |
| PRKAA1   | 5.398 | 7.75  |
| PRKAA2   | 2.435 | 0     |
| PRKAB1   | 2.401 | 11.62 |
| PRKAB2   | 5.423 | 5.43  |
| PRKACA   | 2.727 | 7.29  |
| PRKACB   | 5.609 | 2.08  |
| PRKACG   | 1.558 | 0.26  |
| PRKAG1   | 3.265 | 14.7  |
| PRKAG2   | 4.124 | 1.99  |
| PRKAG3   | 2.299 | 0     |
| PRKAR1A  | 5.895 | 24.22 |
| PRKAR1B  | 3.857 | 0.51  |
| PRKAR2A  | 2.381 | 2.95  |
| PRKAR2B  | 7.322 | 0.59  |
| PRKCA    | 8.77  | 3.31  |
| PRKCB1   | 6.359 | 29.56 |
| PRKCD    | 2.835 | 4.68  |
| PRKCDBP  | 1.037 | 0     |
| PRKCE    | 5.52  | 6.15  |

|         |        |       |
|---------|--------|-------|
| PRKCG   | 3.128  | 0.16  |
| PRKCH   | 4.492  | 25.11 |
| PRKCI   | 4.874  | 0.73  |
| PRKCO   | 3.26   | 0.85  |
| PRKCSH  | 2.509  | 74.65 |
| PRKCZ   | 2.921  | 0.17  |
| PRKD1   | 3.68   | 0     |
| PRKD2   | 3.246  | 31.15 |
| PRKD3   | 5.903  | 13.47 |
| PRKDC   | 13.508 | 4.64  |
| PRKG1   | 3.737  | 0     |
| PRKG2   | 3.328  | 0.15  |
| PRKRA   | 1.724  | 5.63  |
| PRKRIP1 | 4.346  | 14.25 |
| PRKRIR  | 3.19   | 10.14 |
| PRKX    | 7.549  | 47.76 |
| PRKXP1  | 6.573  | 0.93  |
| PRKY    | 7.216  | 6.12  |
| PRL     | 1.354  | 0     |
| PRLH    | 0.264  | 0     |
| PRLHR   | 1.113  | 0     |
| PRLR    | 3.145  | 0     |
| PRM1    | 0.394  | 0     |
| PRM2    | 0.683  | 0     |
| PRM3    | 0.474  | 0     |
| PRMT1   | 1.517  | 21.06 |
| PRMT2   | 2.596  | 9.87  |
| PRMT3   | 2.6    | 1.79  |
| PRMT5   | 2.671  | 2.41  |
| PRMT6   | 2.506  | 3.48  |
| PRMT7   | 2.39   | 4.14  |
| PRMT8   | 2.59   | 1.11  |
| PRND    | 3.98   | 0     |
| PRNP    | 2.554  | 11.51 |
| PRNPIP  | 1.743  | 11.07 |
| PRNT    | 2.333  | 0     |
| PRO0132 | 2.136  | 0     |
| PRO0611 | 0.57   | 1.04  |
| PRO0628 | 1.175  | 0.17  |
| PRO1853 | 3.392  | 2.16  |
| PRO2266 | 0.914  | 24.35 |
| PROC    | 1.755  | 0     |
| PROCA1  | 1.247  | 3.73  |
| PROCR   | 1.452  | 1.36  |
| PRODH   | 2.4    | 0.25  |
| PRODH2  | 1.677  | 0     |
| PROK1   | 1.372  | 0     |
| PROK2   | 1.404  | 0.07  |
| PROKR1  | 1.182  | 0     |
| PROKR2  | 1.257  | 10.39 |

|           |        |       |
|-----------|--------|-------|
| PROL1     | 0.946  | 0     |
| PROM1     | 3.794  | 1.15  |
| PROM2     | 3.822  | 0.03  |
| PROP1     | 1.464  | 0     |
| PROS1     | 3.275  | 0.06  |
| ProSAPiP1 | 5.247  | 4.22  |
| PROSC     | 2.995  | 1.75  |
| PROSP     | 33.856 | 0.01  |
| PROX1     | 3.075  | 0     |
| PROX2     | 1.779  | 0.05  |
| PROZ      | 1.485  | 0.06  |
| PRPF18    | 1.705  | 4.7   |
| PRPF19    | 2.153  | 31.85 |
| PRPF3     | 2.34   | 15.81 |
| PRPF31    | 2.128  | 15.25 |
| PRPF38A   | 3.342  | 10.34 |
| PRPF38B   | 3.369  | 34.16 |
| PRPF39    | 3.179  | 7.28  |
| PRPF4     | 2.735  | 7.88  |
| PRPF40A   | 8.28   | 13.7  |
| PRPF40B   | 3.801  | 0.81  |
| PRPF4B    | 7.94   | 14.62 |
| PRPF6     | 3.101  | 24.37 |
| PRPF8     | 7.578  | 41.76 |
| PRPH      | 1.833  | 0     |
| PRPH2     | 2.971  | 0     |
| PRPS1     | 2.051  | 16.3  |
| PRPS1L1   | 2.178  | 0.55  |
| PRPS2     | 2.702  | 0.92  |
| PRPSAP1   | 1.728  | 3.84  |
| PRPSAP2   | 1.89   | 1.99  |
| PRR10     | 1.768  | 0     |
| PRR11     | 1.317  | 2.4   |
| PRR12     | 7.396  | 2.49  |
| PRR13     | 1.554  | 22.35 |
| PRR14     | 2.118  | 12.75 |
| PRR15     | 3.355  | 0.59  |
| PRR16     | 1.764  | 0     |
| PRR17     | 1.466  | 0.27  |
| PRR3      | 6.762  | 0     |
| PRR4      | 0.507  | 0.78  |
| PRR5      | 2.574  | 0.84  |
| PRR6      | 1.164  | 1.19  |
| PRR7      | 1.478  | 1.8   |
| PRR8      | 8.72   | 8.17  |
| PRRC1     | 4.644  | 2.32  |
| PRRG1     | 4.457  | 0     |
| PRRG2     | 1.168  | 0.17  |
| PRRG3     | 1.594  | 0     |
| PRRG4     | 1.985  | 0.4   |



|         |        |        |
|---------|--------|--------|
| PRRT1   | 5.688  | 0      |
| PRRT2   | 2.372  | 2.25   |
| PRRT3   | 3.368  | 1.12   |
| PRRX1   | 7.424  | 0      |
| PRRX2   | 1.311  | 0      |
| PRSS1   | 1.6    | 0      |
| PRSS12  | 3.349  | 0      |
| PRSS16  | 2.71   | 0      |
| PRSS2   | 1.604  | 0      |
| PRSS21  | 1.565  | 10.75  |
| PRSS22  | 1.386  | 0      |
| PRSS23  | 3.734  | 0.43   |
| PRSS27  | 1.462  | 0.27   |
| PRSS29P | 3.002  | 0      |
| PRSS3   | 0.807  | 0      |
| PRSS33  | 1.598  | 0      |
| PRSS35  | 2.426  | 0      |
| PRSS36  | 2.809  | 0.46   |
| PRSS7   | 3.687  | 0      |
| PRSS8   | 1.938  | 0      |
| PRSSL1  | 1.089  | 8.27   |
| PRTFDC1 | 1.926  | 0.05   |
| PRTG    | 4.115  | 0      |
| PRTN3   | 1.001  | 5.93   |
| PRUNE   | 2.977  | 2.43   |
| PRUNE2  | 1.257  | 0      |
| PRX     | 9.902  | 39.17  |
| PRY     | 1.238  | 0      |
| PRY2    | 1.238  | 0      |
| PS3     | 1.646  | 0      |
| PS5     | 0.923  | 0.21   |
| PSAP    | 2.746  | 213.65 |
| PSAT1   | 2.188  | 0.32   |
| PSCA    | 1.02   | 0.29   |
| PSCD1   | 7.488  | 132.95 |
| PSCD2   | 1.534  | 13.74  |
| PSCD3   | 10.086 | 13.92  |
| PSCD4   | 3.202  | 23.48  |
| PSCDBP  | 2.643  | 44.62  |
| PSD     | 4.183  | 0.03   |
| PSD2    | 4.51   | 0      |
| PSD3    | 15.334 | 3.72   |
| PSD4    | 5.039  | 3.64   |
| PSEN1   | 2.764  | 9.45   |
| PSEN2   | 2.314  | 0.04   |
| PSENEEN | 0.665  | 9.97   |
| PSG1    | 2.276  | 0      |
| PSG11   | 1.995  | 0      |
| PSG2    | 1.523  | 0      |
| PSG3    | 1.86   | 0.11   |

|           |       |        |
|-----------|-------|--------|
| PSG4      | 2.032 | 0      |
| PSG5      | 1.607 | 0      |
| PSG6      | 1.849 | 0      |
| PSG7      | 1.99  | 0      |
| PSG8      | 1.281 | 0      |
| PSG9      | 1.701 | 0      |
| PSIP1     | 4.016 | 6.92   |
| PSIP1P    | 1.637 | 1.76   |
| psiSSX1   | 7.44  | 0      |
| psiSSX10  | 1.32  | 0      |
| psiSSX2   | 2.16  | 0      |
| psiSSX3   | 10.44 | 0      |
| psiSSX4   | 1.5   | 0      |
| psiSSX5   | 6.06  | 0      |
| psiSSX6   | 0.1   | 0      |
| psiSSX7   | 1.459 | 0      |
| psiSSX8   | 2.76  | 0      |
| psiSSX9   | 6.18  | 0      |
| psiTPTE22 | 48.35 | 0.69   |
| PSKH1     | 3.441 | 4.83   |
| PSKH2     | 1.158 | 0      |
| PSMA1     | 1.799 | 35.8   |
| PSMA2     | 2.932 | 13.9   |
| PSMA3     | 1.257 | 14.17  |
| PSMA3P    | 0.741 | 1.2    |
| PSMA4     | 1.174 | 23.93  |
| PSMA5     | 1.685 | 16.38  |
| PSMA6     | 1.466 | 89.22  |
| PSMA6P    | 0.979 | 70.33  |
| PSMA7     | 1.535 | 23.14  |
| PSMA7P    | 0.406 | 0      |
| PSMA8     | 1.967 | 0      |
| psMAGEA   | 5.114 | 0      |
| PSMAL     | 1.974 | 0      |
| PSMB1     | 0.882 | 100.06 |
| PSMB10    | 0.979 | 35.47  |
| PSMB2     | 0.845 | 35.83  |
| PSMB3     | 1.597 | 20.57  |
| PSMB3P    | 0.581 | 0.68   |
| PSMB4     | 1.316 | 121.64 |
| PSMB5     | 1.049 | 12.17  |
| PSMB6     | 0.826 | 25.51  |
| PSMB7     | 0.984 | 69.88  |
| PSMB8     | 5.319 | 0.04   |
| PSMB9     | 3.236 | 0.21   |
| PSMC1     | 1.854 | 5.6    |
| PSMC1P    | 1.558 | 4.07   |
| PSMC2     | 3.054 | 11.47  |
| PSMC3     | 1.545 | 53.02  |
| PSMC3IP   | 2.248 | 1.45   |

|          |       |       |
|----------|-------|-------|
| PSMC3P   | 1.305 | 10.84 |
| PSMC4    | 1.529 | 20.38 |
| PSMC5    | 1.54  | 33.02 |
| PSMC6    | 1.794 | 11.69 |
| PSMC6P   | 1.536 | 6.12  |
| PSMD1    | 3.227 | 7.63  |
| PSMD10   | 2.555 | 3.29  |
| PSMD10P  | 0.669 | 1.03  |
| PSMD11   | 2.039 | 14.32 |
| PSMD12   | 3.592 | 9.73  |
| PSMD13   | 2.008 | 21.97 |
| PSMD14   | 1.261 | 5.25  |
| PSMD15   | 1.563 | 2.02  |
| PSMD2    | 2.922 | 28.41 |
| PSMD3    | 2.428 | 27.67 |
| PSMD4    | 2.075 | 24.46 |
| PSMD4P2  | 3.406 | 3.95  |
| PSMD5    | 3.387 | 9.49  |
| PSMD6    | 1.649 | 38.7  |
| PSMD7    | 1.662 | 34.11 |
| PSMD8    | 1.508 | 20.07 |
| PSMD9    | 2.343 | 10.18 |
| PSME1    | 1.489 | 66.51 |
| PSME2    | 0.829 | 14.32 |
| PSME2P   | 0.78  | 3.17  |
| PSME3    | 3.281 | 12.69 |
| PSME4    | 7.132 | 16.2  |
| PSMF1    | 6.152 | 10.17 |
| PSORS1C1 | 2.581 | 0     |
| PSORS1C2 | 3.428 | 0     |
| PSPC1    | 2.307 | 41.47 |
| PSPH     | 4.236 | 0.88  |
| PSPN     | 0.471 | 0.21  |
| PSRC1    | 3.168 | 0.44  |
| PSTPIP1  | 2.156 | 10.92 |
| PSTPIP2  | 2.9   | 8.87  |
| PTAFR    | 1.822 | 0.7   |
| PTAR1    | 1.834 | 9.49  |
| PTBP1    | 4.436 | 31.82 |
| PTBP1P   | 0.652 | 3.03  |
| PTBP2    | 3.427 | 15.99 |
| PTCD1    | 6.158 | 2.73  |
| PTCD2    | 2.177 | 0.41  |
| PTCD3    | 7.066 | 5.82  |
| PTCH1    | 6.82  | 0.28  |
| PTCH2    | 3.624 | 0.3   |
| PTCHD1   | 2.682 | 0     |
| PTCHD2   | 5.655 | 0.07  |
| PTCHD3   | 2.368 | 0     |
| PTCRA    | 1.08  | 0     |

|         |        |        |
|---------|--------|--------|
| PTDSS1  | 2.504  | 20.82  |
| PTDSS2  | 2.445  | 6.83   |
| PTEN    | 5.903  | 18.39  |
| PTENP1  | 1.212  | 13.14  |
| PTER    | 3.872  | 0.51   |
| PTF1A   | 0.987  | 0      |
| PTGDR   | 2.942  | 2.72   |
| PTGDS   | 0.812  | 2.68   |
| PTGER1  | 1.421  | 0      |
| PTGER2  | 2.383  | 4.57   |
| PTGER3  | 10.994 | 0      |
| PTGER4  | 3.416  | 1.74   |
| PTGES   | 1.79   | 0.33   |
| PTGES2  | 3.167  | 3.84   |
| PTGES3  | 1.47   | 24.7   |
| PTGFR   | 9.727  | 0      |
| PTGFRN  | 6.16   | 0.04   |
| PTGIR   | 2.086  | 3.18   |
| PTGIS   | 5.603  | 0.02   |
| PTGS1   | 5.269  | 0.76   |
| PTGS2   | 4.465  | 0.2    |
| PTH     | 0.814  | 0      |
| PTHLH   | 3.062  | 0.04   |
| PTHR1   | 2.128  | 0.09   |
| PTHR2   | 2.713  | 0      |
| PTK2    | 4.758  | 8.38   |
| PTK2B   | 9.574  | 49.4   |
| PTK6    | 2.519  | 0.31   |
| PTK7    | 4.651  | 8.53   |
| PTK9P   | 2.954  | 1.31   |
| PTMA    | 3.376  | 114.94 |
| PTMAP1  | 2.583  | 0      |
| PTMAP2  | 1.514  | 1.96   |
| PTMAP3  | 1.392  | 0.92   |
| PTMAP4  | 1.286  | 1.77   |
| PTMAP6  | 0.17   | 0      |
| PTMAP7  | 1.06   | 35.1   |
| PTMS    | 1.15   | 41.64  |
| PTN     | 3.098  | 0      |
| PTOV1   | 3.404  | 22.3   |
| PTP4A1  | 5.082  | 10.04  |
| PTP4A2  | 4.098  | 31.6   |
| PTP4A3  | 3.834  | 33.21  |
| PTP4AP1 | 1.082  | 4.94   |
| PTP4AP2 | 1.395  | 1.35   |
| PTPDC1  | 4.82   | 0.31   |
| PTPLA   | 1.91   | 8.19   |
| PTPLAD1 | 1.864  | 4.04   |
| PTPLAD2 | 4.081  | 2.43   |
| PTPLB   | 4.261  | 2.81   |

|         |         |        |
|---------|---------|--------|
| PTPN1   | 3.722   | 44.44  |
| PTPN11  | 6.283   | 7.64   |
| PTPN12  | 6.859   | 24.7   |
| PTPN13  | 8.266   | 0.01   |
| PTPN14  | 6.262   | 10.26  |
| PTPN18  | 2.793   | 39.5   |
| PTPN2   | 3.278   | 4.89   |
| PTPN20A | 4.849   | 0      |
| PTPN20B | 2.478   | 0      |
| PTPN20C | 106.807 | 0      |
| PTPN21  | 4.223   | 0      |
| PTPN22  | 3.867   | 0.56   |
| PTPN23  | 5.222   | 6.1    |
| PTPN3   | 4.084   | 0.73   |
| PTPN4   | 3.943   | 1.46   |
| PTPN5   | 3.215   | 0.09   |
| PTPN6   | 2.633   | 49.6   |
| PTPN7   | 3.516   | 3.49   |
| PTPN9   | 3.938   | 2.86   |
| PTPNS1L | 2.487   | 0.71   |
| PTPRA   | 3.942   | 9.01   |
| PTPRB   | 6.329   | 0      |
| PTPRC   | 5.887   | 19.71  |
| PTPRCAP | 0.907   | 101.33 |
| PTPRD   | 6.252   | 0.04   |
| PTPRE   | 7.946   | 37.64  |
| PTPRF   | 7.697   | 4.38   |
| PTPRG   | 5.771   | 1.51   |
| PTPRH   | 3.895   | 0      |
| PTPRJ   | 5.122   | 2.67   |
| PTPRK   | 5.983   | 0      |
| PTPRM   | 5.053   | 0.18   |
| PTPRN   | 3.632   | 0      |
| PTPRN2  | 9.512   | 0.04   |
| PTPRO   | 8.003   | 1.08   |
| PTPRQ   | 10.103  | 0      |
| PTPRR   | 3.887   | 0      |
| PTPRS   | 6.501   | 0.04   |
| PTPRT   | 12.703  | 0      |
| PTPRU   | 5.783   | 0.09   |
| PTPRV   | 25.302  | 0      |
| PTPRZ1  | 16.315  | 0.01   |
| PTRF    | 3.562   | 0.2    |
| PTRH1   | 0.815   | 1.46   |
| PTRH2   | 2.117   | 3.79   |
| PTS     | 1.315   | 16.85  |
| PTS-P1  | 0.566   | 0      |
| PTTG1   | 0.712   | 4.3    |
| PTTG1IP | 7.728   | 33.7   |
| PTTG2   | 0.576   | 0.35   |

|        |        |       |
|--------|--------|-------|
| PTTG3  | 0.609  | 1.63  |
| PTTG4P | 0.48   | 0.41  |
| PTX3   | 1.871  | 0.27  |
| PUM1   | 6.608  | 22.52 |
| PUM2   | 7.012  | 18.12 |
| PUNC   | 3.103  | 0     |
| PURA   | 2.614  | 1.56  |
| PURB   | 18.142 | 3     |
| PURG   | 4.651  | 0.02  |
| PUS1   | 2.563  | 5.56  |
| PUS3   | 1.833  | 2.76  |
| PUS7   | 7.908  | 3.08  |
| PUS7L  | 3.943  | 0.36  |
| PUSL1  | 1.24   | 1.44  |
| PVALB  | 0.572  | 0     |
| PVR    | 3.197  | 0.03  |
| PVRIG  | 3.138  | 6.62  |
| PVRL1  | 6.114  | 0.1   |
| PVRL2  | 5.105  | 37.67 |
| PVRL3  | 1.65   | 0     |
| PVRL4  | 2.744  | 0     |
| PVT1   | 2.087  | 1.52  |
| PWCR1  | 1.236  | 0.96  |
| PWP1   | 1.853  | 14.47 |
| PWP2   | 3.26   | 2.55  |
| PWWP2  | 2.615  | 1.09  |
| PXDNL  | 2.258  | 0.13  |
| PXK    | 5.62   | 17.48 |
| PXMP2  | 0.957  | 4.76  |
| PXMP3  | 1.63   | 5.22  |
| PXMP4  | 2.987  | 0.33  |
| PXN    | 3.611  | 17.34 |
| PXT1   | 1.405  | 0     |
| PYCARD | 1.021  | 12.69 |
| PYCR1  | 2.702  | 1.98  |
| PYCR2  | 1.933  | 23.08 |
| PYCRL  | 2.332  | 0.55  |
| PYDC1  | 0.531  | 0.19  |
| PYGB   | 4.131  | 3.64  |
| PYGL   | 2.83   | 1.3   |
| PYGM   | 3.447  | 0.6   |
| PYGO1  | 1.26   | 0     |
| PYGO2  | 3.18   | 6.51  |
| PYHIN1 | 2.435  | 0.16  |
| PYY    | 1.053  | 0     |
| PYY2   | 2.077  | 0.1   |
| PZP    | 4.61   | 0.02  |
| QARS   | 2.43   | 89.37 |
| QDPR   | 1.502  | 3.49  |
| QKI    | 21.136 | 3.18  |

|           |        |       |
|-----------|--------|-------|
| QPCT      | 1.703  | 0.99  |
| QPCTL     | 1.533  | 1.55  |
| QPRT      | 1.555  | 3.18  |
| QRICH1    | 4.121  | 35.75 |
| QRICH2    | 5.359  | 1.48  |
| QRSL1     | 3.224  | 15.71 |
| QSCN6     | 4.356  | 4.38  |
| QSCN6L1   | 6.775  | 27.53 |
| QSER1     | 5.052  | 2.18  |
| QTRT1     | 1.312  | 19.23 |
| QTRTD1    | 3.996  | 5.43  |
| R3HCC1    | 1.625  | 8.4   |
| R3HDM1    | 4.647  | 3.11  |
| R3HDM2    | 3.776  | 13.08 |
| R3HDML    | 1.377  | 0     |
| RAB10     | 3.495  | 6.31  |
| RAB11A    | 2.393  | 19.55 |
| RAB11B    | 1.981  | 35.96 |
| RAB11FIP1 | 12.068 | 2.7   |
| RAB11FIP2 | 6.059  | 3.51  |
| RAB11FIP3 | 4.252  | 4.7   |
| RAB11FIP4 | 8.625  | 2.6   |
| RAB11FIP5 | 4.34   | 30.02 |
| RAB12     | 10.021 | 14.22 |
| RAB13     | 1.154  | 83.93 |
| RAB14     | 4.089  | 33.05 |
| RAB15     | 3.312  | 23.63 |
| RAB17     | 2.616  | 12.48 |
| RAB18     | 3.105  | 15.01 |
| RAB19B    | 1.59   | 0.12  |
| RAB1A     | 4.011  | 39.22 |
| RAB1B     | 1.906  | 26.27 |
| RAB1C     | 0.606  | 11.27 |
| RAB20     | 1.509  | 1.24  |
| RAB21     | 2.627  | 15.03 |
| RAB22A    | 8.651  | 2.2   |
| RAB23     | 3.153  | 0     |
| RAB24     | 3.322  | 10.36 |
| RAB25     | 1.022  | 0     |
| RAB26     | 1.624  | 0.12  |
| RAB27A    | 3.294  | 4.48  |
| RAB27B    | 1.336  | 0.15  |
| RAB28     | 1.847  | 2.68  |
| RAB2A     | 1.148  | 32.23 |
| RAB2B     | 2.308  | 12.95 |
| RAB30     | 1.602  | 8.27  |
| RAB31     | 3.952  | 1.13  |
| RAB32     | 1.206  | 0.58  |
| RAB33A    | 1.108  | 0.18  |
| RAB33B    | 3.869  | 2.2   |

|          |       |       |
|----------|-------|-------|
| RAB34    | 1.959 | 28.74 |
| RAB35    | 3.176 | 22.43 |
| RAB36    | 3.822 | 0.08  |
| RAB37    | 4.214 | 4.53  |
| RAB38    | 1.408 | 0     |
| RAB39    | 1.782 | 0     |
| RAB39B   | 3.483 | 0.26  |
| RAB3A    | 1.466 | 0.2   |
| RAB3B    | 1.552 | 1.65  |
| RAB3C    | 1.009 | 0     |
| RAB3D    | 1.879 | 1     |
| RAB3GAP1 | 4.179 | 8.52  |
| RAB3GAP2 | 5.121 | 5.76  |
| RAB3IL1  | 2.284 | 0     |
| RAB3IP   | 18.29 | 0.02  |
| RAB40A   | 1.346 | 0     |
| RAB40B   | 1.668 | 1.24  |
| RAB40C   | 2.612 | 2.38  |
| RAB41    | 1.028 | 0     |
| RAB42    | 1.093 | 0     |
| RAB43    | 4.447 | 29.88 |
| RAB43P   | 1.187 | 9.42  |
| RAB4A    | 1.843 | 7.14  |
| RAB4B    | 1.351 | 19.26 |
| RAB5A    | 3.096 | 17.68 |
| RAB5B    | 3.722 | 21.21 |
| RAB5C    | 1.772 | 91.51 |
| RAB6A    | 3.514 | 6.05  |
| RAB6B    | 5.222 | 0.05  |
| RAB6IP1  | 5.592 | 24.52 |
| RAB7A    | 2.232 | 60.47 |
| RAB7L1   | 2.444 | 2.63  |
| RAB8A    | 2.177 | 15.64 |
| RAB8B    | 4.877 | 2.64  |
| RAB9A    | 1.081 | 11.26 |
| RAB9B    | 1.049 | 0.19  |
| RAB9P1   | 0.625 | 0     |
| RABAC1   | 0.751 | 40.05 |
| RABEP1   | 6.024 | 15.7  |
| RABEP2   | 2.28  | 12.89 |
| RABEPK   | 1.437 | 2.96  |
| RABGAP1  | 4.799 | 7.69  |
| RABGAP1L | 3.31  | 4.04  |
| RABGEF1  | 7.466 | 2.79  |
| RABGGTA  | 2.368 | 4.3   |
| RABGGTB  | 2.858 | 25.03 |
| RABIF    | 2.43  | 0.65  |
| RABL2A   | 2.312 | 2.35  |
| RABL2B   | 2.338 | 3.56  |
| RABL3    | 3.337 | 3.08  |



|          |       |       |
|----------|-------|-------|
| RABL4    | 1.021 | 1.55  |
| RABL5    | 5.165 | 2.59  |
| RAC1     | 6.067 | 21.62 |
| RAC1P1   | 0.888 | 0     |
| RAC1P2   | 0.938 | 42.83 |
| RAC1P3   | 1.661 | 0     |
| RAC1P4   | 0.985 | 0.5   |
| RAC1P5   | 0.775 | 0     |
| RAC2     | 1.468 | 25.48 |
| RAC3     | 1.06  | 1.49  |
| RACGAP1  | 3.229 | 1.62  |
| RACGAP1P | 2.794 | 0.25  |
| RAD1     | 5.025 | 0.83  |
| RAD17    | 7.912 | 1.34  |
| RAD17P1  | 5.092 | 0.04  |
| RAD17P2  | 2.958 | 0.07  |
| RAD18    | 3.046 | 1.88  |
| RAD21    | 3.645 | 28.5  |
| RAD23A   | 2.035 | 30.29 |
| RAD23B   | 4.13  | 17.05 |
| RAD50    | 6.658 | 2.21  |
| RAD51    | 2.407 | 0.45  |
| RAD51AP1 | 2.113 | 1.64  |
| RAD51AP2 | 3.701 | 0     |
| RAD51C   | 1.686 | 0.76  |
| RAD51L1  | 3.717 | 0.24  |
| RAD51L3  | 2.384 | 0.87  |
| RAD52    | 3.179 | 4.2   |
| RAD54B   | 3.041 | 0.13  |
| RAD54L   | 3.096 | 0.9   |
| RAD54L2  | 4.895 | 6.17  |
| RAD9A    | 2.122 | 5.04  |
| RAD9B    | 2.879 | 0.04  |
| RAE1     | 2.527 | 11.75 |
| RAET1E   | 0.885 | 0     |
| RAET1F   | 0.463 | 0     |
| RAET1G   | 0.939 | 0     |
| RAET1L   | 0.741 | 0     |
| RAF1     | 4.909 | 27.21 |
| RAF1P1   | 1.734 | 0.12  |
| RAG1     | 6.571 | 13.08 |
| RAG1AP1  | 1.298 | 5.56  |
| RAG2     | 2.388 | 3.56  |
| RAGE     | 1.934 | 1.28  |
| RAI1     | 7.662 | 1.97  |
| RAI14    | 4.901 | 2.63  |
| RAI16    | 3.731 | 13.53 |
| RAI2     | 2.337 | 0     |
| RALA     | 5.592 | 1.43  |
| RALB     | 2.261 | 12.99 |

|          |        |       |
|----------|--------|-------|
| RALBP1   | 4.597  | 14.61 |
| RALGDS   | 3.632  | 11.87 |
| RALGPS1  | 6.336  | 0.33  |
| RALGPS2  | 3.504  | 0.68  |
| RALY     | 1.575  | 82.42 |
| RAMP1    | 0.91   | 4.13  |
| RAMP2    | 0.78   | 0     |
| RAMP3    | 2.624  | 0     |
| RAN      | 1.657  | 27.58 |
| RANBP1   | 0.884  | 13.21 |
| RANBP10  | 5.305  | 9.08  |
| RANBP17  | 4.44   | 0     |
| RANBP2   | 11.308 | 10.9  |
| RANBP20P | 2.337  | 6.39  |
| RANBP3   | 5.173  | 19.64 |
| RANBP3L  | 2.536  | 0.04  |
| RANBP5   | 6.002  | 15.7  |
| RANBP6   | 4.6    | 10.26 |
| RANBP9   | 3.424  | 31.38 |
| RANGAP1  | 3.021  | 10.41 |
| RANGNRF  | 0.83   | 7.39  |
| RANP1    | 3.15   | 0     |
| RAP1A    | 1.906  | 12.77 |
| RAP1AP   | 1.22   | 3.65  |
| RAP1B    | 3.593  | 58.02 |
| RAP1GAP  | 3.27   | 0.3   |
| RAP1GDS1 | 2.47   | 4.76  |
| RAP2A    | 4.351  | 3.39  |
| RAP2B    | 6.237  | 2.89  |
| RAP2C    | 3.933  | 5.51  |
| RAPGEF1  | 8.206  | 40.08 |
| RAPGEF2  | 9.329  | 15.47 |
| RAPGEF3  | 3.312  | 8.21  |
| RAPGEF4  | 4.261  | 0.26  |
| RAPGEF5  | 9.932  | 14.01 |
| RAPGEF6  | 6.37   | 2     |
| RAPGEFL1 | 3.356  | 1.3   |
| RAPH1    | 10.748 | 0.02  |
| RAPSN    | 1.664  | 1.24  |
| RARA     | 6.233  | 19.3  |
| RARB     | 3.54   | 0.03  |
| RARG     | 2.9    | 2.25  |
| RARRES1  | 1.803  | 0.05  |
| RARRES2  | 1.346  | 0.29  |
| RARRES3  | 0.758  | 9.27  |
| RARS     | 2.14   | 14.19 |
| RARS2    | 1.813  | 9.39  |
| RASA1    | 4.402  | 4.25  |
| RASA2    | 2.804  | 8.33  |
| RASA3    | 5.86   | 21.9  |

|          |        |       |
|----------|--------|-------|
| RASA4    | 11.152 | 0.63  |
| RASAL1   | 3.124  | 0.06  |
| RASAL2   | 7.201  | 12.03 |
| RASD1    | 1.746  | 70.78 |
| RASD2    | 2.973  | 0.04  |
| RASEF    | 2.761  | 0     |
| RASGEF1A | 3.235  | 0.34  |
| RASGEF1B | 2.269  | 1.44  |
| RASGEF1C | 3.484  | 0     |
| RASGRF1  | 5.34   | 0     |
| RASGRF2  | 4.078  | 0.07  |
| RASGRP1  | 4.948  | 0.7   |
| RASGRP2  | 4.892  | 64.26 |
| RASGRP3  | 4.554  | 1.26  |
| RASGRP4  | 3.606  | 0.58  |
| RASIP1   | 3.302  | 0.3   |
| RASL10A  | 2.548  | 6.44  |
| RASL10B  | 3.115  | 0.04  |
| RASL11A  | 1.543  | 0.77  |
| RASL11B  | 1.957  | 0.15  |
| RASL12   | 2.578  | 0.5   |
| RASSF1   | 5.913  | 15.47 |
| RASSF2   | 9.698  | 3.84  |
| RASSF3   | 3.154  | 28.49 |
| RASSF4   | 2.495  | 1.79  |
| RASSF5   | 8.573  | 10.99 |
| RASSF6   | 4.552  | 0     |
| RASSF7   | 1.53   | 2.39  |
| RASSF8   | 2.32   | 0.38  |
| RAVER1   | 3.097  | 4.69  |
| RAVER2   | 5.631  | 15.72 |
| RAX      | 1.712  | 0     |
| RAXL1    | 2.414  | 0     |
| RB1      | 4.74   | 4.05  |
| RB1CC1   | 6.912  | 15.49 |
| RBAK     | 8.458  | 1.8   |
| RBBP4    | 2.31   | 28.05 |
| RBBP5    | 3.683  | 1.53  |
| RBBP6    | 7.744  | 11.94 |
| RBBP7    | 2.237  | 22.16 |
| RBBP8    | 4.102  | 1.21  |
| RBBP9    | 3.861  | 0.15  |
| RBCK1    | 3.383  | 9.27  |
| RBED1    | 3.062  | 2.91  |
| RBJ      | 4.853  | 0.36  |
| RBKS     | 1.196  | 0.66  |
| RBL1     | 4.563  | 0.5   |
| RBL2     | 4.837  | 12.7  |
| RBM10    | 3.756  | 13.56 |
| RBM11    | 1.952  | 0.86  |

|          |        |        |
|----------|--------|--------|
| RBM12    | 7.886  | 16.99  |
| RBM12B   | 4.708  | 2.02   |
| RBM13    | 3.54   | 2.37   |
| RBM14    | 3.823  | 20.98  |
| RBM15    | 3.604  | 9.83   |
| RBM15B   | 6.919  | 14.35  |
| RBM16    | 5.004  | 32.46  |
| RBM17    | 5.006  | 44.01  |
| RBM18    | 1.066  | 6.68   |
| RBM19    | 5.274  | 7.58   |
| RBM20    | 7.108  | 0.22   |
| RBM22    | 2.297  | 21.1   |
| RBM23    | 2.413  | 16.85  |
| RBM24    | 2.37   | 0      |
| RBM25    | 5.397  | 33.78  |
| RBM26    | 4.022  | 10.8   |
| RBM28    | 5.616  | 1.25   |
| RBM3     | 2.564  | 91.91  |
| RBM33    | 14.325 | 14.65  |
| RBM34    | 1.402  | 15.24  |
| RBM35A   | 4.598  | 0      |
| RBM35B   | 5.313  | 7.87   |
| RBM38    | 4.714  | 222.91 |
| RBM39    | 5.859  | 80.58  |
| RBM4     | 1.928  | 62.92  |
| RBM41    | 1.662  | 1.01   |
| RBM43    | 2.72   | 1.31   |
| RBM4B    | 2.571  | 7.51   |
| RBM5     | 6.184  | 50.99  |
| RBM6     | 4.361  | 18.06  |
| RBM7     | 1.917  | 8.31   |
| RBM8A    | 2.787  | 15.02  |
| RBM8B    | 2.787  | 10.08  |
| RBM9     | 2.632  | 0.49   |
| RBMS1    | 3.37   | 0.53   |
| RBMS1P   | 1.394  | 2.7    |
| RBMS2    | 3.478  | 12.71  |
| RBMS3    | 3.218  | 0.89   |
| RBMX     | 3.186  | 35.37  |
| RBMX2    | 1.775  | 8.81   |
| RBMXL1   | 3.877  | 6.2    |
| RBMXP1   | 1.884  | 0.47   |
| RBMXP2   | 1.853  | 2.72   |
| RBMY1A1  | 2.276  | 0      |
| RBMY1A3P | 6.241  | 0      |
| RBMY1B   | 1.887  | 0      |
| RBMY1D   | 1.881  | 0      |
| RBMY1E   | 1.881  | 0      |
| RBMY1F   | 1.881  | 0      |
| RBMY1H   | 8.919  | 0      |

|        |        |       |
|--------|--------|-------|
| RBM1J  | 1.88   | 0     |
| RBM2AP | 12.125 | 0     |
| RBM2BP | 8.063  | 0     |
| RBM2CP | 12.13  | 0     |
| RBM2DP | 12.13  | 0     |
| RBM2EP | 6.949  | 0     |
| RBM2GP | 15.396 | 0     |
| RBM2HP | 6.511  | 0     |
| RBM2JP | 17.507 | 0.01  |
| RBM2KP | 14.971 | 0     |
| RBM2MP | 12.127 | 0     |
| RBM2NP | 4.623  | 0     |
| RBM2OP | 8.297  | 0     |
| RBM2QP | 13.075 | 0     |
| RBM2SP | 8.275  | 0.03  |
| RBM2TP | 7.024  | 0     |
| RBM2UP | 3.556  | 0     |
| RBM2VP | 6.531  | 0     |
| RBM2WP | 7.567  | 0     |
| RBM2XP | 7.557  | 0     |
| RBM2YP | 7.566  | 0     |
| RBM3AP | 4.75   | 0     |
| RBP1   | 0.713  | 0     |
| RBP2   | 0.688  | 0     |
| RBP3   | 4.276  | 0     |
| RBP4   | 0.929  | 0     |
| RBP5   | 0.94   | 2     |
| RBP7   | 0.636  | 0.47  |
| RBPJ   | 6.232  | 38.18 |
| RBPJL  | 2.491  | 0     |
| RBPJP1 | 1.118  | 0     |
| RBPMS  | 3.534  | 0.68  |
| RBPMS2 | 1.996  | 0.15  |
| RBX1   | 0.521  | 21.46 |
| RC3H1  | 6.968  | 5.94  |
| RC3H2  | 3.532  | 11.6  |
| RC74   | 2.54   | 2.03  |
| RCBTB1 | 5.932  | 40.41 |
| RCBTB2 | 3.175  | 7.38  |
| RCC1   | 2.535  | 21.74 |
| RCC2   | 4.064  | 24.18 |
| RCCD1  | 2.767  | 1.04  |
| RCE1   | 1.78   | 7.84  |
| RCHY1  | 7.968  | 1.45  |
| RCL1   | 2.063  | 3.02  |
| RCN1   | 2.107  | 18.83 |
| RCN2   | 4.975  | 102.8 |
| RCN3   | 1.854  | 6.51  |
| RCOR1  | 2.744  | 7.14  |
| RCOR2  | 2.931  | 1.89  |

|        |        |       |
|--------|--------|-------|
| RCOR3  | 4.513  | 13.33 |
| RCP9   | 2.096  | 7.23  |
| RCSD1  | 10.349 | 71.36 |
| RCVRN  | 1.175  | 0.08  |
| RD3    | 3.349  | 0     |
| RDBP   | 4.682  | 0     |
| RDH10  | 2.736  | 0.54  |
| RDH11  | 2.518  | 4.52  |
| RDH12  | 1.724  | 0.05  |
| RDH13  | 1.991  | 0.4   |
| RDH14  | 1.538  | 5.21  |
| RDH16  | 2.405  | 0.08  |
| RDH5   | 1.23   | 3.46  |
| RDH8   | 1.714  | 0     |
| RDHE2  | 3.039  | 0     |
| RDM1   | 1.364  | 0.14  |
| RDX    | 4.49   | 6.1   |
| RDXP2  | 2.719  | 0.22  |
| REC8L1 | 2.229  | 5.64  |
| RECK   | 4.412  | 0.72  |
| RECQL  | 3.122  | 3.67  |
| RECQL4 | 3.628  | 1.31  |
| RECQL5 | 8.009  | 1.78  |
| REEP1  | 3.851  | 0.03  |
| REEP2  | 2.099  | 0.04  |
| REEP3  | 2.294  | 1.6   |
| REEP4  | 1.852  | 20.89 |
| REEP5  | 2.997  | 12.05 |
| REEP6  | 1.373  | 0.14  |
| REG1A  | 0.808  | 0     |
| REG1B  | 0.773  | 0     |
| REG3A  | 1.073  | 0     |
| REG3G  | 0.953  | 0     |
| REG4   | 1.276  | 0     |
| REGL   | 2.925  | 0     |
| REL    | 3.242  | 11.66 |
| RELA   | 3.133  | 35.59 |
| RELB   | 2.27   | 4.05  |
| RELN   | 23.128 | 0     |
| REM1   | 1.656  | 0     |
| REM2   | 1.85   | 1.66  |
| REN    | 1.461  | 0     |
| RENBP  | 1.47   | 3.56  |
| REP15  | 1.139  | 0     |
| REPIN1 | 11.177 | 19.26 |
| REPS1  | 4.478  | 42.31 |
| REPS2  | 2.285  | 0     |
| RER1   | 2.94   | 12.42 |
| RERE   | 8.841  | 45.34 |
| RERG   | 2.217  | 0.04  |

|          |       |       |
|----------|-------|-------|
| RESP18   | 0.669 | 0     |
| REST     | 3.983 | 5.19  |
| RET      | 5.687 | 0     |
| RETN     | 0.478 | 6.83  |
| RETNLB   | 1.246 | 0     |
| RETSAT   | 3.001 | 4.74  |
| REV1     | 4.84  | 11.65 |
| REV3L    | 10.92 | 1.97  |
| REXO1    | 5.088 | 17.54 |
| REXO1L1  | 6.598 | 0     |
| REXO1L2P | 1.786 | 0     |
| REXO1L3P | 2.062 | 0     |
| REXO1L5P | 2.062 | 0     |
| REXO1L6P | 2.062 | 0     |
| REXO1L7P | 1.78  | 0     |
| REXO2    | 1.092 | 7.07  |
| REXO4    | 2.36  | 6.12  |
| RFC1     | 4.883 | 11.16 |
| RFC2     | 3.388 | 2.77  |
| RFC3     | 2.941 | 1.51  |
| RFC4     | 1.571 | 2.39  |
| RFC5     | 2.791 | 4.89  |
| RFESD    | 2.696 | 0.18  |
| RFFL     | 4.292 | 2.35  |
| RFK      | 2.683 | 0.63  |
| RFNG     | 1.828 | 8.88  |
| RFPL1    | 1.496 | 0     |
| RFPL1S   | 5.113 | 0     |
| RFPL2    | 1.492 | 0     |
| RFPL3    | 1.488 | 0.13  |
| RFPL3S   | 2.314 | 0.12  |
| RFPL4A   | 1.035 | 0     |
| RFPL4B   | 1.9   | 0     |
| RFT1     | 2.782 | 2.31  |
| RFTN1    | 3.105 | 38.39 |
| RFTN2    | 3.112 | 0     |
| RFWD2    | 2.839 | 4.67  |
| RFWD3    | 4.952 | 8.03  |
| RFX1     | 4.33  | 2.4   |
| RFX2     | 4.002 | 0.62  |
| RFX3     | 4.108 | 0.84  |
| RFX4     | 4.569 | 0     |
| RFX5     | 3.736 | 23.44 |
| RFXANK   | 1.519 | 4.3   |
| RFXAP    | 2.825 | 0.94  |
| RFXDC1   | 3.496 | 0     |
| RFXDC2   | 7.085 | 8.63  |
| RG9MTD1  | 1.611 | 8.35  |
| RG9MTD2  | 3.697 | 0.08  |
| RG9MTD3  | 1.828 | 0.7   |

|             |        |       |
|-------------|--------|-------|
| RGAG1       | 5.425  | 0     |
| RGAG4       | 4.336  | 0.84  |
| RGC32       | 3.592  | 21.65 |
| RGL1        | 5.363  | 19.06 |
| RGL2        | 8.73   | 0     |
| RGL3        | 2.26   | 0     |
| RGMA        | 3.216  | 0.15  |
| RGMB        | 6.501  | 0.24  |
| RGN         | 2.235  | 0.04  |
| RGNEF       | 7.135  | 0     |
| RGPD2       | 8.678  | 0.02  |
| RGPD3       | 9.747  | 0.07  |
| RGPD5       | 7.867  | 0.14  |
| RGPD6       | 13.003 | 0.09  |
| RGPD8       | 9.808  | 0.11  |
| Rgr         | 3.91   | 13.03 |
| RGS1        | 1.403  | 1.2   |
| RGS10       | 0.974  | 36.27 |
| RGS11       | 2.442  | 0     |
| RGS12       | 7.568  | 6.19  |
| RGS13       | 1.498  | 0     |
| RGS14       | 2.406  | 2.18  |
| RGS16       | 2.427  | 0.49  |
| RGS17       | 1.472  | 0.34  |
| RGS18       | 2.145  | 0     |
| RGS19       | 1.692  | 5.08  |
| RGS2        | 1.344  | 7.36  |
| RGS20       | 2.184  | 0.04  |
| RGS21       | 1.794  | 0     |
| RGS22       | 4.184  | 0     |
| RGS3        | 6.517  | 0.21  |
| RGS4        | 2.772  | 0     |
| RGS5        | 5.833  | 0.04  |
| RGS6        | 3.105  | 0     |
| RGS7        | 2.386  | 0     |
| RGS7BP      | 3.821  | 0     |
| RGS8        | 0.783  | 0     |
| RGS9        | 2.235  | 0.13  |
| RGS9BP      | 3.121  | 0     |
| RGSL1       | 2.06   | 0     |
| RGSL2       | 2.009  | 0     |
| RH_II/GuBp2 | 5.515  | 0     |
| RHAG        | 1.895  | 0     |
| RHBDD1      | 2.423  | 2.41  |
| RHBDD2      | 3.646  | 6.54  |
| RHBDD3      | 1.738  | 3.36  |
| RHBDF1      | 2.954  | 0.23  |
| RHBDF2      | 3.726  | 5.76  |
| RHBDL1      | 1.559  | 1.72  |
| RHBDL2      | 1.837  | 0     |



|             |       |        |
|-------------|-------|--------|
| RHBDL3      | 4.661 | 0.04   |
| RHBG        | 1.79  | 0      |
| RHCE        | 1.997 | 0.05   |
| RHCG        | 1.937 | 0      |
| RHD         | 2.833 | 0.28   |
| RHEB        | 2.991 | 3.74   |
| RHEBL1      | 1.177 | 0.17   |
| RHEBP1      | 1.351 | 1.68   |
| RH-II/GuBp1 | 2.71  | 0.69   |
| RHO         | 2.768 | 0      |
| RHOA        | 1.922 | 539.36 |
| RHOB        | 2.367 | 74.36  |
| RHOBTB1     | 4.671 | 0      |
| RHOBTB2     | 5.077 | 1.01   |
| RHOBTB3     | 4.124 | 0.38   |
| RHOC        | 1.088 | 78.38  |
| RHOD        | 1.097 | 0      |
| RHOF        | 2.435 | 8.28   |
| RHOG        | 1.286 | 62.24  |
| RHOH        | 1.498 | 38.24  |
| RHOJ        | 1.905 | 0      |
| RHOQ        | 2.127 | 5.3    |
| RHOQP       | 0.641 | 0.62   |
| RHOT1       | 5.537 | 1.93   |
| RHOT2       | 2.489 | 29.1   |
| RHOU        | 4.322 | 0.25   |
| RHOV        | 1.167 | 0.09   |
| RHPN1       | 3.124 | 16.31  |
| RHPN2       | 3.501 | 0.03   |
| RIBC1       | 3.077 | 0.12   |
| RIBC2       | 1.396 | 0.36   |
| RIC3        | 2.893 | 0.04   |
| RIC8A       | 2.702 | 16.66  |
| RIC8B       | 3.389 | 0.44   |
| RICS        | 6.48  | 0.04   |
| RICTOR      | 9.535 | 11.04  |
| RIF1        | 8.621 | 4.9    |
| RILP        | 1.792 | 2.37   |
| RIMBP2      | 6.321 | 0      |
| RIMKLP      | 1.84  | 3.87   |
| RIMS1       | 5.079 | 0      |
| RIMS2       | 4.449 | 0      |
| RIMS3       | 7.233 | 0.74   |
| RIMS4       | 5.136 | 0      |
| RIN1        | 2.684 | 2.28   |
| RIN2        | 4.244 | 1.45   |
| RIN3        | 3.849 | 12.62  |
| RING1       | 5.214 | 0.04   |
| RINT1       | 5.952 | 3.96   |
| RIOK1       | 2.728 | 3.16   |

|           |       |       |
|-----------|-------|-------|
| RIOK2     | 1.832 | 4.21  |
| RIOK3     | 5.659 | 14.69 |
| RIPK1     | 3.864 | 11.55 |
| RIPK2     | 2.585 | 14.12 |
| RIPK3     | 1.921 | 0.92  |
| RIPK4     | 3.872 | 4.65  |
| RIPK5     | 7.87  | 1.09  |
| RIT1      | 3.425 | 14.19 |
| RIT2      | 1.093 | 0     |
| RKHD1     | 2.132 | 0.42  |
| RKHD2     | 3.473 | 15.24 |
| RKHD3     | 3.398 | 0.23  |
| RLBP1     | 1.752 | 0     |
| RLF       | 6.228 | 21.73 |
| RLN1      | 0.967 | 0     |
| RLN2      | 1.466 | 0     |
| RLN3      | 0.452 | 0     |
| RLTPR     | 4.479 | 7.2   |
| RMI1      | 3.416 | 0.44  |
| RMND1     | 1.854 | 2.13  |
| RMND5A    | 4.441 | 14.73 |
| RMND5B    | 1.808 | 0.66  |
| RN7SK     | 0.332 | 3.88  |
| RN7SL1    | 0.299 | 11.91 |
| RN7SLP2   | 0.235 | 0.84  |
| RN7SLP5   | 0.217 | 0     |
| RNASE1    | 1.124 | 0     |
| RNASE10   | 0.651 | 0     |
| RNASE11   | 1.767 | 0     |
| RNASE12   | 0.444 | 0     |
| RNASE13   | 1.607 | 0     |
| RNASE2    | 0.735 | 4.04  |
| RNASE3    | 0.716 | 5.39  |
| RNASE4    | 1.997 | 0     |
| RNASE6    | 1.059 | 1.31  |
| RNASE7    | 1.466 | 0     |
| RNASE8    | 0.465 | 0     |
| RNASE9    | 0.618 | 0     |
| RNASEH1   | 1.648 | 6.9   |
| RNASEH1P1 | 0.801 | 0.5   |
| RNASEH1P2 | 0.829 | 0.83  |
| RNASEH1P3 | 0.856 | 0     |
| RNASEH2A  | 1.142 | 1.82  |
| RNASEH2B  | 1.927 | 17.31 |
| RNASEH2C  | 0.887 | 10.71 |
| RNASEL    | 4.148 | 0.64  |
| RNASEN    | 4.74  | 5.82  |
| RNASET2   | 5.865 | 78    |
| RND1      | 1.652 | 0.96  |
| RND2      | 4.152 | 0.19  |

|          |       |       |
|----------|-------|-------|
| RND3     | 2.683 | 0     |
| RNF10    | 4.287 | 35.49 |
| RNF103   | 5.402 | 22.49 |
| RNF11    | 3.139 | 15.95 |
| RNF111   | 5.538 | 5.11  |
| RNF113A  | 1.353 | 16.89 |
| RNF113B  | 1.378 | 0     |
| RNF11B   | 0.439 | 0.23  |
| RNF12    | 6.821 | 19.74 |
| RNF121   | 2.379 | 2.25  |
| RNF122   | 3.642 | 45.85 |
| RNF123   | 4.255 | 4.79  |
| RNF125   | 1.916 | 4.49  |
| RNF126   | 2.195 | 31.1  |
| RNF126P1 | 1.318 | 1.72  |
| RNF128   | 3.411 | 0     |
| RNF13    | 4.631 | 3.12  |
| RNF130   | 1.847 | 28.02 |
| RNF133   | 2.886 | 0     |
| RNF135   | 3.401 | 8.82  |
| RNF138   | 3.644 | 8.64  |
| RNF138P1 | 5.701 | 0.77  |
| RNF139   | 4.166 | 18.74 |
| RNF14    | 3.903 | 1.82  |
| RNF141   | 4.084 | 2.57  |
| RNF144   | 5.74  | 0.52  |
| RNF146   | 2.147 | 4.79  |
| RNF148   | 2.604 | 0     |
| RNF149   | 3.393 | 18.28 |
| RNF150   | 4.661 | 0     |
| RNF151   | 0.802 | 0     |
| RNF152   | 1.805 | 0.22  |
| RNF157   | 3.569 | 3.05  |
| RNF165   | 5.276 | 0     |
| RNF166   | 2.088 | 18.62 |
| RNF167   | 1.708 | 15.41 |
| RNF168   | 2.316 | 5.21  |
| RNF169   | 8.9   | 4.83  |
| RNF17    | 5.108 | 0     |
| RNF170   | 1.851 | 0.69  |
| RNF175   | 1.569 | 0.44  |
| RNF180   | 1.727 | 0.12  |
| RNF182   | 3.304 | 0.09  |
| RNF183   | 1.21  | 0     |
| RNF185   | 3.166 | 3.35  |
| RNF186   | 1.25  | 0     |
| RNF187   | 3.81  | 4.49  |
| RNF19    | 4.809 | 26.02 |
| RNF190   | 3.09  | 0     |
| RNF2     | 3.551 | 2.51  |

|         |        |       |
|---------|--------|-------|
| RNF20   | 3.94   | 4.72  |
| RNF207  | 1.859  | 0     |
| RNF208  | 0.752  | 0     |
| RNF212  | 2.332  | 0     |
| RNF213  | 13.023 | 11.27 |
| RNF214  | 2.338  | 2.75  |
| RNF24   | 1.909  | 5.75  |
| RNF25   | 1.561  | 6.78  |
| RNF26   | 2.786  | 11.33 |
| RNF31   | 3.505  | 7.23  |
| RNF32   | 3.492  | 0.23  |
| RNF34   | 2.195  | 5     |
| RNF38   | 5.756  | 11.08 |
| RNF39   | 11.471 | 0     |
| RNF4    | 2.947  | 23.2  |
| RNF40   | 4.233  | 10.24 |
| RNF41   | 3.846  | 5.89  |
| RNF43   | 6.006  | 1.52  |
| RNF44   | 4.58   | 42.72 |
| RNF5    | 3.381  | 0.06  |
| RNF5P1  | 1.088  | 1.64  |
| RNF6    | 4.368  | 10.8  |
| RNF7    | 3.01   | 26.53 |
| RNF8    | 9.585  | 0.79  |
| RNGTT   | 4.415  | 2.76  |
| RNH1    | 2.218  | 7.85  |
| RNMT    | 6.203  | 10.96 |
| RNMTL1  | 1.801  | 5.55  |
| RNPC3   | 0.411  | 1.2   |
| RNPEP   | 2.413  | 9.51  |
| RNPEPL1 | 2.913  | 24.45 |
| RNPS1   | 2.99   | 34.25 |
| RNR1    | 0.1    | 0     |
| RNR2    | 0.1    | 0     |
| RNU12   | 0.544  | 0.72  |
| RNU12P  | 0.73   | 0.94  |
| RNU1P10 | 0.164  | 3.02  |
| RNU1P6  | 0.162  | 0.61  |
| RNU1P7  | 0.154  | 0     |
| RNU1P8  | 0.264  | 0     |
| RNU1P9  | 0.164  | 0     |
| RNU2    | 0.187  | 0     |
| RNU2B   | 0.138  | 1.44  |
| RNU2P2  | 0.189  | 0.52  |
| RNU3    | 0.1    | 0     |
| RNU3P3  | 0.145  | 0     |
| RNU3P4  | 0.144  | 0     |
| RNU4B1  | 0.144  | 6.87  |
| RNU4P1  | 0.5    | 0     |
| RNU4P2  | 0.679  | 0     |

|               |        |       |
|---------------|--------|-------|
| RNU4P3        | 0.1    | 0     |
| RNU4P5        | 0.1    | 0.99  |
| RNU4P6        | 0.1    | 0.99  |
| RNU56B        | 0.1    | 0     |
| RNU5B         | 0.117  | 0     |
| RNU5C         | 0.117  | 0     |
| RNU5D         | 0.1    | 0     |
| RNU5E         | 0.119  | 0     |
| RNU5F         | 0.116  | 0     |
| RNU6B         | 0.1    | 0     |
| RNU7P4        | 0.1    | 0     |
| RNU86         | 0.1    | 11.87 |
| RNUXA         | 1.751  | 7.86  |
| RNY4P2        | 0.1    | 0     |
| RNY4P3        | 0.1    | 0     |
| RNY5          | 1.616  | 0     |
| ROBO1         | 7.647  | 0     |
| ROBO2         | 5.598  | 0     |
| ROBO3         | 4.569  | 8.85  |
| ROBO4         | 3.746  | 13.05 |
| ROCK1         | 4.513  | 20.26 |
| ROCK2         | 6.401  | 2.35  |
| ROD1          | 7.23   | 12.61 |
| ROGDI         | 1.458  | 9.71  |
| ROM1          | 1.464  | 1.08  |
| ROPN1         | 1.104  | 0     |
| ROPN1B        | 1.001  | 0     |
| ROPN1L        | 1.037  | 0.19  |
| ROR1          | 3.358  | 0.09  |
| ROR2          | 4.091  | 0.21  |
| RORA          | 2.558  | 0.81  |
| RORB          | 3.604  | 0     |
| RORC          | 3.214  | 0.15  |
| ROS1          | 7.368  | 0     |
| RP1           | 7.1    | 0     |
| RP11-114G1.1  | 2.768  | 0.85  |
| RP11-114H20.1 | 2.369  | 0     |
| RP11-11C5.2   | 2.475  | 0.64  |
| RP11-125A7.3  | 7.566  | 1.82  |
| RP11-130N24.1 | 10.693 | 0     |
| RP11-133N1.2  | 1.461  | 0     |
| RP11-138L21.1 | 0.861  | 0     |
| RP11-139H14.4 | 1.687  | 0     |
| RP11-145H9.1  | 5.752  | 0.11  |
| RP11-151A2.2  | 0.819  | 0.72  |
| RP11-162I21.1 | 3.037  | 17.95 |
| RP11-165H20.1 | 2.829  | 0     |
| RP11-167P23.2 | 0.457  | 0     |
| RP11-169K16.3 | 1.52   | 0     |
| RP11-184C23.1 | 2.863  | 0     |

|                |        |        |
|----------------|--------|--------|
| RP11-191L9.1   | 4.185  | 0      |
| RP11-193G17.1  | 1.197  | 134.48 |
| RP11-217H1.1   | 3.884  | 18.32  |
| RP11-218C14.6  | 24.014 | 0      |
| RP11-262D11.5  | 3.978  | 0.05   |
| RP11-262H14.4  | 1.48   | 0.07   |
| RP11-269F19.9  | 1.265  | 0.39   |
| RP1-127L4.6    | 0.805  | 0      |
| RP11-282A11.1  | 0.739  | 0      |
| RP11-291L22.2  | 19.525 | 0.12   |
| RP11-298P3.3   | 3.669  | 9.03   |
| RP11-301I17.1  | 2.624  | 0.07   |
| RP11-301J16.2  | 0.315  | 0      |
| RP11-320C15.1  | 0.835  | 6.16   |
| RP11-321G1.2   | 1.186  | 0      |
| RP11-327P2.4   | 0.718  | 0      |
| RP11-350O14.10 | 1.209  | 0.08   |
| RP11-35F15.2   | 1.281  | 0      |
| RP11-35N6.1    | 2.676  | 0      |
| RP11-365K22.1  | 1.324  | 4.85   |
| RP11-366N18.1  | 4.017  | 0      |
| RP11-38L15.1   | 3.497  | 0.08   |
| RP11-408E5.4   | 0.24   | 0      |
| RP11-410N8.4   | 0.846  | 0      |
| RP11-413M3.2   | 0.537  | 8.48   |
| RP11-430N14.1  | 0.531  | 0      |
| RP11-431O22.2  | 0.522  | 0.19   |
| RP11-444E17.2  | 1.647  | 0.48   |
| RP11-45J16.2   | 10.584 | 0      |
| RP11-460E7.5   | 3.577  | 0      |
| RP11-493K23.2  | 2.898  | 0      |
| RP11-493K23.3  | 2.237  | 0      |
| RP11-49G10.8   | 1.203  | 0      |
| RP1-14N1.3     | 9.118  | 0      |
| RP11-506K6.3   | 1.151  | 2.06   |
| RP11-50D16.3   | 3.549  | 5.04   |
| RP11-529I10.4  | 0.799  | 1.86   |
| RP1-153G14.3   | 1.224  | 0      |
| RP11-564C4.1   | 5.723  | 0.04   |
| RP11-56A21.1   | 4.672  | 1.36   |
| RP11-584P2.3   | 6.391  | 0      |
| RP11-61E5.1    | 0.86   | 4.72   |
| RP11-69O16.1   | 1.162  | 0      |
| RP11-763B22.5  | 0.486  | 0      |
| RP11-78J21.1   | 2.365  | 7.07   |
| RP11-87M18.1   | 0.903  | 0      |
| RP11-92J19.4   | 1.419  | 12.06  |
| RP11-93B10.1   | 4.105  | 0.79   |
| RP11-93B14.6   | 2.526  | 0      |
| RP11-95H8.1    | 4.226  | 0      |

|                 |       |       |
|-----------------|-------|-------|
| RP11-98I6.3     | 2.022 | 0     |
| RP1-27O5.1      | 1.623 | 0     |
| RP1-303F19.1    | 1.641 | 0.36  |
| RP13-102H20.1   | 3.083 | 0     |
| RP13-15M17.2    | 3.846 | 0.75  |
| RP1-32F7.2      | 3.156 | 0.04  |
| RP13-347D8.3    | 7.403 | 0     |
| RP13-36C9.1     | 1.492 | 0     |
| RP13-36C9.3     | 1.008 | 0     |
| RP13-36C9.6     | 1.008 | 0     |
| RP13-377G1__A.2 | 0.213 | 0     |
| RP1-57A13.2     | 1.72  | 0.69  |
| RP1-93H18.5     | 1.109 | 37.65 |
| RP1L1           | 7.978 | 0.07  |
| RP2             | 3.802 | 4.99  |
| RP3-340N1.3     | 0.768 | 0.64  |
| RP3-355C18.2    | 2.505 | 0     |
| RP3-377H14.5    | 8.511 | 0.04  |
| RP3-398D13.1    | 2.819 | 0.14  |
| RP3-402G11.5    | 6.668 | 51.74 |
| RP3-402H5.2     | 1.533 | 0     |
| RP3-405J24.3    | 0.548 | 27.81 |
| RP3-452H17.2    | 0.519 | 0     |
| RP3-474I12.5    | 0.72  | 0     |
| RP3-509I19.5    | 2.478 | 0.12  |
| RP3-510O8.5     | 0.488 | 0     |
| RP4-691N24.1    | 4.973 | 2.65  |
| RP4-692D3.1     | 2.988 | 0     |
| RP4-747L4.3     | 4.154 | 17.86 |
| RP4-753D5.2     | 0.502 | 0.79  |
| RP5-1022P6.2    | 5.047 | 22.9  |
| RP5-1054A22.3   | 6.412 | 0     |
| RP5-1077B9.4    | 2.588 | 8.79  |
| RP5-1103G7.6    | 2.119 | 0     |
| RP5-821D11.2    | 4.006 | 1.09  |
| RP5-854E16.2    | 1.23  | 8.93  |
| RP5-860F19.3    | 3.139 | 1     |
| RP5-875H10.1    | 6.089 | 0     |
| RP5-964H19.3    | 2.729 | 0     |
| RP6-166C19.1    | 1.288 | 0     |
| RP6-166C19.10   | 1.288 | 0     |
| RP6-166C19.11   | 1.288 | 0     |
| RP6-166C19.2    | 1.288 | 0     |
| RP6-166C19.3    | 1.288 | 0     |
| RP6-166C19.4    | 1.288 | 0     |
| RP6-166C19.5    | 1.288 | 0     |
| RP6-166C19.6    | 1.288 | 0     |
| RP6-166C19.9    | 1.288 | 0     |
| RP6-213H19.1    | 3.254 | 8.97  |
| RP9             | 2.242 | 6.31  |

|          |       |         |
|----------|-------|---------|
| RPA1     | 2.795 | 4       |
| RPA2     | 1.72  | 5.81    |
| RPA2P    | 1.427 | 0       |
| RPA3     | 3.188 | 0.9     |
| RPA4     | 1.56  | 0       |
| RPAIN    | 4.757 | 34.55   |
| RPAP1    | 4.672 | 3.28    |
| RPE      | 4.253 | 0.86    |
| RPE65    | 2.608 | 0       |
| RPESP    | 1.322 | 0       |
| RPGR     | 6.571 | 1.87    |
| RPGRIP1  | 3.861 | 0.05    |
| RPH3A    | 2.951 | 0.1     |
| RPH3AL   | 2.584 | 0.46    |
| RPIA     | 1.834 | 3.88    |
| RPIB9    | 4.486 | 0.4     |
| RPIP8    | 1.821 | 0.11    |
| RPL10    | 2.507 | 177.67  |
| RPL10A   | 0.719 | 707.7   |
| RPL10AP1 | 0.679 | 1.02    |
| RPL10AP2 | 0.716 | 88.85   |
| RPL10L   | 0.813 | 0.36    |
| RPL10P1  | 0.742 | 2.67    |
| RPL11    | 0.609 | 2507.7  |
| RPL12    | 0.631 | 516.48  |
| RPL12L2  | 0.612 | 0.65    |
| RPL12L3  | 0.625 | 0.95    |
| RPL12P10 | 2.91  | 0.04    |
| RPL12P3  | 0.396 | 0       |
| RPL12P4  | 0.497 | 46.58   |
| RPL12P5  | 0.392 | 0       |
| RPL12P6  | 0.564 | 0.18    |
| RPL12P7  | 0.545 | 0.36    |
| RPL13    | 1.322 | 1088.38 |
| RPL13A   | 1.127 | 1008.07 |
| RPL13AP2 | 0.573 | 7.6     |
| RPL13P2  | 0.659 | 35.58   |
| RPL14    | 0.971 | 500.6   |
| RPL14L   | 1.704 | 148.41  |
| RPL15    | 2.205 | 413.07  |
| RPL15P1  | 0.6   | 1.32    |
| RPL15P2  | 2.06  | 0.19    |
| RPL17    | 0.944 | 106.48  |
| RPL17P1  | 0.536 | 0.19    |
| RPL17P3  | 0.684 | 0       |
| RPL17P4  | 0.586 | 0.34    |
| RPL18    | 0.641 | 1534.53 |
| RPL18A   | 0.618 | 902.61  |
| RPL18AP1 | 0.61  | 7.3     |
| RPL18P1  | 0.571 | 0       |



|           |        |         |
|-----------|--------|---------|
| RPL19     | 2.27   | 174.43  |
| RPL19P1   | 0.428  | 0       |
| RPL21     | 1.4    | 2.61    |
| RPL21P1   | 0.954  | 0.62    |
| RPL21P10  | 0.885  | 0.44    |
| RPL21P11  | 0.56   | 0.88    |
| RPL21P12  | 0.9    | 0.22    |
| RPL21P13  | 0.49   | 0.41    |
| RPL21P2   | 0.491  | 0.2     |
| RPL21P4   | 0.492  | 0.8     |
| RPL21P8   | 0.594  | 0       |
| RPL21P9   | 0.713  | 0       |
| RPL22     | 2.085  | 190.94  |
| RPL22L1   | 2.054  | 6.5     |
| RPL22P2   | 0.46   | 1.72    |
| RPL23     | 0.577  | 1191.19 |
| RPL23A    | 0.97   | 119.24  |
| RPL23AP1  | 1.413  | 0       |
| RPL23AP10 | 0.513  | 0       |
| RPL23AP11 | 0.489  | 1.01    |
| RPL23AP13 | 2.304  | 0.43    |
| RPL23AP3  | 0.533  | 0       |
| RPL23AP4  | 0.473  | 0       |
| RPL23AP6  | 0.472  | 0.21    |
| RPL23AP7  | 16.573 | 0.03    |
| RPL23AP9  | 0.494  | 0.2     |
| RPL23P2   | 0.477  | 10.99   |
| RPL24     | 0.562  | 419.87  |
| RPL24P1   | 0.481  | 0.82    |
| RPL24P3   | 0.491  | 0.2     |
| RPL24P4   | 0.433  | 375.41  |
| RPL26     | 0.582  | 673.35  |
| RPL26L1   | 0.71   | 7.94    |
| RPL26P2   | 0.491  | 0.4     |
| RPL26P3   | 0.488  | 0.2     |
| RPL26P4   | 0.726  | 1.91    |
| RPL27     | 0.495  | 1391.51 |
| RPL27A    | 0.545  | 1477.34 |
| RPL27AP   | 0.833  | 1.66    |
| RPL27P1   | 0.465  | 187.66  |
| RPL28     | 4.209  | 264.23  |
| RPL29     | 0.695  | 448.85  |
| RPL29P1   | 0.463  | 0.21    |
| RPL29P2   | 0.657  | 0       |
| RPL3      | 1.514  | 992.12  |
| RPL30     | 0.505  | 2340.59 |
| RPL31     | 0.442  | 1388.93 |
| RPL31P1   | 0.405  | 1.22    |
| RPL31P10  | 0.408  | 4.85    |
| RPL31P2   | 0.379  | 1.04    |

|          |       |         |
|----------|-------|---------|
| RPL31P3  | 0.852 | 0       |
| RPL31P8  | 0.374 | 0       |
| RPL32    | 1.968 | 211     |
| RPL32L2  | 0.373 | 0.27    |
| RPL32P1  | 1.539 | 1.09    |
| RPL34    | 1.023 | 214.32  |
| RPL34P1  | 0.354 | 1.39    |
| RPL34P2  | 0.353 | 1.4     |
| RPL34P3  | 0.38  | 0       |
| RPL35    | 0.46  | 913.87  |
| RPL35A   | 0.484 | 1099.34 |
| RPL35AP  | 0.797 | 0       |
| RPL35AP2 | 0.258 | 5.37    |
| RPL36    | 0.606 | 849.94  |
| RPL36A   | 0.679 | 9.32    |
| RPL36AL  | 0.523 | 108.39  |
| RPL36AP2 | 0.767 | 0       |
| RPL36AP3 | 0.37  | 70.6    |
| RPL36AP4 | 0.264 | 0       |
| RPL36P1  | 0.228 | 0       |
| RPL36P2  | 0.319 | 0.31    |
| RPL37    | 1.57  | 591.6   |
| RPL37A   | 0.42  | 2323.84 |
| RPL37AP1 | 0.279 | 659.22  |
| RPL37P1  | 0.284 | 5.92    |
| RPL37P2  | 0.366 | 198.14  |
| RPL38    | 0.447 | 1395.74 |
| RPL38P1  | 0.24  | 0       |
| RPL39    | 0.401 | 231.18  |
| RPL39L   | 0.703 | 0.71    |
| RPL39P   | 0.156 | 0       |
| RPL39P2  | 0.365 | 0       |
| RPL39P3  | 0.385 | 872.45  |
| RPL3L    | 1.529 | 0       |
| RPL3P1   | 1.265 | 1.25    |
| RPL3P2   | 2.479 | 0       |
| RPL3P4   | 0.478 | 537.33  |
| RPL4     | 1.432 | 624.44  |
| RPL41    | 1.019 | 28.55   |
| RPL41P1  | 0.413 | 622.37  |
| RPL41P2  | 0.407 | 3.16    |
| RPL41P3  | 1.177 | 1.51    |
| RPL41P4  | 0.429 | 1.85    |
| RPL5     | 1.031 | 891.2   |
| RPL5P2   | 0.854 | 0       |
| RPL6     | 1.183 | 203.56  |
| RPL7     | 0.837 | 7.69    |
| RPL7A    | 1.157 | 336.75  |
| RPL7AL2  | 0.308 | 0.32    |
| RPL7AL3  | 0.285 | 0       |

|            |        |         |
|------------|--------|---------|
| RPL7AL4    | 0.776  | 0.64    |
| RPL7AP1    | 0.802  | 2.72    |
| RPL7AP5    | 0.881  | 0.45    |
| RPL7AP6    | 0.881  | 70.19   |
| RPL7AP7    | 0.89   | 0.11    |
| RPL7AP8    | 0.865  | 0.12    |
| RPL7L1     | 1.275  | 3.34    |
| RPL7P      | 0.834  | 44.96   |
| RPL7P2     | 0.268  | 0       |
| RPL7P3     | 0.715  | 0       |
| RPL7P6     | 1.386  | 0.71    |
| RPL8       | 0.975  | 1578.02 |
| RPL9       | 0.898  | 15.65   |
| RPL9P6     | 0.714  | 0       |
| RPL9P7     | 0.703  | 0.28    |
| RPL9P8     | 0.704  | 12.93   |
| RPLP0      | 1.312  | 1038.76 |
| RPLP0-like | 1.179  | 521.87  |
| RPLP0P1    | 0.456  | 0       |
| RPLP0P2    | 27.939 | 0.76    |
| RPLP1      | 0.512  | 3552.27 |
| RPLP1P1    | 0.968  | 7.36    |
| RPLP2      | 0.493  | 2229.8  |
| RPN1       | 2.341  | 27.55   |
| RPN2       | 2.49   | 13.75   |
| RPP14      | 1.872  | 7.35    |
| RPP21      | 1.566  | 0       |
| RPP25      | 2.333  | 0       |
| RPP30      | 2.612  | 3.82    |
| RPP38      | 1.545  | 4.48    |
| RPP40      | 1.159  | 0.34    |
| RPPH1      | 0.341  | 9.87    |
| RPRM       | 1.471  | 0       |
| RPRML      | 1.093  | 0       |
| RPS10      | 0.618  | 255.03  |
| RPS10L     | 0.611  | 0.97    |
| RPS10P2    | 0.494  | 1.8     |
| RPS10P3    | 0.577  | 2.57    |
| RPS11      | 0.609  | 2971.85 |
| RPS11P1    | 0.473  | 0       |
| RPS12      | 0.503  | 1322.38 |
| RPS12P1    | 0.307  | 0       |
| RPS13      | 0.529  | 1180.88 |
| RPS14      | 1.105  | 746.46  |
| RPS15      | 0.531  | 765.97  |
| RPS15A     | 0.568  | 1033.27 |
| RPS15AP1   | 0.296  | 32.76   |
| RPS15AP2   | 0.362  | 0       |
| RPS15AP3   | 0.414  | 0       |
| RPS16      | 0.59   | 2232.12 |

|          |       |         |
|----------|-------|---------|
| RPS17    | 0.485 | 1345.55 |
| RPS17P2  | 0.493 | 7.43    |
| RPS18    | 1.626 | 0.73    |
| RPS18P1  | 0.458 | 0       |
| RPS18P2  | 0.538 | 377.36  |
| RPS19    | 0.849 | 1151.82 |
| RPS19BP1 | 0.927 | 16.11   |
| RPS19P1  | 0.468 | 346.91  |
| RPS19P2  | 0.441 | 239.6   |
| RPS2     | 1.118 | 478.75  |
| RPS20    | 0.523 | 1278.99 |
| RPS20P1  | 0.459 | 0.21    |
| RPS20P3  | 0.5   | 1.58    |
| RPS20P4  | 0.46  | 0.43    |
| RPS21    | 0.396 | 976.88  |
| RPS23    | 3.314 | 353.95  |
| RPS23P1  | 0.505 | 47.02   |
| RPS24    | 0.702 | 1541.98 |
| RPS24P1  | 7.38  | 0       |
| RPS24P2  | 0.522 | 103.68  |
| RPS24P3  | 0.557 | 4.8     |
| RPS25    | 0.492 | 1480.63 |
| RPS26    | 1.281 | 7.64    |
| RPS26e   | 0.892 | 0.33    |
| RPS26L   | 4.714 | 0.04    |
| RPS26L1  | 0.566 | 0       |
| RPS26P10 | 0.908 | 0.11    |
| RPS26P3  | 0.451 | 0.22    |
| RPS26P4  | 0.44  | 0       |
| RPS26P6  | 0.348 | 0       |
| RPS27    | 0.356 | 35.57   |
| RPS27A   | 0.541 | 416.97  |
| RPS27AP1 | 0.547 | 0.18    |
| RPS27AP2 | 0.465 | 0.64    |
| RPS27AP4 | 0.507 | 0       |
| RPS27L   | 1.084 | 3.83    |
| RPS27P3  | 0.255 | 584.7   |
| RPS28    | 0.583 | 10.35   |
| RPS29    | 0.829 | 483.95  |
| RPS29P1  | 0.204 | 0       |
| RPS2L1   | 0.966 | 1.12    |
| RPS2P2   | 0.928 | 0.85    |
| RPS2P3   | 0.87  | 1.6     |
| RPS2P4   | 0.942 | 1.89    |
| RPS2P6   | 0.98  | 0.91    |
| RPS3     | 0.841 | 2731.19 |
| RPS3A    | 1.772 | 6.98    |
| RPS3AP1  | 0.365 | 0       |
| RPS3AP3  | 0.242 | 0.41    |
| RPS3AP6  | 0.859 | 0.35    |

|         |       |         |
|---------|-------|---------|
| RPS3P1  | 0.192 | 0       |
| RPS3P2  | 0.71  | 0       |
| RPS4L   | 0.394 | 4.27    |
| RPS4L2  | 0.612 | 31.85   |
| RPS4X   | 0.956 | 1265.79 |
| RPS4Y1  | 0.897 | 243.76  |
| RPS4Y2  | 0.79  | 206.39  |
| RPS5    | 0.741 | 1074.96 |
| RPS5L   | 0.688 | 0.14    |
| RPS5P1  | 0.623 | 292.84  |
| RPS6    | 0.829 | 2056.44 |
| RPS6KA1 | 3.383 | 8.57    |
| RPS6KA2 | 6.053 | 15.9    |
| RPS6KA3 | 7.71  | 3.9     |
| RPS6KA4 | 3.253 | 2.83    |
| RPS6KA5 | 4.493 | 0.37    |
| RPS6KA6 | 2.616 | 0       |
| RPS6KB1 | 5.319 | 16.35   |
| RPS6KB2 | 2.322 | 11.89   |
| RPS6KC1 | 4.182 | 0.57    |
| RPS6KL1 | 3.017 | 1.71    |
| RPS6P1  | 0.786 | 1.89    |
| RPS7    | 0.955 | 114.89  |
| RPS7P1  | 0.585 | 189.59  |
| RPS8    | 0.705 | 1481.25 |
| RPS9    | 1.011 | 905.8   |
| RPS9P1  | 0.684 | 7.67    |
| RPS9P2  | 0.723 | 239.61  |
| RPSA    | 1.153 | 204.66  |
| RPSAP1  | 0.88  | 0.22    |
| RPSAP10 | 0.881 | 0.56    |
| RPSAP14 | 0.379 | 1.56    |
| RPSAP15 | 1.041 | 0.47    |
| RPSAP3  | 1.032 | 0.68    |
| RPSAP4  | 1.03  | 0.57    |
| RPSAP5  | 1.026 | 0.2     |
| RPTN    | 2.529 | 0       |
| RPUSD1  | 2.05  | 4.2     |
| RPUSD2  | 1.839 | 2.69    |
| RPUSD3  | 1.201 | 1.16    |
| RPUSD4  | 2.146 | 11.07   |
| ROCD1   | 2.721 | 29.27   |
| RRAD    | 1.441 | 0.28    |
| RRAGA   | 1.652 | 13.84   |
| RRAGB   | 2.138 | 3.56    |
| RRAGC   | 1.867 | 13.15   |
| RRAGD   | 1.45  | 3.69    |
| RRAS    | 0.983 | 4.53    |
| RRAS2   | 1.499 | 5.87    |
| RRBP1   | 5.612 | 24.7    |

|         |       |       |
|---------|-------|-------|
| RREB1   | 8.352 | 15.05 |
| RRH     | 1.558 | 0     |
| RRM1    | 3.104 | 7.3   |
| RRM2    | 2.473 | 3     |
| RRM2B   | 4.93  | 3.29  |
| RRM2P3  | 1.163 | 1.62  |
| RRM2P4  | 0.566 | 0     |
| RRN3    | 3.746 | 10.75 |
| RRP12   | 4.364 | 3.7   |
| RRP15   | 1.34  | 0.96  |
| RRP9    | 1.543 | 2.12  |
| RRS1    | 1.706 | 2.84  |
| RS1     | 3.032 | 0     |
| RSAD1   | 2.499 | 2.34  |
| RSAD2   | 3.512 | 0.14  |
| RSBN1   | 6.593 | 7.59  |
| RSBN1L  | 6.182 | 3.09  |
| RSC1A1  | 5.424 | 22.38 |
| RSF1    | 5.134 | 8.58  |
| RSHL1   | 2.456 | 0.04  |
| RSHL2   | 2.177 | 0.73  |
| RSHL3   | 2.825 | 0.14  |
| RSL1D1  | 1.932 | 44.19 |
| RSPO1   | 2.985 | 11.6  |
| RSPO2   | 2.801 | 0     |
| RSPO3   | 2.141 | 0     |
| RSPO4   | 2.707 | 0     |
| RSPRY1  | 2.072 | 9.07  |
| RSRC1   | 1.634 | 2.36  |
| RSRC2   | 4.097 | 39.39 |
| RSU1    | 3.806 | 1.84  |
| RTBDN   | 1.328 | 0     |
| RTCD1   | 1.537 | 9.79  |
| RTDR1   | 1.252 | 0     |
| RTL1    | 5.256 | 4.48  |
| RTF1    | 5.003 | 13.58 |
| RTKN    | 3.049 | 0.65  |
| RTL1    | 4.077 | 0     |
| RTN1    | 4.461 | 0     |
| RTN2    | 3.37  | 0.38  |
| RTN3    | 8.397 | 3.75  |
| RTN4    | 9.911 | 17.14 |
| RTN4IP1 | 1.667 | 0.53  |
| RTN4R   | 1.919 | 0.11  |
| RTN4RL1 | 3.164 | 0.1   |
| RTN4RL2 | 1.263 | 0.16  |
| RTP1    | 2.183 | 0     |
| RTP2    | 1.346 | 0     |
| RTP3    | 0.817 | 0     |
| RTP4    | 1.014 | 1.47  |

|         |        |        |
|---------|--------|--------|
| RTTN    | 7.098  | 1.8    |
| RUFY1   | 3.213  | 4.52   |
| RUFY2   | 2.701  | 4.98   |
| RUFY3   | 5.919  | 2.15   |
| RUFY4   | 3.567  | 0      |
| RUNDC1  | 3.828  | 4.5    |
| RUNDC2A | 2.248  | 2.9    |
| RUNDC2B | 1.22   | 0.16   |
| RUNDC2C | 39.987 | 0.07   |
| RUNX1   | 8.379  | 7.09   |
| RUNX1T1 | 4.301  | 0      |
| RUNX2   | 6.334  | 0.47   |
| RUNX3   | 5.475  | 15.45  |
| RUSC1   | 2.163  | 2.56   |
| RUSC2   | 5.199  | 1.16   |
| RUTBC1  | 4.867  | 16.2   |
| RUTBC2  | 6.057  | 0.02   |
| RUTBC3  | 3.403  | 19.05  |
| RUVBL1  | 1.736  | 2.17   |
| RUVBL2  | 1.488  | 9.11   |
| RWDD1   | 1.691  | 15.27  |
| RWDD2   | 1.279  | 0.46   |
| RWDD3   | 1.078  | 4.41   |
| RWDD4A  | 2.566  | 0.84   |
| RXFP1   | 2.412  | 0      |
| RXFP2   | 2.803  | 0      |
| RXFP3   | 1.854  | 0      |
| RXFP4   | 1.125  | 0.27   |
| RXRA    | 5.428  | 1      |
| RXRB    | 8.626  | 0.01   |
| RXRG    | 2.116  | 0      |
| RY1     | 1.404  | 6.76   |
| RYBP    | 2.914  | 18.1   |
| RYK     | 3.067  | 6.36   |
| RYR1    | 15.359 | 0      |
| RYR2    | 15.73  | 0      |
| RYR3    | 15.559 | 0.1    |
| S100A1  | 0.594  | 32.48  |
| S100A10 | 0.639  | 32.36  |
| S100A11 | 0.594  | 8.99   |
| S100A12 | 0.466  | 23.78  |
| S100A13 | 1.519  | 54.58  |
| S100A14 | 1.043  | 0      |
| S100A16 | 1.068  | 363.41 |
| S100A2  | 0.963  | 0.72   |
| S100A3  | 0.738  | 0.27   |
| S100A4  | 0.562  | 76.58  |
| S100A5  | 0.71   | 0      |
| S100A6  | 0.683  | 98.65  |
| S100A7  | 0.438  | 0      |

|          |        |        |
|----------|--------|--------|
| S100A7A  | 4.279  | 0      |
| S100A7L2 | 0.306  | 0      |
| S100A8   | 0.408  | 205.15 |
| S100A9   | 0.575  | 226.61 |
| S100B    | 1.096  | 0      |
| S100G    | 0.453  | 0      |
| S100P    | 0.51   | 7.76   |
| S100PBP  | 4.612  | 5.77   |
| S100Z    | 1.017  | 1.36   |
| SAA1     | 0.779  | 0      |
| SAA2     | 0.527  | 0      |
| SAA3P    | 4.086  | 0      |
| SAA4     | 0.614  | 0      |
| SAAL1    | 1.51   | 5.96   |
| SAC      | 5.051  | 0      |
| SAC3D1   | 1.538  | 0.52   |
| SACM1L   | 3.519  | 9.79   |
| SACS     | 14.79  | 0.53   |
| SAE1     | 2.109  | 20.78  |
| SAE2     | 2.665  | 7.27   |
| SAFB     | 4.451  | 36.19  |
| SAFB2    | 3.417  | 17.95  |
| SAG      | 1.565  | 0.06   |
| SAGE1    | 3.046  | 0      |
| SALF     | 3.824  | 0.05   |
| SALL1    | 4.669  | 0.02   |
| SALL2    | 4.913  | 0.76   |
| SALL3    | 4.775  | 0      |
| SALL4    | 3.452  | 0.31   |
| SAMD1    | 0.663  | 4.62   |
| SAMD10   | 2.176  | 1.55   |
| SAMD11   | 2.554  | 0.58   |
| SAMD12   | 2.1    | 0      |
| SAMD13   | 1.565  | 0.06   |
| SAMD14   | 1.859  | 0.43   |
| SAMD3    | 2.432  | 0.12   |
| SAMD4A   | 2.338  | 0.8    |
| SAMD4B   | 4.495  | 7.08   |
| SAMD7    | 2.265  | 0.04   |
| SAMD8    | 3.303  | 13.66  |
| SAMD9    | 14.225 | 1.3    |
| SAMD9L   | 14.264 | 0.93   |
| SAMHD1   | 2.701  | 1.76   |
| SAMM50   | 1.716  | 7.21   |
| SAMSN1   | 1.888  | 3.46   |
| SAP130   | 4.061  | 4      |
| SAP18    | 2.022  | 40.32  |
| SAP30    | 1.391  | 102.35 |
| SAP30BP  | 4.036  | 27.01  |
| SAP30L   | 1.42   | 3.69   |



|          |       |        |
|----------|-------|--------|
| SAPS1    | 3.777 | 42.7   |
| SAPS2    | 6.413 | 13.02  |
| SAPS3    | 7.571 | 20.82  |
| SAR1A    | 2.986 | 26.67  |
| SAR1B    | 1.365 | 2.83   |
| SAR1P3   | 0.573 | 2.76   |
| SARDH    | 3.344 | 1      |
| SARM1    | 6.861 | 0.3    |
| SARS     | 1.895 | 34.77  |
| SARS2    | 2.057 | 3.85   |
| SART1    | 3.561 | 26.59  |
| SART3    | 3.776 | 12.44  |
| SAS10    | 2.035 | 17.65  |
| SASH1    | 7.709 | 0      |
| SASP     | 2.172 | 1      |
| SASS6    | 3.899 | 0.81   |
| SAS-ZFAT | 0.939 | 0.42   |
| SAT1     | 2.471 | 158.28 |
| SAT2     | 0.933 | 12.73  |
| SATB1    | 4.982 | 18.37  |
| SATB2    | 4.998 | 0      |
| SATL1    | 1.616 | 0.92   |
| SAV1     | 3.031 | 13.94  |
| SBDS     | 3.21  | 16.58  |
| SBDSP    | 10.68 | 1.42   |
| SBEM     | 0.396 | 0      |
| SBF1     | 8.209 | 20.55  |
| SBF2     | 7.405 | 6.11   |
| SBK1     | 4.992 | 0.28   |
| SBNO1    | 4.179 | 4.61   |
| SBNO2    | 4.877 | 15.99  |
| SBSN     | 0.957 | 0      |
| SC4MOL   | 2.288 | 1.04   |
| SC4MOP   | 0.882 | 0      |
| SC5DL    | 2.993 | 31.9   |
| SC65     | 2.602 | 0.04   |
| SCAMP1   | 8.202 | 0.83   |
| SCAMP2   | 2.04  | 17.99  |
| SCAMP3   | 1.883 | 6.67   |
| SCAMP4   | 2.526 | 3.6    |
| SCAMP5   | 3.382 | 0.32   |
| SCAND1   | 0.997 | 35.23  |
| SCAND2   | 6.81  | 1.36   |
| SCAP     | 4.255 | 8.07   |
| SCARA3   | 3.832 | 0      |
| SCARA5   | 3.643 | 0      |
| SCARB1   | 2.555 | 8.75   |
| SCARB2   | 4.748 | 6.57   |
| SCARF1   | 8.081 | 3.63   |
| SCARF2   | 3.624 | 0.25   |

|          |       |       |
|----------|-------|-------|
| SCARNA1  | 0.166 | 0     |
| SCARNA11 | 0.137 | 0     |
| SCARNA12 | 0.27  | 9.89  |
| SCARNA15 | 0.127 | 0     |
| SCARNA16 | 0.417 | 9.02  |
| SCARNA17 | 0.421 | 8.22  |
| SCARNA2  | 0.42  | 1.18  |
| SCARNA20 | 0.13  | 0     |
| SCARNA21 | 0.138 | 1.43  |
| SCARNA22 | 0.125 | 0     |
| SCARNA23 | 0.13  | 0     |
| SCARNA3  | 0.144 | 0     |
| SCARNA4  | 0.129 | 0     |
| SCARNA5  | 0.278 | 0.36  |
| SCARNA6  | 0.266 | 0.37  |
| SCARNA7  | 0.33  | 4.5   |
| SCARNA8  | 0.131 | 4.53  |
| SCARNA9  | 0.353 | 17.38 |
| SCC-112  | 6.714 | 8.81  |
| SCCPDH   | 2.474 | 5.12  |
| SCD      | 5.468 | 0.51  |
| SCD5     | 4.207 | 0.35  |
| SCEL     | 2.422 | 0     |
| SCFD1    | 2.603 | 5.89  |
| SCFD2    | 3.176 | 1.43  |
| SCG2     | 2.476 | 0     |
| SCG3     | 3.31  | 0     |
| SCG5     | 1.151 | 0     |
| SCGB1A1  | 0.425 | 0     |
| SCGB1C1  | 0.431 | 0     |
| SCGB1D1  | 0.429 | 0     |
| SCGB1D2  | 0.438 | 0     |
| SCGB1D4  | 0.434 | 0     |
| SCGB2A1  | 0.518 | 0     |
| SCGB2A2  | 0.502 | 0     |
| SCGB3A1  | 0.466 | 0.64  |
| SCGB3A2  | 0.515 | 0     |
| SCGN     | 1.482 | 0     |
| SCHIP1   | 2.394 | 5.21  |
| SCIN     | 5.14  | 0     |
| SCLT1    | 2.816 | 1.33  |
| SCLY     | 2.412 | 1.23  |
| SCMH1    | 5.016 | 15.6  |
| SCML1    | 3.392 | 2.24  |
| SCML2    | 4.131 | 4.81  |
| SCML4    | 2.055 | 0.14  |
| SCN10A   | 5.874 | 0     |
| SCN11A   | 6.502 | 0.06  |
| SCN1A    | 8.082 | 0     |
| SCN1B    | 2.278 | 3     |

|          |       |       |
|----------|-------|-------|
| SCN2A    | 9.191 | 0     |
| SCN2B    | 4.921 | 0.02  |
| SCN3A    | 9.093 | 0.19  |
| SCN3B    | 6.885 | 0.92  |
| SCN4A    | 7.805 | 22.14 |
| SCN4B    | 4.486 | 0     |
| SCN5A    | 8.663 | 0.04  |
| SCN7A    | 5.377 | 0     |
| SCN8A    | 7.006 | 0.31  |
| SCN9A    | 6.357 | 0     |
| SCNM1    | 1.484 | 11.4  |
| SCNN1A   | 3.135 | 0.41  |
| SCNN1B   | 2.544 | 0     |
| SCNN1D   | 2.503 | 3.44  |
| SCNN1G   | 3.499 | 0     |
| SCO1     | 1.701 | 5.06  |
| SCO2     | 0.929 | 1.49  |
| SCOC     | 1.958 | 2.43  |
| SCOTIN   | 2.166 | 28.37 |
| SCP2     | 4.928 | 3.07  |
| SCPEP1   | 1.919 | 17.32 |
| SCRG1    | 0.903 | 0.44  |
| SCRIB    | 5.208 | 5.08  |
| SCRL     | 3.1   | 0     |
| SCRN1    | 10.42 | 0.24  |
| SCRN2    | 1.469 | 18.99 |
| SCRN3    | 2.468 | 0.92  |
| SCRT1    | 3.552 | 0     |
| SCRT2    | 3.577 | 0     |
| SCT      | 0.514 | 0.2   |
| SCTR     | 1.701 | 0     |
| SCUBE1   | 2.992 | 0.1   |
| SCUBE2   | 3.737 | 0.48  |
| SCUBE3   | 5.115 | 0.06  |
| SCYE1    | 2.151 | 15.69 |
| SCYE1P   | 0.912 | 1.84  |
| SCYL1    | 2.57  | 13.86 |
| SCYL1BP1 | 2.186 | 2.49  |
| SCYL2    | 3.807 | 9.02  |
| SCYL3    | 3.577 | 0.89  |
| SDAD1    | 2.753 | 3.45  |
| SDC1     | 3.592 | 0.11  |
| SDC2     | 3.485 | 13.65 |
| SDC3     | 1.461 | 0.07  |
| SDC4     | 2.613 | 0.12  |
| SDC4P    | 0.467 | 0     |
| SDCBP    | 2.371 | 13.27 |
| SDCBP2   | 1.633 | 0.3   |
| SDCCAG1  | 4.121 | 13.23 |
| SDCCAG10 | 2.08  | 2.57  |

|          |        |       |
|----------|--------|-------|
| SDCCAG3  | 2.379  | 1.54  |
| SDCCAG3L | 1.089  | 0.09  |
| SDCCAG8  | 2.403  | 6.21  |
| SDF2     | 1.075  | 13.07 |
| SDF2L1   | 0.874  | 2.94  |
| SDF4     | 3.33   | 12.1  |
| SDHA     | 2.276  | 25.43 |
| SDHALP1  | 3.157  | 7.24  |
| SDHALP2  | 46.009 | 1.47  |
| SDHAP3   | 23.621 | 1.18  |
| SDHB     | 1.098  | 19.01 |
| SDHC     | 5.281  | 1.33  |
| SDHD     | 1.313  | 4.07  |
| SDHDP6   | 1.292  | 0.92  |
| SDHDP7   | 1.29   | 1.23  |
| SDK1     | 13.998 | 0.03  |
| SDK2     | 9.37   | 8.2   |
| SDPR     | 3.221  | 0     |
| SDR-O    | 0.942  | 0     |
| SDS      | 1.605  | 0.25  |
| SDSL     | 1.397  | 0.07  |
| SEBOX    | 1.641  | 0     |
| SEC11A   | 1.383  | 26.39 |
| SEC11B   | 0.894  | 3.87  |
| SEC11C   | 0.782  | 5.82  |
| SEC13    | 1.574  | 21.56 |
| SEC14L1  | 13.661 | 99.78 |
| SEC14L2  | 2.817  | 0.25  |
| SEC14L3  | 2.064  | 0     |
| SEC14L4  | 2.499  | 0.08  |
| SEC14L5  | 6.522  | 0     |
| SEC22A   | 1.793  | 1.6   |
| SEC22B   | 1.821  | 9.56  |
| SEC22C   | 2.547  | 7.69  |
| SEC23A   | 3.841  | 4.28  |
| SEC23B   | 3.949  | 2.96  |
| SEC23IP  | 4.243  | 2.94  |
| SEC24A   | 7.063  | 1.4   |
| SEC24B   | 4.743  | 15.5  |
| SEC24C   | 4.734  | 21.11 |
| SEC24D   | 3.99   | 0.89  |
| SEC31A   | 4.237  | 7.85  |
| SEC31B   | 5.11   | 15.28 |
| SEC61A1  | 3.997  | 40.42 |
| SEC61A2  | 2.608  | 17.49 |
| SEC61B   | 0.562  | 68.3  |
| SEC61G   | 1.102  | 7     |
| SEC63    | 3.849  | 39.58 |
| SEC63D1  | 2.668  | 0     |
| SECISBP2 | 4.383  | 13.88 |

|          |        |       |
|----------|--------|-------|
| SECTM1   | 2.002  | 2.03  |
| SEDLP2   | 0.536  | 0     |
| SEDLP3   | 4.634  | 0     |
| SEDLP4   | 10.816 | 0     |
| SEDLP5   | 7.767  | 0     |
| SEH1L    | 4.18   | 6.08  |
| SEL1L    | 7.853  | 6.18  |
| SEL1L2   | 1.903  | 0     |
| SELE     | 3.833  | 0     |
| SELENBP1 | 1.705  | 1.56  |
| SELI     | 8.093  | 3.12  |
| SELK     | 0.818  | 14.75 |
| SELL     | 2.324  | 4.09  |
| SELM     | 0.691  | 2.29  |
| SELP     | 3.199  | 0     |
| SELPLG   | 2.543  | 2.53  |
| SELS     | 1.878  | 1.8   |
| SELT     | 3.49   | 12.82 |
| SELV     | 1.704  | 0     |
| SEMA3A   | 5.046  | 0     |
| SEMA3B   | 3.069  | 0.2   |
| SEMA3C   | 10.353 | 0     |
| SEMA3D   | 12.522 | 0     |
| SEMA3E   | 12.947 | 0     |
| SEMA3F   | 3.516  | 0.12  |
| SEMA3G   | 4.7    | 0.02  |
| SEMA4A   | 3.23   | 1.14  |
| SEMA4B   | 4.063  | 0.9   |
| SEMA4C   | 3.522  | 0.36  |
| SEMA4D   | 5.338  | 15.44 |
| SEMA4F   | 4.273  | 0.44  |
| SEMA4G   | 4.4    | 0.22  |
| SEMA5A   | 8.021  | 0     |
| SEMA5B   | 4.707  | 0.71  |
| SEMA6A   | 15.453 | 50.66 |
| SEMA6B   | 4.634  | 0.47  |
| SEMA6C   | 4.917  | 19.3  |
| SEMA6D   | 10.56  | 0     |
| SEMA7A   | 2.66   | 0.71  |
| SEMG1    | 2.755  | 0     |
| SEMG2    | 1.982  | 0     |
| SENP1    | 4.726  | 1.32  |
| SENP2    | 3.198  | 14.75 |
| SENP3    | 2.411  | 6.6   |
| SENP5    | 4.093  | 9.57  |
| SENP6    | 4.715  | 11.29 |
| SENP7    | 4.732  | 4.73  |
| SENP8    | 1.439  | 0     |
| SEP15    | 3.001  | 28.02 |
| SEPHS1   | 2.6    | 6.13  |

|           |       |        |
|-----------|-------|--------|
| SEPHS2    | 2.273 | 19.19  |
| SEPN1     | 4.332 | 28.89  |
| SEPP1     | 2.086 | 2.37   |
| SEPT1     | 1.59  | 2.86   |
| SEPT10    | 3.254 | 0      |
| SEPT11    | 5.555 | 3.17   |
| SEPT12    | 1.29  | 0.08   |
| SEPT2     | 4.554 | 48.92  |
| SEPT3     | 5.85  | 0      |
| SEPT4     | 2.841 | 0.14   |
| SEPT5     | 3.525 | 0.25   |
| SEPT6     | 8.577 | 23.72  |
| SEPT7     | 4.969 | 10.03  |
| SEPT9     | 4.1   | 110.25 |
| SEPW1     | 0.88  | 6.07   |
| SEPW1P    | 1.521 | 1.1    |
| SEPX1     | 1.367 | 2.24   |
| SERAC1    | 3.915 | 0.2    |
| SERBP1    | 6.914 | 9.46   |
| SERBP1P   | 3.059 | 2.33   |
| SERF1A    | 3.778 | 0      |
| SERF2     | 0.967 | 121.96 |
| SERGEF    | 1.494 | 2.19   |
| SERHL     | 1.346 | 3.23   |
| SERHL2    | 1.374 | 2.73   |
| SERINC1   | 3.128 | 52.47  |
| SERINC2   | 1.997 | 5.8    |
| SERINC3   | 3.652 | 19.62  |
| SERINC4   | 1.49  | 7.77   |
| SERINC5   | 4.747 | 26.3   |
| SERP1     | 2.464 | 30.88  |
| SERPINA1  | 2.154 | 6.29   |
| SERPINA10 | 2.453 | 0      |
| SERPINA11 | 1.471 | 0      |
| SERPINA12 | 2.061 | 0      |
| SERPINA13 | 1.718 | 0      |
| SERPINA2  | 1.752 | 0      |
| SERPINA3  | 1.59  | 0      |
| SERPINA4  | 1.661 | 0      |
| SERPINA5  | 2.227 | 0      |
| SERPINA6  | 1.492 | 0      |
| SERPINA7  | 1.559 | 0      |
| SERPINA9  | 1.346 | 0      |
| SERPINB1  | 2.719 | 32.6   |
| SERPINB10 | 1.194 | 0.08   |
| SERPINB11 | 1.179 | 0      |
| SERPINB12 | 1.218 | 0      |
| SERPINB13 | 3.114 | 0      |
| SERPINB2  | 1.901 | 0.47   |
| SERPINB3  | 1.694 | 0.06   |

|           |        |       |
|-----------|--------|-------|
| SERPINB4  | 1.698  | 0     |
| SERPINB5  | 2.557  | 0     |
| SERPINB6  | 1.646  | 23.32 |
| SERPINB7  | 3.047  | 0     |
| SERPINB8  | 3.928  | 2.8   |
| SERPINB9  | 5.264  | 31.05 |
| SERPINBP1 | 0.397  | 0     |
| SERPINC1  | 1.556  | 0.06  |
| SERPIND1  | 2.221  | 0     |
| SERPINE1  | 5.734  | 2.11  |
| SERPINE2  | 2.107  | 0.04  |
| SERPINF1  | 1.542  | 4.49  |
| SERPINF2  | 2.21   | 0.99  |
| SERPING1  | 2.005  | 2.71  |
| SERPINH1  | 2.204  | 2.24  |
| SERPINI1  | 1.895  | 0     |
| SERPINI2  | 1.43   | 0.55  |
| SERTAD1   | 1.165  | 7.72  |
| SERTAD2   | 5.547  | 15.7  |
| SERTAD3   | 1.676  | 2.6   |
| SERTAD4   | 2.028  | 0     |
| SESN1     | 3.724  | 72.98 |
| SESN2     | 3.485  | 0.97  |
| SESN3     | 4.591  | 14.07 |
| SESTD1    | 3.834  | 20.74 |
| SET       | 2.559  | 29.85 |
| SET07p    | 2.982  | 0     |
| SETBP1    | 5.744  | 1.29  |
| SETD1A    | 6.447  | 9.71  |
| SETD1B    | 8.531  | 12.5  |
| SETD2     | 7.987  | 19.01 |
| SETD3     | 3.3    | 4.47  |
| SETD4     | 6.424  | 2.44  |
| SETD5     | 15.941 | 22.51 |
| SETD6     | 1.998  | 0.6   |
| SETD7     | 8.583  | 14.4  |
| SETD8     | 2.751  | 3.06  |
| SETDB1    | 4.363  | 8.57  |
| SETDB2    | 3.298  | 2.61  |
| SETMAR    | 2.058  | 1.98  |
| SETP2     | 3.161  | 0.09  |
| SETX      | 8.56   | 10.16 |
| SEZ6      | 4.318  | 0.09  |
| SEZ6L     | 3.407  | 0     |
| SEZ6L2    | 3.358  | 0.18  |
| SF1       | 11.739 | 82.87 |
| SF3A1     | 5.391  | 17.67 |
| SF3A2     | 2.16   | 53.23 |
| SF3A3     | 2.841  | 18.6  |
| SF3A3P1   | 1.477  | 1.21  |

|         |        |        |
|---------|--------|--------|
| SF3A3P2 | 2.716  | 1.53   |
| SF3B1   | 5.161  | 166.89 |
| SF3B14  | 0.771  | 42.35  |
| SF3B2   | 2.894  | 47.9   |
| SF3B3   | 4.34   | 11.55  |
| SF3B4   | 1.549  | 39.73  |
| SF3B5   | 0.737  | 64.44  |
| SF4     | 2.075  | 8.58   |
| SF11    | 4.252  | 3.72   |
| SFMBT1  | 4.677  | 17.92  |
| SFMBT2  | 5.742  | 5.93   |
| SFN     | 1.315  | 0      |
| SFPQ    | 10.681 | 91.01  |
| SFPQP   | 2.847  | 1.56   |
| SFRP1   | 4.455  | 0      |
| SFRP2   | 1.99   | 0.05   |
| SFRP4   | 5.634  | 0      |
| SFRP5   | 1.887  | 0.05   |
| SFRS1   | 2.941  | 29.44  |
| SFRS10  | 5.484  | 45.01  |
| SFRS11  | 6.838  | 59.69  |
| SFRS12  | 4.77   | 32.07  |
| SFRS14  | 7.251  | 37.05  |
| SFRS15  | 4.682  | 13.59  |
| SFRS16  | 2.513  | 20.67  |
| SFRS2   | 2.882  | 78.03  |
| SFRS2B  | 2.178  | 13.36  |
| SFRS2IP | 5.5    | 17.55  |
| SFRS3   | 3.786  | 54.53  |
| SFRS4   | 4.714  | 66.91  |
| SFRS5   | 3.382  | 117.1  |
| SFRS6   | 5.046  | 63.94  |
| SFRS7   | 3.269  | 18.58  |
| SFRS8   | 3.706  | 20.74  |
| SFRS9   | 2.528  | 30.49  |
| SFT2D1  | 0.691  | 5.44   |
| SFT2D2  | 1.155  | 6.76   |
| SFT2D3  | 2.811  | 1.94   |
| SFTPA1  | 0.968  | 0      |
| SFTPA2  | 2.139  | 0      |
| SFTP B  | 3.535  | 0.08   |
| SFTPC   | 0.991  | 0      |
| SFTPD   | 1.283  | 0      |
| SFTPG   | 1.266  | 0      |
| SFXN1   | 6.951  | 102.58 |
| SFXN2   | 2.559  | 0.58   |
| SFXN3   | 3.09   | 4.74   |
| SFXN4   | 2.229  | 1.02   |
| SFXN5   | 4.14   | 8.32   |
| SGCA    | 1.404  | 0      |



|          |        |        |
|----------|--------|--------|
| SGCB     | 4.229  | 0.04   |
| SGCD     | 8.531  | 0.01   |
| SGCE     | 3.302  | 1.32   |
| SGCEP    | 1.641  | 0.18   |
| SGCG     | 1.624  | 0      |
| SGCZ     | 2.178  | 0.04   |
| SGEF     | 3.861  | 0      |
| SGIP1    | 4.554  | 0.02   |
| SGK      | 2.371  | 4.92   |
| SGK2     | 2.293  | 0.04   |
| SGK3     | 4.324  | 1.76   |
| SGOL1    | 2.722  | 0      |
| SGOL2    | 4.154  | 0.19   |
| SGPL1    | 4.692  | 6.05   |
| SGPP1    | 3.309  | 3.86   |
| SGPP2    | 1.2    | 0.58   |
| SGSH     | 2.682  | 11.03  |
| SGTA     | 2.315  | 29.11  |
| SGTB     | 2.649  | 2.84   |
| SH2B1    | 4.858  | 9.65   |
| SH2B2    | 3.971  | 0.75   |
| SH2B3    | 5.406  | 22.47  |
| SH2D1A   | 2.45   | 0.73   |
| SH2D1B   | 2.535  | 0.28   |
| SH2D2A   | 1.606  | 0.86   |
| SH2D3A   | 2.315  | 0.56   |
| SH2D3C   | 3.106  | 22.08  |
| SH2D4A   | 2.864  | 0.31   |
| SH2D4B   | 4.437  | 4.08   |
| SH2D5    | 6.101  | 0.06   |
| SH2D6    | 0.894  | 0      |
| SH3BGR   | 1.472  | 0      |
| SH3BGRL  | 1.743  | 22.14  |
| SH3BGRL2 | 4.646  | 0.02   |
| SH3BGRL3 | 0.884  | 143.37 |
| SH3BP1   | 2.576  | 1      |
| SH3BP2   | 7.3    | 16.45  |
| SH3BP4   | 5.183  | 0      |
| SH3BP5   | 4.46   | 30.24  |
| SH3BP5L  | 3.182  | 6.87   |
| SH3D19   | 5.373  | 1.29   |
| SH3GL1   | 2.9    | 22.45  |
| SH3GL2   | 2.487  | 0      |
| SH3GL3   | 2.012  | 0      |
| SH3GLB1  | 1.887  | 22.97  |
| SH3GLB2  | 1.984  | 12.61  |
| SH3GLP2  | 24.523 | 0.46   |
| SH3GLP3  | 27.17  | 0.17   |
| SH3KBP1  | 4.145  | 17.26  |
| SH3MD4   | 3.831  | 1.55   |

|          |        |       |
|----------|--------|-------|
| SH3PX3   | 3.233  | 0.61  |
| SH3PXD2A | 11.247 | 2.23  |
| SH3PXD2B | 7.777  | 0.56  |
| SH3RF1   | 5.265  | 6.09  |
| SH3RF2   | 3.003  | 0     |
| SH3TC1   | 9.93   | 73.7  |
| SH3TC2   | 26.58  | 0     |
| SH3YL1   | 1.965  | 1.51  |
| SHANK1   | 6.643  | 1.43  |
| SHANK2   | 10.174 | 0     |
| SHANK3   | 14.74  | 33.6  |
| SHARPIN  | 1.764  | 9.59  |
| SHB      | 2.302  | 1.2   |
| SHBG     | 1.209  | 0     |
| SHC1     | 3.677  | 12.33 |
| SHC2     | 2.494  | 0     |
| SHC3     | 2.394  | 0     |
| SHC4     | 4.556  | 0     |
| SHCBP1   | 3.206  | 1.88  |
| SHCL1    | 3.507  | 0.48  |
| SHD      | 1.515  | 0     |
| SHE      | 6.243  | 0     |
| SHF      | 2.239  | 0.18  |
| SHFM1    | 1.736  | 36.13 |
| SHFM3P1  | 2.39   | 22.94 |
| SHH      | 4.525  | 6.88  |
| SHKBP1   | 2.328  | 13.94 |
| SHMT1    | 5.066  | 11.76 |
| SHMT2    | 2.095  | 15.92 |
| SHOC2    | 3.8    | 16.27 |
| SHOX     | 4.384  | 0     |
| SHOX2    | 3.753  | 0     |
| SHPRH    | 6.994  | 0.74  |
| SHQ1     | 2.848  | 0.38  |
| SHROOM1  | 3.19   | 0     |
| SHROOM2  | 7.445  | 0     |
| SHROOM3  | 7.556  | 0     |
| SHROOM4  | 6.003  | 0     |
| SI       | 6.01   | 0     |
| SIAE     | 2.839  | 0.24  |
| SIAH1    | 4.39   | 13.72 |
| SIAH2    | 2.62   | 30.93 |
| SIAHBP1  | 1.887  | 11.38 |
| SIDT1    | 4.792  | 7.7   |
| SIDT2    | 3.919  | 10.18 |
| SIGIRR   | 1.854  | 14.3  |
| SIGLEC1  | 6.72   | 0.16  |
| SIGLEC10 | 2.998  | 0.04  |
| SIGLEC11 | 3.165  | 0     |
| SIGLEC12 | 2.6    | 0     |

|           |       |       |
|-----------|-------|-------|
| SIGLEC5   | 2.089 | 0.85  |
| SIGLEC6   | 2.404 | 0     |
| SIGLEC7   | 2.244 | 0     |
| SIGLEC8   | 2.949 | 0.07  |
| SIGLEC9   | 1.69  | 0.18  |
| SIGLECP1  | 0.507 | 0     |
| SIGLECP10 | 0.478 | 0     |
| SIGLECP11 | 0.426 | 0     |
| SIGLECP12 | 0.762 | 0     |
| SIGLECP13 | 0.479 | 0     |
| SIGLECP14 | 0.428 | 0     |
| SIGLECP15 | 0.538 | 0     |
| SIGLECP16 | 7.774 | 0.02  |
| SIGLECP2  | 0.451 | 0     |
| SIGLECP3  | 8.285 | 0.01  |
| SIGLECP4  | 0.426 | 0     |
| SIGLECP5  | 0.466 | 0     |
| SIGLECP6  | 0.48  | 0     |
| SIGLECP7  | 0.699 | 0     |
| SIGLECP8  | 0.354 | 0     |
| SIGLECP9  | 0.475 | 0     |
| SIKE      | 2.19  | 2.8   |
| SIL1      | 1.989 | 5.57  |
| SILV      | 2.126 | 0.65  |
| SIM1      | 3.995 | 0     |
| SIM2      | 5.482 | 0     |
| SIN3A     | 5.126 | 11.76 |
| SIN3B     | 5.432 | 11.33 |
| SIP1      | 1.893 | 0.89  |
| SIPA1     | 3.778 | 21.47 |
| SIPA1L1   | 6.007 | 2.93  |
| SIPA1L2   | 5.679 | 5.37  |
| SIPA1L3   | 7.984 | 4.04  |
| SIRPA     | 4.487 | 3.66  |
| SIRPB1    | 3.815 | 0.54  |
| SIRPB2    | 3.004 | 0.04  |
| SIRPD     | 0.812 | 0     |
| SIRPG     | 1.716 | 0.34  |
| SIRT1     | 4.09  | 5.88  |
| SIRT2     | 2.815 | 6.19  |
| SIRT3     | 3.26  | 5.68  |
| SIRT4     | 1.171 | 0     |
| SIRT5     | 2.941 | 0.87  |
| SIRT6     | 1.636 | 2.18  |
| SIRT7     | 1.713 | 8.2   |
| SIT1      | 1.238 | 0.48  |
| SIVA1     | 1.865 | 17.51 |
| SIX1      | 1.376 | 0     |
| SIX2      | 2.115 | 0     |
| SIX3      | 1.924 | 0     |

|         |       |       |
|---------|-------|-------|
| SIX4    | 6.214 | 0     |
| SIX5    | 3.145 | 0.1   |
| SIX6    | 1.391 | 0     |
| SKAP1   | 1.531 | 0.45  |
| SKAP2   | 7.943 | 0.35  |
| SKI     | 6.888 | 35.87 |
| SKIL    | 3.059 | 5.11  |
| SKIP    | 6.802 | 0     |
| SKIV2L  | 12.51 | 0     |
| SKIV2L2 | 3.56  | 6.28  |
| SKP1A   | 3.204 | 13.93 |
| SKP2    | 1.8   | 3.02  |
| SLA     | 2.667 | 5.72  |
| SLA/LP  | 3.363 | 4.27  |
| SLA2    | 4.046 | 1.24  |
| SLAIN1  | 2.598 | 4.45  |
| SLAIN2  | 6.472 | 2.17  |
| SLAMF1  | 1.791 | 0.5   |
| SLAMF6  | 2.733 | 0.68  |
| SLAMF7  | 2.657 | 0.82  |
| SLAMF8  | 3.178 | 0.75  |
| SLAMF9  | 1.12  | 0.18  |
| SLBP    | 1.888 | 41.92 |
| SLC10A1 | 1.579 | 0.25  |
| SLC10A2 | 3.777 | 0.08  |
| SLC10A3 | 2.124 | 2.6   |
| SLC10A4 | 1.652 | 0     |
| SLC10A5 | 1.317 | 0     |
| SLC10A6 | 1.134 | 0.09  |
| SLC10A7 | 4.103 | 0.89  |
| SLC11A1 | 2.567 | 2.54  |
| SLC11A2 | 4.105 | 7.52  |
| SLC12A1 | 3.362 | 0     |
| SLC12A2 | 6.86  | 0.52  |
| SLC12A3 | 3.131 | 0     |
| SLC12A4 | 3.84  | 1.37  |
| SLC12A5 | 6.042 | 0.05  |
| SLC12A6 | 4.882 | 23.61 |
| SLC12A7 | 5.231 | 9.06  |
| SLC12A8 | 3.482 | 0.05  |
| SLC12A9 | 6.586 | 9.21  |
| SLC13A1 | 7.593 | 0     |
| SLC13A2 | 1.946 | 0     |
| SLC13A3 | 4.481 | 0     |
| SLC13A4 | 5.792 | 0.26  |
| SLC13A5 | 3.207 | 0     |
| SLC14A1 | 2.72  | 0     |
| SLC14A2 | 4.167 | 0     |
| SLC15A1 | 3.105 | 0     |
| SLC15A2 | 2.831 | 0.94  |

|            |        |       |
|------------|--------|-------|
| SLC15A3    | 2.113  | 4.96  |
| SLC15A4    | 2.768  | 2.25  |
| SLC16A1    | 3.355  | 2.19  |
| SLC16A10   | 2.471  | 0.04  |
| SLC16A11   | 1.803  | 0.71  |
| SLC16A12   | 3.9    | 0     |
| SLC16A13   | 1.281  | 0.23  |
| SLC16A14   | 4.294  | 4.95  |
| SLC16A2    | 4.37   | 8.67  |
| SLC16A3    | 3.625  | 46.75 |
| SLC16A4    | 2.529  | 0.28  |
| SLC16A5    | 1.929  | 1.28  |
| SLC16A6    | 2.659  | 0.44  |
| SLC16A7    | 3.541  | 0.08  |
| SLC16A8    | 2.073  | 5.78  |
| SLC16A9    | 3.646  | 0     |
| SLC17A1    | 1.548  | 0     |
| SLC17A2    | 2.27   | 0     |
| SLC17A3    | 1.75   | 0     |
| SLC17A4    | 2.598  | 0     |
| SLC17A5    | 3.273  | 1.15  |
| SLC17A6    | 3.919  | 0     |
| SLC17A7    | 2.949  | 0.07  |
| SLC17A8    | 3.846  | 0     |
| SLC18A1    | 2.747  | 0     |
| SLC18A2    | 1.894  | 0.21  |
| SLC18A3    | 2.419  | 0     |
| SLC19A1    | 4.332  | 2.12  |
| SLC19A2    | 3.651  | 0.3   |
| SLC19A3    | 3.767  | 0     |
| SLC1A1     | 3.722  | 0     |
| SLC1A2     | 11.696 | 0     |
| SLC1A3     | 3.936  | 0.25  |
| SLC1A4     | 4.502  | 4.66  |
| SLC1A5     | 2.844  | 2.4   |
| SLC1A6     | 1.719  | 0     |
| SLC1A7     | 2.637  | 0.12  |
| SLC20A1    | 3.48   | 19.47 |
| SLC20A2    | 3.909  | 2.38  |
| SLC22A1    | 2.109  | 0     |
| SLC22A10   | 2.187  | 0     |
| SLC22A11   | 2.512  | 0.04  |
| SLC22A12   | 4.413  | 0     |
| SLC22A13   | 2.527  | 0     |
| SLC22A14   | 2.201  | 0.04  |
| SLC22A15   | 4.07   | 0.24  |
| SLC22A16   | 1.971  | 2.26  |
| SLC22A17   | 3.002  | 0.04  |
| SLC22A18   | 1.613  | 2.82  |
| SLC22A18AS | 1.341  | 0     |

|           |       |       |
|-----------|-------|-------|
| SLC22A2   | 4.746 | 0     |
| SLC22A3   | 5.624 | 0     |
| SLC22A4   | 2.192 | 0.59  |
| SLC22A5   | 3.237 | 0.46  |
| SLC22A6   | 2.889 | 0     |
| SLC22A7   | 2.559 | 0     |
| SLC22A8   | 2.178 | 0     |
| SLC22A9   | 2.327 | 0     |
| SLC23A1   | 2.388 | 6.21  |
| SLC23A2   | 7.056 | 6.82  |
| SLC23A3   | 1.935 | 0.2   |
| SLC24A1   | 5.377 | 2.22  |
| SLC24A2   | 2.221 | 0     |
| SLC24A3   | 3.889 | 0     |
| SLC24A4   | 4.718 | 0     |
| SLC24A5   | 1.617 | 0     |
| SLC24A6   | 3.684 | 17.06 |
| SLC25A1   | 1.583 | 8.5   |
| SLC25A10  | 1.885 | 2.1   |
| SLC25A11  | 1.49  | 4.65  |
| SLC25A12  | 2.95  | 2.82  |
| SLC25A13  | 6.272 | 1.19  |
| SLC25A14  | 1.914 | 29.05 |
| SLC25A15  | 1.621 | 0.3   |
| SLC25A16  | 2.543 | 3.65  |
| SLC25A17  | 2.266 | 0.61  |
| SLC25A18  | 2.087 | 0.04  |
| SLC25A19  | 1.651 | 0.3   |
| SLC25A2   | 1.417 | 0.21  |
| SLC25A20  | 1.787 | 1     |
| SLC25A20P | 1.716 | 0.05  |
| SLC25A21  | 1.995 | 0     |
| SLC25A22  | 2.754 | 1.9   |
| SLC25A23  | 3.46  | 0.11  |
| SLC25A24  | 3.83  | 1.94  |
| SLC25A25  | 4.162 | 18.33 |
| SLC25A26  | 2.617 | 5.97  |
| SLC25A27  | 2.007 | 0.74  |
| SLC25A28  | 2.516 | 39.84 |
| SLC25A29  | 4.221 | 17.79 |
| SLC25A3   | 5.621 | 68.35 |
| SLC25A30  | 1.975 | 12.92 |
| SLC25A31  | 1.793 | 0     |
| SLC25A32  | 3.069 | 9.06  |
| SLC25A33  | 1.461 | 1.28  |
| SLC25A34  | 3.07  | 0.68  |
| SLC25A35  | 2.785 | 3.59  |
| SLC25A36  | 4.169 | 19.79 |
| SLC25A37  | 2.71  | 13.25 |
| SLC25A38  | 2.003 | 8.79  |

|           |       |        |
|-----------|-------|--------|
| SLC25A39  | 1.55  | 29.81  |
| SLC25A4   | 1.326 | 0.15   |
| SLC25A40  | 3.03  | 0.62   |
| SLC25A41  | 1.63  | 0      |
| SLC25A42  | 3.117 | 4.07   |
| SLC25A43  | 2.776 | 0.85   |
| SLC25A44  | 3.463 | 9.65   |
| SLC25A45  | 2.432 | 2.48   |
| SLC25A46  | 2.326 | 3.02   |
| SLC25A5   | 1.225 | 132.78 |
| SLC25A6   | 1.439 | 611.43 |
| SLC25A6P1 | 0.725 | 0      |
| SLC26A1   | 4.187 | 1.18   |
| SLC26A10  | 3.04  | 0      |
| SLC26A11  | 2.872 | 0.55   |
| SLC26A2   | 7.36  | 1.6    |
| SLC26A3   | 5.709 | 0.04   |
| SLC26A4   | 9.857 | 0.03   |
| SLC26A5   | 6.108 | 0.12   |
| SLC26A6   | 3.514 | 1.21   |
| SLC26A7   | 5.764 | 0      |
| SLC26A8   | 3.94  | 0.03   |
| SLC26A9   | 6.979 | 0.07   |
| SLC27A1   | 3.547 | 3.8    |
| SLC27A2   | 2.343 | 0.46   |
| SLC27A3   | 2.413 | 8.32   |
| SLC27A4   | 2.948 | 0.51   |
| SLC27A5   | 2.277 | 0.65   |
| SLC27A6   | 3.234 | 0      |
| SLC28A1   | 3.41  | 0      |
| SLC28A2   | 2.458 | 0      |
| SLC28A3   | 2.209 | 0      |
| SLC29A1   | 2.162 | 0.51   |
| SLC29A2   | 2.515 | 1.96   |
| SLC29A3   | 2.24  | 1.9    |
| SLC29A4   | 5.72  | 0.14   |
| SLC2A1    | 2.855 | 27.59  |
| SLC2A10   | 4.236 | 0.03   |
| SLC2A11   | 2.314 | 1.96   |
| SLC2A12   | 5.599 | 0.05   |
| SLC2A13   | 7.003 | 0.03   |
| SLC2A14   | 2.195 | 0.72   |
| SLC2A2    | 3.439 | 0      |
| SLC2A3    | 3.914 | 26.52  |
| SLC2A3P2  | 2.704 | 0.81   |
| SLC2A4    | 3.149 | 0.04   |
| SLC2A4RG  | 2.279 | 5.47   |
| SLC2A5    | 2.322 | 468.22 |
| SLC2A6    | 2.487 | 0.48   |
| SLC2A7    | 1.575 | 0.94   |

|          |        |       |
|----------|--------|-------|
| SLC2A8   | 2.118  | 0.19  |
| SLC2A9   | 2.079  | 1.72  |
| SLC30A1  | 2.018  | 2.36  |
| SLC30A10 | 4.655  | 0     |
| SLC30A2  | 2.473  | 0     |
| SLC30A3  | 2.093  | 0     |
| SLC30A4  | 4.287  | 0.35  |
| SLC30A5  | 3.979  | 1.61  |
| SLC30A6  | 2.45   | 1.05  |
| SLC30A7  | 5.867  | 2.35  |
| SLC30A8  | 5.373  | 0     |
| SLC30A9  | 3.261  | 2.61  |
| SLC31A1  | 4.718  | 6.61  |
| SLC31A2  | 1.693  | 34.95 |
| SLC32A1  | 2.574  | 0.04  |
| SLC33A1  | 2.835  | 4.05  |
| SLC34A1  | 2.563  | 0     |
| SLC34A2  | 2.25   | 0     |
| SLC34A3  | 2.124  | 0.19  |
| SLC35A1  | 1.844  | 2.58  |
| SLC35A2  | 2.751  | 5     |
| SLC35A3  | 2.348  | 3.83  |
| SLC35A4  | 2.657  | 9.61  |
| SLC35A5  | 2.94   | 1.85  |
| SLC35B1  | 1.186  | 18.77 |
| SLC35B2  | 2.024  | 6.79  |
| SLC35B3  | 2.04   | 1.6   |
| SLC35B4  | 13.59  | 0.83  |
| SLC35C1  | 2.793  | 1.7   |
| SLC35C2  | 2.824  | 4.98  |
| SLC35D1  | 1.936  | 7.21  |
| SLC35D2  | 1.571  | 13.73 |
| SLC35D3  | 2.359  | 0     |
| SLC35E1  | 3.483  | 6.73  |
| SLC35E2  | 1.43   | 3.94  |
| SLC35E3  | 2.347  | 9.27  |
| SLC35E4  | 1.266  | 0.08  |
| SLC35F1  | 4.844  | 0     |
| SLC35F2  | 2.91   | 0.82  |
| SLC35F3  | 2.891  | 0     |
| SLC35F4  | 1.779  | 0.12  |
| SLC35F5  | 2.855  | 1     |
| SLC36A1  | 5.773  | 0.13  |
| SLC36A2  | 3.389  | 0     |
| SLC36A3  | 2.456  | 0.04  |
| SLC36A4  | 2.465  | 1.61  |
| SLC37A1  | 3.863  | 9.27  |
| SLC37A2  | 2.696  | 0     |
| SLC37A3  | 10.129 | 2.9   |
| SLC37A4  | 2.52   | 1.69  |



|          |       |       |
|----------|-------|-------|
| SLC38A1  | 9.186 | 51.15 |
| SLC38A2  | 5.363 | 43.58 |
| SLC38A3  | 2.437 | 0     |
| SLC38A4  | 3.942 | 0     |
| SLC38A5  | 2.655 | 2.53  |
| SLC38A6  | 1.516 | 0.45  |
| SLC39A1  | 2.427 | 7.05  |
| SLC39A10 | 5.227 | 2.5   |
| SLC39A11 | 2.737 | 1.33  |
| SLC39A12 | 2.635 | 0.04  |
| SLC39A13 | 2.289 | 25.85 |
| SLC39A14 | 4.611 | 0.26  |
| SLC39A2  | 1.358 | 0     |
| SLC39A3  | 4.158 | 2.31  |
| SLC39A4  | 3.124 | 0.63  |
| SLC39A5  | 2.85  | 4.65  |
| SLC39A6  | 2.733 | 1.56  |
| SLC39A7  | 7.077 | 0     |
| SLC39A8  | 3.292 | 4.84  |
| SLC39A9  | 3.396 | 5.39  |
| SLC3A1   | 2.3   | 0.04  |
| SLC3A2   | 3.127 | 14.3  |
| SLC40A1  | 3.431 | 0.2   |
| SLC41A1  | 4.854 | 15.02 |
| SLC41A2  | 2.418 | 0.08  |
| SLC41A3  | 3.087 | 13.97 |
| SLC43A1  | 2.498 | 2.5   |
| SLC43A2  | 3.001 | 8.97  |
| SLC43A3  | 2.822 | 6.69  |
| SLC44A1  | 4.298 | 8.98  |
| SLC44A2  | 3.89  | 52.49 |
| SLC44A3  | 2.061 | 0.04  |
| SLC44A4  | 8.967 | 0     |
| SLC44A5  | 2.288 | 0.13  |
| SLC45A1  | 2.401 | 0     |
| SLC45A2  | 3.226 | 0     |
| SLC45A3  | 3.382 | 1.81  |
| SLC45A4  | 8.831 | 0.2   |
| SLC4A1   | 3.636 | 1.44  |
| SLC4A10  | 3.931 | 0     |
| SLC4A11  | 3.274 | 1.64  |
| SLC4A1AP | 2.954 | 2.31  |
| SLC4A2   | 8.112 | 2.63  |
| SLC4A3   | 4.685 | 0     |
| SLC4A4   | 7.588 | 0.01  |
| SLC4A5   | 4.034 | 0.88  |
| SLC4A7   | 7.757 | 1.21  |
| SLC4A8   | 6.107 | 0.04  |
| SLC4A9   | 3.086 | 0     |
| SLC5A1   | 2.45  | 0.04  |

|          |        |       |
|----------|--------|-------|
| SLC5A10  | 2.201  | 0.22  |
| SLC5A11  | 2.35   | 0.21  |
| SLC5A12  | 2.269  | 0     |
| SLC5A2   | 2.271  | 2.04  |
| SLC5A3   | 2.157  | 1.88  |
| SLC5A4   | 2.02   | 0     |
| SLC5A5   | 2.49   | 0     |
| SLC5A6   | 3.145  | 3.11  |
| SLC5A7   | 5.146  | 0     |
| SLC5A8   | 3.982  | 0     |
| SLC5A9   | 3.227  | 0     |
| SLC6A1   | 4.46   | 0     |
| SLC6A10P | 11.506 | 0     |
| SLC6A11  | 1.991  | 0     |
| SLC6A12  | 3.372  | 0     |
| SLC6A13  | 2.185  | 0     |
| SLC6A14  | 4.519  | 0     |
| SLC6A15  | 7.991  | 0     |
| SLC6A16  | 2.936  | 0.2   |
| SLC6A17  | 6.42   | 0     |
| SLC6A18  | 2.12   | 0     |
| SLC6A19  | 1.905  | 0.16  |
| SLC6A2   | 3.347  | 0     |
| SLC6A20  | 5.358  | 0.15  |
| SLC6A3   | 3.932  | 0     |
| SLC6A4   | 2.756  | 0.04  |
| SLC6A5   | 2.716  | 0     |
| SLC6A6   | 5.871  | 13.7  |
| SLC6A6P  | 1.803  | 0.17  |
| SLC6A7   | 3.739  | 0.05  |
| SLC6A8   | 3.917  | 0.27  |
| SLC6A9   | 3.647  | 0.16  |
| SLC7A1   | 7.239  | 1.85  |
| SLC7A10  | 1.897  | 0.05  |
| SLC7A11  | 9.648  | 0.01  |
| SLC7A13  | 1.865  | 0     |
| SLC7A14  | 2.909  | 0     |
| SLC7A2   | 7.633  | 0     |
| SLC7A3   | 2.223  | 0     |
| SLC7A4   | 2.311  | 0     |
| SLC7A5   | 4.543  | 78.56 |
| SLC7A6   | 6.25   | 8.61  |
| SLC7A6OS | 1.607  | 6.22  |
| SLC7A7   | 2.447  | 1.46  |
| SLC7A8   | 4.485  | 0     |
| SLC7A9   | 1.76   | 0     |
| SLC8A1   | 3.194  | 0.65  |
| SLC8A2   | 4.282  | 0.03  |
| SLC8A3   | 5.853  | 0.02  |
| SLC9A1   | 4.517  | 1.99  |

|          |       |       |
|----------|-------|-------|
| SLC9A10  | 4.123 | 0     |
| SLC9A11  | 4.367 | 0.18  |
| SLC9A2   | 5.442 | 0     |
| SLC9A3   | 3.538 | 5.34  |
| SLC9A3P2 | 1.894 | 0     |
| SLC9A3R1 | 1.984 | 10.83 |
| SLC9A3R2 | 1.557 | 9.15  |
| SLC9A4   | 4.134 | 0     |
| SLC9A5   | 3.726 | 0.4   |
| SLC9A6   | 4.454 | 4.53  |
| SLC9A7   | 2.869 | 5.28  |
| SLC9A8   | 6.255 | 5.72  |
| SLC9A9   | 3.543 | 1.9   |
| SLCO1A2  | 4.427 | 0     |
| SLCO1B1  | 2.779 | 0     |
| SLCO1B3  | 2.631 | 0     |
| SLCO1C1  | 3.365 | 0     |
| SLCO2A1  | 4.031 | 0.07  |
| SLCO2B1  | 4.068 | 4.69  |
| SLCO3A1  | 2.74  | 0.36  |
| SLCO4A1  | 2.776 | 1.39  |
| SLCO4C1  | 5.334 | 0.28  |
| SLCO5A1  | 3.692 | 0.13  |
| SLCO6A1  | 2.524 | 0     |
| SLFN11   | 4.896 | 3.19  |
| SLFN12   | 2.383 | 0.58  |
| SLFN13   | 8.385 | 3.53  |
| SLFN14   | 2.739 | 0.68  |
| SLFN5    | 2.836 | 0.67  |
| SLFNL1   | 1.953 | 0.71  |
| SLIC1    | 1.68  | 8.01  |
| SLIT1    | 5.095 | 0     |
| SLIT2    | 4.95  | 0     |
| SLIT3    | 5.015 | 0     |
| SLITRK1  | 5.186 | 0     |
| SLITRK2  | 5.009 | 0     |
| SLITRK3  | 4.222 | 0     |
| SLITRK4  | 3.383 | 0     |
| SLITRK5  | 4.447 | 0     |
| SLITRK6  | 4.181 | 0     |
| SLK      | 5.606 | 6.62  |
| SLMAP    | 4.42  | 5.08  |
| SLMO1    | 1.682 | 0.12  |
| SLMO2    | 2.527 | 15.58 |
| SLN      | 0.717 | 0     |
| SLPI     | 0.598 | 1     |
| SLTM     | 5.744 | 11.85 |
| SLU7     | 2.24  | 31.8  |
| SLURP1   | 0.537 | 0     |
| SMA4     | 2.362 | 0     |

|          |        |       |
|----------|--------|-------|
| SMA5     | 3.523  | 0     |
| SMAD1    | 3.12   | 14.62 |
| SMAD2    | 5.466  | 5.64  |
| SMAD3    | 7.743  | 33.38 |
| SMAD4    | 4.805  | 17.44 |
| SMAD5    | 7.095  | 2.76  |
| SMAD6    | 2.907  | 0.1   |
| SMAD7    | 3.087  | 7.31  |
| SMAD9    | 1.925  | 0.05  |
| SMAF1    | 0.77   | 0     |
| SMAP1    | 3.129  | 5.85  |
| SMAP1L   | 9.55   | 100.3 |
| SMARCA1  | 4.285  | 0     |
| SMARCA2  | 9.544  | 85.9  |
| SMARCA4  | 8.166  | 44.38 |
| SMARCA5  | 4.141  | 15.14 |
| SMARCAD1 | 4.916  | 2.98  |
| SMARCAL1 | 3.04   | 0.82  |
| SMARCB1  | 1.815  | 25.02 |
| SMARCC1  | 5.749  | 10.44 |
| SMARCC2  | 5.041  | 16.13 |
| SMARCD1  | 3.331  | 18.44 |
| SMARCD2  | 2.704  | 31.65 |
| SMARCD3  | 3.84   | 0.49  |
| SMARCE1  | 2.425  | 36.63 |
| SMC1A    | 9.725  | 2.8   |
| SMC1B    | 4.253  | 0     |
| SMC2     | 4.149  | 0.84  |
| SMC3     | 4.112  | 9.96  |
| SMC4     | 7.67   | 24.74 |
| SMC5     | 3.492  | 4.65  |
| SMC6     | 5.134  | 17.9  |
| SMCHD1   | 9.796  | 29.17 |
| SMCP     | 0.77   | 0     |
| SMCR7    | 3.639  | 0.54  |
| SMCR7L   | 5.699  | 4.28  |
| SMCR8    | 4.839  | 13    |
| SMCYP    | 0.875  | 0     |
| SMEK1    | 4.779  | 28.49 |
| SMEK2    | 4.496  | 11.64 |
| SMEK3P   | 3.133  | 0     |
| SMG1     | 15.725 | 5.12  |
| SMG5     | 4.563  | 18.9  |
| SMG6     | 5.913  | 5.44  |
| SMG7     | 6.728  | 10.6  |
| SMN1     | 3.246  | 0.15  |
| SMN2     | 4.398  | 0.09  |
| SMNDC1   | 2.45   | 13.12 |
| SMNP     | 0.832  | 1.66  |
| SMO      | 7.476  | 0.6   |

|         |        |       |
|---------|--------|-------|
| SMOC1   | 3.683  | 0     |
| SMOC2   | 2.947  | 0     |
| SMOX    | 2.875  | 7.39  |
| SMPD1   | 3.272  | 1.9   |
| SMPD2   | 1.68   | 5.77  |
| SMPD3   | 5.264  | 0.92  |
| SMPD4   | 5.244  | 9.64  |
| SMPDL3A | 1.742  | 0.45  |
| SMPDL3B | 2.405  | 0.08  |
| SMPX    | 0.886  | 0     |
| SMR3A   | 0.598  | 0     |
| SMR3B   | 0.785  | 0     |
| SMS     | 1.688  | 6.62  |
| SMTN    | 3.671  | 0.73  |
| SMTNL1  | 2.062  | 0.76  |
| SMTNL2  | 1.919  | 0.31  |
| SMU1    | 1.702  | 10.81 |
| SMUG1   | 1.57   | 0.69  |
| SMURF1  | 13.471 | 14.89 |
| SMURF2  | 3.866  | 5.99  |
| SMYD1   | 4.347  | 0     |
| SMYD2   | 1.671  | 3.67  |
| SMYD3   | 1.458  | 4.28  |
| SMYD4   | 4.229  | 1.69  |
| SMYD5   | 2.543  | 3.96  |
| SNAG1   | 2.146  | 6.27  |
| SNAI1   | 1.695  | 11.27 |
| SNAI1L1 | 1.666  | 0.12  |
| SNAI2   | 2.101  | 0.66  |
| SNAI3   | 1.629  | 0.54  |
| SNAP23  | 2.307  | 13.59 |
| SNAP23P | 0.246  | 0.8   |
| SNAP25  | 2.171  | 0     |
| SNAP29  | 2.869  | 2.73  |
| SNAP91  | 4.369  | 0.07  |
| SNAPAP  | 0.96   | 9.28  |
| SNAPC1  | 2.564  | 1.27  |
| SNAPC2  | 1.513  | 2.29  |
| SNAPC3  | 3.095  | 1.08  |
| SNAPC4  | 4.65   | 2.83  |
| SNAPC5  | 0.785  | 7.56  |
| SNCA    | 2.3    | 1.21  |
| SNCAIP  | 3.569  | 0     |
| SNCB    | 1.45   | 0     |
| SNCG    | 0.697  | 0     |
| SND1    | 7.016  | 18.4  |
| SNED1   | 6.834  | 1.16  |
| SNF1LK  | 4.712  | 23.37 |
| SNF1LK2 | 5.681  | 2     |
| SNF8    | 1.214  | 19.23 |

|          |       |        |
|----------|-------|--------|
| SNFT     | 0.98  | 0.81   |
| SNHG5    | 0.937 | 100.41 |
| SNHG6    | 0.472 | 155.11 |
| SNHG8    | 0.874 | 2.27   |
| SNIP     | 4.114 | 0      |
| SNIP1    | 2.471 | 14.93  |
| SNN      | 3.274 | 21.3   |
| SNORA1   | 0.13  | 3.05   |
| SNORA10  | 0.133 | 4.47   |
| SNORA11  | 0.131 | 1.51   |
| SNORA12  | 0.147 | 4.04   |
| SNORA13  | 0.133 | 0.75   |
| SNORA14A | 0.268 | 0      |
| SNORA14B | 0.135 | 0      |
| SNORA15  | 0.266 | 0      |
| SNORA16A | 0.404 | 8.33   |
| SNORA17  | 0.385 | 45.22  |
| SNORA18  | 0.132 | 5.24   |
| SNORA19  | 0.128 | 0.77   |
| SNORA20  | 0.132 | 4.5    |
| SNORA21  | 0.133 | 17.86  |
| SNORA22  | 0.268 | 1.85   |
| SNORA23  | 0.189 | 0.52   |
| SNORA24  | 0.734 | 96.92  |
| SNORA26  | 0.263 | 16.18  |
| SNORA27  | 0.126 | 3.14   |
| SNORA28  | 0.126 | 1.57   |
| SNORA29  | 0.14  | 2.12   |
| SNORA2A  | 0.135 | 1.47   |
| SNORA2B  | 0.137 | 0      |
| SNORA3   | 0.13  | 3.8    |
| SNORA30  | 0.129 | 0      |
| SNORA31  | 0.13  | 6.09   |
| SNORA33  | 0.133 | 10.42  |
| SNORA34  | 0.137 | 0      |
| SNORA35  | 0.128 | 0      |
| SNORA36A | 0.132 | 3.75   |
| SNORA37  | 0.129 | 0      |
| SNORA38  | 0.396 | 0      |
| SNORA4   | 0.137 | 28.89  |
| SNORA40  | 0.127 | 4.68   |
| SNORA41  | 0.132 | 3      |
| SNORA42  | 0.134 | 0      |
| SNORA43  | 1.361 | 30.89  |
| SNORA44  | 0.132 | 4.5    |
| SNORA45  | 0.131 | 3.78   |
| SNORA46  | 0.135 | 0      |
| SNORA47  | 0.138 | 0.72   |
| SNORA48  | 0.135 | 14.66  |
| SNORA49  | 0.137 | 0      |

|           |       |       |
|-----------|-------|-------|
| SNORA50   | 0.136 | 0     |
| SNORA51   | 0.132 | 2.25  |
| SNORA52   | 0.134 | 8.86  |
| SNORA53   | 0.25  | 4.36  |
| SNORA54   | 0.123 | 0     |
| SNORA55   | 0.137 | 0     |
| SNORA56   | 0.129 | 4.6   |
| SNORA58   | 0.137 | 0     |
| SNORA59B  | 0.152 | 1.95  |
| SNORA5A   | 0.268 | 0.37  |
| SNORA5B   | 0.264 | 0.37  |
| SNORA5C   | 0.274 | 0.36  |
| SNORA6    | 0.149 | 5.32  |
| SNORA60   | 0.136 | 2.19  |
| SNORA61   | 0.13  | 9.89  |
| SNORA62   | 0.154 | 10.92 |
| SNORA63   | 0.135 | 28.59 |
| SNORA64   | 0.134 | 6.65  |
| SNORA65   | 0.136 | 0     |
| SNORA66   | 0.133 | 2.98  |
| SNORA67   | 0.137 | 26.72 |
| SNORA68   | 0.133 | 2.97  |
| SNORA69   | 0.132 | 0.75  |
| SNORA70   | 0.135 | 19.79 |
| SNORA71A  | 0.138 | 1.43  |
| SNORA71B  | 0.676 | 11.12 |
| SNORA71C  | 0.138 | 2.15  |
| SNORA71D  | 0.138 | 0     |
| SNORA72   | 0.132 | 1.5   |
| SNORA73A  | 0.207 | 4.3   |
| SNORA74A  | 0.2   | 0.99  |
| SNORA74B  | 0.204 | 0.97  |
| SNORA75   | 0.137 | 5.06  |
| SNORA76   | 0.469 | 38.18 |
| SNORA77   | 0.125 | 5.54  |
| SNORA78   | 0.127 | 3.89  |
| SNORA79   | 0.14  | 0     |
| SNORA7B   | 0.139 | 0     |
| SNORA8    | 0.139 | 17.08 |
| SNORA80   | 0.136 | 0     |
| SNORA81   | 0.178 | 10.01 |
| SNORA9    | 0.266 | 2.6   |
| SNORD10   | 0.148 | 12.03 |
| SNORD100  | 0.1   | 0     |
| SNORD101  | 0.1   | 1.98  |
| SNORD102  | 0.1   | 4.95  |
| SNORD107  | 0.1   | 0     |
| SNORD108  | 0.1   | 0     |
| SNORD109A | 0.1   | 0     |
| SNORD109B | 0.1   | 0     |

|             |       |        |
|-------------|-------|--------|
| SNORD11     | 0.1   | 7.92   |
| SNORD115@   | 0.1   | 0      |
| SNORD115-1  | 0.1   | 0      |
| SNORD116@   | 0.1   | 0      |
| SNORD116-19 | 0.1   | 0      |
| SNORD12     | 1.096 | 81.51  |
| SNORD13     | 0.104 | 1.9    |
| SNORD14A    | 0.1   | 7.92   |
| SNORD14B    | 0.1   | 8.91   |
| SNORD15A    | 0.148 | 2.68   |
| SNORD15B    | 0.146 | 1.35   |
| SNORD16     | 0.1   | 2.97   |
| SNORD18A    | 0.1   | 0.99   |
| SNORD18B    | 0.1   | 0      |
| SNORD18C    | 0.1   | 3.96   |
| SNORD2      | 0.1   | 2.97   |
| SNORD20     | 0.1   | 12.86  |
| SNORD21     | 0.1   | 2.97   |
| SNORD22     | 0.785 | 126.41 |
| SNORD25     | 0.249 | 19.47  |
| SNORD26     | 0.1   | 8.91   |
| SNORD27     | 0.216 | 23.82  |
| SNORD28     | 0.519 | 14.49  |
| SNORD29     | 0.226 | 15.76  |
| SNORD30     | 0.1   | 13.85  |
| SNORD31     | 0.614 | 22.24  |
| SNORD32A    | 0.1   | 28.69  |
| SNORD33     | 0.1   | 0.99   |
| SNORD34     | 0.1   | 13.85  |
| SNORD35A    | 0.1   | 18.8   |
| SNORD35B    | 0.1   | 28.69  |
| SNORD37     | 0.1   | 0      |
| SNORD38A    | 0.1   | 9.89   |
| SNORD38B    | 0.1   | 0.99   |
| SNORD41     | 0.1   | 0      |
| SNORD42A    | 0.1   | 1.98   |
| SNORD42B    | 0.1   | 0.99   |
| SNORD43     | 0.1   | 0      |
| SNORD44     | 0.1   | 0.99   |
| SNORD45A    | 0.1   | 1.98   |
| SNORD45B    | 0.1   | 5.94   |
| SNORD46     | 0.1   | 0.99   |
| SNORD47     | 0.1   | 0.99   |
| SNORD48     | 0.19  | 0      |
| SNORD49A    | 0.1   | 1.98   |
| SNORD49B    | 0.1   | 58.38  |
| SNORD4A     | 0.1   | 7.92   |
| SNORD4B     | 0.1   | 1.98   |
| SNORD5      | 0.1   | 4.95   |
| SNORD50A    | 0.1   | 0      |



|          |       |       |
|----------|-------|-------|
| SNORD51  | 0.1   | 0     |
| SNORD52  | 0.192 | 0     |
| SNORD53  | 0.463 | 16.45 |
| SNORD54  | 0.1   | 0.99  |
| SNORD55  | 0.1   | 12.86 |
| SNORD56  | 0.1   | 16.82 |
| SNORD57  | 0.1   | 5.94  |
| SNORD58A | 0.1   | 3.96  |
| SNORD59A | 0.1   | 13.85 |
| SNORD6   | 0.1   | 2.97  |
| SNORD60  | 0.339 | 75.88 |
| SNORD61  | 0.1   | 0     |
| SNORD62A | 6.629 | 24.22 |
| SNORD63  | 0.1   | 0     |
| SNORD64  | 0.1   | 0     |
| SNORD68  | 0.1   | 32.65 |
| SNORD7   | 0.1   | 1.98  |
| SNORD72  | 0.1   | 0     |
| SNORD73A | 0.1   | 12.86 |
| SNORD73B | 0.1   | 0     |
| SNORD74  | 0.1   | 0     |
| SNORD8   | 0.109 | 0     |
| SNORD83A | 0.1   | 1.98  |
| SNORD83B | 0.1   | 5.94  |
| SNORD87  | 0.1   | 8.91  |
| SNORD9   | 0.103 | 0.96  |
| SNORD95  | 0.1   | 4.95  |
| SNORD96A | 0.1   | 1.98  |
| SNPH     | 4.994 | 0.06  |
| SNRK     | 5.119 | 25.55 |
| SNRP70   | 7.414 | 64.59 |
| SNRPA    | 1.606 | 30.56 |
| SNRPA1   | 2.182 | 34.28 |
| SNRPB    | 1.88  | 64.52 |
| SNRPB2   | 1.596 | 15.38 |
| SNRPC    | 0.71  | 40.55 |
| SNRPD1   | 1.6   | 19.11 |
| SNRPD2   | 1.159 | 76.06 |
| SNRPD3   | 1.685 | 16.97 |
| SNRPE    | 1.547 | 10.17 |
| SNRPEL1  | 0.279 | 2.84  |
| SNRPF    | 0.793 | 42.29 |
| SNRPF1   | 0.255 | 26.77 |
| SNRPG    | 0.58  | 10.24 |
| SNRPGP   | 0.388 | 0     |
| SNRPN    | 2.169 | 6.25  |
| SNTA1    | 2.34  | 3.25  |
| SNTB1    | 2.979 | 0.23  |
| SNTB2    | 1.7   | 0.99  |
| SNTG1    | 1.889 | 0     |

|         |        |        |
|---------|--------|--------|
| SNTG2   | 1.412  | 0.14   |
| SNUPN   | 1.434  | 2.14   |
| SNURF   | 1.351  | 16.26  |
| SNW1    | 2.127  | 34.37  |
| SNX1    | 8.221  | 9.52   |
| SNX10   | 5.156  | 0.28   |
| SNX11   | 2.656  | 1.68   |
| SNX12   | 0.642  | 3.08   |
| SNX13   | 10.2   | 1.78   |
| SNX14   | 3.505  | 3.98   |
| SNX15   | 1.909  | 2.74   |
| SNX16   | 3.37   | 1.12   |
| SNX17   | 2.043  | 31.53  |
| SNX19   | 6.049  | 6.07   |
| SNX2    | 2.069  | 94.58  |
| SNX21   | 4.558  | 1.54   |
| SNX22   | 3.614  | 5.56   |
| SNX24   | 2.024  | 0.04   |
| SNX25   | 3.213  | 0.47   |
| SNX26   | 3.859  | 7.21   |
| SNX27   | 7.085  | 1      |
| SNX3    | 1.463  | 35.78  |
| SNX30   | 7.584  | 14.87  |
| SNX4    | 2.524  | 6.35   |
| SNX5    | 5.091  | 33.08  |
| SNX6    | 3.3    | 9.08   |
| SNX7    | 2.337  | 7.66   |
| SNX8    | 6.453  | 37.61  |
| SNX9    | 7.18   | 35.13  |
| SOAT1   | 3.393  | 5.83   |
| SOAT2   | 2.035  | 0.04   |
| SOCS1   | 1.216  | 17.57  |
| SOCS2   | 4.242  | 175.95 |
| SOCS2P1 | 0.902  | 0      |
| SOCS2P2 | 1.64   | 0      |
| SOCS3   | 2.734  | 3.55   |
| SOCS4   | 7.013  | 3.26   |
| SOCS5   | 4.662  | 6.75   |
| SOCS6   | 2.635  | 4.28   |
| SOCS7   | 2.153  | 0.51   |
| SOD1    | 0.966  | 44.45  |
| SOD2    | 2.995  | 63.39  |
| SOD3    | 1.984  | 0      |
| SOHLH1  | 1.987  | 0      |
| SOHLH2  | 2.108  | 0      |
| SOLH    | 4.744  | 4.92   |
| SON     | 10.129 | 32.42  |
| SONP1   | 2.49   | 1.51   |
| SORBS1  | 8.027  | 0.98   |
| SORBS2  | 6.818  | 0      |

|         |        |       |
|---------|--------|-------|
| SORBS3  | 6.318  | 48.05 |
| SORCS1  | 11.056 | 0     |
| SORCS2  | 5.955  | 0.06  |
| SORCS3  | 5.757  | 0     |
| SORD    | 2.515  | 1.69  |
| SORL1   | 8.936  | 12.53 |
| SORT1   | 7.018  | 23.62 |
| SOS1    | 4.286  | 4.13  |
| SOS2    | 3.999  | 6.56  |
| SOST    | 2.3    | 0     |
| SOSTDC1 | 3.738  | 0     |
| SOX1    | 4.108  | 0.03  |
| SOX10   | 2.862  | 0.04  |
| SOX11   | 8.719  | 0.01  |
| SOX12   | 4.63   | 2.5   |
| SOX13   | 4.073  | 0.22  |
| SOX14   | 0.818  | 0     |
| SOX15   | 1.394  | 0.36  |
| SOX17   | 1.825  | 0     |
| SOX18   | 1.705  | 0.23  |
| SOX2    | 2.503  | 0.04  |
| SOX21   | 2.514  | 0     |
| SOX2OT  | 3.042  | 0     |
| SOX3    | 2.074  | 0     |
| SOX30   | 4.308  | 0     |
| SOX4    | 4.879  | 16.3  |
| SOX5    | 4.946  | 0.02  |
| SOX5P   | 1.45   | 0     |
| SOX6    | 5.937  | 0     |
| SOX7    | 3.216  | 1.11  |
| SOX8    | 3.049  | 0.23  |
| SOX9    | 3.935  | 0     |
| SP1     | 7.661  | 12.01 |
| SP100   | 3.918  | 14.36 |
| SP110   | 2.683  | 4.5   |
| SP140   | 3.567  | 0.75  |
| SP2     | 2.968  | 9.56  |
| SP3     | 6.125  | 14.99 |
| SP4     | 11.622 | 0.91  |
| SP5     | 1.942  | 0     |
| SP6     | 3.794  | 0.08  |
| SP7     | 2.974  | 0     |
| SP8     | 10.682 | 0     |
| SPA17   | 0.94   | 0     |
| SPA17P1 | 0.689  | 0     |
| SPACA1  | 1.499  | 0     |
| SPACA3  | 0.819  | 0     |
| SPACA4  | 0.972  | 0     |
| SPACA5  | 0.732  | 0     |
| SPACA5B | 0.732  | 0     |

|          |       |       |
|----------|-------|-------|
| SPAG1    | 3.936 | 0.05  |
| SPAG11   | 1.761 | 0     |
| SPAG11A  | 2.182 | 0     |
| SPAG16   | 2.933 | 0.24  |
| SPAG17   | 7.111 | 0     |
| SPAG4    | 1.452 | 2.25  |
| SPAG4L   | 1.252 | 0     |
| SPAG5    | 3.808 | 2.28  |
| SPAG6    | 3.586 | 0     |
| SPAG7    | 1.001 | 19.57 |
| SPAG8    | 2.332 | 0.21  |
| SPAG9    | 6.834 | 12.22 |
| SPAM1    | 6.062 | 0.21  |
| SPANXA1  | 0.384 | 0     |
| SPANXA2  | 0.63  | 0     |
| SPANXB1  | 0.469 | 0     |
| SPANXC   | 0.404 | 0     |
| SPANXD   | 0.384 | 0     |
| SPANXE   | 0.441 | 0     |
| SPANXN1  | 1.276 | 0     |
| SPANXN2  | 1.377 | 0     |
| SPANXN3  | 0.594 | 0     |
| SPANXN4  | 0.3   | 0     |
| SPANXN5  | 1.316 | 0     |
| SPARC    | 3.141 | 10.11 |
| SPARCL1  | 2.756 | 0     |
| SPAST    | 5.213 | 0.76  |
| SPATA1   | 1.509 | 0.2   |
| SPATA12  | 2.413 | 0     |
| SPATA13  | 3.503 | 2.43  |
| SPATA16  | 2.05  | 0     |
| SPATA17  | 1.235 | 0     |
| SPATA18  | 4.3   | 0     |
| SPATA19  | 0.866 | 0     |
| SPATA2   | 4.045 | 5.92  |
| SPATA20  | 2.607 | 9.98  |
| SPATA21  | 2.682 | 17.12 |
| SPATA22  | 1.457 | 0     |
| SPATA2L  | 2.317 | 1.8   |
| SPATA3   | 1.618 | 0     |
| SPATA4   | 1.233 | 0     |
| SPATA5   | 3.341 | 0.29  |
| SPATA5L1 | 2.509 | 0.55  |
| SPATA6   | 1.739 | 0.05  |
| SPATA7   | 1.993 | 1.14  |
| SPATA8   | 1.026 | 0     |
| SPATA9   | 1.82  | 0.05  |
| SPATC1   | 2.011 | 0.05  |
| SPATS1   | 1.354 | 0.07  |
| SPATS2   | 2.993 | 5.32  |

|          |        |       |
|----------|--------|-------|
| SPC24    | 2.289  | 2.29  |
| SPC25    | 1.346  | 1.1   |
| SPCS1    | 1.096  | 33.94 |
| SPCS2    | 1.37   | 12.42 |
| SPCS3    | 2.118  | 11.02 |
| SPDEF    | 1.894  | 0     |
| SPDYA    | 2.438  | 0.33  |
| SPDYC    | 0.882  | 0     |
| SPECC1   | 4.706  | 0.63  |
| SPECC1L  | 6.211  | 3.33  |
| SPEG     | 0.519  | 0     |
| SPEN     | 12.935 | 23.06 |
| SPERT    | 1.613  | 0     |
| SPESP1   | 1.403  | 0.56  |
| SPG20    | 4.822  | 1.15  |
| SPG21    | 1.798  | 9.69  |
| SPG3A    | 2.245  | 0     |
| SPG7     | 5.049  | 18.18 |
| SPHAR    | 0.968  | 0     |
| SPHK1    | 2.997  | 5.32  |
| SPHK2    | 2.963  | 1.64  |
| SPI1     | 1.373  | 94.68 |
| SPIB     | 1.448  | 0.41  |
| SPIC     | 0.999  | 0     |
| SPIN1    | 3.83   | 33.79 |
| SPIN2A   | 1.319  | 0.9   |
| SPIN2B   | 1.518  | 1.56  |
| SPIN3    | 1.642  | 0     |
| SPINK1   | 0.438  | 0     |
| SPINK2   | 0.591  | 0     |
| SPINK4   | 0.368  | 0     |
| SPINK5   | 3.61   | 0     |
| SPINK5L2 | 0.294  | 0     |
| SPINK5L3 | 0.285  | 0     |
| SPINK6   | 0.686  | 0     |
| SPINK7   | 0.55   | 0     |
| SPINK8   | 0.44   | 0     |
| SPINK9   | 0.453  | 0     |
| SPINLW1  | 2.691  | 0     |
| SPINT1   | 2.755  | 0.65  |
| SPINT2   | 1.552  | 48.45 |
| SPINT4   | 0.514  | 0     |
| SPIRE1   | 5.402  | 0.05  |
| SPIRE2   | 3.244  | 0     |
| SPN      | 6.973  | 4.99  |
| SPO11    | 1.817  | 0     |
| SPOCD1   | 3.888  | 0     |
| SPOCK1   | 4.827  | 0     |
| SPOCK2   | 5.305  | 44.05 |
| SPOCK3   | 2.989  | 0     |

|         |        |       |
|---------|--------|-------|
| SPON1   | 4.754  | 0.84  |
| SPON2   | 1.802  | 3.63  |
| SPOP    | 3.141  | 8.82  |
| SPP1    | 1.625  | 0     |
| SPP2    | 1.019  | 0     |
| SPPL2A  | 1.929  | 3.64  |
| SPPL2B  | 7.908  | 40.49 |
| SPR     | 1.42   | 0.07  |
| SPRED1  | 3.816  | 1.09  |
| SPRED2  | 4.097  | 5.96  |
| SPRED3  | 0.543  | 0     |
| SPRN    | 3.219  | 0.43  |
| SPRR1A  | 0.648  | 0     |
| SPRR1B  | 0.619  | 0     |
| SPRR2A  | 0.677  | 0     |
| SPRR2B  | 0.662  | 0     |
| SPRR2D  | 0.79   | 0     |
| SPRR2E  | 0.678  | 0     |
| SPRR2F  | 0.657  | 0     |
| SPRR2G  | 0.56   | 0     |
| SPRR3   | 0.984  | 0     |
| SPRR4   | 0.766  | 0     |
| SPRY1   | 3.819  | 11.39 |
| SPRY2   | 2.111  | 25.12 |
| SPRY3   | 18.076 | 0.25  |
| SPRY4   | 4.925  | 0.8   |
| SPRYD3  | 2.568  | 1.16  |
| SPRYD4  | 1.077  | 2.84  |
| SPRYD5  | 1.269  | 0     |
| SPSB1   | 3.075  | 3.22  |
| SPSB2   | 1.188  | 0.84  |
| SPSB3   | 2.612  | 29.06 |
| SPSB4   | 2.418  | 0.08  |
| SPTA1   | 7.999  | 2.07  |
| SPTAN1  | 10.503 | 37.7  |
| SPTB    | 10.436 | 0.2   |
| SPTBN1  | 13.076 | 72.57 |
| SPTBN2  | 7.864  | 0.22  |
| SPTBN4  | 9.919  | 0.02  |
| SPTBN5  | 11.722 | 0.35  |
| SPTLC1  | 3.283  | 6.11  |
| SPTLC2  | 8.042  | 12.1  |
| SPTLC3  | 2.26   | 0.09  |
| SPTY2D1 | 5.734  | 3.87  |
| SPZ1    | 1.819  | 0     |
| SOLE    | 2.99   | 1.42  |
| SQRDL   | 1.672  | 1.65  |
| SQSTM1  | 4.102  | 37    |
| SR140   | 7.464  | 9.72  |
| SRA1    | 1.511  | 13.81 |

|          |        |        |
|----------|--------|--------|
| SR-A1    | 4.193  | 17.37  |
| SRBD1    | 3.663  | 1.84   |
| SRC      | 4.201  | 2.1    |
| SRCAP    | 9.442  | 12.18  |
| SRCRB4D  | 5.612  | 0.21   |
| SRD5A1   | 2.264  | 0.39   |
| SRD5A2   | 2.445  | 0      |
| SRD5A2L  | 2.272  | 0.3    |
| SRD5A2L2 | 3.571  | 0      |
| SRD5AP1  | 2.158  | 0.09   |
| SREBF1   | 4.278  | 17.07  |
| SREBF2   | 4.898  | 16.35  |
| SRF      | 4.318  | 5.62   |
| SRFBP1   | 2.17   | 1.37   |
| SRGAP1   | 4.436  | 0      |
| SRGAP2   | 6.323  | 4.49   |
| SRGAP3   | 14.332 | 0.04   |
| SRGN     | 1.254  | 109.67 |
| SRI      | 4.19   | 3.35   |
| SRIL     | 0.483  | 3.69   |
| SRL      | 5.587  | 0.02   |
| SRM      | 1.273  | 16.56  |
| SRMP1    | 0.885  | 0.56   |
| SRMP2    | 1.117  | 0      |
| SRMS     | 1.516  | 0.06   |
| SRP14    | 0.775  | 173.11 |
| SRP14P1  | 0.332  | 94.47  |
| SRP19    | 1.258  | 14.39  |
| SRP54    | 2.149  | 9.76   |
| SRP68    | 2.515  | 12.86  |
| SRP72    | 3.848  | 12.77  |
| SRP9     | 2.024  | 24.49  |
| SRPK1    | 4.361  | 4.77   |
| SRPK2    | 10.947 | 7.82   |
| SRPK3    | 1.948  | 0.81   |
| SRPR     | 3.542  | 42.4   |
| SRPRB    | 1.745  | 4.65   |
| SRPX     | 1.853  | 0      |
| SRPX2    | 2.132  | 0      |
| SRR      | 2.477  | 1.04   |
| SRRM1    | 3.923  | 21.34  |
| SRRM2    | 9.027  | 110.38 |
| SRrp35   | 0.995  | 0      |
| SRXN1    | 2.574  | 0.27   |
| SRY      | 0.897  | 0      |
| SS18     | 3.436  | 15.75  |
| SS18L1   | 7.038  | 1.16   |
| SS18L2   | 0.818  | 10.4   |
| SSB      | 1.643  | 14.27  |
| SSBP1    | 1.643  | 15.41  |

|            |        |       |
|------------|--------|-------|
| SSBP2      | 2.807  | 25.37 |
| SSBP3      | 4.05   | 0.58  |
| SSBP4      | 1.884  | 2.26  |
| SSFA2      | 4.961  | 6.58  |
| SSH1       | 4.023  | 0.79  |
| SSH2       | 11.183 | 22.1  |
| SSH3       | 3.967  | 0.45  |
| SSNA1      | 0.858  | 23.06 |
| SSPN       | 2.695  | 0     |
| SSPO       | 12.25  | 0.76  |
| SSR1       | 3.236  | 12.63 |
| SSR2       | 1.092  | 84.99 |
| SSR3       | 3.064  | 8.3   |
| SSR4       | 0.902  | 79.74 |
| SSRP1      | 2.819  | 19.58 |
| SSSCA1     | 0.654  | 6.05  |
| SST        | 0.632  | 0     |
| SSTR1      | 4.291  | 0     |
| SSTR2      | 2.996  | 0     |
| SSTR3      | 2.123  | 0     |
| SSTR4      | 1.167  | 0     |
| SSTR5      | 1.095  | 0     |
| SSU72      | 2.801  | 19.82 |
| SSX1       | 1.253  | 0     |
| SSX2       | 1.553  | 0     |
| SSX2IP     | 5.631  | 0.44  |
| SSX3       | 1.513  | 0     |
| SSX4       | 1.91   | 0     |
| SSX4B      | 1.902  | 0     |
| SSX5       | 1.384  | 0     |
| SSX6       | 1.281  | 0     |
| SSX7       | 1.34   | 0     |
| SSX8       | 1.254  | 0     |
| SSX9       | 1.23   | 0     |
| ST13       | 3.196  | 8.48  |
| ST13P      | 1.73   | 0     |
| ST14       | 3.3    | 2.49  |
| ST18       | 6.187  | 0     |
| ST3GAL1    | 7.745  | 32.5  |
| ST3GAL2    | 2.479  | 1.28  |
| ST3GAL3    | 3.596  | 5.31  |
| ST3GAL4    | 1.743  | 4.49  |
| ST3GAL5    | 2.362  | 8.8   |
| ST3GAL6    | 2.095  | 1.8   |
| ST5        | 4.705  | 0.48  |
| ST6GAL1    | 4.629  | 2.39  |
| ST6GAL2    | 1.794  | 0     |
| ST6GALNAC1 | 2.544  | 0     |
| ST6GALNAC2 | 1.867  | 0.05  |
| ST6GALNAC3 | 3.207  | 0.06  |



|            |        |        |
|------------|--------|--------|
| ST6GALNAC4 | 2.104  | 8.27   |
| ST6GALNAC5 | 2.032  | 0      |
| ST6GALNAC6 | 2.398  | 15.43  |
| ST7        | 6.322  | 0.74   |
| ST7L       | 4.861  | 1.24   |
| ST7OT1     | 3.778  | 1.47   |
| ST7OT2     | 1.836  | 0.11   |
| ST7OT4     | 3.148  | 0.06   |
| ST8SIA1    | 2.106  | 0.04   |
| ST8SIA2    | 5.626  | 0      |
| ST8SIA3    | 3.504  | 0      |
| ST8SIA4    | 7.744  | 3.19   |
| ST8SIA5    | 2.623  | 0.15   |
| ST8SIA6    | 1.398  | 0.21   |
| STAB1      | 8.123  | 109.34 |
| STAB2      | 8.23   | 0.01   |
| STAC       | 2.963  | 0      |
| STAC2      | 3.211  | 0      |
| STAC3      | 1.643  | 1.32   |
| STAG1      | 5.166  | 6.47   |
| STAG2      | 5.81   | 25.1   |
| STAG3      | 9.536  | 54.03  |
| STAM       | 2.966  | 36.16  |
| STAM2      | 3.91   | 1.52   |
| STAMBP     | 2.618  | 2      |
| STAMBPL1   | 1.997  | 0.15   |
| STAP2      | 1.612  | 2.83   |
| STAR       | 2.826  | 0.21   |
| STARD10    | 1.419  | 2.51   |
| STARD13    | 6.771  | 0.25   |
| STARD3     | 3.331  | 35.17  |
| STARD3NL   | 3.234  | 4.75   |
| STARD4     | 2.264  | 0.79   |
| STARD5     | 2.187  | 0.54   |
| STARD6     | 0.663  | 0      |
| STARD7     | 3.776  | 31.28  |
| STARD8     | 4.858  | 3.61   |
| STARD9     | 15.083 | 4.92   |
| STARP1     | 1.104  | 0      |
| STAT1      | 4.504  | 1.72   |
| STAT2      | 4.426  | 9.08   |
| STAT3      | 7.832  | 10.47  |
| STAT4      | 2.761  | 1.22   |
| STAT5A     | 4.298  | 29.63  |
| STAT5B     | 5.094  | 7.24   |
| STAT6      | 3.979  | 18.62  |
| STATH      | 0.6    | 0      |
| STATIP1    | 3.624  | 15.87  |
| STAU1      | 4.177  | 14.69  |
| STAU2      | 4.042  | 0.79   |

|         |        |       |
|---------|--------|-------|
| STC1    | 3.877  | 0     |
| STC2    | 5.343  | 0.67  |
| STCH    | 3.987  | 2.83  |
| STEAP1  | 2.626  | 0     |
| STEAP2  | 13.714 | 0     |
| STEAP3  | 4.853  | 0.02  |
| STEAP4  | 4.88   | 0.02  |
| STELLAR | 1.219  | 0     |
| STGC3   | 1.232  | 0     |
| STH     | 0.387  | 0     |
| STIL    | 5.185  | 0.75  |
| STIM1   | 4.671  | 20.35 |
| STIM2   | 5.156  | 7.63  |
| STIP1   | 2.111  | 7.17  |
| STK10   | 4.383  | 12.59 |
| STK11   | 3.276  | 9.7   |
| STK11IP | 3.602  | 4.89  |
| STK16   | 2.031  | 13.05 |
| STK16P  | 1.55   | 0.26  |
| STK17A  | 5.286  | 5.28  |
| STK17B  | 2.938  | 38.35 |
| STK19   | 5.184  | 0.04  |
| STK19P  | 0.915  | 0     |
| STK24   | 6.82   | 35.55 |
| STK25   | 2.519  | 18.3  |
| STK3    | 2.82   | 1.16  |
| STK31   | 7.728  | 0     |
| STK32A  | 0.798  | 0     |
| STK32B  | 5.333  | 49.29 |
| STK32C  | 2.119  | 0.14  |
| STK33   | 2.707  | 0.59  |
| STK35   | 6.015  | 10.03 |
| STK36   | 4.873  | 1.97  |
| STK38   | 4.847  | 12.9  |
| STK38L  | 4.706  | 3     |
| STK39   | 3.273  | 4.6   |
| STK4    | 6.331  | 7.79  |
| STK40   | 3.846  | 18.34 |
| STK6LP  | 1.198  | 0     |
| STK6P   | 1.537  | 1.67  |
| STMN1   | 1.918  | 22.43 |
| STMN2   | 0.719  | 0     |
| STMN3   | 2.255  | 57.83 |
| STMN4   | 1.314  | 0     |
| STOM    | 5.199  | 10.09 |
| STOML1  | 1.986  | 0.69  |
| STOML2  | 1.278  | 10.53 |
| STOML3  | 1.901  | 0     |
| STON1   | 5.822  | 0.12  |
| STON2   | 3.12   | 2.57  |

|         |       |       |
|---------|-------|-------|
| STOX1   | 3.293 | 0.06  |
| STOX2   | 4.654 | 0.06  |
| STRA13  | 0.73  | 5.96  |
| STRA6   | 2.772 | 0     |
| STRA8   | 1.986 | 0     |
| STRAP   | 1.849 | 63.52 |
| STRBP   | 3.007 | 10.96 |
| STRC    | 5.515 | 0.11  |
| STRN    | 4.082 | 6.06  |
| STRN3   | 3.947 | 4.66  |
| STRN4   | 3.305 | 19.73 |
| STS     | 6.352 | 0.75  |
| STS-1   | 6.865 | 25.11 |
| STSP    | 0.775 | 0     |
| STT3A   | 2.463 | 10.76 |
| STT3B   | 4.268 | 35.93 |
| STUB1   | 1.602 | 11.42 |
| STX10   | 0.921 | 18.48 |
| STX11   | 1.916 | 2.22  |
| STX12   | 2.847 | 19.63 |
| STX16   | 5.029 | 43.04 |
| STX17   | 2.662 | 5.8   |
| STX18   | 2.158 | 7.47  |
| STX19   | 1.158 | 0     |
| STX1A   | 4.13  | 0.14  |
| STX1B2  | 1.699 | 0.18  |
| STX2    | 5.835 | 0.28  |
| STX3    | 3.747 | 42.93 |
| STX4    | 1.386 | 29.77 |
| STX5    | 1.794 | 25.09 |
| STX6    | 4.536 | 4.05  |
| STX7    | 2.756 | 10.12 |
| STX8    | 0.968 | 6.85  |
| STXBP1  | 5.826 | 0.17  |
| STXBP2  | 2.395 | 21.44 |
| STXBP3  | 2.48  | 5.39  |
| STXBP4  | 6.046 | 0.16  |
| STXBP5  | 4.822 | 0.25  |
| STXBP5L | 5.179 | 0     |
| STXBP6  | 1.97  | 0     |
| STYK1   | 2.743 | 0.94  |
| STYX    | 2.591 | 1.15  |
| STYXL1  | 2.832 | 1.12  |
| SUB1    | 1.574 | 16.91 |
| SUCLA2  | 2.164 | 2.83  |
| SUCLG1  | 1.444 | 27.2  |
| SUCLG2  | 2.319 | 5.37  |
| SUCNR1  | 1.418 | 0.14  |
| SUDS3   | 4.728 | 5.94  |
| SUFU    | 4.898 | 1.35  |

|          |       |       |
|----------|-------|-------|
| SUGT1    | 1.52  | 8.46  |
| SUGT1L1  | 0.519 | 2.86  |
| SUHW1    | 2.148 | 0     |
| SUHW2    | 5.733 | 0.02  |
| SUHW3    | 4.634 | 0.66  |
| SUHW4    | 6.373 | 3.24  |
| SULF1    | 5.7   | 0     |
| SULF2    | 3.897 | 1.8   |
| SULT1A1  | 2.715 | 2.51  |
| SULT1A2  | 1.396 | 0.57  |
| SULT1A3  | 1.755 | 5.92  |
| SULT1A4  | 1.82  | 5.71  |
| SULT1B1  | 1.309 | 0     |
| SULT1C1  | 2.926 | 0     |
| SULT1C2  | 1.664 | 0.48  |
| SULT1C3  | 0.915 | 0     |
| SULT1D1P | 22    | 0.01  |
| SULT1E1  | 1.78  | 0     |
| SULT2A1  | 1.779 | 0     |
| SULT2B1  | 1.548 | 0     |
| SULT4A1  | 2.465 | 0.04  |
| SULT6B1  | 0.934 | 0     |
| SUMF1    | 2.148 | 2.49  |
| SUMF2    | 4.01  | 12.85 |
| SUMO1    | 2.151 | 12.38 |
| SUMO1P1  | 1.197 | 0     |
| SUMO1P2  | 0.944 | 0.21  |
| SUMO1P3  | 1.21  | 4.42  |
| SUMO1P4  | 1.458 | 1.09  |
| SUMO2    | 1.066 | 22.18 |
| SUMO2P   | 3.075 | 0     |
| SUMO3    | 1.807 | 42.22 |
| SUMO4    | 0.688 | 0.14  |
| SUNC1    | 3.068 | 0.19  |
| SUOX     | 2.462 | 6.23  |
| SUPT16H  | 4.68  | 12.5  |
| SUPT3H   | 2.563 | 4.4   |
| SUPT4H1  | 2.243 | 31.32 |
| SUPT5H   | 4.328 | 34.06 |
| SUPT6H   | 5.877 | 32.8  |
| SUPT7L   | 4.546 | 12.53 |
| SUPV3L1  | 2.474 | 12.64 |
| SURB7    | 1.753 | 3.05  |
| SURF1    | 1.037 | 12.59 |
| SURF2    | 0.831 | 5.48  |
| SURF4    | 2.969 | 23.43 |
| SURF5    | 4.882 | 2.61  |
| SURF6    | 2.314 | 4.96  |
| SUSD1    | 2.996 | 1.62  |
| SUSD2    | 3.183 | 0.28  |

|          |        |       |
|----------|--------|-------|
| SUSD3    | 2.09   | 31.53 |
| SUSD4    | 3.343  | 0.03  |
| SUSD5    | 5.149  | 0.02  |
| SUV39H1  | 2.726  | 3.34  |
| SUV39H2  | 3.087  | 0.58  |
| SUV420H1 | 6.022  | 4.76  |
| SUV420H2 | 2.266  | 1.92  |
| SUZ12    | 4.441  | 6.64  |
| SUZ12P   | 38.28  | 0.94  |
| SV2A     | 4.857  | 32.12 |
| SV2B     | 5.311  | 1.34  |
| SV2C     | 2.362  | 0.08  |
| SVEP1    | 10.707 | 0     |
| SVIL     | 8.547  | 1.12  |
| SVOP     | 2.532  | 0     |
| SVOPL    | 2.842  | 0     |
| SWAP70   | 6.114  | 25.41 |
| SYAP1    | 2.023  | 14.87 |
| SYBL1    | 5.152  | 5.99  |
| SYCE1    | 2.682  | 0     |
| SYCN     | 1.105  | 0     |
| SYCP1    | 3.491  | 0     |
| SYCP2    | 5.48   | 0.04  |
| SYCP3    | 1.122  | 1.68  |
| SYDE1    | 3.254  | 1.49  |
| SYDE2    | 4.02   | 0.03  |
| SYF2     | 1.77   | 64.67 |
| SYF2P    | 0.439  | 6.08  |
| SYK      | 3.72   | 12.55 |
| SYMPK    | 3.985  | 13.46 |
| SYN1     | 4.271  | 0.12  |
| SYN2     | 5.085  | 0     |
| SYN3     | 4.19   | 0     |
| SYNC1    | 2.937  | 7.85  |
| SYNCRIP  | 5.372  | 27.73 |
| SYNE1    | 29.529 | 0.81  |
| SYNE2    | 24.122 | 3.55  |
| SYNGAP1  | 6.01   | 2.01  |
| SYNGR1   | 5.823  | 9.26  |
| SYNGR2   | 1.694  | 12.62 |
| SYNGR3   | 2.029  | 0.49  |
| SYNGR4   | 1.009  | 0     |
| SYNJ1    | 10.147 | 1.85  |
| SYNJ2    | 6.738  | 1.17  |
| SYNJ2BP  | 1.354  | 3.95  |
| SYNPO    | 3.524  | 0.48  |
| SYNPO2   | 7.295  | 0.05  |
| SYNPO2L  | 3.47   | 0     |
| SYNPR    | 2.336  | 0     |
| SYP      | 2.433  | 0.2   |

|         |        |       |
|---------|--------|-------|
| SYPL1   | 4.67   | 14.06 |
| SYPL2   | 1.665  | 0     |
| SYT1    | 3.225  | 0.98  |
| SYT10   | 3.286  | 0     |
| SYT11   | 5.096  | 9.33  |
| SYT12   | 3.432  | 0     |
| SYT13   | 5.08   | 0     |
| SYT14   | 2.966  | 0     |
| SYT15   | 5.122  | 0.38  |
| SYT16   | 1.878  | 0     |
| SYT17   | 1.912  | 0.05  |
| SYT2    | 2.434  | 0.04  |
| SYT3    | 2.915  | 0     |
| SYT4    | 3.825  | 0     |
| SYT5    | 1.825  | 0     |
| SYT6    | 1.897  | 0     |
| SYT7    | 4.532  | 0     |
| SYT8    | 1.423  | 0     |
| SYT9    | 3.955  | 0     |
| SYTL1   | 1.898  | 15.74 |
| SYTL2   | 7.493  | 0.29  |
| SYTL3   | 2.223  | 8.54  |
| SYTL4   | 3.885  | 0     |
| SYTL5   | 2.193  | 0     |
| SYVN1   | 4.525  | 30.65 |
| T       | 2.518  | 0     |
| TAAR1   | 1.02   | 0     |
| TAAR2   | 1.056  | 0     |
| TAAR3   | 1.114  | 0     |
| TAAR4P  | 1.049  | 0     |
| TAAR5   | 1.014  | 0     |
| TAAR6   | 1.038  | 0     |
| TAAR7P  | 0.21   | 0     |
| TAAR8   | 1.029  | 0     |
| TAAR9   | 1.049  | 0     |
| TAC1    | 2.168  | 0     |
| TAC3    | 1.008  | 0     |
| TAC4    | 0.225  | 0     |
| TACC1   | 7.743  | 10.93 |
| TACC2   | 10.096 | 0.05  |
| TACC3   | 3.447  | 11.05 |
| TACR1   | 2.301  | 0     |
| TACR2   | 1.197  | 0.08  |
| TACR3   | 1.753  | 0     |
| TACSTD1 | 1.528  | 0.06  |
| TACSTD2 | 2.803  | 0     |
| TADA1L  | 2.074  | 1.67  |
| TADA2L  | 2.063  | 0.86  |
| TADA3L  | 3.323  | 2.92  |
| TAF1    | 7.016  | 8.56  |

|          |        |        |
|----------|--------|--------|
| TAF10    | 0.896  | 73.65  |
| TAF11    | 1.994  | 32.95  |
| TAF12    | 1.09   | 4.36   |
| TAF13    | 0.577  | 7.2    |
| TAF13P   | 0.294  | 0.68   |
| TAF15    | 3.021  | 86.13  |
| TAF1A    | 2.116  | 0.14   |
| TAF1B    | 2.297  | 0.86   |
| TAF1C    | 5.11   | 15.55  |
| TAF1L    | 6.216  | 1.64   |
| TAF2     | 5.019  | 5      |
| TAF2GL   | 0.753  | 0      |
| TAF3     | 7.355  | 0.78   |
| TAF4     | 4.628  | 1.71   |
| TAF4B    | 4.772  | 0.93   |
| TAF5     | 3.268  | 1.18   |
| TAF5L    | 6.848  | 3.25   |
| TAF6     | 6.672  | 2.41   |
| TAF6L    | 2.016  | 2.41   |
| TAF7     | 2.295  | 52.47  |
| TAF7L    | 2.341  | 0      |
| TAF9     | 5.584  | 6.41   |
| TAF9B    | 2.689  | 3.75   |
| TAF9P1   | 1.38   | 0      |
| TAF9P2   | 1.216  | 0      |
| TAGAP    | 3.956  | 40.51  |
| TAGLN    | 2.028  | 5.17   |
| TAGLN2   | 1.36   | 208.71 |
| TAGLN3   | 1.754  | 0      |
| tAKR     | 0.918  | 0.44   |
| TAL1     | 5.001  | 0.08   |
| TAL2     | 0.327  | 0.3    |
| TALDO1   | 1.243  | 23.24  |
| TANC1    | 7.507  | 0.76   |
| TANC2    | 11.577 | 0.04   |
| TA-NFKBH | 1.834  | 7.66   |
| TANK     | 2.394  | 2.81   |
| TAOK1    | 4.662  | 1.65   |
| TAOK2    | 6.759  | 2.18   |
| TAOK3    | 4.185  | 5.48   |
| TAP1     | 8.856  | 1      |
| TAP2     | 18.495 | 0.03   |
| TAPBP    | 17.132 | 0.03   |
| TAPBPL   | 1.718  | 5.41   |
| TAPT1    | 6.089  | 55.94  |
| TARBP1   | 6.357  | 23.81  |
| TARBP2   | 2.244  | 3.93   |
| TARBP2P  | 1.049  | 0.47   |
| TARDBP   | 4.217  | 54.31  |
| TARP     | 3.89   | 3.05   |

|          |       |       |
|----------|-------|-------|
| TARS     | 2.85  | 12.33 |
| TARS2    | 2.38  | 5.49  |
| TARSL2   | 3.294 | 4.12  |
| TAS1R1   | 4.266 | 0     |
| TAS1R2   | 2.521 | 0     |
| TAS1R3   | 2.559 | 0.15  |
| TAS2R1   | 1.355 | 0     |
| TAS2R10  | 0.924 | 0     |
| TAS2R12  | 0.948 | 0     |
| TAS2R13  | 1.637 | 0     |
| TAS2R14  | 0.954 | 0.11  |
| TAS2R15  | 0.903 | 0.22  |
| TAS2R16  | 1.992 | 0     |
| TAS2R2   | 1.82  | 0     |
| TAS2R3   | 2.202 | 0     |
| TAS2R38  | 2.286 | 0.95  |
| TAS2R39  | 2.028 | 0     |
| TAS2R4   | 1.8   | 0     |
| TAS2R40  | 1.944 | 0     |
| TAS2R41  | 1.844 | 0     |
| TAS2R42  | 1.469 | 4.71  |
| TAS2R43  | 0.928 | 0.32  |
| TAS2R44  | 0.928 | 0.11  |
| TAS2R46  | 0.899 | 0.22  |
| TAS2R48  | 0.9   | 0.44  |
| TAS2R49  | 0.93  | 0     |
| TAS2R5   | 2.3   | 0.35  |
| TAS2R50  | 0.9   | 0     |
| TAS2R60  | 1.914 | 0     |
| TAS2R62P | 1.878 | 0     |
| TAS2R63P | 0.885 | 0     |
| TAS2R64P | 0.93  | 0.32  |
| TAS2R65P | 0.919 | 0.32  |
| TAS2R7   | 1.096 | 0     |
| TAS2R8   | 0.93  | 0     |
| TAS2R9   | 1.075 | 0     |
| TASP1    | 2.315 | 2.39  |
| TAT      | 2.754 | 0     |
| TATDN1   | 1.004 | 2.86  |
| TATDN2   | 4.484 | 12.31 |
| TATDN3   | 3.066 | 1.55  |
| TAX1BP1  | 5.78  | 9.02  |
| TAX1BP3  | 1.381 | 11.17 |
| TAZ      | 3.389 | 14.95 |
| TBC1D1   | 6.282 | 23.12 |
| TBC1D10A | 1.936 | 11.55 |
| TBC1D10B | 3.093 | 16.25 |
| TBC1D10C | 1.911 | 24.54 |
| TBC1D12  | 5.843 | 0.09  |
| TBC1D13  | 3.778 | 4.61  |



|          |        |       |
|----------|--------|-------|
| TBC1D14  | 6.128  | 36.49 |
| TBC1D15  | 3.871  | 30.08 |
| TBC1D16  | 3.916  | 6.54  |
| TBC1D17  | 2.219  | 7.18  |
| TBC1D19  | 1.924  | 0.31  |
| TBC1D2   | 3.191  | 0.75  |
| TBC1D20  | 2.716  | 11.44 |
| TBC1D21  | 1.207  | 0     |
| TBC1D22A | 2.69   | 10.63 |
| TBC1D22B | 3.462  | 12.31 |
| TBC1D23  | 2.257  | 6.97  |
| TBC1D24  | 4.317  | 0.09  |
| TBC1D25  | 4.164  | 8.46  |
| TBC1D2B  | 5.877  | 1.97  |
| TBC1D3   | 2.063  | 0.19  |
| TBC1D3B  | 2.063  | 0     |
| TBC1D3C  | 2.11   | 0     |
| TBC1D3G  | 2.108  | 0     |
| TBC1D3I  | 1.964  | 0     |
| TBC1D3P1 | 9.376  | 0.01  |
| TBC1D3P2 | 10.497 | 0     |
| TBC1D4   | 5.922  | 1.75  |
| TBC1D5   | 6.804  | 3.93  |
| TBC1D7   | 1.127  | 3.6   |
| TBC1D8   | 3.966  | 7.46  |
| TBC1D8B  | 6.302  | 0.2   |
| TBC1D9   | 5.513  | 3.24  |
| TBC1D9B  | 5.167  | 10.59 |
| TBCA     | 0.951  | 23.93 |
| TBCAP1   | 0.557  | 14.92 |
| TBCAP2   | 0.468  | 1.48  |
| TBCAP3   | 0.432  | 1.15  |
| TBCB     | 1.475  | 11.14 |
| TBCC     | 1.575  | 16.59 |
| TBCCD1   | 2.41   | 1.56  |
| TBCD     | 6.272  | 14.15 |
| TBCE     | 1.867  | 3.6   |
| TBCEL    | 1.781  | 0.72  |
| TBK1     | 2.982  | 3.95  |
| TBKBP1   | 4.316  | 14.44 |
| TBL1X    | 5.866  | 3.12  |
| TBL1XR1  | 6.268  | 14.21 |
| TBL1Y    | 2.407  | 0     |
| TBL1YP   | 15.647 | 0.01  |
| TBL2     | 6.082  | 0.97  |
| TBL3     | 2.594  | 3.09  |
| TBN      | 2.503  | 14.83 |
| TBP      | 1.846  | 8.52  |
| TBPL1    | 1.319  | 3.6   |
| TBPL2    | 1.297  | 0     |

|            |        |       |
|------------|--------|-------|
| TBR1       | 3.186  | 0     |
| TBRG1      | 4.458  | 13.49 |
| TBRG4      | 4.604  | 4.44  |
| TBX1       | 2.809  | 0     |
| TBX10      | 1.548  | 0     |
| TBX15      | 3.495  | 0.03  |
| TBX18      | 4.07   | 0     |
| TBX19      | 2.822  | 0.77  |
| TBX2       | 3.38   | 0     |
| TBX20      | 1.81   | 0     |
| TBX21      | 2.572  | 6.08  |
| TBX22      | 2.248  | 0     |
| TBX3       | 4.783  | 0     |
| TBX4       | 2.47   | 0     |
| TBX5       | 4.673  | 0     |
| TBX6       | 3.169  | 0.41  |
| TBXA2R     | 2.442  | 7.54  |
| TBXAS1     | 4.242  | 0.59  |
| tcag7.1017 | 5.928  | 0.1   |
| tcag7.1196 | 1.471  | 11.63 |
| tcag7.1239 | 0.393  | 2.02  |
| tcag7.350  | 1.23   | 0.72  |
| tcag7.441  | 1.699  | 0.06  |
| tcag7.875  | 1.02   | 0     |
| tcag7.926  | 2.202  | 0.45  |
| TCAM1      | 10.651 | 0.01  |
| TCAP       | 0.963  | 17.26 |
| TCBA1      | 3.315  | 0     |
| TCEA1      | 2.777  | 9.66  |
| TCEA1P     | 2.472  | 0     |
| TCEA1P2    | 2.57   | 10.09 |
| TCEA2      | 2.425  | 3.92  |
| TCEA3      | 1.586  | 0.12  |
| TCEAL1     | 1.353  | 4.31  |
| TCEAL2     | 1.101  | 0.09  |
| TCEAL3     | 1.278  | 13.63 |
| TCEAL4     | 1.774  | 27.33 |
| TCEAL5     | 1.168  | 0.08  |
| TCEAL6     | 0.998  | 0.2   |
| TCEAL7     | 1.136  | 0     |
| TCEAL8     | 1.212  | 12.98 |
| TCEB1      | 0.655  | 22.2  |
| TCEB1P     | 1.83   | 3.35  |
| TCEB1P2    | 0.7    | 2.83  |
| TCEB2      | 1.29   | 23.55 |
| TCEB3      | 3.798  | 14.64 |
| TCEB3B     | 3.046  | 0     |
| TCEB3C     | 1.877  | 0     |
| TCERG1     | 4.201  | 13.71 |
| TCERG1L    | 2.619  | 0     |

|          |        |        |
|----------|--------|--------|
| TCF1     | 3.239  | 0.21   |
| TCF12    | 5.345  | 10.75  |
| TCF15    | 1.227  | 0      |
| TCF19    | 3.246  | 0.09   |
| TCF2     | 6.029  | 0      |
| TCF20    | 14.785 | 1.9    |
| TCF21    | 3.645  | 0      |
| TCF23    | 0.645  | 0      |
| TCF25    | 4.055  | 25.77  |
| TCF3     | 8.89   | 51.61  |
| TCF4     | 8.009  | 58.47  |
| TCF7     | 6.912  | 8.39   |
| TCF7L1   | 2.761  | 0.58   |
| TCF7L2   | 2.993  | 11.71  |
| TCFL5    | 2.456  | 1.61   |
| TCHHL1   | 3.603  | 0      |
| TCHP     | 3.151  | 3.32   |
| TCIRG1   | 3.282  | 41.18  |
| TCL1A    | 1.311  | 203.61 |
| TCL1B    | 2.453  | 20.37  |
| TCL6     | 9.997  | 0.48   |
| TCN1     | 1.543  | 1.02   |
| TCN2     | 1.981  | 1.2    |
| TCOF1    | 6.293  | 3.89   |
| TCP1     | 4.371  | 63.53  |
| TCP10    | 2.383  | 0      |
| TCP10L   | 0.957  | 0      |
| TCP10L2  | 1.543  | 0      |
| TCP11    | 1.962  | 0.51   |
| TCP11L1  | 2.405  | 2.43   |
| TCP11L2  | 3.736  | 29.45  |
| TCP1L2   | 2.01   | 0.2    |
| TCTA     | 2.146  | 12.91  |
| TCTE3    | 0.747  | 0.92   |
| TCTEX1D1 | 2.002  | 0.1    |
| TDG      | 3.22   | 4.27   |
| TDGF1    | 2.027  | 0      |
| TDGF3    | 2.71   | 0      |
| TDGF5    | 0.978  | 0.2    |
| TDH      | 30.173 | 0      |
| TDO2     | 1.693  | 0      |
| TDP1     | 3.747  | 1.3    |
| TDPX2    | 0.958  | 2.69   |
| TDRD1    | 4.51   | 0.09   |
| TDRD10   | 2.331  | 0      |
| TDRD3    | 2.461  | 2.82   |
| TDRD5    | 3.516  | 0      |
| TDRD6    | 6.817  | 0      |
| TDRD7    | 3.762  | 1.16   |
| TDRD9    | 3.338  | 0.06   |

|         |        |       |
|---------|--------|-------|
| TDRKH   | 2.318  | 0.12  |
| TEAD1   | 8.85   | 0.01  |
| TEAD2   | 2.164  | 0.68  |
| TEAD3   | 2.915  | 0.1   |
| TEAD4   | 2.151  | 1.33  |
| TEC     | 3.574  | 1.16  |
| TECT1   | 1.853  | 0.75  |
| TECTA   | 6.468  | 0     |
| TECTB   | 0.99   | 0     |
| TEDDM1  | 2.33   | 0     |
| TEF     | 4.364  | 0.28  |
| TEGT    | 2.58   | 61.05 |
| TEK     | 4.62   | 0.04  |
| TEKT1   | 1.413  | 0     |
| TEKT2   | 1.509  | 0.13  |
| TEKT3   | 1.696  | 0     |
| TEKT4   | 1.455  | 0     |
| TEKT5   | 1.609  | 0.12  |
| TELO2   | 3.719  | 9.73  |
| TENC1   | 5.372  | 2.92  |
| Tenr    | 1.961  | 0     |
| TEP1    | 8.595  | 3.68  |
| TEPP    | 1.021  | 0     |
| TERC    | 0.451  | 0.22  |
| TERF1   | 2.69   | 2.65  |
| TERF1P  | 2.959  | 0.07  |
| TERF2   | 3.541  | 16.99 |
| TERF2IP | 2.116  | 34.41 |
| TERT    | 4.872  | 0.22  |
| TES     | 5.588  | 0.62  |
| TESC    | 1.068  | 1.3   |
| TESK1   | 2.516  | 3.11  |
| TESK2   | 3.019  | 3.44  |
| TESSP1  | 1.112  | 0     |
| TESSP2  | 0.882  | 0     |
| TESSP5  | 0.783  | 0.12  |
| TETRA   | 1.944  | 27.59 |
| TEX10   | 3.024  | 3.31  |
| TEX101  | 1.565  | 0     |
| TEX11   | 3.198  | 0     |
| TEX12   | 1.144  | 0     |
| TEX13A  | 1.379  | 0     |
| TEX13B  | 1.248  | 0     |
| TEX14   | 4.927  | 0.2   |
| TEX15   | 10.112 | 0     |
| TEX2    | 5.09   | 1.36  |
| TEX261  | 3.367  | 9.16  |
| TEX264  | 2.526  | 13.04 |
| TEX9    | 1.414  | 0.07  |
| TF      | 2.318  | 0.38  |

|          |        |       |
|----------|--------|-------|
| TFAM     | 1.936  | 4.91  |
| TFAP2A   | 2.933  | 0.74  |
| TFAP2B   | 1.975  | 0     |
| TFAP2C   | 2.866  | 0     |
| TFAP2D   | 2.04   | 0     |
| TFAP2E   | 2.189  | 0.36  |
| TFAP4    | 2.14   | 0.78  |
| TFB1M    | 1.288  | 1.08  |
| TFB2M    | 1.781  | 4.84  |
| TFCP2    | 2.372  | 2.17  |
| TFCP2L1  | 4.913  | 0     |
| TFDP1    | 2.367  | 3.47  |
| TFDP2    | 3.461  | 10.35 |
| TFDP3    | 1.68   | 0.06  |
| TFE3     | 3.393  | 10.27 |
| TFEB     | 2.646  | 20.53 |
| TFEC     | 13.262 | 0.03  |
| TFF1     | 0.492  | 0     |
| TFF2     | 0.607  | 0     |
| TFF3     | 0.668  | 0     |
| TFG      | 2.204  | 20.47 |
| TFIP11   | 3.458  | 56.57 |
| TFPI     | 1.879  | 0.05  |
| TFPI2    | 2.346  | 0     |
| TFPT     | 1.069  | 7.4   |
| TFR2     | 5.748  | 1.56  |
| TFRC     | 5.012  | 7.23  |
| TG       | 8.453  | 0.08  |
| TGDS     | 1.902  | 1.04  |
| TGFA     | 4.089  | 0.03  |
| TGFB1    | 2.346  | 25.69 |
| TGFB111  | 1.802  | 3.02  |
| TGFB2    | 1.69   | 0     |
| TGFB3    | 2.58   | 2.45  |
| TGFB1    | 2.691  | 0.52  |
| TGFBR1   | 6.475  | 1.72  |
| TGFBR2   | 4.704  | 16.26 |
| TGFBR3   | 4.199  | 0.76  |
| TGFBRAP1 | 4.748  | 21.98 |
| TGIF1    | 3.633  | 11.33 |
| TGIF1P1  | 1.278  | 0.47  |
| TGIF2    | 3.393  | 12.6  |
| TGIF2LX  | 0.847  | 0     |
| TGIF2LY  | 0.861  | 0     |
| TGIF2P1  | 12.192 | 0.02  |
| TGM1     | 2.701  | 0.11  |
| TGM2     | 4.359  | 0.18  |
| TGM3     | 2.615  | 0     |
| TGM4     | 2.979  | 0     |
| TGM5     | 2.204  | 0     |

|        |        |       |
|--------|--------|-------|
| TGM6   | 2.292  | 0     |
| TGM7   | 2.312  | 0     |
| TGOLN2 | 6.316  | 31.22 |
| TGS1   | 3.782  | 4.55  |
| TH     | 2      | 0     |
| TH1L   | 3.083  | 24.49 |
| THA1P  | 1.555  | 0     |
| THADA  | 7.564  | 3.39  |
| THAP1  | 3.83   | 1.11  |
| THAP10 | 2.028  | 0     |
| THAP11 | 1.886  | 7.03  |
| THAP2  | 4.724  | 0.17  |
| THAP3  | 2.052  | 1.97  |
| THAP4  | 2.158  | 47.86 |
| THAP5  | 3.136  | 0.38  |
| THAP6  | 3.547  | 0.98  |
| THAP7  | 2.209  | 2.37  |
| THAP8  | 1.825  | 0.16  |
| THAP9  | 4.613  | 4.47  |
| THBD   | 4.032  | 0.39  |
| THBS1  | 5.79   | 32.01 |
| THBS2  | 5.809  | 0     |
| THBS3  | 3.147  | 5.97  |
| THBS4  | 3.355  | 0.53  |
| THEG   | 1.322  | 0     |
| THEM2  | 0.739  | 2.41  |
| THEM4  | 3.783  | 0     |
| THEM5  | 2.456  | 0     |
| THEX1  | 2.119  | 0.37  |
| THG1L  | 1.305  | 3.72  |
| THNSL1 | 2.551  | 0     |
| THOC1  | 2.081  | 12.55 |
| THOC2  | 5.191  | 12.64 |
| THOC3  | 1.563  | 15.89 |
| THOC4  | 1.088  | 18.55 |
| THOC5  | 2.754  | 5.89  |
| THOC6  | 1.354  | 2.12  |
| THOC7  | 0.92   | 11.83 |
| THOP1  | 2.55   | 8.35  |
| THPO   | 3.009  | 0     |
| THRA   | 5.185  | 8.03  |
| THRAP1 | 7.834  | 13.73 |
| THRAP2 | 11.353 | 42.72 |
| THRAP3 | 4.4    | 44.95 |
| THRAP4 | 3.978  | 15.35 |
| THRAP5 | 2.924  | 3.28  |
| THRAP6 | 0.907  | 14.62 |
| THRB   | 6.341  | 0     |
| THRSP  | 1.174  | 0     |
| THSD1  | 3.039  | 1.17  |

|          |        |       |
|----------|--------|-------|
| THSD1P   | 30.249 | 1.79  |
| THSD3    | 5.171  | 0.2   |
| THSD4    | 9.145  | 0     |
| THSD7A   | 12.77  | 0.04  |
| THSD7B   | 5.846  | 0     |
| THTPA    | 2.132  | 3.48  |
| THUMPD1  | 4.416  | 7.84  |
| THUMPD2  | 2.474  | 15.63 |
| THUMPD3  | 2.898  | 5.29  |
| THY1     | 1.772  | 0.22  |
| THYN1    | 1.769  | 5.48  |
| TIA1     | 2.564  | 16.91 |
| TIAF1    | 2.089  | 34.25 |
| TIAL1    | 4.301  | 23.81 |
| TIAM1    | 5.453  | 0.36  |
| TIAM2    | 6.224  | 12    |
| TICAM1   | 4.115  | 0.99  |
| TICAM2   | 3.453  | 1     |
| TIE1     | 3.882  | 2.37  |
| TIFA     | 3.073  | 6.35  |
| TIFAB    | 1.413  | 0     |
| TIGD1    | 2.448  | 3.07  |
| TIGD2    | 2.072  | 1.15  |
| TIGD3    | 1.823  | 0.05  |
| TIGD4    | 2.433  | 0     |
| TIGD5    | 2.264  | 0.83  |
| TIGD6    | 3.493  | 0.48  |
| TIGD7    | 2.569  | 2.66  |
| TIMD4    | 1.292  | 0     |
| TIMELESS | 4.354  | 1.75  |
| TIMM10   | 0.674  | 11.45 |
| TIMM13   | 2.369  | 11.82 |
| TIMM17A  | 1.63   | 6.19  |
| TIMM17B  | 0.948  | 9.39  |
| TIMM22   | 1.69   | 5.8   |
| TIMM23   | 1.715  | 26.31 |
| TIMM44   | 2.158  | 10.27 |
| TIMM50   | 2.572  | 4.31  |
| TIMM8A   | 1.166  | 2.12  |
| TIMM8B   | 0.414  | 9.56  |
| TIMM9    | 1.078  | 15.79 |
| TIMP1    | 0.916  | 23.22 |
| TIMP2    | 3.655  | 21.22 |
| TIMP3    | 5.486  | 19.4  |
| TIMP4    | 1.429  | 0     |
| TINAG    | 1.767  | 0     |
| TINAGL1  | 2.163  | 1.96  |
| TINF2    | 2.095  | 9.02  |
| TINP1    | 1.104  | 52.87 |
| TIP39    | 0.459  | 0.21  |

|           |       |         |
|-----------|-------|---------|
| TIPARP    | 3.836 | 6.4     |
| TIPIN     | 1.054 | 1.22    |
| TIPRL     | 3.22  | 2.67    |
| TIRAP     | 3.217 | 0.25    |
| TITF1     | 2.338 | 0       |
| TJAP1     | 2.72  | 9.6     |
| TJP1      | 7.165 | 0       |
| TJP2      | 6.041 | 20.41   |
| TJP3      | 2.859 | 0.04    |
| TK1       | 1.42  | 3.9     |
| TK2       | 3.675 | 9.05    |
| TKT       | 1.98  | 173.84  |
| TKTL1     | 2.515 | 0.04    |
| TKTL2     | 2.739 | 0       |
| TLCD1     | 1.007 | 0.29    |
| TLE1      | 3.892 | 47.31   |
| TLE2      | 2.562 | 0.12    |
| TLE3      | 2.357 | 4.95    |
| TLE4      | 7.439 | 24.84   |
| TLE6      | 1.976 | 0       |
| TLK1      | 4.045 | 7.22    |
| TLK2      | 3.604 | 8.32    |
| TLL1      | 6.654 | 0       |
| TLL2      | 6.753 | 0.02    |
| TLN1      | 8.17  | 15.01   |
| TLN2      | 8.5   | 0.06    |
| TLOC1     | 0.1   | 1018.07 |
| TLR1      | 2.851 | 5.48    |
| TLR10     | 3.594 | 0.41    |
| TLR2      | 3.403 | 3.37    |
| TLR3      | 3.041 | 0       |
| TLR4      | 5.503 | 2.83    |
| TLR5      | 3.368 | 0       |
| TLR6      | 2.753 | 1.26    |
| TLR7      | 4.992 | 0.02    |
| TLR7-like | 3.281 | 0.03    |
| TLR8      | 4.542 | 0.42    |
| TLR9      | 3.868 | 0.2     |
| TLX1      | 2.906 | 0       |
| TLX2      | 1.752 | 0       |
| TLX3      | 1.493 | 0       |
| TM2D1     | 1.25  | 1.26    |
| TM2D2     | 4.333 | 1.89    |
| TM2D3     | 1.407 | 7.87    |
| TM4SF1    | 1.691 | 2.04    |
| TM4SF18   | 1.153 | 0       |
| TM4SF19   | 0.961 | 0.83    |
| TM4SF20   | 2.294 | 0       |
| TM4SF4    | 1.428 | 0       |
| TM4SF5    | 0.708 | 0       |



|         |         |       |
|---------|---------|-------|
| TM6SF1  | 1.418   | 0     |
| TM6SF2  | 2.61    | 0     |
| TM7SF2  | 2.094   | 2.65  |
| TM7SF3  | 2.525   | 3.14  |
| TM7SF4  | 1.952   | 0     |
| TM9SF1  | 3.053   | 2.76  |
| TM9SF2  | 2.591   | 23.18 |
| TM9SF3  | 4.996   | 25.77 |
| TM9SF4  | 3.727   | 10.25 |
| TMBIM1  | 2.349   | 46.96 |
| TMBIM4  | 1.298   | 3.81  |
| TMC1    | 3.201   | 0     |
| TMC2    | 3.169   | 0     |
| TMC3    | 3.303   | 0     |
| TMC4    | 2.358   | 0.12  |
| TMC5    | 3.33    | 0.06  |
| TMC6    | 5.414   | 36.71 |
| TMC7    | 3.569   | 0     |
| TMC8    | 3.561   | 20.67 |
| TMCC1   | 6.99    | 2.31  |
| TMCC2   | 3.792   | 1.01  |
| TMCC3   | 4.726   | 0.92  |
| TMCO1   | 1.42    | 3.41  |
| TMCO2   | 0.739   | 0     |
| TMCO3   | 3.047   | 9.09  |
| TMCO4   | 2.947   | 4.84  |
| TMCO5   | 1.158   | 0     |
| TMCO6   | 1.889   | 2.1   |
| TMCO7   | 1.839   | 0.16  |
| TMDCII  | 104.716 | 0     |
| TMED1   | 1.357   | 3.8   |
| TMED10  | 4.085   | 19.42 |
| TMED10P | 1.273   | 5.44  |
| TMED2   | 2.039   | 21.3  |
| TMED3   | 1.388   | 8.83  |
| TMED4   | 2.769   | 20.91 |
| TMED5   | 3.953   | 3.75  |
| TMED6   | 0.906   | 4.04  |
| TMED7   | 3.585   | 4.83  |
| TMED8   | 1.291   | 4.98  |
| TMED9   | 1.402   | 45.52 |
| TMEFF1  | 2.285   | 0.04  |
| TMEFF2  | 1.813   | 0     |
| TMEM1   | 7.77    | 7.74  |
| TMEM10  | 4.071   | 0.12  |
| TMEM100 | 1.67    | 3.32  |
| TMEM101 | 1.539   | 5.01  |
| TMEM102 | 1.973   | 0.65  |
| TMEM103 | 1.349   | 3.88  |
| TMEM104 | 3.876   | 7.61  |

|          |       |       |
|----------|-------|-------|
| TMEM105  | 3.317 | 0     |
| TMEM106A | 2.795 | 3.29  |
| TMEM106B | 12.87 | 0.44  |
| TMEM106C | 1.43  | 8.3   |
| TMEM107  | 1.722 | 1.09  |
| TMEM108  | 2.148 | 0     |
| TMEM109  | 2.082 | 23    |
| TMEM11   | 1.193 | 15.09 |
| TMEM110  | 4.966 | 16.93 |
| TMEM111  | 1.082 | 17.83 |
| TMEM112  | 2.6   | 6.74  |
| TMEM112B | 2.658 | 19.14 |
| TMEM113  | 3.326 | 27.43 |
| TMEM115  | 2.095 | 13.7  |
| TMEM116  | 1.716 | 0.17  |
| TMEM117  | 2.697 | 0.04  |
| TMEM118  | 1.761 | 0.17  |
| TMEM119  | 2.586 | 0.2   |
| TMEM121  | 1.519 | 0.33  |
| TMEM123  | 3.321 | 61.58 |
| TMEM125  | 1.639 | 0.06  |
| TMEM126A | 0.726 | 11.18 |
| TMEM126B | 1.12  | 2.29  |
| TMEM127  | 4.208 | 19.79 |
| TMEM128  | 1.732 | 1.6   |
| TMEM129  | 3.086 | 15.87 |
| TMEM130  | 5.988 | 0     |
| TMEM131  | 6.257 | 4.76  |
| TMEM132A | 3.716 | 0.05  |
| TMEM132B | 7.578 | 0     |
| TMEM132C | 5.271 | 0     |
| TMEM132D | 5.778 | 0     |
| TMEM132E | 4.369 | 0     |
| TMEM133  | 1.856 | 0.11  |
| TMEM134  | 0.945 | 5.24  |
| TMEM135  | 3.597 | 1.26  |
| TMEM136  | 0.886 | 0.12  |
| TMEM137  | 1.989 | 1.3   |
| TMEM138  | 1.162 | 12.6  |
| TMEM139  | 4.726 | 0.02  |
| TMEM140  | 3.36  | 5.18  |
| TMEM141  | 0.768 | 8.89  |
| TMEM142A | 1.475 | 18.31 |
| TMEM142B | 5.056 | 2.7   |
| TMEM142C | 2.178 | 4.31  |
| TMEM143  | 2.249 | 0.97  |
| TMEM144  | 3.043 | 0.36  |
| TMEM145  | 1.768 | 0.12  |
| TMEM146  | 2.513 | 0.04  |
| TMEM147  | 0.851 | 13.48 |

|          |       |       |
|----------|-------|-------|
| TMEM148  | 1.787 | 0     |
| TMEM149  | 1.196 | 2.23  |
| TMEM14A  | 0.994 | 0.8   |
| TMEM14B  | 0.917 | 11.87 |
| TMEM14C  | 0.983 | 10.67 |
| TMEM150  | 2.361 | 3.86  |
| TMEM151  | 2.562 | 0     |
| TMEM154  | 3.085 | 1.76  |
| TMEM155  | 2.026 | 0.14  |
| TMEM156  | 2.276 | 21.17 |
| TMEM157  | 1.236 | 1.6   |
| TMEM158  | 1.797 | 0.11  |
| TMEM159  | 1.812 | 2.02  |
| TMEM160  | 0.655 | 6.65  |
| TMEM161A | 1.779 | 1.28  |
| TMEM161B | 2.589 | 2.14  |
| TMEM162  | 1.179 | 0     |
| TMEM163  | 3.371 | 9.8   |
| TMEM164  | 1.308 | 1.06  |
| TMEM165  | 2.196 | 7.62  |
| TMEM166  | 1.815 | 0     |
| TMEM167  | 2.075 | 8.44  |
| TMEM168  | 7.842 | 1.08  |
| TMEM169  | 3.306 | 0     |
| TMEM16A  | 4.474 | 0.02  |
| TMEM16B  | 3.717 | 0.29  |
| TMEM16C  | 6.642 | 0     |
| TMEM16D  | 3.898 | 0     |
| TMEM16E  | 3.147 | 0     |
| TMEM16F  | 5.973 | 3.38  |
| TMEM16G  | 3.767 | 0     |
| TMEM16H  | 4.389 | 3.65  |
| TMEM16J  | 2.814 | 0.45  |
| TMEM16K  | 2.734 | 1.63  |
| TMEM17   | 1.405 | 0.49  |
| TMEM170  | 1.06  | 1.59  |
| TMEM171  | 1.249 | 0     |
| TMEM173  | 1.688 | 18.28 |
| TMEM174  | 1.322 | 0     |
| TMEM175  | 2.025 | 17.39 |
| TMEM176A | 2.076 | 0.48  |
| TMEM176B | 2.662 | 0.52  |
| TMEM177  | 1.385 | 0.92  |
| TMEM178  | 1.631 | 6.55  |
| TMEM179  | 1.623 | 0     |
| TMEM18   | 2.124 | 7.18  |
| TMEM180  | 2.834 | 0.56  |
| TMEM181  | 5.59  | 2.85  |
| TMEM182  | 3.275 | 0.03  |
| TMEM183A | 2.711 | 14.23 |

|          |        |       |
|----------|--------|-------|
| TMEM183B | 1.706  | 9.17  |
| TMEM185A | 2.821  | 0.32  |
| TMEM185B | 2.131  | 5.94  |
| TMEM186  | 1.149  | 1.47  |
| TMEM19   | 4.659  | 1.04  |
| TMEM2    | 12.395 | 94.55 |
| TMEM20   | 2.399  | 0     |
| TMEM22   | 1.939  | 0.87  |
| TMEM23   | 3.753  | 0.74  |
| TMEM24   | 3.344  | 2.34  |
| TMEM25   | 2.409  | 0.82  |
| TMEM26   | 5.148  | 0     |
| TMEM27   | 1.568  | 0     |
| TMEM28   | 4.019  | 0     |
| TMEM29   | 2.251  | 9.76  |
| TMEM30A  | 4.402  | 10.94 |
| TMEM30B  | 3.033  | 0.06  |
| TMEM30C  | 1.062  | 0     |
| TMEM31   | 0.732  | 0     |
| TMEM32   | 3.648  | 8.49  |
| TMEM33   | 2.937  | 6.34  |
| TMEM34   | 2.914  | 3.8   |
| TMEM35   | 2.041  | 0     |
| TMEM37   | 0.573  | 0.17  |
| TMEM38A  | 1.639  | 0.06  |
| TMEM38B  | 2.076  | 2.05  |
| TMEM39A  | 2.957  | 8.17  |
| TMEM39B  | 2.124  | 6.71  |
| TMEM4    | 1.209  | 10.39 |
| TMEM40   | 1.71   | 0.06  |
| TMEM41A  | 1.389  | 3.49  |
| TMEM41B  | 1.8    | 8.35  |
| TMEM42   | 0.973  | 3.46  |
| TMEM43   | 3.236  | 6.39  |
| TMEM44   | 2.345  | 2.66  |
| TMEM45A  | 1.564  | 0     |
| TMEM45B  | 2.207  | 0     |
| TMEM46   | 6.063  | 54.77 |
| TMEM47   | 4.054  | 0     |
| TMEM48   | 2.521  | 1.49  |
| TMEM49   | 2.509  | 5.13  |
| TMEM5    | 1.451  | 1.23  |
| TMEM50A  | 2.28   | 25.78 |
| TMEM50B  | 2.332  | 7.72  |
| TMEM51   | 1.81   | 0     |
| TMEM52   | 0.922  | 0     |
| TMEM53   | 1.6    | 0.37  |
| TMEM54   | 0.993  | 0.1   |
| TMEM55A  | 2.254  | 1.4   |
| TMEM55B  | 2.781  | 35.33 |

|         |       |        |
|---------|-------|--------|
| TMEM56  | 2.443 | 0      |
| TMEM57  | 3.138 | 24.27  |
| TMEM58  | 1.138 | 0.35   |
| TMEM59  | 1.696 | 29.63  |
| TMEM60  | 1.746 | 1.41   |
| TMEM61  | 1.097 | 0      |
| TMEM62  | 2.769 | 7.29   |
| TMEM63A | 4.521 | 12.35  |
| TMEM63B | 3.199 | 6.52   |
| TMEM63C | 5.334 | 2.06   |
| TMEM64  | 1.551 | 1.02   |
| TMEM65  | 3.228 | 0.68   |
| TMEM66  | 2.614 | 157.87 |
| TMEM67  | 3.453 | 0.17   |
| TMEM68  | 2.317 | 0.76   |
| TMEM69  | 1.6   | 8.16   |
| TMEM70  | 2.028 | 8.49   |
| TMEM71  | 1.993 | 0.25   |
| TMEM74  | 2.087 | 0      |
| TMEM75  | 2.165 | 0.04   |
| TMEM77  | 1.759 | 9.73   |
| TMEM78  | 2.175 | 0.09   |
| TMEM79  | 2.156 | 0.6    |
| TMEM8   | 2.53  | 4.14   |
| TMEM80  | 1.572 | 5.35   |
| TMEM81  | 1.332 | 0.29   |
| TMEM83  | 1.786 | 0      |
| TMEM85  | 1.881 | 34.25  |
| TMEM86A | 3.582 | 4.47   |
| TMEM86B | 1.641 | 2.9    |
| TMEM87A | 2.875 | 14.93  |
| TMEM87B | 2.933 | 1.72   |
| TMEM88  | 0.874 | 0.22   |
| TMEM89  | 0.48  | 0      |
| TMEM9   | 1.527 | 7.84   |
| TMEM92  | 2.685 | 0.55   |
| TMEM93  | 0.892 | 19.74  |
| TMEM95  | 1.169 | 0      |
| TMEM97  | 2.115 | 1.03   |
| TMEM98  | 1.795 | 0      |
| TMEM99  | 0.855 | 1.04   |
| TMEM9B  | 1.753 | 7.06   |
| TMEPAI  | 5.444 | 0.07   |
| TMF1    | 3.282 | 17.37  |
| TMIE    | 1.649 | 0      |
| TMIGD1  | 1.201 | 0      |
| TMIGD2  | 1.262 | 0.23   |
| TMLHE   | 2.835 | 2.51   |
| TMOD1   | 2.664 | 1.64   |
| TMOD2   | 2.917 | 0.2    |

|           |        |         |
|-----------|--------|---------|
| TMOD3     | 2.443  | 5.23    |
| TMOD4     | 1.201  | 0.17    |
| TMPIT     | 2.56   | 2.28    |
| TMPO      | 4.626  | 4.68    |
| TMPRSS11A | 2.428  | 0       |
| TMPRSS11B | 2.642  | 0       |
| TMPRSS11D | 2.783  | 0       |
| TMPRSS11E | 2.103  | 0       |
| TMPRSS11F | 2.077  | 0       |
| TMPRSS12  | 1.451  | 0       |
| TMPRSS13  | 3.263  | 0.12    |
| TMPRSS2   | 3.194  | 0       |
| TMPRSS3   | 3.603  | 0.05    |
| TMPRSS4   | 2.846  | 0       |
| TMPRSS5   | 2.232  | 0.93    |
| TMPRSS6   | 3.191  | 0.19    |
| TMPRSS7   | 2.717  | 0       |
| TMPRSS9   | 3.18   | 0.16    |
| TMSB10    | 0.482  | 1338.53 |
| TMSB4X    | 1.389  | 150.43  |
| TMSB4Y    | 1.669  | 1.48    |
| TMSL1     | 0.547  | 0.54    |
| TMSL2     | 0.538  | 1.29    |
| TMSL3     | 0.634  | 30.27   |
| TMSL4     | 0.54   | 3.85    |
| TMSL5     | 0.438  | 1.13    |
| TMSL7     | 0.482  | 0       |
| TMSL8     | 0.666  | 0.15    |
| TMTC1     | 8.821  | 0       |
| TMTC2     | 4.84   | 0.16    |
| TMTC3     | 4.971  | 0.32    |
| TMTC4     | 2.624  | 1.17    |
| TMUB1     | 2.944  | 7.79    |
| TMUB2     | 7.444  | 22.29   |
| TNC       | 7.544  | 0       |
| TncRNA    | 16.886 | 198.1   |
| TNF       | 5.007  | 0       |
| TNFAIP1   | 3.569  | 8.2     |
| TNFAIP2   | 4.175  | 16.3    |
| TNFAIP3   | 4.809  | 85.67   |
| TNFAIP6   | 1.423  | 0       |
| TNFAIP8   | 1.99   | 1.84    |
| TNFAIP8L1 | 2.187  | 2.85    |
| TNFAIP8L2 | 1.152  | 2.92    |
| TNFAIP8L3 | 2.259  | 1.23    |
| TNFRSF10A | 1.709  | 3.64    |
| TNFRSF10B | 4.331  | 15.46   |
| TNFRSF10C | 1.387  | 0.64    |
| TNFRSF10D | 3.535  | 6.41    |
| TNFRSF11A | 3.126  | 2.63    |

|                 |       |       |
|-----------------|-------|-------|
| TNFRSF11B       | 2.274 | 0     |
| TNFRSF12A       | 0.986 | 0.6   |
| TNFRSF13B       | 1.358 | 0.58  |
| TNFRSF13C       | 0.895 | 22.99 |
| TNFRSF14        | 3.566 | 44.45 |
| TNFRSF17        | 0.994 | 0     |
| TNFRSF18        | 1.835 | 0.05  |
| TNFRSF19        | 4.878 | 0     |
| TNFRSF19L       | 7.93  | 12.59 |
| TNFRSF1A        | 2.204 | 25.22 |
| TNFRSF1B        | 3.675 | 14.11 |
| TNFRSF21        | 3.634 | 34.63 |
| TNFRSF25        | 2.086 | 1.18  |
| TNFRSF4         | 1.068 | 0.19  |
| TNFRSF6B        | 1.558 | 5.21  |
| TNFRSF8         | 4.046 | 0.03  |
| TNFRSF9         | 1.884 | 0.05  |
| TNFSF10         | 1.759 | 1.74  |
| TNFSF11         | 2.279 | 0     |
| TNFSF12         | 1.386 | 2.28  |
| TNFSF12-TNFSF13 | 1.823 | 2.87  |
| TNFSF13         | 2.959 | 2.64  |
| TNFSF13B        | 1.204 | 0     |
| TNFSF14         | 1.593 | 0.19  |
| TNFSF15         | 2.004 | 0     |
| TNFSF18         | 0.61  | 0     |
| TNFSF4          | 3.663 | 19.29 |
| TNFSF5IP1       | 1.684 | 18.16 |
| TNFSF8          | 2.323 | 11.15 |
| TNFSF9          | 1.632 | 0.12  |
| TNIK            | 4.083 | 0     |
| TNIP1           | 2.913 | 32.71 |
| TNIP2           | 1.932 | 7.93  |
| TNIP3           | 2.393 | 0     |
| TNK1            | 2.769 | 0.71  |
| TNK2            | 5.287 | 34.43 |
| TNKS            | 9.599 | 3.5   |
| TNKS1BP1        | 5.952 | 0.76  |
| TNKS2           | 6.156 | 11.85 |
| TNMD            | 1.304 | 0     |
| TNN             | 5.008 | 0.04  |
| TNNC1           | 0.686 | 0     |
| TNNC2           | 0.683 | 0.29  |
| TNNI1           | 6.143 | 0     |
| TNNI2           | 0.7   | 1.13  |
| TNNI3           | 0.786 | 0     |
| TNNI3K          | 3.001 | 0.13  |
| TNNT1           | 0.98  | 0.1   |
| TNNT2           | 1.168 | 0     |
| TNNT3           | 1.001 | 0.39  |

|          |        |       |
|----------|--------|-------|
| TNP1     | 0.402  | 0     |
| TNP2     | 0.597  | 0     |
| TNPO1    | 3.384  | 4.85  |
| TNPO2    | 4.871  | 11.33 |
| TNPO3    | 7.636  | 5.11  |
| TNR      | 4.716  | 0     |
| TNRC15   | 5.959  | 10.77 |
| TNRC18   | 5.7    | 0.03  |
| TNRC4    | 3.297  | 0.03  |
| TNRC5    | 3.432  | 24.48 |
| TNRC6A   | 10.143 | 4.42  |
| TNRC6B   | 18.507 | 3.91  |
| TNRC6C   | 5.318  | 1.67  |
| TNRC9    | 5.328  | 0     |
| TNS1     | 7.506  | 3.36  |
| TNS3     | 15.254 | 1.08  |
| TNS4     | 4.013  | 0     |
| TNT      | 2.463  | 0     |
| TNXA     | 5.686  | 0     |
| TNXB     | 31.907 | 0.02  |
| TOB1     | 1.83   | 7.46  |
| TOB2     | 4.565  | 14.04 |
| TOE1     | 2.116  | 5.42  |
| TOLLIP   | 3.604  | 4.67  |
| TOM1     | 2.311  | 6.93  |
| TOM1L1   | 2.17   | 0     |
| TOM1L2   | 2.944  | 1.18  |
| TOMM20   | 3.258  | 43.97 |
| TOMM22   | 1.378  | 44.94 |
| TOMM34   | 2.049  | 4.3   |
| TOMM40   | 2.299  | 12.48 |
| TOMM40L  | 2.679  | 1.33  |
| TOMM7    | 1.458  | 93.44 |
| TOMM70A  | 4.36   | 5.68  |
| TOP1     | 4.895  | 29.65 |
| TOP1MT   | 1.91   | 17.4  |
| TOP1P1   | 2.431  | 4.64  |
| TOP1P2   | 1.521  | 0.2   |
| TOP2A    | 5.698  | 1.46  |
| TOP2B    | 8.431  | 67.57 |
| TOP3A    | 4.116  | 1.73  |
| TOP3B    | 3.107  | 8.06  |
| TOP3B2   | 0.48   | 1.03  |
| TOPBP1   | 5.261  | 7.03  |
| TOPORS   | 4.148  | 3.88  |
| TOR1A    | 2.106  | 4.23  |
| TOR1AIP1 | 3.807  | 8.11  |
| TOR1AIP2 | 5.052  | 23.56 |
| TOR1B    | 2.769  | 1.75  |
| TOR2A    | 2.467  | 1.32  |



|          |         |         |
|----------|---------|---------|
| TOR3A    | 2.249   | 11.3    |
| TOX      | 4.131   | 2.2     |
| TP53     | 2.621   | 4.53    |
| TP53BP1  | 6.27    | 3.52    |
| TP53BP2  | 5.682   | 34.93   |
| TP53I11  | 2.656   | 4.4     |
| TP53I13  | 1.643   | 14.63   |
| TP53I3   | 1.878   | 5.27    |
| TP53INP1 | 5.589   | 582.03  |
| TP53INP2 | 4.124   | 12.11   |
| TP53RK   | 3.373   | 0.85    |
| TP53TG3  | 2.034   | 0       |
| TP73     | 2.234   | 0.18    |
| TP73L    | 4.906   | 0       |
| TPBG     | 2.376   | 18.66   |
| TPCN1    | 3.114   | 4.48    |
| TPCN2    | 2.931   | 3.44    |
| TPD52    | 4.491   | 7.31    |
| TPD52L1  | 2.41    | 0       |
| TPD52L2  | 6.246   | 26.88   |
| TPD52L3  | 4.077   | 0       |
| TPH1     | 1.335   | 0.15    |
| TPH2     | 2.36    | 0       |
| TPI1     | 1.22    | 28.46   |
| TPK1     | 4.834   | 0.13    |
| TPM1     | 3.627   | 0.3     |
| TPM2     | 2.621   | 40.47   |
| TPM3     | 4.401   | 35.13   |
| TPM4     | 6.324   | 60.88   |
| TPM5P    | 1.034   | 0.19    |
| TPMT     | 3.25    | 0.22    |
| TPMTP1   | 0.741   | 0.27    |
| TPO      | 4.638   | 3.99    |
| TPP1     | 3.498   | 33.54   |
| TPP2     | 4.871   | 14.36   |
| TPPP     | 5.019   | 2.2     |
| TPR      | 7.492   | 10.06   |
| TPRKB    | 1.094   | 13.3    |
| TPRX1    | 1.839   | 0       |
| TPRX1P2  | 0.925   | 0       |
| TPRX2P   | 1.909   | 0       |
| TPRXL    | 130.743 | 0.01    |
| TPSAB1   | 1.194   | 0.16    |
| TPSB2    | 1.166   | 0.08    |
| TPSD1    | 0.855   | 0       |
| TPSG1    | 1.105   | 0       |
| TPST1    | 4.878   | 13.25   |
| TPST2    | 2.075   | 29.94   |
| TPT1     | 1.24    | 4142.27 |
| TPTE     | 2.836   | 0       |

|          |       |        |
|----------|-------|--------|
| TPTE2    | 2.212 | 0      |
| TPX2     | 3.662 | 3.11   |
| TR2IT1   | 1.134 | 0      |
| TRA@     | 0.1   | 0      |
| TRA16    | 1.299 | 1.45   |
| TRA2A    | 6.21  | 42.27  |
| TRABD    | 4.237 | 119.84 |
| TRAC     | 0.954 | 4.98   |
| TRADD    | 2.44  | 1.09   |
| TRAF1    | 4.449 | 1.4    |
| TRAF2    | 2.277 | 2.87   |
| TRAF3    | 2.567 | 3.81   |
| TRAF3IP1 | 2.535 | 0.9    |
| TRAF3IP2 | 3.546 | 31.55  |
| TRAF3IP3 | 2.058 | 3.75   |
| TRAF4    | 2.135 | 5.7    |
| TRAF5    | 4.09  | 3.48   |
| TRAF6    | 3.004 | 10.7   |
| TRAF7    | 5.49  | 6.68   |
| TRAFD1   | 2.62  | 11.03  |
| TRAIP    | 2.024 | 0.98   |
| TRAJ1    | 0.1   | 0      |
| TRAJ10   | 0.1   | 0      |
| TRAJ11   | 0.1   | 0      |
| TRAJ12   | 0.1   | 0      |
| TRAJ13   | 0.1   | 0      |
| TRAJ14   | 0.1   | 0      |
| TRAJ15   | 0.1   | 0      |
| TRAJ16   | 0.1   | 0      |
| TRAJ17   | 0.1   | 0      |
| TRAJ18   | 0.1   | 0      |
| TRAJ19   | 0.1   | 0      |
| TRAJ2    | 0.1   | 0      |
| TRAJ20   | 0.1   | 0      |
| TRAJ21   | 0.1   | 0      |
| TRAJ22   | 0.1   | 0      |
| TRAJ23   | 0.1   | 0      |
| TRAJ24   | 0.1   | 0      |
| TRAJ25   | 0.1   | 0      |
| TRAJ26   | 0.1   | 0      |
| TRAJ27   | 0.1   | 0      |
| TRAJ28   | 0.1   | 0      |
| TRAJ29   | 0.1   | 0      |
| TRAJ3    | 0.1   | 0      |
| TRAJ30   | 0.1   | 0      |
| TRAJ31   | 0.1   | 0      |
| TRAJ32   | 0.1   | 0      |
| TRAJ33   | 0.1   | 0      |
| TRAJ34   | 0.1   | 0      |
| TRAJ35   | 0.1   | 0      |

|          |       |       |
|----------|-------|-------|
| TRAJ36   | 0.1   | 0     |
| TRAJ37   | 0.1   | 0     |
| TRAJ38   | 0.1   | 0     |
| TRAJ39   | 0.1   | 0     |
| TRAJ4    | 0.1   | 0     |
| TRAJ40   | 0.1   | 0     |
| TRAJ41   | 0.1   | 0     |
| TRAJ42   | 0.1   | 0     |
| TRAJ43   | 0.1   | 0     |
| TRAJ44   | 0.1   | 0     |
| TRAJ45   | 0.1   | 0     |
| TRAJ46   | 0.1   | 0     |
| TRAJ47   | 0.1   | 0     |
| TRAJ48   | 0.1   | 0     |
| TRAJ49   | 0.1   | 0     |
| TRAJ5    | 0.1   | 0.99  |
| TRAJ50   | 0.1   | 0     |
| TRAJ51   | 0.1   | 0     |
| TRAJ52   | 0.1   | 0     |
| TRAJ53   | 0.1   | 0     |
| TRAJ54   | 0.1   | 0     |
| TRAJ55   | 0.1   | 0     |
| TRAJ56   | 0.1   | 0     |
| TRAJ57   | 0.1   | 0     |
| TRAJ58   | 0.1   | 0     |
| TRAJ59   | 0.1   | 0     |
| TRAJ6    | 0.1   | 0     |
| TRAJ60   | 0.1   | 0     |
| TRAJ61   | 0.1   | 0     |
| TRAJ7    | 0.1   | 0     |
| TRAJ8    | 0.1   | 0     |
| TRAJ9    | 0.1   | 0     |
| TRAK1    | 5.95  | 16.78 |
| TRAK2    | 6.462 | 23.81 |
| TRAM1    | 2.789 | 16.67 |
| TRAM1L1  | 2.023 | 0.44  |
| TRAM2    | 7.057 | 8.03  |
| TRAP1    | 2.211 | 12.4  |
| TRAPPC1  | 0.813 | 17.28 |
| TRAPPC2  | 2.833 | 6.04  |
| TRAPPC2L | 0.629 | 11.32 |
| TRAPPC3  | 1.262 | 14.66 |
| TRAPPC4  | 1.198 | 12.64 |
| TRAPPC6A | 0.795 | 22.77 |
| TRAPPC6B | 3.151 | 3.58  |
| TRAT1    | 1.695 | 0.23  |
| TRAV10   | 0.343 | 0     |
| TRAV11   | 0.871 | 0     |
| TRAV1-1  | 0.326 | 0     |
| TRAV1-2  | 0.326 | 0     |

|             |       |      |
|-------------|-------|------|
| TRAV12-1    | 0.337 | 0.29 |
| TRAV12-2    | 0.343 | 0    |
| TRAV12-3    | 0.343 | 0    |
| TRAV13-1    | 0.337 | 0    |
| TRAV13-2    | 0.34  | 0    |
| TRAV14DV4   | 0.35  | 0    |
| TRAV15      | 0.888 | 0    |
| TRAV16      | 0.329 | 0    |
| TRAV17      | 0.337 | 0    |
| TRAV18      | 0.335 | 0    |
| TRAV19      | 0.35  | 0.28 |
| TRAV2       | 0.338 | 0    |
| TRAV20      | 0.337 | 0    |
| TRAV21      | 0.336 | 0.88 |
| TRAV22      | 0.331 | 0    |
| TRAV23DV6   | 0.364 | 0    |
| TRAV24      | 0.343 | 0    |
| TRAV25      | 0.327 | 0    |
| TRAV26-1    | 0.328 | 0    |
| TRAV26-2    | 0.327 | 0    |
| TRAV27      | 0.328 | 0    |
| TRAV28      | 0.883 | 0    |
| TRAV29DV5   | 0.358 | 0    |
| TRAV3       | 0.343 | 0.58 |
| TRAV30      | 0.337 | 0    |
| TRAV31      | 0.934 | 0    |
| TRAV32      | 0.844 | 0    |
| TRAV33      | 0.896 | 0    |
| TRAV34      | 0.337 | 0    |
| TRAV35      | 0.33  | 0.3  |
| TRAV36DV7   | 0.34  | 0    |
| TRAV37      | 2.676 | 0    |
| TRAV38-1    | 0.35  | 0.28 |
| TRAV38-2DV8 | 0.349 | 0.28 |
| TRAV39      | 0.331 | 0    |
| TRAV4       | 0.328 | 0    |
| TRAV40      | 0.317 | 0    |
| TRAV41      | 0.336 | 0    |
| TRAV5       | 0.34  | 0    |
| TRAV6       | 0.34  | 0.29 |
| TRAV7       | 0.337 | 0    |
| TRAV8-1     | 0.341 | 0    |
| TRAV8-2     | 0.341 | 0.29 |
| TRAV8-3     | 0.341 | 0    |
| TRAV8-4     | 0.341 | 0    |
| TRAV8-5     | 2.94  | 0.04 |
| TRAV8-6     | 0.341 | 0    |
| TRAV8-7     | 0.344 | 0    |
| TRAV9-1     | 0.338 | 0    |
| TRAV9-2     | 0.338 | 0    |

|             |       |      |
|-------------|-------|------|
| TRB@        | 0.1   | 0    |
| TRBC1       | 1.066 | 2.42 |
| TRBC2       | 1.078 | 4.04 |
| TRBD1       | 0.1   | 0    |
| TRBD2       | 0.1   | 0    |
| TRBJ1-1     | 0.1   | 0    |
| TRBJ1-2     | 0.1   | 0    |
| TRBJ1-3     | 0.1   | 0    |
| TRBJ1-4     | 0.102 | 0    |
| TRBJ1-5     | 0.1   | 0    |
| TRBJ1-6     | 0.106 | 0    |
| TRBJ2-1     | 0.1   | 0    |
| TRBJ2-2     | 0.102 | 0    |
| TRBJ2-2P    | 0.1   | 0    |
| TRBJ2-3     | 0.1   | 0    |
| TRBJ2-4     | 0.1   | 0    |
| TRBJ2-5     | 0.1   | 0    |
| TRBJ2-6     | 0.106 | 0.93 |
| TRBJ2-7     | 0.1   | 0    |
| TRBV1       | 1.566 | 0    |
| TRBV10-1    | 0.688 | 0    |
| TRBV10-2    | 0.688 | 0    |
| TRBV10-3    | 0.688 | 0.28 |
| TRBV11-1    | 0.694 | 0    |
| TRBV11-2    | 0.694 | 0    |
| TRBV11-3    | 0.694 | 0    |
| TRBV12-1    | 1.574 | 0    |
| TRBV12-2    | 1.574 | 0    |
| TRBV12-3    | 0.694 | 0    |
| TRBV12-4    | 0.694 | 0.14 |
| TRBV12-5    | 0.694 | 0    |
| TRBV13      | 0.748 | 0    |
| TRBV14      | 0.694 | 0    |
| TRBV15      | 0.688 | 0    |
| TRBV16      | 0.694 | 0.43 |
| TRBV17      | 0.688 | 0    |
| TRBV18      | 0.694 | 0    |
| TRBV19      | 0.688 | 0    |
| TRBV2       | 0.694 | 0    |
| TRBV20-1    | 0.67  | 2.95 |
| TRBV20OR9-2 | 0.999 | 0    |
| TRBV21-1    | 1.632 | 0    |
| TRBV21OR9-2 | 0.793 | 0    |
| TRBV22      | 0.74  | 0    |
| TRBV22OR9-2 | 0.768 | 0    |
| TRBV23-1    | 1.702 | 0    |
| TRBV23OR9-2 | 0.819 | 0    |
| TRBV24-1    | 0.69  | 0    |
| TRBV24OR9-2 | 0.833 | 0    |
| TRBV25-1    | 0.688 | 0    |

|             |       |      |
|-------------|-------|------|
| TRBV25OR9-2 | 0.8   | 0    |
| TRBV26      | 1.658 | 0    |
| TRBV26OR9-2 | 0.826 | 0    |
| TRBV27      | 0.688 | 0.14 |
| TRBV28      | 0.688 | 0.14 |
| TRBV29-1    | 0.67  | 0.29 |
| TRBV29OR9-2 | 0.941 | 0    |
| TRBV30      | 0.67  | 0    |
| TRBV3-1     | 0.688 | 0    |
| TRBV3-2     | 0.432 | 0    |
| TRBV4-1     | 0.688 | 0    |
| TRBV4-2     | 0.688 | 0    |
| TRBV4-3     | 0.688 | 0    |
| TRBV5-1     | 0.686 | 0.14 |
| TRBV5-2     | 1.546 | 0    |
| TRBV5-3     | 1.62  | 0.12 |
| TRBV5-4     | 0.686 | 0    |
| TRBV5-5     | 0.686 | 0    |
| TRBV5-6     | 0.686 | 0    |
| TRBV5-7     | 0.686 | 0    |
| TRBV5-8     | 0.686 | 0    |
| TRBV6-1     | 0.688 | 0    |
| TRBV6-2     | 0.688 | 0    |
| TRBV6-3     | 0.688 | 0    |
| TRBV6-4     | 0.688 | 0    |
| TRBV6-5     | 0.688 | 0    |
| TRBV6-6     | 0.688 | 0    |
| TRBV6-7     | 0.688 | 0    |
| TRBV6-8     | 0.682 | 0    |
| TRBV6-9     | 0.688 | 0    |
| TRBV7-1     | 1.672 | 0    |
| TRBV7-2     | 0.694 | 0    |
| TRBV7-3     | 0.694 | 0.14 |
| TRBV7-4     | 0.694 | 0    |
| TRBV7-5     | 1.634 | 0    |
| TRBV7-6     | 0.694 | 0    |
| TRBV7-7     | 0.694 | 0    |
| TRBV7-8     | 0.694 | 0    |
| TRBV7-9     | 0.694 | 0.14 |
| TRBV8-1     | 2.324 | 0    |
| TRBV8-2     | 1.572 | 0    |
| TRBV9       | 0.686 | 0    |
| TRBVA       | 1.74  | 0    |
| TRBVAOR9-2  | 0.454 | 0    |
| TRBVB       | 1.87  | 0    |
| TRD@        | 0.1   | 0    |
| TRDC        | 1.51  | 0.06 |
| TRDD1       | 0.1   | 0    |
| TRDD2       | 0.1   | 0    |
| TRDD3       | 0.1   | 0    |

|         |        |       |
|---------|--------|-------|
| TRDJ1   | 0.1    | 0     |
| TRDJ2   | 0.1    | 0     |
| TRDJ3   | 0.1    | 0     |
| TRDJ4   | 0.1    | 0     |
| TRDMT1  | 3.527  | 1.04  |
| TRDN    | 2.946  | 0     |
| TRDV1   | 0.347  | 0.57  |
| TRDV2   | 0.345  | 0     |
| TRDV3   | 0.341  | 0     |
| TREH    | 1.844  | 0     |
| TREM1   | 0.92   | 1.29  |
| TREM2   | 1.037  | 0     |
| TREML1  | 0.98   | 0.1   |
| TREML2  | 3.081  | 2.09  |
| TREML2P | 0.213  | 0     |
| TREML3  | 1.224  | 0     |
| TREML4  | 2.07   | 0     |
| TRERF1  | 6.214  | 1.53  |
| TREX1   | 7.374  | 2.08  |
| TREX2   | 1.255  | 0.31  |
| TRFP    | 2.478  | 2.12  |
| TRG@    | 0.1    | 0     |
| TRGC1   | 0.1    | 0     |
| TRGC2   | 1.138  | 1.39  |
| TRGJ1   | 0.1    | 0     |
| TRGJ2   | 0.1    | 0     |
| TRGJP   | 0.124  | 0.8   |
| TRGJP1  | 0.12   | 0     |
| TRGJP2  | 0.12   | 0     |
| TRGV1   | 1.642  | 0.24  |
| TRGV10  | 1.662  | 0.06  |
| TRGV11  | 1.64   | 0.06  |
| TRGV2   | 0.708  | 0.42  |
| TRGV3   | 0.708  | 0.98  |
| TRGV4   | 0.708  | 3.63  |
| TRGV5   | 0.708  | 0     |
| TRGV5P  | 1.652  | 0.36  |
| TRGV6   | 1.65   | 0.06  |
| TRGV7   | 1.654  | 0     |
| TRGV8   | 0.708  | 0     |
| TRGV9   | 0.732  | 0.13  |
| TRGVA   | 1.514  | 0     |
| TRGVB   | 1.662  | 0     |
| TRH     | 1.562  | 0.26  |
| TRHDE   | 5.618  | 0     |
| TRHR    | 1.344  | 0     |
| TRIAD3  | 12.894 | 5.52  |
| TRIAP1  | 1.182  | 13.23 |
| TRIB1   | 3.633  | 6.37  |
| TRIB2   | 4.198  | 0.3   |

|         |        |       |
|---------|--------|-------|
| TRIB3   | 2.452  | 0.04  |
| TRIM10  | 12.027 | 0     |
| TRIM11  | 2.691  | 6.73  |
| TRIM13  | 9.415  | 5.34  |
| TRIM14  | 8.165  | 3.08  |
| TRIM15  | 7.959  | 0.05  |
| TRIM16  | 2.901  | 0.58  |
| TRIM16L | 1.982  | 0.4   |
| TRIM17  | 2.212  | 0.04  |
| TRIM2   | 6.731  | 0.49  |
| TRIM21  | 1.929  | 4.67  |
| TRIM22  | 5.496  | 65.31 |
| TRIM23  | 5.439  | 1.62  |
| TRIM24  | 8.344  | 1.76  |
| TRIM25  | 5.744  | 4.92  |
| TRIM26  | 10.464 | 0.23  |
| TRIM27  | 13.056 | 0.02  |
| TRIM28  | 2.959  | 56.34 |
| TRIM29  | 3.018  | 0     |
| TRIM3   | 3.037  | 2.12  |
| TRIM31  | 9.669  | 0     |
| TRIM32  | 3.141  | 3.59  |
| TRIM33  | 8.339  | 10.33 |
| TRIM34  | 3.216  | 0.49  |
| TRIM35  | 4.227  | 1.45  |
| TRIM36  | 4.892  | 0     |
| TRIM37  | 4.829  | 1.23  |
| TRIM38  | 3.276  | 36.81 |
| TRIM39  | 10.863 | 0.02  |
| TRIM4   | 6.766  | 1.89  |
| TRIM40  | 2.988  | 0     |
| TRIM41  | 4.315  | 5.55  |
| TRIM42  | 2.538  | 0     |
| TRIM43  | 1.627  | 0     |
| TRIM44  | 4.548  | 12.27 |
| TRIM45  | 3.571  | 2.03  |
| TRIM46  | 3.142  | 0.41  |
| TRIM47  | 2.263  | 0.27  |
| TRIM48  | 1.445  | 0     |
| TRIM49  | 2.163  | 0     |
| TRIM5   | 4.162  | 2.26  |
| TRIM50  | 4.094  | 1.62  |
| TRIM52  | 2.404  | 8.68  |
| TRIM54  | 1.757  | 0     |
| TRIM55  | 3.868  | 0     |
| TRIM56  | 7.094  | 1.28  |
| TRIM58  | 2.594  | 0.88  |
| TRIM59  | 3.876  | 1.4   |
| TRIM6   | 3.964  | 0.3   |
| TRIM60  | 1.842  | 0     |



|              |        |       |
|--------------|--------|-------|
| TRIM61       | 1.58   | 0.06  |
| TRIM62       | 3.436  | 1.81  |
| TRIM63       | 1.764  | 0     |
| TRIM64       | 1.71   | 0     |
| TRIM65       | 3.409  | 1.63  |
| TRIM67       | 3.929  | 0     |
| TRIM68       | 3.3    | 1.32  |
| TRIM69       | 1.901  | 0.05  |
| TRIM6-TRIM34 | 3.46   | 0.43  |
| TRIM7        | 5.758  | 0.35  |
| TRIM71       | 3.138  | 0     |
| TRIM72       | 2.097  | 0.04  |
| TRIM73       | 2.7    | 1.68  |
| TRIM74       | 2.7    | 1.06  |
| TRIM75       | 1.407  | 0     |
| TRIM8        | 3.055  | 30.64 |
| TRIM9        | 6.675  | 0.04  |
| TRIML1       | 1.645  | 0     |
| TRIMP1       | 24.488 | 0.15  |
| TRIO         | 10.781 | 9.97  |
| TRIOBP       | 10.735 | 1.74  |
| TRIP10       | 2.011  | 0.39  |
| TRIP11       | 6.453  | 0.85  |
| TRIP12       | 6.71   | 17.7  |
| TRIP13       | 2.351  | 0.12  |
| TRIP4        | 2.028  | 4.2   |
| TRIP6        | 3.755  | 5.46  |
| TRIT1        | 2.106  | 4.04  |
| TRLP1        | 0.1    | 0     |
| TRMEP1       | 0.1    | 0     |
| TRMT1        | 2.133  | 21.56 |
| TRMT11       | 1.953  | 1.57  |
| TRMT12       | 2.034  | 14.99 |
| TRMT5        | 5.272  | 0.53  |
| TRMU         | 1.964  | 5.89  |
| TRNA         | 0.1    | 0     |
| TRNC         | 0.1    | 0     |
| TRND         | 0.1    | 0     |
| TRNE         | 0.1    | 0     |
| TRNF         | 0.1    | 0     |
| TRNG         | 0.1    | 0     |
| TRNH         | 0.1    | 0     |
| TRNI         | 0.1    | 0     |
| TRNK         | 0.1    | 0     |
| TRNL1        | 0.1    | 0     |
| TRNL2        | 0.1    | 0     |
| TRNM         | 0.1    | 0     |
| TRNN         | 0.1    | 0     |
| TRNP         | 0.1    | 0     |
| TRNQ         | 0.1    | 0     |

|         |        |       |
|---------|--------|-------|
| TRNR    | 0.1    | 0     |
| TRNS1   | 0.1    | 0     |
| TRNS2   | 0.1    | 0     |
| TRNT    | 0.1    | 0     |
| TRNT1   | 3.052  | 2.47  |
| TRNV    | 0.1    | 0     |
| TRNW    | 0.1    | 0     |
| TRNY    | 0.1    | 0     |
| TRO     | 5.007  | 0.44  |
| TROAP   | 2.527  | 0.94  |
| TROVE2  | 3.081  | 3.79  |
| TRPA1   | 5.19   | 0     |
| TRPC1   | 4.069  | 0.12  |
| TRPC2   | 12.265 | 0.79  |
| TRPC3   | 3.424  | 0     |
| TRPC4   | 3.41   | 0     |
| TRPC4AP | 6.779  | 44.47 |
| TRPC5   | 5.84   | 0     |
| TRPC6   | 4.54   | 0     |
| TRPC6P  | 1.804  | 0     |
| TRPC7   | 2.589  | 0     |
| TRPM1   | 5.428  | 0     |
| TRPM2   | 7.269  | 6.69  |
| TRPM3   | 7.095  | 0     |
| TRPM4   | 4.055  | 0.68  |
| TRPM5   | 3.914  | 0     |
| TRPM6   | 8.425  | 0.08  |
| TRPM7   | 7.218  | 3.36  |
| TRPM8   | 5.621  | 0.05  |
| TRPS1   | 9.99   | 0.09  |
| TRPT1   | 1.222  | 6.96  |
| TRPV1   | 4.982  | 2.6   |
| TRPV2   | 2.776  | 3.85  |
| TRPV3   | 3.42   | 0.03  |
| TRPV4   | 3.237  | 0     |
| TRPV5   | 4.972  | 0     |
| TRPV6   | 5.789  | 0     |
| TRRAP   | 25.421 | 2.8   |
| TRSPAP1 | 1.785  | 4.83  |
| TRUB1   | 3.399  | 1.89  |
| TRUB2   | 1.439  | 3.3   |
| TRY1    | 1.692  | 0     |
| TRY2P   | 10.93  | 0.01  |
| TRY3    | 8.722  | 0     |
| TRY5    | 7.132  | 0     |
| TRY6    | 9.078  | 0.01  |
| TRY7    | 7.14   | 0     |
| TSC1    | 9.384  | 5.28  |
| TSC2    | 5.705  | 12.89 |
| TSC22D1 | 6.258  | 26.5  |

|          |       |         |
|----------|-------|---------|
| TSC22D2  | 3.901 | 4.94    |
| TSC22D3  | 3.221 | 1075.56 |
| TSC22D4  | 9.139 | 33.27   |
| TSCOT    | 2.354 | 0.08    |
| TSEN2    | 2.359 | 0.21    |
| TSEN34   | 1.349 | 3.88    |
| TSEN54   | 1.905 | 1.92    |
| TSFM     | 1.218 | 8.44    |
| TSG101   | 1.534 | 22.32   |
| TSGA10   | 3.69  | 0.03    |
| TSGA10IP | 1.726 | 0       |
| TSGA13   | 3.306 | 0.06    |
| TSGA14   | 7.052 | 0.12    |
| TSGA2    | 1.367 | 0.21    |
| TSHB     | 0.578 | 0       |
| TSHR     | 4.735 | 0.02    |
| TSHZ1    | 4.967 | 4.56    |
| TSHZ2    | 4.129 | 5.66    |
| TSHZ3    | 4.325 | 0       |
| TSKS     | 1.812 | 0.05    |
| TSKU     | 2.71  | 9.13    |
| TSLP     | 2.949 | 0       |
| TSN      | 3.408 | 10.62   |
| TSNARE1  | 1.901 | 0.11    |
| TSNAX    | 2.65  | 11.46   |
| TSNAXIP1 | 2.159 | 1.19    |
| TSP50    | 1.338 | 0.15    |
| TSPAN1   | 1.278 | 0       |
| TSPAN10  | 1.612 | 0.25    |
| TSPAN11  | 1.48  | 0       |
| TSPAN12  | 5.128 | 0       |
| TSPAN13  | 5.243 | 15.91   |
| TSPAN14  | 5.042 | 219.13  |
| TSPAN15  | 1.699 | 18.58   |
| TSPAN16  | 1.04  | 0       |
| TSPAN17  | 4.207 | 2.03    |
| TSPAN18  | 3.548 | 0.17    |
| TSPAN19  | 1     | 0       |
| TSPAN2   | 3.207 | 0       |
| TSPAN3   | 3.173 | 46.83   |
| TSPAN31  | 1.74  | 2.39    |
| TSPAN32  | 2.287 | 0.6     |
| TSPAN33  | 3.954 | 11.14   |
| TSPAN4   | 2.067 | 1.44    |
| TSPAN5   | 1.432 | 0.42    |
| TSPAN6   | 2.069 | 0       |
| TSPAN7   | 1.798 | 27.18   |
| TSPAN8   | 1.13  | 0       |
| TSPAN9   | 4.315 | 3.85    |
| TSPO     | 1.445 | 13.7    |

|        |        |       |
|--------|--------|-------|
| TSPY1  | 1.16   | 0     |
| TSPY2  | 1.16   | 0     |
| TSPYL1 | 3.388  | 20.12 |
| TSPYL2 | 2.802  | 41.88 |
| TSPYL3 | 1.215  | 0.65  |
| TSPYL4 | 4.135  | 5.74  |
| TSPYL5 | 4.463  | 0.04  |
| TSPYL6 | 3.026  | 0     |
| TSPYP1 | 2.733  | 0     |
| TSPYP2 | 2.792  | 0     |
| TSPYP3 | 2.733  | 0     |
| TSPYP4 | 2.811  | 0     |
| TSPYP5 | 2.803  | 0     |
| TSR1   | 4.89   | 2.95  |
| TSR2   | 1.325  | 46.59 |
| TSSC1  | 1.664  | 18.08 |
| TSSC4  | 1.424  | 15    |
| TSSK1A | 0.95   | 0     |
| TSSK1B | 1.996  | 0     |
| TSSK2  | 1.347  | 0     |
| TSSK3  | 2.093  | 13.71 |
| TSSK4  | 1.257  | 1.02  |
| TSSK6  | 1.442  | 0.83  |
| TST    | 1.128  | 7.55  |
| TSTA3  | 2.56   | 47.27 |
| TTBK1  | 7.128  | 0     |
| TTBK2  | 5.614  | 1.24  |
| TTC1   | 1.407  | 3.72  |
| TTC12  | 2.315  | 0.04  |
| TTC13  | 3.252  | 2.04  |
| TTC14  | 2.832  | 3.22  |
| TTC15  | 2.524  | 3.69  |
| TTC16  | 2.884  | 0     |
| TTC17  | 3.759  | 12.21 |
| TTC18  | 3.695  | 0.21  |
| TTC19  | 2.784  | 8.92  |
| TTC21A | 4.213  | 1.13  |
| TTC21B | 4.558  | 2.26  |
| TTC22  | 2.149  | 0     |
| TTC23  | 3.537  | 0.28  |
| TTC24  | 1.969  | 1.96  |
| TTC25  | 2.077  | 1.15  |
| TTC26  | 4.226  | 0.1   |
| TTC27  | 2.876  | 1.62  |
| TTC28  | 11.653 | 1.06  |
| TTC29  | 1.74   | 0     |
| TTC3   | 9.101  | 8.84  |
| TTC30A | 4.669  | 0.1   |
| TTC30B | 2.189  | 0.86  |
| TTC31  | 3.356  | 3.83  |

|        |        |       |
|--------|--------|-------|
| TTC32  | 1.425  | 11.46 |
| TTC33  | 2.551  | 1.32  |
| TTC35  | 1.238  | 3.04  |
| TTC4   | 1.985  | 1.44  |
| TTC5   | 1.845  | 1.18  |
| TTC6   | 1.623  | 0     |
| TTC7A  | 6.779  | 31.97 |
| TTC7B  | 3.434  | 1.3   |
| TTC8   | 2.203  | 1.12  |
| TTC9   | 5.51   | 0.12  |
| TTC9B  | 0.835  | 0     |
| TTC9C  | 1.139  | 3.22  |
| TTF1   | 3.137  | 5.43  |
| TTF2   | 4.855  | 0.77  |
| TTK    | 2.968  | 0.57  |
| TTL    | 4.443  | 1.91  |
| TLL1   | 2.043  | 0.24  |
| TLL10  | 2.111  | 0     |
| TLL11  | 2.012  | 0.25  |
| TLL12  | 3.353  | 1.21  |
| TLL13  | 1.793  | 0.05  |
| TLL2   | 2.684  | 0     |
| TLL3   | 5.426  | 18.49 |
| TLL4   | 4.191  | 0.57  |
| TLL5   | 4.684  | 2.9   |
| TLL6   | 2.533  | 0.12  |
| TLL7   | 3.648  | 0     |
| TLL9   | 2.623  | 8.41  |
| TTMA   | 3.024  | 0.23  |
| TTMB   | 2.761  | 1.04  |
| TTN    | 111.97 | 0.5   |
| TPA    | 1.249  | 0     |
| TTR    | 0.615  | 0     |
| TTRAP  | 2.259  | 4.2   |
| TTY1   | 0.91   | 0     |
| TTY10  | 1.628  | 1.03  |
| TTY11  | 0.834  | 0     |
| TTY12  | 0.979  | 0     |
| TTY13  | 0.659  | 0     |
| TTY14  | 0.515  | 2.5   |
| TTY15  | 5.242  | 6.05  |
| TTY16  | 0.192  | 0     |
| TTY17A | 0.166  | 0     |
| TTY17B | 0.166  | 0     |
| TTY17C | 0.166  | 0     |
| TTY18  | 0.221  | 0     |
| TTY19  | 0.269  | 0     |
| TTY2   | 3.168  | 0     |
| TTY20  | 0.259  | 0     |
| TTY21  | 0.307  | 0     |

|         |        |        |
|---------|--------|--------|
| TTY22   | 0.427  | 0      |
| TTY23   | 0.512  | 0      |
| TTY3    | 0.344  | 0      |
| TTY3B   | 0.344  | 0      |
| TTY4    | 1.346  | 0      |
| TTY4B   | 1.346  | 0      |
| TTY4C   | 1.346  | 0      |
| TTY5    | 1.562  | 0      |
| TTY6    | 0.492  | 0      |
| TTY6B   | 0.473  | 0      |
| TTY7    | 1.367  | 0      |
| TTY8    | 0.531  | 0      |
| TTY9A   | 1.637  | 0      |
| TTY9B   | 1.637  | 0      |
| TYH1    | 2.684  | 0.22   |
| TYH2    | 7.15   | 57.12  |
| TYH3    | 11.275 | 9.87   |
| TUB     | 6.6    | 0      |
| TUBA1A  | 1.666  | 48.76  |
| TUBA1B  | 1.753  | 70.15  |
| TUBA1C  | 1.553  | 7.78   |
| TUBA3C  | 1.69   | 0      |
| TUBA3D  | 1.664  | 6.3    |
| TUBA3E  | 1.54   | 0      |
| TUBA4A  | 2.001  | 145.56 |
| TUBA4B  | 20.326 | 0.27   |
| TUBA8   | 2.018  | 1.27   |
| TUBAL3  | 1.8    | 0      |
| TUBAP   | 1.731  | 0      |
| TUBB    | 7.462  | 0.6    |
| TUBB1   | 3.496  | 0.53   |
| TUBB2A  | 1.621  | 0.43   |
| TUBB2B  | 1.906  | 0.1    |
| TUBB2C  | 1.591  | 29.72  |
| TUBB3   | 1.711  | 0.76   |
| TUBB4   | 2.287  | 0.04   |
| TUBB4Q  | 1.305  | 0      |
| TUBB6   | 1.815  | 5.07   |
| TUBB8   | 1.335  | 0      |
| TUBBP3  | 0.882  | 0.22   |
| TUBD1   | 2.472  | 1      |
| TUBE1   | 2.082  | 0.47   |
| TUBG1   | 1.611  | 1.04   |
| TUBG2   | 1.773  | 0.11   |
| TUBGCP2 | 4.473  | 15.75  |
| TUBGCP3 | 3.893  | 7.9    |
| TUBGCP5 | 3.743  | 4.78   |
| TUBGCP6 | 8.076  | 9.11   |
| TUFM    | 1.605  | 70.27  |
| TUFT1   | 3.111  | 1.53   |

|         |        |        |
|---------|--------|--------|
| TUG1    | 7.105  | 22.7   |
| TULP1   | 2.089  | 0      |
| TULP2   | 1.702  | 0      |
| TULP3   | 2.934  | 0.98   |
| TULP4   | 16.374 | 0.78   |
| TUSC1   | 1.882  | 0.11   |
| TUSC2   | 1.682  | 8.82   |
| TUSC3   | 1.871  | 0      |
| TUSC4   | 1.664  | 13.55  |
| TUSC5   | 3.596  | 0      |
| TUT1    | 2.73   | 5.29   |
| TWF1    | 3.686  | 1.42   |
| TWF2    | 1.625  | 9.93   |
| TWIST1  | 3.333  | 0.2    |
| TWISTNB | 7.784  | 2.71   |
| TWSG1   | 3.67   | 2.43   |
| TXK     | 2.563  | 0.2    |
| TXLNA   | 4.796  | 2.91   |
| TXLNB   | 4.633  | 0.38   |
| TXN     | 0.508  | 22.99  |
| TXN2    | 1.336  | 22.07  |
| TXNDC1  | 2.443  | 2.84   |
| TXNDC10 | 4.745  | 3.52   |
| TXNDC11 | 3.047  | 37.96  |
| TXNDC12 | 1.6    | 11.44  |
| TXNDC13 | 2.635  | 8.19   |
| TXNDC14 | 1.667  | 19.28  |
| TXNDC2  | 1.847  | 0      |
| TXNDC3  | 4.624  | 0.04   |
| TXNDC4  | 4.862  | 7.86   |
| TXNDC5  | 3.33   | 6.09   |
| TXNDC6  | 2.133  | 0.37   |
| TXNDC8  | 0.455  | 0      |
| TXNDC9  | 1.53   | 1.87   |
| TXNIP   | 2.704  | 809.13 |
| TXNL1   | 1.28   | 23.19  |
| TXNL2   | 1.902  | 4.84   |
| TXNL4A  | 1.387  | 13.48  |
| TXNL4B  | 2.516  | 3.03   |
| TXNL5   | 0.727  | 4.77   |
| TXNL6   | 0.908  | 0      |
| TXNRD1  | 4.068  | 4.69   |
| TXNRD2  | 1.964  | 3.12   |
| TXNRD3  | 3.118  | 0.04   |
| TYK2    | 4.943  | 28.73  |
| TYMS    | 1.529  | 14.95  |
| TYR     | 1.964  | 0      |
| TYRL    | 11.169 | 0      |
| TYRO3   | 3.949  | 0.1    |
| TYRO3P  | 0.864  | 0.12   |

|           |        |        |
|-----------|--------|--------|
| TYROBP    | 0.61   | 7.14   |
| TYRP1     | 2.805  | 0      |
| TYSND1    | 5.967  | 0.6    |
| TYW1      | 6.662  | 2.42   |
| TYW3      | 2.38   | 4.83   |
| U1SNRNPBP | 2.975  | 4.82   |
| U2AF1     | 10.375 | 32.63  |
| U2AF1L4   | 1.805  | 22.74  |
| U2AF2     | 3.218  | 21.4   |
| U58       | 0.1    | 1.98   |
| UACA      | 7.262  | 7.73   |
| UAP1      | 2.294  | 1.34   |
| UAP1L1    | 3.201  | 0.96   |
| UBA52     | 2.895  | 196.64 |
| UBA52P1   | 0.95   | 5.11   |
| UBA52P2   | 0.34   | 0.58   |
| UBA52P3   | 0.521  | 199.96 |
| UBADC1    | 1.867  | 4.88   |
| UBAP1     | 2.735  | 15.41  |
| UBAP2     | 4.284  | 8.54   |
| UBAP2L    | 6.705  | 47.19  |
| UBASH3A   | 2.492  | 0.12   |
| UBB       | 0.971  | 313.42 |
| UBBP1     | 0.615  | 21.07  |
| UBBP2     | 0.425  | 13.5   |
| UBBP3     | 0.376  | 0      |
| UBBP4     | 0.914  | 1.62   |
| UBC       | 2.404  | 642.23 |
| UBCH7N2   | 0.357  | 0.83   |
| UBD       | 2.913  | 0      |
| UBE1      | 4.786  | 32     |
| UBE1C     | 2.68   | 9.45   |
| UBE1DC1   | 3.496  | 2.86   |
| UBE1L     | 4.108  | 46.91  |
| UBE1L2    | 5.367  | 5.63   |
| UBE2A     | 3.06   | 15.16  |
| UBE2B     | 3.124  | 24.07  |
| UBE2C     | 2.411  | 0.78   |
| UBE2CP1   | 0.774  | 0.9    |
| UBE2D1    | 2.651  | 1.9    |
| UBE2D2    | 3.581  | 28.29  |
| UBE2D3    | 5.998  | 47.57  |
| UBE2D4    | 2.796  | 1.2    |
| UBE2E1    | 1.987  | 35.45  |
| UBE2E2    | 1.51   | 2.62   |
| UBE2E3    | 1.737  | 7.86   |
| UBE2E4P   | 1.159  | 3.5    |
| UBE2F     | 1.697  | 21.16  |
| UBE2G1    | 4.332  | 5.62   |
| UBE2G2    | 3.189  | 16.14  |



|          |        |       |
|----------|--------|-------|
| UBE2H    | 8.746  | 34.74 |
| UBE2I    | 4.557  | 22.28 |
| UBE2J1   | 4.342  | 21.78 |
| UBE2J2   | 2.609  | 9.37  |
| UBE2L3   | 5.536  | 4.93  |
| UBE2L4   | 0.464  | 0.85  |
| UBE2L6   | 1.579  | 14.03 |
| UBE2L7P  | 0.683  | 13.33 |
| UBE2M    | 1.516  | 8.68  |
| UBE2MP1  | 0.961  | 2.06  |
| UBE2N    | 2.552  | 31.17 |
| UBE2NL   | 1.19   | 2.49  |
| UBE2O    | 5.322  | 3.87  |
| UBE2Q1   | 3.221  | 11.31 |
| UBE2Q2   | 2.922  | 5.41  |
| UBE2R2   | 4.457  | 10.08 |
| UBE2S    | 0.881  | 5.61  |
| UBE2SP1  | 0.881  | 1.69  |
| UBE2T    | 0.898  | 0.66  |
| UBE2U    | 1.136  | 0     |
| UBE2V1   | 3.173  | 7.89  |
| UBE2V1P1 | 0.421  | 1.41  |
| UBE2V2   | 1.524  | 1.89  |
| UBE2W    | 7.706  | 2.38  |
| UBE2Z    | 2.99   | 16.91 |
| UBE3A    | 5.239  | 14    |
| UBE3AP1  | 0.537  | 0     |
| UBE3AP2  | 3.149  | 0.59  |
| UBE3B    | 5.861  | 2.76  |
| UBE3C    | 10.336 | 0.95  |
| UBE4A    | 6.122  | 3.86  |
| UBE4B    | 5.491  | 7.39  |
| UBFD1    | 4.931  | 7.66  |
| UBIAD1   | 1.489  | 3.25  |
| UBL3     | 4.335  | 22.02 |
| UBL4A    | 2.305  | 0.52  |
| UBL4B    | 1.508  | 0     |
| UBL5     | 0.663  | 37.9  |
| UBL7     | 1.499  | 15.31 |
| UBLCP1   | 2.174  | 3     |
| UBN1     | 6.338  | 6.77  |
| UBOX5    | 4.329  | 5.28  |
| UBP1     | 4.393  | 17.63 |
| UBQLN1   | 5.546  | 38.78 |
| UBQLN2   | 3.306  | 8.44  |
| UBQLN3   | 2.345  | 0     |
| UBQLN4   | 3.507  | 2.14  |
| UBQLN4P  | 3.574  | 1.52  |
| UBQLNL   | 2.303  | 0.43  |
| UBR1     | 7.748  | 3.37  |

|          |       |       |
|----------|-------|-------|
| UBR2     | 5.635 | 8.27  |
| UBTD1    | 1.557 | 0.32  |
| UBTD2    | 1.113 | 1.87  |
| UBTF     | 4.198 | 17.35 |
| UBXD1    | 1.887 | 30.73 |
| UBXD2    | 4.405 | 33.17 |
| UBXD3    | 2.972 | 1.7   |
| UBXD4    | 1.896 | 3.76  |
| UBXD5    | 2.735 | 12.11 |
| UBXD6    | 1.441 | 1.44  |
| UBXD7    | 7.694 | 13.9  |
| UBXD8    | 4.492 | 15.06 |
| UCHL1    | 1.093 | 0.09  |
| UCHL3    | 0.844 | 4.57  |
| UCHL5    | 1.703 | 2.79  |
| UCHL5IP  | 1.891 | 1.83  |
| UCK1     | 2.164 | 5.99  |
| UCK2     | 1.25  | 2.77  |
| UCKL1    | 1.833 | 31.04 |
| UCN      | 0.615 | 1.77  |
| UCN2     | 1.485 | 0     |
| UCN3     | 0.71  | 0     |
| UCP1     | 1.048 | 0     |
| UCP2     | 3.479 | 41.15 |
| UCP3     | 2.59  | 0.27  |
| UCRC     | 1.861 | 8.51  |
| UEVLD    | 1.966 | 1.11  |
| UFC1     | 1.107 | 88.93 |
| UFD1L    | 1.975 | 11.72 |
| UFM1     | 2.522 | 14.47 |
| UGCG     | 3.405 | 32.19 |
| UGCGL1   | 7.568 | 4.22  |
| UGCGL2   | 4.832 | 0     |
| UGDH     | 3.189 | 0.21  |
| UGP2     | 2.565 | 15.93 |
| UGT1A1   | 2.357 | 0     |
| UGT1A10  | 2.385 | 0     |
| UGT1A11P | 0.846 | 0     |
| UGT1A12P | 0.853 | 0     |
| UGT1A13P | 1.098 | 0     |
| UGT1A2P  | 1.433 | 0     |
| UGT1A3   | 2.345 | 0     |
| UGT1A4   | 2.374 | 0     |
| UGT1A5   | 2.345 | 0     |
| UGT1A6   | 2.648 | 0     |
| UGT1A7   | 2.333 | 0     |
| UGT1A8   | 2.396 | 0     |
| UGT1A9   | 2.376 | 0     |
| UGT2A1   | 1.764 | 0     |
| UGT2A3   | 2.974 | 0     |

|          |        |       |
|----------|--------|-------|
| UGT2B10  | 1.619  | 0     |
| UGT2B11  | 1.722  | 0     |
| UGT2B15  | 2.091  | 0     |
| UGT2B17  | 2.077  | 0     |
| UGT2B24P | 1.023  | 0     |
| UGT2B25P | 0.899  | 0     |
| UGT2B26P | 0.888  | 0     |
| UGT2B27P | 1.008  | 0     |
| UGT2B28  | 1.833  | 0     |
| UGT2B29P | 1.021  | 0     |
| UGT2B4   | 2.092  | 0     |
| UGT2B7   | 1.854  | 0     |
| UGT3A1   | 2.823  | 0     |
| UGT3A2   | 2.341  | 0.38  |
| UGT8     | 2.448  | 0     |
| UHMK1    | 4.495  | 9.38  |
| UHRF1    | 3.816  | 5.11  |
| UHRF2    | 5.065  | 20.34 |
| UIMC1    | 2.604  | 19.19 |
| ULBP1    | 3.142  | 0     |
| ULBP2    | 1.349  | 0.15  |
| ULBP3    | 0.735  | 0.54  |
| ULK1     | 6.774  | 27    |
| ULK2     | 5.807  | 0.82  |
| ULK3     | 2.622  | 12.34 |
| ULK4     | 3.969  | 0.85  |
| UM9(5)   | 9.848  | 0     |
| UMOD     | 2.354  | 0     |
| UMODL1   | 5.889  | 0.08  |
| UMPS     | 2.246  | 2.34  |
| UNC119   | 2.523  | 5.17  |
| UNC13A   | 10.102 | 0     |
| UNC13B   | 6.3    | 2.31  |
| UNC13C   | 8.14   | 0     |
| UNC13D   | 4.361  | 4.28  |
| UNC45A   | 4.393  | 4.05  |
| UNC45B   | 5.821  | 0.02  |
| UNC50    | 2.379  | 3.87  |
| UNC5A    | 3.733  | 0.03  |
| UNC5B    | 3.916  | 0     |
| UNC5C    | 3.646  | 0     |
| UNC5CL   | 2.987  | 0.67  |
| UNC5D    | 7.002  | 0     |
| UNC84A   | 8.704  | 13    |
| UNC84B   | 4.961  | 56.79 |
| UNC93A   | 2.012  | 0     |
| UNC93B1  | 2.315  | 9.1   |
| UNCX4.1  | 1.596  | 0     |
| UNG      | 2.473  | 1.72  |
| UNGP1    | 1.032  | 0     |

|         |       |       |
|---------|-------|-------|
| UNGP2   | 0.627 | 0     |
| UNGP3   | 2.252 | 0     |
| UNK     | 4.632 | 11.04 |
| UNKL    | 1.379 | 5.16  |
| UNQ1887 | 3.403 | 7.97  |
| UNQ1940 | 3.29  | 0     |
| UNQ1945 | 1.402 | 0.42  |
| UNQ2541 | 0.762 | 0.13  |
| UNQ2963 | 0.332 | 1.79  |
| UNQ338  | 0.95  | 0     |
| UNQ467  | 0.414 | 0     |
| UNQ473  | 0.853 | 0     |
| UNQ501  | 1.03  | 5.09  |
| UNQ5783 | 0.916 | 2.81  |
| UNQ5830 | 2.412 | 0     |
| UNQ6125 | 1.513 | 0     |
| UNQ6190 | 1.568 | 0     |
| UNQ6411 | 1.386 | 0     |
| UNQ6490 | 1.018 | 0     |
| UNQ830  | 0.465 | 0.21  |
| UNQ846  | 1.448 | 0     |
| UNQ9217 | 1.529 | 0.06  |
| UNQ9368 | 0.751 | 5.27  |
| UNQ9370 | 1.983 | 0     |
| UNQ9391 | 1.099 | 0     |
| UNQ9433 | 1.07  | 0     |
| UNQ9438 | 0.622 | 0.64  |
| UPB1    | 2.067 | 1.96  |
| UPF1    | 5.345 | 14.59 |
| UPF2    | 6.554 | 11.22 |
| UPF3A   | 2.683 | 6.16  |
| UPF3B   | 2.381 | 6.53  |
| UPK1A   | 1.223 | 0     |
| UPK1B   | 2.058 | 0     |
| UPK2    | 0.916 | 0     |
| UPK3A   | 1.025 | 0     |
| UPK3B   | 4.674 | 0.02  |
| UPP1    | 4.517 | 3.99  |
| UPP2    | 2.221 | 0     |
| UPRT    | 2.147 | 3.82  |
| UQCR    | 1.266 | 20.16 |
| UQCRB   | 0.938 | 105.9 |
| UQCRC1  | 1.617 | 22.4  |
| UQCRC2  | 2.092 | 46.63 |
| UQCRFS1 | 1.202 | 50.87 |
| UQCRH   | 0.726 | 96.35 |
| UQCRQ   | 0.731 | 25.99 |
| URG4    | 7.072 | 3.32  |
| URM1    | 1.326 | 33.87 |
| UROC1   | 3.127 | 0     |

|         |        |       |
|---------|--------|-------|
| UROD    | 1.383  | 20.25 |
| UROS    | 1.279  | 9.9   |
| URP2    | 3.087  | 9.26  |
| USF1    | 2.311  | 40.54 |
| USF2    | 2.734  | 40.06 |
| USH1C   | 3.802  | 0     |
| USH1G   | 3.561  | 0     |
| USH2A   | 20.42  | 0     |
| USHBP1  | 2.41   | 0     |
| USMG5   | 0.553  | 32.39 |
| USP1    | 4.362  | 4.53  |
| USP10   | 2.995  | 7.89  |
| USP11   | 4.014  | 18.61 |
| USP12   | 3.11   | 12.72 |
| USP12P1 | 2.29   | 0.22  |
| USP12P2 | 2.243  | 1.15  |
| USP12P3 | 2.243  | 0.71  |
| USP13   | 2.717  | 0.59  |
| USP14   | 4.156  | 10.17 |
| USP15   | 5.06   | 21.58 |
| USP16   | 3.73   | 12.83 |
| USP18   | 2.037  | 0.78  |
| USP19   | 4.673  | 13.65 |
| USP2    | 2.968  | 0     |
| USP20   | 5.956  | 2.64  |
| USP21   | 2.354  | 5.59  |
| USP22   | 7.326  | 66.2  |
| USP24   | 10.994 | 15.22 |
| USP25   | 4.968  | 6.53  |
| USP26   | 2.794  | 0     |
| USP27X  | 1.674  | 0.24  |
| USP28   | 4.632  | 6.9   |
| USP29   | 3.607  | 0     |
| USP3    | 3.065  | 20.34 |
| USP30   | 2.098  | 5.19  |
| USP31   | 4.059  | 2.95  |
| USP32   | 7.026  | 4.05  |
| USP33   | 4.913  | 4.6   |
| USP34   | 12.068 | 21.12 |
| USP35   | 5.359  | 1.16  |
| USP36   | 8.495  | 38.46 |
| USP37   | 7.997  | 1.32  |
| USP38   | 4.666  | 7.87  |
| USP39   | 2.209  | 21.05 |
| USP4    | 3.683  | 22.05 |
| USP40   | 3.505  | 1.75  |
| USP41   | 1.949  | 0.3   |
| USP42   | 10.187 | 5.34  |
| USP44   | 2.872  | 0.07  |
| USP45   | 6.99   | 0.51  |

|         |        |        |
|---------|--------|--------|
| USP46   | 3.83   | 1.52   |
| USP47   | 7.777  | 8.11   |
| USP48   | 5.339  | 6.63   |
| USP49   | 3.177  | 0.35   |
| USP5    | 3.103  | 5.04   |
| USP50   | 1.319  | 4.5    |
| USP51   | 2.49   | 0.68   |
| USP52   | 4.489  | 10.01  |
| USP53   | 3.219  | 1.63   |
| USP54   | 4.773  | 2.24   |
| USP6    | 7.971  | 0.08   |
| USP6NL  | 5.775  | 19.52  |
| USP7    | 6.231  | 29.74  |
| USP8    | 4.243  | 11.75  |
| USP9X   | 12.614 | 16.6   |
| USP9Y   | 10.04  | 2.63   |
| USP9YP1 | 3.339  | 0      |
| USP9YP2 | 3.339  | 0      |
| USPL1   | 3.814  | 16.5   |
| UST     | 4.197  | 0.36   |
| UTF1    | 1.157  | 0.17   |
| UTP11L  | 1.017  | 9.92   |
| UTP14A  | 2.488  | 4.97   |
| UTP14C  | 5.494  | 1.6    |
| UTP15   | 3.655  | 5      |
| UTP18   | 1.873  | 4.86   |
| UTP20   | 8.995  | 0.9    |
| UTP6    | 2.065  | 10.59  |
| UTRN    | 10.541 | 8.09   |
| UTS2    | 0.787  | 0.12   |
| UTS2D   | 1.279  | 0      |
| UTS2R   | 1.17   | 0.09   |
| UTX     | 5.423  | 9.71   |
| UTY     | 7.197  | 5.74   |
| UVRAG   | 3.515  | 5.57   |
| UXS1    | 6.373  | 20.98  |
| UXT     | 0.909  | 50.94  |
| VAC14   | 3.096  | 4.12   |
| VAMP1   | 6.047  | 7.55   |
| VAMP2   | 2.892  | 110.81 |
| VAMP3   | 2.205  | 15.07  |
| VAMP4   | 2.126  | 2.47   |
| VAMP5   | 0.665  | 79.15  |
| VAMP8   | 0.671  | 52.05  |
| VANGL1  | 8.691  | 0.12   |
| VANGL2  | 5.348  | 0.19   |
| VAPA    | 6.994  | 8.8    |
| VAPB    | 3.675  | 4.06   |
| VARS    | 10.677 | 1.83   |
| VARS2   | 12.21  | 0.12   |

|         |        |       |
|---------|--------|-------|
| VASH1   | 5.728  | 2.52  |
| VASH2   | 3.572  | 0     |
| VASN    | 2.806  | 0.46  |
| VASP    | 3.328  | 3.03  |
| VAT1    | 2.694  | 8.85  |
| VAV1    | 2.888  | 6.61  |
| VAV2    | 4.693  | 2.7   |
| VAV3    | 4.757  | 17.88 |
| VAX1    | 4.494  | 0     |
| VAX2    | 1.147  | 0     |
| VBP1    | 1.779  | 6.12  |
| VCAM1   | 3.102  | 0     |
| VCAN    | 11.185 | 0.61  |
| VCL     | 5.859  | 10.82 |
| VCP     | 3.189  | 18.55 |
| VCPIP1  | 8.176  | 4.18  |
| VCX     | 0.967  | 0     |
| VCX2    | 0.815  | 0     |
| VCX3A   | 0.995  | 0     |
| VCX-C   | 1.081  | 0     |
| VCY     | 0.551  | 0     |
| VCY1B   | 0.545  | 0     |
| VDAC1   | 1.806  | 20.16 |
| VDAC1LP | 0.535  | 0.37  |
| VDAC2   | 1.503  | 21.46 |
| VDAC2P  | 1.084  | 0     |
| VDAC3   | 1.386  | 8.28  |
| VDAC5P  | 0.273  | 0     |
| VDP     | 3.891  | 3.48  |
| VDR     | 4.775  | 0.19  |
| VEGFA   | 7.706  | 0.11  |
| VEGFB   | 1.385  | 17.57 |
| VEGFC   | 2.079  | 0     |
| VENTX   | 2.411  | 2.59  |
| VENTXP1 | 2.716  | 0     |
| VENTXP2 | 0.481  | 0     |
| VENTXP3 | 2.035  | 0     |
| VENTXP4 | 1.463  | 0     |
| VENTXP5 | 1.909  | 0     |
| VENTXP6 | 1.157  | 0     |
| VENTXP7 | 0.983  | 0.2   |
| VEPH1   | 3.044  | 0     |
| VEZF1   | 5.834  | 15.09 |
| VEZT    | 3.942  | 12.95 |
| VGCNL1  | 6.923  | 0     |
| VGf     | 5.092  | 0.05  |
| VGLL1   | 1.212  | 0     |
| VGLL2   | 3.489  | 0     |
| VGLL3   | 10.396 | 0     |
| VGLL4   | 3.542  | 9.47  |

|          |        |        |
|----------|--------|--------|
| VHL      | 2.968  | 15.9   |
| VHLL     | 0.676  | 0      |
| VIL1     | 2.694  | 0.11   |
| VIL2     | 4.043  | 445.96 |
| VILL     | 2.787  | 3.97   |
| VIM      | 1.847  | 331.09 |
| VIP      | 1.713  | 0      |
| VIPR1    | 2.772  | 0.18   |
| VIPR2    | 7.889  | 2.58   |
| VISA     | 3.543  | 7.07   |
| VIT      | 2.728  | 0      |
| VKORC1   | 1.487  | 5.32   |
| VKORC1L1 | 2.296  | 0.47   |
| VKORC1P1 | 0.793  | 0.37   |
| VKORC1P2 | 0.62   | 0.16   |
| VDLDR    | 3.636  | 0.13   |
| VMAC     | 1.628  | 3.64   |
| VMO1     | 0.766  | 1.16   |
| VN1R1    | 1.313  | 0.83   |
| VN1R2    | 1.188  | 0      |
| VN1R3    | 1.269  | 0      |
| VN1R4    | 0.906  | 0      |
| VN1R5    | 1.074  | 0      |
| VN1R8P   | 0.815  | 0      |
| VN1R9P   | 1.723  | 0      |
| VN2R1P   | 2.325  | 0      |
| VN2R9P   | 26.192 | 0      |
| VNN1     | 3.106  | 0.67   |
| VNN2     | 2.17   | 1.46   |
| VNN3     | 2.638  | 0.27   |
| VPRBP    | 5.859  | 7.24   |
| VPREB1   | 0.72   | 237.18 |
| VPREB3   | 0.545  | 54.28  |
| VPS11    | 3.222  | 15.45  |
| VPS13A   | 12.551 | 1.9    |
| VPS13B   | 14.938 | 1.94   |
| VPS13C   | 15.672 | 2.62   |
| VPS13D   | 16.329 | 2.06   |
| VPS16    | 3.227  | 4.6    |
| VPS18    | 3.895  | 11.28  |
| VPS24    | 3.526  | 13.64  |
| VPS25    | 1.101  | 6.29   |
| VPS26A   | 4.408  | 7.86   |
| VPS26B   | 4.785  | 22.21  |
| VPS28    | 2.034  | 26.12  |
| VPS29    | 1.665  | 26.74  |
| VPS33A   | 2.603  | 4.71   |
| VPS33B   | 2.49   | 9.5    |
| VPS35    | 3.233  | 5.11   |
| VPS36    | 4.423  | 6.42   |



|        |        |       |
|--------|--------|-------|
| VPS37A | 2.02   | 1.08  |
| VPS37B | 4.396  | 58.14 |
| VPS37C | 2.692  | 3.75  |
| VPS37D | 4.072  | 0     |
| VPS39  | 4.832  | 32.39 |
| VPS41  | 11.376 | 0.88  |
| VPS45  | 2.817  | 2.43  |
| VPS4A  | 2.473  | 36.01 |
| VPS4B  | 3.38   | 6.14  |
| VPS52  | 8.853  | 0.04  |
| VPS53  | 2.191  | 1.89  |
| VPS54  | 4.2    | 5.58  |
| VPS72  | 1.324  | 3.66  |
| VPS8   | 5.009  | 2.83  |
| VRK1   | 1.703  | 4.12  |
| VRK2   | 1.994  | 1.79  |
| VRK3   | 2.1    | 2.36  |
| VSIG1  | 3.128  | 0     |
| VSIG2  | 1.121  | 0     |
| VSIG4  | 1.77   | 0.28  |
| VSIG6  | 0.678  | 0     |
| VSIG8  | 1.818  | 0.11  |
| VSIG9  | 2.139  | 0.42  |
| VSNL1  | 2.005  | 0     |
| VSTM1  | 1.019  | 0.29  |
| VSTM2  | 6.556  | 0     |
| VSX1   | 2.336  | 0     |
| VTCN1  | 1.795  | 0     |
| VTI1A  | 1.979  | 6.99  |
| VTI1B  | 1.277  | 6.35  |
| VTN    | 1.678  | 0.18  |
| VWA1   | 3.7    | 1.1   |
| VWA2   | 3.452  | 15.73 |
| VWC2   | 3.806  | 0     |
| VWCE   | 3.292  | 4.75  |
| VWF    | 8.833  | 0.09  |
| VWFP   | 14.375 | 0.04  |
| WAC    | 4.966  | 37.47 |
| WAPAL  | 6.302  | 6.55  |
| WARS   | 3.182  | 5.29  |
| WARS2  | 4.971  | 1.43  |
| WAS    | 1.805  | 20.11 |
| WASF1  | 3.22   | 2     |
| WASF2  | 5.487  | 79.91 |
| WASF3  | 4.834  | 0     |
| WASL   | 8.844  | 2.62  |
| WBP1   | 1.748  | 24.23 |
| WBP11  | 2.674  | 44.8  |
| WBP2   | 1.857  | 21.79 |
| WBP2NL | 2.255  | 0.18  |

|         |       |        |
|---------|-------|--------|
| WBP4    | 2.617 | 7.45   |
| WBP5    | 1.156 | 1.8    |
| WBSCR16 | 4.756 | 2.21   |
| WBSCR17 | 6.498 | 0      |
| WBSCR18 | 5.068 | 1.83   |
| WBSCR19 | 5.3   | 0.45   |
| WBSCR22 | 2.962 | 8.58   |
| WBSCR23 | 5.236 | 2.82   |
| WBSCR27 | 1.862 | 0.43   |
| WBSCR28 | 1.7   | 0      |
| WDFY1   | 4.607 | 4.76   |
| WDFY2   | 2.786 | 13.56  |
| WDFY3   | 16.36 | 1.11   |
| WDHD1   | 4.846 | 0.76   |
| WDR1    | 5.278 | 123.37 |
| WDR12   | 1.72  | 1.38   |
| WDR13   | 2.096 | 21.38  |
| WDR16   | 2.48  | 0      |
| WDR17   | 7.49  | 0      |
| WDR18   | 1.551 | 5.04   |
| WDR19   | 4.52  | 1.9    |
| WDR20   | 5.47  | 3.85   |
| WDR21A  | 2.665 | 1.23   |
| WDR21B  | 4.712 | 0.06   |
| WDR21C  | 3.318 | 0      |
| WDR22   | 5.815 | 9.8    |
| WDR23   | 4.474 | 3.98   |
| WDR24   | 3.165 | 4.16   |
| WDR25   | 2.004 | 0.64   |
| WDR26   | 6.236 | 25.93  |
| WDR27   | 3.178 | 2.52   |
| WDR3    | 3.858 | 0.72   |
| WDR31   | 2.874 | 0.2    |
| WDR32   | 3.088 | 1.02   |
| WDR33   | 9.462 | 5.59   |
| WDR34   | 1.818 | 9.47   |
| WDR35   | 6.949 | 2.31   |
| WDR36   | 6.592 | 1.9    |
| WDR37   | 4.611 | 26.46  |
| WDR4    | 2.331 | 1.99   |
| WDR40A  | 3.631 | 1.99   |
| WDR40B  | 3.379 | 0      |
| WDR40C  | 1.421 | 0      |
| WDR41   | 2.558 | 3.06   |
| WDR42A  | 6.953 | 27.25  |
| WDR42B  | 3.457 | 0.86   |
| WDR42C  | 1.854 | 0.37   |
| WDR44   | 4.141 | 3.16   |
| WDR45   | 2.156 | 11.89  |
| WDR45L  | 2.874 | 21.86  |

|         |       |       |
|---------|-------|-------|
| WDR45p  | 1.457 | 4.48  |
| WDR46   | 6.135 | 0     |
| WDR47   | 4.24  | 3.08  |
| WDR48   | 3.89  | 16.76 |
| WDR49   | 2.594 | 1.98  |
| WDR5    | 3.241 | 3.39  |
| WDR51A  | 1.889 | 0.73  |
| WDR51B  | 2.971 | 1.13  |
| WDR52   | 3.26  | 0.36  |
| WDR53   | 1.571 | 2.27  |
| WDR54   | 1.119 | 3.27  |
| WDR55   | 2.529 | 12.32 |
| WDR57   | 1.488 | 8.25  |
| WDR59   | 3.663 | 4.68  |
| WDR5B   | 4.183 | 0.78  |
| WDR6    | 4.07  | 26.62 |
| WDR60   | 7.532 | 2.1   |
| WDR61   | 1.191 | 7.47  |
| WDR62   | 4.688 | 1.2   |
| WDR63   | 2.991 | 0     |
| WDR64   | 2.31  | 0     |
| WDR65   | 3.012 | 0     |
| WDR66   | 3.739 | 2.68  |
| WDR67   | 3.502 | 0.31  |
| WDR68   | 6.564 | 5.65  |
| WDR69   | 1.669 | 0     |
| WDR7    | 7.282 | 0.72  |
| WDR70   | 2.122 | 4.71  |
| WDR71   | 1.585 | 2.75  |
| WDR72   | 5.887 | 0     |
| WDR73   | 1.83  | 6.11  |
| WDR74   | 2.047 | 20.54 |
| WDR75   | 2.674 | 7.51  |
| WDR76   | 2.524 | 1.45  |
| WDR77   | 2.408 | 2.18  |
| WDR78   | 4.042 | 0.03  |
| WDR79   | 1.834 | 2.11  |
| WDR8    | 1.657 | 3.47  |
| WDR81   | 3.951 | 9.14  |
| WDR85   | 3.045 | 18.72 |
| WDR86   | 5.665 | 16.19 |
| WDR87   | 8.034 | 0     |
| WDR89   | 3.22  | 1.29  |
| WDR90   | 5.541 | 3.57  |
| WDSOF1  | 2.161 | 4.26  |
| WDSUB1  | 1.812 | 4.81  |
| WDTC1   | 4.275 | 10.11 |
| WEE1    | 4.231 | 4.28  |
| WFDC1   | 1.378 | 0     |
| WFDC10A | 0.482 | 0     |

|         |        |       |
|---------|--------|-------|
| WFDC10B | 0.734  | 0     |
| WFDC11  | 0.615  | 0     |
| WFDC12  | 0.774  | 0     |
| WFDC13  | 1.372  | 0     |
| WFDC2   | 1.083  | 0.09  |
| WFDC3   | 1.186  | 0     |
| WFDC5   | 1.008  | 0     |
| WFDC6   | 0.619  | 0     |
| WFDC8   | 1.533  | 0     |
| WFDC9   | 0.659  | 0     |
| WFIKKN1 | 1.948  | 0     |
| WFIKKN2 | 3.519  | 0     |
| WFS1    | 4.323  | 33.76 |
| WHDC1   | 4.575  | 20.89 |
| WHDC1L1 | 1.996  | 1.98  |
| WHDC1L2 | 1.889  | 1.25  |
| WHSC1   | 18.853 | 4.01  |
| WHSC1L1 | 7.053  | 5.06  |
| WHSC2   | 2.246  | 10.79 |
| WIBG    | 1.226  | 5.56  |
| WIF1    | 1.978  | 0     |
| WIPF1   | 5.079  | 29.92 |
| WIPF2   | 5.525  | 4.96  |
| WIPF3   | 6.482  | 0     |
| WIP11   | 1.886  | 1.52  |
| WIP12   | 12.583 | 11.9  |
| WISP1   | 2.898  | 0     |
| WISP2   | 1.404  | 0     |
| WISP3   | 2.064  | 0     |
| WIT1    | 1.962  | 0.1   |
| WIZ     | 6.066  | 3.87  |
| WNK1    | 7.462  | 8.31  |
| WNK2    | 6.834  | 0     |
| WNK3    | 7.835  | 0.01  |
| WNK4    | 4.131  | 0.03  |
| WNT1    | 2.367  | 0.04  |
| WNT10A  | 2.375  | 0.04  |
| WNT10B  | 2.271  | 0.57  |
| WNT11   | 1.927  | 0.31  |
| WNT16   | 6.456  | 0.02  |
| WNT2    | 4.62   | 0.04  |
| WNT2B   | 2.214  | 0.22  |
| WNT3    | 1.497  | 0     |
| WNT3A   | 2.932  | 0     |
| WNT4    | 1.595  | 0     |
| WNT5A   | 5.838  | 0     |
| WNT5B   | 3.27   | 0     |
| WNT6    | 1.7    | 0     |
| WNT7A   | 1.714  | 0     |
| WNT7B   | 2.231  | 0     |

|        |        |        |
|--------|--------|--------|
| WNT8A  | 1.498  | 0.06   |
| WNT8B  | 2.112  | 0.14   |
| WNT9A  | 7.934  | 42     |
| WNT9B  | 1.464  | 0      |
| WRB    | 1.327  | 0.9    |
| WRN    | 5.746  | 3.18   |
| WRNIP1 | 2.986  | 9.68   |
| WSB1   | 3.087  | 18.46  |
| WSB2   | 2.822  | 7.15   |
| WT1    | 3.113  | 0.06   |
| WTAP   | 4.63   | 59.27  |
| WTIP   | 2.204  | 0.13   |
| WWC1   | 4.15   | 0      |
| WWC2   | 6.373  | 0      |
| WWC3   | 7.517  | 10.74  |
| WVOX   | 1.695  | 1.87   |
| WWP1   | 4.108  | 3.59   |
| WWP2   | 6.766  | 5.78   |
| WWTR1  | 1.997  | 1.19   |
| XAB1   | 1.794  | 13.4   |
| XAB2   | 3.117  | 47.39  |
| XAF1   | 3.626  | 1.72   |
| XAGE1  | 1.486  | 0      |
| XAGE2  | 0.713  | 0      |
| XAGE3  | 0.549  | 0      |
| XAGE5  | 0.477  | 0      |
| XBP1   | 1.82   | 129.06 |
| XBPP1  | 1.541  | 1.61   |
| XCL1   | 1.222  | 0.08   |
| XCL2   | 0.552  | 0.71   |
| XCR1   | 1.373  | 0      |
| XDH    | 5.717  | 0.02   |
| XG     | 2.291  | 0      |
| XIST   | 19.271 | 0      |
| XK     | 5.085  | 0      |
| XKR3   | 1.615  | 0      |
| XKR4   | 3.913  | 0.12   |
| XKR5   | 4.894  | 0      |
| XKR6   | 3.761  | 0.03   |
| XKR7   | 2.91   | 0      |
| XKR8   | 2.158  | 3.95   |
| XKR9   | 3.174  | 0      |
| XKRX   | 2.846  | 0      |
| XKRY   | 1.581  | 0      |
| XKRY2  | 1.581  | 0      |
| XKRYP1 | 1.797  | 0      |
| XKRYP2 | 1.797  | 0      |
| XKRYP3 | 1.799  | 0      |
| XKRYP4 | 1.799  | 0      |
| XKRYP5 | 1.799  | 0      |

|                  |        |       |
|------------------|--------|-------|
| XKRYP6           | 1.798  | 0     |
| XLKD1            | 2.413  | 0     |
| XPA              | 1.649  | 9.9   |
| XPC              | 3.691  | 4.96  |
| XPNPEP1          | 3.107  | 20    |
| XPNPEP2          | 3.333  | 1.6   |
| XPNPEP3          | 3.06   | 2.01  |
| XPO1             | 6.331  | 59.81 |
| XPO4             | 8.234  | 3.8   |
| XPO5             | 5.212  | 1.56  |
| XPO6             | 7.29   | 49.96 |
| XPO7             | 4.768  | 11.8  |
| XPOT             | 3.868  | 2.28  |
| XPOTP1           | 2.398  | 0.7   |
| XPR1             | 4.534  | 1.77  |
| XRCC1            | 2.087  | 10.76 |
| XRCC2            | 6.145  | 0.13  |
| XRCC3            | 4.17   | 19.67 |
| XRCC4            | 1.934  | 0.11  |
| XRCC5            | 3.304  | 29.73 |
| XRCC6            | 2.133  | 42.02 |
| XRCC6BP1         | 1.16   | 0.17  |
| XRN1             | 10.092 | 8.57  |
| XRN2             | 3.435  | 13.22 |
| XRRA1            | 7.27   | 2.72  |
| XTP3TPA          | 1.12   | 6.36  |
| XX-2136C111.3    | 0.809  | 0     |
| XXbac-BCX216M5.7 | 0.466  | 0     |
| XYLB             | 3.694  | 0     |
| XYLT1            | 5.254  | 5.33  |
| XYLT2            | 3.567  | 2.08  |
| YAF2             | 7.991  | 1.05  |
| YAP1             | 5.092  | 0     |
| YARS             | 4.482  | 42.85 |
| YARS2            | 2.179  | 4.36  |
| YBX1             | 2.94   | 64.41 |
| YBX1P1           | 1.555  | 5.66  |
| YBX2             | 1.57   | 0     |
| YDD19            | 1.025  | 0.1   |
| YEATS2           | 6.501  | 4.63  |
| YEATS4           | 1.385  | 4.36  |
| YES1             | 4.818  | 10.84 |
| YESP             | 4.777  | 0.74  |
| YIF1A            | 1.055  | 3.28  |
| YIF1B            | 1.814  | 6.38  |
| YIPF1            | 1.804  | 2.85  |
| YIPF2            | 1.504  | 10.39 |
| YIPF3            | 1.95   | 28.01 |
| YIPF4            | 1.875  | 4.17  |
| YIPF5            | 3.115  | 4.23  |

|         |        |        |
|---------|--------|--------|
| YIPF6   | 1.194  | 1.82   |
| YIPF7   | 1.239  | 0      |
| YKT6    | 5.532  | 10.07  |
| YLPM1   | 7.158  | 13.2   |
| YME1L1  | 4.221  | 18.73  |
| YME1L2  | 2.584  | 0      |
| YOD1    | 6.265  | 7.8    |
| YPEL1   | 4.285  | 4.96   |
| YPEL2   | 5.232  | 26.19  |
| YPEL3   | 1.782  | 82.61  |
| YPEL4   | 1.721  | 1.56   |
| YPEL5   | 2.181  | 143.03 |
| YRDC    | 1.836  | 4.52   |
| YSK4    | 4.165  | 0      |
| YTHDC1  | 8.619  | 31.2   |
| YTHDC2  | 6.286  | 3.9    |
| YTHDF1  | 3.253  | 18.86  |
| YTHDF1P | 2.719  | 0      |
| YTHDF2  | 2.713  | 20.05  |
| YTHDF2P | 2.11   | 1.45   |
| YTHDF3  | 5.093  | 11.98  |
| YWHAB   | 4.008  | 17.38  |
| YWHAE   | 3.671  | 14.91  |
| YWHAG   | 7.426  | 8.52   |
| YWHAH   | 2.997  | 26.8   |
| YWHAQ   | 2.416  | 107.99 |
| YWHAQP  | 0.905  | 0      |
| YWHAQP2 | 1.035  | 0.67   |
| YWHAZ   | 2.944  | 51.69  |
| YWHAZP1 | 0.988  | 0.1    |
| YWHAZP3 | 2.758  | 0.83   |
| YWHAZP4 | 1.034  | 3.83   |
| YY1     | 6.06   | 19.07  |
| YY1AP1  | 3.991  | 29.25  |
| YY2     | 1.119  | 0.8    |
| ZADH1   | 2.538  | 0.62   |
| ZADH2   | 4.133  | 8.45   |
| ZAK     | 9.859  | 1.34   |
| ZAN     | 17.616 | 0.03   |
| ZAP70   | 3.158  | 14.1   |
| ZAR1    | 2.775  | 6.74   |
| ZBED1   | 4.507  | 13.32  |
| ZBED2   | 2.187  | 0      |
| ZBED3   | 1.669  | 4.8    |
| ZBED4   | 5.218  | 9.31   |
| ZBED5   | 2.848  | 17.75  |
| ZBP1    | 2.195  | 0.81   |
| ZBTB1   | 3.99   | 6.43   |
| ZBTB10  | 4.485  | 8.84   |
| ZBTB11  | 5.043  | 4.34   |

|          |        |       |
|----------|--------|-------|
| ZBTB12   | 5.597  | 0     |
| ZBTB16   | 6.804  | 24.4  |
| ZBTB17   | 2.638  | 17.32 |
| ZBTB2    | 3.086  | 3.69  |
| ZBTB20   | 2.965  | 0.87  |
| ZBTB22   | 7.899  | 0.04  |
| ZBTB24   | 5.597  | 2.11  |
| ZBTB25   | 1.577  | 5.96  |
| ZBTB26   | 1.91   | 3.83  |
| ZBTB3    | 2.932  | 0.71  |
| ZBTB32   | 1.96   | 0.4   |
| ZBTB33   | 5.209  | 6.71  |
| ZBTB34   | 7.086  | 1.9   |
| ZBTB37   | 1.334  | 0.74  |
| ZBTB38   | 8.113  | 0.46  |
| ZBTB39   | 6.17   | 4.35  |
| ZBTB4    | 5.879  | 7.35  |
| ZBTB40   | 7.091  | 6.22  |
| ZBTB41   | 8.474  | 0.33  |
| ZBTB43   | 4.528  | 17.63 |
| ZBTB44   | 4.563  | 11.69 |
| ZBTB45   | 2.352  | 2.23  |
| ZBTB46   | 4.376  | 0.28  |
| ZBTB47   | 4.2    | 1.91  |
| ZBTB48   | 2.289  | 7.87  |
| ZBTB5    | 4.627  | 4.81  |
| ZBTB6    | 4.305  | 2.58  |
| ZBTB7A   | 4.441  | 4.66  |
| ZBTB7B   | 2.126  | 2.93  |
| ZBTB7C   | 3.774  | 0     |
| ZBTB8    | 7.333  | 2.71  |
| ZBTB8OS  | 0.717  | 4.01  |
| ZBTB9    | 2.712  | 1.64  |
| ZC3H10   | 2.121  | 1.64  |
| ZC3H11A  | 7.982  | 12.53 |
| ZC3H12A  | 2.682  | 5.13  |
| ZC3H12B  | 7.006  | 0.17  |
| ZC3H12C  | 10.333 | 0.11  |
| ZC3H12D  | 3.448  | 28.87 |
| ZC3H13   | 6.409  | 3.63  |
| ZC3H14   | 5.312  | 2.37  |
| ZC3H15   | 2.128  | 26.82 |
| ZC3H3    | 3.253  | 8.43  |
| ZC3H6    | 4.792  | 0.76  |
| ZC3H7A   | 4.275  | 33.1  |
| ZC3H7B   | 5.868  | 14.68 |
| ZC3H8    | 1.59   | 3.61  |
| ZC3HAV1  | 15.944 | 16.79 |
| ZC3HAV1L | 3.506  | 0.17  |
| ZC3HC1   | 3.828  | 1.79  |



|          |       |       |
|----------|-------|-------|
| ZCCHC10  | 2.122 | 4.57  |
| ZCCHC11  | 6.262 | 12.56 |
| ZCCHC12  | 2.197 | 0.13  |
| ZCCHC13  | 0.842 | 0     |
| ZCCHC14  | 8.031 | 8.56  |
| ZCCHC16  | 2.958 | 0     |
| ZCCHC17  | 1.602 | 8.95  |
| ZCCHC2   | 4.604 | 5.72  |
| ZCCHC23  | 1.951 | 0     |
| ZCCHC3   | 2.762 | 16.16 |
| ZCCHC4   | 4.203 | 1.23  |
| ZCCHC5   | 2.648 | 0     |
| ZCCHC6   | 5.951 | 4.04  |
| ZCCHC7   | 4.836 | 22.96 |
| ZCCHC8   | 2.864 | 11.99 |
| ZCCHC9   | 4.606 | 1.91  |
| ZCD1     | 0.898 | 0.99  |
| ZCD1B    | 0.697 | 0.14  |
| ZCD2     | 1.583 | 3.19  |
| ZCRB1    | 1.844 | 7.09  |
| ZCWPW1   | 4.674 | 0.84  |
| ZCWPW2   | 1.658 | 0     |
| ZDHHC1   | 2.041 | 1.56  |
| ZDHHC11  | 2.604 | 0.8   |
| ZDHHC11B | 1.774 | 0.5   |
| ZDHHC12  | 1.152 | 11.42 |
| ZDHHC13  | 2.711 | 0.51  |
| ZDHHC14  | 3.141 | 1.54  |
| ZDHHC15  | 1.782 | 0.94  |
| ZDHHC16  | 2.189 | 1.45  |
| ZDHHC17  | 5.259 | 9.55  |
| ZDHHC18  | 3.136 | 5.46  |
| ZDHHC19  | 1.337 | 0.82  |
| ZDHHC2   | 3.817 | 1.48  |
| ZDHHC20  | 2.543 | 12.56 |
| ZDHHC21  | 3.205 | 0.86  |
| ZDHHC22  | 3.077 | 0     |
| ZDHHC23  | 3.778 | 3.04  |
| ZDHHC24  | 1.317 | 6.68  |
| ZDHHC3   | 2.72  | 4.4   |
| ZDHHC4   | 6.355 | 9.65  |
| ZDHHC5   | 4.56  | 10.98 |
| ZDHHC6   | 2.462 | 9.04  |
| ZDHHC7   | 3.157 | 12.69 |
| ZDHHC8   | 3.455 | 6.1   |
| ZDHHC9   | 3.168 | 2.6   |
| ZEB1     | 4.148 | 28.67 |
| ZEB2     | 5.78  | 41.86 |
| ZER1     | 4.285 | 8.34  |
| ZFAND1   | 1.793 | 9.65  |

|            |        |        |
|------------|--------|--------|
| ZFAND2A    | 1.686  | 14.91  |
| ZFAND2B    | 1.291  | 8.59   |
| ZFAND3     | 3.005  | 49.42  |
| ZFAND5     | 5.819  | 65.22  |
| ZFAND6     | 1.68   | 13.49  |
| ZFAT1      | 8.024  | 0.8    |
| ZFHX2      | 5.675  | 0      |
| ZFHX4      | 12.103 | 0      |
| ZFP1       | 3.154  | 0.94   |
| ZFP106     | 10.457 | 2.96   |
| ZFP14      | 5.659  | 0.72   |
| ZFP161     | 2.896  | 1.75   |
| ZFP2       | 2.405  | 0.2    |
| ZFP28      | 4.087  | 1.09   |
| ZFP3       | 4.995  | 0.95   |
| ZFP30      | 4.611  | 1.03   |
| ZFP36      | 2.522  | 69.24  |
| ZFP36L1    | 3.022  | 17.81  |
| ZFP36L2    | 3.95   | 222.62 |
| ZFP37      | 2.752  | 0.54   |
| ZFP41      | 4.786  | 0.58   |
| ZFP42      | 2.646  | 0      |
| ZFP57      | 5.94   | 0      |
| ZFP62      | 4.053  | 0      |
| ZFP64      | 5.218  | 0.32   |
| ZFP90      | 4.651  | 2.38   |
| ZFP91      | 5.347  | 23.17  |
| ZFP91-CNTF | 0.1    | 0      |
| ZFPL1      | 1.386  | 11.71  |
| ZFPM1      | 3.345  | 1.33   |
| ZFPM2      | 4.48   | 0      |
| ZFR        | 4.715  | 17.52  |
| ZFX        | 5.811  | 4.57   |
| ZFY        | 4.556  | 3.32   |
| ZFYVE1     | 4.577  | 13.38  |
| ZFYVE16    | 6.277  | 1.86   |
| ZFYVE19    | 1.784  | 4.88   |
| ZFYVE20    | 6.678  | 3.26   |
| ZFYVE21    | 1.383  | 1.22   |
| ZFYVE26    | 9.669  | 3.27   |
| ZFYVE27    | 4.272  | 26.34  |
| ZFYVE28    | 4.11   | 0.34   |
| ZFYVE9     | 5.19   | 2.51   |
| ZG16       | 0.609  | 0      |
| ZGPAT      | 3.797  | 5.55   |
| ZH2C2      | 1.731  | 0.12   |
| ZHX1       | 5.106  | 2.73   |
| ZHX2       | 4.359  | 7.13   |
| ZHX3       | 9.991  | 20.77  |
| ZIC1       | 5.231  | 0      |

|          |        |       |
|----------|--------|-------|
| ZIC2     | 2.682  | 0.04  |
| ZIC3     | 3.939  | 0     |
| ZIC4     | 4.087  | 0     |
| ZIC5     | 2.421  | 0     |
| ZIK1     | 2.676  | 8.28  |
| ZIM2     | 2.083  | 0     |
| ZIM3     | 2.627  | 0     |
| ZKSCAN1  | 10.988 | 2.2   |
| ZKSCAN2  | 7.113  | 1.1   |
| ZKSCAN3  | 2.227  | 0.13  |
| ZKSCAN4  | 2.286  | 1.95  |
| ZKSCAN5  | 8.746  | 2.52  |
| ZMAT1    | 10.558 | 2.54  |
| ZMAT2    | 1.512  | 43.84 |
| ZMAT3    | 2.794  | 2.09  |
| ZMAT4    | 2.465  | 0     |
| ZMAT5    | 1.033  | 5.46  |
| ZMIZ1    | 7.041  | 27.26 |
| ZMIZ2    | 10.8   | 8.58  |
| ZMPSTE24 | 3.103  | 3     |
| ZMYM1    | 4.205  | 0.23  |
| ZMYM2    | 5.217  | 20.03 |
| ZMYM3    | 5.585  | 2.94  |
| ZMYM4    | 6.994  | 3.66  |
| ZMYM5    | 1.872  | 7.08  |
| ZMYM6    | 3.095  | 4.12  |
| ZMYND10  | 1.773  | 0     |
| ZMYND11  | 4.544  | 3.57  |
| ZMYND12  | 1.67   | 0.24  |
| ZMYND15  | 2.274  | 0.52  |
| ZMYND17  | 2.423  | 0.61  |
| ZMYND19  | 1.37   | 3.83  |
| ZMYND8   | 5.925  | 33.13 |
| ZNF10    | 4.405  | 2.81  |
| ZNF100   | 5.638  | 2.24  |
| ZNF101   | 1.45   | 13.78 |
| ZNF114   | 2.206  | 0.18  |
| ZNF117   | 2.744  | 2.2   |
| ZNF12    | 5.622  | 3.98  |
| ZNF121   | 1.729  | 6.12  |
| ZNF124   | 1.674  | 2.72  |
| ZNF131   | 2.415  | 11.19 |
| ZNF132   | 3.03   | 0.29  |
| ZNF133   | 2.665  | 3     |
| ZNF134   | 3.538  | 16.25 |
| ZNF135   | 3.025  | 0.95  |
| ZNF136   | 2.971  | 5.66  |
| ZNF137   | 2.484  | 0.56  |
| ZNF138   | 4.46   | 0.49  |
| ZNF14    | 2.963  | 2.01  |

|        |        |       |
|--------|--------|-------|
| ZNF140 | 3.067  | 1.81  |
| ZNF141 | 2.977  | 1.47  |
| ZNF142 | 6.234  | 2.4   |
| ZNF143 | 2.487  | 1.75  |
| ZNF146 | 3.18   | 10.33 |
| ZNF148 | 3.03   | 4.47  |
| ZNF154 | 1.59   | 3.3   |
| ZNF155 | 2.716  | 1.89  |
| ZNF157 | 2.008  | 0     |
| ZNF16  | 2.821  | 1.4   |
| ZNF160 | 5.276  | 9.5   |
| ZNF165 | 2.635  | 0.64  |
| ZNF167 | 3.976  | 0.15  |
| ZNF169 | 1.939  | 1.48  |
| ZNF17  | 2.524  | 1.06  |
| ZNF174 | 3.15   | 1.85  |
| ZNF175 | 3.785  | 1.83  |
| ZNF177 | 1.835  | 0.37  |
| ZNF179 | 3.085  | 0.22  |
| ZNF18  | 2.767  | 2.07  |
| ZNF180 | 3.1    | 1.15  |
| ZNF181 | 3.591  | 0.77  |
| ZNF182 | 3.641  | 4.4   |
| ZNF184 | 3.078  | 3.67  |
| ZNF185 | 3.598  | 0.22  |
| ZNF187 | 3.65   | 3.61  |
| ZNF189 | 3.698  | 2.84  |
| ZNF19  | 2.644  | 0.64  |
| ZNF192 | 5.362  | 12.05 |
| ZNF193 | 1.637  | 7.68  |
| ZNF195 | 2.287  | 9.34  |
| ZNF197 | 6.409  | 2.01  |
| ZNF2   | 4.081  | 0.1   |
| ZNF20  | 2.317  | 0.26  |
| ZNF200 | 4.438  | 0.93  |
| ZNF202 | 4.055  | 1.12  |
| ZNF204 | 17.712 | 0.04  |
| ZNF205 | 2.017  | 2.75  |
| ZNF207 | 4.713  | 41.55 |
| ZNF208 | 3.504  | 0     |
| ZNF211 | 2.452  | 5.81  |
| ZNF212 | 5.551  | 4.12  |
| ZNF213 | 3.202  | 1.45  |
| ZNF214 | 2.623  | 0     |
| ZNF215 | 3.658  | 0     |
| ZNF217 | 5.635  | 18.26 |
| ZNF219 | 3.04   | 9.18  |
| ZNF22  | 2.552  | 22.8  |
| ZNF221 | 2.535  | 0     |
| ZNF222 | 1.594  | 1.62  |

|         |        |       |
|---------|--------|-------|
| ZNF223  | 2.414  | 1.35  |
| ZNF224  | 2.466  | 4.45  |
| ZNF225  | 2.467  | 0.36  |
| ZNF226  | 3.538  | 1.42  |
| ZNF227  | 3.042  | 3.58  |
| ZNF228  | 3.656  | 0.52  |
| ZNF229  | 2.524  | 0     |
| ZNF23   | 3.243  | 1.1   |
| ZNF230  | 4.109  | 0.29  |
| ZNF232  | 2.078  | 1.62  |
| ZNF233  | 2.782  | 0.32  |
| ZNF234  | 2.357  | 0.25  |
| ZNF235  | 3.083  | 0.39  |
| ZNF236  | 8.124  | 2.68  |
| ZNF238  | 5.942  | 12.6  |
| ZNF239  | 2.386  | 0.5   |
| ZNF24   | 2.511  | 11.5  |
| ZNF248  | 4.883  | 1     |
| ZNF25   | 3.736  | 1.3   |
| ZNF250  | 2.15   | 0.92  |
| ZNF251  | 2.519  | 2.36  |
| ZNF253  | 2.329  | 1.27  |
| ZNF254  | 2.734  | 9.38  |
| ZNF256  | 2.21   | 13.3  |
| ZNF257  | 2.18   | 0.23  |
| ZNF259  | 1.778  | 8.3   |
| ZNF26   | 3.059  | 8.11  |
| ZNF260  | 5.391  | 1     |
| ZNF263  | 3.543  | 10.17 |
| ZNF264  | 6.594  | 1.35  |
| ZNF266  | 3.757  | 22.86 |
| ZNF267  | 3.191  | 4.27  |
| ZNF268  | 2.57   | 1.85  |
| ZNF271  | 2.191  | 5.51  |
| ZNF273  | 7.502  | 0.49  |
| ZNF274  | 3.584  | 10.91 |
| ZNF275  | 5.404  | 4.14  |
| ZNF276  | 3.804  | 10.48 |
| ZNF277P | 3.564  | 2.33  |
| ZNF28   | 4.675  | 0.66  |
| ZNF281  | 3.521  | 5.68  |
| ZNF282  | 7.465  | 2.65  |
| ZNF284  | 2.208  | 0.04  |
| ZNF285A | 2.674  | 0     |
| ZNF285B | 16.758 | 0.03  |
| ZNF286A | 2.515  | 0.87  |
| ZNF287  | 3.152  | 0     |
| ZNF289  | 3.065  | 49.65 |
| ZNF291  | 4.674  | 2.59  |
| ZNF292  | 10.996 | 15.84 |

|         |       |       |
|---------|-------|-------|
| ZNF294  | 7.703 | 2.62  |
| ZNF295  | 7.368 | 6.96  |
| ZNF299P | 1.468 | 0     |
| ZNF3    | 8.519 | 3.42  |
| ZNF30   | 2.583 | 0.42  |
| ZNF300  | 3.104 | 0.16  |
| ZNF302  | 2.795 | 3.08  |
| ZNF304  | 4.315 | 6.37  |
| ZNF311  | 8.094 | 0     |
| ZNF313  | 2.869 | 36.59 |
| ZNF317  | 4.051 | 20.49 |
| ZNF318  | 8.006 | 8.26  |
| ZNF319  | 4.22  | 2.58  |
| ZNF32   | 1.279 | 10.29 |
| ZNF320  | 6.145 | 0.86  |
| ZNF322A | 2.692 | 0.33  |
| ZNF322B | 2.374 | 0.29  |
| ZNF323  | 5.621 | 0.2   |
| ZNF324  | 3     | 1.61  |
| ZNF324B | 2.995 | 0.29  |
| ZNF326  | 5.914 | 20.8  |
| ZNF329  | 3.413 | 2.14  |
| ZNF330  | 1.843 | 12.13 |
| ZNF331  | 5.042 | 3.37  |
| ZNF333  | 3.767 | 3.23  |
| ZNF334  | 3.809 | 0.03  |
| ZNF335  | 4.452 | 5.64  |
| ZNF337  | 3.353 | 17.41 |
| ZNF33A  | 5.249 | 7.43  |
| ZNF33B  | 5.958 | 1.87  |
| ZNF34   | 2.038 | 0.92  |
| ZNF341  | 3.316 | 0.51  |
| ZNF342  | 1.586 | 8.55  |
| ZNF343  | 3.632 | 1.96  |
| ZNF345  | 3.119 | 1.24  |
| ZNF346  | 3.086 | 2.27  |
| ZNF347  | 3.502 | 0.26  |
| ZNF35   | 2.62  | 1.02  |
| ZNF350  | 2.341 | 14.11 |
| ZNF354A | 2.555 | 1.39  |
| ZNF354B | 2.141 | 2.12  |
| ZNF354C | 2.377 | 1.41  |
| ZNF358  | 1.882 | 9.62  |
| ZNF364  | 2.901 | 28.75 |
| ZNF365  | 7.476 | 0     |
| ZNF366  | 2.77  | 0     |
| ZNF367  | 1.691 | 4.68  |
| ZNF37A  | 7.116 | 3.44  |
| ZNF37B  | 0.701 | 1.97  |
| ZNF381P | 1.134 | 0     |

|         |        |       |
|---------|--------|-------|
| ZNF382  | 2.813  | 0.28  |
| ZNF383  | 1.694  | 3.1   |
| ZNF384  | 3.963  | 9.11  |
| ZNF385  | 2.404  | 5.93  |
| ZNF394  | 4.768  | 14.9  |
| ZNF395  | 4.802  | 45.86 |
| ZNF396  | 2.788  | 0.04  |
| ZNF397  | 1.42   | 1.88  |
| ZNF398  | 11.322 | 0.56  |
| ZNF402P | 3.496  | 0     |
| ZNF403  | 3.207  | 30.57 |
| ZNF404  | 1.709  | 0     |
| ZNF405P | 1.518  | 0     |
| ZNF407  | 3.48   | 1.48  |
| ZNF408  | 2.441  | 11.47 |
| ZNF41   | 3.533  | 0.42  |
| ZNF410  | 2.178  | 11.77 |
| ZNF414  | 1.178  | 3.44  |
| ZNF415  | 2.27   | 0.66  |
| ZNF416  | 2.509  | 2.44  |
| ZNF417  | 3.597  | 5.31  |
| ZNF418  | 3.694  | 1.61  |
| ZNF419  | 2.309  | 4.5   |
| ZNF420  | 2.984  | 0.36  |
| ZNF423  | 4.818  | 6.61  |
| ZNF425  | 6.701  | 2.96  |
| ZNF426  | 2.318  | 7.13  |
| ZNF428  | 1.387  | 29.1  |
| ZNF429  | 1.897  | 0.26  |
| ZNF43   | 5.217  | 2.18  |
| ZNF430  | 2.649  | 4.26  |
| ZNF431  | 3.798  | 3.64  |
| ZNF432  | 2.573  | 3.88  |
| ZNF433  | 2.321  | 1.15  |
| ZNF434  | 3.027  | 2.91  |
| ZNF436  | 3.788  | 3.55  |
| ZNF438  | 3.144  | 0.31  |
| ZNF439  | 2.55   | 3.37  |
| ZNF44   | 3.715  | 2.77  |
| ZNF440  | 3.533  | 2.05  |
| ZNF441  | 2.828  | 2.73  |
| ZNF442  | 2.797  | 0.25  |
| ZNF443  | 2.562  | 0.23  |
| ZNF444  | 2.043  | 4.99  |
| ZNF445  | 9.105  | 1.88  |
| ZNF446  | 1.974  | 2.36  |
| ZNF449  | 4.034  | 0.67  |
| ZNF45   | 3.153  | 1.07  |
| ZNF451  | 5.305  | 8     |
| ZNF452  | 7.805  | 0.05  |

|        |        |       |
|--------|--------|-------|
| ZNF454 | 2.3    | 0     |
| ZNF460 | 3.139  | 2.93  |
| ZNF461 | 3.192  | 1.27  |
| ZNF462 | 8.306  | 3.09  |
| ZNF467 | 5.087  | 12.85 |
| ZNF468 | 5.546  | 1.07  |
| ZNF469 | 13.203 | 0.05  |
| ZNF470 | 2.514  | 0.39  |
| ZNF471 | 4.967  | 0.62  |
| ZNF473 | 4.761  | 0.44  |
| ZNF474 | 1.957  | 0     |
| ZNF479 | 4.144  | 0     |
| ZNF480 | 4.717  | 1.49  |
| ZNF483 | 5.239  | 0.1   |
| ZNF484 | 3.248  | 3.56  |
| ZNF485 | 2.052  | 0.04  |
| ZNF486 | 4.268  | 0.51  |
| ZNF487 | 1.266  | 0.7   |
| ZNF488 | 3.496  | 0     |
| ZNF490 | 6.345  | 0.89  |
| ZNF491 | 2.823  | 0.28  |
| ZNF492 | 3.573  | 0.03  |
| ZNF493 | 4.209  | 0.64  |
| ZNF496 | 2.834  | 7.79  |
| ZNF497 | 3.466  | 0.92  |
| ZNF498 | 9.164  | 3.13  |
| ZNF500 | 3.252  | 3.8   |
| ZNF501 | 3.063  | 0.55  |
| ZNF502 | 3.27   | 1.18  |
| ZNF503 | 2.787  | 0     |
| ZNF506 | 4.425  | 3.75  |
| ZNF507 | 7.585  | 0.9   |
| ZNF508 | 5.388  | 35.13 |
| ZNF509 | 2.885  | 1.31  |
| ZNF510 | 5.154  | 2.19  |
| ZNF511 | 1.08   | 4.04  |
| ZNF512 | 3.426  | 6.96  |
| ZNF513 | 2.136  | 18.76 |
| ZNF514 | 3.204  | 3.34  |
| ZNF516 | 8.822  | 6.46  |
| ZNF517 | 2.536  | 2.42  |
| ZNF518 | 7.282  | 1.43  |
| ZNF519 | 1.968  | 0.9   |
| ZNF521 | 4.87   | 0.84  |
| ZNF524 | 1.109  | 2.76  |
| ZNF525 | 3.902  | 0.38  |
| ZNF526 | 3.954  | 1.78  |
| ZNF528 | 3.978  | 1.99  |
| ZNF529 | 4.466  | 4.32  |
| ZNF530 | 2.959  | 0.77  |



|        |        |       |
|--------|--------|-------|
| ZNF532 | 6.464  | 0.11  |
| ZNF533 | 3.123  | 0     |
| ZNF534 | 2.085  | 0     |
| ZNF536 | 4.935  | 0     |
| ZNF540 | 3.147  | 0.04  |
| ZNF541 | 2.944  | 0     |
| ZNF542 | 14.559 | 0.57  |
| ZNF543 | 3.755  | 2.21  |
| ZNF544 | 3.732  | 4.5   |
| ZNF545 | 2.616  | 0.84  |
| ZNF546 | 4.508  | 0.31  |
| ZNF547 | 2.776  | 1.53  |
| ZNF548 | 3.381  | 5.04  |
| ZNF549 | 3.969  | 1.15  |
| ZNF550 | 1.146  | 2.85  |
| ZNF551 | 3.663  | 6.75  |
| ZNF552 | 2.07   | 3.44  |
| ZNF553 | 2.203  | 1.12  |
| ZNF554 | 2.486  | 1.87  |
| ZNF555 | 2.062  | 1.35  |
| ZNF556 | 1.632  | 0     |
| ZNF557 | 1.362  | 1.24  |
| ZNF558 | 3.014  | 2.92  |
| ZNF559 | 3.042  | 0.81  |
| ZNF560 | 2.865  | 0     |
| ZNF561 | 3.394  | 4.08  |
| ZNF562 | 5.523  | 2.44  |
| ZNF563 | 2.754  | 0.11  |
| ZNF564 | 2.553  | 3.88  |
| ZNF565 | 2.506  | 0.6   |
| ZNF566 | 2.643  | 0.56  |
| ZNF567 | 2.689  | 2.28  |
| ZNF568 | 3.774  | 0.26  |
| ZNF569 | 4.059  | 0.49  |
| ZNF57  | 1.935  | 4.5   |
| ZNF570 | 2.247  | 0.52  |
| ZNF571 | 2.276  | 0.26  |
| ZNF572 | 3.26   | 0.52  |
| ZNF573 | 2.501  | 0     |
| ZNF574 | 3.601  | 3.16  |
| ZNF575 | 1.55   | 0.64  |
| ZNF576 | 1.468  | 1.08  |
| ZNF577 | 3.064  | 1.68  |
| ZNF578 | 1.723  | 0     |
| ZNF579 | 2.136  | 4.86  |
| ZNF580 | 2.173  | 16.53 |
| ZNF581 | 1.226  | 21.14 |
| ZNF582 | 2.297  | 0.26  |
| ZNF583 | 2.566  | 0.43  |
| ZNF584 | 2.261  | 0.39  |

|         |        |       |
|---------|--------|-------|
| ZNF585A | 4.194  | 0.81  |
| ZNF585B | 2.971  | 0.23  |
| ZNF586  | 2.163  | 17.11 |
| ZNF587  | 3.553  | 4.1   |
| ZNF588  | 11.016 | 3.74  |
| ZNF589  | 2.374  | 2.29  |
| ZNF592  | 5.39   | 17.84 |
| ZNF593  | 0.621  | 9.56  |
| ZNF594  | 4.863  | 0.12  |
| ZNF595  | 2.86   | 1.62  |
| ZNF596  | 2.598  | 0.35  |
| ZNF597  | 1.773  | 1.12  |
| ZNF598  | 3.197  | 7.24  |
| ZNF599  | 4.707  | 0.11  |
| ZNF600  | 3.816  | 1.07  |
| ZNF605  | 6.163  | 1.4   |
| ZNF606  | 4.226  | 1.69  |
| ZNF607  | 4.352  | 0.22  |
| ZNF608  | 5.645  | 4.69  |
| ZNF609  | 8.618  | 2.17  |
| ZNF610  | 1.983  | 2     |
| ZNF611  | 3.153  | 0.91  |
| ZNF613  | 2.625  | 0.76  |
| ZNF614  | 4.613  | 1.97  |
| ZNF615  | 4.033  | 1.48  |
| ZNF616  | 3.047  | 0.39  |
| ZNF618  | 2.992  | 0.89  |
| ZNF619  | 2.2    | 0.85  |
| ZNF620  | 2.102  | 1.08  |
| ZNF621  | 8.106  | 1.94  |
| ZNF622  | 1.692  | 15.5  |
| ZNF623  | 5.871  | 1.45  |
| ZNF624  | 4.232  | 0.89  |
| ZNF625  | 1.678  | 1.54  |
| ZNF626  | 1.126  | 1.58  |
| ZNF627  | 2.772  | 2.25  |
| ZNF628  | 3.843  | 1.16  |
| ZNF629  | 6.087  | 6.45  |
| ZNF630  | 2.561  | 0.43  |
| ZNF638  | 6.615  | 3.66  |
| ZNF639  | 3.013  | 7.58  |
| ZNF641  | 2.326  | 1.02  |
| ZNF642  | 2.159  | 0.19  |
| ZNF643  | 1.976  | 0.7   |
| ZNF644  | 5.888  | 5.68  |
| ZNF645  | 1.515  | 0.07  |
| ZNF646  | 6.183  | 1.86  |
| ZNF648  | 3.649  | 0     |
| ZNF649  | 3.169  | 0.87  |
| ZNF650  | 4.68   | 3     |

|         |        |       |
|---------|--------|-------|
| ZNF652  | 7.76   | 17.26 |
| ZNF653  | 2.152  | 0.42  |
| ZNF654  | 2.404  | 7.73  |
| ZNF655  | 23.955 | 3.5   |
| ZNF658  | 3.966  | 0     |
| ZNF658B | 3.375  | 0     |
| ZNF659  | 1.655  | 0     |
| ZNF66   | 2.1    | 0.14  |
| ZNF660  | 2.205  | 0.85  |
| ZNF662  | 3.919  | 0.03  |
| ZNF664  | 5.108  | 3.29  |
| ZNF665  | 3.478  | 0.14  |
| ZNF667  | 3.326  | 0.03  |
| ZNF668  | 2.625  | 3.32  |
| ZNF669  | 1.905  | 8.1   |
| ZNF670  | 2.005  | 10.32 |
| ZNF671  | 2.422  | 9.31  |
| ZNF672  | 2.936  | 12.87 |
| ZNF673  | 2.292  | 3.28  |
| ZNF674  | 2.689  | 0.85  |
| ZNF675  | 1.87   | 6.25  |
| ZNF676  | 2.091  | 0     |
| ZNF677  | 3.493  | 0.03  |
| ZNF678  | 2.525  | 0.67  |
| ZNF679  | 2.776  | 0     |
| ZNF680  | 6.052  | 0.35  |
| ZNF681  | 2.132  | 1.02  |
| ZNF682  | 1.495  | 1.46  |
| ZNF683  | 1.71   | 0.12  |
| ZNF684  | 2.094  | 0.94  |
| ZNF687  | 4.508  | 13.21 |
| ZNF688  | 2.125  | 1.72  |
| ZNF689  | 2.722  | 4.54  |
| ZNF69   | 1.438  | 1.17  |
| ZNF691  | 1.577  | 1.25  |
| ZNF692  | 1.931  | 2.46  |
| ZNF695  | 0.871  | 0.57  |
| ZNF696  | 2.691  | 0.29  |
| ZNF697  | 5.08   | 0.04  |
| ZNF7    | 2.353  | 6.64  |
| ZNF70   | 4.017  | 2.93  |
| ZNF700  | 2.865  | 9.6   |
| ZNF701  | 2.864  | 1.04  |
| ZNF702  | 2.996  | 0.06  |
| ZNF703  | 2.174  | 3     |
| ZNF704  | 4.844  | 4.82  |
| ZNF705A | 3.438  | 0.03  |
| ZNF705C | 26.169 | 0     |
| ZNF706  | 4.958  | 45.26 |
| ZNF707  | 2.218  | 5     |

|         |        |       |
|---------|--------|-------|
| ZNF708  | 4.003  | 1.49  |
| ZNF709  | 2.154  | 3.9   |
| ZNF71   | 3.105  | 0.77  |
| ZNF710  | 3.082  | 1.16  |
| ZNF711  | 4.126  | 6.86  |
| ZNF713  | 4.13   | 0.17  |
| ZNF714  | 2.692  | 0.3   |
| ZNF716  | 2.601  | 0     |
| ZNF718  | 2.149  | 0.23  |
| ZNF720  | 4.133  | 5.77  |
| ZNF721  | 4.492  | 2.75  |
| ZNF724P | 64.181 | 0.4   |
| ZNF738  | 3.61   | 0.88  |
| ZNF74   | 3.758  | 0.29  |
| ZNF740  | 2.352  | 4.29  |
| ZNF746  | 7.384  | 3.72  |
| ZNF747  | 2.371  | 1.71  |
| ZNF749  | 2.076  | 0.95  |
| ZNF75   | 5.538  | 1.18  |
| ZNF750  | 3.158  | 0.06  |
| ZNF75A  | 2.071  | 6.83  |
| ZNF75B  | 2.543  | 0     |
| ZNF76   | 2.653  | 4.84  |
| ZNF761  | 3.681  | 1.94  |
| ZNF763  | 2.639  | 1.09  |
| ZNF764  | 2.738  | 3.11  |
| ZNF765  | 4.577  | 0.95  |
| ZNF766  | 2.975  | 5.09  |
| ZNF767  | 7.04   | 2.58  |
| ZNF768  | 2.312  | 9.88  |
| ZNF77   | 2.001  | 1.83  |
| ZNF770  | 5.403  | 6.57  |
| ZNF771  | 1.899  | 0.84  |
| ZNF772  | 5.419  | 2.03  |
| ZNF773  | 2.203  | 3.64  |
| ZNF774  | 1.773  | 0.05  |
| ZNF775  | 4.46   | 1.26  |
| ZNF776  | 5.135  | 7.42  |
| ZNF777  | 3.524  | 4.29  |
| ZNF778  | 2.915  | 1.77  |
| ZNF780A | 1.824  | 0.49  |
| ZNF780B | 2.502  | 0.24  |
| ZNF781  | 3.078  | 0     |
| ZNF782  | 3.313  | 0.27  |
| ZNF783  | 6.299  | 5.08  |
| ZNF784  | 2.361  | 6.08  |
| ZNF785  | 3.183  | 1.03  |
| ZNF786  | 6.679  | 0.46  |
| ZNF787  | 1.928  | 20.89 |
| ZNF788  | 2.106  | 0.56  |

|         |       |       |
|---------|-------|-------|
| ZNF789  | 3.534 | 5.07  |
| ZNF79   | 2.077 | 1.81  |
| ZNF790  | 2.413 | 0.28  |
| ZNF791  | 2.474 | 5.68  |
| ZNF792  | 3.284 | 0.87  |
| ZNF793  | 2.412 | 0.25  |
| ZNF799  | 3.931 | 0.45  |
| ZNF8    | 2.21  | 6.44  |
| ZNF80   | 2.56  | 0.04  |
| ZNF800  | 8.444 | 3.72  |
| ZNF804A | 4.685 | 0     |
| ZNF804B | 9.176 | 0     |
| ZNF805  | 8.865 | 1.62  |
| ZNF808  | 1.147 | 0.95  |
| ZNF81   | 3.745 | 0.52  |
| ZNF813  | 3.571 | 0.52  |
| ZNF815  | 2.73  | 0.4   |
| ZNF816A | 2.697 | 1.02  |
| ZNF818  | 2.379 | 1.04  |
| ZNF83   | 2.764 | 15.22 |
| ZNF84   | 3.467 | 3.16  |
| ZNF85   | 2.296 | 1.98  |
| ZNF91   | 3.838 | 2.66  |
| ZNF92   | 6.712 | 0.96  |
| ZNF93   | 2.423 | 0.12  |
| ZNF99   | 3.111 | 0     |
| ZNFX1   | 7.321 | 18.98 |
| ZNHIT1  | 2.378 | 6.99  |
| ZNHIT2  | 1.296 | 3.51  |
| ZNHIT3  | 1.366 | 6.67  |
| ZNHIT4  | 1.685 | 24.42 |
| ZNRD1   | 3.029 | 0.39  |
| ZNRF1   | 4.633 | 0.64  |
| ZNRF2   | 6.92  | 5.49  |
| ZNRF3   | 6.989 | 0.1   |
| ZNRF4   | 1.426 | 0     |
| ZP1     | 1.972 | 0     |
| ZP2     | 2.266 | 0     |
| ZP3     | 2.9   | 1.37  |
| ZP4     | 1.635 | 0     |
| ZPBP    | 2.477 | 1     |
| ZPBP2   | 2.257 | 0     |
| ZPLD1   | 3.619 | 0     |
| ZRANB1  | 3.747 | 25    |
| ZRANB2  | 4.765 | 9.47  |
| ZRANB3  | 3.698 | 0.61  |
| ZRF1    | 4.424 | 5.03  |
| ZRF1PS  | 4.028 | 0.14  |
| ZRSR1   | 1.551 | 3.76  |
| ZRSR2   | 1.491 | 7.96  |

|         |        |       |
|---------|--------|-------|
| ZSCAN1  | 2.054  | 0     |
| ZSCAN10 | 2.463  | 0     |
| ZSCAN12 | 3.911  | 2.81  |
| ZSCAN16 | 1.276  | 5.43  |
| ZSCAN18 | 2.779  | 15.38 |
| ZSCAN2  | 4.406  | 2.29  |
| ZSCAN20 | 3.997  | 0.05  |
| ZSCAN21 | 3.978  | 0.82  |
| ZSCAN22 | 4.629  | 0.28  |
| ZSCAN29 | 2.556  | 2.98  |
| ZSCAN4  | 2.231  | 0.09  |
| ZSCAN5  | 1.922  | 0.2   |
| ZSWIM1  | 2.169  | 2.42  |
| ZSWIM2  | 2.446  | 0     |
| ZSWIM3  | 2.776  | 0.43  |
| ZSWIM4  | 5.075  | 3.2   |
| ZSWIM5  | 6.157  | 0.04  |
| ZSWIM6  | 5.545  | 2.98  |
| ZUBR1   | 16.132 | 13.75 |
| ZW10    | 2.884  | 1.51  |
| ZWILCH  | 2.832  | 0.8   |
| ZWINT   | 3.591  | 3.23  |
| ZXDA    | 2.871  | 4.1   |
| ZXDB    | 5.642  | 4.42  |
| ZXDC    | 2.648  | 6.68  |
| ZYG11A  | 2.428  | 0     |
| ZYG11B  | 6.404  | 1.46  |
| ZYX     | 4.636  | 12.14 |
| ZZEF1   | 11.859 | 7.13  |
| ZZZ3    | 4.325  | 2.36  |

## Relapse

| Gene ID | Transcript length (kb) | RPKM  |
|---------|------------------------|-------|
| 15E1.2  | 0.763                  | 12.36 |
| 3.8-1   | 3.537                  | 0.03  |
| 3.8-1.2 | 0.456                  | 0     |
| 3.8-1.3 | 1.166                  | 0     |
| 3.8-1.4 | 1.169                  | 0     |
| 3.8-1.5 | 3.517                  | 0.02  |
| 5-HT3c2 | 23.774                 | 0     |
| 76P     | 3.087                  | 4.2   |
| 7A5     | 6.372                  | 0     |
| A1BG    | 3.386                  | 2.59  |
| A2BP1   | 6.388                  | 0.01  |
| A2M     | 4.653                  | 13.74 |
| A2ML1   | 5.123                  | 0.05  |
| A2MP    | 2.707                  | 0.97  |
| A3GALT2 | 1.023                  | 0     |

|          |        |       |
|----------|--------|-------|
| A4GALT   | 2.092  | 0.85  |
| A4GNT    | 1.243  | 0     |
| AAA1     | 4.13   | 0     |
| AAAS     | 1.799  | 24.35 |
| AACP     | 1.969  | 0     |
| AACS     | 3.234  | 9.25  |
| AADAC    | 1.606  | 0     |
| AADACL1  | 4.289  | 0.53  |
| AADACL2  | 1.485  | 0     |
| AADACL3  | 1.266  | 0     |
| AADACL4  | 1.575  | 0     |
| AADAT    | 2.45   | 0     |
| AAK1     | 3.228  | 2.56  |
| AAMP     | 1.792  | 43.15 |
| AANAT    | 1.005  | 0.08  |
| AARS     | 3.344  | 34.11 |
| AARS2    | 4.073  | 6.66  |
| AARSD1   | 1.79   | 15.53 |
| AASDH    | 3.562  | 3.14  |
| AASDHPPT | 2.861  | 6.19  |
| AASS     | 6.466  | 1.39  |
| AATF     | 2.141  | 33.52 |
| AATK     | 5.843  | 0.02  |
| ABAT     | 4.871  | 0.69  |
| ABBA-1   | 4.977  | 7.24  |
| ABC1     | 3.924  | 2.86  |
| ABCA1    | 10.412 | 1.1   |
| ABCA10   | 6.33   | 0.03  |
| ABCA11   | 50.51  | 0.27  |
| ABCA12   | 9.366  | 0     |
| ABCA13   | 34.093 | 0.04  |
| ABCA2    | 8.36   | 5.74  |
| ABCA3    | 6.467  | 0.08  |
| ABCA4    | 7.3    | 0.03  |
| ABCA5    | 7.147  | 0.01  |
| ABCA6    | 5.296  | 0     |
| ABCA7    | 6.869  | 2.38  |
| ABCA8    | 5.721  | 0.01  |
| ABCA9    | 6.301  | 4.37  |
| ABCB1    | 9.744  | 0.03  |
| ABCB10   | 3.856  | 2.27  |
| ABCB10P  | 0.453  | 0     |
| ABCB11   | 4.775  | 0     |
| ABCB4    | 11.926 | 0.14  |
| ABCB5    | 5.812  | 0.03  |
| ABCB6    | 2.972  | 3.35  |
| ABCB7    | 2.387  | 9.98  |
| ABCB8    | 4.878  | 3.37  |
| ABCB9    | 6.199  | 1.24  |
| ABCC1    | 7.445  | 14.96 |

|         |        |       |
|---------|--------|-------|
| ABCC10  | 5.088  | 1.87  |
| ABCC11  | 4.926  | 0     |
| ABCC12  | 5.168  | 0     |
| ABCC13  | 34.516 | 0     |
| ABCC2   | 4.862  | 0.19  |
| ABCC3   | 5.156  | 0.07  |
| ABCC4   | 5.833  | 6.15  |
| ABCC5   | 7.062  | 3.08  |
| ABCC6   | 4.535  | 0.06  |
| ABCC8   | 4.977  | 0     |
| ABCC9   | 4.788  | 0     |
| ABCD1   | 3.616  | 6.76  |
| ABCD1P2 | 0.782  | 0     |
| ABCD1P3 | 0.785  | 0     |
| ABCD1P4 | 0.782  | 0     |
| ABCD2   | 3.944  | 0.08  |
| ABCD3   | 3.403  | 2.63  |
| ABCD4   | 6.249  | 9.1   |
| ABCE1   | 3.524  | 10.59 |
| ABCF1   | 10.394 | 0     |
| ABCF2   | 7.904  | 7.97  |
| ABCF3   | 2.547  | 15.71 |
| ABCG1   | 5.055  | 16.47 |
| ABCG2   | 4.431  | 0.51  |
| ABCG4   | 3.836  | 0     |
| ABCG5   | 2.74   | 0     |
| ABCG8   | 2.665  | 0     |
| ABHD1   | 1.446  | 0.18  |
| ABHD10  | 2.569  | 8.56  |
| ABHD11  | 6.888  | 0.1   |
| ABHD12  | 2.235  | 12.25 |
| ABHD13  | 5.302  | 1.26  |
| ABHD14A | 1.062  | 15.78 |
| ABHD14B | 1.816  | 78.07 |
| ABHD2   | 9.085  | 5.21  |
| ABHD3   | 2.024  | 4.37  |
| ABHD4   | 2.509  | 9.43  |
| ABHD5   | 1.428  | 1.42  |
| ABHD6   | 2.343  | 0.32  |
| ABHD7   | 1.418  | 0     |
| ABHD8   | 2.041  | 12.34 |
| ABHD9   | 1.81   | 0.19  |
| ABI1    | 3.668  | 18.6  |
| ABI1P   | 3.476  | 0.12  |
| ABI2    | 1.761  | 5.88  |
| ABI3    | 2.109  | 7.31  |
| ABI3BP  | 4.453  | 0.02  |
| ABL1    | 7.951  | 24.6  |
| ABL2    | 3.967  | 0.93  |
| ABLIM1  | 8.391  | 2.99  |



|        |        |        |
|--------|--------|--------|
| ABLIM2 | 3.393  | 0.03   |
| ABLIM3 | 4.256  | 0.08   |
| ABO    | 1.579  | 0      |
| ABP1   | 4.856  | 0.03   |
| ABR    | 5.402  | 8.67   |
| ABRA   | 1.321  | 0      |
| ABT1   | 2.255  | 16.18  |
| ABTB1  | 2.52   | 16.65  |
| ABTB2  | 4.149  | 0.79   |
| ACAA1  | 1.695  | 29.37  |
| ACAA2  | 1.584  | 32.76  |
| ACACA  | 12.805 | 2.9    |
| ACACB  | 9.241  | 0.62   |
| ACAD10 | 3.959  | 8.51   |
| ACAD11 | 3.504  | 7.46   |
| ACAD8  | 2.231  | 6.57   |
| ACAD9  | 2.454  | 12.74  |
| ACADL  | 2.424  | 0      |
| ACADM  | 2.192  | 19.44  |
| ACADS  | 1.82   | 7.64   |
| ACADSB | 5.836  | 0.97   |
| ACADV1 | 2.781  | 104.13 |
| ACAN   | 7.428  | 0      |
| ACAT1  | 1.518  | 24.52  |
| ACAT2  | 1.455  | 7.24   |
| ACBD3  | 3.565  | 7.96   |
| ACBD4  | 1.979  | 4.26   |
| ACBD5  | 2.286  | 3.36   |
| ACBD6  | 1.499  | 17.53  |
| ACBD7  | 2.379  | 0.64   |
| ACCN1  | 3.443  | 0      |
| ACCN2  | 4.008  | 0.14   |
| ACCN3  | 4.202  | 0.34   |
| ACCN4  | 2.741  | 0      |
| ACCN5  | 1.692  | 0      |
| ACD    | 2.034  | 14.5   |
| ACE    | 7.288  | 0.08   |
| ACE2   | 3.393  | 0      |
| ACF    | 0.1    | 0      |
| ACHE   | 6.598  | 0.25   |
| ACIN1  | 5.985  | 49.77  |
| ACLY   | 4.353  | 37.68  |
| ACMSD  | 1.305  | 0.07   |
| ACN9   | 1.89   | 2.18   |
| ACO1   | 3.497  | 3.37   |
| ACO2   | 2.741  | 48.62  |
| ACOT1  | 1.603  | 1.42   |
| ACOT11 | 3.292  | 0      |
| ACOT12 | 1.821  | 0      |
| ACOT2  | 1.76   | 10.96  |

|         |       |        |
|---------|-------|--------|
| ACOT4   | 1.632 | 0.1    |
| ACOT6   | 1.004 | 0      |
| ACOT7   | 2.389 | 7.01   |
| ACOT8   | 1.618 | 12.02  |
| ACOT9   | 1.727 | 6.25   |
| ACOX1   | 7.675 | 5.91   |
| ACOX2   | 2.296 | 0      |
| ACOX3   | 2.411 | 5.03   |
| ACOXL   | 2.007 | 0      |
| ACP1    | 1.639 | 35     |
| ACP2    | 2.109 | 6.31   |
| ACP5    | 1.415 | 0.71   |
| ACP6    | 1.788 | 2.26   |
| ACPL2   | 3.181 | 0.08   |
| ACPP    | 3.085 | 0.19   |
| ACPT    | 1.867 | 0      |
| ACR     | 1.375 | 0.18   |
| ACRBP   | 1.886 | 1.11   |
| ACRC    | 2.791 | 0.66   |
| ACRV1   | 2.638 | 0.07   |
| ACSBG1  | 2.83  | 0.21   |
| ACSBG2  | 2.712 | 0.06   |
| ACSL1   | 3.805 | 1.06   |
| ACSL3   | 4.361 | 7.61   |
| ACSL4   | 5.572 | 3.28   |
| ACSL5   | 3.929 | 22.17  |
| ACSL6   | 3.125 | 0.19   |
| ACSM1   | 1.945 | 0.04   |
| ACSM2   | 1.988 | 0      |
| ACSM3   | 2.372 | 1.35   |
| ACSS1   | 4.473 | 32.77  |
| ACSS2   | 3.221 | 11.24  |
| ACTA1   | 1.493 | 0.17   |
| ACTA2   | 1.33  | 2.66   |
| ACTB    | 3.588 | 864.74 |
| ACTBL1  | 2.124 | 0      |
| ACTBP2  | 1.78  | 102.74 |
| ACTBP4  | 1.742 | 0.63   |
| ACTBP7  | 1.121 | 14.73  |
| ACTBP8  | 1.661 | 1.32   |
| ACTC1   | 1.493 | 0.06   |
| ACTG1   | 1.919 | 1111.7 |
| ACTG2   | 1.331 | 0.19   |
| ACTGP1  | 1.951 | 0.6    |
| ACTGP10 | 0.909 | 0.47   |
| ACTGP2  | 2.102 | 2.85   |
| ACTGP3  | 1.114 | 0.31   |
| ACTGP9  | 1.651 | 2.75   |
| ACTL6A  | 2.335 | 14.43  |
| ACTL6B  | 2.99  | 0.51   |

|         |       |        |
|---------|-------|--------|
| ACTL7A  | 1.433 | 0      |
| ACTL7B  | 1.34  | 0      |
| ACTL8   | 1.825 | 0      |
| ACTN1   | 3.398 | 45.69  |
| ACTN2   | 4.181 | 0      |
| ACTN3   | 2.857 | 0      |
| ACTN4   | 3.893 | 165.27 |
| ACTR10  | 1.587 | 9.61   |
| ACTR1A  | 2.823 | 28.92  |
| ACTR1B  | 2.052 | 35.51  |
| ACTR2   | 3.861 | 72.02  |
| ACTR3   | 2.712 | 41.16  |
| ACTR3B  | 4.398 | 0.87   |
| ACTR5   | 2.224 | 4.28   |
| ACTR6   | 1.755 | 3.55   |
| ACTR8   | 3.525 | 5.18   |
| ACTRT1  | 1.437 | 0.06   |
| ACTRT2  | 1.422 | 0      |
| ACVR1   | 2.951 | 3.25   |
| ACVR1B  | 5.536 | 5.89   |
| ACVR1C  | 3.251 | 0      |
| ACVR2A  | 5.244 | 0.42   |
| ACVR2B  | 1.584 | 0.69   |
| ACVRL1  | 1.971 | 2.65   |
| ACY1    | 1.415 | 11.25  |
| ACY1L2  | 4.708 | 3.51   |
| ACY3    | 1.3   | 28.12  |
| ACYP1   | 1.129 | 11.27  |
| ACYP2   | 1.068 | 6.08   |
| ADA     | 1.532 | 106.28 |
| ADAL    | 1.559 | 2.65   |
| ADAM1   | 2.44  | 3.48   |
| ADAM10  | 4.367 | 23.8   |
| ADAM11  | 4.402 | 0.08   |
| ADAM12  | 6.395 | 0.04   |
| ADAM15  | 3.481 | 9.76   |
| ADAM17  | 3.572 | 3.07   |
| ADAM18  | 2.248 | 0      |
| ADAM19  | 7.074 | 2.67   |
| ADAM2   | 2.643 | 0      |
| ADAM20  | 2.792 | 0.09   |
| ADAM21  | 2.406 | 0.07   |
| ADAM21P | 1.908 | 0      |
| ADAM22  | 8.596 | 0.1    |
| ADAM23  | 3.056 | 0      |
| ADAM28  | 3.862 | 0      |
| ADAM29  | 3.275 | 0      |
| ADAM30  | 2.958 | 0      |
| ADAM32  | 2.606 | 0      |
| ADAM33  | 3.519 | 3.99   |

|          |        |       |
|----------|--------|-------|
| ADAM3A   | 74.183 | 0     |
| ADAM3B   | 0.577  | 0     |
| ADAM6    | 4.382  | 0     |
| ADAM7    | 2.57   | 0     |
| ADAM8    | 3.265  | 5.36  |
| ADAM9    | 5.896  | 0.65  |
| ADAMDEC1 | 2.175  | 0     |
| ADAMTS1  | 4.651  | 0     |
| ADAMTS10 | 4.237  | 0.86  |
| ADAMTS12 | 4.955  | 0     |
| ADAMTS13 | 5.81   | 0.26  |
| ADAMTS14 | 3.878  | 1.3   |
| ADAMTS15 | 2.853  | 0     |
| ADAMTS16 | 3.227  | 0     |
| ADAMTS17 | 3.448  | 0.03  |
| ADAMTS18 | 6.102  | 0.02  |
| ADAMTS19 | 5.089  | 0     |
| ADAMTS2  | 3.708  | 0.11  |
| ADAMTS20 | 6.337  | 0     |
| ADAMTS3  | 5.821  | 0.1   |
| ADAMTS4  | 4.331  | 1.38  |
| ADAMTS5  | 9.046  | 0     |
| ADAMTS6  | 7.268  | 0.12  |
| ADAMTS7  | 5.487  | 2.66  |
| ADAMTS8  | 4.012  | 0.04  |
| ADAMTS9  | 7.313  | 0     |
| ADAMTSL1 | 3.731  | 1.17  |
| ADAMTSL2 | 3.726  | 0     |
| ADAMTSL3 | 7.333  | 0     |
| ADAMTSL4 | 4.477  | 3.13  |
| ADAMTSL5 | 2.682  | 0.09  |
| ADAR     | 8.605  | 36.07 |
| ADARB1   | 10.69  | 0.1   |
| ADARB2   | 7.543  | 8.45  |
| ADAT1    | 2.727  | 3.37  |
| ADC      | 2.182  | 1.23  |
| ADCK1    | 2.183  | 4.55  |
| ADCK2    | 4.728  | 5.88  |
| ADCK4    | 2.253  | 6.73  |
| ADCK5    | 1.965  | 3.82  |
| ADCY1    | 25     | 0.01  |
| ADCY2    | 6.551  | 0.04  |
| ADCY3    | 4.651  | 17.42 |
| ADCY4    | 3.82   | 2.36  |
| ADCY5    | 4.91   | 6.47  |
| ADCY6    | 6.731  | 11.04 |
| ADCY7    | 6.142  | 8.13  |
| ADCY8    | 5.938  | 0     |
| ADCY9    | 7.725  | 5.35  |
| ADCYAP1  | 1.95   | 0     |

|           |        |        |
|-----------|--------|--------|
| ADCYAP1R1 | 3.286  | 0      |
| ADD1      | 6.212  | 41.6   |
| ADD2      | 7.587  | 0.55   |
| ADD3      | 4.628  | 15     |
| ADFP      | 1.98   | 103.89 |
| ADH1A     | 1.456  | 0      |
| ADH1B     | 2.666  | 0.29   |
| ADH1C     | 1.473  | 0      |
| ADH4      | 1.98   | 0.04   |
| ADH5      | 2.644  | 14.68  |
| ADH6      | 1.398  | 0      |
| ADH7      | 2.147  | 0      |
| ADHFE1    | 1.83   | 0.42   |
| ADI1      | 1.627  | 29.67  |
| ADIPOQ    | 4.578  | 0.11   |
| ADIPOR1   | 2.069  | 30.12  |
| ADIPOR2   | 3.965  | 26.68  |
| ADK       | 2.219  | 4.71   |
| ADLICANP  | 31.371 | 0      |
| ADM       | 1.449  | 0.88   |
| ADM2      | 4.05   | 0.6    |
| ADMR      | 1.57   | 0.11   |
| ADNP      | 5.044  | 19.26  |
| ADORA1    | 2.86   | 0      |
| ADORA2A   | 2.388  | 5.4    |
| ADORA2B   | 1.885  | 0.63   |
| ADORA2BP  | 1.779  | 0      |
| ADORA3    | 3.408  | 0.17   |
| ADPGK     | 2.492  | 21.37  |
| ADPRH     | 3.439  | 1.05   |
| ADPRHL1   | 2.891  | 1.34   |
| ADPRHL2   | 1.658  | 15.45  |
| ADPRTL4   | 23.596 | 0.03   |
| ADRA1A    | 4.146  | 0      |
| ADRA1B    | 2.346  | 27.04  |
| ADRA1D    | 2.128  | 0      |
| ADRA2A    | 3.65   | 0      |
| ADRA2B    | 3.266  | 0.05   |
| ADRA2C    | 1.958  | 0.08   |
| ADRB1     | 1.723  | 0      |
| ADRB2     | 2.011  | 0.17   |
| ADRB3     | 2.644  | 0      |
| ADRBK1    | 3.602  | 171.74 |
| ADRBK2    | 3.628  | 0.05   |
| ADRM1     | 1.48   | 47.64  |
| ADSL      | 1.681  | 36.33  |
| ADSS      | 2.757  | 8.74   |
| ADSSL1    | 2.078  | 1.01   |
| ADTB1L1   | 0.191  | 0      |
| ADTB1L2   | 0.102  | 0      |

|          |        |        |
|----------|--------|--------|
| AEBP1    | 8.161  | 31.04  |
| AEBP2    | 4.041  | 5.48   |
| AES      | 2.162  | 241.68 |
| AF357530 | 0.8    | 5.58   |
| AF357532 | 0.8    | 0.21   |
| AF357533 | 1.1    | 0      |
| AF357534 | 0.85   | 0.5    |
| AFAP1    | 7.668  | 0.41   |
| AFAP1L1  | 4.153  | 20.99  |
| AFAP1L2  | 4.965  | 22.66  |
| AFAR3    | 1.984  | 0.08   |
| AFARP1   | 1.324  | 4.58   |
| AFF1     | 9.391  | 7.4    |
| AFF2     | 13.746 | 0.99   |
| AFF3     | 8.213  | 10.25  |
| AFF4     | 9.528  | 2.83   |
| AFG3L1   | 5.419  | 5.19   |
| AFG3L2   | 2.963  | 13.27  |
| AFM      | 1.997  | 0      |
| AFMID    | 1.7    | 7.78   |
| AFP      | 2.032  | 0      |
| AFTPH    | 4.246  | 8.07   |
| AGA      | 2.041  | 1.9    |
| AGBL1    | 2.255  | 0      |
| AGBL2    | 3.391  | 0.25   |
| AGBL3    | 5.938  | 0.02   |
| AGBL4    | 3.938  | 0.03   |
| AGER     | 5.994  | 0      |
| AGGF1    | 4.466  | 4.41   |
| AGK      | 5.558  | 3.62   |
| AGL      | 8.713  | 0.58   |
| AGMAT    | 2.196  | 0.04   |
| AGPAT1   | 6.897  | 0      |
| AGPAT2   | 1.548  | 28.03  |
| AGPAT3   | 6.609  | 7.43   |
| AGPAT4   | 14.78  | 2.85   |
| AGPAT5   | 3.684  | 6.33   |
| AGPAT6   | 2.592  | 14.66  |
| AGPAT7   | 1.908  | 14.66  |
| AGPS     | 3.71   | 13.53  |
| AGR2     | 3.364  | 0      |
| AGR3     | 1.5    | 0      |
| AGRN     | 7.319  | 12.22  |
| AGRP     | 0.764  | 0      |
| AGT      | 2.189  | 0      |
| AGTPBP1  | 4.218  | 4.38   |
| AGTR1    | 2.573  | 0      |
| AGTR2    | 2.449  | 0      |
| AGTRAP   | 3.041  | 11.63  |
| AGTRL1   | 3.847  | 0.04   |

|         |        |        |
|---------|--------|--------|
| AGXT    | 1.599  | 0      |
| AGXT2   | 2.165  | 0      |
| AGXT2L1 | 2.099  | 0      |
| AGXT2L2 | 2.826  | 23.04  |
| AHCTF1  | 8.516  | 2.1    |
| AHCTF1P | 7.176  | 1.29   |
| AHCY    | 2.11   | 116.25 |
| AHCYL1  | 3.893  | 20.04  |
| AHDC1   | 5.959  | 16.83  |
| AHI1    | 5.529  | 0.75   |
| AHNAK   | 19.263 | 11.88  |
| AHR     | 11.628 | 1.85   |
| AHRR    | 2.48   | 0.14   |
| AHSA1   | 1.371  | 87.49  |
| AHSA2   | 2.137  | 10.32  |
| AHSG    | 1.534  | 0      |
| AICDA   | 2.791  | 1.42   |
| AIF1    | 6.222  | 0      |
| AIFM1   | 2.346  | 14.5   |
| AIFM2   | 3.24   | 0.73   |
| AIFM3   | 2.721  | 0      |
| AIG1    | 1.385  | 0.73   |
| AIM1    | 7.548  | 2.68   |
| AIM1L   | 1.831  | 0      |
| AIM2    | 1.484  | 0      |
| AIP     | 1.212  | 79.58  |
| AIPL1   | 2.971  | 0      |
| AIRE    | 3.16   | 0      |
| AJAP1   | 2.922  | 0      |
| AK1     | 2.277  | 33.66  |
| AK2     | 5.046  | 46.05  |
| AK2B    | 1.978  | 17     |
| AK3     | 2.642  | 13.36  |
| AK3L1   | 2.669  | 0.09   |
| AK3L2   | 0.672  | 0      |
| AK3P1   | 0.672  | 0.13   |
| AK5     | 4.44   | 0      |
| AK7     | 2.649  | 0      |
| AKAP1   | 3.799  | 11.27  |
| AKAP10  | 2.917  | 2.71   |
| AKAP11  | 15.075 | 1.47   |
| AKAP12  | 7.843  | 1.35   |
| AKAP13  | 13.551 | 15.55  |
| AKAP14  | 1.006  | 0      |
| AKAP2   | 6.866  | 3.19   |
| AKAP3   | 3.02   | 0.2    |
| AKAP4   | 3.188  | 0      |
| AKAP5   | 2.601  | 0.03   |
| AKAP6   | 10.342 | 0      |
| AKAP7   | 3.121  | 1.27   |

|           |        |        |
|-----------|--------|--------|
| AKAP8     | 3.531  | 8.31   |
| AKAP8L    | 2.114  | 38.73  |
| AKAP9     | 28.573 | 0.73   |
| AKNA      | 5.549  | 64.49  |
| AKR1A1    | 1.535  | 77.54  |
| AKR1B1    | 2.796  | 35.88  |
| AKR1B10   | 3.07   | 0      |
| AKR1C1    | 1.379  | 0.06   |
| AKR1C2    | 1.59   | 0.05   |
| AKR1C3    | 1.224  | 3.44   |
| AKR1C4    | 1.194  | 0      |
| AKR1CL1   | 2.131  | 0      |
| AKR1CL2   | 1.61   | 0.05   |
| AKR1D1    | 5.384  | 0      |
| AKR1D1P   | 1.048  | 0      |
| AKR7A2    | 1.362  | 33.46  |
| AKR7A3    | 1.241  | 0.2    |
| AKT1      | 3.333  | 30.02  |
| AKT1S1    | 2.327  | 12.67  |
| AKT2      | 3.569  | 36.46  |
| AKT3      | 4.058  | 1.54   |
| AKTIP     | 2.334  | 2.24   |
| ALAD      | 3.54   | 12.97  |
| ALAS1     | 2.563  | 12.16  |
| ALAS2     | 2.367  | 14.06  |
| ALB       | 2.216  | 0      |
| ALCAM     | 4.741  | 3.36   |
| ALDH16A1  | 2.607  | 17.64  |
| ALDH18A1  | 3.616  | 20.11  |
| ALDH1A1   | 2.096  | 0.2    |
| ALDH1A2   | 3.563  | 0.03   |
| ALDH1A3   | 3.442  | 0.66   |
| ALDH1B1   | 3.025  | 1.22   |
| ALDH1L1   | 3.125  | 0      |
| ALDH1L2   | 2.794  | 0      |
| ALDH2     | 2.4    | 0.66   |
| ALDH3A1   | 1.641  | 0      |
| ALDH3A2   | 5.861  | 0.14   |
| ALDH3B1   | 2.815  | 2.1    |
| ALDH3B2   | 2.689  | 0.03   |
| ALDH4A1   | 3.56   | 5.58   |
| ALDH5A1   | 5.17   | 11.78  |
| ALDH6A1   | 2.183  | 4.01   |
| ALDH7A1   | 1.882  | 16.07  |
| ALDH7A1P1 | 1.816  | 10.81  |
| ALDH8A1   | 2.542  | 0.07   |
| ALDH9A1   | 2.696  | 11.18  |
| ALDOA     | 2.736  | 234.08 |
| ALDOAP1   | 1.97   | 7.83   |
| ALDOAP2   | 1.076  | 48.62  |



|          |        |       |
|----------|--------|-------|
| ALDOB    | 1.653  | 0.05  |
| ALDOC    | 1.651  | 19.9  |
| ALDRP    | 1.596  | 2.69  |
| ALF      | 1.924  | 0     |
| ALG1     | 2.132  | 7     |
| ALG10    | 3.128  | 0.81  |
| ALG10B   | 1.763  | 0.76  |
| ALG11    | 2.538  | 2.09  |
| ALG12    | 2.375  | 15.5  |
| ALG13    | 1.327  | 3.37  |
| ALG14    | 1.015  | 3.07  |
| ALG2     | 2.83   | 4.1   |
| ALG3     | 1.52   | 33.81 |
| ALG5     | 1.127  | 11.21 |
| ALG6     | 1.979  | 4.34  |
| ALG8     | 1.997  | 9.49  |
| ALG9     | 2.07   | 5.25  |
| ALK      | 6.22   | 0     |
| ALKBH1   | 4.512  | 0.82  |
| ALKBH2   | 0.996  | 7.27  |
| ALKBH3   | 1.519  | 10.93 |
| ALKBH4   | 4.14   | 2.16  |
| ALKBH5   | 2.963  | 41.9  |
| ALKBH6   | 1.239  | 4.76  |
| ALKBH7   | 1.11   | 28.83 |
| ALKBH8   | 1.677  | 2.21  |
| ALLC     | 2.747  | 0     |
| ALMS1    | 12.922 | 1.04  |
| ALOX12   | 2.335  | 0.76  |
| ALOX12B  | 2.471  | 0     |
| ALOX12P1 | 0.431  | 0     |
| ALOX12P2 | 52.658 | 0.02  |
| ALOX15   | 2.684  | 0.03  |
| ALOX15B  | 2.873  | 0.03  |
| ALOX5    | 2.554  | 9.86  |
| ALOX5AP  | 0.873  | 12.35 |
| ALOXE3   | 3.362  | 0     |
| ALPI     | 2.516  | 0     |
| ALPK1    | 4.28   | 2.14  |
| ALPK2    | 6.483  | 0.02  |
| ALPK3    | 10.914 | 0.06  |
| ALPL     | 2.582  | 0.32  |
| ALPP     | 2.867  | 0     |
| ALPPL2   | 2.486  | 0     |
| ALS2     | 6.47   | 1.24  |
| ALS2CL   | 5.048  | 0.69  |
| ALS2CR11 | 2.104  | 0     |
| ALS2CR12 | 1.78   | 0.05  |
| ALS2CR13 | 5.463  | 1.57  |
| ALS2CR16 | 0.883  | 0     |

|          |       |       |
|----------|-------|-------|
| ALS2CR2  | 2.174 | 3.76  |
| ALS2CR4  | 2.076 | 1.83  |
| ALS2CR7  | 1.534 | 0     |
| ALS2CR8  | 3.44  | 1.2   |
| ALX3     | 1.771 | 0.48  |
| ALX4     | 1.586 | 0     |
| AMAC1    | 1.839 | 0.04  |
| AMAC1L1  | 1.201 | 0     |
| AMAC1L2  | 1.201 | 0     |
| AMAC1L3  | 1.195 | 0.07  |
| AMACR    | 4.247 | 1.98  |
| AMBN     | 1.977 | 0.08  |
| AMBP     | 1.397 | 0     |
| AMD1     | 3.895 | 16.91 |
| AMDHD1   | 2.135 | 0     |
| AMDHD2   | 1.521 | 2.77  |
| AMDP1    | 1.569 | 0     |
| AMELX    | 0.835 | 0     |
| AMELY    | 0.802 | 0     |
| AMFR     | 3.594 | 28.34 |
| AMH      | 2.008 | 0.3   |
| AMHR2    | 1.855 | 0     |
| AMICA1   | 1.959 | 0.52  |
| AMIGO1   | 2.439 | 1     |
| AMIGO2   | 3.763 | 0.04  |
| AMIGO3   | 2.159 | 4.44  |
| AMMECR1  | 5.417 | 1.14  |
| AMMECR1L | 4.648 | 4.35  |
| AMN      | 1.896 | 1.02  |
| AMN1     | 1.966 | 1.33  |
| AMOT     | 6.514 | 2.47  |
| AMOTL1   | 8.999 | 3.27  |
| AMOTL2   | 4.984 | 0.34  |
| AMPD1    | 2.341 | 0     |
| AMPD2    | 4.711 | 8.34  |
| AMPD3    | 5.396 | 2.84  |
| AMPH     | 6.542 | 0     |
| AMT      | 2.103 | 2.12  |
| AMTN     | 0.996 | 0     |
| AMY1A    | 2.03  | 0     |
| AMY1B    | 1.838 | 0     |
| AMY1C    | 1.86  | 0     |
| AMY2A    | 1.632 | 0     |
| AMY2B    | 2.181 | 0.62  |
| AMYP1    | 6.17  | 0     |
| AMZ1     | 8.83  | 0.07  |
| AMZ2     | 2.246 | 15.94 |
| ANAPC1   | 6.312 | 5.1   |
| ANAPC10  | 0.918 | 6.33  |
| ANAPC11  | 2.156 | 19.66 |

|           |        |       |
|-----------|--------|-------|
| ANAPC13   | 1.17   | 14.91 |
| ANAPC2    | 2.7    | 16.28 |
| ANAPC4    | 2.672  | 3.5   |
| ANAPC5    | 2.45   | 47.93 |
| ANAPC7    | 2.348  | 18.51 |
| ANG       | 0.789  | 0.96  |
| ANGEL1    | 4.058  | 12.43 |
| ANGEL2    | 4.649  | 2.16  |
| ANGPT1    | 4.338  | 0     |
| ANGPT2    | 2.227  | 0.68  |
| ANGPT4    | 1.922  | 0.04  |
| ANGPTL1   | 3.546  | 0     |
| ANGPTL2   | 3.572  | 6.34  |
| ANGPTL3   | 2.126  | 0     |
| ANGPTL4   | 1.903  | 0.84  |
| ANGPTL5   | 2.37   | 0     |
| ANGPTL6   | 1.857  | 2.13  |
| ANGPTL7   | 2.238  | 0     |
| ANK1      | 12.022 | 0.76  |
| ANK2      | 14.15  | 0     |
| ANK3      | 15.717 | 0     |
| ANKAR     | 4.109  | 0.16  |
| ANKDD1A   | 2.802  | 0.42  |
| ANKFN1    | 2.426  | 0     |
| ANKFY1    | 8.089  | 4.34  |
| ANKH      | 4.086  | 0.68  |
| ANKHD1    | 8.554  | 6.22  |
| ANKIB1    | 13.01  | 1.44  |
| ANKK1     | 2.543  | 0     |
| ANKMY1    | 3.595  | 3.99  |
| ANKMY2    | 5      | 2.42  |
| ANKRA2    | 2.047  | 4.4   |
| ANKRD1    | 1.974  | 0     |
| ANKRD10   | 3.892  | 21.62 |
| ANKRD11   | 10.289 | 10.3  |
| ANKRD12   | 9.036  | 1.99  |
| ANKRD13A  | 3.91   | 14    |
| ANKRD13B  | 2.632  | 1.31  |
| ANKRD13C  | 2.799  | 2.35  |
| ANKRD13D  | 2.219  | 17.34 |
| ANKRD15   | 8.075  | 2.48  |
| ANKRD16   | 2.49   | 6.16  |
| ANKRD17   | 9.375  | 11.06 |
| ANKRD18A  | 2.421  | 0     |
| ANKRD18B  | 4.327  | 0     |
| ANKRD19   | 2.234  | 21.15 |
| ANKRD2    | 1.451  | 0     |
| ANKRD20A1 | 3.511  | 0     |
| ANKRD20A2 | 3.511  | 0     |
| ANKRD20A3 | 3.964  | 0     |

|          |         |        |
|----------|---------|--------|
| ANKRD20B | 100.107 | 0      |
| ANKRD21  | 1.826   | 0      |
| ANKRD22  | 1.127   | 0.15   |
| ANKRD23  | 2.582   | 0.55   |
| ANKRD24  | 3.861   | 0.26   |
| ANKRD25  | 5.188   | 25.81  |
| ANKRD26  | 5.36    | 0.83   |
| ANKRD27  | 4.423   | 3.54   |
| ANKRD28  | 6.339   | 4.53   |
| ANKRD29  | 2.276   | 0.59   |
| ANKRD30A | 4.458   | 0      |
| ANKRD30B | 3.429   | 0      |
| ANKRD31  | 6.036   | 0      |
| ANKRD32  | 1.854   | 1.73   |
| ANKRD33  | 1.935   | 0      |
| ANKRD34  | 3.612   | 0.42   |
| ANKRD35  | 3.323   | 0.03   |
| ANKRD36  | 2.905   | 0.17   |
| ANKRD37  | 0.934   | 2.25   |
| ANKRD38  | 4.493   | 0      |
| ANKRD39  | 0.837   | 9.87   |
| ANKRD40  | 2.312   | 13.26  |
| ANKRD41  | 2.907   | 3.25   |
| ANKRD42  | 2.302   | 0.4    |
| ANKRD43  | 3.2     | 0      |
| ANKRD44  | 3.908   | 2.46   |
| ANKRD45  | 2.671   | 0.13   |
| ANKRD46  | 2.779   | 1.43   |
| ANKRD47  | 2.786   | 1.03   |
| ANKRD49  | 1.905   | 4.74   |
| ANKRD5   | 3.823   | 0      |
| ANKRD50  | 7.763   | 0.59   |
| ANKRD53  | 1.962   | 0.08   |
| ANKRD54  | 2.049   | 8.97   |
| ANKRD55  | 2.837   | 0.06   |
| ANKRD56  | 2.921   | 0      |
| ANKRD57  | 4.673   | 0.02   |
| ANKRD58  | 1.725   | 12.8   |
| ANKRD6   | 2.969   | 0.65   |
| ANKRD7   | 2.126   | 0      |
| ANKRD9   | 1.626   | 0.72   |
| ANKS1A   | 6.348   | 3.83   |
| ANKS1B   | 6.543   | 0.09   |
| ANKS3    | 2.662   | 2.5    |
| ANKS4B   | 2.906   | 0      |
| ANKS6    | 7.147   | 2.77   |
| ANKZF1   | 2.496   | 15.8   |
| ANLN     | 9.54    | 0.91   |
| ANP32A   | 2.101   | 100.39 |
| ANP32B   | 1.461   | 180    |

|         |        |        |
|---------|--------|--------|
| ANP32C  | 0.705  | 7.53   |
| ANP32D  | 0.396  | 2.55   |
| ANP32E  | 3.269  | 15.72  |
| ANPEP   | 3.478  | 0.94   |
| ANTXR1  | 6.746  | 0.59   |
| ANTXR2  | 4.117  | 45.32  |
| ANTXRL  | 1.946  | 0.04   |
| ANUBL1  | 3.241  | 1.27   |
| ANXA1   | 1.399  | 2.83   |
| ANXA10  | 1.428  | 0      |
| ANXA11  | 2.73   | 85.59  |
| ANXA13  | 1.593  | 0      |
| ANXA2   | 1.81   | 30.3   |
| ANXA2P1 | 1.343  | 1.01   |
| ANXA2P2 | 1.298  | 19.92  |
| ANXA2P3 | 1.355  | 1.31   |
| ANXA3   | 1.331  | 2.91   |
| ANXA4   | 1.957  | 19.45  |
| ANXA5   | 1.632  | 0.62   |
| ANXA6   | 2.915  | 43.08  |
| ANXA7   | 2.173  | 24.65  |
| ANXA8   | 2.03   | 0      |
| ANXA9   | 1.765  | 0.05   |
| AOAH    | 4.498  | 0.19   |
| AOC2    | 2.87   | 0.12   |
| AOC3    | 4.026  | 0.15   |
| AOF1    | 4.002  | 7.28   |
| AOF2    | 3.191  | 29.78  |
| AOX1    | 4.934  | 0.05   |
| AOX2    | 24.514 | 0.01   |
| AP1B1   | 4.175  | 119.73 |
| AP1G1   | 6.85   | 5.97   |
| AP1G2   | 3.814  | 22.5   |
| AP1GBP1 | 5.098  | 4.58   |
| AP1M1   | 2.284  | 37.88  |
| AP1M2   | 1.751  | 0      |
| AP1S1   | 2.466  | 12.6   |
| AP1S2   | 2.283  | 3.77   |
| AP1S3   | 4.002  | 0.08   |
| AP2A1   | 3.499  | 27.13  |
| AP2A2   | 4.616  | 12.01  |
| AP2B1   | 5.763  | 32.74  |
| AP2M1   | 1.94   | 202.47 |
| AP2S1   | 0.89   | 112.54 |
| AP3B1   | 3.986  | 9.53   |
| AP3B2   | 3.704  | 0      |
| AP3D1   | 4.868  | 29.52  |
| AP3M1   | 3.713  | 10.1   |
| AP3M2   | 3.471  | 3.28   |
| AP3S1   | 2.045  | 9.64   |

|          |        |        |
|----------|--------|--------|
| AP3S2    | 2.562  | 6.54   |
| AP4B1    | 2.434  | 5.54   |
| AP4E1    | 6.682  | 2.31   |
| AP4M1    | 3.634  | 2.62   |
| AP4S1    | 1.572  | 0.75   |
| APAF1    | 10.362 | 4.69   |
| APBA1    | 3.778  | 0.67   |
| APBA2    | 3.623  | 0.14   |
| APBA2BP  | 2.168  | 4      |
| APBA3    | 2.158  | 9.65   |
| APBB1    | 2.711  | 2.57   |
| APBB1IP  | 2.637  | 87.18  |
| APBB2    | 4.564  | 0.02   |
| APBB3    | 2.273  | 6.12   |
| APC      | 10.702 | 1.61   |
| APC2     | 10.151 | 0.17   |
| APCDD1   | 2.558  | 13.96  |
| APCDD1L  | 3.112  | 0      |
| APCS     | 0.931  | 0      |
| APEH     | 2.758  | 22.76  |
| APEX1    | 1.954  | 156.88 |
| APEX2    | 1.977  | 19.09  |
| APH1A    | 1.963  | 90.5   |
| APH1B    | 0.939  | 0.27   |
| API5     | 3.734  | 18.61  |
| APIP     | 1.225  | 11.89  |
| APITD1   | 2.796  | 1.72   |
| APLN     | 3.116  | 0.05   |
| APLP1    | 2.474  | 0.14   |
| APLP2    | 3.721  | 37.98  |
| APOA1    | 0.897  | 1.31   |
| APOA1BP  | 1.121  | 37.79  |
| APOA2    | 0.473  | 0      |
| APOA4    | 1.46   | 0      |
| APOA5    | 1.867  | 0      |
| APOB     | 14.121 | 0      |
| APOB48R  | 3.722  | 1.92   |
| APOBEC1  | 0.892  | 0      |
| APOBEC2  | 1.186  | 0      |
| APOBEC3A | 1.348  | 0      |
| APOBEC3B | 1.536  | 2.19   |
| APOBEC3C | 1.127  | 34.53  |
| APOBEC3D | 1.114  | 2.95   |
| APOBEC3E | 4.687  | 0.43   |
| APOBEC3F | 2.971  | 6.97   |
| APOBEC3G | 1.708  | 23.47  |
| APOBEC3H | 0.916  | 7.82   |
| APOBEC4  | 2.648  | 0      |
| APOC1    | 0.461  | 1.28   |
| APOC2    | 0.721  | 0      |

|         |        |        |
|---------|--------|--------|
| APOC3   | 0.533  | 0      |
| APOC4   | 0.613  | 0      |
| APOD    | 1.04   | 1.05   |
| APOE    | 1.18   | 11.63  |
| APOF    | 1.689  | 0.05   |
| APOH    | 1.171  | 0      |
| APOL1   | 3.073  | 5.79   |
| APOL2   | 2.889  | 13.06  |
| APOL3   | 5.534  | 7.37   |
| APOL4   | 3.478  | 24     |
| APOL5   | 1.438  | 0      |
| APOL6   | 10.139 | 3.34   |
| APOLD1  | 4.569  | 1.44   |
| APOM    | 2.283  | 0.07   |
| APOO    | 1.104  | 6.34   |
| APOOL   | 0.911  | 4.81   |
| APP     | 3.627  | 59.22  |
| APPBP1  | 2.113  | 14.43  |
| APPBP2  | 6.468  | 3.03   |
| APPL1   | 5.969  | 4.74   |
| APPL2   | 3.23   | 8.19   |
| APR-2   | 0.794  | 1.16   |
| APRIN   | 7.437  | 4.5    |
| APRT    | 1.045  | 149.85 |
| APTX    | 4.391  | 2.74   |
| APXLP   | 2.163  | 0      |
| AQP1    | 6.25   | 3.13   |
| AQP10   | 1.791  | 0      |
| AQP11   | 1.446  | 0.29   |
| AQP12A  | 1.084  | 0      |
| AQP2    | 4.174  | 0      |
| AQP3    | 1.824  | 2.54   |
| AQP4    | 5.633  | 0      |
| AQP5    | 1.32   | 0      |
| AQP6    | 2.654  | 0      |
| AQP7    | 1.256  | 0      |
| AQP7P1  | 22.458 | 0      |
| AQP7P2  | 19.277 | 0      |
| AQP7P3  | 17.513 | 0      |
| AQP8    | 1.308  | 0.13   |
| AQP9    | 2.949  | 0      |
| AQR     | 5.08   | 6.22   |
| AR      | 4.496  | 0      |
| ARAF    | 2.467  | 25.2   |
| ARAFPS2 | 2.036  | 0.21   |
| ARC     | 2.943  | 0.11   |
| ARCN1   | 3.904  | 27.66  |
| ARD1A   | 0.882  | 61.79  |
| AREG    | 1.238  | 0      |
| ARF1    | 2.507  | 122.4  |

|           |        |        |
|-----------|--------|--------|
| ARF1P1    | 4.87   | 0.71   |
| ARF3      | 3.595  | 97.12  |
| ARF4      | 1.603  | 16.92  |
| ARF4P     | 0.543  | 5.28   |
| ARF4P2    | 0.827  | 0      |
| ARF4P3    | 4.223  | 0.04   |
| ARF5      | 1.956  | 55.25  |
| ARF6      | 2.103  | 53.31  |
| ARFGAP1   | 3.533  | 31.66  |
| ARFGAP3   | 2.725  | 12.15  |
| ARFGEF1   | 7.212  | 4.55   |
| ARFGEF2   | 6.327  | 3.18   |
| ARFIP1    | 3.223  | 1.17   |
| ARFIP2    | 2.596  | 15.81  |
| ARFRP1    | 1.74   | 20.62  |
| ARG1      | 1.447  | 0.82   |
| ARG2      | 1.981  | 3.4    |
| ARGFX     | 5.065  | 0      |
| ARGFXP1   | 4.865  | 0.03   |
| ARGFXP2   | 1.215  | 0.07   |
| ARHGAP1   | 3.346  | 27.54  |
| ARHGAP10  | 3.056  | 5.98   |
| ARHGAP11A | 6.021  | 4.15   |
| ARHGAP12  | 4.172  | 2.44   |
| ARHGAP15  | 1.695  | 18.29  |
| ARHGAP16P | 0.781  | 0.21   |
| ARHGAP17  | 3.48   | 35.54  |
| ARHGAP18  | 3.499  | 4.82   |
| ARHGAP19  | 5.463  | 7.19   |
| ARHGAP20  | 6.189  | 0      |
| ARHGAP21  | 7.109  | 6.03   |
| ARHGAP22  | 2.749  | 4.75   |
| ARHGAP23  | 6.696  | 20.39  |
| ARHGAP24  | 5.651  | 5.56   |
| ARHGAP25  | 3.561  | 14.17  |
| ARHGAP26  | 9.041  | 1.74   |
| ARHGAP27  | 3.628  | 28.23  |
| ARHGAP28  | 5.768  | 0      |
| ARHGAP29  | 5.573  | 0.29   |
| ARHGAP30  | 5.412  | 37.51  |
| ARHGAP4   | 3.235  | 130.37 |
| ARHGAP5   | 9.749  | 1.7    |
| ARHGAP6   | 10.149 | 0      |
| ARHGAP8   | 1.725  | 0      |
| ARHGAP9   | 2.912  | 28.9   |
| ARHGDIA   | 1.862  | 196.48 |
| ARHGDIB   | 1.216  | 837.72 |
| ARHGDIG   | 0.942  | 0.09   |
| ARHGEF1   | 4.602  | 50.71  |
| ARHGEF10  | 5.912  | 1.33   |



|           |        |       |
|-----------|--------|-------|
| ARHGEF10L | 4.494  | 0.06  |
| ARHGEF11  | 6.889  | 7.77  |
| ARHGEF12  | 9.501  | 0.28  |
| ARHGEF15  | 4.165  | 0.42  |
| ARHGEF16  | 2.183  | 0.5   |
| ARHGEF17  | 7.518  | 11.02 |
| ARHGEF18  | 5.345  | 8.26  |
| ARHGEF19  | 3.029  | 1.44  |
| ARHGEF2   | 4.287  | 39.35 |
| ARHGEF3   | 3.56   | 11.69 |
| ARHGEF4   | 5.561  | 0     |
| ARHGEF5   | 10.976 | 0.27  |
| ARHGEF6   | 5.272  | 13.79 |
| ARHGEF7   | 8.656  | 19.49 |
| ARHGEF9   | 5.412  | 6.36  |
| ARID1A    | 8.817  | 23.74 |
| ARID1B    | 8.264  | 11.08 |
| ARID2     | 8.466  | 2.64  |
| ARID3A    | 2.724  | 3.55  |
| ARID3B    | 4.205  | 6.97  |
| ARID3C    | 1.239  | 0     |
| ARID4A    | 4.87   | 3.25  |
| ARID4B    | 6.033  | 4.02  |
| ARID5A    | 4.096  | 76.54 |
| ARID5B    | 7.507  | 7.61  |
| ARIH1     | 3.506  | 12.44 |
| ARIH2     | 4.236  | 43.65 |
| ARL1      | 3.199  | 11    |
| ARL10     | 2.402  | 0.21  |
| ARL11     | 3.76   | 6.32  |
| ARL13A    | 1.002  | 0     |
| ARL13B    | 5.449  | 0.9   |
| ARL14     | 1.29   | 0     |
| ARL15     | 2.789  | 2.51  |
| ARL16     | 1.207  | 11.09 |
| ARL17P1   | 0.798  | 0.84  |
| ARL2      | 0.895  | 33.6  |
| ARL2BP    | 2.1    | 16.6  |
| ARL3      | 3.87   | 3.03  |
| ARL4A     | 6.872  | 0.13  |
| ARL4C     | 4.009  | 0.8   |
| ARL4D     | 1.585  | 4.89  |
| ARL4P2    | 1.147  | 0     |
| ARL5A     | 3.594  | 3.32  |
| ARL5B     | 3.589  | 0.24  |
| ARL6      | 1.453  | 0.12  |
| ARL6IP1   | 2.264  | 55.88 |
| ARL6IP2   | 2.467  | 5.97  |
| ARL6IP4   | 2.243  | 53.62 |
| ARL6IP5   | 2.128  | 32.14 |

|         |       |        |
|---------|-------|--------|
| ARL6IP6 | 1.762 | 6.02   |
| ARL8A   | 2.345 | 15.27  |
| ARL8B   | 2.985 | 12.33  |
| ARL9    | 0.836 | 4.03   |
| ARMC1   | 2.649 | 4      |
| ARMC10  | 5.258 | 3.17   |
| ARMC2   | 3.239 | 0.59   |
| ARMC3   | 2.802 | 0      |
| ARMC4   | 3.572 | 0      |
| ARMC5   | 4.926 | 6.99   |
| ARMC6   | 2.289 | 25.76  |
| ARMC7   | 2.126 | 5.7    |
| ARMC8   | 5.759 | 3.32   |
| ARMC9   | 2.178 | 0.47   |
| ARMCX1  | 2.141 | 5.58   |
| ARMCX2  | 3.079 | 2.22   |
| ARMCX3  | 3.545 | 5.97   |
| ARMCX4  | 3.833 | 1.01   |
| ARMCX5  | 2.944 | 4.55   |
| ARMCX6  | 1.848 | 13.22  |
| ARMET   | 0.875 | 77.98  |
| ARMETL1 | 1.33  | 0.31   |
| ARMS2   | 0.808 | 0      |
| ARNT    | 7.267 | 7.25   |
| ARNT2   | 6.559 | 0.81   |
| ARNTL   | 3.015 | 0.67   |
| ARNTL2  | 1.93  | 0.57   |
| ARP11   | 2.436 | 0.17   |
| ARPC1A  | 3.186 | 12.74  |
| ARPC1B  | 3.04  | 45.74  |
| ARPC2   | 1.522 | 120.1  |
| ARPC3   | 0.884 | 134.36 |
| ARPC3B  | 0.8   | 7.68   |
| ARPC4   | 2.253 | 99.42  |
| ARPC5   | 1.982 | 51.55  |
| ARPC5L  | 1.328 | 94.51  |
| ARPM1   | 2.001 | 0.71   |
| ARPP-19 | 5.162 | 10.15  |
| ARPP-21 | 5.489 | 0      |
| ARR3    | 1.292 | 0.26   |
| ARRB1   | 5.465 | 22.6   |
| ARRB2   | 1.919 | 87.35  |
| ARRDC1  | 1.598 | 10.28  |
| ARRDC2  | 2.942 | 28.4   |
| ARRDC3  | 4.133 | 27.94  |
| ARRDC4  | 4.049 | 2.46   |
| ARRDC5  | 1.638 | 2.88   |
| ARS2    | 6.954 | 21.84  |
| ARSA    | 2.023 | 11.33  |
| ARSB    | 6.829 | 1.63   |

|         |        |       |
|---------|--------|-------|
| ARSD    | 6.319  | 7.78  |
| ARSDP   | 24.443 | 0.01  |
| ARSE    | 1.858  | 0.04  |
| ARSEP   | 15.262 | 0.01  |
| ARSF    | 2.012  | 0     |
| ARSG    | 2.013  | 0.21  |
| ARSH    | 1.689  | 0     |
| ARSI    | 1.71   | 0     |
| ARSJ    | 4.536  | 0     |
| ARSK    | 2.381  | 0.74  |
| ART1    | 1.312  | 0     |
| ART2P   | 0.69   | 0     |
| ART3    | 1.525  | 0     |
| ART4    | 1.371  | 0     |
| ART5    | 1.451  | 0     |
| ARTN    | 2.631  | 7.08  |
| ARTS-1  | 5.598  | 9.48  |
| ARV1    | 1.445  | 9.03  |
| ARVCF   | 4.019  | 1.53  |
| ARX     | 2.184  | 0     |
| AS3MT   | 1.729  | 1.21  |
| ASAH1   | 2.636  | 7.54  |
| ASAH2   | 2.289  | 0.15  |
| ASAH3   | 0.795  | 2.12  |
| ASAH3L  | 2.852  | 0.47  |
| ASAHL   | 1.238  | 7.55  |
| ASAM    | 2.643  | 0     |
| ASB1    | 6.833  | 1.96  |
| ASB10   | 3.64   | 0     |
| ASB11   | 1.151  | 0     |
| ASB12   | 1.069  | 0.16  |
| ASB13   | 2.699  | 18.7  |
| ASB14   | 2.199  | 0.5   |
| ASB15   | 5.412  | 0     |
| ASB16   | 2.139  | 1.26  |
| ASB17   | 1.105  | 0     |
| ASB18   | 2.293  | 0     |
| ASB2    | 2.742  | 0.46  |
| ASB3    | 2.373  | 3.26  |
| ASB4    | 4.54   | 0     |
| ASB5    | 2.929  | 0     |
| ASB6    | 8.958  | 4.49  |
| ASB7    | 3.568  | 2.5   |
| ASB8    | 2.613  | 6.77  |
| ASB9    | 2.735  | 2.31  |
| ASCC1   | 2.076  | 20.45 |
| ASCC2   | 2.781  | 24.86 |
| ASCC3   | 10.492 | 3.14  |
| ASCC3L1 | 7.173  | 40.16 |
| ASCIZ   | 4.866  | 6.4   |

|         |        |       |
|---------|--------|-------|
| ASCL1   | 2.469  | 0     |
| ASCL2   | 1.849  | 1.78  |
| ASCL3   | 0.65   | 0     |
| ASCL4   | 2.254  | 0     |
| ASCL5   | 0.837  | 0     |
| ASF1A   | 2.059  | 3.68  |
| ASF1B   | 1.731  | 20.15 |
| ASGR1   | 1.283  | 3.68  |
| ASGR2   | 1.747  | 0.34  |
| ASH1L   | 9.926  | 2.55  |
| ASH2L   | 2.36   | 25.48 |
| ASH2LP1 | 1.411  | 0.06  |
| ASIP    | 0.584  | 1.01  |
| ASL     | 4.344  | 2.89  |
| ASLL    | 4.186  | 0.54  |
| ASMT    | 1.37   | 1.11  |
| ASMTL   | 1.891  | 20    |
| ASNA1   | 1.28   | 61.07 |
| ASNS    | 5.904  | 0.4   |
| ASNSD1  | 2.448  | 5.85  |
| ASPA    | 1.418  | 0.06  |
| ASPH    | 7.176  | 0.01  |
| ASPHD1  | 1.478  | 0.17  |
| ASPHD2  | 1.884  | 3.26  |
| ASPM    | 10.434 | 1.83  |
| ASPN    | 2.47   | 0     |
| ASPSCR1 | 1.843  | 9.87  |
| ASRGL1  | 1.321  | 0.07  |
| ASS1    | 1.67   | 1.92  |
| ASSP10  | 1.545  | 0     |
| ASSP12  | 1.227  | 0.27  |
| ASSP2   | 1.51   | 0     |
| ASSP4   | 1.52   | 0     |
| ASSP5   | 1.498  | 0     |
| ASSP6   | 1.529  | 0     |
| ASSP8   | 0.876  | 0     |
| ASSP9   | 1.542  | 0.11  |
| ASTE1   | 2.662  | 1.55  |
| ASTL    | 1.296  | 0.07  |
| ASTN1   | 7.524  | 0.25  |
| ASTN2   | 5.917  | 0.2   |
| ASXL1   | 7.033  | 14.09 |
| ASXL2   | 7.452  | 3.82  |
| ASXL3   | 7.537  | 0     |
| ASZ1    | 3.662  | 0     |
| ATAD1   | 3.034  | 4.69  |
| ATAD2   | 4.896  | 4.13  |
| ATAD2B  | 8.103  | 1.37  |
| ATAD3A  | 2.611  | 8.52  |
| ATAD3B  | 2.433  | 5.68  |

|         |        |       |
|---------|--------|-------|
| ATAD3C  | 1.817  | 0.05  |
| ATAD4   | 1.385  | 0     |
| ATAD5   | 6.245  | 0.66  |
| ATBF1   | 12.229 | 4.03  |
| ATCAY   | 3.41   | 0     |
| ATE1    | 2.338  | 3.42  |
| ATF1    | 1.551  | 10.7  |
| ATF2    | 2.363  | 7.52  |
| ATF3    | 3.801  | 2.63  |
| ATF4    | 2.505  | 92.85 |
| ATF5    | 2.008  | 13.26 |
| ATF6    | 2.849  | 9.7   |
| ATF7    | 3.748  | 7.64  |
| ATF7IP  | 4.843  | 9.64  |
| ATF7IP2 | 4.089  | 9.09  |
| ATG10   | 1.817  | 1.76  |
| ATG12   | 2.359  | 5.29  |
| ATG16L1 | 3.474  | 4.21  |
| ATG16L2 | 2.393  | 17.42 |
| ATG3    | 1.242  | 26.66 |
| ATG4A   | 2.889  | 4.28  |
| ATG4B   | 4.659  | 12.15 |
| ATG4C   | 1.901  | 4.12  |
| ATG4D   | 1.896  | 9.07  |
| ATG5    | 3.244  | 4.67  |
| ATG7    | 2.362  | 4.38  |
| ATG9A   | 3.69   | 18.65 |
| ATG9B   | 9.599  | 0.49  |
| ATHL1   | 3.059  | 18.4  |
| ATIC    | 1.91   | 25.8  |
| ATM     | 13.471 | 6.47  |
| ATN1    | 4.419  | 66.93 |
| ATOH1   | 1.065  | 0     |
| ATOH7   | 1.475  | 0     |
| ATOH8   | 2.435  | 0.24  |
| ATOX1   | 0.489  | 50.82 |
| ATP10A  | 6.767  | 32.42 |
| ATP10B  | 6.896  | 0     |
| ATP10D  | 6.55   | 3.93  |
| ATP11A  | 14.122 | 5.46  |
| ATP11B  | 7.322  | 4.59  |
| ATP11C  | 8.735  | 0.93  |
| ATP12A  | 3.565  | 0     |
| ATP13A1 | 3.805  | 29.53 |
| ATP13A2 | 3.84   | 50.15 |
| ATP13A3 | 3.973  | 1.84  |
| ATP13A4 | 4.274  | 0.04  |
| ATP13A5 | 3.657  | 0     |
| ATP1A1  | 4.27   | 39.26 |
| ATP1A2  | 5.436  | 0.04  |

|          |        |        |
|----------|--------|--------|
| ATP1A3   | 3.551  | 0.28   |
| ATP1A4   | 4.364  | 0      |
| ATP1B1   | 2.987  | 0.11   |
| ATP1B2   | 3.332  | 0.36   |
| ATP1B3   | 1.853  | 28.87  |
| ATP1B3P1 | 2.014  | 1.76   |
| ATP1B4   | 3.856  | 0      |
| ATP1BL1  | 2.051  | 0.04   |
| ATP2A1   | 3.866  | 0.57   |
| ATP2A2   | 6.368  | 17.88  |
| ATP2A3   | 9.06   | 20.66  |
| ATP2B1   | 10.18  | 0.99   |
| ATP2B2   | 6.805  | 0.14   |
| ATP2B3   | 9.526  | 0.03   |
| ATP2B4   | 13.443 | 13.85  |
| ATP2C1   | 6.082  | 7.61   |
| ATP2C2   | 3.6    | 0.05   |
| ATP4A    | 3.559  | 0      |
| ATP4B    | 1.488  | 0      |
| ATP5A1   | 2.035  | 171.58 |
| ATP5B    | 1.843  | 315.05 |
| ATP5C1   | 1.291  | 67.59  |
| ATP5C2   | 0.1    | 0      |
| ATP5D    | 1.088  | 90.74  |
| ATP5E    | 0.533  | 346.43 |
| ATP5EP1  | 0.419  | 0      |
| ATP5F1   | 2.116  | 52.07  |
| ATP5G1   | 0.702  | 50.4   |
| ATP5G2   | 1.437  | 278.97 |
| ATP5G3   | 2.863  | 32.45  |
| ATP5GP1  | 0.628  | 28.44  |
| ATP5GP2  | 0.563  | 5.54   |
| ATP5GP3  | 0.547  | 0.31   |
| ATP5GP4  | 0.525  | 11.23  |
| ATP5H    | 0.622  | 89.65  |
| ATP5I    | 0.36   | 211.29 |
| ATP5J    | 3.357  | 19.2   |
| ATP5J2   | 1.016  | 89.54  |
| ATP5J2P2 | 0.428  | 100.77 |
| ATP5L    | 1.338  | 144.29 |
| ATP5L2   | 0.799  | 1.58   |
| ATP5LP1  | 0.453  | 0      |
| ATP5LP2  | 0.411  | 37.91  |
| ATP5LP3  | 0.71   | 9.73   |
| ATP5O    | 0.806  | 96.57  |
| ATP5S    | 2.424  | 1.35   |
| ATP6     | 0.681  | 0      |
| ATP6AP1  | 2.099  | 57.47  |
| ATP6AP2  | 2.037  | 21.17  |
| ATP6V0A1 | 4.122  | 0.22   |

|           |        |        |
|-----------|--------|--------|
| ATP6V0A2  | 4.681  | 2.01   |
| ATP6V0A4  | 6.714  | 0      |
| ATP6V0B   | 1.284  | 77.47  |
| ATP6V0C   | 1.093  | 157.76 |
| ATP6V0D1  | 1.67   | 58.41  |
| ATP6V0D2  | 2.37   | 0      |
| ATP6V0E1  | 0.882  | 101.05 |
| ATP6V0E2  | 5.452  | 0.31   |
| ATP6V1A   | 4.549  | 5.34   |
| ATP6V1B1  | 1.939  | 0      |
| ATP6V1B2  | 3.044  | 20.79  |
| ATP6V1C1  | 5.761  | 2.86   |
| ATP6V1C2  | 3.24   | 6.42   |
| ATP6V1D   | 1.669  | 13.68  |
| ATP6V1E1  | 1.406  | 43.74  |
| ATP6V1E2  | 1.979  | 1.36   |
| ATP6V1F   | 1.382  | 60.34  |
| ATP6V1G1  | 1.611  | 45.96  |
| ATP6V1G2  | 5.742  | 0      |
| ATP6V1G3  | 1.122  | 0      |
| ATP6V1GP2 | 1.006  | 0.25   |
| ATP6V1H   | 2.27   | 9.69   |
| ATP7A     | 8.03   | 0.93   |
| ATP7B     | 6.642  | 0.23   |
| ATP8      | 0.207  | 0      |
| ATP8A1    | 3.793  | 1.35   |
| ATP8A2    | 3.904  | 0.35   |
| ATP8B1    | 3.891  | 0.28   |
| ATP8B2    | 6.568  | 19.11  |
| ATP8B3    | 5.09   | 0.08   |
| ATP8B4    | 5.677  | 4.41   |
| ATP9A     | 7.58   | 2.54   |
| ATP9B     | 4.358  | 3.93   |
| ATPAF1    | 1.758  | 16.67  |
| ATPAF2    | 1.552  | 11.67  |
| ATPBD1B   | 1.756  | 9.59   |
| ATPBD1C   | 1.459  | 6.3    |
| ATPBD3    | 1.151  | 6.51   |
| ATPBD4    | 2.094  | 0.93   |
| ATPIF1    | 2.607  | 23.33  |
| ATQL3     | 1.048  | 0      |
| ATQL4     | 0.45   | 0      |
| ATR       | 8.232  | 2.4    |
| ATRN      | 8.87   | 3.1    |
| ATRNL1    | 6.13   | 4.21   |
| ATRX      | 10.758 | 4.7    |
| ATXN1     | 10.636 | 0.03   |
| ATXN10    | 2.963  | 24.47  |
| ATXN2     | 4.702  | 6.65   |
| ATXN2L    | 7.234  | 38     |

|          |        |         |
|----------|--------|---------|
| ATXN3    | 4.374  | 1.39    |
| ATXN3L   | 1.288  | 0.07    |
| ATXN7    | 4.416  | 2.19    |
| ATXN7L2  | 2.318  | 4.18    |
| ATXN7L4  | 2.94   | 0.25    |
| ATXN8OS  | 1.148  | 0       |
| AUH      | 1.549  | 2.99    |
| AUP1     | 1.603  | 62.8    |
| AURKA    | 2.817  | 4.09    |
| AURKAIP1 | 0.752  | 93.87   |
| AURKB    | 1.236  | 26.45   |
| AURKC    | 1.513  | 0.06    |
| AUTS2    | 11.945 | 8.62    |
| AVEN     | 1.531  | 6.27    |
| AVIL     | 2.711  | 0.59    |
| AVP      | 0.619  | 3.54    |
| AVPI1    | 1.347  | 0.5     |
| AVPR1A   | 4.154  | 0       |
| AVPR1B   | 2.269  | 0       |
| AVPR2    | 1.804  | 0.7     |
| AXIIR    | 1.439  | 7.03    |
| AXIN1    | 3.448  | 13.93   |
| AXIN2    | 4.259  | 0.42    |
| AXL      | 5.022  | 0.25    |
| AXUD1    | 3.183  | 59.92   |
| AYP1p1   | 1.173  | 0.43    |
| AYTL1    | 1.919  | 2.15    |
| AYTL2    | 3.946  | 10.91   |
| AZGP1    | 2.434  | 0.76    |
| AZI1     | 3.619  | 8.66    |
| AZI2     | 3.115  | 4       |
| AZIN1    | 4.348  | 14.28   |
| AZU1     | 0.912  | 8.31    |
| B2M      | 0.987  | 1872.31 |
| B3GALNT1 | 3.641  | 0.21    |
| B3GALNT2 | 2.009  | 2.77    |
| B3GALT1  | 2.168  | 0       |
| B3GALT2  | 3.213  | 0       |
| B3GALT4  | 5.058  | 0       |
| B3GALT5  | 3.818  | 0       |
| B3GALT6  | 2.774  | 15.64   |
| B3GALTL  | 3.439  | 0.86    |
| B3GAT1   | 3.805  | 0.03    |
| B3GAT2   | 0.972  | 0.26    |
| B3GAT3   | 1.442  | 27.75   |
| B3GNT1   | 2.07   | 8.51    |
| B3GNT2   | 2.749  | 31.29   |
| B3GNT3   | 2.72   | 0       |
| B3GNT4   | 1.504  | 0       |
| B3GNT5   | 4.123  | 0.02    |



|             |        |       |
|-------------|--------|-------|
| B3GNT6      | 2.471  | 0     |
| B3GNT7      | 1.434  | 0.06  |
| B3GNT8      | 1.874  | 1.22  |
| B3GNTL1     | 1.383  | 7.13  |
| B4GALNT1    | 3.01   | 0.06  |
| B4GALNT2    | 1.792  | 0     |
| B4GALNT3    | 3.761  | 1.79  |
| B4GALNT4    | 3.12   | 0.03  |
| B4GALT1     | 4.076  | 53.75 |
| B4GALT2     | 2.313  | 13.66 |
| B4GALT3     | 1.949  | 18.71 |
| B4GALT4     | 2.344  | 1.84  |
| B4GALT5     | 4.645  | 8.78  |
| B4GALT6     | 4.043  | 2.71  |
| B4GALT7     | 1.659  | 8.02  |
| bA16L21.2.1 | 2.472  | 1.43  |
| bA291L22.4  | 2.359  | 0     |
| bA327L3.4   | 1.501  | 61    |
| bA345E19.2  | 0.626  | 0.54  |
| BA393J16.4  | 2.344  | 0     |
| bA395L14.12 | 1.012  | 2.41  |
| BA775A3.1   | 0.479  | 0     |
| bA9F11.1    | 0.507  | 0     |
| BAALC       | 5.166  | 6.6   |
| BAAT        | 3.108  | 0     |
| BACE1       | 5.983  | 7.33  |
| BACE2       | 4.22   | 0.26  |
| BACH1       | 6.731  | 3.45  |
| BACH2       | 9.113  | 2.99  |
| BAD         | 1.197  | 20.9  |
| BAG1        | 3.858  | 5.96  |
| BAG2        | 1.545  | 0.49  |
| BAG3        | 2.571  | 0.85  |
| BAG4        | 2.182  | 1.43  |
| BAG5        | 6.783  | 6.86  |
| BAGE        | 0.967  | 0     |
| BAGE4       | 1.755  | 0.05  |
| BAHCC1      | 10.708 | 0.48  |
| BAHD1       | 4.517  | 12.59 |
| BAI1        | 5.528  | 0.03  |
| BAI2        | 5.399  | 0.06  |
| BAI3        | 5.218  | 0     |
| BAIAP2      | 4.925  | 2.57  |
| BAIAP2L1    | 4.06   | 0.02  |
| BAIAP2L2    | 2.068  | 1.43  |
| BAIAP3      | 4.523  | 0.54  |
| BAK1        | 2.098  | 20.11 |
| BAMBI       | 1.724  | 0     |
| BANF1       | 1.152  | 72.83 |
| BANK1       | 3.239  | 51.39 |

|           |        |        |
|-----------|--------|--------|
| BANP      | 2.2    | 6.2    |
| BAP1      | 3.585  | 30.62  |
| BAPX1     | 2.165  | 0      |
| BARD1     | 2.53   | 1.03   |
| BARHL1    | 1.907  | 0      |
| BARHL2    | 1.496  | 0      |
| BARX1     | 1.482  | 0      |
| BARX2     | 1.454  | 0      |
| BASP1     | 1.797  | 1.31   |
| BAT1      | 6.405  | 0.1    |
| BAT2      | 20.793 | 0.84   |
| BAT2D1    | 10.383 | 19.96  |
| BAT3      | 13.001 | 0.35   |
| BAT4      | 5.691  | 0.25   |
| BAT5      | 5.88   | 0.09   |
| BATF      | 0.939  | 7.44   |
| BATF2     | 2.14   | 0      |
| BAX       | 1.967  | 50.54  |
| BAZ1A     | 6.016  | 12.22  |
| BAZ1B     | 15.31  | 5.35   |
| BAZ2A     | 8.934  | 16.38  |
| BAZ2B     | 8.145  | 3.37   |
| BBC3      | 1.838  | 26.58  |
| BBOX1     | 1.584  | 0      |
| BBS1      | 3.37   | 5.68   |
| BBS10     | 3.329  | 1.32   |
| BBS12     | 3.244  | 0.42   |
| BBS2      | 2.963  | 6.17   |
| BBS4      | 2.482  | 2.65   |
| BBS5      | 3.157  | 0.58   |
| BBS7      | 4.244  | 0.73   |
| BBS9      | 8.038  | 0.84   |
| BBX       | 3.926  | 5.08   |
| BC37295_3 | 1.68   | 0.1    |
| BCAM      | 3.203  | 4.37   |
| BCAN      | 4.691  | 0      |
| BCAP29    | 17.418 | 1.06   |
| BCAP31    | 1.324  | 105.17 |
| BCAR1     | 3.217  | 0.03   |
| BCAR3     | 3.171  | 4.91   |
| BCAS1     | 2.816  | 0.18   |
| BCAS2     | 1.304  | 13.43  |
| BCAS3     | 3.496  | 6.75   |
| BCAS4     | 2.034  | 4.84   |
| BCAT1     | 8.191  | 7.55   |
| BCAT2     | 1.58   | 17.59  |
| BCCIP     | 3.261  | 20.82  |
| BCDIN3    | 5.958  | 15.93  |
| BCDO2     | 3.185  | 0.03   |
| BCHE      | 2.443  | 0      |

|          |        |       |
|----------|--------|-------|
| BCKDHA   | 1.764  | 28.13 |
| BCKDHB   | 3.996  | 2.15  |
| BCKDK    | 1.83   | 31.07 |
| BCL10    | 2.786  | 1.27  |
| BCL11A   | 10.942 | 9.99  |
| BCL11B   | 7.816  | 0.11  |
| BCL2     | 8.07   | 9.15  |
| BCL2A1   | 0.884  | 2     |
| BCL2L1   | 3.218  | 76.83 |
| BCL2L10  | 0.887  | 0     |
| BCL2L11  | 9.737  | 0.83  |
| BCL2L12  | 1.855  | 17.89 |
| BCL2L13  | 3.367  | 13.86 |
| BCL2L14  | 3.737  | 0.04  |
| BCL2L2   | 3.54   | 6.87  |
| BCL2L7P1 | 0.636  | 5.04  |
| BCL2L7P2 | 0.632  | 0     |
| BCL3     | 1.81   | 13.64 |
| BCL6     | 3.9    | 4.55  |
| BCL6B    | 3.525  | 4.68  |
| BCL7A    | 4.268  | 34.92 |
| BCL7B    | 4.604  | 10.5  |
| BCL7C    | 0.858  | 37.9  |
| BCL9     | 6.278  | 1.42  |
| BCL9L    | 7.536  | 14.07 |
| BCLAF1   | 5.538  | 17.29 |
| BCMO1    | 2.427  | 0     |
| BCOR     | 9.421  | 6.76  |
| BCORL1   | 6.74   | 3.01  |
| BCORL2   | 51.184 | 0.05  |
| BCR      | 6.927  | 22.06 |
| BCRL4    | 6.52   | 0.01  |
| BCS1L    | 1.584  | 16.7  |
| BCYRN1   | 0.2    | 0     |
| BCYRN1P1 | 0.204  | 0     |
| BDH1     | 3.689  | 3.95  |
| BDH2     | 2.92   | 3.23  |
| BDH2P1   | 2.9    | 1.33  |
| BDKRB1   | 1.289  | 0     |
| BDKRB2   | 4.263  | 0     |
| BDNF     | 6.564  | 0     |
| BDNFOS   | 2.322  | 1.52  |
| BDP1     | 14.404 | 0.77  |
| BECN1    | 2.112  | 18.91 |
| BEST1    | 2.673  | 6.27  |
| BEST2    | 1.846  | 0     |
| BEST3    | 4.611  | 0     |
| BEST4    | 2.045  | 0.08  |
| BET1     | 6.122  | 0.88  |
| BET1L    | 3.213  | 19.77 |

|         |        |        |
|---------|--------|--------|
| BEX1    | 0.862  | 0.09   |
| BEX2    | 0.87   | 0.09   |
| BEXL1   | 1.245  | 34.78  |
| BFAR    | 2.53   | 10.32  |
| BFSP1   | 2.167  | 0.12   |
| BFSP2   | 1.626  | 0      |
| BGLAP   | 0.48   | 4.04   |
| BGN     | 2.38   | 3.93   |
| BHLHB2  | 2.919  | 31.22  |
| BHLHB3  | 3.623  | 1.19   |
| BHLHB4  | 0.942  | 0      |
| BHLHB5  | 3.373  | 0      |
| BHLHB8  | 1.781  | 5.53   |
| BHLHB9  | 3.973  | 0.17   |
| BHMT    | 2.416  | 0.03   |
| BHMT2   | 2.007  | 0      |
| BIC     | 12.969 | 0.3    |
| BICC1   | 3.119  | 0      |
| BICD1   | 4.541  | 1.56   |
| BICD2   | 8.726  | 4.83   |
| BID     | 2.812  | 14.47  |
| BIK     | 0.95   | 0.44   |
| BIN1    | 3.161  | 21.58  |
| BIN2    | 2.211  | 1.6    |
| BIN3    | 1.797  | 13.03  |
| BIRC2   | 3.743  | 6.12   |
| BIRC3   | 5.342  | 0.05   |
| BIRC4   | 8.413  | 2.48   |
| BIRC5   | 5.155  | 5.38   |
| BIRC6   | 16.069 | 4.77   |
| BIRC7   | 1.516  | 0      |
| BIRC8   | 2.022  | 0      |
| BIVM    | 3.857  | 3.03   |
| BLCAP   | 2.043  | 43.74  |
| BLK     | 2.59   | 26.83  |
| BLM     | 4.417  | 2.16   |
| BLMH    | 2.417  | 33.21  |
| BLNK    | 1.816  | 68.79  |
| BLOC1S1 | 0.1    | 422.86 |
| BLOC1S2 | 0.1    | 117.93 |
| BLOC1S3 | 0.232  | 12.7   |
| BLR1    | 4.074  | 0.06   |
| BLVRA   | 2.162  | 5.49   |
| BLVRB   | 0.797  | 29.39  |
| BLZF1   | 2.318  | 2      |
| BLZF2P  | 3.453  | 0.12   |
| BMF     | 8.865  | 5.35   |
| BMI1    | 3.203  | 10.81  |
| BMP1    | 4.654  | 3.78   |
| BMP10   | 1.584  | 0      |

|        |        |       |
|--------|--------|-------|
| BMP15  | 1.179  | 0     |
| BMP2   | 3.15   | 3.71  |
| BMP2K  | 4.513  | 8.92  |
| BMP2KL | 1.236  | 0.14  |
| BMP3   | 1.774  | 0.09  |
| BMP4   | 2.383  | 12.34 |
| BMP5   | 2.172  | 0     |
| BMP6   | 2.872  | 0     |
| BMP6P1 | 1.647  | 0     |
| BMP7   | 1.879  | 0     |
| BMP8A  | 5.626  | 0.06  |
| BMP8B  | 3.773  | 0.09  |
| BMPER  | 10.064 | 0.02  |
| BMPR1A | 3.616  | 0     |
| BMPR1B | 2.035  | 0.04  |
| BMPR2  | 11.449 | 2.01  |
| BMS1L  | 4.208  | 7.49  |
| BMX    | 2.623  | 0.03  |
| BNC1   | 4.612  | 0     |
| BNC2   | 12.926 | 0     |
| BNIP1  | 1.783  | 3.12  |
| BNIP2  | 2.359  | 17.61 |
| BNIP3  | 1.534  | 3.57  |
| BNIP3L | 3.5    | 10.95 |
| BNIP3P | 1.533  | 1.42  |
| BNIPL  | 2.489  | 0.1   |
| BOAT   | 1.198  | 1.55  |
| BOC    | 4.281  | 2.87  |
| BOK    | 2.601  | 0.03  |
| BOLA1  | 0.808  | 10.11 |
| BOLA2  | 1.778  | 10.85 |
| BOLA2B | 1.012  | 19.06 |
| BOLA3  | 0.812  | 16.39 |
| BOLL   | 3.206  | 0     |
| BOP1   | 2.373  | 33.3  |
| BP75   | 0.453  | 0     |
| BPGM   | 5.956  | 1.54  |
| BPHL   | 1.517  | 1.55  |
| BPI    | 1.812  | 5.02  |
| BPIL1  | 1.897  | 0     |
| BPIL2  | 1.524  | 0     |
| BPIL3  | 1.362  | 0     |
| BPNT1  | 2.452  | 9.27  |
| BPTF   | 11.778 | 6.17  |
| BPY2   | 1.206  | 0     |
| BPY2B  | 1.206  | 0     |
| BPY2C  | 1.206  | 0     |
| BRAF   | 4.954  | 0.73  |
| BRAF2  | 0.774  | 0     |
| BRAP   | 2.033  | 8.08  |

|         |        |        |
|---------|--------|--------|
| BRCA1   | 11.393 | 2.19   |
| BRCA1P1 | 1.686  | 0.9    |
| BRCA2   | 11.386 | 0.16   |
| BRCC2   | 0.862  | 0      |
| BRCC3   | 2.914  | 3.21   |
| BRD1    | 4.608  | 10.82  |
| BRD2    | 14.079 | 0.42   |
| BRD3    | 3.259  | 11.19  |
| BRD4    | 6.652  | 25.19  |
| BRD7    | 2.204  | 19.61  |
| BRD7P   | 2.082  | 0.2    |
| BRD8    | 4.913  | 12.81  |
| BRD9    | 3.093  | 12.64  |
| BRDG1   | 1.506  | 22.94  |
| BRDT    | 3.213  | 0      |
| BRE     | 2.709  | 10.63  |
| BRF1    | 6.439  | 12.17  |
| BRF2    | 1.978  | 6.56   |
| BRI3    | 1.566  | 22.65  |
| BRI3BP  | 2.501  | 12.56  |
| BRIP1   | 4.563  | 0.59   |
| BRMS1   | 2.147  | 20.95  |
| BRMS1L  | 2.584  | 0.85   |
| BRP44   | 0.789  | 32.67  |
| BRP44L  | 0.962  | 8.06   |
| BRPF1   | 4.857  | 10.77  |
| BRPF3   | 6.019  | 8.05   |
| BRS3    | 1.413  | 0      |
| BRSK1   | 3.108  | 0.38   |
| BRSK2   | 3.506  | 0.03   |
| BRUNOL4 | 3.175  | 0      |
| BRUNOL5 | 1.854  | 0      |
| BRUNOL6 | 3.399  | 1.68   |
| BRWD1   | 17.988 | 1.25   |
| BRWD2   | 4.724  | 7.84   |
| BRWD3   | 6.085  | 0.71   |
| BSCL2   | 1.633  | 28.21  |
| BSDC1   | 4.599  | 12.22  |
| BSG     | 2.598  | 101.12 |
| BSN     | 15.955 | 0.05   |
| BSND    | 1.37   | 0      |
| BSPRY   | 2.065  | 1.79   |
| BST1    | 1.411  | 2.39   |
| BST2    | 0.939  | 143.35 |
| BTAF1   | 7.04   | 4.16   |
| BTBD1   | 5.246  | 6.06   |
| BTBD10  | 2.508  | 4.67   |
| BTBD11  | 8.041  | 0.04   |
| BTBD12  | 7.293  | 1.12   |
| BTBD14A | 2.08   | 0.12   |

|           |       |        |
|-----------|-------|--------|
| BTBD14B   | 4.491 | 21.83  |
| BTBD16    | 1.848 | 0      |
| BTBD2     | 2.618 | 56.18  |
| BTBD3     | 5.251 | 4.7    |
| BTBD6     | 1.956 | 18.6   |
| BTBD7     | 9.528 | 1.78   |
| BTBD8     | 1.412 | 0.12   |
| BTBD9     | 1.98  | 0.72   |
| BTC       | 1.27  | 0      |
| BTD       | 2.065 | 2.49   |
| BTF3      | 1.383 | 274.88 |
| BTF3L1    | 0.636 | 0      |
| BTF3L4    | 2.203 | 9.21   |
| BTF3P1    | 0.52  | 0      |
| BTF3P2    | 0.751 | 1.12   |
| BTG1      | 1.782 | 47.65  |
| BTG2      | 2.712 | 57.74  |
| BTG3      | 1.353 | 0.81   |
| BTG4      | 0.999 | 0      |
| BTK       | 2.574 | 43.19  |
| BTLA      | 1.223 | 0.14   |
| BTN1A1    | 2.902 | 0.58   |
| BTN2A1    | 4.803 | 7.68   |
| BTN2A2    | 3.565 | 16.26  |
| BTN2A3    | 1.761 | 1.48   |
| BTN3A1    | 3.416 | 18.94  |
| BTN3A2    | 3.812 | 34.09  |
| BTN3A3    | 3.287 | 16.76  |
| BTNL2     | 4.104 | 0.02   |
| BTNL3     | 2.693 | 0      |
| BTNL8     | 2.147 | 0.08   |
| BTNL9     | 3.469 | 13.77  |
| BTRC      | 6.121 | 5.01   |
| BUB1      | 3.482 | 7.69   |
| BUB1B     | 3.714 | 5.01   |
| BUB3      | 2.968 | 31.7   |
| BUD13     | 2.193 | 11.64  |
| BUD31     | 2.064 | 12.25  |
| BVES      | 5.583 | 1.44   |
| BXDC1     | 0.949 | 9.15   |
| BXDC2     | 1.273 | 10.12  |
| BXDC5     | 1.268 | 10.89  |
| BYSL      | 1.99  | 17.82  |
| BZRAP1    | 7.804 | 11.13  |
| BZRPL1    | 0.958 | 1.15   |
| BZW1      | 2.798 | 14.51  |
| BZW2      | 3.712 | 14.89  |
| C10orf10  | 1.987 | 104.97 |
| C10orf104 | 3.195 | 25.79  |
| C10orf107 | 1.262 | 0      |

|           |        |       |
|-----------|--------|-------|
| C10orf108 | 2.249  | 0     |
| C10orf11  | 0.896  | 0     |
| C10orf110 | 0.893  | 2.17  |
| C10orf111 | 1.714  | 0.2   |
| C10orf112 | 3.811  | 0     |
| C10orf113 | 0.518  | 0     |
| C10orf114 | 1.967  | 0.13  |
| C10orf115 | 0.634  | 0     |
| C10orf116 | 0.672  | 0.25  |
| C10orf118 | 6.277  | 1.56  |
| C10orf119 | 4.113  | 11.16 |
| C10orf12  | 4.545  | 0.41  |
| C10orf120 | 1.064  | 0     |
| C10orf125 | 0.762  | 7.19  |
| C10orf128 | 4.316  | 7.84  |
| C10orf129 | 2.307  | 0     |
| C10orf130 | 2.467  | 0     |
| C10orf132 | 2.894  | 0     |
| C10orf136 | 1.121  | 0     |
| C10orf137 | 4.579  | 2.04  |
| C10orf18  | 10.129 | 4.7   |
| C10orf22  | 3.724  | 3.96  |
| C10orf25  | 3.078  | 8.57  |
| C10orf26  | 4.087  | 15.39 |
| C10orf27  | 1.583  | 0.16  |
| C10orf28  | 3.315  | 3.76  |
| C10orf30  | 2.239  | 0     |
| C10orf31  | 1.603  | 0.84  |
| C10orf32  | 0.838  | 5.43  |
| C10orf33  | 2.026  | 3.62  |
| C10orf35  | 1.062  | 0.48  |
| C10orf37  | 1.27   | 0.99  |
| C10orf38  | 3.952  | 26.28 |
| C10orf39  | 5.006  | 0     |
| C10orf4   | 5.432  | 1.9   |
| C10orf46  | 4.732  | 2.21  |
| C10orf47  | 3.333  | 2     |
| C10orf49  | 0.826  | 0     |
| C10orf51  | 0.867  | 0.29  |
| C10orf53  | 2.09   | 0     |
| C10orf54  | 4.774  | 56.48 |
| C10orf55  | 2.151  | 0.08  |
| C10orf56  | 4.933  | 2.3   |
| C10orf57  | 2.036  | 9.02  |
| C10orf58  | 1.686  | 6.75  |
| C10orf59  | 2.677  | 0.57  |
| C10orf6   | 7.284  | 3.4   |
| C10orf61  | 3.629  | 9.36  |
| C10orf62  | 1.208  | 0     |
| C10orf63  | 3.318  | 0     |



|          |       |        |
|----------|-------|--------|
| C10orf64 | 3.472 | 2.72   |
| C10orf65 | 2.47  | 0      |
| C10orf67 | 2.943 | 0      |
| C10orf68 | 2.717 | 0.15   |
| C10orf71 | 2.97  | 0.03   |
| C10orf72 | 5.626 | 9.59   |
| C10orf73 | 1.425 | 0      |
| C10orf75 | 1.007 | 0.25   |
| C10orf76 | 2.73  | 10.95  |
| C10orf78 | 1.651 | 0.97   |
| C10orf79 | 5.365 | 0      |
| C10orf80 | 3.313 | 0.36   |
| C10orf81 | 3.249 | 0.05   |
| C10orf82 | 0.994 | 0      |
| C10orf83 | 2.315 | 0.25   |
| C10orf84 | 2.745 | 6.45   |
| C10orf85 | 2.168 | 0      |
| C10orf88 | 2.334 | 1.08   |
| C10orf89 | 1.705 | 1.14   |
| C10orf90 | 3.083 | 0      |
| C10orf91 | 0.738 | 0      |
| C10orf92 | 2.746 | 0      |
| C10orf93 | 1.56  | 0      |
| C10orf95 | 1.469 | 3.1    |
| C10orf96 | 1.699 | 0      |
| C10orf97 | 2.375 | 3.8    |
| C10orf99 | 0.804 | 0      |
| C11orf1  | 2.568 | 2.75   |
| C11orf10 | 0.408 | 149.48 |
| C11orf16 | 1.893 | 0.04   |
| C11orf17 | 1.962 | 12.71  |
| C11orf2  | 2.51  | 88.77  |
| C11orf21 | 0.684 | 0      |
| C11orf24 | 2.05  | 8.83   |
| C11orf30 | 5.889 | 4.02   |
| C11orf31 | 1.294 | 44.79  |
| C11orf34 | 0.895 | 0      |
| C11orf35 | 2.091 | 0.81   |
| C11orf36 | 1.818 | 0      |
| C11orf37 | 2.715 | 0      |
| C11orf38 | 1.64  | 0.15   |
| C11orf39 | 4.004 | 0      |
| C11orf40 | 0.654 | 0      |
| C11orf42 | 1.14  | 0      |
| C11orf44 | 3.547 | 0      |
| C11orf45 | 3.624 | 0      |
| C11orf46 | 1.77  | 7.47   |
| C11orf47 | 3.205 | 0.39   |
| C11orf48 | 1.804 | 25.45  |
| C11orf49 | 3.314 | 4.2    |

|          |       |       |
|----------|-------|-------|
| C11orf51 | 0.884 | 19.91 |
| C11orf52 | 1.104 | 0     |
| C11orf53 | 1.052 | 0     |
| C11orf54 | 2.39  | 3.77  |
| C11orf55 | 2.738 | 0.09  |
| C11orf56 | 3.413 | 8.86  |
| C11orf57 | 3.739 | 9.42  |
| C11orf58 | 1.803 | 43.45 |
| C11orf59 | 1.068 | 58.68 |
| C11orf60 | 1.819 | 7.36  |
| C11orf61 | 2.225 | 1.78  |
| C11orf63 | 3.615 | 1.07  |
| C11orf64 | 0.734 | 0     |
| C11orf65 | 2.713 | 0.06  |
| C11orf66 | 1.531 | 1.93  |
| C11orf67 | 0.504 | 16.88 |
| C11orf68 | 1.557 | 29.11 |
| C11orf69 | 1.672 | 0     |
| C11orf70 | 1.261 | 0     |
| C11orf71 | 1.441 | 4.79  |
| C11orf72 | 2.431 | 0.07  |
| C11orf73 | 1.102 | 12.99 |
| C11orf74 | 0.82  | 5.35  |
| C11orf75 | 0.948 | 7.91  |
| C11orf76 | 1.683 | 0     |
| C11orf77 | 1.967 | 0.94  |
| C11orf79 | 1.209 | 32.67 |
| C11orf9  | 5.745 | 0.16  |
| C12orf10 | 1.2   | 41.63 |
| C12orf11 | 2.635 | 5.53  |
| C12orf12 | 2.962 | 0     |
| C12orf23 | 3.157 | 10.94 |
| C12orf24 | 1.486 | 6.24  |
| C12orf25 | 2.876 | 0.06  |
| C12orf26 | 1.975 | 0.98  |
| C12orf28 | 1.237 | 0     |
| C12orf29 | 2.874 | 1.52  |
| C12orf30 | 5.781 | 2.1   |
| C12orf31 | 1.224 | 11.29 |
| C12orf32 | 1.862 | 13.21 |
| C12orf33 | 2.21  | 0.08  |
| C12orf34 | 2.731 | 0.25  |
| C12orf35 | 6.23  | 5.83  |
| C12orf36 | 2.75  | 0     |
| C12orf37 | 1.378 | 0     |
| C12orf38 | 2.879 | 2.13  |
| C12orf39 | 0.583 | 0     |
| C12orf4  | 3.819 | 1.85  |
| C12orf40 | 2.789 | 0     |
| C12orf41 | 2.15  | 7.4   |

|           |       |        |
|-----------|-------|--------|
| C12orf42  | 1.336 | 0.25   |
| C12orf43  | 1.92  | 6.53   |
| C12orf44  | 1.389 | 22.62  |
| C12orf45  | 0.598 | 15.64  |
| C12orf46  | 1.526 | 1.27   |
| C12orf47  | 2.285 | 6.19   |
| C12orf48  | 3.189 | 1.14   |
| C12orf49  | 2.987 | 8.4    |
| C12orf5   | 1.361 | 4.64   |
| C12orf50  | 1.705 | 0      |
| C12orf51  | 2.694 | 0.47   |
| C12orf52  | 1.775 | 17.23  |
| C12orf53  | 2.17  | 0.27   |
| C12orf54  | 0.685 | 0.12   |
| C12orf55  | 2.343 | 0      |
| C12orf56  | 1.589 | 0      |
| C12orf57  | 0.543 | 394.65 |
| C12orf59  | 2.709 | 0      |
| C12orf60  | 1.123 | 0.15   |
| C12orf61  | 1.684 | 0.1    |
| C12orf62  | 0.601 | 37.56  |
| C12orf63  | 3.686 | 0      |
| C12orf64  | 2.36  | 0      |
| C12orf65  | 2.073 | 4.8    |
| C13orf1   | 3.053 | 3.26   |
| C13orf16  | 0.709 | 1.78   |
| C13orf18  | 2.494 | 1.18   |
| C13orf21  | 0.784 | 0.11   |
| C13orf23  | 5.142 | 10.88  |
| C13orf24  | 3.114 | 1.62   |
| C13orf26  | 0.998 | 0      |
| C13orf27  | 1.147 | 2.35   |
| C13orf28  | 0.757 | 0      |
| C13orf29  | 6.267 | 0.02   |
| C13orf3   | 2.888 | 3.38   |
| C13orf30  | 3.241 | 0      |
| C13orf31  | 2.469 | 0.82   |
| C13orf33  | 2.343 | 0.07   |
| C13orf34  | 2.773 | 3.13   |
| C13orf7   | 3.534 | 2.93   |
| C13orf8   | 3.762 | 5.67   |
| C14orf1   | 2.263 | 12.17  |
| C14orf100 | 1.665 | 9.06   |
| C14orf101 | 4.264 | 2.85   |
| C14orf102 | 4.351 | 1.94   |
| C14orf103 | 4.055 | 2.7    |
| C14orf104 | 1.748 | 4.38   |
| C14orf105 | 2.506 | 0      |
| C14orf106 | 4.568 | 5.79   |
| C14orf108 | 3.069 | 5.49   |

|            |       |        |
|------------|-------|--------|
| C14orf11   | 1.321 | 23.4   |
| C14orf112  | 0.68  | 24.65  |
| C14orf115  | 3.369 | 0      |
| C14orf118  | 2.515 | 3.12   |
| C14orf119  | 2.84  | 13.43  |
| C14orf121  | 4.604 | 0.25   |
| C14orf122  | 0.835 | 7.97   |
| C14orf124  | 1.507 | 35.72  |
| C14orf126  | 2.681 | 2.23   |
| C14orf129  | 2.072 | 1.95   |
| C14orf130  | 3.994 | 10.38  |
| C14orf131  | 1.77  | 5.47   |
| C14orf132  | 7.478 | 1.25   |
| C14orf133  | 2.761 | 8.67   |
| C14orf135  | 2.653 | 5.69   |
| C14orf138  | 1.767 | 3.29   |
| C14orf139  | 3.828 | 16.35  |
| C14orf140  | 2.02  | 0.08   |
| C14orf142  | 1.156 | 6.34   |
| C14orf143  | 2.421 | 0.87   |
| C14orf145  | 4.454 | 1.23   |
| C14orf147  | 2.62  | 5.11   |
| C14orf148  | 0.753 | 0.45   |
| C14orf149  | 1.381 | 1.22   |
| C14orf151  | 1.689 | 8.03   |
| C14orf152  | 1.806 | 0      |
| C14orf153  | 2.491 | 4.53   |
| C14orf155  | 2.915 | 0      |
| C14orf156  | 0.387 | 25.46  |
| C14orf159  | 2.973 | 18.53  |
| C14orf161  | 3.606 | 0      |
| C14orf162  | 1.339 | 0      |
| C14orf165  | 0.93  | 0      |
| C14orf166  | 1.079 | 88.76  |
| C14orf166B | 1.88  | 0      |
| C14orf169  | 2.428 | 8.36   |
| C14orf172  | 2.206 | 10.89  |
| C14orf173  | 4.109 | 23.06  |
| C14orf174  | 2.025 | 0.37   |
| C14orf177  | 1.283 | 0      |
| C14orf178  | 0.891 | 0      |
| C14orf179  | 0.816 | 6.09   |
| C14orf19   | 0.575 | 7.18   |
| C14orf2    | 0.613 | 124.22 |
| C14orf21   | 2.047 | 8.27   |
| C14orf24   | 2.863 | 1.73   |
| C14orf25   | 1.899 | 0      |
| C14orf28   | 2.906 | 0.49   |
| C14orf29   | 1.699 | 0.05   |
| C14orf32   | 6.469 | 12.37  |

|          |        |       |
|----------|--------|-------|
| C14orf37 | 3.082  | 0.03  |
| C14orf39 | 2.747  | 0     |
| C14orf4  | 4.149  | 11    |
| C14orf43 | 8.091  | 5.25  |
| C14orf44 | 2.304  | 1.46  |
| C14orf45 | 2.139  | 1.42  |
| C14orf48 | 1.275  | 0     |
| C14orf49 | 4.133  | 6.24  |
| C14orf50 | 1.405  | 0.18  |
| C14orf54 | 1.754  | 0     |
| C14orf55 | 4.009  | 0.06  |
| C14orf58 | 3.6    | 0.47  |
| C14orf68 | 1.733  | 0     |
| C14orf70 | 1.627  | 0     |
| C14orf72 | 0.642  | 0     |
| C14orf73 | 2.532  | 0.33  |
| C14orf78 | 15.958 | 0.21  |
| C14orf79 | 1.72   | 1.96  |
| C14orf8  | 0.681  | 0     |
| C14orf80 | 1.358  | 2.23  |
| C14orf82 | 2.375  | 0     |
| C14orf83 | 3.082  | 1.59  |
| C14orf85 | 4.701  | 0     |
| C14orf93 | 2.352  | 3.01  |
| C14orf94 | 1.599  | 31.61 |
| C15orf15 | 1.473  | 26.3  |
| C15orf17 | 3.251  | 15.65 |
| C15orf2  | 3.471  | 0     |
| C15orf21 | 3.117  | 0.03  |
| C15orf23 | 1.52   | 8.15  |
| C15orf24 | 1.054  | 40.28 |
| C15orf26 | 2.099  | 0.44  |
| C15orf27 | 2.292  | 0.08  |
| C15orf28 | 3.281  | 0.13  |
| C15orf29 | 2.666  | 2.81  |
| C15orf32 | 1.726  | 0     |
| C15orf33 | 1.989  | 0.17  |
| C15orf34 | 1.562  | 0     |
| C15orf37 | 2.082  | 1.1   |
| C15orf38 | 1.968  | 1.8   |
| C15orf39 | 3.751  | 27.22 |
| C15orf40 | 1.406  | 5.15  |
| C15orf41 | 2.593  | 1.3   |
| C15orf42 | 3.158  | 3.52  |
| C15orf43 | 1.275  | 0     |
| C15orf44 | 2.523  | 16.16 |
| C15orf45 | 1.787  | 0     |
| C15orf48 | 1.035  | 0     |
| C15orf49 | 0.1    | 0     |
| C15orf5  | 1.512  | 0     |

|          |       |       |
|----------|-------|-------|
| C15orf51 | 3.831 | 0.7   |
| C16orf14 | 0.91  | 7.59  |
| C16orf24 | 0.858 | 9.42  |
| C16orf28 | 2.491 | 2.1   |
| C16orf3  | 0.994 | 0.17  |
| C16orf30 | 1.854 | 27.63 |
| C16orf33 | 1.673 | 14.96 |
| C16orf35 | 2.752 | 15.73 |
| C16orf42 | 1.204 | 38.76 |
| C16orf44 | 3.098 | 7.18  |
| C16orf45 | 2.032 | 16.58 |
| C16orf46 | 1.553 | 0.65  |
| C16orf47 | 1.307 | 0.07  |
| C16orf48 | 1.538 | 8.82  |
| C16orf5  | 2.755 | 26.21 |
| C16orf53 | 1.143 | 14.15 |
| C16orf54 | 2.581 | 6.53  |
| C16orf55 | 2.19  | 1.69  |
| C16orf57 | 2.254 | 25.19 |
| C16orf58 | 2.76  | 48.77 |
| C16orf59 | 1.628 | 2.48  |
| C16orf61 | 0.718 | 12.55 |
| C16orf63 | 2.25  | 7.23  |
| C16orf65 | 1.028 | 0.08  |
| C16orf68 | 1.57  | 3.81  |
| C16orf69 | 2.097 | 2.57  |
| C16orf7  | 3.312 | 6.2   |
| C16orf70 | 2.841 | 5.63  |
| C16orf71 | 2.706 | 0.19  |
| C16orf72 | 4.485 | 5.09  |
| C16orf73 | 1.317 | 0     |
| C16orf74 | 0.447 | 0.19  |
| C16orf75 | 1.432 | 4.12  |
| C16orf77 | 1.606 | 0.05  |
| C16orf78 | 0.973 | 0.08  |
| C16orf79 | 0.973 | 2.42  |
| C16orf80 | 1.292 | 35.53 |
| C16orf81 | 0.489 | 0     |
| C17orf25 | 1.792 | 16.21 |
| C17orf28 | 3.258 | 0.03  |
| C17orf32 | 1.449 | 7.9   |
| C17orf37 | 0.754 | 69.6  |
| C17orf38 | 2.725 | 6.46  |
| C17orf39 | 4.232 | 3.56  |
| C17orf42 | 1.659 | 1.67  |
| C17orf45 | 1.301 | 936.7 |
| C17orf46 | 1.284 | 0.13  |
| C17orf47 | 2.077 | 0.28  |
| C17orf48 | 1.518 | 11.04 |
| C17orf49 | 0.827 | 85.76 |

|          |        |       |
|----------|--------|-------|
| C17orf50 | 1.014  | 0.17  |
| C17orf51 | 5.654  | 0     |
| C17orf53 | 2.672  | 2.36  |
| C17orf54 | 1.667  | 0     |
| C17orf55 | 2.97   | 0.03  |
| C17orf56 | 2.249  | 7.98  |
| C17orf57 | 3.931  | 0.54  |
| C17orf58 | 2.708  | 0.44  |
| C17orf59 | 1.74   | 10.75 |
| C17orf60 | 1.957  | 31.68 |
| C17orf61 | 0.448  | 72.01 |
| C17orf62 | 2.327  | 53.58 |
| C17orf63 | 3.432  | 2.09  |
| C17orf64 | 0.928  | 0.91  |
| C17orf65 | 2.252  | 9.87  |
| C17orf66 | 1.969  | 0     |
| C17orf67 | 0.372  | 0.45  |
| C17orf68 | 4.02   | 6.12  |
| C17orf69 | 1.219  | 1.1   |
| C17orf70 | 3.821  | 9.98  |
| C17orf71 | 3.234  | 4.11  |
| C17orf73 | 2.762  | 0     |
| C17orf74 | 1.65   | 0     |
| C17orf75 | 1.623  | 4.26  |
| C17orf76 | 2.71   | 1.61  |
| C17orf77 | 2.525  | 0     |
| C17orf78 | 1.862  | 0     |
| C17orf79 | 0.855  | 12.02 |
| C17orf80 | 2.127  | 5.82  |
| C17orf81 | 3.302  | 17.55 |
| C17orf82 | 1.53   | 0     |
| C17orf83 | 1.644  | 0     |
| C17orf85 | 2.708  | 9.64  |
| C18orf1  | 17.629 | 6.49  |
| C18orf10 | 2.065  | 19.87 |
| C18orf16 | 2.392  | 0     |
| C18orf17 | 2.614  | 9.38  |
| C18orf19 | 1.941  | 2.56  |
| C18orf2  | 1.328  | 0     |
| C18orf20 | 0.873  | 0     |
| C18orf21 | 1.039  | 6.81  |
| C18orf22 | 1.407  | 15.14 |
| C18orf24 | 3.091  | 2.02  |
| C18orf25 | 5.424  | 1.6   |
| C18orf26 | 2.027  | 0     |
| C18orf34 | 3.087  | 0     |
| C18orf37 | 1.061  | 21.52 |
| C18orf45 | 2.941  | 3.29  |
| C18orf51 | 2.053  | 15.67 |
| C18orf54 | 5.007  | 0.43  |

|          |       |        |
|----------|-------|--------|
| C18orf55 | 1.319 | 7.03   |
| C18orf56 | 0.844 | 0.9    |
| C18orf58 | 2.346 | 0      |
| C18orf8  | 2.173 | 11.98  |
| C19orf10 | 1.051 | 64.36  |
| C19orf12 | 3.396 | 6.55   |
| C19orf15 | 3.5   | 0.05   |
| C19orf16 | 2.282 | 0      |
| C19orf18 | 0.917 | 1.47   |
| C19orf19 | 1.59  | 0      |
| C19orf2  | 2.425 | 13.72  |
| C19orf20 | 1.919 | 7.6    |
| C19orf21 | 2.851 | 0.06   |
| C19orf22 | 1.784 | 34.23  |
| C19orf23 | 1.356 | 0.49   |
| C19orf24 | 1.524 | 25.87  |
| C19orf25 | 2.131 | 8.06   |
| C19orf26 | 2.407 | 0      |
| C19orf28 | 3.096 | 45.71  |
| C19orf29 | 3.625 | 11.25  |
| C19orf30 | 0.696 | 0      |
| C19orf31 | 2.278 | 6.07   |
| C19orf33 | 0.461 | 2.92   |
| C19orf34 | 1.264 | 0.07   |
| C19orf35 | 2.564 | 0.3    |
| C19orf36 | 1.015 | 2.57   |
| C19orf39 | 1.662 | 1.27   |
| C19orf4  | 1.562 | 0      |
| C19orf40 | 1.122 | 1.8    |
| C19orf41 | 0.814 | 0      |
| C19orf42 | 1.145 | 12.73  |
| C19orf43 | 0.91  | 298.8  |
| C19orf44 | 3.325 | 1.65   |
| C19orf45 | 1.639 | 0.05   |
| C19orf46 | 1.541 | 0.22   |
| C19orf47 | 2.126 | 7.05   |
| C19orf48 | 1.811 | 45.17  |
| C19orf49 | 0.804 | 13.62  |
| C19orf50 | 1.42  | 46.39  |
| C19orf51 | 3.174 | 0.19   |
| C19orf52 | 1.397 | 7.23   |
| C19orf53 | 0.568 | 160.91 |
| C19orf54 | 2.455 | 8.57   |
| C19orf55 | 2.147 | 3.14   |
| C19orf56 | 0.839 | 75.7   |
| C19orf57 | 2.42  | 1.11   |
| C19orf58 | 1.055 | 27.39  |
| C19orf59 | 2.352 | 24.6   |
| C19orf6  | 4.216 | 40.24  |
| C19orf7  | 6.116 | 14.35  |



|           |       |       |
|-----------|-------|-------|
| C1D       | 1.215 | 2.15  |
| C1GALT1   | 3.554 | 0.5   |
| C1GALT1C1 | 1.838 | 4.21  |
| C1orf100  | 0.579 | 0     |
| C1orf101  | 3.019 | 0.17  |
| C1orf102  | 1.662 | 1.06  |
| C1orf103  | 3.932 | 2.79  |
| C1orf104  | 1.306 | 2.19  |
| C1orf105  | 0.98  | 0     |
| C1orf106  | 4.098 | 1.38  |
| C1orf107  | 8.463 | 1.12  |
| C1orf108  | 1.967 | 16.87 |
| C1orf109  | 2.355 | 3.76  |
| C1orf110  | 2.605 | 0     |
| C1orf111  | 0.888 | 0     |
| C1orf112  | 3.363 | 1.13  |
| C1orf113  | 3.182 | 1.61  |
| C1orf114  | 1.866 | 0     |
| C1orf115  | 2.934 | 0.03  |
| C1orf116  | 5.49  | 0.02  |
| C1orf117  | 1.669 | 0.05  |
| C1orf118  | 2.261 | 0     |
| C1orf119  | 2.75  | 9.31  |
| C1orf120  | 0.74  | 0     |
| C1orf121  | 4.071 | 4.49  |
| C1orf122  | 0.822 | 14.55 |
| C1orf123  | 1.085 | 29.66 |
| C1orf124  | 5.74  | 0.65  |
| C1orf125  | 3.479 | 0.6   |
| C1orf126  | 2.962 | 0     |
| C1orf127  | 2.262 | 0     |
| C1orf128  | 1.615 | 27.23 |
| C1orf129  | 2.223 | 0     |
| C1orf130  | 3.583 | 0.03  |
| C1orf131  | 1.435 | 6.16  |
| C1orf133  | 3.505 | 0     |
| C1orf135  | 2.061 | 0.7   |
| C1orf137  | 0.386 | 0     |
| C1orf138  | 1.914 | 1.54  |
| C1orf14   | 2.365 | 0     |
| C1orf140  | 4.492 | 0     |
| C1orf141  | 2.143 | 0     |
| C1orf142  | 2.362 | 28.82 |
| C1orf144  | 2.848 | 82.02 |
| C1orf145  | 2.889 | 0     |
| C1orf146  | 0.751 | 0     |
| C1orf147  | 2.096 | 0     |
| C1orf149  | 2.147 | 19.07 |
| C1orf150  | 2.628 | 0     |
| C1orf151  | 2.589 | 6.38  |

|          |        |       |
|----------|--------|-------|
| C1orf156 | 1.445  | 1.34  |
| C1orf157 | 1.891  | 0     |
| C1orf158 | 1.019  | 0     |
| C1orf159 | 3.214  | 1.86  |
| C1orf160 | 1.528  | 23.1  |
| C1orf161 | 3.229  | 0     |
| C1orf162 | 0.917  | 8.54  |
| C1orf163 | 1.614  | 6.68  |
| C1orf164 | 3.01   | 29.16 |
| C1orf165 | 1.364  | 16.86 |
| C1orf166 | 2.436  | 9.13  |
| C1orf167 | 5.515  | 0.34  |
| C1orf168 | 3.134  | 0     |
| C1orf170 | 3.064  | 0     |
| C1orf172 | 1.785  | 0     |
| C1orf173 | 7.159  | 0     |
| C1orf174 | 1.658  | 8.63  |
| C1orf175 | 4.349  | 0.02  |
| C1orf176 | 2.217  | 2.58  |
| C1orf177 | 1.777  | 0     |
| C1orf178 | 0.904  | 0     |
| C1orf179 | 1.975  | 0     |
| C1orf180 | 2.884  | 0     |
| C1orf181 | 2.797  | 10.57 |
| C1orf182 | 0.753  | 0     |
| C1orf183 | 2.369  | 1.5   |
| C1orf184 | 0.846  | 0     |
| C1orf185 | 0.911  | 0     |
| C1orf186 | 1.665  | 0.1   |
| C1orf187 | 1.773  | 0.29  |
| C1orf189 | 0.387  | 0     |
| C1orf19  | 1.925  | 15.01 |
| C1orf190 | 2.08   | 0.85  |
| C1orf191 | 1.027  | 0     |
| C1orf192 | 0.774  | 2.61  |
| C1orf194 | 0.731  | 0.12  |
| C1orf198 | 3.735  | 0.61  |
| C1orf2   | 3.19   | 14.5  |
| C1orf201 | 2.501  | 1.44  |
| C1orf21  | 10.308 | 1.27  |
| C1orf210 | 1.467  | 0     |
| C1orf211 | 1.265  | 0     |
| C1orf212 | 2.53   | 10.85 |
| C1orf213 | 3.377  | 0.85  |
| C1orf215 | 1.783  | 0.09  |
| C1orf25  | 4.359  | 2.09  |
| C1orf26  | 3.753  | 0.7   |
| C1orf27  | 3.784  | 2.36  |
| C1orf31  | 0.641  | 6.83  |
| C1orf32  | 2.572  | 0     |

|         |       |       |
|---------|-------|-------|
| C1orf34 | 8.621 | 0     |
| C1orf35 | 1.29  | 8.1   |
| C1orf38 | 2.686 | 36.06 |
| C1orf41 | 0.582 | 12.88 |
| C1orf43 | 2.561 | 52.56 |
| C1orf49 | 1.025 | 0.08  |
| C1orf50 | 0.989 | 7.07  |
| C1orf51 | 1.742 | 0.54  |
| C1orf52 | 1.214 | 6.25  |
| C1orf53 | 0.588 | 0.29  |
| C1orf54 | 0.504 | 13.71 |
| C1orf55 | 3.934 | 4.41  |
| C1orf56 | 2.053 | 2.63  |
| C1orf57 | 1.084 | 29.68 |
| C1orf58 | 1.682 | 3.65  |
| C1orf59 | 1.867 | 8.57  |
| C1orf61 | 0.879 | 0     |
| C1orf62 | 3.05  | 0     |
| C1orf63 | 1.865 | 20.01 |
| C1orf64 | 0.921 | 0     |
| C1orf65 | 2.045 | 0     |
| C1orf66 | 2.243 | 6.46  |
| C1orf67 | 2.243 | 0     |
| C1orf69 | 7.817 | 1.82  |
| C1orf70 | 0.522 | 0.16  |
| C1orf71 | 3.895 | 6.19  |
| C1orf74 | 1.561 | 0.97  |
| C1orf75 | 2.475 | 4.5   |
| C1orf76 | 2.909 | 0     |
| C1orf77 | 1.925 | 46.95 |
| C1orf78 | 1.054 | 10.63 |
| C1orf80 | 2.485 | 1.59  |
| C1orf82 | 3.026 | 1.78  |
| C1orf83 | 4.097 | 2.36  |
| C1orf84 | 7.861 | 0.42  |
| C1orf85 | 1.585 | 16.58 |
| C1orf86 | 2.216 | 15.13 |
| C1orf87 | 2.012 | 0     |
| C1orf88 | 2.289 | 0.11  |
| C1orf89 | 1.334 | 2.65  |
| C1orf9  | 6.327 | 2.25  |
| C1orf90 | 0.936 | 3.78  |
| C1orf91 | 1.866 | 2.71  |
| C1orf92 | 1.907 | 0.14  |
| C1orf93 | 2.709 | 7.12  |
| C1orf94 | 2.287 | 0     |
| C1orf95 | 4.093 | 0     |
| C1orf96 | 5.161 | 1.29  |
| C1orf97 | 0.694 | 0.85  |
| C1orf99 | 2.396 | 0     |

|          |       |        |
|----------|-------|--------|
| C1QA     | 1.098 | 5.75   |
| C1QB     | 1.044 | 11.22  |
| C1QBP    | 1.163 | 131.67 |
| C1QBPP   | 1.006 | 4.78   |
| C1QC     | 1.139 | 6.59   |
| C1QDC1   | 6.007 | 0.71   |
| C1QDC2   | 1.036 | 0.16   |
| C1QL1    | 1.5   | 0      |
| C1QL2    | 2.049 | 0      |
| C1QL3    | 2.493 | 0.44   |
| C1QL4    | 2.065 | 0      |
| C1QTNF1  | 3.17  | 0.4    |
| C1QTNF2  | 2.392 | 0.46   |
| C1QTNF3  | 3.856 | 0.42   |
| C1QTNF4  | 1.364 | 174.46 |
| C1QTNF5  | 1.341 | 0.13   |
| C1QTNF6  | 3.674 | 1.19   |
| C1QTNF7  | 3.942 | 0      |
| C1QTNF8  | 2.974 | 0      |
| C1QTNF9  | 1.826 | 0.05   |
| C1R      | 1.096 | 16.29  |
| C1RL     | 3.319 | 9.72   |
| C1S      | 3.009 | 6.81   |
| C2       | 7.827 | 0.04   |
| C2orf10  | 0.981 | 0.34   |
| C2orf100 | 2.519 | 0.24   |
| C2orf102 | 1.952 | 0      |
| C2orf103 | 1.776 | 0      |
| C2orf106 | 0.905 | 0.47   |
| C2orf107 | 0.694 | 0.6    |
| C2orf108 | 3.034 | 12.6   |
| C2orf11  | 4.427 | 17.52  |
| C2orf111 | 1.572 | 8.95   |
| C2orf112 | 2.59  | 4.81   |
| C2orf114 | 1.727 | 0      |
| C2orf116 | 1.254 | 23.31  |
| C2orf117 | 4.587 | 5.53   |
| C2orf118 | 2.932 | 6.52   |
| C2orf119 | 2.129 | 1.7    |
| C2orf12  | 3.291 | 0.43   |
| C2orf121 | 6.215 | 1.73   |
| C2orf123 | 1.96  | 0.21   |
| C2orf132 | 3.784 | 0.67   |
| C2orf133 | 5.513 | 0.81   |
| C2orf134 | 2.028 | 0.58   |
| C2orf135 | 1.776 | 3.89   |
| C2orf141 | 0.727 | 0      |
| C2orf142 | 0.958 | 1.67   |
| C2orf144 | 0.541 | 0      |
| C2orf149 | 0.777 | 190.92 |

|           |       |        |
|-----------|-------|--------|
| C20orf151 | 2.793 | 0      |
| C20orf152 | 2.866 | 11.87  |
| C20orf160 | 2.523 | 0.24   |
| C20orf165 | 0.719 | 0.24   |
| C20orf166 | 1.213 | 0      |
| C20orf173 | 1.034 | 0      |
| C20orf174 | 6.327 | 0.16   |
| C20orf175 | 2.698 | 0.09   |
| C20orf177 | 3.808 | 1.88   |
| C20orf179 | 0.761 | 0      |
| C20orf185 | 1.454 | 0      |
| C20orf186 | 2.042 | 0      |
| C20orf189 | 0.183 | 0      |
| C20orf19  | 2.129 | 5.66   |
| C20orf191 | 0.476 | 0      |
| C20orf195 | 1.112 | 0      |
| C20orf196 | 1.154 | 3.36   |
| C20orf197 | 2.732 | 0      |
| C20orf198 | 2.532 | 2.63   |
| C20orf20  | 1.603 | 15.92  |
| C20orf23  | 5.261 | 4.58   |
| C20orf24  | 1.632 | 26.28  |
| C20orf26  | 4.082 | 0      |
| C20orf27  | 1.376 | 322.99 |
| C20orf28  | 1.585 | 0.21   |
| C20orf29  | 1.832 | 9.52   |
| C20orf3   | 2.221 | 37.54  |
| C20orf30  | 2.508 | 31.2   |
| C20orf32  | 2.545 | 0.14   |
| C20orf39  | 2.437 | 8.43   |
| C20orf4   | 2.647 | 14.06  |
| C20orf42  | 5.151 | 0      |
| C20orf43  | 1.607 | 78.32  |
| C20orf44  | 3.974 | 5.4    |
| C20orf46  | 1.72  | 0.1    |
| C20orf51  | 1.631 | 0.05   |
| C20orf52  | 0.477 | 79.46  |
| C20orf54  | 2.598 | 0      |
| C20orf55  | 1.748 | 59.03  |
| C20orf56  | 4.547 | 0      |
| C20orf58  | 1.425 | 0      |
| C20orf59  | 3.025 | 19.66  |
| C20orf62  | 0.7   | 0      |
| C20orf67  | 2.697 | 19.58  |
| C20orf7   | 1.157 | 1.96   |
| C20orf70  | 1.052 | 0      |
| C20orf71  | 1.124 | 0      |
| C20orf72  | 2.126 | 14.3   |
| C20orf74  | 5.617 | 1.08   |
| C20orf75  | 2.671 | 0      |

|           |       |       |
|-----------|-------|-------|
| C20orf77  | 4.219 | 4.04  |
| C20orf79  | 0.667 | 0     |
| C20orf82  | 2.587 | 0     |
| C20orf85  | 0.76  | 0     |
| C20orf86  | 1.014 | 0     |
| C20orf91  | 2.786 | 0.06  |
| C20orf94  | 1.407 | 2.4   |
| C20orf95  | 1.869 | 0     |
| C20orf96  | 1.555 | 7.53  |
| C21orf100 | 0.514 | 0     |
| C21orf114 | 2.048 | 0     |
| C21orf119 | 0.821 | 3.38  |
| C21orf121 | 0.777 | 0     |
| C21orf123 | 2.341 | 0     |
| C21orf124 | 1.972 | 1.24  |
| C21orf125 | 3.013 | 0.08  |
| C21orf128 | 2.055 | 0.08  |
| C21orf129 | 2.033 | 0     |
| C21orf13  | 2.364 | 0.03  |
| C21orf2   | 3.52  | 12.69 |
| C21orf24  | 3.57  | 0     |
| C21orf25  | 5.823 | 0.68  |
| C21orf29  | 3.967 | 0     |
| C21orf33  | 1.653 | 50.25 |
| C21orf34  | 1.322 | 0     |
| C21orf37  | 0.714 | 0     |
| C21orf41  | 1.02  | 1.24  |
| C21orf45  | 1.571 | 3.7   |
| C21orf49  | 2.464 | 0.2   |
| C21orf51  | 1.193 | 5.65  |
| C21orf55  | 2.027 | 0.2   |
| C21orf56  | 1.085 | 5.97  |
| C21orf57  | 1.977 | 3.2   |
| C21orf58  | 4.182 | 2.44  |
| C21orf59  | 1.306 | 27.02 |
| C21orf6   | 1.712 | 7.87  |
| C21orf62  | 3.99  | 0.02  |
| C21orf63  | 1.933 | 0.35  |
| C21orf66  | 3.721 | 2.58  |
| C21orf67  | 1.033 | 0.49  |
| C21orf69  | 1.595 | 0.53  |
| C21orf7   | 1.997 | 3.29  |
| C21orf70  | 0.881 | 6.98  |
| C21orf77  | 1.452 | 0     |
| C21orf81  | 1.095 | 0     |
| C21orf84  | 0.579 | 0     |
| C21orf86  | 1.178 | 0.57  |
| C21orf87  | 1     | 0.59  |
| C21orf88  | 1.071 | 0     |
| C21orf90  | 0.824 | 0.31  |

|          |       |        |
|----------|-------|--------|
| C21orf91 | 1.509 | 2.35   |
| C21orf93 | 2.323 | 0.03   |
| C21orf94 | 0.309 | 0      |
| C21orf99 | 0.558 | 0      |
| C22orf13 | 3.607 | 21.23  |
| C22orf15 | 2.02  | 4.59   |
| C22orf16 | 0.682 | 101.41 |
| C22orf23 | 2.294 | 9.25   |
| C22orf25 | 2.686 | 13.95  |
| C22orf26 | 1.836 | 1.15   |
| C22orf27 | 1.929 | 4.59   |
| C22orf28 | 2.02  | 41.41  |
| C22orf29 | 6.595 | 3.04   |
| C22orf30 | 2.074 | 2.6    |
| C22orf31 | 1.07  | 0      |
| C22orf32 | 1.567 | 40.42  |
| C22orf33 | 0.981 | 0      |
| C22orf34 | 2.024 | 5.37   |
| C22orf36 | 2.943 | 0.11   |
| C22orf5  | 3.587 | 11.13  |
| C22orf9  | 6.417 | 17.86  |
| C2orf13  | 3.798 | 0.65   |
| C2orf15  | 1.43  | 0      |
| C2orf16  | 6.199 | 0.19   |
| C2orf17  | 3.135 | 38.64  |
| C2orf18  | 3.912 | 5.55   |
| C2orf19  | 3.106 | 0      |
| C2orf21  | 2.771 | 0.03   |
| C2orf24  | 2.059 | 42.91  |
| C2orf25  | 1.38  | 30.33  |
| C2orf27  | 1.221 | 0.2    |
| C2orf28  | 1.964 | 30.11  |
| C2orf29  | 2.483 | 12.18  |
| C2orf3   | 5.185 | 1.67   |
| C2orf30  | 2.41  | 9.08   |
| C2orf32  | 1.658 | 0.31   |
| C2orf33  | 2.011 | 16.04  |
| C2orf34  | 1.493 | 1.18   |
| C2orf37  | 2.459 | 1.54   |
| C2orf39  | 2.49  | 0      |
| C2orf40  | 0.781 | 0.11   |
| C2orf42  | 2.524 | 3.81   |
| C2orf43  | 2.856 | 4.24   |
| C2orf44  | 3.784 | 3.63   |
| C2orf46  | 2.342 | 0      |
| C2orf47  | 1.504 | 3.7    |
| C2orf48  | 1.902 | 0.08   |
| C2orf49  | 0.887 | 2.57   |
| C2orf4P  | 2.154 | 3.36   |
| C2orf50  | 2.686 | 0      |

|         |       |       |
|---------|-------|-------|
| C2orf51 | 0.795 | 0     |
| C2orf52 | 1.282 | 0.92  |
| C2orf53 | 2.001 | 0     |
| C2orf7  | 1.083 | 11.9  |
| C3      | 5.067 | 0.07  |
| C3AR1   | 1.955 | 0.99  |
| C3orf1  | 1.596 | 17.05 |
| C3orf10 | 1.176 | 98.41 |
| C3orf14 | 0.765 | 0     |
| C3orf15 | 4.171 | 0     |
| C3orf16 | 2.035 | 0     |
| C3orf17 | 5.32  | 4.09  |
| C3orf18 | 2.655 | 3.62  |
| C3orf19 | 2.94  | 6.16  |
| C3orf20 | 3.278 | 0     |
| C3orf21 | 2.703 | 10.88 |
| C3orf22 | 0.947 | 0     |
| C3orf23 | 6.964 | 1.42  |
| C3orf24 | 1.014 | 0     |
| C3orf25 | 2.154 | 0     |
| C3orf26 | 1.198 | 14.49 |
| C3orf27 | 2.697 | 0     |
| C3orf28 | 0.838 | 11.26 |
| C3orf30 | 1.814 | 0     |
| C3orf31 | 1.253 | 3.76  |
| C3orf32 | 1.542 | 0.11  |
| C3orf33 | 1.931 | 0.52  |
| C3orf34 | 1.378 | 1.22  |
| C3orf35 | 3.056 | 0     |
| C3orf36 | 1.668 | 0     |
| C3orf37 | 2.658 | 24.12 |
| C3orf38 | 1.367 | 4.44  |
| C3orf39 | 2.541 | 1.39  |
| C3orf40 | 3.677 | 1.77  |
| C3orf41 | 0.679 | 0     |
| C3orf42 | 1.328 | 1.78  |
| C3orf43 | 3.063 | 0     |
| C3orf44 | 2.053 | 0.13  |
| C3orf45 | 1.434 | 1.76  |
| C3orf46 | 1.107 | 0     |
| C3orf47 | 0.362 | 0.7   |
| C3orf48 | 1.584 | 0.05  |
| C3orf49 | 1.045 | 0.08  |
| C3orf52 | 2.221 | 1.1   |
| C3orf53 | 0.912 | 0     |
| C3orf54 | 1.04  | 41.06 |
| C3orf55 | 0.937 | 0     |
| C3orf56 | 1.737 | 0.2   |
| C3orf57 | 2.306 | 0     |
| C3orf58 | 4.077 | 1.8   |



|         |        |       |
|---------|--------|-------|
| C3orf59 | 3.368  | 0     |
| C3orf60 | 2.829  | 27.3  |
| C3orf62 | 3.345  | 1.59  |
| C3orf63 | 7.377  | 5.78  |
| C3orf64 | 4.138  | 0.96  |
| C3orf65 | 1.924  | 0     |
| C3orf66 | 2.52   | 0     |
| C4A     | 5.426  | 0     |
| C4B     | 16.278 | 0     |
| C4BPA   | 2.243  | 0     |
| C4BPAL2 | 0.2    | 0     |
| C4BPB   | 1.496  | 0.62  |
| C4orf11 | 0.848  | 0     |
| C4orf12 | 6.354  | 0.2   |
| C4orf14 | 2.272  | 19.54 |
| C4orf15 | 5.6    | 0.92  |
| C4orf16 | 2.817  | 2.96  |
| C4orf17 | 1.597  | 0     |
| C4orf18 | 7.615  | 0.03  |
| C4orf19 | 1.935  | 0.13  |
| C4orf20 | 1.559  | 7.51  |
| C4orf21 | 3.337  | 0.23  |
| C4orf22 | 0.889  | 0     |
| C4orf23 | 1.851  | 3.5   |
| C4orf26 | 0.706  | 0     |
| C4orf27 | 1.171  | 6.62  |
| C4orf28 | 1.814  | 1.58  |
| C4orf29 | 2.2    | 2.14  |
| C4orf30 | 2.773  | 5.01  |
| C4orf31 | 2.767  | 0     |
| C4orf32 | 2.593  | 12.83 |
| C4orf33 | 1.784  | 1.61  |
| C4orf34 | 1.669  | 4.39  |
| C4orf35 | 1.544  | 0     |
| C4orf36 | 0.828  | 0.1   |
| C4orf6  | 0.873  | 0     |
| C4orf7  | 0.539  | 0     |
| C4orf8  | 4.733  | 11.3  |
| C5      | 5.465  | 0.68  |
| C5AR1   | 2.321  | 0.43  |
| C5orf13 | 2.019  | 22.57 |
| C5orf14 | 3.689  | 5.75  |
| C5orf15 | 2.35   | 24.23 |
| C5orf16 | 2.505  | 1.15  |
| C5orf20 | 3.135  | 0.56  |
| C5orf21 | 4.178  | 3.22  |
| C5orf22 | 2.899  | 3.87  |
| C5orf23 | 2.875  | 0     |
| C5orf24 | 4.259  | 1.72  |
| C5orf25 | 3.577  | 2.28  |

|          |        |       |
|----------|--------|-------|
| C5orf26  | 1      | 23.75 |
| C5orf27  | 1.796  | 0.14  |
| C5orf28  | 2.936  | 0.29  |
| C5orf29  | 2.216  | 0.15  |
| C5orf3   | 2.886  | 4.38  |
| C5orf30  | 3.01   | 2.12  |
| C5orf32  | 0.82   | 11.51 |
| C5orf33  | 2.507  | 2.96  |
| C5orf34  | 2.44   | 0.83  |
| C5orf35  | 1.554  | 2.01  |
| C5orf36  | 1.992  | 0.04  |
| C5orf37  | 1.698  | 5.21  |
| C5orf38  | 0.89   | 0     |
| C5orf4   | 6.852  | 3.21  |
| C5orf5   | 5.465  | 6.93  |
| C6       | 3.551  | 0.03  |
| C6orf1   | 1.479  | 8.89  |
| C6orf10  | 6.402  | 0     |
| C6orf103 | 6.779  | 0     |
| C6orf105 | 1.569  | 0     |
| C6orf106 | 4.419  | 20.06 |
| C6orf107 | 4.923  | 1.1   |
| C6orf108 | 1.161  | 12.26 |
| C6orf111 | 2.871  | 53.26 |
| C6orf113 | 2.197  | 1.53  |
| C6orf114 | 1.527  | 0.71  |
| C6orf115 | 1.213  | 24.58 |
| C6orf117 | 2.207  | 0     |
| C6orf118 | 1.814  | 0     |
| C6orf12  | 3.659  | 0     |
| C6orf120 | 4.146  | 3.88  |
| C6orf122 | 2.418  | 0     |
| C6orf123 | 1.652  | 0.15  |
| C6orf125 | 0.506  | 43.78 |
| C6orf128 | 1.546  | 5.83  |
| C6orf129 | 0.607  | 10.83 |
| C6orf130 | 1.174  | 9.33  |
| C6orf134 | 11.235 | 0.03  |
| C6orf136 | 4.437  | 0     |
| C6orf137 | 3.198  | 0     |
| C6orf141 | 1.825  | 0     |
| C6orf142 | 1.738  | 0     |
| C6orf145 | 1.867  | 8.4   |
| C6orf146 | 2.196  | 0     |
| C6orf148 | 2.015  | 0.5   |
| C6orf15  | 3.408  | 0     |
| C6orf150 | 1.887  | 2.28  |
| C6orf151 | 4.173  | 3.05  |
| C6orf152 | 4.719  | 0     |
| C6orf153 | 1.159  | 19.55 |

|          |        |       |
|----------|--------|-------|
| C6orf154 | 2.121  | 0     |
| C6orf155 | 2.933  | 0     |
| C6orf157 | 1.833  | 0.97  |
| C6orf159 | 0.664  | 0     |
| C6orf162 | 1.802  | 1.78  |
| C6orf163 | 2.11   | 0.56  |
| C6orf165 | 3.45   | 0.03  |
| C6orf166 | 1.613  | 22.14 |
| C6orf167 | 4.269  | 0.99  |
| C6orf168 | 2.017  | 0     |
| C6orf170 | 3.431  | 0.05  |
| C6orf173 | 0.527  | 16.94 |
| C6orf174 | 3.556  | 0.07  |
| C6orf176 | 1.136  | 0     |
| C6orf182 | 2.508  | 1.51  |
| C6orf184 | 0.827  | 1.02  |
| C6orf185 | 1.183  | 17.09 |
| C6orf188 | 3.539  | 0.65  |
| C6orf189 | 1.033  | 0     |
| C6orf190 | 4.03   | 0.04  |
| C6orf191 | 0.545  | 0     |
| C6orf192 | 2.425  | 1.98  |
| C6orf194 | 1.639  | 0.05  |
| C6orf195 | 2.434  | 0     |
| C6orf199 | 2.563  | 0.56  |
| C6orf201 | 2.403  | 0.42  |
| C6orf203 | 0.899  | 10.78 |
| C6orf204 | 1.722  | 0.69  |
| C6orf205 | 10.938 | 0     |
| C6orf206 | 0.915  | 0     |
| C6orf208 | 2.318  | 0     |
| C6orf21  | 2.694  | 0     |
| C6orf211 | 2.572  | 3.14  |
| C6orf213 | 2.01   | 0     |
| C6orf218 | 1.078  | 0     |
| C6orf25  | 4.311  | 0.18  |
| C6orf26  | 1.831  | 2.3   |
| C6orf27  | 5.118  | 0.02  |
| C6orf32  | 2.685  | 11.23 |
| C6orf35  | 2.959  | 0     |
| C6orf47  | 7.426  | 0     |
| C6orf48  | 2.526  | 0     |
| C6orf49  | 2.507  | 54.64 |
| C6orf51  | 0.941  | 24.62 |
| C6orf52  | 0.497  | 0.17  |
| C6orf54  | 2.8    | 0.03  |
| C6orf55  | 3.244  | 8.26  |
| C6orf57  | 0.525  | 5.46  |
| C6orf58  | 1.2    | 0.07  |
| C6orf59  | 1.848  | 0.87  |

|          |       |       |
|----------|-------|-------|
| C6orf60  | 4.044 | 0     |
| C6orf62  | 3.979 | 38.02 |
| C6orf64  | 1.92  | 4.56  |
| C6orf65  | 2.278 | 0     |
| C6orf66  | 0.698 | 6.64  |
| C6orf70  | 2.078 | 4.33  |
| C6orf72  | 1.113 | 6.05  |
| C6orf78  | 1.311 | 0     |
| C6orf81  | 1.169 | 1.08  |
| C6orf85  | 5.415 | 2.98  |
| C6orf89  | 4.132 | 15.07 |
| C6orf94  | 1.192 | 0     |
| C6orf97  | 5.231 | 0     |
| C7       | 4.012 | 0.17  |
| C7orf10  | 3.216 | 0     |
| C7orf11  | 1.812 | 10.74 |
| C7orf13  | 3.724 | 0.04  |
| C7orf16  | 3.5   | 0     |
| C7orf20  | 4.176 | 6.33  |
| C7orf23  | 2.086 | 5.49  |
| C7orf24  | 2.33  | 8.17  |
| C7orf25  | 3.586 | 1.69  |
| C7orf26  | 3.819 | 14.36 |
| C7orf27  | 5.4   | 6.18  |
| C7orf28A | 3.652 | 8.1   |
| C7orf28B | 3.53  | 6.59  |
| C7orf29  | 5.746 | 1.62  |
| C7orf30  | 1.51  | 6.86  |
| C7orf31  | 7.218 | 1.22  |
| C7orf33  | 2.708 | 0     |
| C7orf34  | 1.54  | 0     |
| C7orf36  | 1.73  | 2.39  |
| C7orf38  | 4.53  | 0.58  |
| C7orf41  | 11.21 | 2.87  |
| C7orf42  | 4.754 | 18.08 |
| C7orf43  | 5.027 | 5.63  |
| C7orf44  | 1.714 | 13.07 |
| C7orf45  | 3.91  | 0     |
| C7orf46  | 2.797 | 0.6   |
| C7orf47  | 1.86  | 13.67 |
| C7orf48  | 2.778 | 8.09  |
| C7orf49  | 2.964 | 10.57 |
| C8A      | 2.358 | 0     |
| C8B      | 2.037 | 0     |
| C8G      | 0.855 | 0.79  |
| C8orf13  | 4.071 | 2.54  |
| C8orf15  | 1.743 | 0     |
| C8orf16  | 2.179 | 0     |
| C8orf17  | 2.781 | 0.03  |
| C8orf22  | 1.261 | 0     |

|          |       |       |
|----------|-------|-------|
| C8orf30A | 2.404 | 6.97  |
| C8orf31  | 1.875 | 0     |
| C8orf32  | 1.348 | 1.56  |
| C8orf33  | 2.615 | 9.24  |
| C8orf34  | 3.652 | 0     |
| C8orf37  | 2.254 | 0.56  |
| C8orf38  | 1.373 | 3.99  |
| C8orf4   | 1.455 | 0.06  |
| C8orf40  | 0.793 | 9.88  |
| C8orf41  | 2.168 | 5.05  |
| C8orf42  | 1.885 | 0     |
| C8orf44  | 1.817 | 2.08  |
| C8orf45  | 2.248 | 0.03  |
| C8orf46  | 3.17  | 0.05  |
| C8orf47  | 1.55  | 0.32  |
| C8orf48  | 1.445 | 0     |
| C8orf49  | 1.968 | 0     |
| C8orf51  | 1.918 | 0.4   |
| C8orf53  | 0.969 | 5.3   |
| C8orf54  | 2.315 | 0     |
| C8orf55  | 2.264 | 8.11  |
| C8orf58  | 2.054 | 5.95  |
| C8orf59  | 0.87  | 24.4  |
| C8orf61  | 1.862 | 1.95  |
| C8orf62  | 1.106 | 0.08  |
| C8orf68  | 0.811 | 0.31  |
| C8orf70  | 1.239 | 0.48  |
| C8orf72  | 4.368 | 0.04  |
| C8orf73  | 2.881 | 3.45  |
| C8orf74  | 1.036 | 0     |
| C8orf76  | 1.286 | 7.27  |
| C8orf77  | 2.644 | 0.19  |
| C8orf78  | 1.746 | 0     |
| C8orf79  | 2.39  | 0     |
| C8ORFK23 | 6.051 | 0     |
| C8ORFK29 | 1.596 | 0.95  |
| C8ORFK32 | 1.616 | 0     |
| C8ORFK36 | 1.746 | 0     |
| C9       | 2.069 | 0     |
| C9orf100 | 3.763 | 1.63  |
| C9orf102 | 3.261 | 1.16  |
| C9orf103 | 1.614 | 1.61  |
| C9orf105 | 1.448 | 16.17 |
| C9orf106 | 3.145 | 0.03  |
| C9orf11  | 1.023 | 0     |
| C9orf114 | 1.856 | 18.52 |
| C9orf116 | 0.781 | 0.11  |
| C9orf117 | 2.129 | 0.43  |
| C9orf119 | 0.981 | 13.39 |
| C9orf121 | 1.457 | 0.06  |

|          |       |        |
|----------|-------|--------|
| C9orf122 | 3.436 | 0.03   |
| C9orf123 | 2.487 | 14.9   |
| C9orf125 | 2.089 | 0.08   |
| C9orf126 | 1.968 | 1.07   |
| C9orf127 | 2.109 | 4.23   |
| C9orf128 | 1.722 | 0      |
| C9orf131 | 3.644 | 0      |
| C9orf135 | 0.851 | 0      |
| C9orf138 | 1.86  | 0.18   |
| C9orf139 | 3.815 | 2.08   |
| C9orf140 | 3.648 | 2.12   |
| C9orf142 | 0.812 | 27.8   |
| C9orf144 | 3.188 | 0      |
| C9orf150 | 2.69  | 0.06   |
| C9orf152 | 2.162 | 0      |
| C9orf153 | 0.409 | 0      |
| C9orf156 | 1.647 | 2.51   |
| C9orf16  | 0.613 | 103.33 |
| C9orf163 | 2.573 | 0.07   |
| C9orf164 | 1.837 | 1.84   |
| C9orf165 | 1.078 | 0.08   |
| C9orf166 | 0.501 | 0      |
| C9orf167 | 4.071 | 3.87   |
| C9orf18  | 0.699 | 0      |
| C9orf19  | 1.883 | 2.46   |
| C9orf21  | 1.225 | 0.2    |
| C9orf23  | 1.124 | 9.74   |
| C9orf24  | 1.641 | 0      |
| C9orf25  | 3.594 | 11.95  |
| C9orf27  | 0.772 | 0      |
| C9orf29  | 1.095 | 0      |
| C9orf3   | 2.82  | 1.7    |
| C9orf30  | 1.16  | 4      |
| C9orf32  | 1.002 | 12.02  |
| C9orf36  | 4.223 | 0      |
| C9orf37  | 1.709 | 10.1   |
| C9orf39  | 4.766 | 0.49   |
| C9orf4   | 1.133 | 0      |
| C9orf40  | 1.946 | 2.38   |
| C9orf41  | 2.193 | 2.69   |
| C9orf43  | 2.048 | 0.62   |
| C9orf45  | 5.98  | 6.19   |
| C9orf46  | 0.916 | 4.41   |
| C9orf47  | 4.829 | 0      |
| C9orf48  | 4.602 | 0.57   |
| C9orf5   | 7.992 | 3.87   |
| C9orf50  | 1.618 | 0      |
| C9orf52  | 2.428 | 0.03   |
| C9orf57  | 1.629 | 0      |
| C9orf58  | 3.65  | 19.13  |

|         |       |       |
|---------|-------|-------|
| C9orf6  | 2.124 | 4.91  |
| C9orf61 | 2.421 | 0     |
| C9orf64 | 2.067 | 0.57  |
| C9orf66 | 2.28  | 0.55  |
| C9orf68 | 2.437 | 0     |
| C9orf7  | 2.687 | 0.88  |
| C9orf71 | 1.245 | 0.27  |
| C9orf72 | 4.435 | 0.09  |
| C9orf75 | 2.109 | 6.07  |
| C9orf77 | 3.468 | 22.03 |
| C9orf78 | 3.038 | 21.91 |
| C9orf79 | 4.445 | 0     |
| C9orf80 | 1.524 | 2.38  |
| C9orf82 | 2.714 | 1.18  |
| C9orf84 | 5.269 | 0.09  |
| C9orf85 | 1.578 | 5.44  |
| C9orf86 | 3.13  | 36.04 |
| C9orf89 | 0.906 | 50.77 |
| C9orf9  | 0.719 | 8.32  |
| C9orf90 | 3.182 | 3.47  |
| C9orf91 | 3.684 | 9.26  |
| C9orf93 | 4.359 | 0.31  |
| C9orf94 | 3.893 | 2.46  |
| C9orf95 | 1.158 | 1.9   |
| C9orf96 | 2.779 | 0.06  |
| C9orf97 | 4.062 | 2.61  |
| C9orf98 | 2.106 | 0.36  |
| CA1     | 1.264 | 48.45 |
| CA10    | 3.189 | 0     |
| CA11    | 1.653 | 9.93  |
| CA12    | 3.975 | 0     |
| CA13    | 3.564 | 0.16  |
| CA14    | 1.742 | 0.05  |
| CA2     | 1.551 | 10.27 |
| CA3     | 2.356 | 0.47  |
| CA4     | 1.105 | 0.15  |
| CA5A    | 1.084 | 0.08  |
| CA5B    | 2.255 | 1.72  |
| CA6     | 1.631 | 10.84 |
| CA7     | 2.052 | 1.27  |
| CA8     | 2.278 | 0.19  |
| CA9     | 1.552 | 0.16  |
| CAB39   | 3.718 | 15.11 |
| CAB39L  | 2.702 | 0.75  |
| CABC1   | 2.871 | 12.64 |
| CABIN1  | 7.222 | 13.78 |
| CABLES1 | 2.471 | 0.58  |
| CABLES2 | 3.777 | 6.71  |
| CABP1   | 1.899 | 0     |
| CABP2   | 0.925 | 0     |

|          |        |       |
|----------|--------|-------|
| CABP4    | 1.466  | 0.12  |
| CABP5    | 1.251  | 0     |
| CABP7    | 2.982  | 5.03  |
| CABYR    | 3.262  | 0.85  |
| CABYRP   | 1.411  | 0     |
| CACHD1   | 5.547  | 0.23  |
| CACNA1A  | 8.563  | 0.12  |
| CACNA1B  | 7.342  | 0     |
| CACNA1C  | 8.425  | 0.05  |
| CACNA1D  | 7.192  | 0     |
| CACNA1E  | 9.724  | 0.02  |
| CACNA1F  | 6.07   | 0.42  |
| CACNA1G  | 9.542  | 0     |
| CACNA1H  | 8.088  | 0.06  |
| CACNA1I  | 10.002 | 0.09  |
| CACNA1S  | 6.166  | 0     |
| CACNA2D1 | 7.644  | 0     |
| CACNA2D2 | 5.536  | 0.06  |
| CACNA2D3 | 3.675  | 0     |
| CACNA2D4 | 7.222  | 0.38  |
| CACNB1   | 4.242  | 1.04  |
| CACNB2   | 4.44   | 0.21  |
| CACNB3   | 2.698  | 12.61 |
| CACNB4   | 3.416  | 0.13  |
| CACNG1   | 1.266  | 0     |
| CACNG2   | 1.548  | 0     |
| CACNG3   | 2.701  | 0     |
| CACNG4   | 3.397  | 0.08  |
| CACNG5   | 1.295  | 0.71  |
| CACNG6   | 1.85   | 0     |
| CACNG7   | 1.564  | 0     |
| CACNG8   | 1.417  | 0.59  |
| CACYBP   | 3.535  | 10.41 |
| CAD      | 7.108  | 13.3  |
| CADM1    | 3.509  | 0     |
| CADM2    | 3.332  | 0     |
| CADM3    | 2.525  | 0.03  |
| CADM4    | 2.176  | 0.62  |
| CADPS    | 5.627  | 0     |
| CADPS2   | 9.396  | 0.02  |
| CAGE1    | 4.271  | 0.04  |
| CALB1    | 2.531  | 0     |
| CALB2    | 2.263  | 0     |
| CALCA    | 1.454  | 0     |
| CALCB    | 1.031  | 0     |
| CALCOCO1 | 3.157  | 27.64 |
| CALCOCO2 | 3.282  | 24.38 |
| CALCP    | 0.501  | 0     |
| CALCR    | 6.94   | 0.54  |
| CALCRL   | 3.008  | 0     |



|           |        |        |
|-----------|--------|--------|
| CALD1     | 11.776 | 3.37   |
| CALM1     | 4.66   | 125.16 |
| CALM1P1   | 0.108  | 131.82 |
| CALM1P2   | 0.768  | 0.22   |
| CALM2     | 1.128  | 180.57 |
| CALM2P2   | 0.445  | 62.09  |
| CALM2P3   | 3.213  | 1.57   |
| CALM3     | 2.259  | 210.24 |
| CALML3    | 1.302  | 0      |
| CALML4    | 5.321  | 9.1    |
| CALML5    | 0.851  | 0      |
| CALML6    | 1.101  | 0.23   |
| CALN1     | 12.227 | 0.05   |
| CALR      | 1.901  | 724.09 |
| CALR3     | 1.273  | 0      |
| CALU      | 6.634  | 7.37   |
| CAMK1     | 1.483  | 29.88  |
| CAMK1D    | 5.237  | 9.71   |
| CAMK1G    | 2.47   | 0      |
| CAMK2A    | 4.836  | 0      |
| CAMK2B    | 4.992  | 0      |
| CAMK2D    | 6.756  | 2.68   |
| CAMK2G    | 4.461  | 6.25   |
| CAMK2N1   | 0.847  | 0.59   |
| CAMK2N2   | 1.36   | 0.06   |
| CAMK4     | 2.107  | 0.04   |
| CAMKK1    | 4.776  | 1.06   |
| CAMKK2    | 9.388  | 9.19   |
| CAMKV     | 3.028  | 0.03   |
| CAMLG     | 2.203  | 7.88   |
| CAMP      | 0.714  | 10.97  |
| CAMSAP1   | 6.06   | 3.34   |
| CAMSAP1L1 | 7.352  | 1.25   |
| CAMTA1    | 8.984  | 2.09   |
| CAMTA2    | 4.475  | 10.88  |
| CAND1     | 5.354  | 9.69   |
| CAND2     | 5.355  | 0.76   |
| CANT1     | 3.473  | 16.72  |
| CANX      | 5.074  | 88.6   |
| CAP1      | 2.602  | 92.56  |
| CAP2      | 3.027  | 0      |
| CAP2P1    | 2.014  | 0      |
| CAPG      | 1.442  | 22.84  |
| CAPN1     | 3.007  | 68.19  |
| CAPN10    | 3.657  | 8.24   |
| CAPN11    | 2.728  | 5.44   |
| CAPN12    | 3.129  | 2.15   |
| CAPN13    | 2.682  | 0.03   |
| CAPN14    | 3.787  | 0.89   |
| CAPN2     | 3.406  | 11.6   |

|          |        |        |
|----------|--------|--------|
| CAPN3    | 5.988  | 5.94   |
| CAPN5    | 4.393  | 3.19   |
| CAPN6    | 3.568  | 0      |
| CAPN7    | 4.368  | 3.84   |
| CAPN9    | 2.851  | 0      |
| CAPNS1   | 1.49   | 324.79 |
| CAPNS2   | 1.009  | 0      |
| CAPS     | 1.373  | 4.78   |
| CAPS2    | 3.831  | 0.24   |
| CAPSL    | 0.934  | 0      |
| CAPZA1   | 2.74   | 31.82  |
| CAPZA1P  | 0.855  | 9.36   |
| CAPZA2   | 4.712  | 5.06   |
| CAPZA3   | 1.078  | 0      |
| CAPZB    | 1.63   | 133.9  |
| CARD10   | 3.899  | 0.04   |
| CARD11   | 8.516  | 2.69   |
| CARD14   | 4.734  | 0.05   |
| CARD6    | 4.097  | 4.28   |
| CARD8    | 5.393  | 18.49  |
| CARD9    | 2.098  | 0.08   |
| CARHSP1  | 1.642  | 52.12  |
| CARKL    | 4.433  | 7.3    |
| CARM1    | 2.968  | 20.32  |
| CARS     | 3.494  | 8.34   |
| CARS2    | 1.843  | 19.75  |
| CART1    | 1.442  | 0      |
| CARTPT   | 1.816  | 0      |
| CASC1    | 2.55   | 0      |
| CASC2    | 3.816  | 0      |
| CASC3    | 4.106  | 21.66  |
| CASC4    | 3.961  | 6.91   |
| CASC5    | 8.693  | 1.35   |
| CASD1    | 7.634  | 0.92   |
| CASK     | 3.123  | 0.73   |
| CASKIN1  | 5.695  | 0.78   |
| CASKIN2  | 4.978  | 6.87   |
| CASKP    | 18.328 | 0      |
| CASP1    | 1.576  | 50.51  |
| CASP10   | 4.222  | 14.19  |
| CASP12   | 13.287 | 0.06   |
| CASP14   | 0.777  | 0      |
| CASP2    | 14.014 | 3.44   |
| CASP3    | 2.673  | 7.6    |
| CASP4    | 1.982  | 52.96  |
| CASP5    | 1.399  | 0.18   |
| CASP6    | 1.661  | 2.74   |
| CASP7    | 4.681  | 5.04   |
| CASP8    | 3.744  | 6.35   |
| CASP8AP2 | 6.749  | 2.08   |

|          |        |       |
|----------|--------|-------|
| CASP9    | 1.993  | 4.48  |
| CASQ1    | 1.878  | 0.04  |
| CASQ2    | 2.527  | 0     |
| CASR     | 4.913  | 0     |
| CAST     | 5.314  | 20.86 |
| CASZ1    | 4.094  | 1.4   |
| CAT      | 2.294  | 99.51 |
| CATSPER1 | 2.615  | 0     |
| CATSPER2 | 3.546  | 0.9   |
| CATSPER3 | 1.338  | 0.37  |
| CATSPER4 | 1.419  | 0     |
| CAV1     | 5.408  | 0.06  |
| CAV2     | 11.743 | 0.01  |
| CAV3     | 2.223  | 0     |
| CBARA1   | 2.363  | 17.29 |
| CBFA2T2  | 8.061  | 2.94  |
| CBFA2T3  | 4.599  | 17.62 |
| CBFB     | 5.581  | 10.94 |
| CBL      | 11.227 | 5.99  |
| CBLB     | 3.976  | 4.78  |
| CBLC     | 1.557  | 0.32  |
| CBLL1    | 4.479  | 9.89  |
| CBLN1    | 1.517  | 0     |
| CBLN2    | 2.733  | 0     |
| CBLN3    | 2.336  | 3.57  |
| CBLN4    | 2.508  | 0     |
| CBR1     | 1.245  | 14.14 |
| CBR3     | 1.112  | 1.14  |
| CBR4     | 3.456  | 2.07  |
| CBS      | 2.516  | 0.1   |
| CBWD1    | 1.679  | 1.41  |
| CBWD2    | 1.677  | 2.26  |
| CBWD3    | 1.677  | 0     |
| CBWD5    | 1.143  | 0.66  |
| CBX1     | 2.216  | 0.76  |
| CBX2     | 5.016  | 5.56  |
| CBX3     | 3.864  | 14.87 |
| CBX4     | 2.649  | 25.47 |
| CBX5     | 3.598  | 25.89 |
| CBX6     | 5.979  | 25.84 |
| CBX7     | 3.964  | 1.83  |
| CBX8     | 1.521  | 3.76  |
| CBY1     | 1.271  | 6.03  |
| CC2D1A   | 3.686  | 8.55  |
| CC2D1B   | 5.639  | 5     |
| CCAR1    | 3.858  | 12.53 |
| CCBE1    | 3.233  | 0.03  |
| CCBL1    | 2.106  | 3.4   |
| CCBL2    | 2.084  | 4.97  |
| CCBP2    | 2.948  | 0     |

|          |       |       |
|----------|-------|-------|
| CCDC100  | 2.341 | 4.25  |
| CCDC101  | 1.141 | 14.76 |
| CCDC102A | 2.429 | 4.27  |
| CCDC102B | 2     | 0.13  |
| CCDC103  | 1.256 | 0.14  |
| CCDC104  | 1.372 | 4.3   |
| CCDC105  | 1.732 | 0     |
| CCDC106  | 1.993 | 8.71  |
| CCDC107  | 1.177 | 30.85 |
| CCDC108  | 8.122 | 0     |
| CCDC109A | 2.949 | 6.48  |
| CCDC109B | 1.212 | 11.68 |
| CCDC11   | 1.824 | 0.14  |
| CCDC110  | 2.851 | 0     |
| CCDC111  | 2.079 | 2.47  |
| CCDC112  | 3.03  | 0.11  |
| CCDC113  | 5.249 | 0.13  |
| CCDC114  | 1.907 | 0.4   |
| CCDC115  | 1.644 | 20.6  |
| CCDC116  | 2.192 | 0     |
| CCDC117  | 3.935 | 10.14 |
| CCDC12   | 0.843 | 49.97 |
| CCDC120  | 3.972 | 2.61  |
| CCDC121  | 2.342 | 0.8   |
| CCDC122  | 3.461 | 0.85  |
| CCDC123  | 3.132 | 3.55  |
| CCDC124  | 1.038 | 50.32 |
| CCDC125  | 7.233 | 1.29  |
| CCDC126  | 4.946 | 0.37  |
| CCDC127  | 1.42  | 5.87  |
| CCDC128  | 3.137 | 5.21  |
| CCDC129  | 9.088 | 0     |
| CCDC13   | 2.827 | 0     |
| CCDC130  | 1.632 | 14.35 |
| CCDC131  | 7.158 | 4.16  |
| CCDC132  | 7.754 | 0.93  |
| CCDC134  | 1.275 | 1.78  |
| CCDC135  | 2.898 | 0.49  |
| CCDC14   | 7.914 | 3.59  |
| CCDC15   | 2.659 | 0.54  |
| CCDC16   | 1.63  | 8.52  |
| CCDC17   | 1.873 | 0.99  |
| CCDC18   | 4.658 | 1.19  |
| CCDC19   | 1.795 | 0.05  |
| CCDC21   | 3.935 | 5.01  |
| CCDC22   | 2.715 | 9.25  |
| CCDC23   | 0.652 | 22.09 |
| CCDC24   | 1.463 | 5.58  |
| CCDC25   | 3.586 | 6.7   |
| CCDC26   | 2.234 | 6.6   |

|         |       |        |
|---------|-------|--------|
| CCDC27  | 2.177 | 0      |
| CCDC28A | 1.496 | 9.41   |
| CCDC28B | 1.415 | 7.98   |
| CCDC3   | 2.738 | 1.05   |
| CCDC32  | 1.705 | 16.6   |
| CCDC33  | 2.093 | 0      |
| CCDC34  | 3.051 | 5.41   |
| CCDC35  | 4.862 | 0.38   |
| CCDC36  | 2.613 | 0      |
| CCDC37  | 2.086 | 0      |
| CCDC38  | 1.953 | 0      |
| CCDC4   | 3.33  | 0      |
| CCDC40  | 6.094 | 0.22   |
| CCDC41  | 2.936 | 2.67   |
| CCDC42  | 1.374 | 0.25   |
| CCDC43  | 2.082 | 7.85   |
| CCDC44  | 1.457 | 9.48   |
| CCDC45  | 2.691 | 6.01   |
| CCDC46  | 3.85  | 0.15   |
| CCDC47  | 3.267 | 12.94  |
| CCDC48  | 1.963 | 0      |
| CCDC49  | 2.33  | 8.97   |
| CCDC5   | 1.098 | 11.97  |
| CCDC50  | 2.454 | 0      |
| CCDC51  | 1.506 | 5.26   |
| CCDC52  | 5.412 | 1.74   |
| CCDC53  | 0.857 | 11.01  |
| CCDC54  | 1.294 | 0      |
| CCDC55  | 4.449 | 6.44   |
| CCDC56  | 0.753 | 46.98  |
| CCDC57  | 2.997 | 5.4    |
| CCDC58  | 0.718 | 6.1    |
| CCDC59  | 1.055 | 10.54  |
| CCDC6   | 5.704 | 5.41   |
| CCDC60  | 2.45  | 0      |
| CCDC62  | 3.368 | 0.08   |
| CCDC63  | 1.945 | 0      |
| CCDC64  | 1.664 | 0.05   |
| CCDC65  | 1.777 | 0.24   |
| CCDC66  | 3.098 | 2.26   |
| CCDC67  | 1.656 | 0      |
| CCDC68  | 3.977 | 0      |
| CCDC69  | 3.399 | 22.75  |
| CCDC7   | 2.445 | 0.1    |
| CCDC70  | 1.125 | 0      |
| CCDC71  | 1.781 | 18.21  |
| CCDC72  | 0.463 | 101.52 |
| CCDC73  | 4.015 | 0.29   |
| CCDC74A | 1.457 | 0.17   |
| CCDC74B | 1.471 | 0      |

|             |       |        |
|-------------|-------|--------|
| CCDC75      | 1.166 | 4.19   |
| CCDC76      | 3.129 | 2.93   |
| CCDC77      | 2.258 | 2.84   |
| CCDC78      | 4.796 | 0.54   |
| CCDC79      | 1.846 | 0      |
| CCDC8       | 2.757 | 0.09   |
| CCDC80      | 4.732 | 0.14   |
| CCDC81      | 2.51  | 0.2    |
| CCDC82      | 2.695 | 4.15   |
| CCDC83      | 2.345 | 0      |
| CCDC84      | 1.202 | 5.6    |
| CCDC85A     | 3.983 | 0      |
| CCDC85B     | 1.232 | 58.94  |
| CCDC86      | 1.893 | 22.03  |
| CCDC87      | 2.884 | 0.03   |
| CCDC88      | 4.915 | 3.24   |
| CCDC89      | 2.428 | 0      |
| CCDC9       | 2.017 | 5.89   |
| CCDC90A     | 1.229 | 8.09   |
| CCDC90B     | 1.578 | 13.82  |
| CCDC91      | 2.335 | 4.11   |
| CCDC92      | 1.793 | 9.96   |
| CCDC93      | 6.794 | 4.23   |
| CCDC94      | 1.415 | 14.11  |
| CCDC95      | 1.185 | 34.76  |
| CCDC96      | 1.769 | 0.81   |
| CCDC97      | 3.322 | 28.96  |
| CCDC98      | 2.718 | 4.43   |
| CCDC99      | 2.529 | 4.33   |
| CCHCR1      | 8.796 | 0.17   |
| CCIN        | 1.93  | 0      |
| CCK         | 0.829 | 0      |
| CCKAR       | 1.682 | 0      |
| CCKBR       | 2.12  | 0      |
| CCL1        | 0.542 | 0      |
| CCL11       | 0.925 | 0      |
| CCL13       | 0.851 | 0.2    |
| CCL14       | 0.481 | 7.36   |
| CCL14-CCL15 | 0.1   | 0      |
| CCL15       | 0.962 | 0      |
| CCL16       | 1.497 | 0      |
| CCL17       | 0.615 | 961.66 |
| CCL18       | 0.77  | 0.11   |
| CCL19       | 0.684 | 0.12   |
| CCL2        | 0.749 | 25.53  |
| CCL20       | 0.8   | 0      |
| CCL21       | 0.878 | 0      |
| CCL22       | 2.894 | 0.03   |
| CCL23       | 0.74  | 0      |
| CCL24       | 0.72  | 0      |

|          |       |        |
|----------|-------|--------|
| CCL25    | 0.891 | 0      |
| CCL26    | 1.124 | 0      |
| CCL27    | 0.446 | 0      |
| CCL28    | 0.816 | 3.31   |
| CCL3     | 0.775 | 0.98   |
| CCL3L1   | 0.783 | 0      |
| CCL3L2   | 1.244 | 0      |
| CCL3L3   | 0.775 | 0      |
| CCL4     | 0.667 | 0.38   |
| CCL4L1   | 0.659 | 0      |
| CCL4L2   | 0.379 | 0      |
| CCL5     | 1.23  | 6.65   |
| CCL7     | 0.805 | 0      |
| CCL8     | 1.25  | 0      |
| CCM2     | 4.612 | 10.23  |
| CCNA1    | 1.73  | 0.34   |
| CCNA2    | 1.676 | 10.55  |
| CCNB1    | 2.093 | 19.4   |
| CCNB1IP1 | 2.963 | 21.29  |
| CCNB2    | 1.513 | 18.21  |
| CCNB3    | 4.513 | 0      |
| CCNC     | 2.474 | 7.08   |
| CCND1    | 4.289 | 2.97   |
| CCND2    | 6.48  | 91.18  |
| CCND2P   | 0.953 | 1.33   |
| CCND3    | 2.051 | 350.91 |
| CCNDBP1  | 1.979 | 15.96  |
| CCNE1    | 2.074 | 1.18   |
| CCNE2    | 2.837 | 0.71   |
| CCNF     | 4.238 | 8.17   |
| CCNG1    | 2.602 | 23.34  |
| CCNG2    | 2.037 | 8.35   |
| CCNH     | 1.378 | 9.36   |
| CCNI     | 2.604 | 165.85 |
| CCNJ     | 4.11  | 1.13   |
| CCNJL    | 3.274 | 1.28   |
| CCNK     | 2.033 | 26.31  |
| CCNL1    | 2.625 | 14.12  |
| CCNL2    | 7.216 | 6.68   |
| CCNT1    | 2.959 | 3.9    |
| CCNT2    | 8.281 | 2.38   |
| CCNU     | 2.973 | 0.11   |
| CCNY     | 3.42  | 19.24  |
| CCNYL1   | 1.952 | 1.72   |
| CCNYL2   | 1.999 | 0      |
| CCNYL3   | 2.541 | 0      |
| CCPG1    | 6.822 | 2.43   |
| CCR1     | 2.676 | 2.14   |
| CCR10    | 1.229 | 0.2    |
| CCR2     | 4.169 | 0      |

|         |       |        |
|---------|-------|--------|
| CCR3    | 1.945 | 0      |
| CCR4    | 1.657 | 0      |
| CCR5    | 3.655 | 0.35   |
| CCR6    | 3.632 | 19.57  |
| CCR7    | 2.173 | 1.94   |
| CCR8    | 2.371 | 0      |
| CCR9    | 5.006 | 0      |
| CCRK    | 2.521 | 0      |
| CCRL1   | 2.485 | 0.07   |
| CCRL1P  | 1.832 | 0.05   |
| CCRL2   | 1.729 | 1.22   |
| CCRN4L  | 1.954 | 1.21   |
| CCS     | 1.032 | 28.65  |
| CCT2    | 1.954 | 59.19  |
| CCT3    | 2.211 | 146.49 |
| CCT4    | 2.602 | 62.68  |
| CCT5    | 3.403 | 41.93  |
| CCT6A   | 5.328 | 19.3   |
| CCT6B   | 1.816 | 0.14   |
| CCT7    | 1.892 | 135.66 |
| CCT8    | 1.895 | 86.59  |
| CD109   | 5.882 | 2.38   |
| CD14    | 1.867 | 1.31   |
| CD151   | 1.62  | 2.18   |
| CD160   | 1.559 | 0.32   |
| CD163   | 4.105 | 0.64   |
| CD163L1 | 4.583 | 0.05   |
| CD164   | 2.993 | 77.46  |
| CD164L2 | 1.457 | 0.06   |
| CD177   | 2.426 | 2.33   |
| CD180   | 2.698 | 0.88   |
| CD19    | 1.95  | 272.83 |
| CD1A    | 2.072 | 0.45   |
| CD1B    | 1.294 | 0      |
| CD1C    | 1.194 | 2.12   |
| CD1D    | 2.253 | 0.41   |
| CD1E    | 0.972 | 0      |
| CD2     | 1.515 | 1      |
| CD200   | 2.291 | 21.4   |
| CD200R1 | 2.862 | 0      |
| CD200R2 | 1.296 | 0      |
| CD207   | 1.868 | 0      |
| CD209   | 4.267 | 3.35   |
| CD22    | 3.251 | 23.97  |
| CD226   | 2.565 | 0.1    |
| CD24    | 2.18  | 363.41 |
| CD244   | 2.463 | 0.27   |
| CD247   | 1.866 | 2.03   |
| CD248   | 2.558 | 139.82 |
| CD27    | 1.481 | 11.43  |



|         |       |        |
|---------|-------|--------|
| CD274   | 1.54  | 0.16   |
| CD276   | 3.401 | 0.03   |
| CD28    | 3.806 | 0.14   |
| CD2AP   | 4.644 | 2.61   |
| CD2BP2  | 1.285 | 30.09  |
| CD300A  | 1.889 | 8.29   |
| CD300C  | 1.517 | 0.11   |
| CD300E  | 0.739 | 0      |
| CD300LB | 2.286 | 0.03   |
| CD300LF | 1.759 | 2.69   |
| CD300LG | 2.756 | 0.03   |
| CD302   | 3.741 | 1.99   |
| CD320   | 1.25  | 21.97  |
| CD33    | 1.436 | 2.35   |
| CD33L3  | 1.505 | 1.62   |
| CD34    | 4.197 | 361.43 |
| CD36    | 5.562 | 1.47   |
| CD37    | 1.938 | 90.41  |
| CD38    | 1.493 | 0.23   |
| CD3D    | 1.53  | 0.99   |
| CD3E    | 1.356 | 3.04   |
| CD3EAP  | 3.286 | 10.26  |
| CD3G    | 0.823 | 0.41   |
| CD4     | 3.103 | 1.9    |
| CD40    | 2.509 | 16.21  |
| CD40LG  | 1.833 | 0.09   |
| CD44    | 9.034 | 8.32   |
| CD46    | 7.388 | 4.59   |
| CD47    | 9.745 | 9.62   |
| CD48    | 1.07  | 12.13  |
| CD5     | 3.121 | 0.3    |
| CD52    | 0.505 | 973.79 |
| CD53    | 1.721 | 209.39 |
| CD55    | 2.284 | 6.86   |
| CD58    | 1.04  | 4.78   |
| CD59    | 7.809 | 11.62  |
| CD5L    | 2.152 | 1.25   |
| CD6     | 3.23  | 0.63   |
| CD63    | 1.095 | 109.4  |
| CD68    | 2.483 | 9.23   |
| CD69    | 1.676 | 40.91  |
| CD7     | 1.283 | 1.11   |
| CD70    | 0.913 | 8.12   |
| CD72    | 1.532 | 28.31  |
| CD74    | 2.2   | 8588.4 |
| CD79A   | 1.444 | 278.72 |
| CD79B   | 1.315 | 303.12 |
| CD80    | 2.725 | 0.09   |
| CD81    | 1.497 | 267.33 |
| CD82    | 2.279 | 130.73 |

|          |        |        |
|----------|--------|--------|
| CD83     | 2.604  | 1.94   |
| CD84     | 3.276  | 0.59   |
| CD86     | 2.901  | 0.2    |
| CD8A     | 2.202  | 1.45   |
| CD8B     | 3.054  | 0.33   |
| CD8BP    | 20.283 | 0.02   |
| CD9      | 1.231  | 508.7  |
| CD93     | 6.701  | 5.61   |
| CD96     | 4.481  | 0.7    |
| CD97     | 3.233  | 210.76 |
| CD99     | 1.237  | 681.93 |
| CD99L2   | 3.605  | 6.4    |
| CDA      | 0.96   | 1.76   |
| CDADC1   | 3.346  | 1.89   |
| CDAN1    | 4.73   | 5.61   |
| CDC10P   | 1.304  | 0.32   |
| CDC123   | 1.542  | 51.73  |
| CDC14A   | 5.221  | 0.42   |
| CDC14B   | 5.792  | 0.58   |
| CDC14C   | 4.284  | 0      |
| CDC16    | 2.196  | 13.58  |
| CDC2     | 1.227  | 11.33  |
| CDC20    | 1.669  | 45.88  |
| CDC20B   | 2.946  | 0      |
| CDC20P   | 1.621  | 11.12  |
| CDC23    | 3.142  | 10.86  |
| CDC25A   | 3.706  | 2.23   |
| CDC25B   | 3.761  | 19.26  |
| CDC25C   | 2.115  | 1.79   |
| CDC26    | 0.872  | 23.96  |
| CDC27    | 3.277  | 6.02   |
| CDC2L1   | 3.418  | 8.55   |
| CDC2L2   | 3.526  | 7.98   |
| CDC2L5   | 11.037 | 3.74   |
| CDC2L6   | 6.139  | 4.71   |
| CDC34    | 1.445  | 22.85  |
| CDC37    | 1.671  | 150.57 |
| CDC37L1  | 1.706  | 1.78   |
| CDC40    | 3.853  | 5.4    |
| CDC42    | 3.155  | 35.24  |
| CDC42BPA | 8.019  | 0.99   |
| CDC42BPB | 6.757  | 4.54   |
| CDC42BPG | 4.68   | 0.14   |
| CDC42EP1 | 2.23   | 0.26   |
| CDC42EP2 | 1.981  | 1.02   |
| CDC42EP3 | 4.922  | 9.32   |
| CDC42EP4 | 3.101  | 2.72   |
| CDC42EP5 | 0.875  | 5.58   |
| CDC42P1  | 0.548  | 0      |
| CDC42SE1 | 3.183  | 37.31  |

|          |        |       |
|----------|--------|-------|
| CDC42SE2 | 3.657  | 13.86 |
| CDC45L   | 1.91   | 5.12  |
| CDC5L    | 3      | 11.4  |
| CDC6     | 3.053  | 3.97  |
| CDC7     | 3.172  | 1.99  |
| CDC73    | 2.98   | 4.89  |
| CDCA2    | 3.722  | 1.72  |
| CDCA3    | 1.119  | 9.79  |
| CDCA4    | 2.9    | 9.09  |
| CDCA5    | 2.485  | 11.93 |
| CDCA7    | 2.81   | 10.76 |
| CDCA7L   | 6.071  | 9.63  |
| CDCA8    | 2.303  | 14.15 |
| CDCP1    | 6.61   | 0     |
| CDCP2    | 2.723  | 0     |
| CDGAP    | 6.32   | 1.16  |
| CDH1     | 4.815  | 0.1   |
| CDH10    | 3.261  | 0     |
| CDH11    | 3.648  | 0.09  |
| CDH12    | 4.164  | 0     |
| CDH12P   | 0.602  | 0     |
| CDH13    | 3.828  | 0     |
| CDH15    | 2.859  | 0     |
| CDH16    | 2.833  | 0     |
| CDH17    | 3.697  | 0     |
| CDH18    | 2.944  | 0     |
| CDH19    | 3.185  | 0     |
| CDH2     | 4.108  | 0     |
| CDH20    | 2.855  | 0     |
| CDH22    | 3.657  | 0     |
| CDH23    | 11.395 | 0.2   |
| CDH24    | 2.873  | 0.38  |
| CDH26    | 3.397  | 0.05  |
| CDH3     | 3.636  | 0     |
| CDH4     | 3.062  | 0     |
| CDH5     | 4.09   | 10.56 |
| CDH6     | 4.521  | 0.03  |
| CDH7     | 3.002  | 0     |
| CDH8     | 2.929  | 0     |
| CDH9     | 3.075  | 0     |
| CDIPT    | 2.079  | 42.46 |
| CDK10    | 3.97   | 12.9  |
| CDK2     | 2.29   | 14.68 |
| CDK2AP1  | 1.615  | 26.13 |
| CDK2AP2  | 1.378  | 77.51 |
| CDK3     | 1.601  | 6.31  |
| CDK4     | 1.443  | 62.52 |
| CDK5     | 2.274  | 4.85  |
| CDK5R1   | 3.854  | 0.85  |
| CDK5R2   | 2.48   | 0     |

|          |        |       |
|----------|--------|-------|
| CDK5RAP1 | 2.268  | 8.21  |
| CDK5RAP2 | 6.23   | 7.89  |
| CDK5RAP3 | 3.667  | 26.44 |
| CDK6     | 24.165 | 8.93  |
| CDK7     | 2.834  | 1.66  |
| CDK7PS   | 1.14   | 1.26  |
| CDK8     | 1.769  | 3.62  |
| CDK9     | 3.522  | 91.37 |
| CDKAL1   | 2.408  | 3.08  |
| CDKL1    | 1.177  | 2.29  |
| CDKL2    | 1.921  | 0     |
| CDKL3    | 1.501  | 0.84  |
| CDKL4    | 1.567  | 0     |
| CDKL5    | 3.518  | 0.29  |
| CDKN1A   | 2.351  | 68.9  |
| CDKN1B   | 2.404  | 22.36 |
| CDKN1C   | 1.493  | 0.17  |
| CDKN2A   | 2.735  | 14.45 |
| CDKN2AIP | 2.374  | 7.21  |
| CDKN2B   | 7.485  | 1.99  |
| CDKN2C   | 2.853  | 21.08 |
| CDKN2D   | 1.447  | 14.38 |
| CDKN3    | 0.836  | 10.98 |
| CDO1     | 1.614  | 0.05  |
| CDON     | 8.044  | 0.42  |
| CDR1     | 1.299  | 0.2   |
| CDR2     | 2.702  | 3.71  |
| CDR2L    | 3.529  | 0.19  |
| CDRT1    | 1.282  | 0.66  |
| CDRT15   | 0.567  | 0.3   |
| CDRT4    | 2.489  | 0.17  |
| CDS1     | 2.4    | 0     |
| CDS2     | 7.843  | 34.04 |
| CDSN     | 7.641  | 0.03  |
| CDT1     | 2.675  | 17.76 |
| CDV3     | 3.592  | 37.66 |
| CDX1     | 1.699  | 0     |
| CDX2     | 2.09   | 0     |
| CDX4     | 0.855  | 0     |
| CDY1     | 4.262  | 0     |
| CDY10P   | 2.868  | 0     |
| CDY11P   | 3.029  | 0     |
| CDY12P   | 1.209  | 0     |
| CDY13P   | 1.209  | 0     |
| CDY14P   | 1.208  | 0     |
| CDY15P   | 3.242  | 0     |
| CDY16P   | 1.331  | 0     |
| CDY17P   | 2.137  | 0     |
| CDY18P   | 3.448  | 0     |
| CDY19P   | 3.448  | 0     |

|           |       |       |
|-----------|-------|-------|
| CDY1B     | 4.262 | 0     |
| CDY20P    | 2.137 | 0     |
| CDY21P    | 1.331 | 0     |
| CDY22P    | 3.242 | 0     |
| CDY23P    | 1.208 | 0     |
| CDY2A     | 1.96  | 0     |
| CDY2B     | 1.96  | 0     |
| CDY3P     | 2.805 | 0     |
| CDY4P     | 2.73  | 0     |
| CDY5P     | 1.999 | 0     |
| CDY6P     | 2.137 | 0     |
| CDY7P     | 2.297 | 0     |
| CDY8P     | 2.137 | 0     |
| CDY9P     | 1.999 | 0     |
| CDYL      | 4.391 | 2.92  |
| CDYL2     | 2.233 | 0     |
| CEACAM1   | 5.452 | 1.66  |
| CEACAM16  | 1.797 | 0     |
| CEACAM19  | 1.863 | 0     |
| CEACAM20  | 2.12  | 0     |
| CEACAM21  | 2.028 | 29.99 |
| CEACAM3   | 1.022 | 0.25  |
| CEACAM4   | 1.205 | 0.21  |
| CEACAM5   | 2.972 | 0.11  |
| CEACAM6   | 2.528 | 16.26 |
| CEACAM7   | 2.291 | 0     |
| CEACAM8   | 2.271 | 2.34  |
| CEACAMP10 | 0.912 | 0     |
| CEACAMP11 | 0.911 | 0     |
| CEACAMP2  | 0.289 | 0     |
| CEACAMP3  | 0.248 | 0     |
| CEACAMP4  | 0.297 | 0     |
| CEACAMP5  | 8.866 | 0     |
| CEACAMP6  | 0.911 | 0     |
| CEACAMP7  | 0.913 | 0     |
| CEACAMP8  | 0.901 | 0     |
| CEACAMP9  | 0.912 | 0     |
| CEBPA     | 2.385 | 14.06 |
| CEBPB     | 1.837 | 10.77 |
| CEBPD     | 1.295 | 1.23  |
| CEBPE     | 1.201 | 2.67  |
| CEBPG     | 3.736 | 3.93  |
| CEBPZ     | 3.444 | 10.25 |
| CECR1     | 6.215 | 1.86  |
| CECR2     | 4.823 | 4.32  |
| CECR5     | 1.88  | 18.19 |
| CECR6     | 4.954 | 1.09  |
| CECR8     | 1.185 | 0     |
| CEECAM1   | 2.327 | 3.7   |
| CEL       | 2.35  | 2.44  |

|         |        |       |
|---------|--------|-------|
| CELP    | 4.818  | 0.3   |
| CELSR1  | 11.389 | 0.13  |
| CELSR2  | 10.534 | 2.22  |
| CELSR3  | 11.962 | 0.06  |
| CEND1   | 1.643  | 0.1   |
| CENPA   | 1.389  | 6.19  |
| CENPB   | 2.84   | 56    |
| CENPC1  | 3.349  | 3.62  |
| CENPC2  | 3.138  | 1.1   |
| CENPE   | 8.612  | 1.44  |
| CENPF   | 10.296 | 8.57  |
| CENPH   | 1.389  | 4.86  |
| CENPI   | 2.563  | 0.56  |
| CENPJ   | 4.345  | 2.6   |
| CENPK   | 1.72   | 1.67  |
| CENPL   | 1.901  | 2.66  |
| CENPM   | 1.39   | 9.76  |
| CENPN   | 1.387  | 3.15  |
| CENPO   | 1.625  | 6.12  |
| CENPP   | 3.422  | 1.06  |
| CENPQ   | 1.728  | 1.71  |
| CENPT   | 2.133  | 18.32 |
| CENTA1  | 4.592  | 4.61  |
| CENTA2  | 2.749  | 1.22  |
| CENTB1  | 2.483  | 28.32 |
| CENTB2  | 7.091  | 4.69  |
| CENTB5  | 2.624  | 5.36  |
| CENTD1  | 7.771  | 2.63  |
| CENTD2  | 6.216  | 18.79 |
| CENTD3  | 5.262  | 0.29  |
| CENTG1  | 3.938  | 5.6   |
| CENTG2  | 5.446  | 7.27  |
| CENTG3  | 6.248  | 9.93  |
| CEP110  | 7.431  | 5.01  |
| CEP135  | 5.67   | 1.4   |
| CEP152  | 4.344  | 2.19  |
| CEP164  | 5.629  | 4.03  |
| CEP170  | 6.816  | 3.86  |
| CEP170L | 97.094 | 0.1   |
| CEP192  | 9.438  | 2.43  |
| CEP250  | 8.348  | 8.07  |
| CEP27   | 1.754  | 3.94  |
| CEP290  | 7.951  | 1.39  |
| CEP350  | 11.74  | 2.06  |
| CEP55   | 2.618  | 3.7   |
| CEP57   | 3.158  | 8.83  |
| CEP63   | 2.77   | 6.96  |
| CEP68   | 2.713  | 22.01 |
| CEP70   | 2.663  | 2.4   |
| CEP72   | 2.355  | 1.61  |

|          |        |        |
|----------|--------|--------|
| CEP76    | 2.869  | 1.38   |
| CEP78    | 2.304  | 1.65   |
| CEPT1    | 2.348  | 10.48  |
| CER1     | 1.206  | 0      |
| CERK     | 7.467  | 15.59  |
| CERKL    | 3.822  | 11.07  |
| CES1     | 2.299  | 0.14   |
| CES2     | 4.033  | 11.34  |
| CES4     | 2.259  | 0      |
| CES7     | 1.962  | 0      |
| CESK1    | 2.053  | 0      |
| CETN1    | 1.158  | 0      |
| CETN2    | 1.08   | 11.46  |
| CETN3    | 0.982  | 8.32   |
| CETP     | 1.79   | 1.27   |
| CFB      | 7.722  | 0      |
| CFC1     | 1.009  | 0      |
| CFD      | 1.173  | 1.08   |
| CFDP1    | 1.279  | 44.92  |
| CFH      | 4.243  | 0.08   |
| CFHR1    | 1.262  | 0.07   |
| CFHR2    | 1.036  | 0      |
| CFHR3    | 1.597  | 0      |
| CFHR4    | 1.262  | 0      |
| CFHR5    | 2.794  | 0      |
| CFI      | 1.963  | 0      |
| CFL1     | 1.26   | 604.96 |
| CFL2     | 3.232  | 0.57   |
| CFLAR    | 2.412  | 5.69   |
| CFLP1    | 26.779 | 0      |
| CFP      | 1.701  | 15.1   |
| CFTR     | 12.264 | 0      |
| CG018    | 2.107  | 8.4    |
| CGA      | 0.704  | 0      |
| CGB      | 0.879  | 0      |
| CGB1     | 0.732  | 0      |
| CGB2     | 0.732  | 0      |
| CGB5     | 0.88   | 0      |
| CGB7     | 0.88   | 0      |
| CGB8     | 0.88   | 0      |
| CGGBP1   | 4.539  | 12.68  |
| CGI-09   | 2.311  | 5.54   |
| CGI-148P | 1.833  | 0.32   |
| CGI-38   | 1.132  | 0.22   |
| CGN      | 5.088  | 0.03   |
| CGNL1    | 7.218  | 0.09   |
| CGREF1   | 1.848  | 0.04   |
| CGRRF1   | 1.323  | 2.86   |
| CH25H    | 1.381  | 0.06   |
| CHAC1    | 1.498  | 1.01   |

|            |        |       |
|------------|--------|-------|
| CHAC2      | 1.275  | 1.32  |
| CHAD       | 1.783  | 0.28  |
| CHAF1A     | 3.343  | 10.91 |
| CHAF1B     | 2.279  | 4.25  |
| CHAT       | 3.042  | 0     |
| CHCHD1     | 0.549  | 23.79 |
| CHCHD2     | 2.563  | 12.88 |
| CHCHD3     | 3.19   | 9.21  |
| CHCHD4     | 1.549  | 5.06  |
| CHCHD5     | 0.673  | 19.27 |
| CHCHD6     | 0.946  | 8.46  |
| CHCHD7     | 3.318  | 16.38 |
| CHCHD8     | 0.817  | 44.85 |
| CHCHD9     | 0.774  | 45.82 |
| CHD1       | 6.457  | 4.42  |
| CHD1L      | 2.967  | 18.29 |
| CHD2       | 11.459 | 11.96 |
| CHD3       | 7.663  | 86.28 |
| CHD4       | 6.497  | 55.72 |
| CHD5       | 9.646  | 0.02  |
| CHD6       | 10.389 | 3.98  |
| CHD7       | 10.444 | 4.2   |
| CHD8       | 7.387  | 11.08 |
| CHD9       | 10.836 | 3.88  |
| CHDH       | 2.147  | 0     |
| CHEK1      | 2.007  | 4.61  |
| CHEK2      | 1.987  | 5.22  |
| CHERP      | 4.075  | 16.77 |
| CHES1      | 7.818  | 13.43 |
| CHFR       | 3.138  | 8.59  |
| CHGA       | 1.994  | 0     |
| CHGB       | 2.454  | 0     |
| ChGn       | 3.872  | 4.83  |
| CHI3L1     | 1.921  | 1.97  |
| CHI3L2     | 1.843  | 0.23  |
| CHIA       | 1.422  | 0     |
| CHIC1      | 4.158  | 0.14  |
| CHIC2      | 1.125  | 3.75  |
| CHID1      | 2.736  | 19.27 |
| CHIT1      | 1.635  | 0.93  |
| CHKA       | 2.717  | 18.6  |
| CHKB       | 1.595  | 15.37 |
| CHKB-CPT1B | 0.1    | 0     |
| CHL1       | 7.65   | 0.01  |
| CHM        | 5.442  | 2     |
| CHML       | 7.067  | 1.48  |
| CHMP1B     | 1.272  | 27.68 |
| CHMP2A     | 1.032  | 57.87 |
| CHMP2B     | 2.395  | 3.27  |
| CHMP4A     | 1.505  | 27.81 |



|           |       |       |
|-----------|-------|-------|
| CHMP4B    | 1.635 | 69.14 |
| CHMP4C    | 1.847 | 0     |
| CHMP5     | 1.39  | 7.09  |
| CHMP6     | 1.61  | 14.18 |
| CHMP7     | 3.386 | 7.94  |
| CHN1      | 2.957 | 2.28  |
| CHN2      | 7.848 | 3.68  |
| CHODL     | 2.545 | 0.1   |
| CHORDC1   | 2.039 | 4.38  |
| CHORDC2P  | 2.392 | 0     |
| CHP       | 3.23  | 15.83 |
| CHPF      | 2.933 | 0.12  |
| CHPT1     | 1.567 | 8.55  |
| CHR415SYT | 2.584 | 0     |
| CHRAC1    | 2.497 | 10.93 |
| CHRD      | 3.521 | 0     |
| CHRD1     | 2.471 | 0.34  |
| CHRD2     | 1.678 | 0     |
| CHRFAM7A  | 3.026 | 0.08  |
| CHRM1     | 2.823 | 0     |
| CHRM2     | 6.778 | 0.01  |
| CHRM3     | 2.748 | 0     |
| CHRM4     | 1.468 | 0.46  |
| CHRM5     | 2.683 | 0     |
| CHRNA1    | 2.04  | 79.28 |
| CHRNA10   | 1.945 | 0.17  |
| CHRNA2    | 2.666 | 0     |
| CHRNA3    | 2.999 | 0.59  |
| CHRNA4    | 5.54  | 0     |
| CHRNA5    | 2.428 | 0.32  |
| CHRNA6    | 2.09  | 0     |
| CHRNA7    | 2.171 | 0.16  |
| CHRNA9    | 1.892 | 0.04  |
| CHRN1     | 2.437 | 1.59  |
| CHRN2     | 2.448 | 0.07  |
| CHRN3     | 1.956 | 0     |
| CHRN4     | 2.448 | 13.84 |
| CHRND     | 1.741 | 0     |
| CHRNE     | 2.463 | 6.3   |
| CHRNG     | 2.187 | 0.12  |
| CHST1     | 2.718 | 0.03  |
| CHST10    | 2.815 | 5.47  |
| CHST11    | 3.825 | 40.85 |
| CHST12    | 4.206 | 8.49  |
| CHST13    | 1.739 | 0     |
| CHST2     | 3.043 | 10.52 |
| CHST3     | 6.963 | 1.94  |
| CHST4     | 2.011 | 0     |
| CHST5     | 5.282 | 0.03  |
| CHST6     | 3.751 | 0     |

|             |       |        |
|-------------|-------|--------|
| CHST7       | 3.456 | 6.97   |
| CHST8       | 2.479 | 0      |
| CHST9       | 2.136 | 0      |
| CHSY1       | 4.535 | 21.61  |
| CHSY-2      | 3.492 | 0      |
| CHTF18      | 3.065 | 5.44   |
| CHUK        | 3.524 | 2.66   |
| CHURC1      | 3.381 | 10.74  |
| CHX10       | 2.995 | 0      |
| CIAO1       | 4.053 | 12.57  |
| CIAPIN1     | 2.106 | 19.6   |
| CIB1        | 0.862 | 30.69  |
| CIB2        | 1.547 | 1.42   |
| CIB3        | 0.661 | 0      |
| CIB4        | 0.745 | 0      |
| CIC         | 5.473 | 42.32  |
| CICE        | 9.387 | 0.93   |
| CICK0721Q.1 | 1.198 | 0.35   |
| CIDEA       | 1.164 | 0.08   |
| CIDEB       | 3.405 | 28.32  |
| CIDEC       | 1.277 | 0.99   |
| CIITA       | 5.674 | 78.46  |
| CILP        | 4.432 | 0      |
| CILP2       | 3.593 | 0.03   |
| CINP        | 0.979 | 16.69  |
| CIP29       | 0.892 | 27.85  |
| CIR         | 1.793 | 18.18  |
| CIRBP       | 1.317 | 202.18 |
| CIRH1A      | 2.192 | 19.64  |
| CISH        | 2.017 | 42.1   |
| CIT         | 8.576 | 3.99   |
| CITED1      | 1.184 | 0      |
| CITED2      | 1.93  | 15.71  |
| CITED4      | 1.291 | 34.84  |
| CIZ1        | 3.032 | 48.73  |
| CKAP2       | 3.626 | 10.41  |
| CKAP2L      | 3.205 | 3.76   |
| CKAP4       | 2.915 | 7.28   |
| CKAP5       | 6.698 | 15.42  |
| CKB         | 1.431 | 1.12   |
| CKBP1       | 2.162 | 0      |
| CKLF        | 1.313 | 72.17  |
| CKM         | 1.557 | 0.05   |
| CKMT1A      | 1.779 | 0      |
| CKMT1B      | 1.779 | 0      |
| CKMT2       | 1.598 | 1.9    |
| CKS1A       | 0.717 | 1.65   |
| CKS1B       | 0.717 | 2.47   |
| CKS1BP      | 0.718 | 0      |
| CKS1BP2     | 0.709 | 0.24   |

|         |       |        |
|---------|-------|--------|
| CKS1BP3 | 0.709 | 0.24   |
| CKS2    | 0.613 | 58.26  |
| CLASP1  | 8.287 | 6.88   |
| CLASP2  | 7.261 | 2      |
| CLC     | 0.63  | 0.26   |
| CLCA1   | 3.312 | 0      |
| CLCA2   | 3.969 | 0      |
| CLCA3   | 3.412 | 0      |
| CLCA4   | 3.211 | 0      |
| CLCC1   | 2.226 | 5.94   |
| CLCF1   | 1.842 | 0.23   |
| CLCN1   | 6.186 | 0      |
| CLCN2   | 2.697 | 0.84   |
| CLCN3   | 5.151 | 4.91   |
| CLCN4   | 4.557 | 0.74   |
| CLCN5   | 3.177 | 0.03   |
| CLCN6   | 5.937 | 2.86   |
| CLCN7   | 3.994 | 37.71  |
| CLCNKA  | 2.461 | 0      |
| CLCNKB  | 2.16  | 0      |
| CLCP1   | 0.608 | 0.14   |
| CLDN1   | 3.429 | 0      |
| CLDN10  | 2.817 | 0      |
| CLDN11  | 2.157 | 0.12   |
| CLDN12  | 6.938 | 0.5    |
| CLDN14  | 2.003 | 0      |
| CLDN15  | 5.151 | 6.08   |
| CLDN16  | 1.494 | 0      |
| CLDN17  | 0.675 | 0      |
| CLDN18  | 3.632 | 0      |
| CLDN19  | 2.859 | 0      |
| CLDN2   | 2.959 | 0      |
| CLDN20  | 1.209 | 0.28   |
| CLDN22  | 0.522 | 0      |
| CLDN23  | 1.576 | 0.05   |
| CLDN3   | 2.5   | 0      |
| CLDN4   | 3.646 | 0      |
| CLDN5   | 1.699 | 0.45   |
| CLDN6   | 1.344 | 0      |
| CLDN7   | 1.298 | 3.89   |
| CLDN8   | 1.989 | 0      |
| CLDN9   | 1.715 | 0.05   |
| CLDND1  | 3.619 | 5.01   |
| CLDND2  | 0.974 | 0.87   |
| CLEC10A | 1.867 | 0.54   |
| CLEC11A | 1.407 | 477.04 |
| CLEC12A | 1.549 | 0.32   |
| CLEC12B | 3.029 | 0      |
| CLEC14A | 2.256 | 101.26 |
| CLEC1A  | 1.779 | 0      |

|         |        |       |
|---------|--------|-------|
| CLEC1B  | 0.952  | 0     |
| CLEC2A  | 0.732  | 0     |
| CLEC2B  | 2.038  | 26.12 |
| CLEC2D  | 4.593  | 6.73  |
| CLEC2L  | 0.81   | 0     |
| CLEC3A  | 1.887  | 0     |
| CLEC3B  | 0.841  | 1.8   |
| CLEC4A  | 1.377  | 0.8   |
| CLEC4C  | 1.314  | 0.07  |
| CLEC4D  | 1.936  | 0     |
| CLEC4E  | 2.158  | 0.04  |
| CLEC4F  | 2.475  | 0     |
| CLEC4G  | 1.304  | 0.39  |
| CLEC4M  | 5.242  | 0.08  |
| CLEC5A  | 7.022  | 0.03  |
| CLEC6A  | 1.613  | 0     |
| CLEC7A  | 4.546  | 0     |
| CLEC9A  | 1.673  | 0.1   |
| CLGN    | 2.705  | 0.06  |
| CLIC1   | 3.753  | 0.4   |
| CLIC2   | 2.686  | 0.41  |
| CLIC3   | 0.813  | 0.2   |
| CLIC4   | 4.29   | 5.11  |
| CLIC5   | 5.703  | 0     |
| CLIC6   | 3.8    | 0     |
| CLINT1  | 3.425  | 14.78 |
| CLIP1   | 5.88   | 5.57  |
| CLIP2   | 11.11  | 17.91 |
| CLIP3   | 3.349  | 2.67  |
| CLIP4   | 4.261  | 0     |
| CLK1    | 2.394  | 12.53 |
| CLK2    | 2.737  | 24.9  |
| CLK2P   | 26.923 | 0.43  |
| CLK3    | 2.463  | 20.65 |
| CLK4    | 2.507  | 4.64  |
| CLLU1   | 3.897  | 0     |
| CLLU1OS | 0.686  | 0     |
| CLMN    | 3.118  | 0.48  |
| CLN3    | 1.689  | 14.22 |
| CLN5    | 4.064  | 2.23  |
| CLN6    | 2.187  | 31.04 |
| CLN8    | 4.817  | 1.09  |
| CLNS1A  | 1.366  | 37.19 |
| CLNS1B  | 1.319  | 1.15  |
| CLOCK   | 0.1    | 33.69 |
| CLP1    | 2.432  | 3.81  |
| CLPB    | 3.382  | 8.86  |
| CLPP    | 1.151  | 56.35 |
| CLPS    | 0.539  | 0     |
| CLPSMCR | 2.276  | 0     |

|         |        |        |
|---------|--------|--------|
| CLPTM1  | 2.469  | 41.76  |
| CLPTM1L | 2.148  | 70.59  |
| CLPX    | 2.351  | 11.46  |
| CLRN1   | 3.623  | 0      |
| CLRN2   | 0.855  | 0      |
| CLRN3   | 1.143  | 0      |
| CLSPN   | 4.379  | 1.1    |
| CLSTN1  | 5.192  | 83.83  |
| CLSTN2  | 4.421  | 0      |
| CLSTN3  | 3.187  | 2.91   |
| CLTA    | 1.188  | 40.98  |
| CLTB    | 1.185  | 55.73  |
| CLTC    | 6.525  | 48.66  |
| CLTCL1  | 5.483  | 0.71   |
| CLU     | 3.244  | 0.2    |
| CLUAP1  | 3.219  | 4.11   |
| CLUL1   | 2.001  | 0      |
| CLYBL   | 2.73   | 1.02   |
| CMA1    | 0.784  | 0      |
| CMAH    | 58.691 | 0.3    |
| CMAS    | 1.741  | 8.23   |
| CMBL    | 4.047  | 7.74   |
| CMIP    | 4.382  | 18.4   |
| CMKLR1  | 1.882  | 0.04   |
| CMPK    | 2.811  | 24.3   |
| CMTM1   | 1.55   | 2.99   |
| CMTM2   | 1.365  | 39.56  |
| CMTM3   | 2.563  | 71.45  |
| CMTM4   | 10.887 | 0.48   |
| CMTM5   | 1.2    | 0.07   |
| CMTM6   | 3.366  | 22     |
| CMTM7   | 1.351  | 29.93  |
| CMTM8   | 1.17   | 11.88  |
| CMYA1   | 6.451  | 0.05   |
| CMYA3   | 10.221 | 0      |
| CMYA5   | 12.892 | 0      |
| CNBD1   | 1.593  | 0      |
| CNBP    | 1.496  | 169.14 |
| CNDP1   | 2.198  | 0      |
| CNDP2   | 2.643  | 57.81  |
| CNFN    | 0.523  | 0.65   |
| CNGA1   | 2.525  | 0.07   |
| CNGA2   | 3.285  | 0      |
| CNGA3   | 3.47   | 0      |
| CNGA4   | 1.851  | 0.04   |
| CNGB1   | 4.344  | 0      |
| CNGB3   | 4.347  | 0      |
| CNIH    | 2.48   | 15.32  |
| CNIH2   | 1.33   | 0.19   |
| CNIH3   | 2.372  | 0.18   |

|         |        |       |
|---------|--------|-------|
| CNIH4   | 0.623  | 9.06  |
| CNKSR1  | 2.514  | 0.43  |
| CNKSR2  | 3.281  | 0.03  |
| CNKSR3  | 3.228  | 2.53  |
| CNN1    | 1.586  | 0     |
| CNN2    | 2.458  | 7.47  |
| CNN3    | 2.032  | 9.37  |
| CNNM1   | 4.782  | 0     |
| CNNM2   | 4.33   | 0.89  |
| CNNM3   | 4.916  | 7.86  |
| CNNM4   | 4.8    | 3.2   |
| CNO     | 1.546  | 6.16  |
| CNOT1   | 9.008  | 20.81 |
| CNOT10  | 2.741  | 9.81  |
| CNOT2   | 3.28   | 14.79 |
| CNOT3   | 2.855  | 31.93 |
| CNOT4   | 8.396  | 1.15  |
| CNOT6   | 6.176  | 4.1   |
| CNOT6L  | 2.267  | 9.18  |
| CNOT7   | 3.671  | 10.21 |
| CNOT8   | 2.483  | 32.77 |
| CNP     | 5.222  | 19.32 |
| CNPY1   | 2.718  | 0     |
| CNR1    | 6.789  | 0     |
| CNR2    | 1.775  | 8.4   |
| CNTD1   | 2.241  | 0.15  |
| CNTD2   | 1.783  | 0.09  |
| CNTF    | 1.891  | 0     |
| CNTFR   | 2.038  | 0     |
| CNTN1   | 3.427  | 0     |
| CNTN2   | 7.637  | 0     |
| CNTN3   | 4.997  | 0     |
| CNTN4   | 5.988  | 0     |
| CNTN5   | 4.164  | 0     |
| CNTN6   | 3.53   | 0     |
| CNTNAP1 | 5.275  | 0.22  |
| CNTNAP2 | 19.775 | 0.01  |
| CNTNAP3 | 5.229  | 0     |
| CNTNAP4 | 4.91   | 0     |
| CNTNAP5 | 5.481  | 0     |
| CNTROB  | 4.831  | 10.13 |
| COASY   | 2.452  | 24.81 |
| COBL    | 10.581 | 0.39  |
| COBLL1  | 4.923  | 0.05  |
| COBRA1  | 2.372  | 34.45 |
| COCH    | 2.534  | 15.36 |
| COG1    | 3.035  | 8.33  |
| COG2    | 2.901  | 6.85  |
| COG3    | 4.482  | 5.18  |
| COG4    | 2.797  | 22.68 |

|          |        |       |
|----------|--------|-------|
| COG5     | 7.208  | 1.84  |
| COG6     | 3.427  | 4.33  |
| COG7     | 2.79   | 6.31  |
| COG8     | 2.482  | 13.61 |
| COIL     | 2.634  | 5.18  |
| COILP1   | 2.595  | 0.55  |
| COILP2   | 2.351  | 0.4   |
| COL10A1  | 3.26   | 0     |
| COL11A1  | 6.472  | 0.02  |
| COL11A2  | 19.275 | 0     |
| COL12A1  | 11.579 | 0     |
| COL13A1  | 3.239  | 0     |
| COL14A1  | 6.459  | 0.03  |
| COL15A1  | 5.211  | 0.02  |
| COL16A1  | 5.462  | 0.09  |
| COL17A1  | 5.947  | 0.11  |
| COL18A1  | 6.058  | 1.27  |
| COL19A1  | 8.725  | 0     |
| COL1A1   | 5.92   | 0.76  |
| COL1A2   | 10.829 | 0.14  |
| COL20A1  | 4.171  | 0     |
| COL21A1  | 4.173  | 0     |
| COL22A1  | 6.346  | 0     |
| COL23A1  | 3.061  | 8.29  |
| COL24A1  | 6.5    | 0     |
| COL25A1  | 2.959  | 0.06  |
| COL27A1  | 5.756  | 2.63  |
| COL28A1  | 7.031  | 0     |
| COL2A1   | 5.06   | 0     |
| COL3A1   | 5.49   | 0.15  |
| COL4A1   | 6.494  | 0.17  |
| COL4A2   | 6.264  | 0.65  |
| COL4A3   | 14.108 | 0     |
| COL4A3BP | 2.544  | 4.4   |
| COL4A4   | 7.844  | 0     |
| COL4A5   | 6.445  | 0     |
| COL4A6   | 6.815  | 0     |
| COL5A1   | 8.439  | 6.96  |
| COL5A2   | 6.93   | 0.09  |
| COL5A3   | 6.174  | 0.09  |
| COL6A1   | 4.225  | 1.4   |
| COL6A2   | 4.942  | 0.65  |
| COL6A3   | 10.658 | 24.47 |
| COL7A1   | 9.261  | 0.03  |
| COL8A1   | 2.658  | 0.06  |
| COL8A2   | 4.443  | 0.38  |
| COL9A1   | 3.932  | 0     |
| COL9A2   | 2.831  | 0.51  |
| COL9A3   | 2.511  | 0     |
| COLEC10  | 1.686  | 0     |

|         |       |        |
|---------|-------|--------|
| COLEC11 | 1.539 | 0      |
| COLEC12 | 6.022 | 0.04   |
| COLQ    | 7.197 | 36.12  |
| COMMD1  | 2.288 | 15.65  |
| COMMD10 | 1.427 | 5.97   |
| COMMD2  | 1.583 | 4.41   |
| COMMD3  | 0.946 | 19.77  |
| COMMD4  | 0.925 | 30.14  |
| COMMD5  | 3.112 | 2.6    |
| COMMD6  | 1.138 | 45.3   |
| COMMD7  | 1.464 | 36.65  |
| COMMD8  | 1.412 | 3.52   |
| COMMD9  | 1.286 | 25.02  |
| COMP    | 2.452 | 0      |
| COMT    | 1.559 | 85.37  |
| COMTD1  | 0.975 | 2.68   |
| COP1    | 1.152 | 42.85  |
| COPA    | 5.024 | 28.2   |
| COPB1   | 3.48  | 22.77  |
| COPB2   | 3.062 | 26.68  |
| COPE    | 1.134 | 143.89 |
| COPG    | 3.074 | 38.75  |
| COPG2   | 3.589 | 6.76   |
| COPS2   | 1.947 | 10.08  |
| COPS3   | 1.636 | 32.95  |
| COPS4   | 1.748 | 14.36  |
| COPS5   | 1.49  | 22.95  |
| COPS6   | 2.852 | 22.15  |
| COPS7A  | 1.795 | 21.92  |
| COPS7B  | 1.977 | 28.88  |
| COPS8   | 2.996 | 9.62   |
| COPZ1   | 1.897 | 67.89  |
| COPZ2   | 0.9   | 0      |
| COQ10A  | 1.568 | 4.46   |
| COQ10B  | 1.974 | 3.33   |
| COQ2    | 1.538 | 5.42   |
| COQ3    | 1.259 | 1.54   |
| COQ4    | 1.548 | 25.2   |
| COQ5    | 1.496 | 19.43  |
| COQ6    | 1.976 | 6.43   |
| COQ7    | 2.588 | 4      |
| COQ9    | 1.616 | 23.35  |
| CORIN   | 4.942 | 0      |
| CORO1A  | 1.62  | 166.7  |
| CORO1B  | 2.012 | 46.43  |
| CORO1C  | 3.815 | 13.72  |
| CORO2A  | 2.509 | 0.07   |
| CORO2B  | 3.302 | 32.99  |
| CORO6   | 1.844 | 1.56   |
| CORO7   | 3.444 | 13.04  |



|         |       |        |
|---------|-------|--------|
| CORT    | 0.935 | 0.18   |
| COTL1   | 1.827 | 5.17   |
| COTL1P2 | 2.179 | 0      |
| COVA1   | 4.319 | 5.71   |
| COX1    | 1.542 | 0      |
| COX10   | 3     | 4.72   |
| COX11   | 2.703 | 5.01   |
| COX11P  | 0.835 | 1.01   |
| COX15   | 5.706 | 4.67   |
| COX17   | 0.423 | 30.27  |
| COX17P  | 0.192 | 25.88  |
| COX18   | 4.523 | 1.68   |
| COX19   | 7.215 | 2.86   |
| COX2    | 0.684 | 0      |
| COX3    | 0.781 | 0      |
| COX4I1  | 0.802 | 382.31 |
| COX4I2  | 0.684 | 0      |
| COX4NB  | 1.911 | 10.18  |
| COX5A   | 0.644 | 145.32 |
| COX5AP1 | 0.449 | 13.51  |
| COX5AP2 | 0.571 | 11.36  |
| COX5B   | 0.505 | 204.66 |
| COX5BL1 | 0.466 | 12.65  |
| COX5BL7 | 0.388 | 0      |
| COX6A1  | 0.548 | 191.53 |
| COX6A1P | 0.262 | 1.29   |
| COX6A2  | 0.409 | 0      |
| COX6B1  | 0.558 | 243.19 |
| COX6B2  | 1.663 | 0      |
| COX6BP1 | 1.432 | 3.06   |
| COX6BP2 | 0.145 | 0      |
| COX6BP3 | 0.493 | 0      |
| COX6C   | 0.425 | 112.38 |
| COX6CP1 | 0.215 | 24.29  |
| COX6CP2 | 0.225 | 0      |
| COX7A1  | 0.762 | 2.87   |
| COX7A2  | 0.47  | 132.27 |
| COX7A2L | 1.117 | 73.98  |
| COX7AP1 | 0.401 | 0      |
| COX7AP2 | 0.321 | 18.9   |
| COX7B   | 0.456 | 96.43  |
| COX7B2  | 0.47  | 0      |
| COX7BP1 | 0.244 | 8.63   |
| COX7BP2 | 0.458 | 0      |
| COX7C   | 0.407 | 224.15 |
| COX7CP1 | 0.19  | 51.87  |
| COX8A   | 0.507 | 232.27 |
| COX8B   | 3.556 | 0      |
| COX8C   | 0.531 | 0      |
| CP      | 3.323 | 0.1    |

|         |       |        |
|---------|-------|--------|
| CP110   | 5.474 | 3.4    |
| CPA1    | 2.728 | 0      |
| CPA2    | 2.612 | 0      |
| CPA3    | 1.633 | 0.2    |
| CPA4    | 5.58  | 0.02   |
| CPA5    | 5.15  | 0      |
| CPA6    | 1.861 | 0      |
| CPAMD8  | 5.836 | 0.03   |
| CPB1    | 1.462 | 0      |
| CPB2    | 2.283 | 0.22   |
| CPD     | 8.025 | 2.36   |
| CPE     | 2.431 | 0      |
| CPEB1   | 2.776 | 0      |
| CPEB2   | 5.627 | 0.28   |
| CPEB3   | 5.84  | 0.54   |
| CPEB4   | 6.909 | 0.81   |
| CPLX1   | 2.14  | 0.12   |
| CPLX2   | 4.934 | 0      |
| CPLX3   | 2.012 | 0      |
| CPLX4   | 1.946 | 0      |
| CPM     | 6.767 | 4.51   |
| CPN1    | 1.701 | 0      |
| CPN2    | 3.028 | 0.03   |
| CPNE1   | 2.885 | 75.33  |
| CPNE2   | 2.181 | 111.35 |
| CPNE3   | 4.848 | 12.98  |
| CPNE4   | 2.576 | 0      |
| CPNE5   | 3.339 | 2.42   |
| CPNE6   | 2.01  | 0      |
| CPNE7   | 2.657 | 3.11   |
| CPNE8   | 3.461 | 0.05   |
| CPNE9   | 2.049 | 0.7    |
| CPO     | 1.125 | 0      |
| CPOX    | 2.695 | 4.25   |
| CPS1    | 5.745 | 1.07   |
| CPSF1   | 4.494 | 30.22  |
| CPSF1P1 | 3.801 | 1.93   |
| CPSF2   | 5.041 | 5.78   |
| CPSF3   | 2.171 | 19.32  |
| CPSF3L  | 2.639 | 28.16  |
| CPSF4   | 3.385 | 7.39   |
| CPSF6   | 3.667 | 21.18  |
| CPT1A   | 4.717 | 32.64  |
| CPT1B   | 3.121 | 5.23   |
| CPT1C   | 2.743 | 0.55   |
| CPT2    | 3.092 | 5.83   |
| CPVL    | 3.776 | 5.24   |
| CPXCR1  | 1.594 | 0      |
| CPXM1   | 2.39  | 36.69  |
| CPXM2   | 3.724 | 0      |

|          |        |       |
|----------|--------|-------|
| CPZ      | 3.114  | 1.87  |
| CR1      | 9.966  | 0.06  |
| CR1L     | 1.793  | 0.05  |
| CR2      | 4.145  | 0.04  |
| CRABP1   | 0.738  | 0     |
| CRABP2   | 0.969  | 0     |
| CRADD    | 1.328  | 63.11 |
| CRAMP1L  | 7.413  | 6.49  |
| CRAT     | 3.195  | 6.99  |
| CRB1     | 4.932  | 0     |
| CRB2     | 5.64   | 0.37  |
| CRB3     | 1.523  | 0     |
| CRBN     | 2.202  | 7.5   |
| CRCT1    | 0.695  | 0     |
| CREB1    | 3.499  | 7.56  |
| CREB3    | 1.851  | 9.06  |
| CREB3L1  | 2.338  | 31.85 |
| CREB3L2  | 14.906 | 3.06  |
| CREB3L3  | 2.586  | 0     |
| CREB3L4  | 1.747  | 17.22 |
| CREB5    | 17.979 | 0.03  |
| CREBBP   | 8.936  | 15.25 |
| CREBL1   | 5.238  | 30.03 |
| CREBL2   | 3.748  | 4.25  |
| CREBZF   | 7.304  | 2.68  |
| CREG1    | 2.026  | 12.64 |
| CREG2    | 3.173  | 0     |
| CRELD1   | 2.991  | 10.87 |
| CRELD2   | 1.357  | 45.44 |
| CREM     | 6.215  | 0.88  |
| CRH      | 1.279  | 0     |
| CRHBP    | 1.838  | 0.23  |
| CRHR1    | 2.535  | 0     |
| CRHR2    | 4.224  | 0     |
| CRIM1    | 5.584  | 10.65 |
| CRIM2    | 4.104  | 0.63  |
| CRIP1    | 0.414  | 35.4  |
| CRIP2    | 1.206  | 9.15  |
| CRIP3    | 0.654  | 1.03  |
| CRIPAK   | 1.935  | 4.4   |
| CRIPT    | 1.24   | 3.47  |
| CRISP1   | 3.075  | 0     |
| CRISP2   | 1.383  | 0.06  |
| CRISP3   | 2.107  | 0.88  |
| CRISPLD1 | 4.061  | 0.62  |
| CRISPLD2 | 4.562  | 0     |
| CRK      | 4.286  | 2.83  |
| CRKL     | 5.178  | 13.68 |
| CRKRS    | 6.169  | 7.8   |
| CRLF1    | 1.792  | 0     |

|          |        |       |
|----------|--------|-------|
| CRLF2    | 0.936  | 0     |
| CRLF3    | 2.854  | 8.62  |
| CRLS1    | 1.155  | 6.64  |
| CRMP1    | 3.507  | 2.04  |
| CRNKL1   | 4.406  | 4.89  |
| CRNN     | 1.891  | 0     |
| CROCC    | 6.642  | 3.15  |
| CROP     | 4.011  | 32.36 |
| CROT     | 6.346  | 0.51  |
| CRP      | 2.015  | 0     |
| CRPP1    | 0.825  | 0     |
| CRSP2    | 7.984  | 3.83  |
| CRSP3    | 5.713  | 2.63  |
| CRSP6    | 3.412  | 2.51  |
| CRSP7    | 3.184  | 3.31  |
| CRSP8    | 1.384  | 14.55 |
| CRSP9    | 1.066  | 3.95  |
| CRTAC1   | 2.889  | 0     |
| CRTAM    | 2.422  | 0.1   |
| CRTAP    | 6.622  | 26.78 |
| CRTC1    | 3.216  | 7.33  |
| CRTC2    | 2.586  | 32.48 |
| CRTC3    | 3.947  | 8.17  |
| CRX      | 4.461  | 0     |
| CRY1     | 2.985  | 5.75  |
| CRY2     | 4.129  | 6.99  |
| CRYAA    | 1.114  | 0     |
| CRYAB    | 0.691  | 0.12  |
| CRYBA1   | 0.8    | 0     |
| CRYBA2   | 0.945  | 0     |
| CRYBA4   | 0.807  | 0     |
| CRYBB1   | 0.921  | 2.74  |
| CRYBB2   | 0.722  | 0.58  |
| CRYBB2P1 | 13.582 | 0.65  |
| CRYBB3   | 0.853  | 0     |
| CRYGA    | 0.697  | 0     |
| CRYGB    | 0.629  | 0     |
| CRYGC    | 0.7    | 0     |
| CRYGD    | 0.606  | 0     |
| CRYGEP1  | 4.737  | 0     |
| CRYGFP1  | 2.679  | 0     |
| CRYGGP1  | 0.285  | 0     |
| CRYGN    | 1.446  | 0.18  |
| CRYGS    | 0.842  | 0.8   |
| CRYL1    | 1.528  | 13.17 |
| CRYM     | 1.497  | 0.79  |
| CRYZ     | 1.887  | 6.12  |
| CRYZL1   | 1.711  | 2.61  |
| CS       | 3.399  | 49.86 |
| CSAD     | 2.645  | 1.65  |

|           |        |       |
|-----------|--------|-------|
| CSAG1     | 1.093  | 0     |
| CSAG2     | 0.788  | 0     |
| CSAG3A    | 0.789  | 0     |
| CSDA      | 1.913  | 216.2 |
| CSDC2     | 2.304  | 0     |
| CSDE1     | 5.368  | 63.82 |
| CSE1L     | 3.561  | 12.4  |
| CSF1      | 4.107  | 0.41  |
| CSF1R     | 6.102  | 33.62 |
| CSF2      | 0.781  | 0     |
| CSF2RA    | 3.153  | 0.16  |
| CSF2RB    | 2.996  | 2.73  |
| CSF2RB2   | 3.194  | 0     |
| CSF3      | 2.084  | 0     |
| CSF3R     | 4.705  | 1.27  |
| CSGlcA-T  | 7.94   | 5.37  |
| CSH1      | 1.604  | 0     |
| CSH2      | 1.613  | 0     |
| CSHL1     | 1.076  | 0     |
| CSK       | 2.607  | 77.9  |
| CSMD1     | 11.814 | 0     |
| CSMD2     | 13.108 | 0.01  |
| CSMD3     | 13.692 | 0.01  |
| CSN1S1    | 1.02   | 0     |
| CSN1S2A   | 0.779  | 0     |
| CSN2      | 1.066  | 0     |
| CSN3      | 0.82   | 0     |
| CSNK1A1   | 3.697  | 29.62 |
| CSNK1A1L  | 2.407  | 1.85  |
| CSNK1D    | 2.517  | 23.46 |
| CSNK1E    | 3.31   | 38.81 |
| CSNK1G1   | 8.06   | 2.58  |
| CSNK1G2   | 2.647  | 41.82 |
| CSNK1G3   | 4.376  | 2.17  |
| CSNK2A1   | 3.814  | 18.2  |
| CSNK2A1P  | 1.584  | 9.79  |
| CSNK2A2   | 3.518  | 19.68 |
| CSNK2B    | 3.384  | 1.02  |
| CSPG4     | 7.896  | 0.26  |
| CSPG4LYP1 | 4.593  | 0     |
| CSPG4LYP2 | 4.593  | 0     |
| CSPG5     | 1.988  | 0     |
| CSPP1     | 3.715  | 2.29  |
| CSRP1     | 1.817  | 40.19 |
| CSRP2     | 0.901  | 24.49 |
| CSRP2BP   | 4.259  | 5.48  |
| CSRP2P    | 0.754  | 5.81  |
| CSRP3     | 1.353  | 0     |
| CST1      | 0.76   | 0     |
| CST11     | 0.553  | 0     |

|               |        |        |
|---------------|--------|--------|
| CST2          | 0.694  | 0      |
| CST3          | 0.775  | 20.33  |
| CST4          | 0.736  | 0      |
| CST5          | 0.74   | 0      |
| CST6          | 0.609  | 0      |
| CST7          | 0.928  | 8.8    |
| CST8          | 0.895  | 0      |
| CST9          | 1.592  | 0      |
| CST9L         | 0.902  | 0      |
| CSTA          | 0.828  | 0.92   |
| CSTB          | 0.658  | 229.28 |
| CSTF1         | 2.656  | 10.82  |
| CSTF2         | 2.017  | 5.89   |
| CSTF2T        | 4.11   | 11.74  |
| CSTF3         | 3.711  | 5.81   |
| CSTL1         | 0.736  | 0      |
| CSTP1         | 3.399  | 0      |
| CSTP2         | 3.311  | 0      |
| CT45-1        | 1.008  | 0      |
| CT45-4        | 1.008  | 0      |
| CT45-6        | 1.008  | 0      |
| CT47.13       | 0.9    | 0      |
| CT47.7        | 1.288  | 0      |
| CT47.8        | 1.288  | 0      |
| CTA-126B4.3   | 1.205  | 54.04  |
| CTA-216E10.6  | 4.975  | 3.86   |
| CTA-221G9.4   | 8.164  | 0.11   |
| CTA-246H3.1   | 0.914  | 0.65   |
| CTAG1A        | 0.748  | 0      |
| CTAG1B        | 0.746  | 0      |
| CTAG2         | 1.455  | 0      |
| CTAGE1        | 4.315  | 0.04   |
| CTAGE3        | 2.864  | 0      |
| CTAGE5        | 5.523  | 1.98   |
| CTAGE6        | 5.866  | 0.16   |
| CTAGEP        | 2.473  | 0.14   |
| CTB-1048E9.5  | 1.292  | 25.3   |
| CTBP1         | 2.688  | 63.93  |
| CTBP2         | 4.185  | 16.39  |
| CTBS          | 1.618  | 4.53   |
| CTCF          | 3.787  | 27.45  |
| CTCFL         | 3.456  | 0      |
| CTD-2090I13.4 | 0.309  | 16.36  |
| CTDP1         | 4.606  | 10.97  |
| CTDSP1        | 2.74   | 48.08  |
| CTDSP2        | 5.02   | 53.11  |
| CTDSPL        | 4.455  | 38.2   |
| CTDSPL2       | 3.016  | 4.42   |
| CTF1          | 1.664  | 5.27   |
| CTF2P         | 18.229 | 0.3    |

|          |         |        |
|----------|---------|--------|
| CTF8     | 4.933   | 37.5   |
| CTF8P    | 2.737   | 1.2    |
| CTGF     | 2.286   | 122.78 |
| CTGLF1   | 2.42    | 0      |
| CTGLF10P | 26.47   | 0.01   |
| CTGLF11P | 28.489  | 0      |
| CTGLF2   | 7.113   | 0.07   |
| CTGLF4   | 27.04   | 0      |
| CTGLF5   | 149.506 | 0.03   |
| CTGLF6   | 3.817   | 0.13   |
| CTGLF7   | 55.553  | 0.01   |
| CTGLF8P  | 2.631   | 0      |
| CTGLF9P  | 12.324  | 0.02   |
| CTH      | 1.805   | 0.28   |
| CTHRC1   | 1.22    | 54.82  |
| CTLA4    | 3.23    | 0.37   |
| CTNNA1   | 3.761   | 39.02  |
| CTNNA2   | 3.842   | 0      |
| CTNNA3   | 3.02    | 0      |
| CTNNAL1  | 2.445   | 5.1    |
| CTNNAP1  | 3.42    | 3.57   |
| CTNNB1   | 3.657   | 34.07  |
| CTNNBIP1 | 2.995   | 16.48  |
| CTNNBL1  | 1.888   | 24.89  |
| CTNND1   | 6.232   | 16.62  |
| CTNND2   | 5.436   | 0.02   |
| CTNS     | 3.883   | 31.48  |
| CTPS     | 2.756   | 44.41  |
| CTPS2    | 4.151   | 3.04   |
| CTR9     | 4.317   | 11.82  |
| CTRB1    | 0.844   | 0      |
| CTRB2    | 0.858   | 0      |
| CTRC     | 0.899   | 0.09   |
| CTRL     | 1.169   | 0.65   |
| CTSA     | 1.814   | 43.28  |
| CTSB     | 4.064   | 77.06  |
| CTSC     | 7.619   | 25.94  |
| CTSD     | 2.12    | 82.96  |
| CTSE     | 3.312   | 0.2    |
| CTSF     | 2.014   | 8.83   |
| CTSG     | 0.924   | 14.5   |
| CTSH     | 1.525   | 1.55   |
| CTSK     | 1.702   | 0.35   |
| CTSL1    | 1.821   | 0.6    |
| CTSL2    | 1.496   | 0      |
| CTSL2    | 16.299  | 0      |
| CTSL3    | 3.168   | 0      |
| CTSO     | 2.933   | 6.66   |
| CTSS     | 4.1     | 19.07  |
| CTSW     | 1.294   | 16.08  |

|           |        |        |
|-----------|--------|--------|
| CTSZ      | 1.495  | 39.72  |
| CTTN      | 4.662  | 0.67   |
| CTTNBP2   | 11.94  | 0      |
| CTTNBP2NL | 4.27   | 2.15   |
| CTXN1     | 1.238  | 0.14   |
| CTXN3     | 0.246  | 0      |
| CUBN      | 11.344 | 0.12   |
| CUEDC1    | 3.418  | 13.23  |
| CUEDC2    | 1.122  | 50.9   |
| CUGBP1    | 5.806  | 13.17  |
| CUGBP2    | 12.241 | 15.99  |
| CUL1      | 6.418  | 12.06  |
| CUL2      | 2.889  | 5.4    |
| CUL3      | 6.788  | 9.94   |
| CUL4A     | 3.988  | 12.48  |
| CUL4B     | 3.408  | 4.84   |
| CUL5      | 6.387  | 2.27   |
| CUL7      | 5.471  | 7.71   |
| CUTA      | 2.871  | 30.84  |
| CUTC      | 1.318  | 8.24   |
| CUTL1     | 15.472 | 7.21   |
| CUTL2     | 6.841  | 1.84   |
| CUZD1     | 2.897  | 0      |
| CWF19L1   | 2.633  | 4.93   |
| CWF19L2   | 2.92   | 3.2    |
| CX3CL1    | 3.273  | 0.05   |
| CX3CR1    | 3.108  | 4.15   |
| CX40.1    | 1.58   | 0      |
| CX62      | 1.632  | 0      |
| CXADR     | 2.482  | 0      |
| CXCL1     | 1.103  | 0.08   |
| CXCL10    | 1.173  | 0      |
| CXCL11    | 1.489  | 0      |
| CXCL12    | 5.32   | 0.87   |
| CXCL13    | 1.201  | 0      |
| CXCL14    | 1.969  | 0.21   |
| CXCL16    | 2.211  | 3.88   |
| CXCL2     | 1.116  | 0      |
| CXCL3     | 1.159  | 0      |
| CXCL5     | 2.458  | 0.03   |
| CXCL6     | 1.519  | 0      |
| CXCL9     | 2.545  | 0.07   |
| CXCR3     | 1.624  | 23.7   |
| CXCR4     | 3.049  | 180.43 |
| CXCR6     | 1.953  | 0.13   |
| CXCR7     | 2.034  | 0.04   |
| CXorf1    | 2.447  | 0      |
| CXorf12   | 1.411  | 6.63   |
| CXorf15   | 2.299  | 4.61   |
| CXorf2    | 1.525  | 0      |



|          |       |        |
|----------|-------|--------|
| CXorf20  | 4.611 | 0      |
| CXorf21  | 1.808 | 23.11  |
| CXorf22  | 3.606 | 0      |
| CXorf23  | 2.799 | 1.5    |
| CXorf26  | 1.195 | 13.67  |
| CXorf27  | 0.427 | 0      |
| CXorf31  | 0.522 | 0.48   |
| CXorf34  | 3.325 | 5.14   |
| CXorf36  | 2.501 | 0      |
| CXorf38  | 1.563 | 3.29   |
| CXorf39  | 3.001 | 3.17   |
| CXorf40A | 1.366 | 8.26   |
| CXorf40B | 1.34  | 10.43  |
| CXorf41  | 1.652 | 0      |
| CXorf42  | 0.366 | 1.84   |
| CXorf43  | 2.87  | 0      |
| CXorf45  | 2.052 | 6.44   |
| CXorf48  | 2.907 | 0      |
| CXorf50  | 1.95  | 0.04   |
| CXorf55  | 2.46  | 0      |
| CXorf56  | 0.904 | 9.41   |
| CXorf57  | 3.81  | 0.04   |
| CXorf58  | 1.547 | 0      |
| CXorf59  | 1.956 | 0      |
| CXorf6   | 4.598 | 0.92   |
| CXorf9   | 2.626 | 116.25 |
| CXXC1    | 2.444 | 31.57  |
| CXXC4    | 0.761 | 0      |
| CXXC5    | 2.589 | 23.68  |
| CXXC6    | 8.497 | 0.1    |
| CXYorf11 | 2.303 | 0      |
| CXYorf2  | 0.902 | 5.42   |
| CXYorf3  | 3.21  | 22.31  |
| CYB561   | 3.539 | 5.55   |
| CYB561D1 | 3.512 | 3.07   |
| CYB561D2 | 1.204 | 10.08  |
| CYB5A    | 1.206 | 19.98  |
| CYB5B    | 4.286 | 10.42  |
| CYB5D1   | 3.497 | 4.6    |
| CYB5D2   | 1.91  | 3.75   |
| CYB5P3   | 0.398 | 5.92   |
| CYB5P4   | 0.399 | 0.64   |
| CYB5R1   | 1.643 | 13.69  |
| CYB5R2   | 1.341 | 0      |
| CYB5R3   | 2.209 | 100.52 |
| CYB5R4   | 2.247 | 1.76   |
| CYBA     | 0.688 | 330.94 |
| CYBASC3  | 2.959 | 31.69  |
| CYBB     | 4.268 | 21.69  |
| CYBRD1   | 4.236 | 3.44   |

|         |        |       |
|---------|--------|-------|
| CYC1    | 1.171  | 56.4  |
| CYCS    | 11.017 | 2.2   |
| CYCSL1  | 0.633  | 0.27  |
| CYCSP1  | 0.315  | 0     |
| CYCSP10 | 0.308  | 0     |
| CYCSP11 | 0.315  | 0     |
| CYCSP12 | 0.304  | 0     |
| CYCSP14 | 0.297  | 0     |
| CYCSP16 | 0.171  | 0     |
| CYCSP17 | 0.315  | 0     |
| CYCSP18 | 0.472  | 0     |
| CYCSP19 | 0.634  | 0     |
| CYCSP2  | 0.313  | 0     |
| CYCSP20 | 0.63   | 0     |
| CYCSP22 | 0.313  | 0     |
| CYCSP23 | 0.319  | 0     |
| CYCSP24 | 0.316  | 0     |
| CYCSP25 | 0.32   | 0     |
| CYCSP26 | 0.325  | 0     |
| CYCSP27 | 0.298  | 0     |
| CYCSP28 | 0.326  | 0     |
| CYCSP29 | 0.318  | 0     |
| CYCSP3  | 0.318  | 10.33 |
| CYCSP30 | 3.768  | 0     |
| CYCSP32 | 0.318  | 0     |
| CYCSP33 | 0.318  | 0     |
| CYCSP34 | 0.313  | 1.88  |
| CYCSP35 | 0.313  | 0     |
| CYCSP38 | 0.274  | 0     |
| CYCSP39 | 0.309  | 0     |
| CYCSP4  | 0.277  | 0     |
| CYCSP40 | 0.243  | 0     |
| CYCSP41 | 0.193  | 0     |
| CYCSP42 | 0.259  | 0.98  |
| CYCSP43 | 0.312  | 0     |
| CYCSP44 | 0.32   | 0     |
| CYCSP45 | 0.318  | 6.89  |
| CYCSP46 | 1.061  | 0.08  |
| CYCSP48 | 0.277  | 0     |
| CYCSP5  | 0.298  | 0     |
| CYCSP51 | 0.318  | 5.03  |
| CYCSP52 | 0.31   | 0     |
| CYCSP53 | 0.28   | 0     |
| CYCSP6  | 0.311  | 0     |
| CYCSP7  | 0.304  | 0.28  |
| CYCSP8  | 0.312  | 0     |
| CYFIP1  | 5.266  | 33.75 |
| CYFIP2  | 7.137  | 7.28  |
| CYGB    | 1.951  | 64.55 |
| CYHR1   | 1.19   | 15.5  |

|          |         |      |
|----------|---------|------|
| CYLC1    | 2.268   | 0    |
| CYLC2    | 2.101   | 0    |
| CYLD     | 5.371   | 7.9  |
| CYorf14  | 1.495   | 0.23 |
| CYorf15A | 1.97    | 9.83 |
| CYorf15B | 5.52    | 2.32 |
| CYorf16  | 0.467   | 0    |
| CYP11A1  | 1.816   | 0    |
| CYP11B1  | 3.535   | 0    |
| CYP11B2  | 2.936   | 0    |
| CYP17A1  | 1.87    | 0    |
| CYP19A1  | 3.098   | 0    |
| CYP1A1   | 2.601   | 0    |
| CYP1A2   | 3.127   | 0    |
| CYP1B1   | 5.122   | 0.07 |
| CYP20A1  | 2.687   | 1.73 |
| CYP21A1P | 4.043   | 0.02 |
| CYP21A2  | 6.342   | 0.01 |
| CYP24A1  | 3.274   | 0    |
| CYP26A1  | 2.684   | 0.22 |
| CYP26B1  | 4.528   | 0    |
| CYP26C1  | 1.569   | 0.21 |
| CYP27A1  | 2.059   | 0    |
| CYP27B1  | 2.487   | 0.07 |
| CYP2A13  | 1.747   | 0    |
| CYP2A6   | 1.751   | 0.1  |
| CYP2A7   | 2.471   | 0    |
| CYP2A7P1 | 119.855 | 0    |
| CYP2B6   | 3.052   | 0    |
| CYP2B7P1 | 29.298  | 0.01 |
| CYP2C18  | 1.995   | 0    |
| CYP2C19  | 1.473   | 0    |
| CYP2C8   | 1.852   | 0.09 |
| CYP2C9   | 1.835   | 0    |
| CYP2D6   | 1.659   | 0.87 |
| CYP2D7P1 | 6.042   | 0.48 |
| CYP2D8P1 | 5.322   | 0.11 |
| CYP2E1   | 1.667   | 0.86 |
| CYP2F1   | 1.826   | 0    |
| CYP2F1P  | 8.097   | 0    |
| CYP2G1P  | 8.934   | 0.01 |
| CYP2G2P  | 11.993  | 0    |
| CYP2J2   | 1.857   | 0    |
| CYP2R1   | 1.619   | 1.35 |
| CYP2S1   | 2.621   | 0.09 |
| CYP2T2P  | 2.898   | 0.08 |
| CYP2T3P  | 2.635   | 0    |
| CYP2U1   | 4.752   | 0.48 |
| CYP2W1   | 4.608   | 0.4  |
| CYP39A1  | 2.272   | 0    |

|           |        |       |
|-----------|--------|-------|
| CYP3A     | 0.1    | 0     |
| CYP3A4    | 5.536  | 0     |
| CYP3A43   | 5.95   | 0.57  |
| CYP3A5    | 3.414  | 0.05  |
| CYP3A5P1  | 30.198 | 0     |
| CYP3A5P2  | 8.486  | 0.03  |
| CYP3A7    | 4.16   | 0.04  |
| CYP46A1   | 2.077  | 0     |
| CYP4A11   | 2.813  | 0     |
| CYP4A22   | 1.668  | 0     |
| CYP4B1    | 2.147  | 0     |
| CYP4F11   | 3.044  | 0     |
| CYP4F12   | 1.693  | 0.05  |
| CYP4F2    | 2.36   | 0     |
| CYP4F3    | 5.052  | 0.03  |
| CYP4F3LP  | 0.998  | 0.34  |
| CYP4F8    | 1.846  | 0     |
| CYP4V2    | 4.699  | 4.27  |
| CYP4X1    | 2.357  | 0     |
| CYP4Z1    | 1.907  | 0     |
| CYP4Z2P   | 44.85  | 0     |
| CYP51A1   | 6.75   | 1.51  |
| CYP51P1   | 1.939  | 0.78  |
| CYP51P2   | 0.134  | 0     |
| CYP7A1    | 2.875  | 0.03  |
| CYP7B1    | 2.232  | 0     |
| CYP8B1    | 3.95   | 0.04  |
| CYR61     | 2.019  | 0     |
| CYS1      | 0.779  | 0     |
| CYSLTR1   | 1.985  | 13.92 |
| CYSLTR2   | 2.548  | 0.33  |
| CYTB      | 1.135  | 0     |
| CYTL1     | 1.001  | 51.5  |
| CYYR1     | 3.079  | 0.08  |
| D15Wsu75e | 1.524  | 8.96  |
| D21S2056E | 2.985  | 11.82 |
| D2HGDH    | 2.893  | 6.81  |
| D4S234E   | 5.135  | 0     |
| D4ST1     | 2.142  | 15.1  |
| D6S2723E  | 1.035  | 0     |
| DAAM1     | 4.639  | 5.06  |
| DAAM2     | 6.215  | 1.62  |
| DAB1      | 2.58   | 0     |
| DAB2      | 3.546  | 10.1  |
| DAB2IP    | 5.906  | 2.88  |
| DACH1     | 5.239  | 0.02  |
| DACH2     | 2.232  | 0     |
| DACT1     | 3.76   | 0.4   |
| DACT2     | 2.942  | 0     |
| DACT3     | 2.526  | 0.83  |

|         |       |        |
|---------|-------|--------|
| DAD1    | 0.683 | 85.47  |
| DAG1    | 5.492 | 2.56   |
| DAGLA   | 5.752 | 0.89   |
| DAGLB   | 6.022 | 22.56  |
| DAK     | 4.241 | 6.77   |
| DALRD3  | 2.684 | 15     |
| DAND5   | 1.732 | 0.09   |
| DAO     | 1.573 | 0.05   |
| DAOA    | 0.742 | 0      |
| DAP     | 2.23  | 46.01  |
| DAP3    | 2.028 | 41.87  |
| DAPK1   | 5.938 | 0.84   |
| DAPK2   | 2.628 | 0.35   |
| DAPK3   | 2.105 | 14.96  |
| DAPP1   | 2.955 | 0.77   |
| DARC    | 1.301 | 0.45   |
| DARS    | 2.322 | 20.9   |
| DARS2   | 3.187 | 4.78   |
| DAXX    | 7.41  | 0      |
| DAZ1    | 3.836 | 0      |
| DAZ2    | 5.875 | 0      |
| DAZ3    | 3.391 | 0      |
| DAZ4    | 4.031 | 0      |
| DAZAP1  | 3.222 | 43.11  |
| DAZAP2  | 1.898 | 129.02 |
| DAZL    | 3.05  | 0      |
| DBC1    | 3.158 | 0      |
| DBF4    | 7.814 | 0.66   |
| DBF4B   | 4.989 | 0.98   |
| DBH     | 2.76  | 0.03   |
| DBI     | 0.7   | 60.65  |
| DBIL1   | 0.47  | 0      |
| DBIL2   | 0.547 | 17.25  |
| DBN1    | 3.615 | 51.08  |
| DBNDD1  | 2.075 | 12.59  |
| DBNDD2  | 4.302 | 6.13   |
| DBNL    | 4.354 | 27.46  |
| DBP     | 1.467 | 6.89   |
| DBR1    | 2.65  | 2.83   |
| DBT     | 3.538 | 0.76   |
| DBX1    | 1.149 | 0      |
| DBX2    | 2.722 | 0      |
| DC2     | 1.08  | 48.36  |
| DCAKD   | 2.03  | 21.54  |
| DCAL1   | 0.635 | 2.52   |
| DCAMKL1 | 5.703 | 0.02   |
| DCAMKL2 | 3.657 | 0.03   |
| DCAMKL3 | 5.747 | 0      |
| DCBLD1  | 2.529 | 2.93   |
| DCBLD2  | 6.093 | 0.2    |

|          |        |       |
|----------|--------|-------|
| DCC      | 4.609  | 0     |
| DCC1     | 2.213  | 1.37  |
| DCD      | 0.517  | 0     |
| DCDC1    | 1.706  | 0     |
| DCDC2    | 4.604  | 0     |
| DCDC2B   | 1.05   | 0.16  |
| DCDC5    | 4.741  | 0     |
| DCHS1    | 10.756 | 4.32  |
| DCHS2    | 11.84  | 0     |
| DCI      | 1.029  | 23    |
| DCK      | 2.462  | 18.75 |
| DCLRE1A  | 4.216  | 0.62  |
| DCLRE1B  | 3.651  | 2.56  |
| DCLRE1C  | 4.418  | 3.45  |
| DCN      | 3.504  | 0.34  |
| DCP1A    | 2.054  | 5.01  |
| DCP1B    | 2.092  | 6.6   |
| DCP2     | 8.947  | 3.98  |
| DCPS     | 1.479  | 8.32  |
| DCST1    | 2.279  | 0.22  |
| DCST2    | 2.485  | 0.07  |
| DCT      | 2.291  | 0.03  |
| DCTD     | 2.324  | 24.32 |
| DCTN1    | 5.011  | 41.23 |
| DCTN2    | 1.731  | 45.26 |
| DCTN3    | 1.305  | 19.37 |
| DCTN4    | 3.806  | 32.58 |
| DCTN5    | 3.323  | 12.93 |
| DCTN6    | 1.031  | 8.41  |
| DCUN1D1  | 3.152  | 2.73  |
| DCUN1D2  | 5.471  | 1.99  |
| DCUN1D3  | 2.967  | 0.68  |
| DCUN1D4  | 4.265  | 1.3   |
| DCUN1D5  | 1.249  | 11.8  |
| DCX      | 10.08  | 0     |
| DCXR     | 1.134  | 29.64 |
| DDAH1    | 3.92   | 0     |
| DDAH2    | 3.993  | 0.02  |
| DDB1     | 4.217  | 51    |
| DDB2     | 1.822  | 17.52 |
| DDC      | 4.159  | 1.46  |
| DDEF1    | 6.042  | 10.15 |
| DDEF1IT1 | 1.179  | 0     |
| DDEF2    | 5.711  | 3.99  |
| DDEFL1   | 4.05   | 1.19  |
| DDHD1    | 3.548  | 2.37  |
| DDHD2    | 3.31   | 3.23  |
| DDI1     | 2.589  | 0     |
| DDI2     | 1.759  | 1.78  |
| DDIT3    | 0.911  | 8.41  |

|         |        |        |
|---------|--------|--------|
| DDIT4   | 1.752  | 227.13 |
| DDIT4L  | 2.592  | 0      |
| DDN     | 3.744  | 0.09   |
| DDO     | 1.709  | 3.45   |
| DDOST   | 2.023  | 100.1  |
| DDPP    | 0.295  | 2.85   |
| DDR1    | 12.999 | 0.27   |
| DDR2    | 3.252  | 0      |
| DDT     | 0.666  | 59.95  |
| DDX1    | 2.706  | 21.54  |
| DDX10   | 3.193  | 8.39   |
| DDX11   | 4.048  | 11.87  |
| DDX12   | 4.417  | 1.74   |
| DDX17   | 7.237  | 70.64  |
| DDX18   | 3.765  | 10.77  |
| DDX18P1 | 2.373  | 0.63   |
| DDX19A  | 2.903  | 11.09  |
| DDX19B  | 2.094  | 7.04   |
| DDX20   | 3.446  | 2.96   |
| DDX21   | 4.252  | 21.53  |
| DDX23   | 3.267  | 30.14  |
| DDX24   | 2.948  | 39.46  |
| DDX25   | 1.691  | 0      |
| DDX26B  | 3.793  | 3.04   |
| DDX27   | 2.643  | 25.53  |
| DDX28   | 2.786  | 5.44   |
| DDX31   | 3.786  | 3.71   |
| DDX39   | 2.354  | 29.74  |
| DDX3X   | 5.399  | 31.3   |
| DDX3Y   | 4.41   | 11.9   |
| DDX4    | 2.428  | 0      |
| DDX41   | 2.104  | 40.64  |
| DDX42   | 3.993  | 35.32  |
| DDX43   | 2.291  | 0.03   |
| DDX46   | 5.679  | 11.7   |
| DDX47   | 1.817  | 21.41  |
| DDX49   | 1.82   | 32.9   |
| DDX5    | 3.656  | 194.28 |
| DDX50   | 2.538  | 12.38  |
| DDX51   | 2.802  | 6.61   |
| DDX52   | 4.137  | 3.24   |
| DDX53   | 2.12   | 0      |
| DDX54   | 4.378  | 29.21  |
| DDX55   | 2.622  | 7.1    |
| DDX56   | 4.969  | 10.34  |
| DDX58   | 4.756  | 0.76   |
| DDX59   | 3.525  | 5.5    |
| DDX6    | 5.378  | 22.92  |
| DEADC1  | 3.548  | 2.18   |
| DEAF1   | 2.716  | 52.98  |

|           |        |       |
|-----------|--------|-------|
| DEC1      | 1.251  | 0     |
| DECR1     | 1.251  | 20.2  |
| DECR2     | 1.583  | 5.53  |
| DEDD      | 2.438  | 13.3  |
| DEDD2     | 1.887  | 24.37 |
| DEF6      | 2.296  | 28.88 |
| DEFA1     | 0.486  | 15.08 |
| DEFA3     | 0.487  | 8.3   |
| DEFA4     | 0.542  | 24.86 |
| DEFA5     | 0.449  | 0     |
| DEFA6     | 0.465  | 0     |
| DEFA8P    | 4.58   | 0.08  |
| DEFB1     | 0.463  | 0     |
| DEFB103A  | 0.518  | 0     |
| DEFB104A  | 0.281  | 0     |
| DEFB104B  | 0.281  | 0     |
| DEFB105A  | 0.237  | 0     |
| DEFB105B  | 0.237  | 0     |
| DEFB106A  | 0.303  | 0     |
| DEFB106B  | 0.303  | 0     |
| DEFB107A  | 0.389  | 0     |
| DEFB107B  | 0.389  | 0     |
| DEFB108B  | 0.222  | 0     |
| DEFB108P1 | 2.993  | 0     |
| DEFB109   | 0.264  | 0     |
| DEFB110   | 0.189  | 0     |
| DEFB111   | 0.384  | 0     |
| DEFB112   | 0.342  | 0     |
| DEFB113   | 0.249  | 0     |
| DEFB114   | 0.21   | 0     |
| DEFB115   | 0.267  | 0     |
| DEFB116   | 0.309  | 0     |
| DEFB118   | 0.589  | 0     |
| DEFB119   | 1.036  | 0     |
| DEFB121   | 0.282  | 0     |
| DEFB122   | 14.448 | 0.01  |
| DEFB123   | 0.378  | 0     |
| DEFB124   | 0.216  | 0     |
| DEFB125   | 0.709  | 0     |
| DEFB126   | 0.413  | 0     |
| DEFB127   | 0.439  | 0     |
| DEFB128   | 0.282  | 0     |
| DEFB129   | 0.672  | 0     |
| DEFB130   | 0.24   | 0     |
| DEFB131   | 0.213  | 0     |
| DEFB134   | 0.201  | 0     |
| DEFB136   | 0.198  | 0     |
| DEFB137   | 0.221  | 0     |
| DEFB4     | 0.336  | 0     |
| DEGS1     | 2.632  | 8.54  |



|           |       |       |
|-----------|-------|-------|
| DEGS2     | 1.349 | 1.12  |
| DEK       | 2.831 | 19.28 |
| deltaNEMO | 8.886 | 1.9   |
| DENND1A   | 5.363 | 4.15  |
| DENND1B   | 2.197 | 0.27  |
| DENND1C   | 2.795 | 1.23  |
| DENND2A   | 7.47  | 0.01  |
| DENND2C   | 4.685 | 0.14  |
| DENND2D   | 2.042 | 12.25 |
| DENND3    | 6.933 | 48.82 |
| DENND4A   | 6.585 | 2.49  |
| DENND4B   | 5.923 | 23.17 |
| DENND4C   | 5.363 | 3.02  |
| DENR      | 3.061 | 18.19 |
| DEPDC1    | 3.286 | 1.2   |
| DEPDC1B   | 2.467 | 1.3   |
| DEPDC2    | 5.414 | 0     |
| DEPDC4    | 1.155 | 0.14  |
| DEPDC5    | 5.952 | 1.5   |
| DEPDC6    | 2.167 | 0.7   |
| DEPDC7    | 1.994 | 0     |
| DERA      | 1.528 | 11.52 |
| DERL1     | 3.034 | 16.8  |
| DERL2     | 1.127 | 15.77 |
| DERL3     | 5.753 | 2.98  |
| DES       | 2.248 | 0     |
| DET1      | 2.315 | 2.66  |
| DEXI      | 1.827 | 24.76 |
| DFFA      | 5.807 | 8.27  |
| DFFB      | 5.528 | 1.4   |
| DFNA5     | 4.436 | 42.21 |
| DFNB31    | 4.022 | 0.17  |
| DGAT1     | 1.969 | 26.27 |
| DGAT2     | 2.42  | 0.48  |
| DGAT2L3   | 0.987 | 0     |
| DGAT2L4   | 2.124 | 0     |
| DGAT2L6   | 1.708 | 0     |
| DGAT2L7   | 1.5   | 0     |
| DGCR14    | 1.697 | 9.83  |
| DGCR2     | 4.418 | 14.81 |
| DGCR5     | 5.427 | 0     |
| DGCR6     | 1.171 | 3.88  |
| DGCR6L    | 1.159 | 40.49 |
| DGCR8     | 4.441 | 8.71  |
| DGKA      | 3.151 | 21.14 |
| DGKB      | 9.706 | 0     |
| DGKD      | 6.508 | 11.42 |
| DGKE      | 2.562 | 0.79  |
| DGKG      | 3.76  | 0.07  |
| DGKH      | 4.902 | 0.47  |

|         |        |       |
|---------|--------|-------|
| DGKI    | 9.56   | 0     |
| DGKK    | 3.917  | 0     |
| DGKQ    | 4.636  | 5.85  |
| DGKZ    | 4.111  | 19.04 |
| DGUOK   | 1.144  | 22.97 |
| DHCR24  | 4.27   | 0.02  |
| DHCR7   | 2.584  | 5.77  |
| DHDDS   | 3.538  | 6.52  |
| DHDH    | 1.084  | 0.08  |
| DHFR    | 3.917  | 11.74 |
| DHFRL1  | 3.756  | 1.19  |
| DHFRP1  | 0.967  | 0     |
| DHH     | 1.936  | 0     |
| DHODH   | 3.132  | 3.84  |
| DHPS    | 1.476  | 27.85 |
| DHRS1   | 1.47   | 7.22  |
| DHRS12  | 2.989  | 3.58  |
| DHRS13  | 1.908  | 9.41  |
| DHRS2   | 2.311  | 0     |
| DHRS3   | 2.269  | 52.83 |
| DHRS4   | 1.278  | 20.3  |
| DHRS4L2 | 1.269  | 10.75 |
| DHRS7   | 1.282  | 10.25 |
| DHRS7B  | 1.375  | 3.86  |
| DHRS7C  | 0.978  | 0     |
| DHRS9   | 3.362  | 1.13  |
| DHRSX   | 2.537  | 5.51  |
| DHTKD1  | 5.159  | 6.3   |
| DHX15   | 3.199  | 27.18 |
| DHX16   | 10.131 | 0.1   |
| DHX29   | 4.473  | 3.77  |
| DHX30   | 4.675  | 22.21 |
| DHX32   | 3.07   | 2.52  |
| DHX33   | 4.076  | 4.07  |
| DHX34   | 5.17   | 5.04  |
| DHX35   | 3.301  | 2.45  |
| DHX36   | 3.601  | 4.56  |
| DHX37   | 4.549  | 9.94  |
| DHX38   | 4.454  | 16.72 |
| DHX40   | 3.656  | 9.33  |
| DHX40P  | 39.226 | 0.03  |
| DHX57   | 4.83   | 3.1   |
| DHX8    | 4.2    | 14.38 |
| DHX9    | 4.198  | 47.05 |
| DHX9P   | 4.164  | 6.82  |
| DIABLO  | 1.669  | 22.1  |
| DIAPH1  | 5.602  | 55.04 |
| DIAPH2  | 9.477  | 0.82  |
| DIAPH3  | 2.691  | 0.54  |
| DICER1  | 10.413 | 1.92  |

|               |        |       |
|---------------|--------|-------|
| DIDO1         | 13.643 | 6.19  |
| DIMT1L        | 1.809  | 13.18 |
| DIO1          | 3.161  | 0.08  |
| DIO2          | 7.233  | 0     |
| DIO3          | 2.1    | 0.08  |
| DIO3OS        | 3.454  | 0     |
| DIP           | 4.316  | 10.64 |
| DIP2A         | 6.995  | 2.46  |
| DIP2B         | 8.715  | 5.5   |
| DIP2C         | 7.106  | 4.99  |
| DIRAS1        | 3.377  | 7.53  |
| DIRAS2        | 4.107  | 0.02  |
| DIRAS3        | 1.631  | 0.1   |
| DIRC1         | 1.454  | 0     |
| DIRC2         | 2.106  | 0.84  |
| DIS3          | 7.306  | 3.47  |
| DIS3L         | 3.658  | 7.44  |
| DIS3L2        | 3.107  | 7.35  |
| DISC1         | 8.98   | 1.55  |
| DISC2         | 3.892  | 0.03  |
| DISP1         | 4.743  | 0.88  |
| DISP2         | 5.032  | 0.5   |
| DIXDC1        | 6.106  | 0.05  |
| dJ222E13.2    | 11.1   | 0.84  |
| dJ341D10.1    | 2.11   | 0.04  |
| dJ507I15.1    | 0.773  | 2.84  |
| dJ612B15.1    | 11.417 | 0.1   |
| DKC1          | 2.454  | 33.81 |
| DKFZp313A2432 | 5.235  | 2.64  |
| DKFZP434A0131 | 3.886  | 0.5   |
| DKFZP434B0335 | 9.957  | 4.5   |
| DKFZP434B061  | 0.997  | 0     |
| DKFZp434B1231 | 3.926  | 0     |
| DKFZp434E1119 | 0.761  | 0.33  |
| DKFZP434I0714 | 3.505  | 1.49  |
| DKFZp434K1815 | 4.396  | 4.35  |
| DKFZp434K191  | 4.835  | 0     |
| DKFZp434N035  | 1.958  | 0.04  |
| DKFZP434O047  | 0.67   | 0     |
| DKFZP434P211  | 2.459  | 0     |
| DKFZp451A211  | 6.338  | 3.29  |
| DKFZp547H025  | 1.844  | 0     |
| DKFZP547L112  | 1.236  | 0     |
| DKFZP564C196  | 2.242  | 0.42  |
| DKFZP564J0863 | 2.623  | 5.74  |
| DKFZP564J102  | 2.244  | 0.03  |
| DKFZp564N2472 | 2.54   | 0     |
| DKFZP564O0523 | 3.434  | 1.57  |
| DKFZP564O0823 | 5.039  | 0.02  |
| DKFZP586H2123 | 2.787  | 0     |

|                |        |       |
|----------------|--------|-------|
| DKFZp586I1420  | 5.52   | 3.1   |
| DKFZP586P0123  | 6.036  | 1.74  |
| DKFZp666G057   | 3.131  | 0.03  |
| DKFZp667G2110  | 4.785  | 3.01  |
| DKFZp667M2411  | 1.873  | 5.03  |
| DKFZP686A01247 | 5.114  | 0     |
| DKFZp686A1627  | 76.726 | 0     |
| DKFZP686C2281  | 3.93   | 0.03  |
| DKFZp686D0972  | 2.793  | 0.03  |
| DKFZP686E2158  | 0.602  | 16.65 |
| DKFZp686I15217 | 2.469  | 0.68  |
| DKFZp686J0529  | 2.236  | 0     |
| DKFZp686K16132 | 2.861  | 4.24  |
| DKFZP686M0199  | 2.735  | 0     |
| DKFZp686O24166 | 6.382  | 0.03  |
| DKFZp761B107   | 5.585  | 0.03  |
| DKFZp761E198   | 4.17   | 1.98  |
| DKFZp761P0423  | 4.881  | 12.53 |
| DKFZp762E1312  | 3.05   | 6.27  |
| DKFZp779B1540  | 3.732  | 0     |
| DKFZp779B1634  | 2.754  | 0     |
| DKFZP779L1853  | 3.708  | 0     |
| DKFZp779O175   | 1.692  | 0.15  |
| DKFZP781G0119  | 5.13   | 0.02  |
| DKFZp781N1041  | 1.407  | 0     |
| DKK1           | 1.805  | 1.16  |
| DKK2           | 3.637  | 0     |
| DKK3           | 3.016  | 0     |
| DKK4           | 0.818  | 0     |
| DKKL1          | 1.031  | 0     |
| DKKL2          | 0.698  | 0     |
| DLAT           | 3.3    | 6.53  |
| DLC1           | 8.019  | 0.05  |
| DLD            | 7.158  | 4.53  |
| DLEC1          | 6.063  | 0     |
| DLEU1          | 0.874  | 5.88  |
| DLEU2          | 2.768  | 0.85  |
| DLEU2L         | 1.657  | 0.25  |
| DLEU7          | 2.092  | 0     |
| DLG1           | 3.043  | 4.16  |
| DLG2           | 7.724  | 0     |
| DLG3           | 3.101  | 0.93  |
| DLG4           | 3.984  | 12.77 |
| DLG5           | 7.101  | 2.1   |
| DLG7           | 2.979  | 5.43  |
| DLGAP1         | 3.417  | 0     |
| DLGAP2         | 10.095 | 0     |
| DLGAP3         | 3.587  | 0.31  |
| DLGAP4         | 5.829  | 9.94  |
| DLK1           | 2.48   | 0     |

|        |        |       |
|--------|--------|-------|
| DLL1   | 3.077  | 1.32  |
| DLL3   | 2.644  | 10.22 |
| DLL4   | 3.383  | 1.32  |
| DLST   | 2.813  | 32.25 |
| DLSTP  | 3.01   | 7.72  |
| DLX1   | 4.055  | 0.23  |
| DLX2   | 2.304  | 0.03  |
| DLX3   | 2.602  | 0     |
| DLX4   | 2.16   | 0.08  |
| DLX5   | 2.848  | 0.03  |
| DLX6   | 3.582  | 0     |
| DMAP1  | 1.891  | 27.84 |
| DMBT1  | 7.686  | 0     |
| DMBX1  | 3.229  | 0     |
| DMC1   | 2.269  | 0.41  |
| DMD    | 19.358 | 0     |
| DMGDH  | 3.083  | 0     |
| DMKN   | 2.014  | 0     |
| DMN    | 10.098 | 0.35  |
| DMP1   | 2.676  | 0     |
| DMPK   | 2.742  | 2.55  |
| DMRT1  | 2.222  | 0     |
| DMRT2  | 3.796  | 0     |
| DMRT3  | 2.184  | 0     |
| DMRTA1 | 2.302  | 0     |
| DMRTA2 | 2.744  | 0     |
| DMRTB1 | 1.907  | 0     |
| DMRTC1 | 1.044  | 0     |
| DMRTC2 | 1.821  | 0     |
| DMTF1  | 7.968  | 4.42  |
| DMWD   | 3.308  | 5.6   |
| DMXL1  | 11.072 | 1.45  |
| DMXL2  | 9.61   | 0.88  |
| DNA2L  | 4.416  | 0.93  |
| DNAH1  | 13.115 | 1.14  |
| DNAH10 | 3.422  | 0     |
| DNAH11 | 28.381 | 0.16  |
| DNAH17 | 4.791  | 0.39  |
| DNAH2  | 13.505 | 0     |
| DNAH3  | 12.524 | 0.31  |
| DNAH5  | 13.971 | 0     |
| DNAH7  | 12.388 | 0     |
| DNAH8  | 13.86  | 0     |
| DNAH9  | 14.381 | 0     |
| DNAHL1 | 1.846  | 0     |
| DNAI1  | 2.521  | 0     |
| DNAI2  | 2.253  | 0     |
| DNAJA1 | 2.218  | 35.78 |
| DNAJA2 | 1.937  | 14.13 |
| DNAJA3 | 2.687  | 14.89 |

|          |       |       |
|----------|-------|-------|
| DNAJA4   | 3.175 | 9.34  |
| DNAJA5   | 6.208 | 4.27  |
| DNAJB1   | 2.233 | 37.65 |
| DNAJB11  | 1.774 | 34.9  |
| DNAJB12  | 6.14  | 7.5   |
| DNAJB13  | 1.875 | 0.67  |
| DNAJB14  | 5.638 | 1.27  |
| DNAJB2   | 4.243 | 7.68  |
| DNAJB4   | 2.431 | 3.32  |
| DNAJB5   | 2.442 | 1.21  |
| DNAJB6   | 6.78  | 15.83 |
| DNAJB7   | 2.578 | 0.23  |
| DNAJB8   | 2.468 | 0     |
| DNAJB9   | 4.742 | 0.54  |
| DNAJC1   | 1.881 | 4.84  |
| DNAJC10  | 4.193 | 7.74  |
| DNAJC11  | 3.197 | 10.72 |
| DNAJC12  | 1.668 | 0.15  |
| DNAJC13  | 7.595 | 4.42  |
| DNAJC14  | 3.246 | 22.34 |
| DNAJC15  | 2.776 | 7.92  |
| DNAJC16  | 6.024 | 1.82  |
| DNAJC17  | 0.993 | 7.72  |
| DNAJC18  | 3.539 | 1.48  |
| DNAJC19  | 2.796 | 2.81  |
| DNAJC3   | 2.076 | 6.58  |
| DNAJC4   | 2.14  | 25.62 |
| DNAJC5   | 5.106 | 25.59 |
| DNAJC5B  | 1.38  | 0     |
| DNAJC5G  | 2.006 | 0     |
| DNAJC6   | 5.75  | 0.04  |
| DNAJC7   | 1.752 | 33.17 |
| DNAJC8   | 1.479 | 63.51 |
| DNAJC8P1 | 1.577 | 10.04 |
| DNAJC9   | 1.437 | 22.16 |
| DNAL1    | 1.166 | 0.58  |
| DNAL4    | 1.487 | 13.37 |
| DNALI1   | 2.649 | 0     |
| DNAPTP6  | 2.336 | 177.6 |
| DNASE1   | 3.098 | 2.67  |
| DNASE1L1 | 3.69  | 5.89  |
| DNASE1L2 | 1.326 | 0.89  |
| DNASE1L3 | 1.463 | 0.64  |
| DNASE2   | 2.01  | 4.19  |
| DNASE2B  | 1.625 | 0     |
| DND1     | 1.603 | 3.73  |
| DNER     | 3.257 | 0     |
| DNHD1    | 3.378 | 1.17  |
| DNHD2    | 2.382 | 0     |
| DNM1     | 3.848 | 2.74  |

|          |        |        |
|----------|--------|--------|
| DNM1L    | 3.695  | 7.07   |
| DNM2     | 3.772  | 63.71  |
| DNM3     | 7.627  | 0      |
| DNMBP    | 5.065  | 3.48   |
| DNMT1    | 5.408  | 20.22  |
| DNMT3A   | 6.077  | 10.23  |
| DNMT3AP1 | 2.748  | 0.06   |
| DNMT3B   | 4.778  | 2.84   |
| DNMT3L   | 1.871  | 0.18   |
| DNPEP    | 1.672  | 24.24  |
| DNTT     | 2.121  | 538.74 |
| DNTTIP1  | 1.29   | 20.63  |
| DNTTIP2  | 2.38   | 19.36  |
| DOC2A    | 2.066  | 3.95   |
| DOC2B    | 2.026  | 0      |
| DOCK1    | 6.642  | 0.01   |
| DOCK10   | 4.274  | 5.89   |
| DOCK11   | 6.626  | 7.33   |
| DOCK2    | 6.05   | 17.04  |
| DOCK3    | 8.706  | 0.06   |
| DOCK4    | 16.672 | 0.03   |
| DOCK5    | 7.555  | 0.03   |
| DOCK6    | 6.356  | 0.12   |
| DOCK7    | 7.052  | 2.72   |
| DOCK8    | 7.233  | 25.48  |
| DOCK9    | 7.523  | 1.55   |
| DOHH     | 1.74   | 8.67   |
| DOK1     | 1.89   | 17.16  |
| DOK2     | 1.77   | 1.28   |
| DOK3     | 2.011  | 30.41  |
| DOK4     | 2.689  | 33.74  |
| DOK5     | 1.833  | 0      |
| DOK6     | 1.96   | 0      |
| DOK7     | 2.549  | 0      |
| DOLK     | 2.204  | 2.56   |
| DOLPP1   | 2.153  | 7.08   |
| DOM3Z    | 4.77   | 0      |
| DONSON   | 2.17   | 2.33   |
| DOPEY1   | 7.899  | 1.16   |
| DOPEY2   | 7.679  | 0.64   |
| DOT1L    | 7.332  | 15.84  |
| DP58     | 3.728  | 0      |
| DPAGT1   | 2.937  | 16.89  |
| DPCR1    | 5.905  | 0      |
| DPEP1    | 1.734  | 70.88  |
| DPEP2    | 1.697  | 1.29   |
| DPEP3    | 1.652  | 0      |
| DPF1     | 1.424  | 0      |
| DPF2     | 2.409  | 37.98  |
| DPF3     | 4.119  | 0.02   |

|            |        |       |
|------------|--------|-------|
| DPH1-OVCA2 | 3.228  | 22.68 |
| DPH2       | 2.497  | 13.9  |
| DPH3       | 0.532  | 5.86  |
| DPH4       | 3      | 1.34  |
| DPH5       | 1.3    | 18.08 |
| DPM1       | 1.047  | 10.05 |
| DPM2       | 0.91   | 40.92 |
| DPM3       | 0.831  | 19.97 |
| DPP10      | 4.581  | 0     |
| DPP3       | 2.692  | 18.5  |
| DPP4       | 3.9    | 2.18  |
| DPP6       | 9      | 0     |
| DPP7       | 1.617  | 99.45 |
| DPP8       | 4.568  | 2.06  |
| DPP9       | 4.258  | 10.98 |
| DPPA2      | 1.379  | 0     |
| DPPA3      | 1.04   | 0     |
| DPPA4      | 2.579  | 0.03  |
| DPPA5      | 0.612  | 0.14  |
| DPRX       | 0.648  | 0     |
| DPRXP1     | 0.614  | 0     |
| DPRXP2     | 1.003  | 0.08  |
| DPRXP3     | 0.639  | 0     |
| DPRXP4     | 0.67   | 0.13  |
| DPRXP5     | 0.895  | 0     |
| DPRXP6     | 0.659  | 0     |
| DPRXP7     | 0.654  | 0     |
| DPT        | 1.703  | 0.05  |
| DPY19L1    | 9.73   | 1.45  |
| DPY19L2    | 4.057  | 0     |
| DPY19L2P1  | 43.61  | 0.01  |
| DPY19L2P3  | 10.642 | 0     |
| DPY19L3    | 4.456  | 1.02  |
| DPY19L4    | 4.179  | 1.66  |
| DPYD       | 4.409  | 2.35  |
| DPYS       | 2.122  | 0     |
| DPYSL2     | 4.54   | 50.75 |
| DPYSL3     | 5.05   | 0.05  |
| DPYSL4     | 2.715  | 0.03  |
| DPYSL5     | 3.061  | 0     |
| DQX1       | 2.54   | 0.03  |
| DR1        | 3.209  | 13.1  |
| DRAM       | 2.837  | 2.94  |
| DRAP1      | 0.988  | 63.69 |
| DRB1       | 1.785  | 4.2   |
| DRD1       | 3.373  | 0.15  |
| DRD1IP     | 0.914  | 0     |
| DRD2       | 2.579  | 0     |
| DRD3       | 1.824  | 0     |
| DRD4       | 1.36   | 0.19  |



|         |        |       |
|---------|--------|-------|
| DRD5    | 2.031  | 0.04  |
| DRD5P1  | 2.05   | 0     |
| DRD5P2  | 2.049  | 0     |
| DRG1    | 1.45   | 27.02 |
| DRG2    | 1.888  | 20.97 |
| DRP2    | 3.498  | 0.05  |
| DSC1    | 5.747  | 0     |
| DSC2    | 7.343  | 0     |
| DSC3    | 9.215  | 0.01  |
| DSCAM   | 8.388  | 0     |
| DSCAML1 | 6.899  | 0     |
| DSCR1   | 3.075  | 16.79 |
| DSCR10  | 0.86   | 0     |
| DSCR1L1 | 3.186  | 0     |
| DSCR1L2 | 1.7    | 0.54  |
| DSCR2   | 1.128  | 12.02 |
| DSCR3   | 3.251  | 8.04  |
| DSCR4   | 1.098  | 0     |
| DSCR6   | 2.235  | 0.37  |
| DSCR8   | 1.287  | 0.07  |
| DSCR9   | 1.644  | 0     |
| DSE     | 3.96   | 4.21  |
| DSEL    | 9.281  | 0.03  |
| DSG1    | 4.512  | 0     |
| DSG2    | 3.518  | 0     |
| DSG3    | 3.336  | 0     |
| DSG4    | 3.579  | 0     |
| DSN1    | 2.095  | 4.38  |
| DSP     | 10.228 | 0.02  |
| DSPP    | 4.331  | 0     |
| DSS1P1  | 0.477  | 11.83 |
| DST     | 30.184 | 0.02  |
| DSTN    | 2.536  | 10.96 |
| DTD1    | 1.344  | 0.19  |
| DTL     | 4.199  | 2.85  |
| DTNA    | 8.632  | 0     |
| DTNB    | 2.474  | 2.59  |
| DTNBP1  | 3.506  | 14.32 |
| DTWD1   | 1.222  | 4.62  |
| DTWD2   | 2.307  | 0.15  |
| DTX1    | 3.288  | 8.79  |
| DTX2    | 5.538  | 2.56  |
| DTX3    | 2.029  | 4.69  |
| DTX3L   | 5.15   | 11.89 |
| DTX4    | 8.446  | 0.34  |
| DTYMK   | 1.053  | 22.16 |
| DUB3    | 1.593  | 0     |
| DUB4    | 1.197  | 0     |
| DULLARD | 1.528  | 93.77 |
| DUOX1   | 5.677  | 0.08  |

|         |       |        |
|---------|-------|--------|
| DUOX2   | 6.346 | 0      |
| DUOXA1  | 1.88  | 0      |
| DUOXA2  | 1.725 | 0      |
| DUPD1   | 0.663 | 0      |
| DUS1L   | 2.197 | 39.65  |
| DUS2L   | 1.926 | 3.41   |
| DUS3L   | 2.056 | 8.68   |
| DUS4L   | 4.5   | 0.47   |
| DUSP1   | 2.016 | 78.1   |
| DUSP10  | 3.609 | 0.87   |
| DUSP11  | 1.575 | 10     |
| DUSP12  | 1.249 | 6.74   |
| DUSP13  | 3.403 | 0      |
| DUSP14  | 1.455 | 12.1   |
| DUSP15  | 1.905 | 3.05   |
| DUSP16  | 3.566 | 3.64   |
| DUSP18  | 2.453 | 1.03   |
| DUSP19  | 5.179 | 0.54   |
| DUSP2   | 1.682 | 7.51   |
| DUSP21  | 0.885 | 0.09   |
| DUSP22  | 1.851 | 7.23   |
| DUSP23  | 0.685 | 27.3   |
| DUSP26  | 1.649 | 8.33   |
| DUSP27  | 4.034 | 1.63   |
| DUSP28  | 1.555 | 3.2    |
| DUSP3   | 4.1   | 11.42  |
| DUSP4   | 5.15  | 0.28   |
| DUSP5   | 2.528 | 0.2    |
| DUSP5P  | 9.975 | 0.2    |
| DUSP6   | 2.82  | 126.18 |
| DUSP7   | 2.468 | 35.12  |
| DUSP8   | 2.371 | 0.1    |
| DUSP9   | 2.285 | 0.03   |
| DUT     | 2.802 | 19     |
| DUX1    | 1.229 | 0      |
| DUX4    | 2.571 | 0      |
| DUX4C   | 1.125 | 0      |
| DUXA    | 3.346 | 0      |
| DUXAP1  | 0.535 | 0      |
| DUXAP10 | 3.087 | 0.14   |
| DUXAP2  | 1.009 | 0      |
| DUXAP3  | 3.458 | 0      |
| DUXAP4  | 1.613 | 0.31   |
| DUXAP5  | 1.318 | 0      |
| DUXAP6  | 1.06  | 0      |
| DUXAP7  | 1.33  | 0      |
| DUXAP8  | 3.087 | 0.13   |
| DUXAP9  | 3.086 | 0.24   |
| DVL1    | 3.462 | 10.15  |
| DVL2    | 3.016 | 20.05  |

|          |        |        |
|----------|--------|--------|
| DVL3     | 5.062  | 18.97  |
| DYDC1    | 0.75   | 0.22   |
| DYDC2    | 1.842  | 0.14   |
| DYM      | 2.628  | 11.86  |
| DYNC1H1  | 14.224 | 11.8   |
| DYNC1I1  | 5.9    | 0.03   |
| DYNC1I2  | 2.602  | 17.22  |
| DYNC1LI1 | 2.477  | 11.57  |
| DYNC1LI2 | 4.336  | 4.45   |
| DYNC2H1  | 14.067 | 0.59   |
| DYNC2LI1 | 2.52   | 1.04   |
| DYNLL1   | 0.99   | 114.53 |
| DYNLL2   | 2.462  | 58.71  |
| DYNLRB1  | 0.685  | 123.59 |
| DYNLRB2  | 0.497  | 0      |
| DYNLT1   | 0.692  | 20.33  |
| DYNLT3   | 2.158  | 4.45   |
| DYRK1A   | 13.69  | 4.24   |
| DYRK1B   | 2.767  | 9.31   |
| DYRK2    | 6.216  | 8.68   |
| DYRK3    | 2.506  | 6.59   |
| DYRK4    | 1.845  | 7.12   |
| DYSF     | 6.883  | 0.93   |
| DYSFIP1  | 0.586  | 0      |
| DYTN     | 31.844 | 0      |
| DYX1C1   | 2.844  | 0.06   |
| DZIP1    | 7.47   | 0.01   |
| DZIP1L   | 3.493  | 0.12   |
| DZIP3    | 5.295  | 1.5    |
| E2F1     | 2.486  | 14.37  |
| E2F2     | 5.192  | 10.71  |
| E2F3     | 4.745  | 4.72   |
| E2F4     | 2.1    | 39.15  |
| E2F5     | 1.728  | 0.05   |
| E2F6     | 2.396  | 0.99   |
| E2F7     | 5.726  | 0.6    |
| E2F8     | 3.721  | 1.7    |
| E4F1     | 2.573  | 14.11  |
| EAF1     | 4.69   | 10.53  |
| EAF2     | 1.02   | 5.78   |
| EARS2    | 3.841  | 4.47   |
| EBAG9    | 1.862  | 7.87   |
| EBF1     | 4.088  | 31.76  |
| EBF2     | 2.28   | 0      |
| EBF3     | 4.361  | 0.21   |
| EBI2     | 1.73   | 0.78   |
| EBI3     | 1.138  | 0      |
| EBNA1BP2 | 1.322  | 25.94  |
| EBP      | 1.064  | 32.38  |
| EBPL     | 0.914  | 21.84  |

|          |       |        |
|----------|-------|--------|
| ECAT1    | 1.018 | 0      |
| ECAT8    | 3.931 | 0      |
| ECD      | 2.2   | 9.69   |
| ECE1     | 2.409 | 0.84   |
| ECE2     | 3.497 | 0.08   |
| ECEL1    | 2.858 | 39.85  |
| ECEL1P2  | 1.295 | 0      |
| ECEL1P3  | 0.238 | 0      |
| ECGF1    | 1.6   | 1.37   |
| ECH1     | 1.263 | 103.51 |
| ECHDC1   | 2.257 | 9.55   |
| ECHDC2   | 1.126 | 8.46   |
| ECHDC3   | 1.627 | 2.9    |
| ECHS1    | 1.326 | 48.91  |
| ECM1     | 2.047 | 717.13 |
| ECM2     | 3.163 | 2.23   |
| ECOP     | 5.78  | 4.4    |
| ECSIT    | 1.628 | 19.2   |
| ECSM2    | 0.246 | 0      |
| ECT2     | 3.916 | 1.08   |
| EDA      | 8.202 | 0.09   |
| EDA2R    | 3.372 | 2.69   |
| EDAR     | 4.212 | 0      |
| EDARADD  | 3.017 | 19.37  |
| EDC3     | 3.739 | 14.37  |
| EDC4     | 4.727 | 19.05  |
| EDD1     | 9.394 | 7.17   |
| EDEM1    | 6.071 | 72.27  |
| EDEM2    | 1.885 | 20.83  |
| EDEM3    | 6.283 | 1.9    |
| EDF1     | 0.859 | 277.51 |
| EDG1     | 2.898 | 0.35   |
| EDG2     | 3.168 | 0      |
| EDG3     | 4.206 | 0.08   |
| EDG4     | 1.823 | 5.22   |
| EDG5     | 1.154 | 0.73   |
| EDG6     | 1.565 | 128.21 |
| EDG7     | 1.137 | 0      |
| EDG8     | 2.122 | 0.24   |
| EDIL3    | 2.974 | 0      |
| EDN1     | 1.328 | 0      |
| EDN2     | 1.196 | 0      |
| EDN3     | 5.807 | 0      |
| EDNRA    | 4.093 | 0.04   |
| EDNRB    | 4.658 | 0      |
| EEA1     | 4.866 | 0.99   |
| EED      | 2.819 | 4.57   |
| EEF1A1   | 3.512 | 687.08 |
| EEF1A2   | 1.843 | 0.04   |
| EEF1AL11 | 1.748 | 6.27   |

|         |       |         |
|---------|-------|---------|
| EEF1B1  | 0.795 | 4.34    |
| EEF1B2  | 1.289 | 385.57  |
| EEF1B3  | 0.861 | 5.87    |
| EEF1D   | 2.329 | 244.46  |
| EEF1E1  | 1.036 | 6.75    |
| EEF1G   | 3.096 | 49.44   |
| EEF2    | 3.158 | 1668.18 |
| EEF2K   | 7.412 | 5.69    |
| EEFSEC  | 2.216 | 9.2     |
| EFCAB1  | 2.051 | 0       |
| EFCAB2  | 0.994 | 0.51    |
| EFCAB3  | 1.542 | 0.05    |
| EFCAB4A | 1.752 | 1.49    |
| EFCAB4B | 2.186 | 2.28    |
| EFCAB5  | 6.163 | 0.05    |
| EFCBP1  | 5.224 | 0.03    |
| EFCBP2  | 1.606 | 0.05    |
| EFEMP1  | 3.046 | 0.25    |
| EFEMP2  | 1.939 | 8.68    |
| EFHA1   | 1.876 | 7.59    |
| EFHA2   | 3.985 | 0       |
| EFHB    | 2.823 | 0       |
| EFHC1   | 2.099 | 4.05    |
| EFHC2   | 2.464 | 0       |
| EFHD1   | 1.868 | 0.49    |
| EFHD2   | 2.365 | 75.12   |
| EFNA1   | 1.566 | 29.64   |
| EFNA2   | 0.642 | 0       |
| EFNA3   | 1.782 | 3.83    |
| EFNA4   | 1.967 | 3.59    |
| EFNA5   | 1.574 | 0.05    |
| EFNB1   | 3.336 | 19.34   |
| EFNB2   | 4.322 | 7.64    |
| EFNB3   | 3.219 | 0.81    |
| EFS     | 3.118 | 0       |
| EFTUD1  | 3.562 | 4.21    |
| EFTUD2  | 3.313 | 29.14   |
| EGF     | 4.874 | 0       |
| EGFL11  | 2.23  | 0       |
| EGFL6   | 2.382 | 0       |
| EGFL7   | 2.089 | 75      |
| EGFL8   | 3.807 | 0.22    |
| EGFL9   | 1.61  | 0.15    |
| EGFLAM  | 8.135 | 0.01    |
| EGFR    | 13.29 | 0       |
| EGLN1   | 5.929 | 8.55    |
| EGLN2   | 7.135 | 8.8     |
| EGLN3   | 2.724 | 0.06    |
| EGR1    | 3.136 | 10.61   |
| EGR2    | 2.979 | 0.06    |

|          |        |        |
|----------|--------|--------|
| EGR3     | 4.334  | 0.23   |
| EGR4     | 2.149  | 0      |
| EHBP1    | 5.032  | 2.83   |
| EHBP1L1  | 5.185  | 20.47  |
| EHD1     | 3.457  | 12.01  |
| EHD2     | 3.495  | 0.43   |
| EHD3     | 3.769  | 16.9   |
| EHD4     | 3.192  | 20.22  |
| EHF      | 3.617  | 0      |
| EHHADH   | 3.801  | 1.31   |
| EHMT1    | 5.052  | 18.44  |
| EHMT2    | 11.904 | 0      |
| EI24     | 3.421  | 15.71  |
| EID1     | 2.091  | 54.5   |
| EID2     | 1.393  | 5.98   |
| EID2B    | 1.865  | 1.85   |
| EID3     | 1.435  | 1.76   |
| EIF1     | 1.468  | 319.15 |
| EIF1AP1  | 1.673  | 15.81  |
| EIF1AX   | 4.431  | 6.52   |
| EIF1AY   | 1.39   | 24.18  |
| EIF1B    | 1.012  | 27.97  |
| EIF2A    | 3.879  | 23.06  |
| EIF2AK1  | 5.594  | 29.03  |
| EIF2AK2  | 2.808  | 3.96   |
| EIF2AK3  | 4.511  | 3.08   |
| EIF2AK4  | 5.512  | 10.79  |
| EIF2B1   | 1.794  | 32.5   |
| EIF2B2   | 1.539  | 13.41  |
| EIF2B3   | 1.659  | 14.37  |
| EIF2B4   | 2.144  | 11.32  |
| EIF2B5   | 2.898  | 15.06  |
| EIF2C1   | 7.478  | 5.08   |
| EIF2C2   | 3.499  | 2.48   |
| EIF2C3   | 3.966  | 1.36   |
| EIF2C4   | 5.239  | 4.72   |
| EIF2S1   | 4.165  | 10.44  |
| EIF2S2   | 2.592  | 17.32  |
| EIF2S2P  | 1.545  | 1.91   |
| EIF2S2P2 | 1.375  | 0.18   |
| EIF2S3   | 3.465  | 62.82  |
| EIF3S1   | 2.558  | 16.5   |
| EIF3S10  | 5.305  | 48.19  |
| EIF3S12  | 0.879  | 288.54 |
| EIF3S2   | 1.458  | 79.91  |
| EIF3S3   | 1.275  | 244.12 |
| EIF3S4   | 1.127  | 250.98 |
| EIF3S5   | 1.256  | 383.89 |
| EIF3S5P  | 1.04   | 5.1    |
| EIF3S6   | 1.508  | 209.42 |

|            |       |        |
|------------|-------|--------|
| EIF3S6IP   | 1.949 | 341.79 |
| EIF3S6IPP  | 1.834 | 19.33  |
| EIF3S6IPP2 | 0.984 | 59.92  |
| EIF3S6P1   | 1.468 | 48.09  |
| EIF3S7     | 1.949 | 199.64 |
| EIF3S8     | 3.154 | 99.14  |
| EIF3S9     | 7.102 | 26.5   |
| EIF4A1     | 1.843 | 140.27 |
| EIF4A1P    | 0.941 | 0      |
| EIF4A2     | 2.598 | 134.46 |
| EIF4A3     | 1.686 | 34.47  |
| EIF4B      | 3.867 | 66.11  |
| EIF4BP     | 0.344 | 0      |
| EIF4E      | 2.474 | 6.88   |
| EIF4E1B    | 0.654 | 0      |
| EIF4E2     | 1.976 | 22.55  |
| EIF4E2P1   | 0.591 | 0      |
| EIF4E3     | 2.764 | 0.15   |
| EIF4EBP1   | 0.844 | 45.41  |
| EIF4EBP1P  | 0.808 | 0.21   |
| EIF4EBP2   | 4.291 | 24.26  |
| EIF4EBP3   | 0.691 | 12.68  |
| EIF4ENIF1  | 3.521 | 9.07   |
| EIF4EP1    | 0.639 | 0.93   |
| EIF4G1     | 6.388 | 40.84  |
| EIF4G2     | 3.792 | 123.93 |
| EIF4G3     | 5.793 | 19.34  |
| EIF4H      | 5.092 | 67.05  |
| EIF5       | 6.078 | 16.04  |
| EIF5A      | 1.234 | 127.18 |
| EIF5A2     | 5.537 | 0.02   |
| EIF5AP1    | 0.543 | 3.26   |
| EIF5AP2    | 0.559 | 0.3    |
| EIF5AP3    | 0.558 | 0.45   |
| EIF5B      | 4.698 | 22.89  |
| ELA1       | 0.952 | 0      |
| ELA2       | 0.924 | 19.05  |
| ELA2A      | 0.916 | 0      |
| ELA2B      | 0.923 | 0      |
| ELA3A      | 1.469 | 5.39   |
| ELA3B      | 1.003 | 0      |
| ELAC1      | 2.233 | 3.62   |
| ELAC2      | 3.368 | 16.68  |
| ELAVL1     | 6.058 | 15.47  |
| ELAVL2     | 2.177 | 0      |
| ELAVL3     | 5.013 | 0      |
| ELAVL4     | 1.578 | 0      |
| ELF1       | 3.485 | 22.58  |
| ELF2       | 3.753 | 4.33   |
| ELF3       | 4.99  | 0.02   |

|         |       |       |
|---------|-------|-------|
| ELF4    | 4.166 | 11.4  |
| ELF5    | 2.683 | 0     |
| ELK1    | 2.828 | 11.47 |
| ELK2P1  | 3.717 | 0.05  |
| ELK2P2  | 6.869 | 0.06  |
| ELK3    | 3.972 | 56.49 |
| ELK4    | 4.86  | 2.86  |
| ELL     | 4.008 | 4.18  |
| ELL2    | 3.752 | 3.14  |
| ELL3    | 2.113 | 2.07  |
| ELMO1   | 8.379 | 4.06  |
| ELMO2   | 3.704 | 14.97 |
| ELMO3   | 2.512 | 1.38  |
| ELMOD1  | 2.734 | 0     |
| ELMOD2  | 1.495 | 2.7   |
| ELN     | 4.548 | 0.05  |
| ELOF1   | 1.019 | 35.55 |
| ELOVL1  | 1.483 | 62.77 |
| ELOVL2  | 4.027 | 11.06 |
| ELOVL3  | 1.313 | 0     |
| ELOVL4  | 2.967 | 0     |
| ELOVL5  | 2.965 | 13.89 |
| ELOVL6  | 3.029 | 0.28  |
| ELOVL7  | 3.815 | 0     |
| ELP3    | 3.074 | 8.61  |
| ELP4    | 1.567 | 5.06  |
| ELSPBP1 | 1.031 | 0     |
| ELTD1   | 2.55  | 0.07  |
| EMB     | 2.055 | 7.38  |
| EMCN    | 1.483 | 0     |
| EMD     | 1.343 | 32.93 |
| EME1    | 2.304 | 1.68  |
| EME2    | 1.335 | 1.33  |
| EMG1    | 0.996 | 31.37 |
| EMID1   | 2.06  | 17.95 |
| EMID2   | 3.454 | 2.91  |
| EMILIN1 | 3.431 | 18.27 |
| EMILIN2 | 4.009 | 5     |
| EMILIN3 | 3.827 | 0.08  |
| EML1    | 4.522 | 0.08  |
| EML2    | 2.248 | 11.58 |
| EML3    | 3.167 | 15.21 |
| EML4    | 5.523 | 3.78  |
| EML5    | 7.081 | 0.12  |
| EMP1    | 2.749 | 37.51 |
| EMP2    | 3.03  | 14.7  |
| EMP3    | 0.816 | 43.15 |
| EMR1    | 3.123 | 0.05  |
| EMR2    | 6.962 | 4.21  |
| EMR3    | 2.951 | 0.03  |



|          |        |        |
|----------|--------|--------|
| EMR4     | 2.052  | 0      |
| EMX1     | 3.12   | 0      |
| EMX2     | 2.892  | 0.03   |
| EMX2OS   | 7.28   | 0      |
| EN1      | 2.943  | 0      |
| EN2      | 9.562  | 0      |
| ENAH     | 13.172 | 3.25   |
| ENAM     | 5.674  | 0.31   |
| ENC1     | 4.785  | 0.81   |
| ENDOD1   | 4.693  | 10.48  |
| ENDOG    | 2.059  | 10.96  |
| ENDOGL1  | 1.459  | 1.56   |
| ENG      | 3.13   | 184.84 |
| ENO1     | 1.812  | 605.74 |
| ENO1P    | 1.825  | 53.45  |
| ENO2     | 2.423  | 3.54   |
| ENO3     | 1.558  | 4.22   |
| ENOPH1   | 1.973  | 14.13  |
| ENOSF1   | 1.778  | 8.63   |
| ENPEP    | 3.829  | 0      |
| ENPP1    | 3.493  | 0      |
| ENPP2    | 3.276  | 14.27  |
| ENPP3    | 2.787  | 0      |
| ENPP4    | 4.311  | 0.02   |
| ENPP5    | 2.943  | 0      |
| ENPP6    | 3.841  | 0      |
| ENPP7    | 1.842  | 0      |
| ENSA     | 4.438  | 29.57  |
| ENSAP    | 0.341  | 0      |
| ENSAP2   | 0.474  | 25.77  |
| ENTHD1   | 2.71   | 0      |
| ENTPD1   | 2.457  | 5.59   |
| ENTPD2   | 2.166  | 0.08   |
| ENTPD3   | 2.776  | 0      |
| ENTPD4   | 2.672  | 5.99   |
| ENTPD5   | 1.992  | 1.31   |
| ENTPD6   | 2.729  | 12.31  |
| ENTPD7   | 3.017  | 0.06   |
| ENTPD8   | 2.111  | 0      |
| ENY2     | 0.569  | 39.08  |
| EOMES    | 2.754  | 0.15   |
| EP300    | 8.765  | 12.53  |
| EP400    | 12.265 | 8.47   |
| EP400NL  | 2.741  | 0.8    |
| EPAS1    | 5.138  | 8.68   |
| EPB41    | 7.515  | 4.76   |
| EPB41L1  | 6.496  | 0.45   |
| EPB41L2  | 4.291  | 10.78  |
| EPB41L3  | 4.446  | 0.15   |
| EPB41L4A | 4.707  | 1.72   |

|          |       |       |
|----------|-------|-------|
| EPB41L4B | 7.651 | 0.05  |
| EPB41L5  | 6.54  | 0.13  |
| EPB42    | 2.696 | 2.72  |
| EPB49    | 2.725 | 2.87  |
| EPC1     | 3.259 | 12.41 |
| EPC2     | 3.633 | 5.06  |
| EPDR1    | 5.198 | 1.34  |
| EPF5     | 0.421 | 0     |
| EPGN     | 0.847 | 0     |
| EPHA1    | 6.726 | 0.03  |
| EPHA10   | 4.278 | 0     |
| EPHA2    | 3.946 | 5.93  |
| EPHA3    | 6.924 | 0.01  |
| EPHA4    | 6.348 | 6.13  |
| EPHA5    | 3.349 | 0     |
| EPHA6    | 3.949 | 0     |
| EPHA7    | 5.215 | 0     |
| EPHA8    | 5.747 | 0     |
| EPHB1    | 4.516 | 0     |
| EPHB2    | 6.573 | 0.02  |
| EPHB3    | 4.22  | 4.35  |
| EPHB4    | 8.702 | 5.96  |
| EPHB6    | 8.086 | 0.8   |
| EPHX1    | 2.426 | 15.13 |
| EPHX2    | 2.196 | 0     |
| EPM2A    | 4.092 | 1.44  |
| EPM2AIP1 | 5.567 | 4.03  |
| EPN1     | 2.461 | 52.06 |
| EPN2     | 4.814 | 0.02  |
| EPN3     | 2.93  | 0.03  |
| EPO      | 2.66  | 0     |
| EPOR     | 1.848 | 1.05  |
| EPPB9    | 0.915 | 0.55  |
| EPPK1    | 7.216 | 0     |
| EPR1     | 1.286 | 11.92 |
| EPRS     | 5.015 | 17.68 |
| EPS15    | 5.22  | 13.05 |
| EPS15L1  | 3.07  | 11.34 |
| EPS8     | 3.906 | 0.48  |
| EPS8L1   | 3.411 | 0.08  |
| EPS8L2   | 3.141 | 0.05  |
| EPS8L3   | 2.49  | 0     |
| EPST11   | 2.09  | 3.06  |
| EPX      | 2.267 | 0.67  |
| EPYC     | 1.535 | 0     |
| ERAF     | 0.506 | 21.14 |
| ERAL1    | 1.825 | 28.15 |
| ERAS     | 1.266 | 0     |
| ERBB2    | 5.279 | 18.45 |
| ERBB2IP  | 6.916 | 9.38  |

|        |        |        |
|--------|--------|--------|
| ERBB3  | 6.134  | 0.74   |
| ERBB4  | 5.485  | 0      |
| ERC1   | 10.659 | 1.29   |
| ERC2   | 6.138  | 0      |
| ERCC1  | 1.583  | 46.24  |
| ERCC2  | 2.355  | 14.52  |
| ERCC3  | 2.75   | 14.45  |
| ERCC4  | 2.751  | 1.16   |
| ERCC5  | 4.096  | 13.32  |
| ERCC6  | 4.713  | 1.1    |
| ERCC8  | 2.843  | 1.51   |
| EREG   | 4.628  | 0.02   |
| ERF    | 2.665  | 49.44  |
| ERG    | 3.929  | 35.91  |
| ERGIC1 | 6.673  | 40.52  |
| ERGIC2 | 1.777  | 3.13   |
| ERGIC3 | 1.366  | 172.97 |
| ERH    | 1.589  | 39.97  |
| ERICH1 | 1.8    | 14.37  |
| ERLIN1 | 3.104  | 7.19   |
| ERLIN2 | 6.073  | 5.56   |
| ERMAP  | 3.616  | 3.36   |
| ERN1   | 4.887  | 1.17   |
| ERN2   | 3.549  | 0      |
| ERO1L  | 3.31   | 2.72   |
| ERO1LB | 2.962  | 2.02   |
| ERP28P | 0.788  | 10.48  |
| ERP29  | 2.543  | 196.53 |
| ERRF11 | 3.077  | 0.3    |
| ERV3   | 3.39   | 2.56   |
| ERVWE1 | 6.088  | 0      |
| ESAM   | 1.811  | 2.65   |
| ESCO1  | 4.435  | 1.85   |
| ESCO2  | 3.359  | 0.8    |
| ESD    | 1.192  | 39.43  |
| ESF1   | 3.216  | 2.8    |
| ESM1   | 1.637  | 0.15   |
| ESPL1  | 6.532  | 3.11   |
| ESPN   | 3.516  | 0.12   |
| ESPNL  | 4.607  | 0.22   |
| ESR1   | 6.455  | 0      |
| ESR2   | 3.404  | 0.1    |
| ESRRA  | 2.221  | 4.7    |
| ESRRB  | 2.193  | 0      |
| ESRRG  | 5.99   | 0      |
| ESSPL  | 1.011  | 0      |
| ESTRRA | 2.876  | 0.14   |
| ESX1   | 1.469  | 0      |
| ETAA1  | 3.283  | 1.87   |
| ETF1   | 3.656  | 13.89  |

|         |        |        |
|---------|--------|--------|
| ETF1P1  | 6.495  | 0.08   |
| ETF1P2  | 5.068  | 0.22   |
| ETFA    | 1.402  | 33.29  |
| ETFB    | 1.609  | 35.5   |
| ETFDH   | 2.109  | 5.8    |
| ETHE1   | 0.963  | 33.15  |
| ETNK1   | 7.306  | 3.97   |
| ETNK2   | 2.43   | 0      |
| ETS1    | 5.194  | 6.76   |
| ETS2    | 3.672  | 53.57  |
| ETV1    | 12.313 | 0.06   |
| ETV2    | 1.559  | 0.54   |
| ETV3    | 1.411  | 1.13   |
| ETV4    | 2.402  | 1.72   |
| ETV5    | 4.074  | 15.74  |
| ETV6    | 5.989  | 11.27  |
| ETV7    | 1.626  | 1.09   |
| EVA1    | 2.955  | 0      |
| EVC     | 6.43   | 1.42   |
| EVC2    | 4.406  | 1.51   |
| EVI1    | 3.572  | 0      |
| EVI2A   | 2.434  | 19.9   |
| EVI2B   | 1.954  | 28.45  |
| EVI5    | 7.403  | 0.77   |
| EVI5L   | 3.731  | 5.53   |
| EVL     | 1.842  | 140.58 |
| EVPL    | 6.457  | 0.24   |
| EVX1    | 3.716  | 0      |
| EVX2    | 1.617  | 0      |
| EWSR1   | 2.714  | 94.05  |
| EXDL1   | 2.939  | 0      |
| EXDL2   | 2.831  | 5.53   |
| EXO1    | 3.507  | 1.92   |
| EXOC1   | 3.73   | 4.61   |
| EXOC2   | 4.442  | 4.88   |
| EXOC3   | 2.764  | 14.39  |
| EXOC3L  | 6.034  | 2.62   |
| EXOC3L2 | 1.719  | 0.83   |
| EXOC4   | 8.703  | 7.09   |
| EXOC5   | 8.511  | 2.99   |
| EXOC6   | 3.715  | 2.45   |
| EXOC6B  | 6.018  | 0.82   |
| EXOC7   | 5.755  | 27.75  |
| EXOC8   | 5.099  | 1.49   |
| EXOD1   | 1.479  | 0.91   |
| EXOSC1  | 1.15   | 16.26  |
| EXOSC10 | 2.808  | 18.09  |
| EXOSC2  | 1.979  | 10.38  |
| EXOSC3  | 1.816  | 2.65   |
| EXOSC4  | 0.895  | 21.84  |

|         |        |       |
|---------|--------|-------|
| EXOSC5  | 1.696  | 20.17 |
| EXOSC6  | 1.7    | 14.32 |
| EXOSC7  | 1.013  | 13.47 |
| EXOSC8  | 0.959  | 11.42 |
| EXOSC9  | 1.883  | 10.82 |
| EXPH5   | 6.655  | 0     |
| EXT1    | 3.363  | 0.48  |
| EXT2    | 3.787  | 12.35 |
| EXTL1   | 3.992  | 0     |
| EXTL2   | 2.958  | 2.14  |
| EXTL3   | 6.172  | 5     |
| EYA1    | 4.793  | 0     |
| EYA2    | 3.411  | 0     |
| EYA3    | 2.045  | 2.76  |
| EYA4    | 3.401  | 0.08  |
| EZH1    | 4.623  | 8.23  |
| EZH2    | 5.698  | 4.05  |
| F10     | 1.536  | 0     |
| F11     | 2.217  | 0     |
| F11R    | 4.788  | 12.03 |
| F12     | 2.049  | 0.08  |
| F13A1   | 3.834  | 3.93  |
| F13B    | 2.186  | 0     |
| F2      | 1.997  | 0     |
| F25965  | 0.9    | 7.21  |
| F2R     | 3.595  | 19.56 |
| F2RL1   | 2.862  | 0.03  |
| F2RL2   | 3.41   | 1.63  |
| F2RL3   | 2.731  | 3.36  |
| F3      | 2.154  | 0.15  |
| F5      | 6.914  | 0.01  |
| F7      | 2.736  | 0.77  |
| F8      | 11.005 | 0.16  |
| F8A1    | 1.702  | 3.07  |
| F8A2    | 1.116  | 0     |
| F8A3    | 1.116  | 0     |
| F9      | 2.802  | 0     |
| FA2H    | 2.419  | 0     |
| FAAH    | 2.043  | 1.73  |
| FAAH2   | 1.98   | 0.17  |
| FABP1   | 0.489  | 0     |
| FABP2   | 2.251  | 0     |
| FABP3   | 1.097  | 0.38  |
| FABP3P2 | 0.444  | 0.57  |
| FABP4   | 0.62   | 3.94  |
| FABP5   | 0.66   | 6.13  |
| FABP5L3 | 13.956 | 0.55  |
| FABP5P1 | 0.664  | 0     |
| FABP6   | 0.858  | 0     |
| FABP7   | 1      | 0     |

|           |       |        |
|-----------|-------|--------|
| FADD      | 1.841 | 9.42   |
| FADS1     | 4.195 | 2.21   |
| FADS2     | 3.149 | 17.5   |
| FADS3     | 1.779 | 8.62   |
| FADS6     | 2.052 | 0      |
| FAF1      | 2.608 | 16.66  |
| FAH       | 1.447 | 2.21   |
| FAHD1     | 3.35  | 3.09   |
| FAHD2A    | 1.298 | 11.94  |
| FAHD2B    | 1.265 | 3.6    |
| FAIM      | 1.794 | 4.09   |
| FAIM2     | 4.703 | 0      |
| FAIM3     | 1.95  | 39.57  |
| FAM100A   | 1.355 | 16.48  |
| FAM100B   | 1.423 | 157.99 |
| FAM101A   | 2.148 | 0      |
| FAM101B   | 2.952 | 31.31  |
| FAM102A   | 4.183 | 2.28   |
| FAM102B   | 5.212 | 1.97   |
| FAM103A1  | 1.146 | 4.78   |
| FAM103A2P | 1.4   | 8.18   |
| FAM104A   | 2.697 | 12.3   |
| FAM104B   | 1.048 | 3.05   |
| FAM105A   | 1.925 | 0.08   |
| FAM105B   | 2.58  | 4.51   |
| FAM106A   | 2.281 | 0.11   |
| FAM107A   | 3.464 | 0      |
| FAM107B   | 3.785 | 34.54  |
| FAM108A1  | 1.63  | 5.22   |
| FAM108A2  | 1.512 | 0.78   |
| FAM109A   | 3.041 | 5.52   |
| FAM109B   | 2.332 | 6.82   |
| FAM10A3   | 2.597 | 0.16   |
| FAM10A4   | 1.599 | 0.16   |
| FAM10A5   | 1.632 | 0.67   |
| FAM10A6   | 1.662 | 0.86   |
| FAM10A7   | 5.195 | 0.03   |
| FAM110C   | 1.521 | 0      |
| FAM111A   | 3.632 | 12.62  |
| FAM111B   | 3.488 | 2.34   |
| FAM112A   | 1.214 | 0.28   |
| FAM112B   | 0.769 | 34.07  |
| FAM113A   | 2.331 | 28.26  |
| FAM113B   | 2.075 | 0.48   |
| FAM114A1  | 2.118 | 0.56   |
| FAM116A   | 4.643 | 2.7    |
| FAM116B   | 1.763 | 7.21   |
| FAM117A   | 2.361 | 38.78  |
| FAM118A   | 1.69  | 5.48   |
| FAM118B   | 1.645 | 7.48   |

|           |       |        |
|-----------|-------|--------|
| FAM119A   | 1.773 | 3.42   |
| FAM119B   | 5.127 | 2.52   |
| FAM120A   | 4.957 | 24.15  |
| FAM120AOS | 2.764 | 15.94  |
| FAM120B   | 3.239 | 10.8   |
| FAM120C   | 4.232 | 1.01   |
| FAM122A   | 3.646 | 5.63   |
| FAM122B   | 3.747 | 7.62   |
| FAM122C   | 1.339 | 1.83   |
| FAM123A   | 4.857 | 0.02   |
| FAM123B   | 3.687 | 1      |
| FAM124A   | 2.104 | 0      |
| FAM124B   | 2.594 | 0.36   |
| FAM125A   | 1.193 | 20.34  |
| FAM125B   | 6.877 | 0.8    |
| FAM126A   | 7.498 | 0.76   |
| FAM126B   | 3.987 | 0.68   |
| FAM127A   | 1.18  | 18.56  |
| FAM127B   | 0.345 | 15.87  |
| FAM127C   | 2.017 | 0.34   |
| FAM128B   | 0.731 | 208.34 |
| FAM129A   | 6.926 | 4.3    |
| FAM129B   | 4.017 | 16.38  |
| FAM129C   | 2.314 | 30.14  |
| FAM12A    | 0.879 | 0      |
| FAM12B    | 0.896 | 0      |
| FAM130A1  | 4.469 | 2.97   |
| FAM130A2  | 2.938 | 0      |
| FAM13A1   | 6.134 | 1.11   |
| FAM13A1OS | 3.21  | 0.71   |
| FAM13C1   | 4.799 | 0      |
| FAM14A    | 0.467 | 16.77  |
| FAM14B    | 0.882 | 6.49   |
| FAM18B    | 1.779 | 1.66   |
| FAM18B2   | 1.513 | 0.34   |
| FAM19A1   | 1.915 | 2.59   |
| FAM19A2   | 4.056 | 0      |
| FAM19A3   | 1.866 | 0      |
| FAM19A4   | 2.481 | 0      |
| FAM19A5   | 1.849 | 0      |
| FAM20A    | 2.267 | 0.03   |
| FAM20B    | 5.942 | 6.16   |
| FAM20C    | 3.557 | 0.38   |
| FAM21B    | 4.326 | 2.22   |
| FAM21C    | 4.62  | 1.89   |
| FAM22A    | 4.871 | 0.05   |
| FAM22F    | 2.756 | 0.06   |
| FAM22G    | 3.614 | 0.14   |
| FAM24A    | 0.596 | 0      |
| FAM24B    | 0.693 | 0      |

|         |        |       |
|---------|--------|-------|
| FAM26A  | 1.636  | 0     |
| FAM26B  | 1.859  | 5.53  |
| FAM26C  | 3.053  | 0     |
| FAM27E1 | 1.341  | 0     |
| FAM27E2 | 1.338  | 0.06  |
| FAM27L  | 0.609  | 0     |
| FAM29A  | 6.321  | 1.6   |
| FAM32A  | 1.449  | 54.76 |
| FAM33A  | 2.693  | 10.42 |
| FAM35A  | 3.402  | 1.96  |
| FAM36A  | 2.855  | 9.91  |
| FAM38A  | 6.371  | 48.97 |
| FAM38B  | 2.325  | 0.03  |
| FAM39B  | 1.712  | 2.56  |
| FAM39CP | 5.493  | 0.06  |
| FAM39DP | 2.544  | 2.12  |
| FAM3A   | 1.606  | 19.36 |
| FAM3B   | 1.384  | 0     |
| FAM3C   | 5.5    | 1.94  |
| FAM3D   | 1.308  | 0     |
| FAM40A  | 3.262  | 12.24 |
| FAM40B  | 10.171 | 0.36  |
| FAM43A  | 3.145  | 36.99 |
| FAM43B  | 2.569  | 0     |
| FAM44A  | 10.542 | 3.42  |
| FAM44B  | 1.532  | 9.73  |
| FAM44C  | 3.359  | 0.25  |
| FAM45A  | 2.182  | 2.74  |
| FAM45B  | 1.818  | 1.86  |
| FAM46A  | 1.681  | 0.05  |
| FAM46B  | 2.368  | 0.21  |
| FAM46C  | 5.695  | 1.33  |
| FAM46D  | 3.011  | 0     |
| FAM47A  | 2.519  | 0     |
| FAM47B  | 2.104  | 0     |
| FAM47C  | 3.27   | 0     |
| FAM48A  | 3.526  | 8.63  |
| FAM48B1 | 2.661  | 0     |
| FAM49A  | 2.072  | 12.36 |
| FAM49B  | 2.196  | 21.1  |
| FAM50A  | 1.311  | 15.55 |
| FAM50B  | 1.618  | 7.39  |
| FAM53A  | 1.896  | 0.54  |
| FAM53B  | 5.74   | 46.21 |
| FAM53C  | 4.13   | 16.42 |
| FAM54A  | 1.505  | 0.95  |
| FAM54B  | 2.099  | 12.08 |
| FAM55A  | 1.888  | 0     |
| FAM55B  | 2.218  | 0     |
| FAM55C  | 3.934  | 3.42  |



|         |        |       |
|---------|--------|-------|
| FAM55D  | 1.687  | 0     |
| FAM57A  | 2.08   | 0.44  |
| FAM57B  | 1.637  | 0.31  |
| FAM58A  | 1.237  | 13.35 |
| FAM58B  | 0.645  | 0.26  |
| FAM59A  | 3.055  | 0     |
| FAM59B  | 4.503  | 0.71  |
| FAM5B   | 3.558  | 0.03  |
| FAM5C   | 2.884  | 0     |
| FAM60A  | 3.068  | 8.92  |
| FAM62A  | 4.174  | 36.75 |
| FAM62B  | 11.912 | 10.84 |
| FAM62C  | 4.051  | 0     |
| FAM63A  | 5.486  | 1.54  |
| FAM63B  | 5.139  | 0.65  |
| FAM64A  | 1.483  | 4.6   |
| FAM65A  | 4.07   | 24.18 |
| FAM66C  | 0.914  | 0     |
| FAM69A  | 0.64   | 0.79  |
| FAM69B  | 1.859  | 7.11  |
| FAM70A  | 3.394  | 0.05  |
| FAM70B  | 1.031  | 0.25  |
| FAM71A  | 2.302  | 0     |
| FAM71B  | 2.032  | 0     |
| FAM71C  | 1.799  | 0     |
| FAM72A  | 2.393  | 0     |
| FAM73A  | 5.274  | 0.38  |
| FAM73B  | 3.587  | 6.55  |
| FAM74A1 | 1.652  | 0     |
| FAM74A4 | 1.722  | 0     |
| FAM76A  | 2.049  | 2.55  |
| FAM76B  | 3.825  | 2.21  |
| FAM77C  | 2.493  | 0     |
| FAM77D  | 1.988  | 0     |
| FAM78A  | 3.936  | 1.16  |
| FAM78B  | 1.598  | 0     |
| FAM79A  | 2.428  | 11.17 |
| FAM79B  | 3.656  | 0     |
| FAM7A2  | 1.017  | 1.9   |
| FAM7A3  | 0.587  | 0.14  |
| FAM80A  | 1.51   | 0     |
| FAM80B  | 1.777  | 17.02 |
| FAM81A  | 2.906  | 0     |
| FAM81B  | 1.56   | 0     |
| FAM82A  | 1.985  | 0.25  |
| FAM82B  | 1.404  | 8.28  |
| FAM82C  | 2.251  | 14.37 |
| FAM83A  | 3.856  | 0.07  |
| FAM83B  | 3.167  | 0     |
| FAM83C  | 3.166  | 0     |

|           |       |       |
|-----------|-------|-------|
| FAM83D    | 2.425 | 2.15  |
| FAM83E    | 1.926 | 0     |
| FAM83F    | 1.925 | 0     |
| FAM83G    | 4.582 | 0.02  |
| FAM83H    | 5.597 | 0.03  |
| FAM84A    | 2.586 | 0     |
| FAM84B    | 5.232 | 0.05  |
| FAM86A    | 1.432 | 1.18  |
| FAM86B1   | 2.041 | 0.17  |
| FAM86C    | 3.688 | 0.43  |
| FAM86D    | 2.854 | 1.09  |
| FAM89A    | 1.27  | 0.2   |
| FAM89B    | 1.412 | 29.89 |
| FAM8A1    | 4.677 | 1.6   |
| FAM8A6P   | 4.613 | 0.05  |
| FAM8A7P   | 1.342 | 0     |
| FAM8A8P   | 1.677 | 0     |
| FAM8A9P   | 1.949 | 0     |
| FAM90A1   | 2.342 | 0.03  |
| FAM90A10  | 1.954 | 0     |
| FAM90A11P | 1.952 | 0     |
| FAM90A12  | 1.954 | 0     |
| FAM90A2P  | 1.954 | 0     |
| FAM90A3   | 1.954 | 0     |
| FAM90A5   | 1.954 | 0     |
| FAM90A6P  | 5.518 | 0     |
| FAM90A7   | 1.954 | 0     |
| FAM90A8   | 1.954 | 0     |
| FAM90A9   | 1.954 | 0     |
| FAM91A1   | 5.326 | 1.68  |
| FAM91A2   | 0.779 | 0     |
| FAM92A1   | 1.646 | 0.15  |
| FAM92A3   | 1.228 | 0     |
| FAM92B    | 1.897 | 0     |
| FAM96A    | 1.605 | 8.55  |
| FAM96B    | 0.668 | 61.03 |
| FAM98A    | 2.745 | 6.42  |
| FAM98B    | 3.47  | 5.43  |
| FAM98C    | 1.204 | 8.53  |
| FAM99A    | 1.989 | 0     |
| FAM9A     | 1.519 | 0     |
| FAM9B     | 1.34  | 0     |
| FAM9C     | 3.239 | 0     |
| FANCA     | 6.181 | 3.38  |
| FANCB     | 3.008 | 0.31  |
| FANCC     | 4.592 | 0.95  |
| FANCD2    | 6.043 | 3     |
| FANCE     | 2.555 | 3.46  |
| FANCF     | 3.309 | 2.8   |
| FANCG     | 2.631 | 4.67  |

|         |        |        |
|---------|--------|--------|
| FANCL   | 1.716  | 4.03   |
| FANCM   | 7.125  | 0.58   |
| FANK1   | 1.296  | 0.07   |
| FAP     | 2.78   | 0.03   |
| FAR1    | 0.795  | 25.43  |
| FAR10   | 0.176  | 56.95  |
| FAR11   | 0.215  | 10.97  |
| FAR12   | 0.25   | 14.83  |
| FAR13   | 0.436  | 19.51  |
| FAR14   | 0.362  | 9.31   |
| FAR15   | 0.725  | 10.57  |
| FAR16   | 0.105  | 535.1  |
| FAR17   | 0.922  | 40.29  |
| FAR18   | 0.842  | 52.32  |
| FAR19   | 1.029  | 18.01  |
| FAR2    | 3.536  | 42.02  |
| FAR20   | 0.123  | 72.6   |
| FAR21   | 0.16   | 14.22  |
| FAR22   | 0.272  | 111.49 |
| FAR23   | 0.234  | 14.4   |
| FAR3    | 0.372  | 13.81  |
| FAR4    | 0.296  | 9.68   |
| FAR5    | 6.057  | 89.3   |
| FAR6    | 0.381  | 10.17  |
| FAR7    | 0.629  | 23.57  |
| FAR8    | 1.773  | 23.28  |
| FAR9    | 0.195  | 13.39  |
| FARP1   | 5.74   | 10.42  |
| FARP2   | 3.997  | 1.73   |
| FARS2   | 2.104  | 11.17  |
| FARSA   | 1.808  | 37.55  |
| FARSB   | 3.118  | 11.05  |
| FAS     | 6.169  | 0.23   |
| FASLG   | 1.86   | 0.14   |
| FASN    | 8.458  | 11.41  |
| FASTK   | 3.704  | 6.64   |
| FASTKD1 | 2.898  | 5.15   |
| FASTKD2 | 2.894  | 4.13   |
| FASTKD3 | 2.402  | 1.12   |
| FASTKD5 | 2.863  | 6.38   |
| FAT     | 14.764 | 0.01   |
| FAT1P1  | 0.506  | 0      |
| FAT2    | 14.535 | 0      |
| FAT3    | 19.163 | 0      |
| FAT4    | 9.669  | 0.02   |
| FATE1   | 1.071  | 0      |
| FAU     | 0.56   | 751.35 |
| FAUP1   | 0.414  | 778.27 |
| FBF1    | 5.149  | 1.41   |
| FBL     | 1.079  | 263.32 |

|        |        |       |
|--------|--------|-------|
| FBLIM1 | 4.139  | 0.06  |
| FBLN1  | 4.857  | 0.2   |
| FBLN2  | 4.325  | 0.06  |
| FBLN5  | 2.622  | 0.09  |
| FBN1   | 11.626 | 0.43  |
| FBN2   | 10.724 | 0     |
| FBN3   | 8.967  | 0     |
| FBP1   | 1.476  | 0.23  |
| FBP2   | 1.305  | 0     |
| FBS1   | 2.799  | 40.33 |
| FBXL10 | 6.912  | 13.55 |
| FBXL11 | 6.471  | 19.67 |
| FBXL12 | 1.852  | 8.87  |
| FBXL13 | 6.339  | 1.75  |
| FBXL14 | 2.111  | 4.31  |
| FBXL15 | 2.344  | 6.72  |
| FBXL16 | 3.416  | 0.17  |
| FBXL17 | 3.673  | 1.88  |
| FBXL18 | 5.05   | 0.52  |
| FBXL19 | 4.185  | 31.99 |
| FBXL2  | 2.368  | 0.03  |
| FBXL20 | 2.624  | 3.79  |
| FBXL21 | 1.333  | 0     |
| FBXL22 | 1.482  | 0.06  |
| FBXL3  | 3.468  | 5.44  |
| FBXL4  | 2.777  | 4.37  |
| FBXL5  | 3.758  | 11.73 |
| FBXL6  | 1.791  | 7.81  |
| FBXL7  | 4.562  | 0     |
| FBXL8  | 1.599  | 3.69  |
| FBXO10 | 4.564  | 0.9   |
| FBXO11 | 4.745  | 7.99  |
| FBXO15 | 1.682  | 0     |
| FBXO16 | 1.292  | 0     |
| FBXO17 | 2.696  | 0     |
| FBXO18 | 3.798  | 21.56 |
| FBXO2  | 1.536  | 0.27  |
| FBXO21 | 4.424  | 4.67  |
| FBXO22 | 3.907  | 2.52  |
| FBXO24 | 5.056  | 1.25  |
| FBXO25 | 2.687  | 2.51  |
| FBXO27 | 2.324  | 0     |
| FBXO28 | 2.924  | 3.08  |
| FBXO3  | 2.986  | 1.56  |
| FBXO30 | 4.408  | 1.05  |
| FBXO31 | 3.585  | 7.55  |
| FBXO32 | 1.855  | 0.95  |
| FBXO33 | 3.683  | 2.26  |
| FBXO34 | 3.408  | 6.94  |
| FBXO36 | 0.909  | 0.47  |

|          |        |        |
|----------|--------|--------|
| FBXO38   | 4.886  | 4.19   |
| FBXO39   | 1.647  | 0.05   |
| FBXO4    | 2.462  | 2.19   |
| FBXO40   | 3.411  | 0      |
| FBXO41   | 7.121  | 4.52   |
| FBXO42   | 2.976  | 6.68   |
| FBXO43   | 2.892  | 0.88   |
| FBXO44   | 5.823  | 4.98   |
| FBXO45   | 0.561  | 4.21   |
| FBXO46   | 3.003  | 8.05   |
| FBXO47   | 2.269  | 0      |
| FBXO5    | 2.064  | 6      |
| FBXO6    | 1.52   | 4.49   |
| FBXO7    | 2.458  | 41.57  |
| FBXO8    | 2.564  | 2.17   |
| FBXO9    | 5.762  | 5.43   |
| FBXW10   | 3.456  | 0.05   |
| FBXW11   | 4.638  | 9.21   |
| FBXW11P1 | 1.134  | 1.93   |
| FBXW12   | 1.647  | 0      |
| FBXW2    | 2.502  | 11.82  |
| FBXW4    | 2.212  | 24.9   |
| FBXW5    | 2.345  | 39.08  |
| FBXW7    | 4.577  | 25.84  |
| FBXW8    | 4.975  | 6.57   |
| FBXW9    | 1.713  | 5.01   |
| FCAMR    | 2.133  | 0      |
| FCAR     | 4.396  | 0.38   |
| FCER1A   | 1.165  | 0      |
| FCER1G   | 0.591  | 6.84   |
| FCER2    | 1.561  | 1.89   |
| FCF1     | 2.409  | 10.6   |
| FCGBP    | 16.382 | 0.11   |
| FCGR1A   | 2.138  | 0.2    |
| FCGR2A   | 2.411  | 26.35  |
| FCGR2B   | 1.888  | 27.08  |
| FCGR2C   | 1.56   | 16.2   |
| FCGR3A   | 2.31   | 2.34   |
| FCGR3B   | 1.971  | 0.43   |
| FCGRT    | 1.478  | 242.22 |
| FCHO1    | 3.154  | 2.59   |
| FCHO2    | 4.89   | 1.02   |
| FCHSD1   | 4.32   | 0.95   |
| FCHSD2   | 4.339  | 11.26  |
| FCMD     | 7.35   | 0.8    |
| FCN1     | 1.285  | 10.29  |
| FCN2     | 1.057  | 0.08   |
| FCN3     | 1.032  | 0      |
| FCRL1    | 2.592  | 0.07   |
| FCRL2    | 3.268  | 0      |

|        |        |        |
|--------|--------|--------|
| FCRL3  | 3.422  | 0.05   |
| FCRL4  | 3.459  | 0      |
| FCRL5  | 5.39   | 0.03   |
| FCRL6  | 1.306  | 0.25   |
| FCRLA  | 2.345  | 0.11   |
| FCRLB  | 1.768  | 0      |
| FDFT1  | 2.106  | 65     |
| FDPS   | 1.324  | 40.4   |
| FDPSL1 | 1.155  | 1.53   |
| FDPSP  | 0.561  | 0      |
| FDX1   | 3.219  | 2.99   |
| FDXP1  | 0.676  | 1.74   |
| FDXP2  | 0.975  | 0.08   |
| FDXR   | 2.259  | 10.07  |
| FECH   | 3.962  | 4.61   |
| FECHP  | 2.414  | 0.03   |
| FEM1A  | 3.799  | 10.73  |
| FEM1B  | 2.873  | 7.95   |
| FEM1C  | 5.813  | 1.1    |
| FEN1   | 2.249  | 18.54  |
| FER    | 3.279  | 2.54   |
| FER1L3 | 6.808  | 1.38   |
| FER1L4 | 45.093 | 0.04   |
| FERD3L | 1.28   | 0      |
| FERP   | 0.793  | 4.99   |
| FES    | 2.762  | 19     |
| FETUB  | 1.627  | 0      |
| FEV    | 1.879  | 0      |
| FEZ1   | 3.252  | 0      |
| FEZ2   | 1.917  | 9.84   |
| FEZF1  | 3.048  | 0      |
| FEZF2  | 1.905  | 0      |
| FFAR1  | 0.903  | 0.19   |
| FFAR2  | 0.993  | 0.08   |
| FFAR3  | 1.66   | 0      |
| FGA    | 5.297  | 0      |
| FGB    | 1.937  | 0      |
| FGD1   | 4.275  | 3.51   |
| FGD2   | 3.044  | 7.39   |
| FGD3   | 0.1    | 618.29 |
| FGD4   | 2.931  | 0.25   |
| FGD5   | 5.383  | 0.08   |
| FGD6   | 4.996  | 0.55   |
| FGF1   | 4.281  | 0      |
| FGF10  | 0.627  | 0      |
| FGF11  | 2.715  | 0.43   |
| FGF12  | 3.054  | 0      |
| FGF13  | 2.788  | 1.03   |
| FGF14  | 1.194  | 0      |
| FGF16  | 0.35   | 0      |

|          |        |       |
|----------|--------|-------|
| FGF17    | 1.223  | 0     |
| FGF18    | 1.528  | 0     |
| FGF19    | 2.137  | 0     |
| FGF2     | 6.774  | 0.08  |
| FGF20    | 1.016  | 0     |
| FGF21    | 0.885  | 0     |
| FGF22    | 0.513  | 0     |
| FGF23    | 3.018  | 1.5   |
| FGF3     | 1.548  | 0     |
| FGF4     | 1.22   | 0     |
| FGF5     | 10.082 | 0     |
| FGF6     | 4.217  | 16.2  |
| FGF7     | 3.852  | 0.03  |
| FGF8     | 1.252  | 0.07  |
| FGF9     | 1.417  | 0     |
| FGFBP1   | 1.182  | 0     |
| FGFBP2   | 1.137  | 1.78  |
| FGFBP3   | 2.545  | 1.45  |
| FGFR1    | 6.867  | 50.02 |
| FGFR1OP  | 1.885  | 3.26  |
| FGFR1OP2 | 2.3    | 8.86  |
| FGFR2    | 6.089  | 0     |
| FGFR3    | 4.069  | 0.14  |
| FGFR4    | 3.404  | 0.03  |
| FGFRL1   | 3.253  | 4.22  |
| FGG      | 2.152  | 0     |
| FGL1     | 1.556  | 0     |
| FGL2     | 2.938  | 0.23  |
| FGR      | 2.352  | 2.04  |
| FH       | 1.79   | 17.65 |
| FHAD1    | 5.217  | 0.23  |
| FHIT     | 1.227  | 15.03 |
| FHL1     | 2.377  | 66.62 |
| FHL2     | 2.52   | 0.26  |
| FHL3     | 1.704  | 27.39 |
| FHL5     | 2.124  | 0     |
| FHOD1    | 3.758  | 8.59  |
| FHOD3    | 4.942  | 0.07  |
| FIBCD1   | 3.179  | 0     |
| FIBP     | 1.584  | 36.37 |
| FIGF     | 2.111  | 0     |
| FIGLA    | 0.722  | 0     |
| FIGN     | 4.535  | 0     |
| FIGNL1   | 6.97   | 0.91  |
| FILIP1   | 4.622  | 0.03  |
| FILIP1L  | 6.987  | 0.05  |
| FIP1L1   | 2.154  | 22.53 |
| FIS1     | 1.793  | 29.74 |
| FIZ1     | 2.651  | 7.18  |
| FJX1     | 2.359  | 0.11  |

|          |        |        |
|----------|--------|--------|
| FKBP10   | 2.644  | 0.06   |
| FKBP11   | 0.702  | 10.92  |
| FKBP14   | 4.494  | 0.26   |
| FKBP15   | 4.588  | 13.86  |
| FKBP1A   | 1.941  | 91.31  |
| FKBP1B   | 1.571  | 0.11   |
| FKBP1C   | 16.372 | 0.93   |
| FKBP2    | 0.908  | 48.34  |
| FKBP3    | 1.378  | 20.85  |
| FKBP4    | 2.233  | 8.97   |
| FKBP5    | 3.772  | 28.43  |
| FKBP6    | 2.986  | 0.85   |
| FKBP7    | 1.355  | 0.81   |
| FKBP8    | 1.766  | 156.78 |
| FKBP9    | 6.852  | 3.38   |
| FKBP9L   | 4.902  | 0.7    |
| FKBPL    | 2.688  | 9.37   |
| FKHL18   | 1.318  | 0      |
| FKRP     | 3.702  | 2.93   |
| FKSG2    | 0.521  | 1.29   |
| FKSG24   | 1.275  | 7.07   |
| FKSG30   | 1.401  | 1.08   |
| FKSG43   | 1.8    | 2.38   |
| FKSG44   | 3.67   | 19     |
| FKSG74   | 1.378  | 0      |
| FKSG83   | 1.165  | 0      |
| FLAD1    | 2.474  | 15.83  |
| FLCN     | 4.139  | 3.75   |
| FLG      | 12.747 | 0.01   |
| FLI1     | 2.952  | 45.57  |
| FLII     | 4.163  | 32.05  |
| FLJ00038 | 0.795  | 4.13   |
| FLJ10081 | 5.249  | 8.07   |
| FLJ10120 | 11.659 | 0.18   |
| FLJ10154 | 4.009  | 36.87  |
| FLJ10159 | 4.238  | 0.31   |
| FLJ10213 | 1.679  | 0.5    |
| FLJ10241 | 1.692  | 28.03  |
| FLJ10292 | 2.579  | 3.2    |
| FLJ10324 | 7.348  | 0.27   |
| FLJ10357 | 5.458  | 1.48   |
| FLJ10404 | 4.6    | 11.34  |
| FLJ10490 | 0.743  | 0.57   |
| FLJ10661 | 2.572  | 0.49   |
| FLJ10769 | 2.659  | 10.89  |
| FLJ10781 | 3.653  | 0      |
| FLJ10815 | 3.524  | 5.23   |
| FLJ10847 | 3.279  | 0      |
| FLJ10916 | 2.049  | 0.08   |
| FLJ10986 | 1.896  | 4.09   |



|          |       |       |
|----------|-------|-------|
| FLJ11151 | 2.845 | 4.38  |
| FLJ11171 | 3.956 | 3.72  |
| FLJ11184 | 1.748 | 5.01  |
| FLJ11235 | 2.022 | 0     |
| FLJ11286 | 2.302 | 22.28 |
| FLJ11506 | 2.756 | 9.66  |
| FLJ11783 | 1.493 | 0     |
| FLJ12331 | 2.057 | 0.13  |
| FLJ12529 | 3.497 | 46.44 |
| FLJ12595 | 1.904 | 1.81  |
| FLJ12684 | 2.744 | 0     |
| FLJ12716 | 5.568 | 4.23  |
| FLJ12886 | 2.209 | 13.35 |
| FLJ12949 | 3.235 | 19.16 |
| FLJ12993 | 1.888 | 9.99  |
| FLJ13195 | 4.216 | 0.98  |
| FLJ13197 | 2.368 | 0.82  |
| FLJ13224 | 1.63  | 0.05  |
| FLJ13231 | 8.441 | 1.35  |
| FLJ13236 | 1.839 | 0     |
| FLJ13305 | 1.929 | 0.31  |
| FLJ13611 | 2.724 | 2.75  |
| FLJ14082 | 3.56  | 0.03  |
| FLJ14107 | 1.792 | 0     |
| FLJ14154 | 2.553 | 14.12 |
| FLJ14186 | 3.845 | 0.68  |
| FLJ14213 | 3.93  | 11.53 |
| FLJ14397 | 2.835 | 1.36  |
| FLJ14668 | 1.787 | 11.74 |
| FLJ14712 | 6.328 | 0     |
| FLJ14803 | 6.712 | 1.87  |
| FLJ14816 | 1.787 | 0     |
| FLJ14959 | 2.578 | 2.06  |
| FLJ16008 | 4.685 | 0     |
| FLJ16124 | 1.823 | 0     |
| FLJ16126 | 1.983 | 0     |
| FLJ16165 | 2.311 | 0     |
| FLJ16171 | 2.143 | 0.48  |
| FLJ16237 | 4.95  | 0     |
| FLJ16287 | 3.185 | 1.24  |
| FLJ16331 | 1.78  | 0.28  |
| FLJ16369 | 1.164 | 0     |
| FLJ16423 | 0.405 | 0.21  |
| FLJ16478 | 1.976 | 0.04  |
| FLJ16641 | 2.881 | 0     |
| FLJ16686 | 2.346 | 0     |
| FLJ16734 | 4.436 | 0     |
| FLJ16793 | 2.841 | 1.48  |
| FLJ20021 | 1.138 | 7.26  |
| FLJ20035 | 6.015 | 1.52  |

|          |       |       |
|----------|-------|-------|
| FLJ20054 | 2.012 | 0.5   |
| FLJ20105 | 8.175 | 0.44  |
| FLJ20152 | 3.58  | 0.12  |
| FLJ20160 | 4.293 | 4.12  |
| FLJ20184 | 1.437 | 0     |
| FLJ20186 | 4.38  | 12.45 |
| FLJ20254 | 2.7   | 21.5  |
| FLJ20273 | 4.009 | 11.17 |
| FLJ20294 | 5.108 | 27.39 |
| FLJ20309 | 4.04  | 1.98  |
| FLJ20323 | 6.114 | 2.66  |
| FLJ20366 | 3.43  | 0.12  |
| FLJ20433 | 2.772 | 1.52  |
| FLJ20444 | 3.768 | 0.04  |
| FLJ20464 | 0.7   | 1.44  |
| FLJ20489 | 1.927 | 23.3  |
| FLJ20581 | 2.428 | 0     |
| FLJ20628 | 1.834 | 3.99  |
| FLJ20674 | 4.244 | 18.92 |
| FLJ20699 | 2.566 | 8.34  |
| FLJ20850 | 2.275 | 13.33 |
| FLJ20920 | 2.157 | 13.74 |
| FLJ21062 | 6.076 | 0     |
| FLJ21075 | 1.294 | 0     |
| FLJ21438 | 3.379 | 38.29 |
| FLJ21511 | 2.471 | 0     |
| FLJ21687 | 2.991 | 0.37  |
| FLJ21767 | 3.804 | 7.55  |
| FLJ21839 | 4.445 | 44.02 |
| FLJ21865 | 2.728 | 5.77  |
| FLJ21908 | 2.258 | 5.59  |
| FLJ21963 | 3.033 | 0     |
| FLJ21986 | 10.55 | 0.65  |
| FLJ22028 | 3.169 | 1.52  |
| FLJ22184 | 3.773 | 0     |
| FLJ22222 | 1.85  | 7.15  |
| FLJ22374 | 5.466 | 0.77  |
| FLJ22447 | 1.312 | 0.32  |
| FLJ22531 | 2.135 | 1.03  |
| FLJ22639 | 1.301 | 0.65  |
| FLJ22655 | 1.134 | 0     |
| FLJ22659 | 0.535 | 0.48  |
| FLJ22662 | 2.561 | 5.1   |
| FLJ22671 | 1.958 | 0     |
| FLJ22675 | 1.191 | 0     |
| FLJ22763 | 0.738 | 0     |
| FLJ22795 | 2.546 | 0     |
| FLJ23049 | 3.232 | 0     |
| FLJ23152 | 2.085 | 0     |
| FLJ23356 | 1.611 | 0.99  |

|          |        |       |
|----------|--------|-------|
| FLJ23577 | 7.154  | 0.42  |
| FLJ23588 | 4.867  | 0.02  |
| FLJ23834 | 7.626  | 0.16  |
| FLJ23861 | 5.41   | 1.39  |
| FLJ25006 | 1.433  | 1.11  |
| FLJ25037 | 5.092  | 0.08  |
| FLJ25076 | 4.419  | 0.02  |
| FLJ25328 | 1.687  | 0     |
| FLJ25371 | 0.809  | 0     |
| FLJ25416 | 3.533  | 0.76  |
| FLJ25439 | 1.225  | 0.07  |
| FLJ25476 | 3.106  | 26.5  |
| FLJ25680 | 1.295  | 0     |
| FLJ25715 | 1.111  | 0.15  |
| FLJ25758 | 1.424  | 0     |
| FLJ25770 | 1.917  | 0     |
| FLJ25778 | 17.344 | 0.35  |
| FLJ25791 | 1.559  | 0.05  |
| FLJ25801 | 1.3    | 0     |
| FLJ25967 | 2.271  | 0.03  |
| FLJ25996 | 1.828  | 0     |
| FLJ26056 | 1.87   | 0.45  |
| FLJ26245 | 0.356  | 0     |
| FLJ26443 | 2.241  | 0     |
| FLJ26850 | 1.525  | 0     |
| FLJ27255 | 2.002  | 0     |
| FLJ27365 | 2.27   | 0.08  |
| FLJ27505 | 0.459  | 0     |
| FLJ27523 | 1.296  | 0     |
| FLJ30064 | 4.162  | 0.1   |
| FLJ30092 | 11.209 | 4.66  |
| FLJ30277 | 2.179  | 0     |
| FLJ30313 | 2.585  | 0     |
| FLJ30375 | 2.456  | 0     |
| FLJ30403 | 2.663  | 0.73  |
| FLJ30428 | 2.281  | 0     |
| FLJ30430 | 0.458  | 0     |
| FLJ30851 | 2.2    | 0     |
| FLJ30934 | 1.705  | 3.16  |
| FLJ31033 | 7.127  | 1.38  |
| FLJ31222 | 1.954  | 0.04  |
| FLJ31438 | 2.248  | 0.56  |
| FLJ31485 | 0.63   | 0     |
| FLJ31568 | 2.138  | 0.04  |
| FLJ31659 | 2.174  | 0     |
| FLJ31818 | 6.006  | 1.22  |
| FLJ31951 | 3.6    | 11.25 |
| FLJ32011 | 2.32   | 0     |
| FLJ32063 | 3.197  | 0     |
| FLJ32065 | 0.937  | 0.54  |

|          |       |      |
|----------|-------|------|
| FLJ32214 | 2.214 | 0    |
| FLJ32252 | 2.864 | 0    |
| FLJ32312 | 2.097 | 0.68 |
| FLJ32447 | 1.699 | 0    |
| FLJ32549 | 2.576 | 1.34 |
| FLJ32569 | 2.149 | 1.53 |
| FLJ32658 | 2.052 | 0.16 |
| FLJ32679 | 2.802 | 0    |
| FLJ32682 | 2.421 | 0    |
| FLJ32745 | 2.196 | 0.61 |
| FLJ32756 | 1.972 | 0.17 |
| FLJ32784 | 3.725 | 0    |
| FLJ32810 | 4.82  | 0.26 |
| FLJ32894 | 1.71  | 0.15 |
| FLJ32955 | 1.832 | 0    |
| FLJ33360 | 2.419 | 0.03 |
| FLJ33534 | 2.068 | 0    |
| FLJ33544 | 2.148 | 0    |
| FLJ33590 | 2.163 | 0.78 |
| FLJ33790 | 1.497 | 1.57 |
| FLJ34047 | 1.161 | 0    |
| FLJ34048 | 1.304 | 0    |
| FLJ34503 | 2.255 | 0    |
| FLJ34521 | 2.12  | 0.04 |
| FLJ34651 | 1.99  | 0.17 |
| FLJ34931 | 7.044 | 0    |
| FLJ35220 | 2.815 | 2.34 |
| FLJ35348 | 5.734 | 6.05 |
| FLJ35379 | 1.168 | 0.07 |
| FLJ35409 | 2.102 | 0    |
| FLJ35424 | 2.367 | 0    |
| FLJ35530 | 2.577 | 0.36 |
| FLJ35695 | 2.043 | 0    |
| FLJ35767 | 1.907 | 0    |
| FLJ35773 | 2.107 | 0.24 |
| FLJ35776 | 1.966 | 0.25 |
| FLJ35785 | 5.596 | 0    |
| FLJ35816 | 2.165 | 0.04 |
| FLJ35848 | 4.069 | 0.02 |
| FLJ35880 | 2.689 | 0    |
| FLJ35934 | 1.871 | 1.26 |
| FLJ35946 | 0.687 | 0    |
| FLJ36031 | 4.886 | 2.14 |
| FLJ36032 | 0.656 | 0    |
| FLJ36070 | 1.825 | 0.32 |
| FLJ36116 | 0.207 | 0    |
| FLJ36144 | 2.09  | 0    |
| FLJ36157 | 5.334 | 0    |
| FLJ36166 | 7.324 | 0.05 |
| FLJ36208 | 2.044 | 5.64 |

|          |       |       |
|----------|-------|-------|
| FLJ36492 | 8.687 | 0.03  |
| FLJ36644 | 2.825 | 0     |
| FLJ36840 | 2.518 | 0     |
| FLJ36848 | 3.004 | 0.59  |
| FLJ36874 | 3.636 | 11.68 |
| FLJ37034 | 2.983 | 0.45  |
| FLJ37060 | 2.001 | 0     |
| FLJ37078 | 4.488 | 0.13  |
| FLJ37228 | 0.396 | 0     |
| FLJ37357 | 2.435 | 0.14  |
| FLJ37396 | 2.259 | 0     |
| FLJ37440 | 2.299 | 0.11  |
| FLJ37464 | 2.061 | 0.9   |
| FLJ37512 | 0.876 | 0     |
| FLJ37538 | 7.162 | 0.58  |
| FLJ37543 | 2.97  | 0.06  |
| FLJ37644 | 0.34  | 0     |
| FLJ37673 | 1.165 | 4.34  |
| FLJ37786 | 2.197 | 0     |
| FLJ37953 | 5.134 | 1.41  |
| FLJ38020 | 2.289 | 0.11  |
| FLJ38028 | 0.829 | 0     |
| FLJ38377 | 3.168 | 0     |
| FLJ38379 | 2.323 | 1.23  |
| FLJ38482 | 2.225 | 3.75  |
| FLJ38576 | 2.721 | 0.13  |
| FLJ38596 | 2.125 | 0     |
| FLJ38668 | 2.527 | 0.03  |
| FLJ38717 | 2.617 | 0.29  |
| FLJ38723 | 2.919 | 0     |
| FLJ38894 | 1.789 | 0     |
| FLJ38973 | 3.678 | 1.03  |
| FLJ38984 | 2.934 | 5.63  |
| FLJ39061 | 2.441 | 0     |
| FLJ39080 | 2.125 | 0     |
| FLJ39198 | 3.89  | 0     |
| FLJ39237 | 5.862 | 0     |
| FLJ39378 | 2.1   | 3.01  |
| FLJ39501 | 2.607 | 0     |
| FLJ39502 | 3.786 | 0.29  |
| FLJ39531 | 3.046 | 0     |
| FLJ39575 | 3.39  | 0.08  |
| FLJ39632 | 4.779 | 1.32  |
| FLJ39639 | 2.486 | 0.82  |
| FLJ39653 | 2.242 | 68.57 |
| FLJ39660 | 3.685 | 0.25  |
| FLJ39739 | 2.212 | 0     |
| FLJ39743 | 3.298 | 0     |
| FLJ39779 | 1.727 | 2.88  |
| FLJ39822 | 1.621 | 0     |

|          |       |       |
|----------|-------|-------|
| FLJ40113 | 1.923 | 0.22  |
| FLJ40125 | 1.718 | 0.05  |
| FLJ40142 | 2.104 | 4.21  |
| FLJ40172 | 2.048 | 0.04  |
| FLJ40176 | 7.453 | 0.07  |
| FLJ40194 | 2.317 | 0     |
| FLJ40235 | 1.706 | 0     |
| FLJ40243 | 5.239 | 0.03  |
| FLJ40244 | 0.77  | 0     |
| FLJ40288 | 3.996 | 0     |
| FLJ40292 | 1.749 | 0     |
| FLJ40296 | 1.847 | 0     |
| FLJ40298 | 1.713 | 0     |
| FLJ40330 | 2.295 | 0     |
| FLJ40411 | 3.761 | 0     |
| FLJ40434 | 1     | 0     |
| FLJ40448 | 2.137 | 0     |
| FLJ40453 | 1.726 | 0     |
| FLJ40504 | 1.95  | 0     |
| FLJ40606 | 2.48  | 0.41  |
| FLJ40722 | 5.91  | 0.09  |
| FLJ40852 | 4.524 | 0.26  |
| FLJ40869 | 3.024 | 2.29  |
| FLJ40941 | 0.973 | 0     |
| FLJ41046 | 2.695 | 0     |
| FLJ41047 | 1.986 | 0     |
| FLJ41170 | 1.725 | 0     |
| FLJ41200 | 2.317 | 0     |
| FLJ41278 | 0.629 | 0     |
| FLJ41309 | 2.511 | 0.5   |
| FLJ41352 | 3.842 | 10.83 |
| FLJ41423 | 2.597 | 0     |
| FLJ41481 | 1.949 | 0     |
| FLJ41484 | 3.249 | 2.98  |
| FLJ41603 | 4.865 | 0.17  |
| FLJ41649 | 3.122 | 0.35  |
| FLJ41733 | 2.816 | 0     |
| FLJ41766 | 3.332 | 0     |
| FLJ41821 | 2.209 | 0     |
| FLJ41841 | 3.232 | 0     |
| FLJ41856 | 3.016 | 0     |
| FLJ41993 | 3.635 | 0     |
| FLJ42022 | 2.222 | 0.11  |
| FLJ42102 | 2.162 | 0     |
| FLJ42117 | 2.551 | 0.07  |
| FLJ42133 | 2.112 | 0     |
| FLJ42177 | 2.499 | 0.14  |
| FLJ42220 | 0.582 | 0     |
| FLJ42258 | 2.299 | 0.7   |
| FLJ42280 | 5.414 | 0     |

|          |       |       |
|----------|-------|-------|
| FLJ42289 | 1.56  | 0.11  |
| FLJ42291 | 5.248 | 0.06  |
| FLJ42393 | 2.355 | 0.07  |
| FLJ42418 | 2.13  | 0     |
| FLJ42562 | 3.023 | 0     |
| FLJ42627 | 3.535 | 1.43  |
| FLJ42842 | 2.645 | 0     |
| FLJ42953 | 1.832 | 0     |
| FLJ42957 | 1.597 | 0.42  |
| FLJ42986 | 1.312 | 1.03  |
| FLJ43080 | 4.217 | 0     |
| FLJ43093 | 1.787 | 0.19  |
| FLJ43276 | 2.15  | 0.2   |
| FLJ43339 | 7.526 | 24.08 |
| FLJ43390 | 2.927 | 0     |
| FLJ43505 | 1.994 | 0.04  |
| FLJ43582 | 2.25  | 0     |
| FLJ43681 | 2.381 | 0     |
| FLJ43692 | 3.836 | 0.11  |
| FLJ43752 | 2.107 | 0.04  |
| FLJ43763 | 2.007 | 0     |
| FLJ43806 | 4.13  | 0     |
| FLJ43826 | 3.229 | 0     |
| FLJ43859 | 4.871 | 0     |
| FLJ43860 | 4.164 | 0.02  |
| FLJ43879 | 3.489 | 0     |
| FLJ43950 | 4.762 | 0     |
| FLJ43980 | 3.706 | 0     |
| FLJ43987 | 3.045 | 0     |
| FLJ44005 | 3.524 | 2.82  |
| FLJ44006 | 3.026 | 0     |
| FLJ44048 | 4.293 | 0     |
| FLJ44054 | 2.928 | 0     |
| FLJ44060 | 6.146 | 0     |
| FLJ44076 | 3.36  | 0.03  |
| FLJ44124 | 6.024 | 0.15  |
| FLJ44290 | 2.048 | 0.04  |
| FLJ44313 | 2.077 | 0.08  |
| FLJ44379 | 1.684 | 0     |
| FLJ44385 | 3.894 | 0.04  |
| FLJ44450 | 1.599 | 0     |
| FLJ44451 | 0.512 | 0.33  |
| FLJ44477 | 2.433 | 0.03  |
| FLJ44606 | 0.708 | 0.24  |
| FLJ44635 | 2.268 | 50.66 |
| FLJ44653 | 2.385 | 0.11  |
| FLJ44691 | 3.78  | 0.04  |
| FLJ44790 | 3.21  | 0     |
| FLJ44796 | 3.756 | 0.07  |
| FLJ44815 | 3.997 | 0     |

|          |        |      |
|----------|--------|------|
| FLJ44817 | 1.949  | 0    |
| FLJ44838 | 4.199  | 0    |
| FLJ44861 | 1.577  | 0    |
| FLJ44881 | 2.337  | 0    |
| FLJ44894 | 3.33   | 0.6  |
| FLJ44955 | 2.704  | 0.19 |
| FLJ44968 | 0.982  | 3.6  |
| FLJ45032 | 3.962  | 0.42 |
| FLJ45079 | 4.678  | 0    |
| FLJ45121 | 4.521  | 1.92 |
| FLJ45139 | 3.823  | 0    |
| FLJ45187 | 6.328  | 0.05 |
| FLJ45224 | 3.706  | 0    |
| FLJ45244 | 2.331  | 0.47 |
| FLJ45248 | 2.77   | 0.25 |
| FLJ45256 | 2.907  | 0    |
| FLJ45337 | 4.063  | 0    |
| FLJ45340 | 6.962  | 0.48 |
| FLJ45422 | 13.761 | 0.06 |
| FLJ45445 | 4.298  | 0    |
| FLJ45455 | 1.772  | 0.99 |
| FLJ45508 | 1.84   | 0    |
| FLJ45513 | 0.905  | 0.75 |
| FLJ45530 | 3.186  | 0.48 |
| FLJ45537 | 3.409  | 0    |
| FLJ45557 | 4.407  | 0    |
| FLJ45684 | 2.896  | 0.12 |
| FLJ45717 | 2.258  | 0.03 |
| FLJ45721 | 2.509  | 0    |
| FLJ45743 | 2.558  | 0    |
| FLJ45803 | 5.443  | 0.23 |
| FLJ45825 | 3.815  | 0.04 |
| FLJ45831 | 3.008  | 0    |
| FLJ45872 | 4.146  | 0    |
| FLJ45909 | 3.021  | 1.84 |
| FLJ45910 | 1.996  | 0    |
| FLJ45964 | 3.7    | 0    |
| FLJ45966 | 3.204  | 0    |
| FLJ45974 | 6.968  | 0    |
| FLJ45983 | 2.214  | 0    |
| FLJ45994 | 1.352  | 0    |
| FLJ46010 | 2.375  | 0    |
| FLJ46020 | 2.261  | 0.11 |
| FLJ46026 | 3.133  | 0.35 |
| FLJ46082 | 1.789  | 0    |
| FLJ46109 | 8.105  | 0.01 |
| FLJ46111 | 1.828  | 0    |
| FLJ46120 | 3.051  | 0    |
| FLJ46121 | 1.802  | 0    |
| FLJ46210 | 2.657  | 0    |



|          |        |       |
|----------|--------|-------|
| FLJ46266 | 3.099  | 0     |
| FLJ46284 | 3.37   | 0     |
| FLJ46300 | 3.35   | 0     |
| FLJ46309 | 3.032  | 0     |
| FLJ46321 | 4.828  | 0     |
| FLJ46347 | 3.129  | 0     |
| FLJ46358 | 5.065  | 0     |
| FLJ46361 | 21.25  | 0     |
| FLJ46363 | 3.957  | 0     |
| FLJ46365 | 3.602  | 0.03  |
| FLJ46481 | 3.178  | 0     |
| FLJ46688 | 3.221  | 0     |
| FLJ46831 | 2.764  | 0     |
| FLJ46836 | 3.258  | 0     |
| FLJ46838 | 2.243  | 0.15  |
| FLJ90086 | 4.337  | 0.15  |
| FLJ90650 | 4.502  | 0     |
| FLJ90680 | 2.17   | 0     |
| FLJ90709 | 2.463  | 3.9   |
| FLJ90757 | 3.306  | 10.98 |
| FLNA     | 8.368  | 12.29 |
| FLNB     | 9.429  | 31.47 |
| FLNC     | 18.284 | 0.03  |
| FLOT1    | 5.49   | 0     |
| FLOT2    | 2.632  | 51.17 |
| FLRT1    | 3.247  | 0.15  |
| FLRT2    | 7.179  | 0.01  |
| FLRT3    | 4.188  | 0     |
| FLT1     | 5.783  | 2.4   |
| FLT3     | 3.476  | 2.23  |
| FLT3LG   | 1.036  | 6.91  |
| FLT4     | 5.33   | 2.77  |
| FLVCR    | 1.99   | 1.22  |
| FLYWCH1  | 5.118  | 7.06  |
| FMN1     | 3.757  | 0.54  |
| FMN2     | 6.633  | 0.01  |
| FMNL1    | 3.963  | 28.42 |
| FMNL2    | 5.575  | 5.52  |
| FMNL3    | 12.364 | 26.25 |
| FMO1     | 2.126  | 0     |
| FMO2     | 5.181  | 0     |
| FMO3     | 2.139  | 0.04  |
| FMO4     | 2.139  | 0.99  |
| FMO5     | 2.324  | 0.58  |
| FMO6P    | 25.949 | 0     |
| FMOD     | 2.986  | 0.96  |
| FMR1     | 4.335  | 3.42  |
| FMR1NB   | 1.019  | 0     |
| FN1      | 9.665  | 0.24  |
| FN3K     | 1.377  | 2.02  |

|         |       |       |
|---------|-------|-------|
| FN3KRP  | 1.769 | 14.81 |
| FNBP1   | 6.31  | 47.13 |
| FNBP1L  | 7.595 | 2.69  |
| FNBP4   | 3.986 | 16.63 |
| FNDC1   | 6.551 | 0     |
| FNDC3A  | 6.001 | 2.29  |
| FNDC3B  | 6.865 | 0.05  |
| FNDC4   | 1.631 | 0.1   |
| FNDC5   | 2.657 | 0.29  |
| FNDC7   | 2.384 | 0     |
| FNDC8   | 1.355 | 0.19  |
| FNIP1   | 6.567 | 1.11  |
| FNTA    | 1.942 | 26.54 |
| FNTAL1  | 1.636 | 4.01  |
| FNTAL2  | 1.141 | 2.21  |
| FNTB    | 2.819 | 2.6   |
| FOLH1   | 2.635 | 0.19  |
| FOLH2   | 0.155 | 0     |
| FOLR1   | 2     | 0     |
| FOLR1P  | 1.068 | 0     |
| FOLR2   | 1.102 | 19.72 |
| FOLR3   | 0.845 | 0.4   |
| FOS     | 2.084 | 92.28 |
| FOSB    | 3.775 | 30.26 |
| FOSL1   | 1.668 | 0.71  |
| FOSL2   | 3.991 | 3.9   |
| FOXA1   | 3.112 | 0     |
| FOXA2   | 2.433 | 0     |
| FOXA3   | 1.989 | 0.04  |
| FOXB1   | 1.008 | 0     |
| FOXB2   | 1.299 | 0     |
| FOXC1   | 1.662 | 0.05  |
| FOXC2   | 1.506 | 0     |
| FOXD1   | 2.27  | 0     |
| FOXD2   | 4.675 | 0.45  |
| FOXD3   | 1.437 | 0.24  |
| FOXD4   | 2.186 | 0     |
| FOXD4L1 | 2.25  | 0     |
| FOXD4L2 | 2.218 | 0     |
| FOXD4L4 | 3.109 | 0     |
| FOXD4L6 | 2.218 | 0     |
| FOXE1   | 3.461 | 0     |
| FOXE3   | 1.981 | 0     |
| FOXF1   | 2.514 | 0     |
| FOXF2   | 2.187 | 0     |
| FOXG1B  | 2.585 | 0     |
| FOXH1   | 1.8   | 0     |
| FOXI1   | 2.572 | 0     |
| FOXJ1   | 2.376 | 0.14  |
| FOXJ2   | 5.482 | 6.53  |

|         |        |       |
|---------|--------|-------|
| FOXJ3   | 5.231  | 11.24 |
| FOXK1   | 22.382 | 2.37  |
| FOXK2   | 3.865  | 17.57 |
| FOXL1   | 1.038  | 0     |
| FOXL2   | 2.736  | 0     |
| FOXM1   | 3.626  | 14.66 |
| FOXN1   | 2.697  | 0     |
| FOXN2   | 5.388  | 1.13  |
| FOXN4   | 2.958  | 0     |
| FOXO1A  | 5.722  | 12.82 |
| FOXO1B  | 2.102  | 0     |
| FOXO3A  | 3.654  | 4.49  |
| FOXO3B  | 0.618  | 0.41  |
| FOXP1   | 7.128  | 24.33 |
| FOXP2   | 5.852  | 0.07  |
| FOXP3   | 1.869  | 0.04  |
| FOXP4   | 6.413  | 5.08  |
| FOXQ1   | 2.309  | 0     |
| FOXR1   | 1.153  | 0     |
| FOXR2   | 1.926  | 0     |
| FOXRED1 | 1.951  | 12.87 |
| FOXRED2 | 3.932  | 8.89  |
| FPGS    | 3.09   | 66.55 |
| FPGT    | 3.426  | 0.93  |
| FPR1    | 1.317  | 0.96  |
| FPRL1   | 2.042  | 0.37  |
| FPRL2   | 2.517  | 0.1   |
| FRAG1   | 1.952  | 13.81 |
| FRAP1   | 8.679  | 7.61  |
| FRAS1   | 15.209 | 0     |
| FRAT1   | 2.651  | 2.8   |
| FRAT2   | 2.205  | 3.09  |
| FRDAP   | 0.685  | 0     |
| FREM1   | 6.17   | 0.02  |
| FREM2   | 9.51   | 0     |
| FREM3   | 7.179  | 0     |
| FREQ    | 4.314  | 0.09  |
| FRG1    | 1.043  | 22.61 |
| FRG2    | 2.084  | 2.87  |
| FRK     | 2.849  | 0     |
| FRMD1   | 3.005  | 0     |
| FRMD3   | 2.534  | 0.03  |
| FRMD4A  | 6.815  | 2.37  |
| FRMD4B  | 6.862  | 8.64  |
| FRMD5   | 2.243  | 0     |
| FRMD6   | 4.504  | 0.06  |
| FRMD7   | 3.2    | 0     |
| FRMPD1  | 4.916  | 0     |
| FRMPD2  | 6.45   | 0     |
| FRMPD3  | 7.309  | 0     |

|        |        |        |
|--------|--------|--------|
| FRMPD4 | 6.352  | 0      |
| FRRS1  | 2.678  | 0.1    |
| FRS2   | 1.782  | 1.14   |
| FRS3   | 2.166  | 3.89   |
| FRY    | 10.71  | 0.05   |
| FRYL   | 2.365  | 0.07   |
| FRZB   | 2.035  | 0.04   |
| FSCN1  | 5.655  | 44.15  |
| FSCN2  | 1.527  | 0      |
| FSCN3  | 3.766  | 0      |
| FSD1   | 1.742  | 0      |
| FSD1L  | 4.532  | 0.17   |
| FSD2   | 2.679  | 0      |
| FSHB   | 1.969  | 0      |
| FSHR   | 2.382  | 0      |
| FSIP1  | 2.809  | 0.09   |
| FSIP2  | 2.726  | 0.06   |
| FST    | 1.529  | 0      |
| FSTL1  | 3.682  | 0.53   |
| FSTL3  | 2.5    | 6.8    |
| FSTL4  | 5.382  | 2.38   |
| FSTL5  | 4.83   | 0      |
| FTCD   | 2.113  | 0.04   |
| FTH1   | 1.229  | 185.74 |
| FTHL1  | 0.896  | 0.28   |
| FTHL10 | 0.805  | 1.25   |
| FTHL11 | 0.886  | 0.19   |
| FTHL12 | 0.912  | 2.22   |
| FTHL16 | 0.939  | 0.54   |
| FTHL17 | 0.813  | 0      |
| FTHL2  | 0.568  | 0.14   |
| FTHL3  | 0.954  | 0.62   |
| FTHL4  | 0.912  | 0.55   |
| FTHL7  | 0.91   | 2.59   |
| FTHL8  | 0.909  | 0.47   |
| FTHP1  | 40.464 | 0.01   |
| FTHP2  | 0.812  | 0.31   |
| FTL    | 0.871  | 773.59 |
| FTLL1  | 0.978  | 62.45  |
| FTLP   | 0.827  | 0      |
| FTMT   | 0.879  | 0      |
| FTO    | 4.294  | 10.46  |
| FTSJ1  | 2.211  | 11.85  |
| FTSJ2  | 3.202  | 10.55  |
| FTSJ3  | 2.984  | 20.95  |
| FUBP1  | 2.884  | 43.31  |
| FUBP3  | 3.13   | 12.08  |
| FUCA1  | 2.031  | 47.82  |
| FUCA1P | 2.028  | 0      |
| FUCA2  | 2.098  | 0.28   |

|          |       |        |
|----------|-------|--------|
| FUK      | 3.907 | 3.47   |
| FUNDC1   | 1.147 | 9.84   |
| FUNDC2   | 2.964 | 15.52  |
| FUNDC2P  | 1.126 | 3.52   |
| FURIN    | 4.18  | 29.8   |
| FUS      | 2.419 | 142.49 |
| FUSIP1   | 4.199 | 9.13   |
| FUSSEL18 | 0.891 | 0      |
| FUT1     | 4.246 | 0.16   |
| FUT10    | 3.549 | 2.21   |
| FUT11    | 2.056 | 3.56   |
| FUT2     | 3.105 | 0.46   |
| FUT3     | 2.584 | 0.03   |
| FUT4     | 5.938 | 1.78   |
| FUT5     | 1.988 | 0      |
| FUT6     | 3.11  | 0      |
| FUT7     | 2.584 | 18.75  |
| FUT8     | 4.325 | 2.32   |
| FUT9     | 3.042 | 0      |
| FUZ      | 1.621 | 8.68   |
| FVT1     | 2.288 | 7.58   |
| FXC1     | 1.469 | 9.92   |
| FXN      | 3.793 | 4.15   |
| FXR1     | 4.288 | 21.49  |
| FXR2     | 2.844 | 11.02  |
| FXYD1    | 0.614 | 1.37   |
| FXYD2    | 0.644 | 1.83   |
| FXYD3    | 1.579 | 0.05   |
| FXYD4    | 0.771 | 0      |
| FXYD5    | 1.717 | 278.36 |
| FXYD6    | 1.675 | 7.55   |
| FXYD7    | 0.713 | 1.89   |
| FYB      | 4.828 | 0.33   |
| FYCO1    | 8.497 | 1.45   |
| FYN      | 3.428 | 114.19 |
| FYTTD1   | 4.109 | 15.21  |
| FZD1     | 8.7   | 1.48   |
| FZD10    | 3.254 | 0.03   |
| FZD2     | 1.983 | 4.59   |
| FZD3     | 3.933 | 0.04   |
| FZD4     | 7.383 | 0.58   |
| FZD5     | 2.561 | 0.1    |
| FZD6     | 3.754 | 3.93   |
| FZD7     | 3.851 | 0.43   |
| FZD8     | 3.186 | 3.23   |
| FZD9     | 4.684 | 0.02   |
| FZR1     | 5.007 | 12.13  |
| G0S2     | 0.866 | 0.09   |
| G13P1    | 0.825 | 0      |
| G3BP1    | 3.356 | 29.54  |

|            |        |        |
|------------|--------|--------|
| G3BP2      | 4.451  | 12.59  |
| G6PC       | 3.096  | 0      |
| G6PC2      | 1.068  | 0      |
| G6PC3      | 1.558  | 42.61  |
| G6PD       | 2.631  | 39.76  |
| GAA        | 3.847  | 12.79  |
| GAB1       | 4.876  | 34.57  |
| GAB2       | 6.429  | 31.05  |
| GAB3       | 4.718  | 5.55   |
| GAB4       | 2.63   | 0.03   |
| GABARAP    | 0.893  | 276.76 |
| GABARAPL1  | 1.87   | 1.85   |
| GABARAPL2  | 1.002  | 42.88  |
| GABARAPL3  | 1.851  | 0.04   |
| GABBR1     | 19.626 | 0.01   |
| GABBR2     | 5.786  | 0      |
| GABPA      | 4.381  | 3.39   |
| GABPB2     | 4.296  | 17.14  |
| GABRA1     | 3.672  | 0      |
| GABRA2     | 2.179  | 0      |
| GABRA3     | 1.891  | 0      |
| GABRA4     | 11.129 | 0      |
| GABRA5     | 1.515  | 0      |
| GABRA6     | 1.73   | 0      |
| GABRB1     | 1.925  | 0      |
| GABRB2     | 1.974  | 0      |
| GABRB3     | 6.096  | 6.98   |
| GABRD      | 1.848  | 3.33   |
| GABRE      | 4.766  | 0.02   |
| GABRG1     | 6.769  | 0.03   |
| GABRG2     | 5.103  | 0      |
| GABRG3     | 0.93   | 0      |
| GABRP      | 3.268  | 0      |
| GABRQ      | 2      | 0      |
| GABRR1     | 1.976  | 0      |
| GABRR2     | 1.613  | 0.32   |
| GAD1       | 4.03   | 0.08   |
| GAD2       | 2.462  | 1.33   |
| GADD45A    | 1.355  | 76.65  |
| GADD45B    | 1.363  | 28.86  |
| GADD45G    | 1.065  | 0.55   |
| GADD45GIP1 | 0.743  | 90.93  |
| GADL1      | 3.084  | 0      |
| GAGE1      | 0.639  | 0      |
| GAGE10     | 0.396  | 0      |
| GAGE12B    | 0.627  | 0      |
| GAGE12D    | 0.627  | 0      |
| GAGE12G    | 0.627  | 0      |
| GAGE2      | 0.528  | 0      |
| GAGE4      | 0.527  | 0      |

|              |       |         |
|--------------|-------|---------|
| GAGE5        | 0.522 | 0       |
| GAGE6        | 0.526 | 0       |
| GAGE7        | 0.498 | 0       |
| GAGE7B       | 0.502 | 0       |
| GAGE8        | 0.517 | 0       |
| GAK          | 4.331 | 25.66   |
| GAL          | 0.778 | 0       |
| GAL3ST1      | 1.791 | 0.05    |
| GAL3ST2      | 1.583 | 0       |
| GAL3ST3      | 2.103 | 0       |
| GAL3ST4      | 4.76  | 1.47    |
| GALC         | 4.373 | 2.27    |
| GALE         | 1.724 | 4.84    |
| GALK1        | 1.361 | 17.02   |
| GALK2        | 3.359 | 2.33    |
| GALM         | 1.932 | 0.82    |
| GALNAC4S-6ST | 6.193 | 120.95  |
| GALNACT-2    | 3.724 | 2.33    |
| GALNS        | 2.373 | 7.32    |
| GALNT1       | 3.771 | 23.21   |
| GALNT10      | 5.657 | 3.13    |
| GALNT11      | 5.146 | 1.85    |
| GALNT12      | 1.746 | 0.38    |
| GALNT13      | 5.096 | 0       |
| GALNT14      | 2.712 | 27.15   |
| GALNT17      | 3.922 | 0       |
| GALNT2       | 4.458 | 37.94   |
| GALNT3       | 3.871 | 0       |
| GALNT4       | 5.347 | 0.99    |
| GALNT5       | 3.131 | 0.03    |
| GALNT6       | 2.881 | 1.11    |
| GALNT7       | 4.255 | 10.93   |
| GALNT8       | 2.135 | 0       |
| GALNT9       | 1.727 | 0       |
| GALNTL1      | 2.907 | 0.06    |
| GALNTL2      | 3.578 | 0.03    |
| GALNTL4      | 2.504 | 0       |
| GALNTL5      | 3.362 | 0       |
| GALP         | 0.938 | 0       |
| GALR1        | 3.057 | 0       |
| GALR2        | 1.298 | 0       |
| GALR3        | 1.157 | 0       |
| GALT         | 1.335 | 12.18   |
| GAMT         | 1.482 | 25.75   |
| GAN          | 4.677 | 0.18    |
| GANAB        | 4.91  | 103.72  |
| GANC         | 4.586 | 4.13    |
| GAP43        | 1.225 | 0.07    |
| GAPDH        | 1.31  | 1284.12 |
| GAPDHL16     | 1.277 | 0.59    |

|         |       |        |
|---------|-------|--------|
| GAPDHL4 | 1.264 | 1.6    |
| GAPDHP1 | 0.429 | 1.77   |
| GAPDHP2 | 0.993 | 0.93   |
| GAPDHS  | 1.439 | 0.93   |
| GAPVD1  | 6.889 | 6.24   |
| GARNL1  | 9.203 | 0.61   |
| GARNL2P | 7.159 | 0.58   |
| GARNL3  | 3.348 | 0.03   |
| GARNL4  | 6.661 | 5.74   |
| GARS    | 5.49  | 11.6   |
| GART    | 4.274 | 13.93  |
| GAS1    | 2.827 | 0.27   |
| GAS2    | 2.236 | 0.08   |
| GAS2L1  | 4.684 | 3.9    |
| GAS2L2  | 2.709 | 0      |
| GAS2L3  | 2.333 | 0.87   |
| GAS5    | 0.632 | 127.82 |
| GAS6    | 2.689 | 55.07  |
| GAS7    | 8.773 | 5.19   |
| GAS8    | 3.185 | 8.39   |
| GAST    | 0.435 | 0      |
| GATA1   | 1.5   | 1.74   |
| GATA2   | 3.367 | 0.1    |
| GATA3   | 3.213 | 0.24   |
| GATA4   | 3.372 | 0      |
| GATA5   | 2.595 | 0      |
| GATA6   | 3.494 | 0      |
| GATAD1  | 7.91  | 1.3    |
| GATAD2A | 5.003 | 22.71  |
| GATAD2B | 5.773 | 17.23  |
| GATM    | 2.325 | 0.47   |
| GATS    | 6.984 | 5.01   |
| GBA     | 2.888 | 13.65  |
| GBA2    | 3.611 | 10.52  |
| GBA3    | 2.105 | 0      |
| GBAP    | 4.648 | 2.28   |
| GBAS    | 3.948 | 4.31   |
| GBE1    | 2.89  | 7.7    |
| GBF1    | 6.376 | 10.83  |
| GBGT1   | 1.949 | 12.41  |
| GBL     | 1.64  | 24.97  |
| GBP1    | 2.88  | 2.46   |
| GBP2    | 2.595 | 11.62  |
| GBP3    | 2.931 | 1.92   |
| GBP4    | 5.449 | 49.14  |
| GBP5    | 2.407 | 28.7   |
| GBP6    | 2.987 | 1.01   |
| GBP7    | 2.418 | 1.08   |
| GBX2    | 1.335 | 0      |
| GC      | 1.781 | 0      |



|         |        |        |
|---------|--------|--------|
| GCA     | 1.639  | 3.14   |
| GCAT    | 1.459  | 5.89   |
| GCATP   | 1.425  | 1.06   |
| GCC1    | 8.264  | 1.67   |
| GCC2    | 7.124  | 2.07   |
| GCDH    | 2.092  | 11.35  |
| GCET2   | 3.721  | 13.04  |
| GCG     | 1.128  | 0      |
| GCGR    | 2.044  | 0      |
| GCH1    | 5.13   | 1.3    |
| GCHFR   | 0.713  | 12.53  |
| GCK     | 6.61   | 0      |
| GCKR    | 2.189  | 0      |
| GCLC    | 3.717  | 1.74   |
| GCLM    | 3.074  | 3.23   |
| GCM1    | 2.765  | 0      |
| GCM2    | 2.357  | 0      |
| GCN1L1  | 8.668  | 14.49  |
| GCN5L2  | 3.074  | 24.17  |
| GCNT1   | 5.518  | 3.6    |
| GCNT2   | 7.186  | 0.1    |
| GCNT3   | 2.118  | 0.04   |
| GCNT4   | 3.436  | 0      |
| Gcom1   | 16.567 | 0.62   |
| GCS1    | 2.852  | 19.76  |
| GCSH    | 1.161  | 2.47   |
| GDA     | 5.43   | 0      |
| GDAP1   | 1.077  | 0.24   |
| GDAP1L1 | 2.244  | 0      |
| GDAP2   | 2.851  | 1.6    |
| GDF1    | 1.164  | 0.29   |
| GDF10   | 2.674  | 0      |
| GDF11   | 3.987  | 18.99  |
| GDF15   | 1.183  | 1.28   |
| GDF2    | 1.936  | 0      |
| GDF3    | 1.224  | 0      |
| GDF5    | 2.383  | 0      |
| GDF6    | 3.701  | 0      |
| GDF7    | 1.994  | 0      |
| GDF8    | 2.819  | 0      |
| GDF9    | 1.365  | 0.37   |
| GDI1    | 2.219  | 53.94  |
| GDI2    | 2.273  | 210.83 |
| GDI2P   | 4.547  | 3.63   |
| GDNF    | 1.416  | 0      |
| GDPD1   | 1.821  | 0.65   |
| GDPD2   | 2.166  | 0.04   |
| GDPD3   | 1.703  | 1.04   |
| GDPD4   | 2.533  | 0.5    |
| GDPD5   | 3.441  | 2.69   |

|           |       |       |
|-----------|-------|-------|
| GEFT      | 2.972 | 0.08  |
| GEM       | 2.322 | 0     |
| GEMIN4    | 3.446 | 6.55  |
| GEMIN5    | 4.748 | 6.28  |
| GEMIN6    | 0.693 | 7.54  |
| GEMIN7    | 2.073 | 21.54 |
| GEMIN8    | 1.682 | 11.02 |
| GENX-3414 | 2.331 | 2.46  |
| GFAP      | 3.035 | 0     |
| GFER      | 2.409 | 7.94  |
| GF11      | 2.784 | 13.49 |
| GF11B     | 1.789 | 1.32  |
| GFM1      | 3.468 | 6.56  |
| GFM2      | 3.41  | 6.72  |
| GFOD1     | 2.994 | 1.16  |
| GFOD2     | 2.016 | 8.94  |
| GFPT1     | 3.082 | 2.81  |
| GFPT2     | 3.011 | 0.06  |
| GFRA1     | 3.155 | 0     |
| GFRA2     | 2.216 | 0.23  |
| GFRA3     | 1.931 | 0.04  |
| GFRA4     | 2.108 | 0.08  |
| GFRAL     | 1.911 | 0     |
| GGA1      | 4.356 | 6.94  |
| GGA2      | 5.186 | 34.87 |
| GGA3      | 3.846 | 14.3  |
| GGCX      | 3.159 | 5.68  |
| GGH       | 1.269 | 5.31  |
| GGN       | 2.154 | 0.04  |
| GGPS1     | 3.734 | 4.87  |
| GGT1      | 2.695 | 0.09  |
| GGT2      | 2.935 | 0     |
| GGT3      | 2.066 | 0     |
| GGT6      | 2.527 | 0     |
| GGTA1     | 0.693 | 0     |
| GGTA1P    | 1.124 | 0.08  |
| GGTL3     | 2.772 | 1.18  |
| GGTL4     | 1.216 | 0     |
| GGTLA1    | 2.405 | 30.2  |
| GGTLA4    | 1.412 | 0     |
| GH1       | 1.201 | 1.2   |
| GH2       | 2.087 | 0.04  |
| GHDC      | 2.65  | 13.83 |
| GHITM     | 2.376 | 46.13 |
| GHR       | 4.36  | 0.48  |
| GHRH      | 0.454 | 0     |
| GHRHR     | 3.602 | 0     |
| GHRL      | 0.518 | 0.32  |
| GHSR      | 1.971 | 0     |
| GIF       | 1.513 | 0     |

|         |       |       |
|---------|-------|-------|
| GIMAP1  | 2.496 | 5.63  |
| GIMAP2  | 2.886 | 10.45 |
| GIMAP3P | 1.778 | 0.14  |
| GIMAP4  | 3.93  | 32.99 |
| GIMAP5  | 3.918 | 14.88 |
| GIMAP6  | 8.127 | 19.09 |
| GIMAP7  | 2.458 | 7.47  |
| GIMAP8  | 7.886 | 3.11  |
| GINS1   | 1.831 | 2.16  |
| GINS2   | 1.172 | 11.14 |
| GINS3   | 2.149 | 16.5  |
| GINS4   | 1.166 | 1.66  |
| GIP     | 0.711 | 0     |
| GIPC1   | 2.115 | 40.82 |
| GIPC2   | 2.823 | 0.51  |
| GIPC3   | 3.835 | 24.38 |
| GIPR    | 2.024 | 0     |
| GIT1    | 3.726 | 30.43 |
| GIT2    | 6.415 | 13.39 |
| GIYD1   | 1.112 | 6.14  |
| GIYD2   | 1.112 | 6.14  |
| GJA1    | 3.086 | 0     |
| GJA10   | 2.313 | 0     |
| GJA12   | 2.243 | 0.42  |
| GJA1P1  | 3.072 | 0     |
| GJA3    | 1.308 | 0     |
| GJA4    | 1.622 | 0.26  |
| GJA5    | 2.653 | 1.3   |
| GJA7    | 1.889 | 0.26  |
| GJA8    | 1.374 | 0     |
| GJA9    | 0.966 | 0     |
| GJB1    | 1.613 | 0     |
| GJB2    | 2.25  | 0.45  |
| GJB3    | 3.141 | 0     |
| GJB4    | 1.151 | 0     |
| GJB5    | 1.281 | 0     |
| GJB6    | 1.767 | 0     |
| GJB7    | 2.279 | 0     |
| GJC1    | 2.441 | 4.76  |
| GJE1    | 1.68  | 0     |
| GK      | 3.574 | 0.31  |
| GK2     | 1.866 | 0     |
| GK3P    | 0.974 | 0.09  |
| GK4P    | 2.138 | 0.2   |
| GK5     | 9.816 | 0.24  |
| GK6P    | 1.803 | 0.05  |
| GKAP1   | 1.778 | 1.94  |
| GKN1    | 0.82  | 0     |
| GKN2    | 0.8   | 0.21  |
| GLA     | 1.35  | 10.61 |

|          |        |       |
|----------|--------|-------|
| GLB1     | 2.392  | 16.55 |
| GLB1L    | 2.505  | 1.38  |
| GLB1L3   | 2.706  | 8.65  |
| GLCCI1   | 6.014  | 0.97  |
| GLCE     | 5.043  | 0.76  |
| GLDC     | 3.764  | 4.81  |
| GLDCP    | 3.766  | 2.37  |
| GLDN     | 4.595  | 0     |
| GLE1L    | 3.604  | 29.68 |
| GLG1     | 5.401  | 22.31 |
| GLI1     | 3.6    | 0.09  |
| GLI2     | 6.549  | 0.2   |
| GLI3     | 10.108 | 0.65  |
| GLI4     | 1.343  | 12.23 |
| GLIPR1   | 1.061  | 11.04 |
| GLIPR1L1 | 0.962  | 0.08  |
| GLIPR1L2 | 1.729  | 0.05  |
| GLIS1    | 2.816  | 0     |
| GLIS2    | 1.909  | 0.26  |
| GLIS3    | 3.118  | 0     |
| GLMN     | 2.032  | 1.5   |
| GLO1     | 1.993  | 18.81 |
| GLOXD1   | 1.803  | 3.83  |
| GLP1R    | 3.063  | 0     |
| GLP2R    | 1.662  | 0     |
| GLRA1    | 1.709  | 0     |
| GLRA2    | 3.216  | 0     |
| GLRA3    | 2.538  | 0     |
| GLRB     | 2.609  | 0     |
| GLRX     | 1.329  | 33.41 |
| GLRX2    | 1.446  | 0.82  |
| GLRX5    | 1.171  | 32.66 |
| GLRXP    | 0.334  | 3.03  |
| GLRXP2   | 1.5    | 0     |
| GLS      | 5.093  | 12.7  |
| GLS2     | 2.623  | 0.42  |
| GLT1D1   | 2.721  | 0.22  |
| GLT25D1  | 3.593  | 44.24 |
| GLT25D2  | 5.182  | 0.18  |
| GLT6D1   | 1.526  | 0     |
| GLT8D1   | 2.427  | 16.62 |
| GLT8D2   | 1.877  | 0.31  |
| GLT8D3   | 7.493  | 0.88  |
| GLTP     | 2.356  | 14.3  |
| GLTSCR1  | 5.699  | 3.18  |
| GLTSCR2  | 1.499  | 510.7 |
| GLUD1    | 3.039  | 23.37 |
| GLUD2    | 2.335  | 12.01 |
| GLUDP2   | 0.398  | 0     |
| GLUDP3   | 6.136  | 0.66  |

|         |        |         |
|---------|--------|---------|
| GLUDP4  | 2.089  | 0       |
| GLUL    | 3.698  | 30.18   |
| GLULD1  | 1.934  | 0       |
| GLULL1  | 2.105  | 2.64    |
| GLULP   | 1.116  | 1.36    |
| GLYAT   | 2.729  | 0       |
| GLYATL1 | 2.068  | 0       |
| GLYATL2 | 1.636  | 0       |
| GLYCAM1 | 3.057  | 0       |
| GLYCTK  | 1.982  | 3.57    |
| GM2A    | 2.511  | 19.49   |
| GM2AP   | 0.563  | 0.59    |
| GM632   | 5.919  | 8.71    |
| GMCL1   | 2.346  | 1.97    |
| GMCL1L  | 2.925  | 0.34    |
| GMDS    | 1.672  | 9.42    |
| GMEB1   | 2.183  | 3.9     |
| GMEB2   | 4.763  | 5.46    |
| GMFB    | 4.125  | 1.65    |
| GMFG    | 0.551  | 340.61  |
| GMIP    | 3.517  | 14.18   |
| GML     | 0.723  | 0       |
| GMNN    | 1.633  | 8.92    |
| GMPPA   | 1.885  | 12.87   |
| GMPPB   | 1.957  | 6.59    |
| GMPR    | 1.515  | 1.22    |
| GMPR2   | 2.824  | 27.44   |
| GMPS    | 2.457  | 17.83   |
| GNA11   | 1.671  | 13.46   |
| GNA12   | 10.975 | 11.23   |
| GNA13   | 4.719  | 12.28   |
| GNA14   | 1.929  | 0       |
| GNA15   | 2.283  | 114.01  |
| GNAI1   | 6.64   | 5.01    |
| GNAI2   | 2.2    | 187.08  |
| GNAI3   | 3.138  | 14.6    |
| GNAL    | 3.555  | 0.03    |
| GNAO1   | 2.571  | 0       |
| GNAQ    | 2.776  | 13.01   |
| GNAQP   | 1.435  | 2.81    |
| GNAS    | 4.939  | 155.8   |
| GNAT1   | 2.534  | 0.03    |
| GNAT2   | 1.51   | 0.39    |
| GNAT3   | 2.131  | 0       |
| GNAZ    | 3.211  | 0.53    |
| GNB1    | 3.128  | 130.66  |
| GNB1L   | 1.515  | 5.45    |
| GNB2    | 3.304  | 53.92   |
| GNB2L1  | 1.109  | 2428.02 |
| GNB3    | 1.923  | 0.31    |

|           |        |       |
|-----------|--------|-------|
| GNB4      | 3.302  | 4.38  |
| GNB5      | 3.17   | 4.17  |
| GNE       | 3.745  | 1.89  |
| GNG10     | 1.245  | 4.19  |
| GNG11     | 1.908  | 0.26  |
| GNG12     | 4.289  | 1.39  |
| GNG13     | 0.95   | 0.36  |
| GNG2      | 3.419  | 24.76 |
| GNG3      | 1.193  | 4.87  |
| GNG4      | 1.721  | 0     |
| GNG5      | 0.701  | 44.82 |
| GNG5ps    | 0.427  | 21.7  |
| GNG7      | 4.155  | 33.92 |
| GNG8      | 0.213  | 0.4   |
| GNGT1     | 1.256  | 0     |
| GNGT2     | 1.039  | 3.41  |
| GNL1      | 9.021  | 0.07  |
| GNL2      | 2.308  | 17.95 |
| GNL3      | 2.523  | 23.67 |
| GNL3L     | 6.826  | 9.43  |
| GNLY      | 1.21   | 3.2   |
| GNMT      | 1.068  | 0.48  |
| GNPAT     | 2.439  | 10.81 |
| GNPDA1    | 2.267  | 10.59 |
| GNPDA2    | 1.918  | 2.51  |
| GNPNAT1   | 3.925  | 3.95  |
| GNPTAB    | 5.615  | 27.77 |
| GNPTG     | 1.556  | 28.2  |
| GNRH1     | 1.511  | 0.06  |
| GNRH2     | 0.694  | 0     |
| GNRHR     | 9.285  | 0.03  |
| GNRHR2    | 6.257  | 4.46  |
| GNS       | 5.114  | 8.69  |
| GOLGA     | 3.177  | 0     |
| GOLGA1    | 4.798  | 1.33  |
| GOLGA2    | 4.26   | 7.62  |
| GOLGA2L1  | 2.266  | 0.52  |
| GOLGA2LY1 | 1.061  | 0     |
| GOLGA2LY2 | 5.926  | 0     |
| GOLGA3    | 9.252  | 8.83  |
| GOLGA4    | 7.702  | 2.29  |
| GOLGA5    | 2.891  | 6.26  |
| GOLGA6    | 3.176  | 0     |
| GOLGA7    | 2.105  | 21.17 |
| GOLGA8A   | 5.229  | 2.79  |
| GOLGA8B   | 4.044  | 3.09  |
| GOLGA8E   | 5.24   | 0     |
| GOLGA8G   | 5.256  | 0     |
| GOLGB1    | 10.572 | 5.87  |
| GOLPH2    | 3.224  | 1.28  |

|         |       |       |
|---------|-------|-------|
| GOLPH3  | 2.676 | 21.66 |
| GOLPH3L | 3.127 | 7.38  |
| GOLPH4  | 3.513 | 1.2   |
| GOLT1A  | 0.883 | 0     |
| GOLT1B  | 2.924 | 1.18  |
| GON4L   | 9.563 | 5.9   |
| GOPC    | 4.604 | 7.9   |
| GORASP1 | 3.259 | 14.47 |
| GORASP2 | 2.499 | 42.57 |
| GOSR1   | 5.497 | 3.06  |
| GOSR2   | 6.049 | 6.85  |
| GOT1    | 1.942 | 11.8  |
| GOT1L1  | 1.377 | 0     |
| GOT2    | 2.447 | 38.21 |
| GP1BA   | 2.424 | 0.35  |
| GP1BB   | 0.958 | 0     |
| GP2     | 2.431 | 0     |
| GP5     | 5.223 | 0.45  |
| GP6     | 2.264 | 0.03  |
| GP9     | 0.854 | 1.88  |
| GPA33   | 2.793 | 0.27  |
| GPAA1   | 2.067 | 43.6  |
| GPAA1P1 | 1.02  | 2.73  |
| GPAM    | 6.368 | 1.25  |
| GPATCH1 | 3.362 | 2.46  |
| GPATCH2 | 2.336 | 2.27  |
| GPATCH3 | 2.123 | 6.59  |
| GPATCH4 | 2.1   | 21.26 |
| GPATCH8 | 6.86  | 13.8  |
| GPBAR1  | 1.367 | 0.13  |
| GPBP1   | 2.857 | 14.8  |
| GPBP1L1 | 3.384 | 20.96 |
| GPC1    | 3.686 | 0.2   |
| GPC2    | 5.064 | 1.15  |
| GPC3    | 2.312 | 0.11  |
| GPC4    | 3.714 | 0.25  |
| GPC5    | 2.889 | 0     |
| GPC6    | 2.759 | 0.34  |
| GPD1    | 2.877 | 0.26  |
| GPD1L   | 3.915 | 3.47  |
| GPD2    | 2.794 | 1.18  |
| GPHA2   | 0.747 | 0     |
| GPHB5   | 0.392 | 0     |
| GPHN    | 4.302 | 2.61  |
| GPI     | 2.075 | 77.5  |
| GPIAP1  | 6.925 | 32.33 |
| GPKOW   | 1.652 | 12.9  |
| GPLD1   | 4.138 | 0.37  |
| GPM6A   | 4.009 | 0.04  |
| GPM6B   | 4.093 | 2.92  |

|         |       |       |
|---------|-------|-------|
| GPNMB   | 5.73  | 0.25  |
| GPR1    | 2.075 | 0     |
| GPR101  | 1.527 | 0     |
| GPR103  | 1.296 | 0     |
| GPR107  | 6.878 | 5.87  |
| GPR108  | 2.405 | 15.09 |
| GPR109A | 2.065 | 0.2   |
| GPR109B | 2.042 | 0.04  |
| GPR110  | 4.343 | 15.44 |
| GPR111  | 2.521 | 0     |
| GPR112  | 9.931 | 0     |
| GPR113  | 3.24  | 0.65  |
| GPR114  | 3.761 | 0.94  |
| GPR115  | 2.574 | 0     |
| GPR116  | 5.502 | 0     |
| GPR119  | 1.008 | 0     |
| GPR12   | 1.005 | 0.5   |
| GPR120  | 1.19  | 0     |
| GPR123  | 3.84  | 0     |
| GPR124  | 5.649 | 10.66 |
| GPR125  | 4.56  | 5.45  |
| GPR126  | 9.845 | 0     |
| GPR128  | 3.07  | 0     |
| GPR132  | 3.636 | 8.34  |
| GPR133  | 2.824 | 0.15  |
| GPR135  | 2.542 | 0.1   |
| GPR137  | 1.688 | 13.22 |
| GPR137B | 1.997 | 0.38  |
| GPR137C | 4.79  | 0.03  |
| GPR139  | 1.238 | 0     |
| GPR141  | 1.836 | 0.09  |
| GPR142  | 1.389 | 0     |
| GPR143  | 1.607 | 0     |
| GPR143P | 6.108 | 0     |
| GPR144  | 2.892 | 0     |
| GPR146  | 3.514 | 3.71  |
| GPR148  | 1.187 | 0     |
| GPR149  | 2.323 | 0     |
| GPR15   | 1.083 | 0.08  |
| GPR150  | 1.305 | 0.52  |
| GPR151  | 1.26  | 0     |
| GPR152  | 1.429 | 0.06  |
| GPR153  | 2.632 | 0.32  |
| GPR155  | 7.473 | 0.25  |
| GPR156  | 2.445 | 0     |
| GPR157  | 1.153 | 0     |
| GPR158  | 6.663 | 0     |
| GPR160  | 1.745 | 0.63  |
| GPR161  | 2.958 | 0.29  |
| GPR162  | 2.812 | 0.72  |



|         |       |       |
|---------|-------|-------|
| GPR165P | 0.712 | 0     |
| GPR166P | 0.702 | 0     |
| GPR17   | 2.062 | 0.12  |
| GPR171  | 1.786 | 4.48  |
| GPR172A | 1.937 | 18.79 |
| GPR172B | 2.294 | 0.08  |
| GPR173  | 1.698 | 0.15  |
| GPR174  | 1.258 | 0.07  |
| GPR175  | 1.861 | 16.75 |
| GPR176  | 3.084 | 8.22  |
| GPR177  | 3.32  | 0.82  |
| GPR179  | 7.98  | 0.01  |
| GPR18   | 1.603 | 0.42  |
| GPR180  | 3.922 | 0.88  |
| GPR19   | 1.409 | 0     |
| GPR20   | 1.528 | 0     |
| GPR21   | 1.05  | 0     |
| GPR22   | 5.932 | 0     |
| GPR23   | 2.293 | 0     |
| GPR25   | 1.086 | 0.08  |
| GPR26   | 7.514 | 0     |
| GPR27   | 1.128 | 0     |
| GPR3    | 2.111 | 2.12  |
| GPR30   | 5.942 | 0.04  |
| GPR31   | 0.96  | 0     |
| GPR32   | 1.071 | 0     |
| GPR32P  | 1.611 | 0     |
| GPR33   | 1.055 | 0     |
| GPR34   | 4.442 | 0.02  |
| GPR35   | 1.875 | 1.08  |
| GPR37   | 5.916 | 0     |
| GPR37L1 | 2.459 | 0     |
| GPR39   | 1.362 | 0     |
| GPR4    | 2.693 | 0.06  |
| GPR42   | 1.041 | 0     |
| GPR44   | 2.901 | 0.32  |
| GPR45   | 1.725 | 0     |
| GPR50   | 1.951 | 0     |
| GPR52   | 1.472 | 0     |
| GPR53P  | 3.774 | 0     |
| GPR55   | 2.527 | 0.07  |
| GPR56   | 5.98  | 31.03 |
| GPR6    | 1.626 | 0     |
| GPR61   | 2.462 | 0     |
| GPR62   | 2.124 | 0     |
| GPR63   | 1.891 | 0.44  |
| GPR64   | 4.641 | 0     |
| GPR65   | 1.754 | 0.53  |
| GPR68   | 2.814 | 4.07  |
| GPR75   | 2.057 | 0.49  |

|         |        |        |
|---------|--------|--------|
| GPR77   | 1.287  | 0.2    |
| GPR78   | 1.941  | 0      |
| GPR79   | 1.018  | 0      |
| GPR81   | 2.977  | 0.4    |
| GPR82   | 1.41   | 0      |
| GPR83   | 4.109  | 0      |
| GPR84   | 1.497  | 0.39   |
| GPR85   | 9.764  | 0      |
| GPR87   | 1.498  | 0      |
| GPR88   | 3.488  | 0      |
| GPR89A  | 1.928  | 0.7    |
| GPR92   | 2.845  | 9.68   |
| GPR97   | 2.656  | 0.44   |
| GPR98   | 19.333 | 0      |
| GPRASP1 | 4.705  | 0.41   |
| GPRASP2 | 3.572  | 1.54   |
| GPRC5A  | 2.851  | 0.03   |
| GPRC5B  | 2.845  | 0.06   |
| GPRC5C  | 2.434  | 5.85   |
| GPRC5D  | 1.038  | 0      |
| GPRC6A  | 2.86   | 0      |
| GPRIN1  | 4.208  | 3.76   |
| GPRIN2  | 1.823  | 0      |
| GPRIN3  | 6.489  | 13.09  |
| GPS1    | 2.738  | 31.32  |
| GPS2    | 1.157  | 45.36  |
| GPSM1   | 1.959  | 1.08   |
| GPSM2   | 2.788  | 3.3    |
| GPSM3   | 4.368  | 0.81   |
| GPSN2   | 1.163  | 89.67  |
| GPT     | 1.922  | 0.26   |
| GPT2    | 3.955  | 0.04   |
| GPX1    | 2.007  | 242.3  |
| GPX2    | 0.994  | 0.34   |
| GPX3    | 1.761  | 1.91   |
| GPX4    | 1.528  | 172.94 |
| GPX5    | 0.768  | 0      |
| GPX6    | 1.712  | 0      |
| GPX7    | 1.227  | 33.43  |
| GPXP2   | 0.94   | 0.8    |
| GRAMD1A | 2.64   | 135.74 |
| GRAMD1C | 3.765  | 0.7    |
| GRAMD2  | 3.281  | 0.03   |
| GRAMD3  | 2.905  | 0.08   |
| GRAP    | 2.033  | 37.95  |
| GRAP2   | 1.552  | 0.22   |
| GRASP   | 1.932  | 0.53   |
| GRB10   | 10.986 | 7.26   |
| GRB14   | 2.387  | 0      |
| GRB2    | 3.468  | 47.51  |

|         |        |        |
|---------|--------|--------|
| GRB7    | 2.293  | 1.84   |
| GREB1   | 10.498 | 0      |
| GREM1   | 4.134  | 1.1    |
| GREM2   | 4.183  | 0.02   |
| GRHL1   | 3.84   | 0      |
| GRHL2   | 4.778  | 0      |
| GRHL3   | 3.302  | 0      |
| GRHPR   | 1.235  | 19.58  |
| GRIA1   | 3.24   | 0      |
| GRIA2   | 5.644  | 0      |
| GRIA3   | 3.692  | 0      |
| GRIA4   | 2.709  | 0      |
| GRID1   | 5.849  | 0      |
| GRID2   | 3.024  | 0      |
| GRID2IP | 58.097 | 0.55   |
| GRIK1   | 3.684  | 0.09   |
| GRIK2   | 3.969  | 0      |
| GRIK3   | 3.733  | 0      |
| GRIK4   | 2.871  | 0      |
| GRIK5   | 3.528  | 14.8   |
| GRIN1   | 7.351  | 0      |
| GRIN2A  | 6.289  | 0      |
| GRIN2B  | 6.237  | 0      |
| GRIN2C  | 4.268  | 2.52   |
| GRIN2D  | 4.298  | 0      |
| GRIN3A  | 7.77   | 0.08   |
| GRIN3B  | 3.254  | 0.25   |
| GRINA   | 2.11   | 49.66  |
| GRINL1A | 5.207  | 3.17   |
| GRIP1   | 4.617  | 0.02   |
| GRIP2   | 3.426  | 0      |
| GRIPAP1 | 4.738  | 11.07  |
| GRK1    | 1.096  | 0      |
| GRK4    | 2.314  | 0.51   |
| GRK5    | 2.558  | 14.56  |
| GRK6    | 4.115  | 21.49  |
| GRK6PS  | 2.417  | 2.65   |
| GRK7    | 1.746  | 0      |
| GRLF1   | 8.455  | 7.74   |
| GRM1    | 6.622  | 0      |
| GRM2    | 3.156  | 0.37   |
| GRM3    | 8.52   | 0      |
| GRM4    | 3.879  | 0      |
| GRM5    | 4.475  | 0      |
| GRM6    | 6.139  | 0      |
| GRM7    | 5.625  | 0      |
| GRM8    | 6.59   | 0      |
| GRN     | 2.551  | 104.51 |
| GRP     | 1.484  | 0      |
| GRPEL1  | 1.504  | 13.33  |

|         |       |        |
|---------|-------|--------|
| GRPEL2  | 4.105 | 1.54   |
| GRPR    | 2.681 | 0      |
| GRRP1   | 1.523 | 0.11   |
| GRSF1   | 2.839 | 16.89  |
| G RTP1  | 1.492 | 0.45   |
| GRWD1   | 2.414 | 20.13  |
| GSC     | 1.189 | 0      |
| GSCL    | 0.618 | 0      |
| GSDM1   | 2.164 | 0      |
| GSDMDC1 | 2.372 | 66.44  |
| GSDML   | 1.626 | 4.45   |
| GSG1    | 3.134 | 0.13   |
| GSG1L   | 1.172 | 0      |
| GSG2    | 2.797 | 2.11   |
| GSH1    | 0.847 | 0      |
| GSH2    | 1.262 | 0      |
| GSK3A   | 2.179 | 49.52  |
| GSK3B   | 2.212 | 7.43   |
| GSN     | 3.065 | 299.54 |
| GSPT1   | 3.229 | 24.96  |
| GSPT2   | 2.503 | 4.68   |
| GSR     | 2.262 | 17.31  |
| GSS     | 1.9   | 26.73  |
| GSTA1   | 1.042 | 0      |
| GSTA2   | 0.976 | 0      |
| GSTA3   | 0.908 | 0      |
| GSTA4   | 1.298 | 2.73   |
| GSTA5   | 0.845 | 0      |
| GSTAP1  | 0.75  | 0      |
| GSTCD   | 3.118 | 1.4    |
| GSTK1   | 2     | 40.73  |
| GSTM1   | 1.161 | 23     |
| GSTM2   | 1.154 | 18.61  |
| GSTM3   | 3.948 | 0.98   |
| GSTM3P  | 0.574 | 0      |
| GSTM4   | 1.905 | 3.31   |
| GSTM5   | 1.567 | 0      |
| GSTO1   | 0.785 | 53.87  |
| GSTO2   | 1.494 | 0.11   |
| GSTO3P1 | 0.79  | 9.7    |
| GSTP1   | 0.737 | 419.69 |
| GSTPP   | 0.412 | 0.2    |
| GSTT1   | 1.005 | 7.46   |
| GSTT2   | 1.101 | 0.15   |
| GSTZ1   | 1.679 | 4.01   |
| GTDC1   | 3.828 | 1.76   |
| GTF2A1  | 1.922 | 3.72   |
| GTF2A2  | 0.735 | 31.17  |
| GTF2B   | 1.304 | 17.76  |
| GTF2E1  | 2.955 | 2.85   |

|           |         |       |
|-----------|---------|-------|
| GTF2E2    | 1.53    | 13.38 |
| GTF2F1    | 2.443   | 42.75 |
| GTF2F2    | 1.41    | 9.5   |
| GTF2F2L   | 1.122   | 1.58  |
| GTF2H1    | 2.968   | 8.51  |
| GTF2H2    | 3.872   | 0.02  |
| GTF2H3    | 1.505   | 6.27  |
| GTF2H4    | 5.148   | 0     |
| GTF2H5    | 0.449   | 24.57 |
| GTF2I     | 9.058   | 2.75  |
| GTF2IP1   | 111.876 | 0.06  |
| GTF2IRD1  | 7.114   | 0.83  |
| GTF2IRD2  | 7.102   | 0.85  |
| GTF2IRD2B | 7.17    | 1.09  |
| GTF2IRD2P | 63.534  | 0.03  |
| GTF3C1    | 6.995   | 12.42 |
| GTF3C2    | 3.92    | 13.43 |
| GTF3C3    | 2.938   | 13.04 |
| GTF3C4    | 3.209   | 3.49  |
| GTF3C5    | 2.639   | 52.38 |
| GTPBP1    | 5.047   | 17.98 |
| GTPBP10   | 4.272   | 1.1   |
| GTPBP2    | 3.259   | 11.81 |
| GTPBP3    | 3.228   | 5.12  |
| GTPBP4    | 2.517   | 12.59 |
| GTPBP5    | 3.561   | 6.22  |
| GTPBP6    | 1.18    | 23.56 |
| GTPBP8    | 1.982   | 1.4   |
| GTPBP9    | 4.532   | 10.07 |
| GTSCR1    | 0.402   | 0     |
| GTSE1     | 4.478   | 6.49  |
| GUCA1A    | 1.874   | 0     |
| GUCA1B    | 2.27    | 0.14  |
| GUCA1C    | 0.86    | 0     |
| GUCA2A    | 0.575   | 0     |
| GUCA2B    | 0.597   | 0     |
| GUCY1A2   | 2.954   | 0     |
| GUCY1A3   | 2.992   | 4.5   |
| GUCY1B2   | 2.871   | 0     |
| GUCY1B3   | 2.443   | 2.06  |
| GUCY2C    | 3.744   | 0.03  |
| GUCY2D    | 3.622   | 0     |
| GUCY2E    | 2.779   | 0     |
| GUCY2F    | 3.698   | 0     |
| GUF1      | 2.671   | 2.74  |
| GUK1      | 1.656   | 62.52 |
| GULOP     | 0.107   | 0     |
| GULP1     | 3.451   | 0     |
| GUSB      | 4.382   | 17.67 |
| GUSBL1    | 0.979   | 0.08  |

|         |        |        |
|---------|--------|--------|
| GUSBL2  | 2.624  | 3.24   |
| GUSBP1  | 7.169  | 0      |
| GVIN1   | 8.82   | 1.57   |
| GYG1    | 1.805  | 13.3   |
| GYG2    | 3.267  | 0      |
| GYG2P   | 14.911 | 0      |
| GYLTL1B | 2.528  | 5.33   |
| GYPA    | 2.6    | 0.78   |
| GYPB    | 0.527  | 3.68   |
| GYPC    | 1.071  | 395.07 |
| GYPE    | 1.886  | 0.62   |
| GYS1    | 3.557  | 20.32  |
| GYS2    | 2.905  | 0      |
| GZF1    | 4.741  | 1.96   |
| GZMA    | 0.878  | 37.99  |
| GZMB    | 0.927  | 3.45   |
| GZMH    | 0.902  | 3.36   |
| GZMK    | 1.045  | 1.29   |
| GZMM    | 0.947  | 0.89   |
| H19     | 2.308  | 1.86   |
| H1F0    | 2.33   | 186.19 |
| H1FNT   | 1.3    | 0      |
| H1FOO   | 1.067  | 0      |
| H1FX    | 1.503  | 272.54 |
| H2AFB1  | 0.517  | 0      |
| H2AFB2  | 0.348  | 0      |
| H2AFB3  | 0.517  | 0      |
| H2AFJ   | 2.807  | 10.5   |
| H2AFV   | 4.406  | 14.88  |
| H2AFX   | 1.594  | 53.96  |
| H2AFY   | 2.262  | 260.08 |
| H2AFY2  | 1.917  | 0      |
| H2AFZ   | 0.947  | 52.93  |
| H2AFZP  | 1.167  | 2.23   |
| H2AFZP2 | 0.851  | 4.55   |
| H2BFM   | 1.964  | 0      |
| H2BFS   | 0.381  | 1.11   |
| H2BFWT  | 0.89   | 0      |
| H3F3A   | 1.049  | 1.21   |
| H3F3B   | 2.705  | 193.66 |
| H6PD    | 9.117  | 6.6    |
| HAAO    | 1.247  | 13.17  |
| HABP2   | 3.009  | 0      |
| HABP4   | 1.784  | 2.83   |
| HACE1   | 4.54   | 2.01   |
| HACL1   | 2.03   | 9.13   |
| HADH    | 1.912  | 28.06  |
| HADHA   | 2.927  | 76.92  |
| HADHAP  | 2.854  | 5.6    |
| HADHB   | 1.983  | 30.84  |

|             |       |         |
|-------------|-------|---------|
| HAGH        | 2.266 | 9.36    |
| HAGHL       | 2.555 | 1.65    |
| HAL         | 3.139 | 0.05    |
| HAMP        | 0.427 | 0.2     |
| HAND1       | 1.738 | 0       |
| HAND2       | 2.368 | 0       |
| HAO1        | 1.746 | 0       |
| HAO2        | 1.696 | 0       |
| HAP1        | 4.087 | 0.2     |
| HAPLN1      | 1.76  | 0       |
| HAPLN2      | 1.771 | 0       |
| HAPLN3      | 1.893 | 0.49    |
| HAPLN4      | 3.383 | 0       |
| HARS        | 1.964 | 33.5    |
| HARS2       | 2.49  | 10.49   |
| HAS1        | 2.087 | 0       |
| HAS2        | 3.008 | 0       |
| HAS3        | 4.645 | 0.83    |
| HASNT       | 1.656 | 0       |
| HAT1        | 1.828 | 12.99   |
| HAVCR1      | 1.453 | 0.06    |
| HAVCR2      | 2.32  | 0.32    |
| HAX1        | 1.294 | 46.29   |
| HBA1        | 0.576 | 1631.93 |
| HBA2        | 0.575 | 1348.95 |
| HBAP1       | 0.812 | 0       |
| HBB         | 0.626 | 1566.03 |
| HBBP1       | 2.402 | 0.21    |
| HBD         | 0.774 | 41.25   |
| HBE1        | 0.816 | 0.42    |
| HBEGF       | 2.344 | 10.21   |
| HBG1        | 0.584 | 75.58   |
| HBG2        | 0.583 | 156.04  |
| HBM         | 0.51  | 30.39   |
| HBP1        | 5.658 | 4.81    |
| HBQ1        | 0.651 | 1.04    |
| HBS1L       | 7.149 | 6.94    |
| HBXIP       | 0.85  | 52.23   |
| HBZ         | 0.589 | 0       |
| HBZP        | 2.035 | 0       |
| HCCA2       | 1.406 | 14.26   |
| HCCS        | 2.307 | 4.23    |
| HCFC1       | 7.711 | 22.88   |
| HCFC1R1     | 1.133 | 24.31   |
| HCFC2       | 2.583 | 2.12    |
| hCG_15200   | 2.309 | 77.78   |
| hCG_16001   | 0.585 | 0.87    |
| hCG_1640171 | 0.669 | 8.82    |
| hCG_1640785 | 0.5   | 1217.72 |
| hCG_1641229 | 1.748 | 66.21   |

|             |       |       |
|-------------|-------|-------|
| hCG_1641617 | 0.305 | 2.49  |
| hCG_1641703 | 0.699 | 1.09  |
| hCG_1642034 | 0.318 | 0     |
| hCG_1642354 | 0.468 | 1.8   |
| hCG_1642425 | 0.348 | 0     |
| hCG_1642535 | 0.216 | 0     |
| hCG_1642624 | 1.023 | 0.83  |
| hCG_1642947 | 0.387 | 1.09  |
| hCG_1642987 | 0.267 | 0     |
| hCG_1643176 | 0.402 | 0     |
| hCG_1643692 | 0.771 | 0     |
| hCG_1644239 | 0.303 | 0.28  |
| hCG_1644301 | 0.459 | 47.34 |
| hCG_1644323 | 0.471 | 1.25  |
| hCG_1644355 | 0.24  | 0     |
| hCG_1644608 | 1.48  | 0.28  |
| hCG_1644884 | 2.601 | 0     |
| hCG_1645016 | 1.567 | 0     |
| hCG_1645220 | 1.172 | 0.21  |
| hCG_1645727 | 1.377 | 0     |
| hCG_1646157 | 3.482 | 0.29  |
| hCG_1646420 | 0.69  | 0     |
| hCG_1646471 | 0.549 | 0     |
| hCG_1651160 | 0.585 | 0     |
| hCG_1654703 | 0.652 | 0.52  |
| hCG_1655019 | 0.381 | 0     |
| hCG_1657112 | 0.665 | 0     |
| hCG_1657980 | 1.213 | 0     |
| hCG_1659830 | 0.297 | 0     |
| hCG_1660138 | 0.849 | 0     |
| hCG_1660379 | 0.456 | 0     |
| hCG_1729902 | 0.698 | 0.6   |
| hCG_1730474 | 2.139 | 0     |
| hCG_1731871 | 0.3   | 0     |
| hCG_1732469 | 1.279 | 0     |
| hCG_1740678 | 1.107 | 0     |
| hCG_1749005 | 0.429 | 0     |
| hCG_1757335 | 1.283 | 24.75 |
| hCG_1773937 | 4.053 | 54.66 |
| hCG_17750   | 0.384 | 32.25 |
| hCG_1776018 | 1.053 | 0     |
| hCG_1776047 | 0.523 | 0     |
| hCG_1776980 | 1.212 | 13.27 |
| hCG_1778014 | 2.645 | 0.13  |
| hCG_1778643 | 0.573 | 0.59  |
| hCG_1781062 | 1.499 | 22.42 |
| hCG_1783052 | 4.715 | 2.34  |
| hCG_1783417 | 0.554 | 500.4 |
| hCG_1783907 | 0.657 | 0     |
| hCG_1786283 | 1.69  | 0     |



|             |       |         |
|-------------|-------|---------|
| hCG_1787519 | 0.745 | 0.57    |
| hCG_1789710 | 0.566 | 6.7     |
| hCG_1789827 | 0.371 | 0       |
| hCG_1790262 | 0.381 | 5.31    |
| hCG_1790474 | 0.339 | 1.24    |
| hCG_1790806 | 0.384 | 0.44    |
| hCG_1790950 | 0.354 | 0       |
| hCG_1791193 | 0.207 | 168.88  |
| hCG_1793136 | 0.375 | 0       |
| hCG_1793610 | 0.354 | 0.24    |
| hCG_1793639 | 0.273 | 0       |
| hCG_1794003 | 0.465 | 0       |
| hCG_1794298 | 0.966 | 0.08    |
| hCG_1795065 | 0.717 | 5.4     |
| hCG_1795091 | 0.49  | 0       |
| hCG_1795283 | 0.576 | 0       |
| hCG_17955   | 1.216 | 1.24    |
| hCG_1795560 | 0.165 | 2.04    |
| hCG_1806964 | 3.518 | 0.26    |
| hCG_1811337 | 0.291 | 0       |
| hCG_1813624 | 0.455 | 0       |
| hCG_1813818 | 0.627 | 0       |
| hCG_1814486 | 1.148 | 3.23    |
| hCG_1814936 | 0.607 | 0       |
| hCG_1815491 | 0.558 | 2.12    |
| hCG_1815504 | 0.635 | 0       |
| hCG_1817208 | 0.512 | 0       |
| hCG_1818231 | 0.472 | 0.18    |
| hCG_1818237 | 0.303 | 3.05    |
| hCG_1820717 | 0.467 | 0       |
| hCG_1820764 | 0.336 | 1.26    |
| hCG_1820801 | 0.559 | 0       |
| hCG_18255   | 0.588 | 0       |
| hCG_18290   | 0.495 | 1162.28 |
| hCG_18385   | 0.387 | 0.22    |
| hCG_18635   | 0.657 | 0       |
| hCG_1979841 | 0.93  | 0       |
| hCG_1980447 | 0.756 | 0       |
| hCG_1981531 | 1.27  | 1.46    |
| hCG_1981635 | 0.417 | 0       |
| hCG_1982709 | 1.429 | 2.65    |
| hCG_1983058 | 0.779 | 126.19  |
| hCG_1983332 | 0.856 | 31.98   |
| hCG_1983896 | 1.974 | 0.04    |
| hCG_1984265 | 0.47  | 0       |
| hCG_1984468 | 1.044 | 2.1     |
| hCG_1985469 | 1.832 | 1.15    |
| hCG_1986447 | 2.625 | 0.93    |
| hCG_1988300 | 3.013 | 0       |
| hCG_1989844 | 0.466 | 0.18    |

|             |       |        |
|-------------|-------|--------|
| hCG_1990491 | 1.182 | 0      |
| hCG_1992287 | 0.348 | 0      |
| hCG_1992539 | 1.565 | 2.42   |
| hCG_1994895 | 0.55  | 0      |
| hCG_1995786 | 0.671 | 13.31  |
| hCG_1999814 | 0.807 | 0      |
| hCG_2000329 | 1.027 | 129.84 |
| hCG_2001000 | 1.102 | 1.38   |
| hCG_2003663 | 2.215 | 0      |
| hCG_2003956 | 1.596 | 1.22   |
| hCG_2004593 | 0.664 | 0.38   |
| hCG_20114   | 1.404 | 2.1    |
| hCG_2013212 | 0.492 | 0.17   |
| hCG_2015956 | 0.89  | 7.48   |
| hCG_2019139 | 0.45  | 0      |
| hCG_2020170 | 0.171 | 0      |
| hCG_2023776 | 2.722 | 1.02   |
| hCG_2024094 | 1.275 | 7.73   |
| hCG_2024410 | 2.398 | 1.41   |
| hCG_2024596 | 0.738 | 0.68   |
| hCG_2025063 | 0.555 | 2.28   |
| hCG_2025128 | 3.541 | 0      |
| hCG_2025798 | 0.593 | 0      |
| hCG_2026038 | 0.902 | 1.21   |
| hCG_2028557 | 1.93  | 10.44  |
| hCG_2029702 | 0.596 | 0      |
| hCG_2031213 | 0.531 | 0      |
| hCG_2031635 | 0.303 | 7.23   |
| hCG_2032978 | 0.677 | 0      |
| hCG_2033311 | 0.477 | 0      |
| hCG_2036596 | 1.363 | 0      |
| hCG_2040054 | 0.977 | 0.08   |
| hCG_2040201 | 1.123 | 0      |
| hCG_2040210 | 1.082 | 0.62   |
| hCG_2040224 | 0.531 | 9.36   |
| hCG_2040376 | 2.241 | 4.25   |
| hCG_2040572 | 0.519 | 0      |
| hCG_2041321 | 0.363 | 0.93   |
| hCG_20417   | 2.618 | 0      |
| hCG_2042202 | 1.55  | 0      |
| hCG_20426   | 1.88  | 0.36   |
| hCG_2042779 | 0.609 | 0      |
| hCG_2044152 | 0.509 | 0      |
| hCG_2044975 | 0.459 | 0      |
| hCG_2045048 | 0.56  | 0      |
| hCG_2045437 | 0.635 | 0      |
| hCG_2045614 | 0.766 | 0      |
| hCG_2045751 | 0.635 | 0      |
| hCG_2045804 | 0.454 | 0      |
| hCG_2045828 | 0.455 | 0      |

|             |        |         |
|-------------|--------|---------|
| hCG_2045830 | 0.705  | 0.48    |
| hCG_2045843 | 0.537  | 0       |
| hCG_21078   | 0.567  | 2414.92 |
| hCG_22804   | 1.379  | 0.37    |
| hCG_23177   | 0.565  | 0       |
| hCG_24006   | 1.983  | 0       |
| hCG_25371   | 0.54   | 68.33   |
| hCG_25653   | 0.653  | 0       |
| hCG_26523   | 0.523  | 37.21   |
| hCG_26824   | 0.965  | 4.27    |
| hCG_27695   | 0.693  | 5.47    |
| hCG_31916   | 0.8    | 24.85   |
| hCG_32481   | 3.633  | 9.44    |
| hCG_33730   | 74.989 | 0       |
| hCG_38480   | 0.825  | 0       |
| hCG_38941   | 1.892  | 0       |
| hCG_38984   | 1.581  | 0       |
| hCG_39912   | 0.636  | 0       |
| hCG_401283  | 1.083  | 0       |
| hCG_41095   | 1.307  | 0.26    |
| HCG12       | 1.3    | 3.11    |
| HCG22       | 0.576  | 0       |
| HCG27       | 5.156  | 0.03    |
| HCG2P6      | 7.093  | 0       |
| HCG2P7      | 3.633  | 0       |
| HCG2P8      | 7.077  | 0       |
| HCG4        | 2.035  | 0.33    |
| HCG4P10     | 2.664  | 0       |
| HCG4P3      | 0.984  | 0       |
| HCG4P4      | 0.429  | 0       |
| HCG4P5      | 0.89   | 0       |
| HCG4P6      | 3.184  | 0.1     |
| HCG4P7      | 0.898  | 0       |
| HCG4P8      | 0.986  | 0       |
| HCG9        | 1.959  | 0       |
| HCG9P5      | 0.794  | 0       |
| HCGVIII-2   | 1.28   | 0       |
| HCK         | 2.089  | 4.96    |
| HCLS1       | 1.957  | 112.82  |
| HCN1        | 2.748  | 0       |
| HCN2        | 3.408  | 0.03    |
| HCN3        | 3.717  | 0.52    |
| HCN4        | 5.065  | 0       |
| HCP5        | 4.866  | 37.71   |
| HCP5P10     | 2.657  | 0       |
| HCP5P12     | 4.68   | 0       |
| HCP5P13     | 1.113  | 0       |
| HCP5P14     | 7.018  | 0.03    |
| HCP5P15     | 2.323  | 0       |
| HCP5P2      | 2.268  | 0.22    |

|         |         |        |
|---------|---------|--------|
| HCP5P3  | 1.3     | 0.26   |
| HCP5P6  | 2.363   | 0      |
| HCP9    | 11.971  | 0      |
| HCRT    | 0.577   | 0      |
| HCRT1   | 1.564   | 0      |
| HCRT2   | 1.818   | 0      |
| HCST    | 0.545   | 34     |
| HCTSL-s | 0.657   | 0      |
| HD      | 13.475  | 5.07   |
| HDAC1   | 2.091   | 80.09  |
| HDAC10  | 2.687   | 18.93  |
| HDAC11  | 1.719   | 2.6    |
| HDAC2   | 1.964   | 34.22  |
| HDAC3   | 1.934   | 23     |
| HDAC4   | 8.458   | 0.67   |
| HDAC5   | 5.399   | 24.78  |
| HDAC6   | 4.099   | 12.25  |
| HDAC7A  | 4.457   | 48.12  |
| HDAC8   | 1.714   | 5.8    |
| HDAC9   | 15.461  | 0.8    |
| HDC     | 2.408   | 0.03   |
| HDDC2   | 1.465   | 23.34  |
| HDDC3   | 1.047   | 21.4   |
| HDGF    | 2.377   | 139.17 |
| HDGF2   | 2.422   | 30.46  |
| HDGFL1  | 2.034   | 0.13   |
| HDGFP   | 1.598   | 2.32   |
| HDGFRP3 | 1.973   | 0.55   |
| HDHD1A  | 2.098   | 3.41   |
| HDHD1BP | 107.418 | 0      |
| HDHD1CP | 1.847   | 0.05   |
| HDHD2   | 2.185   | 18.47  |
| HDHD3   | 1.721   | 11.6   |
| HDLBP   | 5.474   | 46.69  |
| HEATR1  | 7.329   | 5.65   |
| HEATR2  | 6.494   | 5.96   |
| HEATR3  | 2.625   | 3.65   |
| HEATR4  | 3.469   | 0.17   |
| HEATR5B | 6.792   | 3.46   |
| HEBP1   | 1.187   | 18.38  |
| HEBP2   | 1.282   | 11.17  |
| HECA    | 5.621   | 5.49   |
| HECTD1  | 8.955   | 7.35   |
| HECTD2  | 6.469   | 0.37   |
| HECTD3  | 3.407   | 16.25  |
| HECW1   | 13.678  | 0.28   |
| HECW2   | 6.926   | 0.01   |
| HEG1    | 9.213   | 0.24   |
| HEJ1    | 0.945   | 0      |
| HEL308  | 3.559   | 2.56   |

|          |        |       |
|----------|--------|-------|
| HELB     | 3.368  | 0.63  |
| HELLS    | 3.099  | 0.93  |
| HELT     | 0.984  | 0     |
| HELZ     | 6.311  | 4.54  |
| HEMGN    | 2.296  | 3.45  |
| HEMK1    | 5.862  | 5.76  |
| HEPACAM  | 3.24   | 0     |
| HEPH     | 4.65   | 0     |
| HEPHL1   | 6.181  | 0     |
| HEPN1    | 1.428  | 0     |
| HERC1    | 15.137 | 4.97  |
| HERC2    | 15.334 | 5.88  |
| HERC2P2  | 102.02 | 0.79  |
| HERC2P4  | 2.428  | 0     |
| HERC2P5  | 34.025 | 0     |
| HERC2P6  | 0.586  | 0     |
| HERC3    | 4.894  | 3.77  |
| HERC4    | 5.878  | 4.41  |
| HERC5    | 3.479  | 2.93  |
| HERC6    | 4.954  | 3.18  |
| HERPUD1  | 2.248  | 6.44  |
| HERPUD2  | 5.736  | 5.73  |
| HERV-FRD | 3.192  | 0.4   |
| HES1     | 1.453  | 1.05  |
| HES2     | 4.258  | 0     |
| HES3     | 1.355  | 0     |
| HES4     | 0.878  | 0.38  |
| HES5     | 1.306  | 0     |
| HES6     | 1.359  | 0.62  |
| HES7     | 0.678  | 0.25  |
| HESX1    | 0.892  | 0.76  |
| HEXA     | 2.255  | 27.72 |
| HEXB     | 1.859  | 26.15 |
| HEXDC    | 2.236  | 17.06 |
| HEXIM1   | 4.785  | 7.72  |
| HEXIM2   | 1.33   | 6.27  |
| HEY1     | 2.199  | 0.08  |
| HEY2     | 2.533  | 2.52  |
| HEYL     | 3.361  | 0.5   |
| HFE      | 3.685  | 0.57  |
| HFE2     | 3.349  | 0     |
| HFM1     | 2.02   | 0     |
| HGD      | 2.837  | 0     |
| HGF      | 9.104  | 0.08  |
| HGFAC    | 2.038  | 0.13  |
| HGS      | 3.229  | 25.02 |
| HGSNAT   | 5.952  | 0.2   |
| HHAT     | 3.594  | 2.86  |
| HHATL    | 1.75   | 0     |
| HHCM     | 1.407  | 0     |

|            |        |        |
|------------|--------|--------|
| HHEX       | 1.74   | 25.51  |
| HHIP       | 3.53   | 0.14   |
| HHLA1      | 2.277  | 0      |
| HHLA2      | 2.66   | 1.68   |
| HHLA3      | 1.863  | 5.02   |
| HIAT1      | 2.641  | 8.61   |
| HIATL1     | 3.298  | 10.85  |
| HIATL2     | 68.322 | 0.07   |
| HIBADH     | 3.956  | 5.36   |
| HIBCH      | 2.326  | 4.31   |
| HIC1       | 2.626  | 1.38   |
| HIC2       | 6.794  | 2.33   |
| HIF1A      | 5.263  | 12.92  |
| HIF1AN     | 3.919  | 11.76  |
| HIF3A      | 6.223  | 0.02   |
| HIG2       | 2.698  | 1.03   |
| HIGD1A     | 1.338  | 12.21  |
| HIGD1B     | 0.626  | 0.27   |
| HIGD2A     | 0.611  | 132.9  |
| HIGD2BP    | 11.485 | 0      |
| HILS1      | 0.854  | 0.2    |
| HIN1L      | 6.813  | 0.75   |
| HINT1      | 0.675  | 188.57 |
| HINT2      | 0.652  | 12.79  |
| HINT3      | 1.487  | 1.81   |
| HIP1       | 14.75  | 2.24   |
| HIP1R      | 4.473  | 2.02   |
| HIP2       | 2.381  | 13.9   |
| HIPK1      | 8.805  | 6.34   |
| HIPK2      | 5.596  | 0.63   |
| HIPK3      | 4.446  | 10.1   |
| HIPK4      | 2.452  | 0.14   |
| HIRA       | 4.013  | 11     |
| HIRIP3     | 2.344  | 17.32  |
| HISPPD1    | 5.281  | 8.47   |
| HISPPD2A   | 7.708  | 4.05   |
| HIST1H1A   | 0.757  | 0      |
| HIST1H1B   | 0.79   | 1.06   |
| HIST1H1C   | 0.732  | 174.22 |
| HIST1H1D   | 0.777  | 3.58   |
| HIST1H1E   | 0.785  | 2.46   |
| HIST1H1PS2 | 0.735  | 0      |
| HIST1H1T   | 0.725  | 0      |
| HIST1H2AA  | 0.5    | 0      |
| HIST1H2AB  | 0.477  | 0.71   |
| HIST1H2AC  | 0.546  | 104.76 |
| HIST1H2AD  | 0.46   | 2.75   |
| HIST1H2AE  | 0.564  | 23     |
| HIST1H2AG  | 2.251  | 2.7    |
| HIST1H2AH  | 0.439  | 0.76   |

|             |       |        |
|-------------|-------|--------|
| HIST1H2AI   | 0.469 | 8.09   |
| HIST1H2AJ   | 0.439 | 0.38   |
| HIST1H2AK   | 0.46  | 1.47   |
| HIST1H2AL   | 0.47  | 1.97   |
| HIST1H2AM   | 0.487 | 3.29   |
| HIST1H2APS2 | 0.291 | 0      |
| HIST1H2APS4 | 0.348 | 0      |
| HIST1H2APS5 | 0.651 | 0.13   |
| HIST1H2BA   | 0.437 | 0      |
| HIST1H2BB   | 0.431 | 0.59   |
| HIST1H2BC   | 0.438 | 6.34   |
| HIST1H2BD   | 0.907 | 57.11  |
| HIST1H2BE   | 0.435 | 0.2    |
| HIST1H2BF   | 0.43  | 6.08   |
| HIST1H2BG   | 0.445 | 17.23  |
| HIST1H2BH   | 0.425 | 5.75   |
| HIST1H2BI   | 0.437 | 0.38   |
| HIST1H2BJ   | 0.481 | 9.98   |
| HIST1H2BK   | 0.82  | 259.49 |
| HIST1H2BL   | 0.938 | 7.36   |
| HIST1H2BM   | 0.446 | 1.51   |
| HIST1H2BN   | 0.449 | 2.25   |
| HIST1H2BO   | 0.467 | 7.04   |
| HIST1H2BPS2 | 0.34  | 0.25   |
| HIST1H3A    | 0.469 | 2.16   |
| HIST1H3B    | 0.472 | 2.32   |
| HIST1H3C    | 0.459 | 0.92   |
| HIST1H3D    | 0.864 | 5.36   |
| HIST1H3E    | 0.664 | 5.58   |
| HIST1H3F    | 0.466 | 1.27   |
| HIST1H3G    | 0.467 | 2.7    |
| HIST1H3H    | 0.981 | 18.81  |
| HIST1H3I    | 0.477 | 0.53   |
| HIST1H3J    | 0.478 | 0.35   |
| HIST1H4A    | 0.372 | 4.08   |
| HIST1H4B    | 0.357 | 0.94   |
| HIST1H4C    | 0.39  | 1.3    |
| HIST1H4D    | 0.367 | 0.46   |
| HIST1H4E    | 0.377 | 5.81   |
| HIST1H4F    | 0.368 | 1.38   |
| HIST1H4G    | 0.367 | 0      |
| HIST1H4H    | 0.374 | 24.55  |
| HIST1H4I    | 0.37  | 1.14   |
| HIST1H4J    | 0.356 | 7.57   |
| HIST1H4K    | 0.354 | 15.23  |
| HIST1H4L    | 0.364 | 0.23   |
| HIST1H4PS1  | 0.171 | 0      |
| HIST2H2AA3  | 0.715 | 111.81 |
| HIST2H2AA4  | 0.534 | 43.06  |
| HIST2H2AB   | 0.448 | 1.13   |

|            |        |         |
|------------|--------|---------|
| HIST2H2AC  | 0.437  | 1.35    |
| HIST2H2BA  | 0.381  | 0       |
| HIST2H2BC  | 0.582  | 6.22    |
| HIST2H2BD  | 0.495  | 1.36    |
| HIST2H2BE  | 2.223  | 40.21   |
| HIST2H2BF  | 1.797  | 1.13    |
| HIST2H3A   | 0.507  | 0.83    |
| HIST2H3C   | 0.507  | 1       |
| HIST2H3D   | 0.543  | 0       |
| HIST2H3PS2 | 0.411  | 0.2     |
| HIST2H4A   | 0.396  | 38.29   |
| HIST2H4B   | 0.396  | 32.76   |
| HIST3H2A   | 0.496  | 0       |
| HIST3H2BA  | 0.379  | 0       |
| HIST3H2BB  | 0.452  | 0       |
| HIST3H3    | 0.481  | 0       |
| HIST4H4    | 0.412  | 1.63    |
| HIVEP1     | 9.026  | 0.97    |
| HIVEP2     | 9.086  | 7.33    |
| HIVEP3     | 9.108  | 3.7     |
| HK1        | 4.528  | 10.1    |
| HK2        | 7.093  | 1.87    |
| HK3        | 3.05   | 0.61    |
| HKDC1      | 3.679  | 0.03    |
| HKR1       | 2.929  | 6.18    |
| HLA-16     | 2.51   | 0.2     |
| HLA-21     | 1.117  | 0.23    |
| HLA-75     | 3.576  | 0       |
| HLA-80     | 3.225  | 0       |
| HLA-90     | 6.092  | 0       |
| HLA-A      | 3.04   | 286.63  |
| HLA-B      | 3.036  | 258.95  |
| HLA-C      | 4.787  | 26.5    |
| HLA-DMA    | 3.222  | 0       |
| HLA-DMB    | 4.074  | 7.82    |
| HLA-DOA    | 10.455 | 7.22    |
| HLA-DOB    | 2.644  | 21.57   |
| HLA-DPA1   | 3.471  | 8.64    |
| HLA-DPB1   | 3.002  | 321.68  |
| HLA-DPB2   | 51.612 | 5.36    |
| HLA-DQA1   | 5.039  | 74.89   |
| HLA-DQA2   | 5.141  | 0.07    |
| HLA-DQB1   | 4.018  | 153.67  |
| HLA-DQB2   | 3.177  | 0.24    |
| HLA-DRA    | 3.756  | 46.65   |
| HLA-DRB1   | 3.739  | 187.01  |
| HLA-DRB2   | 15.03  | 0.9     |
| HLA-DRB3   | 2.316  | 0       |
| HLA-DRB4   | 2.387  | 0.04    |
| HLA-DRB5   | 1.171  | 1028.17 |



|          |        |        |
|----------|--------|--------|
| HLA-DRB6 | 8.525  | 1.3    |
| HLA-DRB7 | 19.496 | 0.01   |
| HLA-DRB8 | 2.537  | 0      |
| HLA-DRB9 | 1.811  | 0      |
| HLA-E    | 5.07   | 1.31   |
| HLA-F    | 3.564  | 2.1    |
| HLA-G    | 5.554  | 0.03   |
| HLA-H    | 11.492 | 0.21   |
| HLA-J    | 2.775  | 0.09   |
| HLA-K    | 3.252  | 0.55   |
| HLA-L    | 14.499 | 0.03   |
| HLCS     | 5.977  | 1.39   |
| HLF      | 4.01   | 0      |
| HLTF     | 6.573  | 2.47   |
| HLX1     | 2.257  | 45.76  |
| HLXB9    | 4.353  | 0      |
| HM13     | 4.009  | 31.85  |
| HMBOX1   | 2.423  | 1.39   |
| HMBS     | 1.655  | 10.18  |
| HMCN1    | 18.206 | 0.01   |
| HMCN2    | 9.649  | 0      |
| HMFN0672 | 2.633  | 0.13   |
| HMG14P   | 0.576  | 0      |
| HMG17L1  | 1.46   | 0.06   |
| HMG17L2  | 0.265  | 0      |
| HMG17P1  | 2.288  | 0.03   |
| HMG1L1   | 0.636  | 1.46   |
| HMG1L3   | 0.446  | 0.37   |
| HMG1L4   | 0.566  | 0.3    |
| HMG1L5   | 0.997  | 4.06   |
| HMG1L8   | 1.609  | 0.15   |
| HMG1L9   | 1.575  | 1.87   |
| HMG20A   | 3.885  | 8.57   |
| HMG20B   | 1.584  | 50.63  |
| HMG2L1   | 5.262  | 2.91   |
| HMG4L    | 0.888  | 0.09   |
| HMG4L2   | 0.581  | 0.14   |
| HMGA1    | 2.618  | 125.91 |
| HMGA1L1  | 2.082  | 0.93   |
| HMGA1L2  | 1.397  | 8.87   |
| HMGA1L3  | 1.814  | 8.83   |
| HMGA2    | 4.609  | 0.4    |
| HMGB1    | 4.156  | 22.5   |
| HMGB1P   | 0.972  | 0.26   |
| HMGB2    | 1.264  | 216.92 |
| HMGB3    | 3.556  | 4.84   |
| HMGB4    | 2.981  | 0      |
| HMGCL    | 1.608  | 12.68  |
| HMGCLL1  | 2.532  | 0      |
| HMGCR    | 4.475  | 5.86   |

|           |         |        |
|-----------|---------|--------|
| HMGCS1    | 3.336   | 4.55   |
| HMGCS2    | 2.046   | 0      |
| HMGN1     | 1.304   | 56     |
| HMGN1P1   | 0.936   | 0.27   |
| HMGN2     | 1.287   | 65.39  |
| HMGN2P    | 0.677   | 0      |
| HMGN2P2   | 1.097   | 0.46   |
| HMGN3     | 1.72    | 22.13  |
| HMGN4     | 1.969   | 21.52  |
| HMHA1     | 4.264   | 62.47  |
| HMHB1     | 0.384   | 11.85  |
| HMMR      | 2.988   | 4.6    |
| HMOX1     | 1.55    | 2.29   |
| HMOX2     | 1.626   | 19.74  |
| HMP19     | 2.335   | 0      |
| HMSD      | 12.607  | 0      |
| HMX1      | 1.896   | 0      |
| HMX2      | 1.628   | 0      |
| HMX3      | 2.163   | 0      |
| HN1       | 3.463   | 15.33  |
| HN1L      | 3.683   | 12.92  |
| HNF4A     | 4.04    | 0      |
| HNF4G     | 4.1     | 0      |
| HNMT      | 4.178   | 0.93   |
| hnRNPA1p  | 0.892   | 1.04   |
| HNRNPG-T  | 2.097   | 0      |
| HNRPA0    | 2.967   | 83.5   |
| HNRPA1    | 1.925   | 46.82  |
| HNRPA1L-2 | 1.354   | 0.19   |
| HNRPA1L3  | 1.73    | 0.25   |
| HNRPA1P3  | 0.465   | 0      |
| HNRPA1P4  | 316.052 | 0      |
| HNRPA1P5  | 0.7     | 0.12   |
| HNRPA1P6  | 0.978   | 7.24   |
| HNRPA2B1  | 3.655   | 212.7  |
| HNRPA3    | 2.566   | 30.69  |
| HNRPA3P1  | 3.006   | 1.09   |
| HNRPAB    | 2.068   | 75.35  |
| HNRPC     | 2.337   | 171    |
| HNRPCL1   | 1.108   | 12.32  |
| HNRPCP    | 1.613   | 4.96   |
| HNRPD     | 2.257   | 147.2  |
| HNRPDL    | 3.509   | 65.58  |
| HNRPDP    | 1.036   | 28.95  |
| HNRPF     | 2.591   | 115.77 |
| HNRPH1    | 2.907   | 121.45 |
| HNRPH2    | 2.42    | 45.46  |
| HNRPH3    | 2.436   | 66.5   |
| HNRPK     | 4.053   | 99.82  |
| HNRPL     | 2.397   | 120.93 |

|             |       |        |
|-------------|-------|--------|
| HNRPLL      | 2.035 | 0.16   |
| HNRPM       | 2.76  | 99.98  |
| HNRPR       | 2.663 | 70.41  |
| HNRPU       | 7.48  | 77.63  |
| HNRPUL1     | 5.721 | 73.27  |
| HNRPUL2     | 5.222 | 61.58  |
| HNRPUP      | 0.651 | 106.49 |
| HNT         | 3.375 | 0      |
| HOMER1      | 4.214 | 0.54   |
| HOMER2      | 3.114 | 2.03   |
| HOMER3      | 1.517 | 8.05   |
| HOMEZ       | 3.665 | 4.21   |
| HOM-TES-103 | 3.215 | 9.36   |
| HOOK1       | 2.457 | 0      |
| HOOK2       | 2.513 | 5.13   |
| HOOK3       | 3.685 | 2.72   |
| HOP         | 1.368 | 0.25   |
| HORMAD1     | 1.879 | 0.09   |
| HORMAD2     | 1.895 | 0      |
| HOXA1       | 9.602 | 0.03   |
| HOXA10      | 6.3   | 0      |
| HOXA11      | 5.306 | 0.02   |
| HOXA11S     | 3.098 | 0      |
| HOXA13      | 5.027 | 0.07   |
| HOXA2       | 3.556 | 0      |
| HOXA3       | 7.437 | 0      |
| HOXA4       | 3.688 | 0      |
| HOXA5       | 2.664 | 0      |
| HOXA6       | 1.726 | 0      |
| HOXA7       | 4.036 | 0      |
| HOXA9       | 4.114 | 0.02   |
| HOXB1       | 1.014 | 0      |
| HOXB13      | 3.038 | 0      |
| HOXB2       | 1.604 | 0.26   |
| HOXB3       | 3.618 | 0.03   |
| HOXB4       | 2.033 | 0.91   |
| HOXB5       | 1.821 | 0      |
| HOXB6       | 1.676 | 0      |
| HOXB7       | 1.367 | 5.23   |
| HOXB8       | 1.823 | 0      |
| HOXB9       | 2.701 | 0      |
| HOXC10      | 1.96  | 0.04   |
| HOXC11      | 2.037 | 0      |
| HOXC12      | 0.849 | 0      |
| HOXC13      | 2.396 | 0      |
| HOXC4       | 2.346 | 0      |
| HOXC5       | 3.254 | 0      |
| HOXC6       | 2.584 | 0.13   |
| HOXC8       | 2.29  | 0      |
| HOXC9       | 1.542 | 0.11   |

|          |       |        |
|----------|-------|--------|
| HOXD1    | 2.069 | 240.74 |
| HOXD10   | 1.804 | 0      |
| HOXD11   | 1.463 | 0      |
| HOXD12   | 0.841 | 0      |
| HOXD13   | 1.461 | 0      |
| HOXD3    | 2.299 | 0      |
| HOXD4    | 1.298 | 0      |
| HOXD8    | 1.879 | 0      |
| HOXD9    | 2.089 | 0.04   |
| HP       | 1.433 | 7.41   |
| HP1BP3   | 2.792 | 47.7   |
| HPCA     | 1.406 | 0      |
| HPCAL1   | 2.168 | 58.16  |
| HPCAL4   | 4.259 | 0      |
| HPD      | 1.423 | 0.12   |
| HPGD     | 2.537 | 0      |
| H-plk    | 5.748 | 1.29   |
| HPN      | 2.568 | 0.88   |
| HPR      | 1.242 | 0.68   |
| HPRT1    | 1.331 | 11.64  |
| HPRTP2   | 1.108 | 1.75   |
| HPS1     | 6.336 | 12.41  |
| HPS3     | 4.451 | 2.14   |
| HPS4     | 7.498 | 67.09  |
| HPS5     | 5.115 | 2.72   |
| HPS6     | 2.647 | 5.76   |
| HPSE     | 1.793 | 2.35   |
| HPSE2    | 2.293 | 0      |
| HPX      | 1.389 | 0      |
| HR       | 4.981 | 0.1    |
| HRAS     | 1.251 | 9.56   |
| HRASLS   | 1.062 | 0      |
| HRASLS2  | 0.742 | 0      |
| HRASLS3  | 1.066 | 0.16   |
| HRASLS5  | 1.166 | 0      |
| HRB      | 4.878 | 5.69   |
| HRBL     | 9.786 | 11.06  |
| HRC      | 2.385 | 0      |
| HRG      | 1.952 | 0      |
| HRH1     | 3.868 | 0.24   |
| HRH2     | 1.847 | 8.4    |
| HRH3     | 2.671 | 0      |
| HRH4     | 3.668 | 0      |
| HRK      | 0.697 | 0.36   |
| HRNBP3   | 0.445 | 0      |
| HRNR     | 9.623 | 0      |
| HRSP12   | 1.011 | 3.59   |
| HS1BP3   | 2.403 | 4.14   |
| HS2ST1   | 6.714 | 3.2    |
| HS322B1A | 7.385 | 0      |

|           |        |        |
|-----------|--------|--------|
| HS3ST1    | 1.965  | 1.8    |
| HS3ST2    | 1.952  | 0.13   |
| HS3ST3A1  | 2.527  | 0.23   |
| HS3ST3B1  | 2.698  | 6.46   |
| HS3ST4    | 2.808  | 0      |
| HS3ST5    | 1.041  | 0.08   |
| HS3ST6    | 0.936  | 0      |
| HS6ST1    | 2.151  | 5.99   |
| HS6ST2    | 4.441  | 0      |
| HS6ST3    | 7.8    | 0      |
| HSBP1     | 1.891  | 14.88  |
| HSBP1P1   | 0.521  | 10.35  |
| HSCB      | 1.09   | 5.72   |
| HSD11B1   | 1.512  | 0.06   |
| HSD11B1L  | 3.428  | 0.64   |
| HSD11B2   | 1.884  | 0      |
| HSD17B1   | 2.23   | 6      |
| HSD17B10  | 1.045  | 47.4   |
| HSD17B11  | 1.675  | 26.75  |
| HSD17B12  | 2.383  | 13.29  |
| HSD17B13  | 2.377  | 0.03   |
| HSD17B14  | 1.237  | 2.73   |
| HSD17B2   | 1.427  | 0      |
| HSD17B3   | 1.134  | 0      |
| HSD17B4   | 2.594  | 17.96  |
| HSD17B6   | 1.512  | 0.17   |
| HSD17B7   | 1.519  | 2.39   |
| HSD17B7P2 | 24.055 | 0.09   |
| HSD17B8   | 2.967  | 0      |
| HSD3B1    | 1.648  | 0      |
| HSD3B2    | 1.669  | 0      |
| HSD3B7    | 2.17   | 0.54   |
| HSDL1     | 3.488  | 1.89   |
| HSDL2     | 3.21   | 9.5    |
| HSF1      | 2.137  | 42.18  |
| HSF2      | 2.445  | 2.52   |
| HSF2BP    | 1.899  | 0.22   |
| HSF4      | 1.546  | 4.2    |
| HSF5      | 4.107  | 0.08   |
| HSFX1     | 2.019  | 0      |
| HSFY1     | 2.816  | 0      |
| HSFY2     | 2.834  | 0      |
| HSH2D     | 2.367  | 23.7   |
| HSMPP8    | 3.234  | 13.88  |
| HSN2      | 1.305  | 0.25   |
| HSP40     | 2.877  | 0.11   |
| HSP90AA1  | 4.227  | 186.89 |
| HSP90AA2  | 3.218  | 33.74  |
| HSP90AA3P | 2.81   | 1.08   |
| HSP90AA4P | 2.287  | 4.53   |

|           |        |        |
|-----------|--------|--------|
| HSP90AB1  | 2.538  | 501.34 |
| HSP90AB2P | 1.277  | 21.37  |
| HSP90AB3P | 2.546  | 44.83  |
| HSP90AB4P | 3.541  | 0.12   |
| HSP90AB5P | 2.212  | 0      |
| HSP90B1   | 2.78   | 178.38 |
| HSP90B2P  | 2.083  | 24.11  |
| HSP90B3P  | 10.13  | 1.33   |
| HSPA12A   | 7.196  | 0      |
| HSPA12B   | 3.346  | 55.92  |
| HSPA14    | 1.806  | 2.29   |
| HSPA1A    | 7.149  | 0.24   |
| HSPA1B    | 7.531  | 0      |
| HSPA1L    | 7.527  | 0      |
| HSPA2     | 2.464  | 5.06   |
| HSPA4     | 4.091  | 21.33  |
| HSPA4L    | 3.27   | 0.03   |
| HSPA5     | 3.908  | 138.21 |
| HSPA6     | 2.652  | 1.65   |
| HSPA8     | 2.42   | 396.75 |
| HSPA9     | 2.85   | 57.31  |
| HSPA9P    | 2.733  | 10.48  |
| HSPB1     | 1.694  | 358.58 |
| HSPB2     | 0.802  | 0      |
| HSPB3     | 0.763  | 0      |
| HSPB6     | 1.457  | 1.16   |
| HSPB7     | 2.557  | 0      |
| HSPB8     | 2.002  | 0.54   |
| HSPB9     | 0.48   | 0      |
| HSPBAP1   | 1.936  | 2.52   |
| HSPBP1    | 1.769  | 16.38  |
| HSPC049   | 6.358  | 6.56   |
| HSPC072   | 0.963  | 0      |
| HSPC105   | 1.232  | 0      |
| HSPC111   | 1.42   | 32.33  |
| HSPC142   | 1.464  | 40.33  |
| HSPC148   | 1.017  | 23.69  |
| HSPC152   | 0.583  | 222.37 |
| HSPC159   | 0.771  | 1.2    |
| HSPC171   | 0.821  | 19.49  |
| HSPC268   | 2.024  | 6.87   |
| HSPD1     | 2.436  | 56.99  |
| HSPDP3    | 1.787  | 0.14   |
| HSPDP7    | 2.349  | 0.03   |
| HSPE1     | 0.538  | 35.23  |
| HSPEP1    | 0.318  | 0      |
| HSPEP2    | 0.465  | 7.25   |
| HSPG2     | 14.288 | 3.31   |
| HSPH1     | 3.668  | 17.43  |
| HSZFP36   | 2.368  | 0.85   |

|         |        |       |
|---------|--------|-------|
| HTATIP  | 2.94   | 17.79 |
| HTATIP2 | 1.418  | 8.91  |
| HTATSF1 | 2.759  | 17    |
| HTF9C   | 3.12   | 15.07 |
| HTN1    | 0.537  | 0     |
| HTN3    | 0.524  | 0     |
| HTR1A   | 1.269  | 0     |
| HTR1B   | 1.173  | 0     |
| HTR1D   | 2.835  | 0     |
| HTR1E   | 1.913  | 0     |
| HTR1F   | 1.101  | 0     |
| HTR2A   | 3.009  | 0     |
| HTR2B   | 2.227  | 0.08  |
| HTR2C   | 4.751  | 0     |
| HTR3A   | 2.654  | 0     |
| HTR3B   | 1.817  | 0     |
| HTR3C   | 1.699  | 0     |
| HTR3D   | 1.459  | 0     |
| HTR3E   | 1.912  | 0     |
| HTR4    | 4.519  | 0     |
| HTR5A   | 4.803  | 0     |
| HTR6    | 1.984  | 0.04  |
| HTR7    | 7.495  | 0.04  |
| HTR7P   | 7.289  | 0.27  |
| HTRA1   | 2.103  | 0.32  |
| HTRA2   | 2.55   | 21.14 |
| HTRA3   | 2.537  | 38.25 |
| HTRA4   | 2.079  | 6.28  |
| HUNK    | 7.385  | 0     |
| HUS1    | 4.286  | 1.61  |
| HUS1B   | 1.026  | 0.25  |
| HUWE1   | 13.644 | 17.78 |
| HVCN1   | 2.075  | 35.48 |
| HYAL1   | 6.246  | 0     |
| HYAL2   | 1.95   | 8.21  |
| HYAL3   | 1.942  | 2     |
| HYAL4   | 4.814  | 0     |
| HYALP1  | 12.55  | 0     |
| HYDIN   | 3.659  | 0     |
| HYI     | 2.096  | 11.69 |
| HYLS1   | 1.81   | 4.38  |
| HYMAI   | 5.005  | 0     |
| HYOU1   | 4.556  | 36.2  |
| HYPE    | 1.651  | 0.46  |
| HYPK    | 1.349  | 36.78 |
| IAH1    | 0.906  | 22.96 |
| IAPP    | 1.462  | 0     |
| IARS    | 4.653  | 23.75 |
| IARS2   | 3.549  | 14.91 |
| IBRDC1  | 1.784  | 0     |

|          |       |        |
|----------|-------|--------|
| IBRDC2   | 4.768 | 0.07   |
| IBRDC3   | 1.987 | 19.84  |
| IBSP     | 1.081 | 0      |
| IBTK     | 5.775 | 4.19   |
| ICA1     | 4.907 | 0.22   |
| ICA1L    | 4.691 | 0.09   |
| ICAM1    | 2.984 | 6.44   |
| ICAM2    | 1.607 | 29.4   |
| ICAM3    | 1.742 | 30.37  |
| ICAM4    | 3.023 | 4.98   |
| ICAM5    | 3.001 | 0.42   |
| ICEBERG  | 0.431 | 0      |
| ICHTHYIN | 3.269 | 0      |
| ICK      | 6.403 | 2.21   |
| ICMT     | 4.815 | 12.32  |
| ICOS     | 2.613 | 0      |
| ICOSLG   | 4.78  | 14.29  |
| ICT1     | 0.879 | 10.73  |
| ID1      | 2.106 | 0.12   |
| ID2      | 1.364 | 12.05  |
| ID2B     | 1.174 | 1.01   |
| ID3      | 1.204 | 71.5   |
| ID4      | 2.344 | 0.07   |
| IDE      | 3.592 | 4.05   |
| IDH1     | 2.329 | 5.82   |
| IDH2     | 1.733 | 71.21  |
| IDH3A    | 2.665 | 10.62  |
| IDH3B    | 2.069 | 33.63  |
| IDH3G    | 1.981 | 38.48  |
| IDI1     | 2.137 | 19.55  |
| IDI2     | 1.359 | 1.55   |
| IDS      | 2.75  | 1.29   |
| IDSP1    | 1.625 | 0.2    |
| IDUA     | 2.186 | 9.36   |
| IER2     | 2.05  | 45.73  |
| IER3     | 5.457 | 0      |
| IER3IP1  | 1.45  | 11.15  |
| IER5     | 2.337 | 61.38  |
| IER5L    | 1.224 | 0.14   |
| IFI16    | 2.704 | 100.06 |
| IFI27    | 0.652 | 3.36   |
| IFI30    | 1.032 | 164.48 |
| IFI35    | 1.164 | 37.05  |
| IFI44    | 1.681 | 4.81   |
| IFI44L   | 2.048 | 0.13   |
| IFI6     | 1.012 | 22.05  |
| IFIH1    | 3.421 | 2.93   |
| IFIT1    | 3.344 | 0.37   |
| IFIT1L   | 1.972 | 0.99   |
| IFIT1P   | 0.713 | 0      |



|         |       |        |
|---------|-------|--------|
| IFIT2   | 3.046 | 1.66   |
| IFIT3   | 2.505 | 0.47   |
| IFIT5   | 3.914 | 1.85   |
| IFITM1  | 0.855 | 394.38 |
| IFITM2  | 0.904 | 553.5  |
| IFITM3  | 0.808 | 676.6  |
| IFITM4P | 1.028 | 0      |
| IFITM5  | 0.733 | 0      |
| IFITM8P | 0.399 | 0.21   |
| IFLTD1  | 1.718 | 0      |
| IFNA1   | 0.876 | 0      |
| IFNA10  | 0.963 | 0      |
| IFNA13  | 0.653 | 0      |
| IFNA14  | 0.99  | 0      |
| IFNA16  | 0.939 | 0      |
| IFNA17  | 0.98  | 0      |
| IFNA2   | 1.143 | 0      |
| IFNA21  | 0.984 | 0      |
| IFNA4   | 0.978 | 0      |
| IFNA5   | 0.57  | 0      |
| IFNA6   | 0.57  | 0      |
| IFNA7   | 0.737 | 0      |
| IFNA8   | 1.042 | 0      |
| IFNAP22 | 0.57  | 0      |
| IFNAR1  | 6.095 | 5.5    |
| IFNAR2  | 3.178 | 8.62   |
| IFNB1   | 0.84  | 0      |
| IFNE1   | 1.475 | 0      |
| IFNG    | 1.21  | 0.14   |
| IFNGR1  | 2.059 | 8.59   |
| IFNGR2  | 2.386 | 9.36   |
| IFNK    | 1.14  | 0      |
| IFNW1   | 1.514 | 0      |
| IFNWP12 | 0.31  | 0      |
| IFNWP19 | 1.359 | 0      |
| IFP38   | 1.051 | 0      |
| IFRD1   | 5.402 | 2.6    |
| IFRD2   | 2.045 | 22.32  |
| IFRG15  | 0.396 | 6.81   |
| IFT122  | 4.348 | 4.41   |
| IFT140  | 4.935 | 2.2    |
| IFT172  | 5.36  | 5      |
| IFT20   | 0.974 | 8.99   |
| IFT52   | 1.675 | 9.86   |
| IFT57   | 3.38  | 18.57  |
| IFT74   | 1.995 | 1.1    |
| IFT80   | 4.292 | 3.27   |
| IFT81   | 4.781 | 0.67   |
| IFT88   | 3.256 | 1.58   |
| IGBP1   | 1.661 | 46.15  |

|          |       |        |
|----------|-------|--------|
| IGF1     | 7.236 | 0.01   |
| IGF1R    | 4.99  | 1.22   |
| IGF2     | 3.97  | 1.02   |
| IGF2AS   | 2.061 | 0      |
| IGF2BP1  | 8.769 | 0      |
| IGF2BP2  | 3.671 | 18.84  |
| IGF2BP3  | 8.318 | 2.65   |
| IGF2R    | 9.091 | 16.79  |
| IGFALS   | 2.056 | 0      |
| IGFBP1   | 3.79  | 0      |
| IGFBP2   | 1.43  | 0.36   |
| IGFBP3   | 6.068 | 0.22   |
| IGFBP4   | 2.236 | 126.28 |
| IGFBP5   | 6.238 | 1.19   |
| IGFBP6   | 0.966 | 0.08   |
| IGFBP7   | 1.11  | 105.02 |
| IGFBPL1  | 1.093 | 0      |
| IGFL1    | 0.769 | 0      |
| IGFL2    | 0.885 | 0      |
| IGFL3    | 0.662 | 0      |
| IGFL4    | 0.573 | 0      |
| IGHA1    | 1.061 | 97.89  |
| IGHA2    | 1.019 | 8.84   |
| IGHD     | 1.154 | 8.91   |
| IGHD1-1  | 0.1   | 0      |
| IGHD1-14 | 0.1   | 0      |
| IGHD1-20 | 0.1   | 0      |
| IGHD1-26 | 0.1   | 0      |
| IGHD1-7  | 0.1   | 0      |
| IGHD2-15 | 0.1   | 0      |
| IGHD2-2  | 0.1   | 0      |
| IGHD2-21 | 0.1   | 0      |
| IGHD2-8  | 0.1   | 0      |
| IGHD3-10 | 0.1   | 0      |
| IGHD3-16 | 0.1   | 0      |
| IGHD3-22 | 0.1   | 0      |
| IGHD3-3  | 0.1   | 0      |
| IGHD3-9  | 0.1   | 0      |
| IGHD4-11 | 0.1   | 0      |
| IGHD4-17 | 0.1   | 0      |
| IGHD4-23 | 0.1   | 0      |
| IGHD4-4  | 0.1   | 0      |
| IGHD5-12 | 0.1   | 0      |
| IGHD5-18 | 0.1   | 0      |
| IGHD5-24 | 0.1   | 0      |
| IGHD5-5  | 0.1   | 0      |
| IGHD6-13 | 0.1   | 0      |
| IGHD6-19 | 0.1   | 0      |
| IGHD6-25 | 0.1   | 0      |
| IGHD6-6  | 0.1   | 0      |

|             |        |        |
|-------------|--------|--------|
| IGHD7-27    | 0.1    | 0      |
| IGHE        | 1.286  | 0.07   |
| IGHEP1      | 1.951  | 0      |
| IGHEP2      | 1.258  | 0.07   |
| IGHG1       | 0.992  | 35.92  |
| IGHG2       | 0.98   | 10.83  |
| IGHG3       | 2.044  | 41.54  |
| IGHG4       | 0.983  | 1.54   |
| IGHGP       | 3.089  | 6.35   |
| IGHJ1       | 0.1    | 0      |
| IGHJ1P      | 0.1    | 0      |
| IGHJ2       | 0.1    | 0.84   |
| IGHJ2P      | 0.1    | 0      |
| IGHJ3       | 0.1    | 0.84   |
| IGHJ3P      | 0.1    | 1.68   |
| IGHJ4       | 0.1    | 8.42   |
| IGHJ5       | 0.1    | 4.22   |
| IGHJ6       | 0.262  | 11.9   |
| IGHM        | 2.074  | 194.55 |
| IGHMBP2     | 3.891  | 3.2    |
| IGHV1-12    | 0.495  | 0      |
| IGHV1-14    | 0.25   | 0      |
| IGHV1-17    | 0.789  | 0      |
| IGHV1-18    | 0.353  | 0.24   |
| IGHV1-2     | 0.353  | 0.71   |
| IGHV1-24    | 0.353  | 1.19   |
| IGHV1-3     | 0.353  | 0.95   |
| IGHV1-45    | 0.353  | 0      |
| IGHV1-46    | 0.353  | 1.19   |
| IGHV1-58    | 0.353  | 0      |
| IGHV1-67    | 0.797  | 0      |
| IGHV1-68    | 0.871  | 0      |
| IGHV1-69    | 0.353  | 3.1    |
| IGHV1-8     | 0.353  | 0      |
| IGHV1OR15-1 | 13.265 | 0.01   |
| IGHV2-10    | 0.796  | 0      |
| IGHV2-26    | 0.358  | 0.94   |
| IGHV2-5     | 0.358  | 4.94   |
| IGHV2-70    | 0.358  | 2.12   |
| IGHV3-11    | 0.353  | 0.24   |
| IGHV3-13    | 0.35   | 0.24   |
| IGHV3-15    | 0.359  | 2.35   |
| IGHV3-16    | 0.353  | 0      |
| IGHV3-19    | 0.293  | 0.29   |
| IGHV3-20    | 0.353  | 0.24   |
| IGHV3-21    | 0.353  | 0.95   |
| IGHV3-22    | 0.821  | 0.92   |
| IGHV3-23    | 0.353  | 2.86   |
| IGHV3-25    | 0.807  | 0      |
| IGHV3-29    | 0.813  | 0.1    |

|            |       |       |
|------------|-------|-------|
| IGHV3-30   | 0.353 | 1.67  |
| IGHV3-30-2 | 0.804 | 0     |
| IGHV3-32   | 0.813 | 0.1   |
| IGHV3-33   | 0.353 | 2.15  |
| IGHV3-33-2 | 0.804 | 0     |
| IGHV3-35   | 0.353 | 0.24  |
| IGHV3-36   | 0.821 | 0     |
| IGHV3-37   | 0.801 | 0     |
| IGHV3-38   | 0.347 | 0     |
| IGHV3-41   | 0.807 | 0     |
| IGHV3-42   | 0.767 | 0     |
| IGHV3-43   | 0.355 | 0.71  |
| IGHV3-47   | 0.81  | 0     |
| IGHV3-48   | 0.353 | 0.95  |
| IGHV3-49   | 0.359 | 0.23  |
| IGHV3-50   | 0.81  | 0     |
| IGHV3-52   | 0.804 | 0.1   |
| IGHV3-53   | 0.35  | 1.68  |
| IGHV3-54   | 0.803 | 0     |
| IGHV3-57   | 0.306 | 0     |
| IGHV3-6    | 0.807 | 0.1   |
| IGHV3-60   | 0.811 | 0     |
| IGHV3-62   | 0.809 | 0.1   |
| IGHV3-63   | 0.833 | 0.2   |
| IGHV3-64   | 0.353 | 1.19  |
| IGHV3-65   | 0.894 | 0     |
| IGHV3-66   | 0.35  | 1.2   |
| IGHV3-7    | 0.353 | 1.19  |
| IGHV3-71   | 0.821 | 13.96 |
| IGHV3-72   | 0.359 | 0.24  |
| IGHV3-73   | 0.359 | 0.23  |
| IGHV3-74   | 0.353 | 3.34  |
| IGHV3-75   | 0.836 | 0     |
| IGHV3-76   | 0.799 | 0     |
| IGHV3-79   | 0.812 | 0.1   |
| IGHV3-9    | 0.355 | 0     |
| IGHV4-28   | 0.353 | 0.71  |
| IGHV4-31   | 0.356 | 0.24  |
| IGHV4-34   | 0.35  | 2.65  |
| IGHV4-39   | 0.356 | 4.02  |
| IGHV4-4    | 0.35  | 1.45  |
| IGHV4-55   | 0.789 | 0     |
| IGHV4-59   | 0.35  | 57.28 |
| IGHV4-61   | 0.356 | 2.84  |
| IGHV4-80   | 0.719 | 0     |
| IGHV5-51   | 0.353 | 3.58  |
| IGHV5-78   | 0.787 | 0.75  |
| IGHV6-1    | 0.365 | 2.54  |
| IGHV7-27   | 0.744 | 0     |
| IGHV7-34-1 | 0.784 | 0     |

|              |       |         |
|--------------|-------|---------|
| IGHV7-40     | 0.203 | 0       |
| IGHV7-56     | 0.786 | 0       |
| IGHV7-81     | 0.353 | 0.24    |
| IGHVII-1-1   | 0.452 | 0       |
| IGHVII-15-1  | 0.271 | 0       |
| IGHVII-20-1  | 0.501 | 0       |
| IGHVII-22-1  | 0.269 | 0       |
| IGHVII-26-2  | 0.313 | 0       |
| IGHVII-28-1  | 0.253 | 0       |
| IGHVII-30-1  | 0.274 | 0       |
| IGHVII-31-1  | 0.103 | 0       |
| IGHVII-33-1  | 0.274 | 0       |
| IGHVII-40-1  | 0.1   | 0       |
| IGHVII-43-1  | 0.209 | 0       |
| IGHVII-44-2  | 0.237 | 0       |
| IGHVII-46-1  | 0.493 | 0       |
| IGHVII-49-1  | 0.271 | 0       |
| IGHVII-51-2  | 0.263 | 0       |
| IGHVII-53-1  | 0.27  | 0       |
| IGHVII-60-1  | 0.269 | 0.63    |
| IGHVII-62-1  | 0.273 | 0       |
| IGHVII-65-1  | 0.273 | 0.31    |
| IGHVII-67-1  | 0.15  | 0       |
| IGHVII-74-1  | 0.169 | 0       |
| IGHVII-78-1  | 0.275 | 0       |
| IGHVIII-11-1 | 0.187 | 0       |
| IGHVIII-13-1 | 0.299 | 0       |
| IGHVIII-16-1 | 0.305 | 0       |
| IGHVIII-2-1  | 0.302 | 0       |
| IGHVIII-22-2 | 0.274 | 0       |
| IGHVIII-25-1 | 0.242 | 0       |
| IGHVIII-26-1 | 0.307 | 0       |
| IGHVIII-38-1 | 0.293 | 0       |
| IGHVIII-44   | 0.255 | 0       |
| IGHVIII-47-1 | 0.304 | 0       |
| IGHVIII-5-1  | 0.1   | 0       |
| IGHVIII-51-1 | 0.307 | 0       |
| IGHVIII-5-2  | 0.261 | 0       |
| IGHVIII-67-2 | 0.1   | 0       |
| IGHVIII-67-3 | 0.275 | 0       |
| IGHVIII-67-4 | 0.306 | 0       |
| IGHVIII-76-1 | 0.307 | 0       |
| IGHVIII-82   | 0.292 | 0       |
| IGHVIV-44-1  | 0.775 | 0       |
| IGJ          | 0.899 | 1061.99 |
| IGK@         | 0.1   | 0       |
| IGKC         | 0.323 | 200.29  |
| IGKDEL       | 0.1   | 0       |
| IGKJ1        | 0.1   | 5.06    |
| IGKJ2        | 0.1   | 2.52    |

|           |       |      |
|-----------|-------|------|
| IGKJ3     | 0.1   | 2.52 |
| IGKJ4     | 0.1   | 0.84 |
| IGKJ5     | 0.1   | 5.9  |
| IGKV1-12  | 0.351 | 1.44 |
| IGKV1-13  | 0.351 | 0    |
| IGKV1-16  | 0.351 | 1.44 |
| IGKV1-17  | 0.351 | 1.44 |
| IGKV1-22  | 0.823 | 0    |
| IGKV1-27  | 0.351 | 0.48 |
| IGKV1-32  | 0.832 | 0    |
| IGKV1-33  | 0.351 | 4.8  |
| IGKV1-35  | 0.826 | 0    |
| IGKV1-37  | 0.351 | 0.24 |
| IGKV1-39  | 0.351 | 7.2  |
| IGKV1-5   | 0.351 | 8.64 |
| IGKV1-6   | 0.351 | 0.72 |
| IGKV1-8   | 0.345 | 0    |
| IGKV1-9   | 0.351 | 2.64 |
| IGKV1D-12 | 0.351 | 0.72 |
| IGKV1D-13 | 0.351 | 0.96 |
| IGKV1D-16 | 0.351 | 0    |
| IGKV1D-17 | 0.351 | 0    |
| IGKV1D-22 | 0.823 | 0    |
| IGKV1D-27 | 0.828 | 0    |
| IGKV1D-32 | 0.832 | 0    |
| IGKV1D-33 | 0.351 | 3.6  |
| IGKV1D-35 | 0.826 | 0    |
| IGKV1D-42 | 0.351 | 0    |
| IGKV1D-43 | 0.351 | 0    |
| IGKV1D-8  | 0.351 | 0    |
| IGKV2-10  | 1.055 | 0    |
| IGKV2-14  | 1.127 | 0    |
| IGKV2-18  | 1.137 | 0    |
| IGKV2-19  | 0.267 | 0    |
| IGKV2-23  | 0.988 | 0    |
| IGKV2-24  | 0.36  | 4.68 |
| IGKV2-26  | 1.117 | 0    |
| IGKV2-28  | 0.36  | 5.85 |
| IGKV2-29  | 1.087 | 0.08 |
| IGKV2-30  | 0.36  | 1.87 |
| IGKV2-36  | 0.234 | 0    |
| IGKV2-38  | 0.24  | 0    |
| IGKV2-4   | 1.088 | 0    |
| IGKV2-40  | 0.314 | 1.34 |
| IGKV2D-10 | 1.127 | 0    |
| IGKV2D-14 | 1.127 | 0    |
| IGKV2D-18 | 1.137 | 0    |
| IGKV2D-19 | 0.267 | 0    |
| IGKV2D-23 | 1.569 | 0    |
| IGKV2D-24 | 0.36  | 0.7  |

|           |       |       |
|-----------|-------|-------|
| IGKV2D-26 | 1.115 | 0     |
| IGKV2D-28 | 0.359 | 0.94  |
| IGKV2D-29 | 0.362 | 0.23  |
| IGKV2D-30 | 0.36  | 0.94  |
| IGKV2D-36 | 0.234 | 0     |
| IGKV3-11  | 0.345 | 5.86  |
| IGKV3-15  | 0.345 | 3.66  |
| IGKV3-20  | 0.348 | 9.44  |
| IGKV3-25  | 2.108 | 0     |
| IGKV3-31  | 0.871 | 0     |
| IGKV3-34  | 0.881 | 0     |
| IGKV3-7   | 0.348 | 0     |
| IGKV3D-11 | 0.345 | 1.47  |
| IGKV3D-15 | 0.345 | 2.69  |
| IGKV3D-20 | 0.348 | 1.21  |
| IGKV3D-25 | 2.081 | 0     |
| IGKV3D-31 | 0.881 | 0     |
| IGKV3D-34 | 0.881 | 0     |
| IGKV3D-7  | 0.357 | 0     |
| IGKV4-1   | 0.363 | 8.12  |
| IGKV5-2   | 0.345 | 0.73  |
| IGKV6-21  | 0.342 | 0     |
| IGKV6D-21 | 0.342 | 0     |
| IGKV6D-41 | 0.347 | 0     |
| IGKV7-3   | 0.956 | 0.18  |
| IGL@      | 0.81  | 18.1  |
| IGLC1     | 0.318 | 29.4  |
| IGLC2     | 0.318 | 65.17 |
| IGLC3     | 0.318 | 29.93 |
| IGLC4     | 0.253 | 0     |
| IGLC5     | 0.309 | 0.27  |
| IGLC6     | 0.324 | 0.52  |
| IGLC7     | 0.318 | 18.27 |
| IGLJ1     | 0.1   | 0.84  |
| IGLJ2     | 0.1   | 0.84  |
| IGLJ3     | 0.1   | 3.37  |
| IGLJ4     | 0.1   | 0     |
| IGLJ5     | 0.1   | 0     |
| IGLJ6     | 0.1   | 0     |
| IGLJ7     | 0.1   | 0     |
| IGLJCOR18 | 0.432 | 0     |
| IGLL1     | 1.362 | 34.26 |
| IGLV10-54 | 0.296 | 0.57  |
| IGLV10-67 | 0.295 | 0     |
| IGLV11-55 | 0.312 | 0     |
| IGLV1-36  | 0.296 | 0     |
| IGLV1-40  | 0.299 | 2.25  |
| IGLV1-41  | 0.296 | 0     |
| IGLV1-44  | 0.296 | 2.85  |
| IGLV1-47  | 0.296 | 0.85  |

|          |       |      |
|----------|-------|------|
| IGLV1-50 | 0.299 | 0.28 |
| IGLV1-51 | 0.296 | 5.12 |
| IGLV1-62 | 0.298 | 0    |
| IGLV2-11 | 0.297 | 1.7  |
| IGLV2-14 | 0.297 | 3.68 |
| IGLV2-18 | 0.297 | 1.42 |
| IGLV2-23 | 0.297 | 9.65 |
| IGLV2-28 | 0.285 | 0    |
| IGLV2-33 | 0.297 | 0    |
| IGLV2-34 | 0.297 | 0.28 |
| IGLV2-5  | 0.298 | 1.41 |
| IGLV2-8  | 0.297 | 4.54 |
| IGLV3-1  | 0.285 | 8.57 |
| IGLV3-10 | 0.29  | 1.45 |
| IGLV3-12 | 0.29  | 0.58 |
| IGLV3-13 | 0.284 | 0    |
| IGLV3-15 | 0.285 | 0    |
| IGLV3-16 | 0.29  | 0.88 |
| IGLV3-17 | 0.281 | 0    |
| IGLV3-19 | 0.29  | 4.07 |
| IGLV3-2  | 0.284 | 0    |
| IGLV3-21 | 0.29  | 3.78 |
| IGLV3-22 | 0.284 | 0    |
| IGLV3-24 | 0.284 | 0    |
| IGLV3-25 | 0.29  | 6.1  |
| IGLV3-26 | 0.289 | 0    |
| IGLV3-27 | 0.284 | 0    |
| IGLV3-29 | 0.28  | 0    |
| IGLV3-30 | 0.295 | 0    |
| IGLV3-31 | 0.29  | 0    |
| IGLV3-32 | 0.29  | 0    |
| IGLV3-4  | 0.28  | 0    |
| IGLV3-6  | 0.284 | 0    |
| IGLV3-7  | 0.288 | 0    |
| IGLV3-9  | 0.285 | 0.59 |
| IGLV4-3  | 0.312 | 0    |
| IGLV4-60 | 0.299 | 0    |
| IGLV4-69 | 0.299 | 6.2  |
| IGLV5-37 | 0.312 | 1.08 |
| IGLV5-45 | 0.312 | 9.72 |
| IGLV5-48 | 0.312 | 8.64 |
| IGLV5-52 | 0.317 | 7.97 |
| IGLV6-57 | 0.296 | 3.42 |
| IGLV7-35 | 0.295 | 0    |
| IGLV7-43 | 0.294 | 0.57 |
| IGLV7-46 | 0.294 | 4.58 |
| IGLV8-61 | 0.296 | 1.99 |
| IGLV9-49 | 0.315 | 0.26 |
| IGLVI-20 | 0.286 | 0    |
| IGLVI-38 | 0.291 | 0    |



|              |        |       |
|--------------|--------|-------|
| IGLVI-42     | 0.291  | 0     |
| IGLVI-56     | 0.296  | 0     |
| IGLVI-63     | 0.297  | 0     |
| IGLVI-68     | 0.293  | 0     |
| IGLVI-70     | 0.293  | 0.58  |
| IGLVIV-53    | 0.313  | 0     |
| IGLVIV-59    | 0.324  | 0     |
| IGLVIV-64    | 0.319  | 0     |
| IGLVIV-65    | 0.307  | 0     |
| IGLVIV-66-1  | 0.316  | 0     |
| IGLVV-58     | 0.308  | 0     |
| IGLVV-66     | 0.303  | 0     |
| IGLVVI-22-1  | 0.29   | 0     |
| IGLVVI-25-1  | 0.3    | 0     |
| IGLVVII-41-1 | 0.299  | 0     |
| IGSF1        | 5.735  | 0     |
| IGSF10       | 7.872  | 0.03  |
| IGSF11       | 3.863  | 0.03  |
| IGSF2        | 3.324  | 0.05  |
| IGSF21       | 1.943  | 0.04  |
| IGSF22       | 3.935  | 0.2   |
| IGSF3        | 7.253  | 0.12  |
| IGSF6        | 1.028  | 0.33  |
| IGSF8        | 2.28   | 12.56 |
| IGSF9        | 3.994  | 0.27  |
| IGSF9B       | 7.298  | 0.03  |
| IHH          | 1.236  | 0     |
| IHPK1        | 4.65   | 12.61 |
| IHPK2        | 3.642  | 19.41 |
| IHPK3        | 2.614  | 0     |
| IK           | 1.784  | 65.54 |
| IKBKAP       | 5.902  | 5.28  |
| IKBKB        | 3.916  | 13.01 |
| IKBKE        | 3.263  | 2.91  |
| IKBKG        | 2.103  | 10.37 |
| IKIP         | 4.796  | 5.02  |
| IKZF1        | 10.039 | 52.67 |
| IKZF2        | 2.49   | 0.41  |
| IKZF3        | 4.694  | 11.91 |
| IKZF4        | 4.396  | 4     |
| IKZF5        | 2.9    | 2.67  |
| IL10         | 1.629  | 1.39  |
| IL10RA       | 3.649  | 11.54 |
| IL10RB       | 1.935  | 12.84 |
| IL11         | 2.354  | 0.07  |
| IL11RA       | 2.039  | 3.06  |
| IL12A        | 1.437  | 0.47  |
| IL12B        | 2.347  | 0.21  |
| IL12RB1      | 2.872  | 2.91  |
| IL12RB2      | 4.04   | 0.08  |

|          |       |       |
|----------|-------|-------|
| IL13     | 1.282 | 0     |
| IL13RA1  | 4.006 | 7.32  |
| IL13RA2  | 1.373 | 0     |
| IL15     | 2.093 | 0.08  |
| IL15RA   | 2.208 | 4.23  |
| IL16     | 14.09 | 10.02 |
| IL17A    | 1.859 | 0     |
| IL17B    | 0.695 | 1.33  |
| IL17C    | 1.045 | 0     |
| IL17D    | 1.861 | 0.72  |
| IL17F    | 0.808 | 0     |
| IL17RA   | 3.429 | 1.87  |
| IL17RB   | 4.303 | 0.27  |
| IL17RC   | 2.736 | 7.88  |
| IL17RD   | 4.455 | 0     |
| IL17RE   | 5.878 | 2.65  |
| IL18     | 1.145 | 3.38  |
| IL18BP   | 2.452 | 23.22 |
| IL18R1   | 3.522 | 0.14  |
| IL18RAP  | 2.668 | 0.09  |
| IL19     | 2.471 | 0     |
| IL1A     | 2.928 | 0     |
| IL1B     | 1.498 | 13.72 |
| IL1F10   | 1.441 | 0     |
| IL1F5    | 2.802 | 0     |
| IL1F6    | 0.477 | 0     |
| IL1F7    | 0.839 | 0.1   |
| IL1F8    | 1.739 | 0     |
| IL1F9    | 1.18  | 0     |
| IL1R1    | 4.907 | 0.1   |
| IL1R2    | 1.577 | 0     |
| IL1RAP   | 5.662 | 0.89  |
| IL1RAPL1 | 3.624 | 0     |
| IL1RAPL2 | 2.985 | 0     |
| IL1RL1   | 3.593 | 0     |
| IL1RL2   | 1.964 | 0     |
| IL1RN    | 2.353 | 0.25  |
| IL2      | 1.029 | 0     |
| IL20     | 1.234 | 0     |
| IL20RA   | 3.682 | 0     |
| IL21     | 0.616 | 0     |
| IL21R    | 4.269 | 11.17 |
| IL22     | 1.147 | 0     |
| IL22RA1  | 2.798 | 0.03  |
| IL22RA2  | 4.851 | 0     |
| IL23A    | 1.042 | 0.25  |
| IL23R    | 2.826 | 0.03  |
| IL24     | 2.05  | 3.49  |
| IL25     | 1.755 | 0     |
| IL26     | 1.047 | 0     |

|         |        |        |
|---------|--------|--------|
| IL27    | 1.044  | 0      |
| IL27RA  | 3.258  | 6.82   |
| IL28A   | 0.734  | 0      |
| IL28B   | 0.595  | 0      |
| IL28RA  | 8.959  | 0.87   |
| IL29    | 0.856  | 0      |
| IL2RA   | 2.306  | 22.54  |
| IL2RB   | 4.045  | 1.5    |
| IL2RG   | 1.451  | 218.05 |
| IL3     | 0.924  | 0      |
| IL31    | 0.904  | 0      |
| IL31RA  | 2.315  | 0      |
| IL32    | 1.527  | 6.45   |
| IL33    | 2.644  | 0      |
| IL3RA   | 1.71   | 40     |
| IL4     | 0.921  | 0      |
| IL4I1   | 2.406  | 2.45   |
| IL4R    | 3.862  | 42.88  |
| IL5     | 0.816  | 0      |
| IL5RA   | 3.005  | 0      |
| IL6     | 2.25   | 0      |
| IL6R    | 7.62   | 4.01   |
| IL6ST   | 4.393  | 2.01   |
| IL6STP  | 13.085 | 0.07   |
| IL7     | 2.078  | 0      |
| IL7R    | 2.295  | 7.01   |
| IL8     | 1.653  | 0      |
| IL8RA   | 2.486  | 0.14   |
| IL8RB   | 2.859  | 0.24   |
| IL8RBP  | 2.136  | 0.39   |
| IL9     | 0.591  | 0      |
| IL9R    | 7.78   | 0.04   |
| IL9RP4  | 7.117  | 0      |
| ILD1R1  | 2.659  | 0.03   |
| ILF2    | 1.612  | 95     |
| ILF3    | 8.692  | 38.62  |
| ILK     | 2.14   | 35.55  |
| ILKAP   | 2.424  | 7.61   |
| ILVBL   | 2.786  | 19.05  |
| IMAA    | 2.552  | 0.27   |
| IMM1P1L | 0.795  | 5.72   |
| IMM2P2L | 3.038  | 1.14   |
| IMMT    | 2.697  | 30.57  |
| IMMTP   | 2.823  | 1.7    |
| IMP3    | 1.16   | 41.25  |
| IMP4    | 1.36   | 41.81  |
| IMP5    | 2.055  | 0      |
| IMPA1   | 2.322  | 2.4    |
| IMPA2   | 1.5    | 3.88   |
| IMPACT  | 3.683  | 5.03   |

|        |        |        |
|--------|--------|--------|
| IMPAD1 | 2.6    | 4.08   |
| IMPDH1 | 7.392  | 6.93   |
| IMPDH2 | 1.695  | 198.64 |
| IMPG1  | 3.268  | 0      |
| IMPG2  | 4.454  | 0      |
| INA    | 3.226  | 0      |
| INADL  | 6.468  | 0      |
| INCA   | 0.466  | 10.84  |
| INCA1  | 1.383  | 2.01   |
| INCENP | 3.521  | 10.98  |
| INDO   | 1.572  | 0      |
| INDOL1 | 1.029  | 0      |
| INE1   | 0.941  | 0.71   |
| INE2   | 1.874  | 0.72   |
| ING1   | 5.121  | 3.6    |
| ING2   | 1.116  | 7.33   |
| ING3   | 6.05   | 1.99   |
| ING4   | 1.699  | 21.52  |
| ING5   | 5.198  | 3.13   |
| INGX   | 0.771  | 0.33   |
| INHA   | 1.423  | 0      |
| INHBA  | 4.35   | 0.06   |
| INHBB  | 3.514  | 0.58   |
| INHBC  | 1.99   | 0      |
| INHBE  | 2.437  | 0      |
| INMT   | 5.122  | 0.07   |
| INOC1  | 6.227  | 11.97  |
| INPP1  | 1.692  | 4.88   |
| INPP4A | 3.746  | 3.58   |
| INPP4B | 3.659  | 15.26  |
| INPP5A | 3.078  | 3.48   |
| INPP5B | 3.979  | 9.23   |
| INPP5D | 3.633  | 52.01  |
| INPP5E | 3.376  | 4.89   |
| INPP5F | 5.61   | 1.96   |
| INPPL1 | 4.733  | 31.79  |
| INS    | 0.45   | 0      |
| INSC   | 1.807  | 0.37   |
| INSIG1 | 14.232 | 1.24   |
| INSIG2 | 2.583  | 3.1    |
| INSL3  | 0.742  | 2.73   |
| INSL4  | 0.615  | 0      |
| INSL5  | 0.715  | 0      |
| INSL6  | 0.708  | 0      |
| INSM1  | 2.829  | 0      |
| INSM2  | 3.013  | 0      |
| INSR   | 8.541  | 20.69  |
| INSRR  | 4.147  | 0      |
| INTS1  | 15.165 | 7.53   |
| INTS10 | 2.537  | 14.08  |

|          |       |       |
|----------|-------|-------|
| INTS12   | 1.701 | 7.92  |
| INTS2    | 5.878 | 0.9   |
| INTS3    | 4.813 | 56.6  |
| INTS4    | 3.149 | 3.8   |
| INTS5    | 3.285 | 13.36 |
| INTS6    | 9.389 | 2.72  |
| INTS7    | 3.462 | 3.14  |
| INTS8    | 3.373 | 9.97  |
| INTU     | 3.238 | 0     |
| INVS     | 4.088 | 2.85  |
| IPMK     | 1.797 | 0.52  |
| IPO11    | 5.169 | 8.67  |
| IPO13    | 3.593 | 10.41 |
| IPO4     | 3.6   | 13.32 |
| IPO7     | 4.077 | 21.68 |
| IPO8     | 5.156 | 6.96  |
| IPO9     | 3.676 | 10.75 |
| IPP      | 3.053 | 0.41  |
| IPPK     | 4.401 | 1.55  |
| IPW      | 0.1   | 0     |
| IQCA     | 3.188 | 0     |
| IQCB1    | 2.766 | 6.79  |
| IQCC     | 2.017 | 1.71  |
| IQCD     | 1.35  | 0.37  |
| IQCE     | 6.032 | 0.96  |
| IQCF1    | 0.695 | 0     |
| IQCF2    | 0.587 | 0     |
| IQCF3    | 1.687 | 0     |
| IQCG     | 3.021 | 4.38  |
| IQCH     | 4.823 | 0.05  |
| IQCK     | 2.554 | 0.7   |
| IQGAP1   | 7.21  | 22.55 |
| IQGAP2   | 5.767 | 6.08  |
| IQGAP3   | 6.052 | 4.05  |
| IQSEC1   | 5.801 | 9.8   |
| IQSEC2   | 5.792 | 3.3   |
| IQSEC3   | 2.699 | 0.03  |
| IQUB     | 5.112 | 0     |
| IQWD1    | 3.293 | 6.85  |
| IRAK1    | 3.872 | 37.16 |
| IRAK1BP1 | 1.157 | 0.94  |
| IRAK2    | 3.469 | 1.24  |
| IRAK3    | 2.288 | 1.18  |
| IRAK4    | 2.813 | 3.71  |
| IREB2    | 4.405 | 6.92  |
| IRF1     | 2.526 | 69.6  |
| IRF2     | 2.224 | 31.33 |
| IRF2BP1  | 2.511 | 16.6  |
| IRF2BP2  | 3.675 | 77.15 |
| IRF3     | 1.595 | 51.34 |

|         |       |        |
|---------|-------|--------|
| IRF4    | 5.056 | 1.68   |
| IRF5    | 6.302 | 1.08   |
| IRF6    | 2.17  | 0      |
| IRF7    | 2.59  | 16.39  |
| IRF8    | 2.662 | 125.94 |
| IRGC    | 1.586 | 0      |
| IRGM    | 0.546 | 4.63   |
| IRGQ    | 2.21  | 2.13   |
| IRS1    | 5.8   | 2.01   |
| IRS2    | 6.998 | 2.81   |
| IRS3L   | 9.347 | 3.67   |
| IRS4    | 3.94  | 0.03   |
| IRX1    | 1.858 | 0      |
| IRX1P1  | 8.386 | 0      |
| IRX2    | 2.456 | 0      |
| IRX3    | 2.308 | 12.55  |
| IRX4    | 2.213 | 0      |
| IRX5    | 2.064 | 0.08   |
| IRX6    | 2.329 | 0      |
| ISCA1   | 2.004 | 6.64   |
| ISCA2   | 0.942 | 11.63  |
| ISCU    | 1.198 | 36.43  |
| ISG15   | 0.634 | 19.93  |
| ISG20   | 0.956 | 14.28  |
| ISG20L1 | 3.054 | 11.91  |
| ISG20L2 | 2.051 | 8.42   |
| ISGF3G  | 1.678 | 12.15  |
| ISL1    | 2.396 | 0      |
| ISL2    | 1.798 | 0.05   |
| ISLR    | 2.385 | 17.27  |
| ISLR2   | 4.184 | 0.24   |
| ISOC1   | 2.054 | 4.1    |
| ISOC2   | 1.122 | 21.24  |
| ISX     | 3.383 | 0      |
| ISY1    | 1.758 | 16.39  |
| ISYNA1  | 1.825 | 0.65   |
| ITCH    | 6.357 | 4.84   |
| ITFG1   | 2.234 | 12.25  |
| ITFG2   | 2.155 | 14.19  |
| ITFG3   | 2.921 | 18.29  |
| ITGA1   | 4.796 | 0.02   |
| ITGA10  | 5.17  | 0.46   |
| ITGA11  | 6.334 | 1.44   |
| ITGA2   | 5.349 | 0.39   |
| ITGA2B  | 3.334 | 0.13   |
| ITGA3   | 6.002 | 0.04   |
| ITGA4   | 6.362 | 26.9   |
| ITGA5   | 4.25  | 44.73  |
| ITGA6   | 5.578 | 168.62 |
| ITGA7   | 4.065 | 0.27   |

|          |        |        |
|----------|--------|--------|
| ITGA8    | 3.261  | 0      |
| ITGA9    | 3.962  | 1.47   |
| ITGAD    | 3.912  | 0.04   |
| ITGAE    | 4.132  | 2.2    |
| ITGAL    | 5.121  | 15.4   |
| ITGAM    | 4.742  | 1.28   |
| ITGAV    | 7.022  | 0.38   |
| ITGAX    | 4.649  | 0.16   |
| ITGB1    | 5.494  | 44.11  |
| ITGB1BP1 | 1.423  | 16.75  |
| ITGB1BP2 | 1.235  | 0.68   |
| ITGB1BP3 | 1.244  | 0      |
| ITGB2    | 2.868  | 84.32  |
| ITGB3    | 4.894  | 0      |
| ITGB3BP  | 0.879  | 6.52   |
| ITGB4    | 6.086  | 0.31   |
| ITGB4BP  | 2.074  | 46.95  |
| ITGB5    | 3.372  | 1.33   |
| ITGB6    | 2.397  | 0      |
| ITGB7    | 2.771  | 46.24  |
| ITGB8    | 17.553 | 0      |
| ITGBL1   | 2.494  | 0      |
| ITIH1    | 2.911  | 0      |
| ITIH2    | 3.189  | 0      |
| ITIH3    | 2.797  | 0.6    |
| ITIH4    | 3.26   | 1.09   |
| ITIH5    | 7.384  | 0.03   |
| ITIH5L   | 4.684  | 0      |
| ITK      | 4.366  | 0.06   |
| ITLN1    | 1.182  | 0      |
| ITLN2    | 1.15   | 0      |
| ITM2A    | 1.832  | 0.42   |
| ITM2B    | 1.859  | 145.59 |
| ITM2C    | 2.073  | 67.82  |
| ITPA     | 1.14   | 23.28  |
| ITPK1    | 3.197  | 10.01  |
| ITPKA    | 1.773  | 0.48   |
| ITPKB    | 5.858  | 4.36   |
| ITPKC    | 3.385  | 3.24   |
| ITPR1    | 9.505  | 6.2    |
| ITPR2    | 10.523 | 1.89   |
| ITPR3    | 8.834  | 5.76   |
| ITSN1    | 7.951  | 1.81   |
| ITSN2    | 7.594  | 4.64   |
| IVD      | 3.376  | 12.77  |
| IVL      | 2.135  | 0      |
| IVNS1ABP | 6.241  | 6.67   |
| IWS1     | 2.95   | 14.22  |
| IXL      | 3.567  | 12.24  |
| IYD      | 7.401  | 0      |

|         |       |        |
|---------|-------|--------|
| IZUMO1  | 1.621 | 0.15   |
| JAG1    | 5.881 | 0.04   |
| JAG2    | 5.077 | 1.71   |
| JAGN1   | 1.655 | 19.85  |
| JAK1    | 3.541 | 32.76  |
| JAK2    | 5.097 | 2.15   |
| JAK3    | 4.025 | 6.09   |
| JAKMIP1 | 2.549 | 0.03   |
| JAKMIP2 | 3.338 | 0      |
| JAM2    | 1.693 | 0      |
| JAM3    | 3.667 | 0.53   |
| JARID1A | 6.457 | 7.38   |
| JARID1B | 6.383 | 6.97   |
| JARID1C | 5.912 | 20.46  |
| JARID1D | 5.487 | 12.62  |
| JARID2  | 5.756 | 5.58   |
| JAZF1   | 6.4   | 0.43   |
| JDP2    | 1.696 | 26.72  |
| JMJD1A  | 4.718 | 7.32   |
| JMJD1B  | 6.813 | 13.49  |
| JMJD1C  | 8.396 | 6.66   |
| JMJD2A  | 4.417 | 16     |
| JMJD2B  | 5.593 | 21.55  |
| JMJD2C  | 4.227 | 6.18   |
| JMJD2D  | 2.974 | 0.76   |
| JMJD3   | 6.704 | 4.21   |
| JMJD4   | 2.55  | 12.06  |
| JMJD5   | 2.416 | 2.09   |
| JMJD6   | 1.848 | 9.53   |
| JMY     | 2.677 | 2.07   |
| JOSD1   | 3.504 | 17.89  |
| JOSD2   | 0.769 | 10.3   |
| JOSD3   | 2.286 | 13.75  |
| JPH1    | 4.373 | 0.75   |
| JPH2    | 5.941 | 1.21   |
| JPH3    | 3.997 | 0.06   |
| JPH4    | 4.386 | 6.63   |
| JRK     | 3.98  | 1.29   |
| JRKL    | 2.914 | 2.63   |
| JSRP1   | 1.107 | 0.08   |
| JTB     | 1.574 | 46.67  |
| JTV1    | 2.943 | 8.87   |
| JUB     | 4.946 | 1.27   |
| JUN     | 3.323 | 46.11  |
| JUNB    | 1.816 | 29.5   |
| JUND    | 1.899 | 190.96 |
| JUP     | 4.323 | 138.69 |
| KAAG1   | 1.382 | 0      |
| KAL1    | 6.314 | 0.03   |
| KALP    | 0.184 | 0      |



|         |        |       |
|---------|--------|-------|
| KALRN   | 12.55  | 0.51  |
| KARCA1  | 2.485  | 0.27  |
| KARS    | 1.997  | 68.37 |
| KATNA1  | 1.521  | 6.65  |
| KATNAL1 | 7.601  | 1.68  |
| KATNAL2 | 1.882  | 1.25  |
| KATNB1  | 2.646  | 12    |
| KAZALD1 | 3.398  | 11.38 |
| KBTBD10 | 2.464  | 0.03  |
| KBTBD11 | 6.71   | 1.1   |
| KBTBD2  | 7.216  | 4.6   |
| KBTBD3  | 3.952  | 0.11  |
| KBTBD4  | 3.436  | 19.64 |
| KBTBD5  | 2.419  | 0     |
| KBTBD6  | 5.228  | 0.69  |
| KBTBD7  | 2.992  | 0.9   |
| KBTBD8  | 4.617  | 0.42  |
| KC6     | 1.713  | 0     |
| KCMF1   | 2.39   | 12.97 |
| KCNA1   | 1.488  | 0     |
| KCNA10  | 1.959  | 0     |
| KCNA2   | 2.125  | 0     |
| KCNA3   | 3.346  | 0.08  |
| KCNA4   | 3.613  | 0     |
| KCNA5   | 3.693  | 38.52 |
| KCNA6   | 4.237  | 0.35  |
| KCNA7   | 4.372  | 0     |
| KCNAB1  | 6.73   | 0.05  |
| KCNAB2  | 3.89   | 19.71 |
| KCNAB3  | 1.608  | 0.31  |
| KCNB1   | 3.756  | 0     |
| KCNB2   | 3.582  | 0     |
| KCNC1   | 1.546  | 0     |
| KCNC2   | 3.654  | 0     |
| KCNC3   | 3.99   | 2.6   |
| KCNC4   | 5.954  | 0.42  |
| KCND1   | 4.72   | 0.99  |
| KCND2   | 10.666 | 0     |
| KCND3   | 2.693  | 0     |
| KCNE1   | 3.57   | 0     |
| KCNE1L  | 1.465  | 0.17  |
| KCNE2   | 0.803  | 0.42  |
| KCNE3   | 2.519  | 13.31 |
| KCNE4   | 1.17   | 0     |
| KCNF1   | 2.289  | 0.03  |
| KCNG1   | 4.096  | 0     |
| KCNG2   | 1.401  | 4.15  |
| KCNG3   | 4.456  | 0     |
| KCNG4   | 3.759  | 0     |
| KCNH1   | 3.601  | 0     |

|         |        |       |
|---------|--------|-------|
| KCNH2   | 10.67  | 0.43  |
| KCNH3   | 3.853  | 0.04  |
| KCNH4   | 3.92   | 0     |
| KCNH5   | 5.196  | 0     |
| KCNH6   | 3.881  | 0.03  |
| KCNH7   | 4.514  | 0     |
| KCNH8   | 5.063  | 0     |
| KCNIP1  | 2.127  | 7.37  |
| KCNIP2  | 4.472  | 0.15  |
| KCNIP3  | 3.017  | 0     |
| KCNIP4  | 2.925  | 0     |
| KCNJ1   | 4.109  | 0     |
| KCNJ10  | 4.44   | 0.08  |
| KCNJ11  | 3.412  | 0     |
| KCNJ12  | 1.796  | 0.42  |
| KCNJ13  | 2.947  | 0     |
| KCNJ14  | 3.525  | 0.62  |
| KCNJ15  | 3.156  | 0.03  |
| KCNJ16  | 4.409  | 0.02  |
| KCNJ2   | 5.388  | 0     |
| KCNJ3   | 2.89   | 0     |
| KCNJ4   | 2.121  | 0.31  |
| KCNJ5   | 2.912  | 0.03  |
| KCNJ6   | 3.739  | 3.83  |
| KCNJ8   | 2.381  | 0.1   |
| KCNJ9   | 3.029  | 0     |
| KCNK1   | 1.887  | 0     |
| KCNK10  | 3.139  | 0.03  |
| KCNK12  | 2.05   | 46.59 |
| KCNK13  | 2.517  | 0     |
| KCNK15  | 1.246  | 0     |
| KCNK16  | 1.226  | 0     |
| KCNK17  | 1.52   | 0.28  |
| KCNK18  | 1.155  | 0     |
| KCNK2   | 3.695  | 0     |
| KCNK3   | 2.592  | 1.59  |
| KCNK4   | 1.81   | 0     |
| KCNK5   | 3.783  | 0.07  |
| KCNK6   | 2.662  | 1.67  |
| KCNK7   | 3.346  | 0.03  |
| KCNK9   | 1.303  | 0     |
| KCNMA1  | 14.632 | 0.04  |
| KCNMB1  | 1.517  | 5.11  |
| KCNMB2  | 2.775  | 0     |
| KCNMB3  | 3.904  | 0.86  |
| KCNMB3L | 1.94   | 0.22  |
| KCNMB4  | 1.631  | 0.2   |
| KCNN1   | 2.657  | 0.13  |
| KCNN2   | 3.057  | 0     |
| KCNN3   | 5.946  | 12.68 |

|          |       |       |
|----------|-------|-------|
| KCNN4    | 2.24  | 11.43 |
| KCNQ1    | 3.762 | 0.04  |
| KCNQ1DN  | 1.093 | 0     |
| KCNQ1OT1 | 0.592 | 0     |
| KCNQ2    | 4.169 | 0     |
| KCNQ3    | 3.097 | 0.16  |
| KCNQ4    | 2.335 | 0.03  |
| KCNQ5    | 3.325 | 0     |
| KCNRG    | 2.334 | 0.58  |
| KCNS1    | 4.539 | 0.02  |
| KCNS2    | 3.168 | 0     |
| KCNS3    | 2.33  | 6.36  |
| KCNT1    | 4.823 | 0.03  |
| KCNT2    | 5.909 | 0     |
| KCNV1    | 2.929 | 0     |
| KCNV2    | 1.882 | 0.04  |
| KCTD1    | 1.747 | 0.97  |
| KCTD10   | 3.97  | 9.93  |
| KCTD11   | 2.78  | 0.94  |
| KCTD12   | 6.214 | 0.53  |
| KCTD13   | 1.711 | 11.57 |
| KCTD14   | 1.637 | 0.05  |
| KCTD15   | 3.53  | 3.94  |
| KCTD16   | 5.183 | 0     |
| KCTD17   | 1.854 | 7.45  |
| KCTD18   | 2.94  | 6.79  |
| KCTD2    | 3.698 | 5.97  |
| KCTD20   | 5.018 | 13.66 |
| KCTD21   | 3.381 | 1.27  |
| KCTD3    | 3.931 | 14.17 |
| KCTD4    | 1.865 | 0     |
| KCTD5    | 2.46  | 21.78 |
| KCTD6    | 1.825 | 1.34  |
| KCTD7    | 5.15  | 1.42  |
| KCTD8    | 2.24  | 0     |
| KCTD9    | 3.338 | 1.31  |
| KDELC1   | 2.06  | 1.51  |
| KDELC2   | 4.255 | 2.91  |
| KDELR1   | 1.557 | 73.79 |
| KDELR2   | 2.306 | 24.73 |
| KDELR3   | 2.127 | 4.63  |
| KDR      | 5.832 | 0.02  |
| KEAP1    | 2.701 | 28.6  |
| KEL      | 5.095 | 0.4   |
| KERA     | 2.533 | 0     |
| KGFLP1   | 1.89  | 0.04  |
| KGFLP2   | 3.666 | 0.02  |
| KHDRBS1  | 2.685 | 47.03 |
| KHDRBS2  | 2.332 | 0     |
| KHDRBS3  | 1.957 | 67.11 |

|           |        |       |
|-----------|--------|-------|
| KHK       | 2.027  | 0.71  |
| KHSRP     | 4.009  | 61.69 |
| KIAA0020  | 2.112  | 8.62  |
| KIAA0040  | 4.564  | 12.29 |
| KIAA0082  | 4.018  | 13.48 |
| KIAA0090  | 4.238  | 10.32 |
| KIAA0100  | 7.431  | 35.04 |
| KIAA0101  | 2.586  | 3.85  |
| KIAA0125  | 7.899  | 0.01  |
| KIAA0133  | 5.613  | 2.18  |
| KIAA0141  | 3.039  | 15.99 |
| KIAA0143  | 5.132  | 4.86  |
| KIAA0146  | 3.22   | 7.04  |
| KIAA0152  | 6.349  | 20.55 |
| KIAA0157  | 2.951  | 4.31  |
| KIAA0174  | 2.349  | 49.35 |
| KIAA0179  | 5.087  | 11.01 |
| KIAA0182  | 7.395  | 2.01  |
| KIAA0195  | 4.985  | 17.25 |
| KIAA0196  | 3.911  | 7.54  |
| KIAA0226  | 7.009  | 5.66  |
| KIAA0232  | 7.84   | 2.32  |
| KIAA0240  | 6.515  | 2.98  |
| KIAA0241  | 4.88   | 1.84  |
| KIAA0247  | 5.39   | 8.81  |
| KIAA0251  | 4.495  | 9.5   |
| KIAA0256  | 6.779  | 4.03  |
| KIAA0258  | 1.296  | 4.22  |
| KIAA0265  | 8.942  | 1.24  |
| KIAA0274  | 3.061  | 3.42  |
| KIAA0284  | 6.549  | 0.15  |
| KIAA0286  | 5.37   | 3.5   |
| KIAA0310  | 9.036  | 10.87 |
| KIAA0317  | 5.445  | 7.03  |
| KIAA0319  | 6.805  | 0     |
| KIAA0319L | 7.376  | 4.13  |
| KIAA0323  | 6.479  | 14.45 |
| KIAA0329  | 8.607  | 1.12  |
| KIAA0350  | 6.786  | 6.42  |
| KIAA0355  | 6.622  | 1.56  |
| KIAA0363  | 10.771 | 0.05  |
| KIAA0367  | 11.705 | 2.35  |
| KIAA0368  | 7.391  | 8.01  |
| KIAA0372  | 5.164  | 11.07 |
| KIAA0391  | 2.611  | 10.22 |
| KIAA0404  | 6.299  | 6.31  |
| KIAA0406  | 3.914  | 7.51  |
| KIAA0408  | 6.449  | 0     |
| KIAA0409  | 1.674  | 11.17 |
| KIAA0415  | 5.78   | 6.73  |

|          |        |       |
|----------|--------|-------|
| KIAA0423 | 6.242  | 1.22  |
| KIAA0427 | 5.736  | 3.27  |
| KIAA0430 | 7.728  | 8.12  |
| KIAA0460 | 5.526  | 12.35 |
| KIAA0467 | 10.217 | 4.29  |
| KIAA0492 | 6.259  | 0.07  |
| KIAA0494 | 5.765  | 12.64 |
| KIAA0495 | 4.033  | 1.74  |
| KIAA0513 | 7.361  | 3.6   |
| KIAA0523 | 5.821  | 0     |
| KIAA0528 | 4.408  | 3.02  |
| KIAA0556 | 6.618  | 1.84  |
| KIAA0562 | 5.846  | 4.67  |
| KIAA0586 | 4.966  | 3.17  |
| KIAA0644 | 9.917  | 0.24  |
| KIAA0649 | 4.932  | 0     |
| KIAA0652 | 4.012  | 16.23 |
| KIAA0664 | 5.224  | 11.91 |
| KIAA0672 | 4.228  | 0.88  |
| KIAA0692 | 4.064  | 22.2  |
| KIAA0701 | 5.437  | 1.27  |
| KIAA0737 | 4.524  | 18.55 |
| KIAA0738 | 8.152  | 1.29  |
| KIAA0746 | 4.383  | 85.68 |
| KIAA0748 | 3.673  | 5.41  |
| KIAA0753 | 4.424  | 2.17  |
| KIAA0754 | 6.171  | 0.56  |
| KIAA0773 | 18.486 | 0     |
| KIAA0774 | 6.327  | 5.63  |
| KIAA0776 | 4.191  | 3.52  |
| KIAA0789 | 4.636  | 0     |
| KIAA0802 | 5.771  | 4.75  |
| KIAA0828 | 10.386 | 4.15  |
| KIAA0831 | 4.742  | 1.88  |
| KIAA0841 | 4.004  | 10.1  |
| KIAA0859 | 4.834  | 10.55 |
| KIAA0892 | 4.146  | 13.55 |
| KIAA0895 | 8.31   | 0.01  |
| KIAA0907 | 2.945  | 7.67  |
| KIAA0913 | 4.248  | 20.05 |
| KIAA0922 | 4.966  | 4.21  |
| KIAA0947 | 8.577  | 3.77  |
| KIAA0953 | 4.218  | 0.04  |
| KIAA0984 | 8.019  | 0.06  |
| KIAA0999 | 6.069  | 5.4   |
| KIAA1005 | 5.297  | 0.67  |
| KIAA1009 | 5.051  | 1.05  |
| KIAA1012 | 5.465  | 5.64  |
| KIAA1024 | 6.717  | 0.03  |
| KIAA1026 | 2.891  | 0.38  |

|           |        |       |
|-----------|--------|-------|
| KIAA1033  | 5.808  | 6.34  |
| KIAA1045  | 6.191  | 0     |
| KIAA1086  | 4.768  | 0     |
| KIAA1109  | 15.575 | 1.58  |
| KIAA1128  | 7.676  | 2.91  |
| KIAA1143  | 0.832  | 4.05  |
| KIAA1147  | 14.592 | 3.29  |
| KIAA1155  | 6.208  | 0.49  |
| KIAA1161  | 4.171  | 0.1   |
| KIAA1166  | 2.156  | 11.1  |
| KIAA1189  | 4.21   | 0.06  |
| KIAA1191  | 2.786  | 14.06 |
| KIAA1199  | 7.08   | 0.57  |
| KIAA1212  | 9.638  | 4.12  |
| KIAA1217  | 7.381  | 0.06  |
| KIAA1219  | 8.636  | 3.92  |
| KIAA1239  | 7.477  | 0     |
| KIAA1244  | 8.658  | 0     |
| KIAA1257  | 6.094  | 0     |
| KIAA1267  | 4.965  | 13.93 |
| KIAA1274  | 4.568  | 25.96 |
| KIAA1276  | 4.236  | 0.6   |
| KIAA1279  | 2.528  | 1.96  |
| KIAA1303  | 10.237 | 17.11 |
| KIAA1305  | 7.857  | 4.59  |
| KIAA1324  | 3.398  | 0.05  |
| KIAA1324L | 6.56   | 0.02  |
| KIAA1328  | 4.854  | 0.92  |
| KIAA1333  | 5.533  | 0.7   |
| KIAA1344  | 4.552  | 1     |
| KIAA1345  | 4.89   | 0.17  |
| KIAA1370  | 3.863  | 2.79  |
| KIAA1377  | 7.033  | 0     |
| KIAA1383  | 5.455  | 2.23  |
| KIAA1394  | 5.067  | 0.43  |
| KIAA1407  | 3.976  | 0.68  |
| KIAA1409  | 8.471  | 0.03  |
| KIAA1411  | 5.282  | 0.88  |
| KIAA1429  | 6.538  | 7.32  |
| KIAA1430  | 3.379  | 4.69  |
| KIAA1432  | 4.307  | 6.55  |
| KIAA1446  | 2.673  | 0     |
| KIAA1456  | 5.752  | 0     |
| KIAA1462  | 13.553 | 1.9   |
| KIAA1467  | 4.711  | 3.42  |
| KIAA1468  | 3.396  | 2.35  |
| KIAA1486  | 4.828  | 0     |
| KIAA1505  | 6.666  | 0.16  |
| KIAA1509  | 7.497  | 6.59  |
| KIAA1522  | 5.294  | 1.26  |

|           |        |       |
|-----------|--------|-------|
| KIAA1524  | 3.378  | 1.6   |
| KIAA1529  | 6.269  | 0.02  |
| KIAA1530  | 4.56   | 2.25  |
| KIAA1539  | 3.028  | 4.9   |
| KIAA1542  | 5.521  | 10.57 |
| KIAA1543  | 4.084  | 0.04  |
| KIAA1545  | 4.471  | 18.64 |
| KIAA1546  | 9.233  | 0.52  |
| KIAA1549  | 13.602 | 0.03  |
| KIAA1553  | 6.01   | 0.7   |
| KIAA1571  | 10.162 | 0     |
| KIAA1576  | 3.769  | 2.69  |
| KIAA1586  | 2.868  | 1.2   |
| KIAA1598  | 3.415  | 0     |
| KIAA1600  | 5.321  | 2.72  |
| KIAA1604  | 3.145  | 4.74  |
| KIAA1609  | 3.895  | 1.84  |
| KIAA1614  | 6.999  | 0.17  |
| KIAA1618  | 5.318  | 2.64  |
| KIAA1622  | 4.322  | 0     |
| KIAA1627  | 2.12   | 3.49  |
| KIAA1632  | 12.698 | 2.44  |
| KIAA1639  | 5.337  | 0.31  |
| KIAA1641  | 2.405  | 0.91  |
| KIAA1644  | 6.741  | 0     |
| KIAA1666  | 6.105  | 0.06  |
| KIAA1683  | 3.757  | 1.75  |
| KIAA1688  | 5.146  | 0.02  |
| KIAA1704  | 1.574  | 7.55  |
| KIAA1706  | 9.374  | 0.96  |
| KIAA1712  | 4.503  | 0.95  |
| KIAA1715  | 5.765  | 2.19  |
| KIAA1718  | 18.356 | 0.52  |
| KIAA1727  | 6.47   | 0.17  |
| KIAA1729  | 6.936  | 1.37  |
| KIAA1737  | 4.348  | 3.66  |
| KIAA1751  | 4.71   | 0     |
| KIAA1754  | 4.364  | 8.11  |
| KIAA1754L | 4.213  | 2.58  |
| KIAA1772  | 4.949  | 0     |
| KIAA1787  | 5.357  | 6.86  |
| KIAA1794  | 4.72   | 9.23  |
| KIAA1797  | 6.095  | 0.54  |
| KIAA1799  | 2.106  | 4.08  |
| KIAA1804  | 4.666  | 0     |
| KIAA1815  | 5.341  | 4.26  |
| KIAA1822  | 2.238  | 0     |
| KIAA1822L | 2.504  | 0.03  |
| KIAA1826  | 4.087  | 1.44  |
| KIAA1833  | 3.808  | 0.6   |

|           |        |       |
|-----------|--------|-------|
| KIAA1840  | 7.788  | 7.37  |
| KIAA1841  | 3.116  | 0.71  |
| KIAA1853  | 8.382  | 0     |
| KIAA1856  | 10.622 | 2.29  |
| KIAA1875  | 5.187  | 0.32  |
| KIAA1881  | 6.353  | 0.08  |
| KIAA1909  | 11.507 | 0.9   |
| KIAA1913  | 5.023  | 1.33  |
| KIAA1919  | 2.079  | 1.38  |
| KIAA1920  | 8.555  | 0     |
| KIAA1922  | 1.248  | 1.49  |
| KIAA1946  | 3.557  | 0.28  |
| KIAA1949  | 10.736 | 1.63  |
| KIAA1957  | 3.24   | 0.15  |
| KIAA1958  | 2.683  | 0.82  |
| KIAA1967  | 4.079  | 31.51 |
| KIAA1975  | 3.182  | 0     |
| KIAA1984  | 1.704  | 1.09  |
| KIAA2002  | 11.249 | 1.35  |
| KIAA2013  | 2.632  | 24.48 |
| KIAA2018  | 8.636  | 2.12  |
| KIAA2026  | 4.673  | 3.82  |
| KIDINS220 | 7.263  | 9.21  |
| KIF11     | 4.91   | 6.6   |
| KIF12     | 2.003  | 0     |
| KIF13A    | 5.852  | 0.02  |
| KIF13B    | 10.203 | 3.73  |
| KIF14     | 6.595  | 1.2   |
| KIF15     | 4.758  | 3.17  |
| KIF17     | 3.969  | 0.61  |
| KIF18A    | 3.361  | 1.35  |
| KIF19     | 2.094  | 0.12  |
| KIF1A     | 8.816  | 0.02  |
| KIF1B     | 14.126 | 1.61  |
| KIF1C     | 4.188  | 10.66 |
| KIF20A    | 2.961  | 8.7   |
| KIF21A    | 6.328  | 0.09  |
| KIF21B    | 9.895  | 0.82  |
| KIF22     | 2.096  | 19.81 |
| KIF23     | 3.618  | 4.91  |
| KIF25     | 1.51   | 0     |
| KIF26A    | 7.237  | 3.06  |
| KIF26B    | 8.365  | 0     |
| KIF27     | 4.653  | 0.56  |
| KIF2A     | 2.872  | 6.92  |
| KIF2B     | 2.312  | 0     |
| KIF2C     | 2.797  | 11.32 |
| KIF3A     | 6.257  | 0.95  |
| KIF3B     | 6.103  | 2.74  |
| KIF3C     | 5.379  | 11.18 |



|          |        |       |
|----------|--------|-------|
| KIF4A    | 4.348  | 4.03  |
| KIF5A    | 3.897  | 0     |
| KIF5B    | 4.27   | 12.78 |
| KIF5C    | 0.704  | 0     |
| KIF6     | 2.917  | 0     |
| KIF7     | 3.121  | 1.19  |
| KIF9     | 3.403  | 1.85  |
| KIFAP3   | 2.997  | 5.37  |
| KIFC1    | 4.708  | 11.4  |
| KIFC2    | 3.248  | 2.96  |
| KIFC3    | 3.366  | 8.48  |
| KIN      | 1.906  | 2.57  |
| KIR2DL1  | 1.583  | 0     |
| KIR2DL2  | 1.572  | 0     |
| KIR2DL3  | 1.896  | 0     |
| KIR2DL4  | 1.581  | 0     |
| KIR2DL5A | 1.596  | 0     |
| KIR2DL5B | 1.632  | 0     |
| KIR2DP1  | 4.557  | 0     |
| KIR2DS1  | 1.101  | 0     |
| KIR2DS2  | 1.557  | 0     |
| KIR2DS3  | 1.113  | 0     |
| KIR2DS4  | 2.246  | 0     |
| KIR2DS5  | 1.457  | 0     |
| KIR3DL1  | 1.861  | 0.14  |
| KIR3DL2  | 1.854  | 0     |
| KIR3DL3  | 1.691  | 0     |
| KIR3DP1  | 0.1    | 0     |
| KIR3DX1  | 11.432 | 0.01  |
| KIRREL   | 5.229  | 6.4   |
| KIRREL2  | 3.133  | 0.21  |
| KIRREL3  | 2.495  | 0     |
| KISS1    | 0.709  | 0     |
| KISS1R   | 1.607  | 0     |
| KIT      | 5.084  | 0.05  |
| KITLG    | 5.435  | 0     |
| KL       | 8.714  | 0     |
| KLB      | 3.279  | 0     |
| KLC1     | 4.644  | 15.94 |
| KLC2     | 2.916  | 8.15  |
| KLC3     | 1.793  | 1.41  |
| KLC4     | 3.555  | 7.01  |
| KLF1     | 1.615  | 3.08  |
| KLF10    | 4.575  | 35.46 |
| KLF11    | 4.03   | 5.17  |
| KLF12    | 11.614 | 0.68  |
| KLF13    | 6.8    | 19.25 |
| KLF14    | 2.767  | 0     |
| KLF15    | 2.525  | 0.24  |
| KLF16    | 2.887  | 21.51 |

|         |       |       |
|---------|-------|-------|
| KLF17   | 3.131 | 0     |
| KLF2    | 1.996 | 85.04 |
| KLF3    | 3.083 | 7.21  |
| KLF4    | 2.639 | 13.98 |
| KLF5    | 3.35  | 0.28  |
| KLF6    | 4.43  | 87.62 |
| KLF7    | 1.639 | 2.82  |
| KLF8    | 2.544 | 0.89  |
| KLF9    | 5.208 | 4.89  |
| KLHDC1  | 2.627 | 0.48  |
| KLHDC2  | 1.806 | 16.32 |
| KLHDC3  | 1.879 | 75.36 |
| KLHDC4  | 1.874 | 10.15 |
| KLHDC5  | 6.469 | 3.25  |
| KLHDC6  | 4.121 | 0     |
| KLHDC7A | 2.434 | 0     |
| KLHDC7B | 2.082 | 0.08  |
| KLHDC8A | 2.5   | 0.03  |
| KLHDC8B | 1.935 | 1.27  |
| KLHL1   | 3.984 | 0     |
| KLHL10  | 1.969 | 0.13  |
| KLHL11  | 2.326 | 0.69  |
| KLHL12  | 3.338 | 7.59  |
| KLHL13  | 3.125 | 0     |
| KLHL14  | 4.261 | 0.08  |
| KLHL15  | 2.146 | 2.67  |
| KLHL17  | 2.56  | 1.22  |
| KLHL18  | 4.616 | 3.5   |
| KLHL2   | 3.11  | 13.92 |
| KLHL20  | 3.464 | 3.72  |
| KLHL21  | 4.487 | 5.65  |
| KLHL22  | 2.568 | 11.02 |
| KLHL23  | 2.211 | 0.69  |
| KLHL24  | 7.331 | 2.36  |
| KLHL25  | 3.518 | 3.54  |
| KLHL26  | 3.122 | 1.38  |
| KLHL28  | 2.028 | 1.41  |
| KLHL29  | 5.047 | 0.17  |
| KLHL3   | 6.49  | 1.31  |
| KLHL30  | 3.557 | 0     |
| KLHL31  | 1.905 | 0     |
| KLHL32  | 3.329 | 0     |
| KLHL34  | 2.84  | 0.03  |
| KLHL4   | 6.029 | 0     |
| KLHL5   | 4.021 | 4.19  |
| KLHL6   | 5.453 | 9.1   |
| KLHL7   | 9.232 | 0.56  |
| KLHL8   | 4.576 | 3.13  |
| KLHL9   | 4.352 | 3.04  |
| KLK1    | 0.874 | 6.94  |

|         |        |       |
|---------|--------|-------|
| KLK10   | 1.661  | 0     |
| KLK11   | 1.441  | 0     |
| KLK12   | 1.677  | 0     |
| KLK13   | 1.258  | 0     |
| KLK14   | 1.133  | 0     |
| KLK15   | 2.932  | 0     |
| KLK2    | 7.498  | 0.2   |
| KLK3    | 3.489  | 0     |
| KLK4    | 1.347  | 0.06  |
| KLK5    | 1.495  | 0     |
| KLK6    | 2.542  | 0     |
| KLK7    | 1.971  | 0     |
| KLK8    | 1.515  | 0     |
| KLK9    | 1.438  | 0     |
| KLKB1   | 2.247  | 0     |
| Klkb14  | 1.81   | 0     |
| KLKP1   | 15.428 | 0     |
| KLRA1   | 1.243  | 0.61  |
| KLRB1   | 0.74   | 2.28  |
| KLRC1   | 1.515  | 0.17  |
| KLRC2   | 1.221  | 0     |
| KLRC3   | 1.236  | 0.07  |
| KLRC4   | 0.965  | 0     |
| KLRD1   | 1.368  | 0     |
| KLRF1   | 1.242  | 0.27  |
| KLRG1   | 1.791  | 0.33  |
| KLRG2   | 3.088  | 0.27  |
| KLRK1   | 1.75   | 0.58  |
| KMO     | 4.987  | 1.11  |
| KNDC1   | 7.122  | 0.16  |
| KNG1    | 1.665  | 0     |
| KNTC1   | 6.965  | 2.15  |
| KPNA1   | 6.887  | 5.88  |
| KPNA2   | 1.98   | 15.57 |
| KPNA3   | 4.456  | 4.54  |
| KPNA4   | 4.049  | 9.26  |
| KPNA5   | 2.158  | 0.54  |
| KPNA6   | 5.06   | 8.23  |
| KPNB1   | 4.505  | 50.81 |
| KPRP    | 2.523  | 0     |
| KPTN    | 1.64   | 14.54 |
| KRAS    | 10.087 | 1.94  |
| KRBA1   | 8.035  | 1.49  |
| KRBA2   | 1.964  | 2.75  |
| KRCC1   | 1.753  | 8.89  |
| KREMEN1 | 6.562  | 0.27  |
| KREMEN2 | 2.625  | 0.2   |
| KRIT1   | 12.456 | 0.73  |
| KRR1    | 3.329  | 5.46  |
| KRT1    | 2.507  | 0.17  |

|          |        |       |
|----------|--------|-------|
| KRT10    | 2.124  | 10.11 |
| KRT12    | 1.867  | 0     |
| KRT121P  | 9.724  | 0     |
| KRT122P  | 4.517  | 0.02  |
| KRT123P  | 13.267 | 0     |
| KRT124P  | 5.18   | 0     |
| KRT126P  | 1.371  | 0     |
| KRT13    | 2.097  | 0.08  |
| KRT14    | 1.634  | 0     |
| KRT15    | 1.709  | 0     |
| KRT16    | 1.658  | 0     |
| KRT17    | 1.499  | 0.06  |
| KRT18    | 1.536  | 0.16  |
| KRT18L1  | 1.411  | 0     |
| KRT18P1  | 3.819  | 0     |
| KRT18P10 | 1.393  | 0     |
| KRT18P3  | 1.291  | 0     |
| KRT19    | 1.464  | 0     |
| KRT2     | 2.414  | 0     |
| KRT20    | 1.737  | 0     |
| KRT222P  | 1.048  | 0     |
| KRT223P  | 5.694  | 0     |
| KRT23    | 2.147  | 0     |
| KRT24    | 1.881  | 0     |
| KRT25    | 1.651  | 0.15  |
| KRT26    | 1.73   | 0     |
| KRT27    | 1.612  | 5.33  |
| KRT28    | 1.628  | 0.31  |
| KRT3     | 2.232  | 0     |
| KRT31    | 1.596  | 0     |
| KRT32    | 1.708  | 0     |
| KRT33A   | 1.252  | 0     |
| KRT33B   | 1.602  | 0     |
| KRT34    | 1.713  | 0     |
| KRT35    | 1.671  | 0     |
| KRT36    | 1.644  | 0     |
| KRT37    | 1.718  | 0     |
| KRT38    | 2.837  | 0     |
| KRT39    | 1.696  | 0     |
| KRT4     | 2.575  | 0     |
| KRT40    | 2.112  | 0     |
| KRT41P   | 6.661  | 0     |
| KRT42P   | 0.563  | 0     |
| KRT5     | 2.301  | 0     |
| KRT6A    | 2.27   | 0     |
| KRT6B    | 2.217  | 0     |
| KRT6C    | 1.984  | 0     |
| KRT6L    | 2.066  | 0     |
| KRT7     | 1.702  | 0.05  |
| KRT71    | 2.237  | 0     |

|            |       |      |
|------------|-------|------|
| KRT72      | 1.985 | 0    |
| KRT73      | 2.284 | 0    |
| KRT74      | 2.788 | 0    |
| KRT75      | 2.121 | 0    |
| KRT76      | 2.505 | 0    |
| KRT77      | 3.072 | 0    |
| KRT78      | 1.778 | 0    |
| KRT8       | 1.788 | 0.38 |
| KRT80      | 3.39  | 0.03 |
| KRT81      | 1.91  | 0    |
| KRT82      | 2.681 | 0    |
| KRT83      | 1.864 | 0    |
| KRT84      | 2.073 | 0    |
| KRT85      | 2.491 | 0    |
| KRT86      | 2.091 | 0.04 |
| KRT8L1     | 1.5   | 0    |
| KRT8L2     | 1.689 | 3.49 |
| KRT9       | 2.287 | 0    |
| KRTAP10-1  | 1.011 | 0    |
| KRTAP10-10 | 1.1   | 0    |
| KRTAP10-11 | 1.007 | 0    |
| KRTAP10-12 | 0.873 | 0    |
| KRTAP10-2  | 1.071 | 0    |
| KRTAP10-3  | 0.738 | 0    |
| KRTAP10-4  | 1.382 | 0    |
| KRTAP10-5  | 0.918 | 0    |
| KRTAP10-6  | 1.238 | 0    |
| KRTAP10-7  | 1.183 | 0    |
| KRTAP10-8  | 0.876 | 0    |
| KRTAP10-9  | 1.179 | 0    |
| KRTAP1-1   | 0.903 | 0    |
| KRTAP11-1  | 0.912 | 0    |
| KRTAP12-1  | 0.588 | 0    |
| KRTAP12-2  | 0.739 | 0    |
| KRTAP12-3  | 0.41  | 0    |
| KRTAP12-4  | 0.447 | 0    |
| KRTAP1-3   | 0.972 | 0    |
| KRTAP13-1  | 0.582 | 0    |
| KRTAP13-2  | 0.823 | 0    |
| KRTAP13-3  | 0.52  | 0    |
| KRTAP13-4  | 0.483 | 0    |
| KRTAP13P1  | 0.3   | 0    |
| KRTAP13P2  | 0.101 | 0    |
| KRTAP1-5   | 1.177 | 0    |
| KRTAP15-1  | 0.453 | 0    |
| KRTAP17-1  | 0.779 | 0    |
| KRTAP19-1  | 0.273 | 0    |
| KRTAP19-2  | 0.159 | 0    |
| KRTAP19-3  | 0.494 | 0    |
| KRTAP19-4  | 0.255 | 0    |

|           |       |   |
|-----------|-------|---|
| KRTAP19-5 | 0.219 | 0 |
| KRTAP19-6 | 0.33  | 0 |
| KRTAP19-7 | 0.192 | 0 |
| KRTAP19-8 | 0.318 | 0 |
| KRTAP19P1 | 0.203 | 0 |
| KRTAP19P2 | 0.252 | 0 |
| KRTAP19P3 | 0.231 | 0 |
| KRTAP19P4 | 0.135 | 0 |
| KRTAP20-1 | 0.171 | 0 |
| KRTAP20-2 | 0.198 | 0 |
| KRTAP2-1  | 0.791 | 0 |
| KRTAP21-1 | 0.24  | 0 |
| KRTAP21-2 | 0.252 | 0 |
| KRTAP2-2  | 0.883 | 0 |
| KRTAP22-1 | 0.147 | 0 |
| KRTAP23-1 | 0.208 | 0 |
| KRTAP2-4  | 0.764 | 0 |
| KRTAP24-1 | 0.765 | 0 |
| KRTAP26-1 | 1.159 | 0 |
| KRTAP27-1 | 0.624 | 0 |
| KRTAP2P1  | 0.401 | 0 |
| KRTAP3-1  | 0.594 | 0 |
| KRTAP3-2  | 0.694 | 0 |
| KRTAP3-3  | 0.704 | 0 |
| KRTAP3P1  | 0.24  | 0 |
| KRTAP4-10 | 0.739 | 0 |
| KRTAP4-12 | 1.077 | 0 |
| KRTAP4-14 | 1.18  | 0 |
| KRTAP4-15 | 1.209 | 0 |
| KRTAP4-2  | 0.763 | 0 |
| KRTAP4-3  | 0.942 | 0 |
| KRTAP4-4  | 1.079 | 0 |
| KRTAP4-5  | 0.879 | 0 |
| KRTAP4-7  | 1.149 | 0 |
| KRTAP4-8  | 1.134 | 0 |
| KRTAP4P1  | 0.708 | 0 |
| KRTAP5-1  | 0.942 | 0 |
| KRTAP5-10 | 1.058 | 0 |
| KRTAP5-11 | 0.882 | 0 |
| KRTAP5-2  | 1.118 | 0 |
| KRTAP5-3  | 0.899 | 0 |
| KRTAP5-4  | 0.927 | 0 |
| KRTAP5-6  | 0.561 | 0 |
| KRTAP5-7  | 0.898 | 0 |
| KRTAP5-8  | 0.584 | 0 |
| KRTAP5-9  | 1.024 | 0 |
| KRTAP6-1  | 0.219 | 0 |
| KRTAP6-2  | 0.189 | 0 |
| KRTAP6-3  | 0.616 | 0 |
| KRTAP7-1  | 0.695 | 0 |

|          |        |        |
|----------|--------|--------|
| KRTAP8-1 | 0.556  | 0      |
| KRTAP8P1 | 0.123  | 0      |
| KRTAP8P2 | 0.111  | 0      |
| KRTAP9-2 | 1.005  | 0      |
| KRTAP9-3 | 0.992  | 0      |
| KRTAP9-4 | 0.967  | 0      |
| KRTAP9-5 | 0.861  | 0      |
| KRTAP9-8 | 0.526  | 0      |
| KRTAP9P1 | 0.525  | 0      |
| KRTCAP2  | 0.547  | 159.23 |
| KRTCAP3  | 0.857  | 0.88   |
| KRTHB4   | 1.777  | 2.18   |
| KRTHB5   | 0.514  | 6.39   |
| KSR1     | 4.803  | 2.07   |
| KSR2     | 2.49   | 0.03   |
| KTELC1   | 4.242  | 2.32   |
| KTI12    | 1.696  | 10.08  |
| KTN1     | 4.793  | 20.68  |
| Kua      | 2.187  | 14.63  |
| Kua-UEV  | 2.943  | 35.18  |
| KU-MEL-3 | 1.143  | 0      |
| KY       | 2.045  | 0      |
| KYNU     | 1.928  | 0      |
| L1CAM    | 4.525  | 0.11   |
| L1TD1    | 3.042  | 0      |
| L2HGDH   | 2.064  | 0.7    |
| L3MBTL   | 3.833  | 0.48   |
| L3MBTL2  | 4.43   | 10.29  |
| L3MBTL3  | 4.2    | 2.45   |
| L3MBTL4  | 4.525  | 0.22   |
| LACE1    | 2.262  | 0.37   |
| LACRT    | 0.508  | 0      |
| LACTB    | 2.282  | 1.95   |
| LACTB2   | 1.508  | 2.52   |
| LAD1     | 2.839  | 0      |
| LAG3     | 1.99   | 0.64   |
| LAGE3    | 0.943  | 22.6   |
| LAIR1    | 2.989  | 104.61 |
| LAIR2    | 0.699  | 4.7    |
| LALBA    | 0.728  | 0      |
| LAMA1    | 9.515  | 0      |
| LAMA2    | 9.637  | 0      |
| LAMA3    | 10.68  | 8.58   |
| LAMA4    | 6.297  | 0.04   |
| LAMA5    | 11.426 | 0.39   |
| LAMB1    | 11.659 | 1.89   |
| LAMB2    | 5.808  | 7.39   |
| LAMB3    | 4.454  | 0.02   |
| LAMB4    | 11.708 | 0.04   |
| LAMC1    | 7.931  | 8.13   |

|            |        |         |
|------------|--------|---------|
| LAMC2      | 6.155  | 0       |
| LAMC3      | 5.098  | 0       |
| LAMP1      | 2.575  | 76.51   |
| LAMP2      | 4.651  | 7.13    |
| LAMP3      | 3.297  | 0.03    |
| LANCL1     | 4.54   | 9.2     |
| LANCL2     | 8.706  | 1.37    |
| LANCL3     | 3.331  | 0.25    |
| LAP3       | 2.1    | 32.85   |
| LAPTM4A    | 1.419  | 52.36   |
| LAPTM4B    | 2.238  | 69.14   |
| LAPTM5     | 2.223  | 1583.99 |
| LARGE      | 4.194  | 17.13   |
| LARP1      | 7.458  | 30.24   |
| LARP2      | 6.247  | 0.76    |
| LARP4      | 6.634  | 1.8     |
| LARP5      | 5.64   | 9.68    |
| LARP6      | 2.343  | 0       |
| LARP7      | 1.437  | 15.59   |
| LARS       | 4.244  | 20.13   |
| LARS2      | 4.203  | 6.99    |
| LAS1L      | 2.466  | 27.74   |
| LASP1      | 3.845  | 87.61   |
| LASS1      | 2.094  | 0.04    |
| LASS1-GDF1 | 0.1    | 0       |
| LASS2      | 2.43   | 67.39   |
| LASS3      | 3.894  | 0       |
| LASS4      | 1.774  | 1.43    |
| LASS5      | 1.945  | 19.19   |
| LASS6      | 6.583  | 11.13   |
| LAT        | 2.037  | 1.2     |
| LAT1-3TM   | 0.615  | 0.27    |
| LAT2       | 4.62   | 73.12   |
| LATS1      | 4.755  | 3.84    |
| LATS2      | 4.236  | 5.51    |
| LAX1       | 3.245  | 1.3     |
| LAYN       | 2.066  | 1.95    |
| LBA1       | 10.815 | 7.35    |
| LBH        | 2.928  | 11.54   |
| LBP        | 1.823  | 0       |
| LBR        | 3.904  | 10.32   |
| LBX1       | 1.285  | 0       |
| LBX2       | 1.452  | 0.12    |
| LBXCOR1    | 2.766  | 0.03    |
| LCAP       | 1.391  | 0       |
| LCAT       | 1.354  | 0.5     |
| LCE1A      | 0.333  | 0       |
| LCE1B      | 1.139  | 0       |
| LCE1C      | 0.695  | 0       |
| LCE1D      | 0.345  | 0       |



|         |       |        |
|---------|-------|--------|
| LCE1E   | 1.18  | 0      |
| LCE1F   | 0.357 | 0      |
| LCE2A   | 0.592 | 0      |
| LCE2B   | 0.612 | 0      |
| LCE2C   | 0.614 | 0      |
| LCE2D   | 0.609 | 0      |
| LCE3A   | 0.27  | 0      |
| LCE3B   | 0.288 | 0      |
| LCE3C   | 0.285 | 0      |
| LCE3D   | 0.61  | 0      |
| LCE3E   | 0.611 | 0      |
| LCE4A   | 0.3   | 0      |
| LCE5A   | 0.819 | 0      |
| LCK     | 2.019 | 19.65  |
| LCMT1   | 1.37  | 17.22  |
| LCMT2   | 2.918 | 1.79   |
| LCN1    | 0.779 | 0      |
| LCN10   | 0.564 | 2.84   |
| LCN12   | 0.689 | 0.25   |
| LCN2    | 0.845 | 26.42  |
| LCN6    | 0.711 | 1.78   |
| LCN8    | 0.918 | 0.46   |
| LCN9    | 0.531 | 0      |
| LCOR    | 4.834 | 0.53   |
| LCORL   | 3.463 | 0.99   |
| LCP1    | 3.724 | 198.6  |
| LCP2    | 2.76  | 29.91  |
| LCT     | 6.274 | 0.04   |
| LCTL    | 2.016 | 0.63   |
| LDB1    | 3.437 | 38.89  |
| LDB2    | 2.443 | 2.14   |
| LDB3    | 7.485 | 31.35  |
| LDHA    | 1.661 | 160.71 |
| LDHAL1  | 1.644 | 2.51   |
| LDHAL4  | 1.665 | 7.28   |
| LDHAL6A | 2.526 | 0      |
| LDHAL6B | 1.673 | 0      |
| LDHB    | 1.303 | 217.54 |
| LDHBP   | 1.004 | 40.44  |
| LDHC    | 1.33  | 0.95   |
| LDHD    | 2.267 | 0.08   |
| LDLR    | 5.174 | 1.92   |
| LDLRAD1 | 0.785 | 0.11   |
| LDLRAD2 | 4.012 | 4.94   |
| LDLRAD3 | 2.969 | 0      |
| LDLRAP1 | 2.845 | 28.72  |
| LDOC1   | 1.381 | 0.06   |
| LDOC1L  | 5.324 | 0.69   |
| LEAP2   | 1.856 | 0.14   |
| LECT1   | 1.66  | 0.05   |

|          |       |        |
|----------|-------|--------|
| LECT2    | 1.077 | 0      |
| LEF1     | 3.619 | 104.93 |
| LEFTY1   | 1.616 | 0      |
| LEFTY2   | 2.019 | 0      |
| LEFTY3   | 0.297 | 0      |
| LELP1    | 0.523 | 0      |
| LEMD1    | 0.779 | 0      |
| LEMD2    | 2.93  | 11.04  |
| LEMD3    | 4.744 | 10.38  |
| LENEP    | 0.649 | 0      |
| LENG1    | 0.89  | 10.5   |
| LENG4    | 2.529 | 24.75  |
| LENG8    | 5.649 | 35.79  |
| LENG9    | 1.919 | 5.4    |
| LEO1     | 2.148 | 9.85   |
| LEP      | 6.852 | 0      |
| LEPR     | 6.845 | 1.61   |
| LEPRE1   | 2.993 | 13.84  |
| LEPREL1  | 3.404 | 0      |
| LEPREL2  | 2.892 | 0.49   |
| LEPROT   | 1.147 | 7.5    |
| LEPROTL1 | 2.682 | 11.34  |
| LETM1    | 4.76  | 9.57   |
| LETM2    | 1.631 | 0.67   |
| LETMD1   | 3.89  | 11.22  |
| LFNG     | 5.362 | 2.4    |
| LGALS1   | 0.558 | 4.68   |
| LGALS12  | 1.694 | 0.45   |
| LGALS13  | 0.595 | 0      |
| LGALS14  | 1.321 | 0      |
| LGALS2   | 0.528 | 0.64   |
| LGALS3   | 0.91  | 1.67   |
| LGALS3BP | 2.258 | 47     |
| LGALS4   | 1.117 | 0.68   |
| LGALS7   | 0.483 | 0      |
| LGALS8   | 3.378 | 7.71   |
| LGALS9   | 1.696 | 61.09  |
| LGI1     | 2.254 | 0      |
| LGI2     | 3.321 | 0      |
| LGI3     | 3.266 | 0      |
| LGI4     | 2.814 | 2.69   |
| LGICZ1   | 1.81  | 19.92  |
| LGMN     | 2.138 | 58.98  |
| LGMN2P   | 1.979 | 10.73  |
| LGP2     | 2.613 | 5.41   |
| LGR4     | 5.206 | 0.21   |
| LGR5     | 2.88  | 0.24   |
| LGR6     | 3.64  | 14.83  |
| LGTN     | 2.097 | 37.56  |
| LHB      | 0.523 | 0      |

|        |        |       |
|--------|--------|-------|
| LHCGR  | 2.976  | 0     |
| LHFP   | 2.003  | 12.95 |
| LHFPL1 | 1.672  | 0.1   |
| LHFPL2 | 4.429  | 0.46  |
| LHFPL3 | 3.704  | 0     |
| LHFPL4 | 1.444  | 0     |
| LHFPL5 | 2.147  | 0     |
| LHPP   | 1.613  | 8.1   |
| LHX1   | 2.283  | 0     |
| LHX2   | 2.416  | 0.03  |
| LHX3   | 2.579  | 0     |
| LHX4   | 1.87   | 0.41  |
| LHX5   | 2.084  | 0     |
| LHX6   | 5.527  | 0     |
| LHX8   | 2.373  | 0     |
| LHX9   | 2.689  | 0     |
| LIAS   | 2.321  | 2.18  |
| LIF    | 3.872  | 0.76  |
| LIFR   | 10.079 | 0.03  |
| LIG1   | 3.083  | 8.3   |
| LIG3   | 3.856  | 7.16  |
| LIG4   | 4.224  | 1.66  |
| LILRA1 | 1.91   | 0.84  |
| LILRA2 | 1.94   | 29.96 |
| LILRA3 | 1.577  | 0.37  |
| LILRA4 | 1.708  | 0.05  |
| LILRA5 | 2.202  | 0.42  |
| LILRA6 | 1.395  | 0.06  |
| LILRB1 | 2.971  | 8.22  |
| LILRB2 | 2.197  | 9.13  |
| LILRB3 | 2.17   | 0.19  |
| LILRB4 | 3.721  | 0.2   |
| LILRB5 | 2.087  | 0.24  |
| LILRP1 | 2.104  | 0     |
| LILRP2 | 6.176  | 0     |
| LIM2   | 0.97   | 0     |
| LIMA1  | 3.649  | 0.6   |
| LIMD1  | 6.899  | 63.24 |
| LIMD2  | 3.522  | 48.81 |
| LIME1  | 1.178  | 5.07  |
| LIMK1  | 6.664  | 3.55  |
| LIMK2  | 4.959  | 6.2   |
| LIMS1  | 1.957  | 3.79  |
| LIMS2  | 2.111  | 9.14  |
| LIMS3  | 0.956  | 0     |
| LIN28  | 4.014  | 0     |
| LIN28B | 5.504  | 0     |
| LIN52  | 0.576  | 0.29  |
| LIN54  | 5.756  | 1.44  |
| LIN7A  | 1.23   | 0     |

|        |        |        |
|--------|--------|--------|
| LIN7B  | 0.755  | 2.9    |
| LIN7C  | 4.671  | 1.16   |
| LIN9   | 3.328  | 1.22   |
| LINCR  | 1.461  | 0      |
| LINGO1 | 2.932  | 0.03   |
| LINGO2 | 2.792  | 0      |
| LINGO4 | 2.606  | 6.14   |
| LINS1  | 2.386  | 2.4    |
| LIPA   | 2.624  | 27.03  |
| LIPC   | 1.603  | 2.21   |
| LIPE   | 3.806  | 1.57   |
| LIPF   | 1.365  | 0      |
| LIPG   | 4.141  | 0      |
| LIPH   | 2.474  | 0.03   |
| LIPI   | 1.636  | 0      |
| LIPJ   | 1.483  | 0      |
| LIPK   | 1.2    | 0      |
| LIPM   | 1.197  | 0      |
| LIPN   | 1.413  | 0      |
| LIPT1  | 1.722  | 2.06   |
| LITAF  | 2.356  | 38.86  |
| LIX1   | 3.886  | 0      |
| LIX1L  | 2.141  | 14.56  |
| LLGL1  | 4.225  | 5.92   |
| LLGL2  | 4.258  | 1.5    |
| LMAN1  | 3.519  | 14.39  |
| LMAN1L | 1.736  | 0      |
| LMAN2  | 1.583  | 100.04 |
| LMAN2L | 2.398  | 9.59   |
| LMBR1  | 5.532  | 1.54   |
| LMBR1L | 2.328  | 12.02  |
| LMBRD1 | 2.039  | 5.33   |
| LMBRD2 | 3.237  | 0.81   |
| LMCD1  | 1.734  | 8.35   |
| LMLN   | 2.02   | 0.21   |
| LMNA   | 3.393  | 19.37  |
| LMNB1  | 2.882  | 40.51  |
| LMNB2  | 4.635  | 34.99  |
| LMO1   | 1.274  | 0.53   |
| LMO2   | 2.294  | 22.73  |
| LMO3   | 3.882  | 0      |
| LMO4   | 2.062  | 10.33  |
| LMO6   | 1.99   | 5.55   |
| LMO7   | 7.233  | 1.07   |
| LMOD1  | 3.85   | 0.03   |
| LMOD3  | 4.069  | 0.27   |
| LMTK2  | 11.204 | 0.92   |
| LMTK3  | 4.972  | 0      |
| LMX1A  | 3.851  | 0      |
| LMX1B  | 1.119  | 0.15   |

|           |        |       |
|-----------|--------|-------|
| LNPEP     | 6.539  | 4.03  |
| LNK1      | 3.74   | 0.59  |
| LNK2      | 4.632  | 1.02  |
| LOC112703 | 1.225  | 1.17  |
| LOC113179 | 1.58   | 2.46  |
| LOC113230 | 1.425  | 0.54  |
| LOC113386 | 1.397  | 20.56 |
| LOC114984 | 0.878  | 19.38 |
| LOC115648 | 1.665  | 0.41  |
| LOC116143 | 2.244  | 2.82  |
| LOC116236 | 3.174  | 13.27 |
| LOC116349 | 0.456  | 0.19  |
| LOC116412 | 2.309  | 1.64  |
| LOC116437 | 0.493  | 0     |
| LOC118945 | 5.077  | 0     |
| LOC119358 | 0.354  | 9.52  |
| LOC119722 | 1.304  | 0     |
| LOC120126 | 1.182  | 0     |
| LOC120318 | 0.747  | 6.54  |
| LOC120321 | 6.677  | 0.35  |
| LOC120364 | 0.966  | 0.61  |
| LOC120376 | 1.672  | 0.55  |
| LOC120449 | 1.292  | 0.07  |
| LOC120824 | 1.359  | 0     |
| LOC120872 | 0.742  | 0.34  |
| LOC121006 | 5.025  | 0     |
| LOC121014 | 2.191  | 0     |
| LOC121054 | 1.279  | 0     |
| LOC121296 | 13.556 | 0.01  |
| LOC121456 | 32.275 | 0.03  |
| LOC121498 | 1.142  | 0     |
| LOC121520 | 1.279  | 0.52  |
| LOC121727 | 4.517  | 0     |
| LOC121792 | 1.146  | 0     |
| LOC121838 | 0.938  | 0     |
| LOC121906 | 10.674 | 0.15  |
| LOC121952 | 0.723  | 0     |
| LOC122145 | 1.796  | 0     |
| LOC122423 | 0.864  | 0     |
| LOC122589 | 1.025  | 1.56  |
| LOC122592 | 4.793  | 0     |
| LOC122867 | 0.509  | 10.43 |
| LOC123103 | 1.362  | 0.19  |
| LOC123688 | 2.18   | 0.5   |
| LOC123855 | 3.259  | 0     |
| LOC123862 | 0.401  | 0.63  |
| LOC123876 | 2.322  | 0     |
| LOC124199 | 3.087  | 1.88  |
| LOC124220 | 0.828  | 0.31  |
| LOC124446 | 1.058  | 93.55 |

|           |        |        |
|-----------|--------|--------|
| LOC124496 | 0.76   | 12.41  |
| LOC124512 | 1.025  | 26.55  |
| LOC124865 | 0.703  | 1.68   |
| LOC124974 | 0.8    | 0.32   |
| LOC125208 | 0.911  | 568.11 |
| LOC125242 | 0.246  | 0      |
| LOC126075 | 3.259  | 1.29   |
| LOC126147 | 1.836  | 0.42   |
| LOC126170 | 0.48   | 0      |
| LOC126235 | 0.868  | 0.58   |
| LOC126242 | 0.95   | 12.76  |
| LOC126506 | 1.958  | 3.22   |
| LOC126520 | 1.933  | 0.04   |
| LOC126536 | 3.102  | 0      |
| LOC126661 | 1.031  | 2.21   |
| LOC126811 | 8.059  | 0.03   |
| LOC126860 | 0.492  | 0      |
| LOC126987 | 3.724  | 0      |
| LOC127011 | 1.034  | 6.52   |
| LOC127086 | 3.465  | 0.07   |
| LOC127099 | 0.351  | 0.48   |
| LOC127295 | 0.243  | 91.52  |
| LOC127406 | 0.522  | 0.65   |
| LOC127602 | 13.622 | 0      |
| LOC127671 | 17.297 | 0      |
| LOC128102 | 0.161  | 0      |
| LOC128136 | 29.845 | 0      |
| LOC128192 | 0.492  | 0.34   |
| LOC128322 | 0.381  | 0.88   |
| LOC128820 | 2.889  | 0      |
| LOC128977 | 1.567  | 10.32  |
| LOC129026 | 2.482  | 0.03   |
| LOC129293 | 1.859  | 0.27   |
| LOC129402 | 2.119  | 0      |
| LOC129522 | 1.977  | 1.41   |
| LOC129530 | 0.99   | 0.43   |
| LOC129560 | 2.599  | 2.4    |
| LOC129607 | 1.609  | 0.53   |
| LOC129656 | 10.185 | 0.14   |
| LOC129841 | 0.883  | 0.19   |
| LOC129870 | 1.182  | 0      |
| LOC129881 | 2.351  | 0.03   |
| LOC130074 | 4.072  | 18.06  |
| LOC130195 | 2.827  | 0      |
| LOC130355 | 1.15   | 2.63   |
| LOC130429 | 0.844  | 0.2    |
| LOC130576 | 1.573  | 0      |
| LOC130700 | 0.618  | 6.82   |
| LOC130728 | 0.821  | 0.1    |
| LOC130773 | 0.497  | 0      |

|           |        |        |
|-----------|--------|--------|
| LOC130865 | 0.437  | 0.77   |
| LOC130940 | 2.186  | 0      |
| LOC130951 | 2.543  | 0.1    |
| LOC131054 | 48.124 | 0.05   |
| LOC131055 | 0.753  | 0.56   |
| LOC131149 | 1.434  | 0      |
| LOC131185 | 2.779  | 4.25   |
| LOC131572 | 1.052  | 0.08   |
| LOC131691 | 0.701  | 0.24   |
| LOC131873 | 9.089  | 0.01   |
| LOC131909 | 2.295  | 0      |
| LOC131961 | 2.264  | 0.67   |
| LOC131973 | 5.244  | 0      |
| LOC132205 | 108.44 | 0      |
| LOC132386 | 0.751  | 0.22   |
| LOC132391 | 1.272  | 0      |
| LOC132430 | 10.36  | 0      |
| LOC132556 | 0.487  | 11.59  |
| LOC132707 | 0.3    | 0      |
| LOC132719 | 0.916  | 0      |
| LOC132817 | 7.303  | 0.05   |
| LOC133083 | 1.58   | 1.44   |
| LOC133185 | 0.333  | 0      |
| LOC133308 | 2.427  | 3.99   |
| LOC133332 | 2.324  | 0.08   |
| LOC133491 | 2.723  | 0      |
| LOC133569 | 0.482  | 0.87   |
| LOC133629 | 0.532  | 201.56 |
| LOC133748 | 0.792  | 0.11   |
| LOC133789 | 0.315  | 13.64  |
| LOC133790 | 0.459  | 5.14   |
| LOC133874 | 0.452  | 0      |
| LOC134121 | 2.774  | 0      |
| LOC134145 | 1.814  | 3.48   |
| LOC134357 | 23.633 | 0.11   |
| LOC134466 | 2.456  | 0.03   |
| LOC134505 | 0.656  | 19.14  |
| LOC134997 | 0.811  | 112.28 |
| LOC135270 | 1.042  | 2.83   |
| LOC135896 | 0.939  | 0      |
| LOC136143 | 0.471  | 265.59 |
| LOC136242 | 2.378  | 0      |
| LOC136288 | 4.665  | 0      |
| LOC136307 | 4.506  | 0.03   |
| LOC136542 | 12.7   | 0.02   |
| LOC137012 | 1.303  | 0.97   |
| LOC137107 | 0.648  | 0.65   |
| LOC137885 | 0.342  | 0      |
| LOC137886 | 4.971  | 0.59   |
| LOC138046 | 2.903  | 0      |

|           |         |       |
|-----------|---------|-------|
| LOC138159 | 3.888   | 0     |
| LOC138234 | 0.581   | 6.96  |
| LOC138412 | 101.225 | 0.5   |
| LOC138652 | 1.563   | 0     |
| LOC138864 | 0.486   | 8.67  |
| LOC138916 | 1.466   | 0.12  |
| LOC138948 | 2.901   | 0.49  |
| LOC138971 | 1.637   | 0.98  |
| LOC138972 | 9.276   | 0.01  |
| LOC139060 | 1.163   | 0     |
| LOC139061 | 0.469   | 0     |
| LOC139163 | 8.825   | 0.04  |
| LOC139201 | 1.274   | 0.2   |
| LOC139249 | 5.116   | 0     |
| LOC139334 | 2.3     | 0.55  |
| LOC139363 | 5.509   | 0     |
| LOC139431 | 0.652   | 0     |
| LOC139452 | 0.864   | 0.88  |
| LOC139466 | 95.279  | 0.02  |
| LOC139516 | 11.127  | 0.01  |
| LOC139587 | 21.348  | 0     |
| LOC139604 | 0.975   | 0     |
| LOC139735 | 1.2     | 0     |
| LOC139748 | 22.913  | 0     |
| LOC139952 | 38.669  | 0.02  |
| LOC139957 | 0.691   | 0.86  |
| LOC140004 | 2.836   | 0     |
| LOC140028 | 1.267   | 0     |
| LOC140446 | 2.223   | 0     |
| LOC143188 | 0.541   | 0.47  |
| LOC143244 | 4.043   | 1.73  |
| LOC143506 | 0.585   | 0     |
| LOC143543 | 1.827   | 0.5   |
| LOC143666 | 2.078   | 0.52  |
| LOC143678 | 0.365   | 0     |
| LOC143941 | 0.679   | 0.25  |
| LOC144097 | 1.961   | 23.16 |
| LOC144233 | 1.482   | 1.14  |
| LOC144383 | 0.667   | 13.76 |
| LOC144481 | 1.36    | 27.62 |
| LOC144817 | 2.036   | 0     |
| LOC145757 | 0.61    | 0     |
| LOC145783 | 1.443   | 7.77  |
| LOC145814 | 0.995   | 0     |
| LOC145837 | 1.18    | 0     |
| LOC145853 | 0.772   | 10.91 |
| LOC145989 | 1.478   | 13.62 |
| LOC146053 | 0.898   | 1.51  |
| LOC146110 | 0.62    | 0.68  |
| LOC146167 | 1.308   | 0     |



|           |        |      |
|-----------|--------|------|
| LOC146177 | 4.216  | 0.02 |
| LOC146253 | 2.51   | 3.99 |
| LOC146325 | 2.217  | 0    |
| LOC146429 | 1.86   | 0    |
| LOC146439 | 3.586  | 0.09 |
| LOC146481 | 1.414  | 0    |
| LOC146517 | 7.518  | 3.91 |
| LOC146909 | 2.669  | 3.94 |
| LOC147150 | 2.083  | 1.78 |
| LOC147226 | 2.046  | 1.15 |
| LOC147228 | 3.987  | 0    |
| LOC147645 | 3.679  | 0    |
| LOC147646 | 1.318  | 1.98 |
| LOC147650 | 1.894  | 0.84 |
| LOC147710 | 0.991  | 0    |
| LOC147804 | 0.979  | 3.27 |
| LOC148003 | 0.596  | 0    |
| LOC148198 | 4.135  | 0.06 |
| LOC148430 | 13.754 | 0.46 |
| LOC148646 | 3.014  | 0    |
| LOC148696 | 3.527  | 0    |
| LOC148709 | 15.809 | 0.03 |
| LOC148766 | 0.498  | 0.17 |
| LOC149086 | 0.777  | 0.11 |
| LOC149134 | 2.549  | 0.56 |
| LOC149157 | 0.884  | 0    |
| LOC149224 | 0.582  | 1.01 |
| LOC149351 | 1.555  | 0    |
| LOC149478 | 1.308  | 2.64 |
| LOC149501 | 3.905  | 0    |
| LOC149643 | 0.506  | 0    |
| LOC149773 | 1.419  | 0    |
| LOC149844 | 2.558  | 7.38 |
| LOC150084 | 2.066  | 0    |
| LOC150221 | 6.105  | 0.07 |
| LOC150223 | 2.356  | 11.4 |
| LOC150383 | 2.841  | 2.73 |
| LOC150417 | 1.024  | 6.5  |
| LOC150516 | 3.075  | 0.44 |
| LOC150554 | 2.769  | 1.71 |
| LOC150577 | 3.115  | 0    |
| LOC150739 | 0.642  | 0    |
| LOC150763 | 2.823  | 0.72 |
| LOC150786 | 3.044  | 0.74 |
| LOC150935 | 0.513  | 0    |
| LOC151121 | 0.458  | 0    |
| LOC151174 | 0.733  | 0.58 |
| LOC151234 | 1.875  | 0    |
| LOC151276 | 0.562  | 1.05 |
| LOC151457 | 2.743  | 2.09 |

|           |        |        |
|-----------|--------|--------|
| LOC151507 | 2.04   | 1.74   |
| LOC151579 | 2.877  | 7.02   |
| LOC151760 | 0.913  | 0      |
| LOC151825 | 1.282  | 0      |
| LOC152024 | 2.967  | 0.11   |
| LOC152028 | 2.04   | 0.04   |
| LOC152118 | 0.58   | 0      |
| LOC152217 | 1.441  | 20.52  |
| LOC152485 | 4.156  | 2.06   |
| LOC152573 | 1.971  | 0      |
| LOC152586 | 3.783  | 0      |
| LOC152594 | 1.7    | 7.78   |
| LOC152663 | 0.624  | 6.88   |
| LOC152667 | 1.377  | 7.03   |
| LOC152742 | 2.325  | 0      |
| LOC152845 | 1.489  | 0.34   |
| LOC152905 | 2.584  | 10.11  |
| LOC153222 | 5.446  | 1.67   |
| LOC153328 | 1.148  | 0      |
| LOC153364 | 4.28   | 1.1    |
| LOC153684 | 2.311  | 2.26   |
| LOC153893 | 0.869  | 0.29   |
| LOC153932 | 5.449  | 2.14   |
| LOC154449 | 1.33   | 0      |
| LOC154872 | 1.338  | 0      |
| LOC154907 | 0.844  | 0      |
| LOC154937 | 4.27   | 0.38   |
| LOC155006 | 5.274  | 0      |
| LOC155100 | 4.306  | 0.96   |
| LOC157489 | 4.306  | 0.88   |
| LOC157667 | 0.52   | 10.69  |
| LOC157713 | 2.42   | 3.41   |
| LOC157916 | 1.356  | 0      |
| LOC158078 | 1.741  | 159.43 |
| LOC158301 | 2.141  | 0.12   |
| LOC158345 | 13.198 | 8.17   |
| LOC158376 | 1.538  | 0.11   |
| LOC158381 | 3.928  | 0.66   |
| LOC158383 | 1.747  | 0.62   |
| LOC158452 | 1.25   | 0.07   |
| LOC158572 | 0.443  | 0.19   |
| LOC158714 | 2.855  | 7.64   |
| LOC158781 | 2.655  | 0.38   |
| LOC158830 | 0.566  | 1.49   |
| LOC158852 | 1.01   | 0      |
| LOC158948 | 2.254  | 0.9    |
| LOC159007 | 2.558  | 1.49   |
| LOC159770 | 1.336  | 0.38   |
| LOC160313 | 0.635  | 0      |
| LOC160410 | 0.981  | 0.86   |

|           |        |       |
|-----------|--------|-------|
| LOC161247 | 0.91   | 0.74  |
| LOC161527 | 7.181  | 0     |
| LOC161931 | 2.283  | 0     |
| LOC162073 | 1.738  | 2.76  |
| LOC162427 | 3.759  | 17.7  |
| LOC162993 | 2.77   | 0.79  |
| LOC165186 | 2.767  | 0     |
| LOC168474 | 37.8   | 0.08  |
| LOC169834 | 2.379  | 0     |
| LOC192127 | 1.72   | 0     |
| LOC192128 | 1.585  | 0     |
| LOC192130 | 0.917  | 0     |
| LOC192131 | 0.514  | 0     |
| LOC192132 | 0.516  | 0     |
| LOC192133 | 0.703  | 95.26 |
| LOC196120 | 0.585  | 0     |
| LOC196188 | 0.701  | 0.24  |
| LOC196264 | 0.983  | 0.34  |
| LOC196346 | 0.846  | 0     |
| LOC196415 | 1.516  | 0.11  |
| LOC196463 | 2.568  | 4.36  |
| LOC196469 | 1.154  | 0.14  |
| LOC196541 | 1.085  | 0     |
| LOC196549 | 3.283  | 0.08  |
| LOC196752 | 2.272  | 0.93  |
| LOC196913 | 0.975  | 0     |
| LOC196993 | 1.332  | 0     |
| LOC197135 | 1.979  | 2.29  |
| LOC197322 | 3.555  | 9.83  |
| LOC197331 | 2.167  | 0.04  |
| LOC197350 | 1.437  | 0     |
| LOC198437 | 0.868  | 0.68  |
| LOC199800 | 1.728  | 1.46  |
| LOC199882 | 0.525  | 0     |
| LOC199897 | 0.65   | 0     |
| LOC200025 | 1.723  | 0.1   |
| LOC200149 | 3.191  | 0     |
| LOC200230 | 2.405  | 0.38  |
| LOC200261 | 1.896  | 0.18  |
| LOC200312 | 1.922  | 4.65  |
| LOC200420 | 1.597  | 0.16  |
| LOC200810 | 0.805  | 0     |
| LOC201164 | 2.563  | 3.09  |
| LOC201175 | 2.319  | 1.71  |
| LOC201181 | 1.989  | 0     |
| LOC201259 | 2.932  | 0.05  |
| LOC201288 | 6.196  | 0     |
| LOC201626 | 3.882  | 2.69  |
| LOC201651 | 15.233 | 0     |
| LOC201725 | 3.503  | 2.14  |

|           |         |        |
|-----------|---------|--------|
| LOC202051 | 1.651   | 6.53   |
| LOC202122 | 0.416   | 1.62   |
| LOC202134 | 5.329   | 0      |
| LOC202181 | 2.751   | 1.19   |
| LOC202227 | 0.661   | 0.76   |
| LOC202319 | 0.478   | 0.7    |
| LOC202459 | 1.197   | 3.52   |
| LOC203510 | 1.965   | 0      |
| LOC203547 | 4.688   | 5.63   |
| LOC203930 | 2.736   | 1.17   |
| LOC204010 | 1       | 0.34   |
| LOC204800 | 1.154   | 3.87   |
| LOC205251 | 0.679   | 10.17  |
| LOC205272 | 3.695   | 0      |
| LOC206227 | 0.633   | 0      |
| LOC219404 | 1.945   | 33     |
| LOC219752 | 161.418 | 0      |
| LOC219854 | 3.657   | 3.11   |
| LOC220077 | 1.442   | 0.41   |
| LOC220115 | 100.711 | 0.01   |
| LOC220147 | 1.458   | 0      |
| LOC220429 | 2.649   | 0      |
| LOC220433 | 2.672   | 2.2    |
| LOC220594 | 4.329   | 0.18   |
| LOC220686 | 2.272   | 2.56   |
| LOC220729 | 13.916  | 0.36   |
| LOC220959 | 30.643  | 0      |
| LOC221091 | 2.414   | 0.66   |
| LOC221442 | 3.037   | 0.36   |
| LOC221838 | 3.488   | 148.24 |
| LOC222005 | 68.691  | 0.07   |
| LOC222032 | 48.879  | 0      |
| LOC222052 | 1.158   | 1.46   |
| LOC222103 | 1.52    | 0.94   |
| LOC222699 | 3.592   | 0.16   |
| LOC222901 | 0.648   | 211.5  |
| LOC222967 | 6.212   | 0.28   |
| LOC23117  | 9.381   | 0.45   |
| LOC246135 | 1.916   | 0.44   |
| LOC246717 | 0.357   | 0.24   |
| LOC246718 | 3.569   | 3.09   |
| LOC246720 | 0.639   | 6.86   |
| LOC246723 | 0.585   | 15.41  |
| LOC246784 | 1.695   | 5.32   |
| LOC246785 | 1.725   | 13.72  |
| LOC252840 | 0.904   | 0      |
| LOC252841 | 0.906   | 0      |
| LOC252968 | 3.001   | 0.28   |
| LOC253012 | 6.46    | 0.17   |
| LOC253482 | 0.699   | 642.43 |

|           |        |       |
|-----------|--------|-------|
| LOC253665 | 0.463  | 10.19 |
| LOC253724 | 3.97   | 0.02  |
| LOC253820 | 0.63   | 0     |
| LOC253970 | 1.487  | 0     |
| LOC254398 | 4.851  | 0     |
| LOC255130 | 0.919  | 0.46  |
| LOC255208 | 2.12   | 0     |
| LOC255275 | 3.042  | 0.03  |
| LOC255308 | 2.672  | 23.05 |
| LOC255374 | 3.004  | 0.14  |
| LOC255411 | 0.894  | 0     |
| LOC255480 | 0.991  | 0     |
| LOC255519 | 28.116 | 0.01  |
| LOC255620 | 1.243  | 0.07  |
| LOC255649 | 2.124  | 0     |
| LOC255783 | 1.106  | 7.38  |
| LOC255809 | 1.41   | 7.17  |
| LOC256223 | 2.088  | 0     |
| LOC256374 | 0.525  | 0.16  |
| LOC256483 | 0.584  | 0     |
| LOC256880 | 1.985  | 0     |
| LOC257039 | 0.742  | 0.34  |
| LOC257054 | 2.556  | 0     |
| LOC257358 | 0.47   | 0     |
| LOC257407 | 4.128  | 0     |
| LOC25845  | 1.437  | 7.68  |
| LOC259308 | 6.298  | 0     |
| LOC260329 | 1.497  | 6.87  |
| LOC260334 | 2.168  | 0     |
| LOC260337 | 3.085  | 1.8   |
| LOC260338 | 2.182  | 0     |
| LOC260339 | 2.768  | 0     |
| LOC260340 | 1.945  | 0     |
| LOC260341 | 4.856  | 2.25  |
| LOC260421 | 1.108  | 1.45  |
| LOC260422 | 1.605  | 1.63  |
| LOC26221  | 3.022  | 0.37  |
| LOC266619 | 0.211  | 0     |
| LOC266683 | 0.352  | 5.5   |
| LOC266693 | 0.577  | 2.48  |
| LOC266694 | 0.832  | 1.42  |
| LOC266783 | 2.846  | 12.4  |
| LOC266786 | 1.7    | 0.1   |
| LOC268276 | 1.201  | 0     |
| LOC280637 | 0.931  | 3.53  |
| LOC280644 | 2.713  | 0.8   |
| LOC283014 | 10.252 | 0.21  |
| LOC283028 | 2.436  | 0     |
| LOC283104 | 1.776  | 0.09  |
| LOC283114 | 0.491  | 23.16 |

|           |        |      |
|-----------|--------|------|
| LOC283116 | 2.162  | 0    |
| LOC283129 | 0.843  | 0    |
| LOC283143 | 3.322  | 0    |
| LOC283152 | 0.625  | 2.83 |
| LOC283155 | 9.327  | 0    |
| LOC283172 | 0.899  | 0    |
| LOC283174 | 3.888  | 0.13 |
| LOC283236 | 0.572  | 0    |
| LOC283257 | 7.553  | 0    |
| LOC283320 | 1.752  | 0.05 |
| LOC283331 | 3.371  | 5.05 |
| LOC283343 | 1.231  | 0    |
| LOC283345 | 0.586  | 1.3  |
| LOC283392 | 0.43   | 0    |
| LOC283398 | 2.554  | 2.54 |
| LOC283412 | 0.64   | 0.79 |
| LOC283440 | 0.572  | 0    |
| LOC283480 | 0.868  | 0    |
| LOC283481 | 1.128  | 0    |
| LOC283514 | 1.92   | 0.08 |
| LOC283523 | 2.034  | 0.08 |
| LOC283537 | 3.157  | 4.38 |
| LOC283547 | 1.542  | 0.11 |
| LOC283551 | 2.686  | 0.03 |
| LOC283553 | 0.576  | 0    |
| LOC283584 | 0.77   | 0    |
| LOC283585 | 1.766  | 0    |
| LOC283663 | 1.177  | 0.5  |
| LOC283683 | 2.09   | 0.44 |
| LOC283688 | 0.811  | 0    |
| LOC283693 | 1.119  | 0.15 |
| LOC283698 | 1.641  | 1.44 |
| LOC283710 | 1.033  | 0.25 |
| LOC283755 | 4.222  | 1.81 |
| LOC283767 | 3.699  | 0    |
| LOC283804 | 1.845  | 0    |
| LOC283867 | 2.48   | 0.1  |
| LOC283871 | 4.346  | 3.95 |
| LOC283874 | 5.578  | 0.7  |
| LOC283904 | 3.408  | 0    |
| LOC283951 | 1.071  | 5.51 |
| LOC283953 | 0.644  | 0    |
| LOC283970 | 2.248  | 1.05 |
| LOC283999 | 1.003  | 0    |
| LOC284009 | 0.961  | 3.51 |
| LOC284023 | 2.523  | 0.87 |
| LOC284064 | 0.468  | 1.26 |
| LOC284067 | 0.974  | 0    |
| LOC284100 | 2.449  | 0    |
| LOC284167 | 21.208 | 0.51 |

|           |        |       |
|-----------|--------|-------|
| LOC284184 | 0.766  | 36.07 |
| LOC284196 | 3.986  | 0     |
| LOC284215 | 1.109  | 0     |
| LOC284226 | 10.167 | 0.04  |
| LOC284230 | 0.399  | 1.48  |
| LOC284269 | 2.399  | 0.42  |
| LOC284274 | 1.369  | 0     |
| LOC284288 | 0.564  | 1.19  |
| LOC284296 | 4.203  | 0.16  |
| LOC284297 | 0.418  | 0.2   |
| LOC284361 | 3.237  | 42.57 |
| LOC284371 | 3.537  | 1.15  |
| LOC284379 | 5.092  | 0     |
| LOC284395 | 0.564  | 0     |
| LOC284402 | 0.365  | 0     |
| LOC284422 | 0.908  | 87.58 |
| LOC284428 | 0.777  | 0     |
| LOC284441 | 3.594  | 11.11 |
| LOC284577 | 2.897  | 0     |
| LOC284620 | 0.741  | 0.11  |
| LOC284685 | 2.197  | 29.41 |
| LOC284701 | 0.836  | 0     |
| LOC284751 | 0.432  | 0     |
| LOC284757 | 4.211  | 0     |
| LOC284801 | 2.273  | 14.86 |
| LOC284821 | 1.143  | 5.53  |
| LOC284861 | 3.821  | 0     |
| LOC284890 | 0.716  | 0     |
| LOC284912 | 0.853  | 0     |
| LOC284952 | 3.218  | 0.24  |
| LOC284964 | 1.518  | 0     |
| LOC284988 | 2.949  | 0.2   |
| LOC284998 | 2.113  | 0.36  |
| LOC285016 | 0.496  | 0.34  |
| LOC285033 | 0.537  | 1.41  |
| LOC285047 | 0.769  | 0     |
| LOC285053 | 1.597  | 13.77 |
| LOC285074 | 1.957  | 3.44  |
| LOC285095 | 0.597  | 1.56  |
| LOC285141 | 0.596  | 0     |
| LOC285176 | 0.778  | 4.44  |
| LOC285191 | 2.106  | 0     |
| LOC285205 | 0.775  | 0     |
| LOC285216 | 12.107 | 0     |
| LOC285232 | 3.591  | 0.61  |
| LOC285260 | 0.371  | 1.82  |
| LOC285296 | 6.079  | 0.19  |
| LOC285299 | 2.075  | 12.83 |
| LOC285303 | 3.569  | 0     |
| LOC285346 | 0.867  | 1.46  |

|           |         |        |
|-----------|---------|--------|
| LOC285359 | 2.478   | 1.56   |
| LOC285382 | 5.901   | 0.94   |
| LOC285407 | 0.895   | 0.75   |
| LOC285412 | 2.279   | 2.44   |
| LOC285423 | 2.138   | 0      |
| LOC285442 | 2.503   | 1.75   |
| LOC285453 | 1.102   | 0.54   |
| LOC285484 | 2.756   | 0.06   |
| LOC285501 | 1.037   | 0      |
| LOC285550 | 9.011   | 3.34   |
| LOC285556 | 10.186  | 0      |
| LOC285563 | 0.597   | 0      |
| LOC285588 | 0.48    | 0      |
| LOC285591 | 1.254   | 8.87   |
| LOC285634 | 42.058  | 0.08   |
| LOC285636 | 5.222   | 3.31   |
| LOC285643 | 4.426   | 0.56   |
| LOC285647 | 2.66    | 1.62   |
| LOC285679 | 1.182   | 0.07   |
| LOC285697 | 0.552   | 0      |
| LOC285706 | 2.476   | 0.48   |
| LOC285733 | 2.738   | 0      |
| LOC285735 | 0.322   | 0      |
| LOC285741 | 0.744   | 502.14 |
| LOC285840 | 1.392   | 0      |
| LOC285872 | 2.418   | 0.28   |
| LOC285900 | 1.728   | 0.64   |
| LOC285908 | 8.822   | 0.78   |
| LOC285941 | 3.912   | 0      |
| LOC285943 | 2.021   | 0      |
| LOC286016 | 4.034   | 1.38   |
| LOC286076 | 1.002   | 0.17   |
| LOC286150 | 0.877   | 1.44   |
| LOC286157 | 0.957   | 293.46 |
| LOC286187 | 1.084   | 0      |
| LOC286238 | 0.585   | 0      |
| LOC286239 | 153.029 | 0.02   |
| LOC286334 | 2.732   | 4.04   |
| LOC286348 | 0.778   | 0.75   |
| LOC286411 | 1.649   | 0      |
| LOC286434 | 2.197   | 0      |
| LOC286444 | 0.964   | 4.37   |
| LOC286456 | 2.927   | 0.29   |
| LOC286467 | 1.466   | 2.53   |
| LOC286495 | 6.168   | 3.74   |
| LOC286512 | 1.201   | 38.37  |
| LOC286526 | 1.029   | 0      |
| LOC286528 | 0.585   | 9.07   |
| LOC286568 | 0.543   | 0.47   |
| LOC286570 | 0.543   | 0.47   |



|           |        |       |
|-----------|--------|-------|
| LOC29060  | 1.834  | 0.14  |
| LOC317727 | 7.308  | 3.18  |
| LOC317753 | 1.456  | 1.56  |
| LOC317786 | 2.671  | 3.19  |
| LOC338091 | 0.465  | 4.17  |
| LOC338095 | 0.79   | 8.53  |
| LOC338096 | 0.805  | 0.1   |
| LOC338097 | 0.764  | 0.88  |
| LOC338098 | 0.374  | 17.79 |
| LOC338099 | 0.775  | 13.81 |
| LOC338328 | 2.28   | 0     |
| LOC338586 | 0.384  | 0     |
| LOC338588 | 1.864  | 0     |
| LOC338591 | 17.652 | 0.12  |
| LOC338598 | 8.789  | 0     |
| LOC338611 | 0.357  | 0     |
| LOC338667 | 2.967  | 0     |
| LOC338739 | 0.634  | 0.93  |
| LOC338756 | 0.531  | 0.31  |
| LOC338758 | 3.526  | 0.21  |
| LOC338797 | 0.501  | 0     |
| LOC338799 | 2.554  | 9.83  |
| LOC338805 | 0.387  | 0     |
| LOC338809 | 1.377  | 0     |
| LOC338829 | 3.657  | 0     |
| LOC338870 | 0.422  | 5.59  |
| LOC338963 | 0.436  | 0     |
| LOC339047 | 3.655  | 0.32  |
| LOC339123 | 2.17   | 24.03 |
| LOC339186 | 3.153  | 0     |
| LOC339192 | 0.473  | 2.67  |
| LOC339209 | 0.835  | 0     |
| LOC339229 | 1.659  | 21.38 |
| LOC339240 | 3.153  | 0     |
| LOC339241 | 3.988  | 0     |
| LOC339244 | 1.407  | 0     |
| LOC339256 | 4.414  | 0     |
| LOC339257 | 2.953  | 0.43  |
| LOC339258 | 3.156  | 0     |
| LOC339290 | 2.115  | 6.25  |
| LOC339344 | 1.887  | 5.49  |
| LOC339352 | 4.309  | 0.3   |
| LOC339396 | 4.47   | 0     |
| LOC339457 | 2.756  | 0     |
| LOC339524 | 2.375  | 0.07  |
| LOC339535 | 1.559  | 7.13  |
| LOC339562 | 0.474  | 0     |
| LOC339674 | 1.506  | 0.17  |
| LOC339736 | 2.286  | 0.14  |
| LOC339742 | 1.107  | 0     |

|           |         |       |
|-----------|---------|-------|
| LOC339745 | 5.709   | 0.65  |
| LOC339760 | 1.365   | 0     |
| LOC339766 | 5.749   | 0     |
| LOC339778 | 2.842   | 0     |
| LOC339781 | 1.333   | 0     |
| LOC339804 | 0.701   | 7.93  |
| LOC339809 | 5.135   | 0     |
| LOC339843 | 3.275   | 1.39  |
| LOC339845 | 4.645   | 0     |
| LOC339858 | 0.574   | 1.03  |
| LOC339879 | 2.262   | 0.49  |
| LOC339881 | 1.835   | 3.76  |
| LOC339897 | 51.955  | 0.02  |
| LOC339966 | 23.148  | 0.05  |
| LOC339970 | 4.107   | 1.67  |
| LOC339977 | 3.337   | 0     |
| LOC340069 | 1.176   | 0     |
| LOC340089 | 14.647  | 0     |
| LOC340094 | 0.751   | 0     |
| LOC340096 | 0.444   | 0     |
| LOC340113 | 2.008   | 0     |
| LOC340192 | 2.105   | 1.92  |
| LOC340204 | 0.575   | 0     |
| LOC340221 | 34.488  | 0.11  |
| LOC340268 | 2.349   | 0     |
| LOC340274 | 1.22    | 0.07  |
| LOC340286 | 3.194   | 0     |
| LOC340443 | 0.613   | 0.82  |
| LOC340460 | 4.374   | 0     |
| LOC340499 | 2.229   | 0.19  |
| LOC340501 | 7.968   | 0.02  |
| LOC340502 | 1.676   | 0     |
| LOC340508 | 8.537   | 0     |
| LOC340515 | 2.02    | 0     |
| LOC340569 | 0.437   | 0     |
| LOC340598 | 0.855   | 0     |
| LOC340600 | 1.436   | 0.29  |
| LOC340602 | 1.924   | 0     |
| LOC340623 | 1.163   | 0     |
| LOC340780 | 2.281   | 1.96  |
| LOC340844 | 5.802   | 0.47  |
| LOC340888 | 1.08    | 0     |
| LOC340900 | 1.101   | 0     |
| LOC340947 | 1.995   | 1.48  |
| LOC340970 | 32.339  | 0     |
| LOC341056 | 1.026   | 8.13  |
| LOC341112 | 0.558   | 0     |
| LOC341230 | 1.46    | 0.17  |
| LOC341315 | 3.922   | 28.78 |
| LOC341333 | 128.541 | 0.01  |

|           |        |       |
|-----------|--------|-------|
| LOC341346 | 0.859  | 0.1   |
| LOC341378 | 4.738  | 0.25  |
| LOC341392 | 1.743  | 0     |
| LOC341412 | 23.408 | 0.09  |
| LOC341457 | 0.688  | 1.1   |
| LOC341604 | 16.144 | 0.01  |
| LOC341651 | 0.764  | 8.6   |
| LOC341674 | 0.656  | 0.13  |
| LOC341689 | 2.362  | 0.14  |
| LOC341784 | 19.339 | 0.26  |
| LOC341965 | 1.02   | 7.35  |
| LOC342293 | 0.816  | 0     |
| LOC342346 | 3.18   | 0.05  |
| LOC342374 | 1.291  | 0     |
| LOC342419 | 11.856 | 0.01  |
| LOC342426 | 3.128  | 0     |
| LOC342443 | 2.2    | 0     |
| LOC342531 | 7.996  | 0.03  |
| LOC342541 | 0.546  | 0.31  |
| LOC342599 | 6.017  | 0.62  |
| LOC342705 | 1.444  | 12.84 |
| LOC342732 | 7.294  | 0.03  |
| LOC342784 | 1.638  | 1.13  |
| LOC342865 | 1.91   | 0     |
| LOC342897 | 1.973  | 0     |
| LOC342918 | 1.289  | 12.75 |
| LOC342979 | 1.516  | 0     |
| LOC343052 | 10.271 | 0.11  |
| LOC343165 | 1.942  | 0.39  |
| LOC343184 | 0.918  | 2.48  |
| LOC343296 | 1.13   | 2.09  |
| LOC343301 | 0.652  | 1.68  |
| LOC343326 | 1.596  | 0     |
| LOC343338 | 27.363 | 0     |
| LOC343384 | 0.492  | 0     |
| LOC343492 | 0.684  | 2.83  |
| LOC343495 | 1.202  | 0.49  |
| LOC343508 | 2.312  | 6.67  |
| LOC343515 | 1.272  | 5.5   |
| LOC343851 | 0.327  | 0     |
| LOC343981 | 81.031 | 0     |
| LOC344065 | 1.862  | 0.41  |
| LOC344167 | 0.582  | 0     |
| LOC344178 | 9.731  | 0     |
| LOC344320 | 4.522  | 0     |
| LOC344328 | 1.109  | 0.08  |
| LOC344332 | 0.282  | 0     |
| LOC344371 | 0.98   | 13.41 |
| LOC344382 | 1.047  | 9.41  |
| LOC344405 | 0.521  | 1.13  |

|           |        |        |
|-----------|--------|--------|
| LOC344423 | 0.701  | 2.04   |
| LOC344462 | 9.017  | 0.12   |
| LOC344471 | 0.498  | 0.51   |
| LOC344593 | 4.476  | 0.38   |
| LOC344595 | 1.34   | 0.5    |
| LOC344653 | 1.867  | 4.69   |
| LOC344657 | 1.825  | 0      |
| LOC344709 | 4.362  | 0.37   |
| LOC344741 | 0.964  | 0.79   |
| LOC344787 | 2.657  | 0.13   |
| LOC344866 | 9.542  | 0      |
| LOC344875 | 3.475  | 0      |
| LOC344887 | 14.573 | 0      |
| LOC344967 | 18.729 | 0.14   |
| LOC344978 | 57.183 | 0.54   |
| LOC345016 | 8.554  | 0.19   |
| LOC345041 | 1.838  | 2.62   |
| LOC345222 | 3.164  | 0.03   |
| LOC345258 | 1.703  | 0.39   |
| LOC345430 | 10.137 | 0      |
| LOC345471 | 1.132  | 11.46  |
| LOC345537 | 0.495  | 0.17   |
| LOC345571 | 6.579  | 0.85   |
| LOC345576 | 27.278 | 0.27   |
| LOC345630 | 1.13   | 0.3    |
| LOC345643 | 2.091  | 0      |
| LOC345645 | 15.711 | 0.06   |
| LOC345829 | 0.832  | 27.44  |
| LOC346085 | 1.248  | 37.39  |
| LOC346296 | 8.88   | 0.18   |
| LOC346329 | 2.136  | 0.71   |
| LOC346588 | 0.524  | 0      |
| LOC346653 | 2.398  | 0.14   |
| LOC346702 | 2.917  | 0.06   |
| LOC347028 | 1.871  | 2.61   |
| LOC347097 | 2.86   | 0.18   |
| LOC347119 | 1.404  | 0      |
| LOC347193 | 1.74   | 1.55   |
| LOC347273 | 2.632  | 0.2    |
| LOC347275 | 6.527  | 0      |
| LOC347281 | 54.793 | 0      |
| LOC347292 | 0.318  | 480.78 |
| LOC347333 | 80.54  | 0      |
| LOC347363 | 60.788 | 0      |
| LOC347364 | 0.282  | 0      |
| LOC347381 | 2      | 4.04   |
| LOC347411 | 0.897  | 0      |
| LOC347422 | 22.424 | 0.23   |
| LOC347475 | 1.55   | 0      |
| LOC347509 | 0.739  | 0      |

|           |        |        |
|-----------|--------|--------|
| LOC347549 | 0.864  | 0      |
| LOC347674 | 1.498  | 0      |
| LOC347675 | 1.327  | 0      |
| LOC347701 | 1.05   | 0      |
| LOC347716 | 9.572  | 0.03   |
| LOC347717 | 0.905  | 0      |
| LOC347806 | 25.012 | 0      |
| LOC348021 | 2.141  | 0      |
| LOC348174 | 1.955  | 0.13   |
| LOC348180 | 1.936  | 5.57   |
| LOC348262 | 3.007  | 0      |
| LOC348751 | 1.157  | 0      |
| LOC348801 | 2.991  | 2.2    |
| LOC348808 | 2.493  | 0      |
| LOC348840 | 2.171  | 0.47   |
| LOC348926 | 2.326  | 0.58   |
| LOC348958 | 1.844  | 0.41   |
| LOC349114 | 4.455  | 1.42   |
| LOC349196 | 0.435  | 0      |
| LOC349448 | 2.836  | 0      |
| LOC352905 | 0.928  | 0.09   |
| LOC353194 | 5.166  | 0      |
| LOC353196 | 1.407  | 0      |
| LOC359724 | 1.848  | 611.76 |
| LOC359791 | 15.416 | 0.01   |
| LOC359792 | 1.376  | 2.51   |
| LOC359793 | 2.241  | 0.19   |
| LOC359794 | 1.231  | 0.07   |
| LOC359795 | 0.432  | 0      |
| LOC359798 | 2.102  | 0.12   |
| LOC359800 | 1.77   | 2.71   |
| LOC359819 | 0.48   | 1.23   |
| LOC359996 | 1.92   | 0      |
| LOC359997 | 0.335  | 13.33  |
| LOC359998 | 0.606  | 0      |
| LOC359999 | 0.606  | 0      |
| LOC360009 | 0.933  | 0      |
| LOC360014 | 1.036  | 0      |
| LOC360015 | 63.721 | 0      |
| LOC360016 | 3.493  | 0      |
| LOC360017 | 3.494  | 0      |
| LOC360018 | 0.773  | 0      |
| LOC360020 | 13.416 | 0      |
| LOC360022 | 0.773  | 0      |
| LOC360024 | 2.917  | 0      |
| LOC360025 | 1.383  | 0      |
| LOC360026 | 1.383  | 0      |
| LOC360027 | 2.926  | 0      |
| LOC360028 | 5.777  | 0.01   |
| LOC360029 | 0.191  | 0      |

|           |        |       |
|-----------|--------|-------|
| LOC374395 | 0.864  | 45.04 |
| LOC374443 | 12.978 | 1     |
| LOC374491 | 20.185 | 0     |
| LOC374569 | 2.03   | 0     |
| LOC374920 | 2.935  | 10.07 |
| LOC374973 | 0.921  | 0     |
| LOC375010 | 2.535  | 0     |
| LOC375133 | 2.018  | 2.84  |
| LOC375190 | 2.28   | 0.41  |
| LOC375251 | 1.11   | 0     |
| LOC375295 | 2.532  | 0     |
| LOC375350 | 0.782  | 11.95 |
| LOC375449 | 1.066  | 0     |
| LOC375748 | 2.84   | 1.31  |
| LOC376475 | 5.833  | 1.27  |
| LOC376693 | 1.266  | 3.33  |
| LOC376818 | 1.944  | 0     |
| LOC386610 | 1.944  | 0     |
| LOC386728 | 3.247  | 0     |
| LOC387359 | 14.975 | 0     |
| LOC387360 | 9.135  | 0     |
| LOC387361 | 9.139  | 0     |
| LOC387364 | 12.286 | 0     |
| LOC387601 | 1.644  | 0     |
| LOC387646 | 3.262  | 0.15  |
| LOC387647 | 2.717  | 2.05  |
| LOC387654 | 0.9    | 0.56  |
| LOC387703 | 4.653  | 3.98  |
| LOC387720 | 2.435  | 0     |
| LOC387723 | 0.634  | 0.66  |
| LOC387745 | 20.342 | 0     |
| LOC387753 | 0.601  | 0.28  |
| LOC387758 | 3.007  | 0     |
| LOC387761 | 0.684  | 0     |
| LOC387763 | 2.487  | 2.06  |
| LOC387770 | 30.898 | 0.01  |
| LOC387787 | 1.897  | 3.11  |
| LOC387791 | 13.822 | 0.03  |
| LOC387804 | 1.312  | 0     |
| LOC387820 | 18.375 | 0.93  |
| LOC387825 | 60.535 | 0.03  |
| LOC387826 | 0.594  | 0     |
| LOC387845 | 1.413  | 6.2   |
| LOC387856 | 2.311  | 0.08  |
| LOC387867 | 1.061  | 0.56  |
| LOC387869 | 0.377  | 0     |
| LOC387876 | 1.164  | 0     |
| LOC387885 | 0.918  | 0.09  |
| LOC387890 | 0.695  | 0     |
| LOC387895 | 1.162  | 0     |

|           |        |         |
|-----------|--------|---------|
| LOC387911 | 1.002  | 0       |
| LOC387924 | 8.827  | 0.25    |
| LOC387927 | 0.703  | 0.48    |
| LOC387933 | 1.218  | 0.97    |
| LOC387934 | 0.703  | 1.08    |
| LOC387939 | 0.425  | 0       |
| LOC387941 | 0.901  | 0       |
| LOC387978 | 0.734  | 0       |
| LOC388002 | 0.637  | 0       |
| LOC388022 | 2.089  | 0.6     |
| LOC388076 | 0.719  | 5.39    |
| LOC388104 | 1.372  | 0.49    |
| LOC388122 | 0.948  | 0.08    |
| LOC388135 | 1.344  | 0       |
| LOC388147 | 0.719  | 11.6    |
| LOC388152 | 1.371  | 0.06    |
| LOC388153 | 0.491  | 0       |
| LOC388160 | 0.495  | 0       |
| LOC388161 | 5.435  | 0       |
| LOC388163 | 0.496  | 0       |
| LOC388177 | 1.037  | 13.97   |
| LOC388181 | 1.598  | 1.16    |
| LOC388194 | 24.848 | 0       |
| LOC388199 | 1.209  | 0.07    |
| LOC388210 | 1.344  | 0       |
| LOC388237 | 2.728  | 0.03    |
| LOC388242 | 4.091  | 0       |
| LOC388248 | 45.643 | 0.01    |
| LOC388255 | 0.522  | 0       |
| LOC388259 | 0.94   | 0       |
| LOC388272 | 1.383  | 2.62    |
| LOC388279 | 0.917  | 1.2     |
| LOC388282 | 1.29   | 0       |
| LOC388284 | 1.714  | 4.38    |
| LOC388312 | 3.103  | 0       |
| LOC388323 | 1.023  | 0.66    |
| LOC388333 | 0.845  | 0       |
| LOC388335 | 3.092  | 2.12    |
| LOC388339 | 0.546  | 371.19  |
| LOC388344 | 0.77   | 1173.18 |
| LOC388381 | 0.465  | 0       |
| LOC388401 | 0.842  | 0.8     |
| LOC388419 | 1.678  | 0       |
| LOC388436 | 0.532  | 0       |
| LOC388438 | 3.126  | 0       |
| LOC388444 | 1.367  | 0       |
| LOC388458 | 1.006  | 0       |
| LOC388459 | 0.717  | 0       |
| LOC388460 | 0.844  | 0.5     |
| LOC388474 | 1.044  | 1.85    |

|           |        |        |
|-----------|--------|--------|
| LOC388503 | 3.525  | 0      |
| LOC388514 | 21.24  | 0      |
| LOC388523 | 31.042 | 0      |
| LOC388524 | 1.397  | 72.17  |
| LOC388532 | 0.802  | 0.73   |
| LOC388553 | 1.776  | 0      |
| LOC388556 | 0.699  | 244.03 |
| LOC388559 | 1.77   | 0.86   |
| LOC388564 | 2.277  | 1.44   |
| LOC388572 | 1.992  | 0      |
| LOC388579 | 1.03   | 0.08   |
| LOC388588 | 0.73   | 0.69   |
| LOC388610 | 1.716  | 0.1    |
| LOC388621 | 0.633  | 0.14   |
| LOC388630 | 2.554  | 3.73   |
| LOC388692 | 3.389  | 7.21   |
| LOC388707 | 1.059  | 0.95   |
| LOC388720 | 0.588  | 5.88   |
| LOC388734 | 1.191  | 7.92   |
| LOC388743 | 1.426  | 0      |
| LOC388780 | 0.62   | 0      |
| LOC388789 | 0.605  | 55.42  |
| LOC388795 | 3.253  | 0      |
| LOC388813 | 1.063  | 0      |
| LOC388814 | 0.539  | 3.91   |
| LOC388817 | 0.73   | 28.85  |
| LOC388820 | 1.05   | 0      |
| LOC388849 | 1.267  | 0.07   |
| LOC388882 | 1.578  | 0      |
| LOC388885 | 0.561  | 1.5    |
| LOC388906 | 0.563  | 0.3    |
| LOC388907 | 1.031  | 100.9  |
| LOC388915 | 1.091  | 0      |
| LOC388923 | 1.114  | 0.15   |
| LOC388925 | 1.345  | 0.19   |
| LOC388931 | 1.508  | 0.11   |
| LOC388946 | 1.137  | 0      |
| LOC388948 | 1.029  | 0      |
| LOC388955 | 2.779  | 0.28   |
| LOC388963 | 3.074  | 0.6    |
| LOC388965 | 1.222  | 1.1    |
| LOC388969 | 3.053  | 14.18  |
| LOC388996 | 33.777 | 0.07   |
| LOC389000 | 1.495  | 0      |
| LOC389024 | 1.219  | 0.07   |
| LOC389033 | 0.401  | 0      |
| LOC389043 | 1.861  | 0      |
| LOC389049 | 44.326 | 0.23   |
| LOC389053 | 1.944  | 9.58   |
| LOC389072 | 2.315  | 0.51   |



|           |        |         |
|-----------|--------|---------|
| LOC389073 | 1.835  | 0       |
| LOC389101 | 5.421  | 0.31    |
| LOC389105 | 3.035  | 0       |
| LOC389118 | 1.188  | 0       |
| LOC389120 | 7.533  | 0       |
| LOC389124 | 0.512  | 0       |
| LOC389127 | 0.686  | 0       |
| LOC389137 | 2.069  | 4.85    |
| LOC389141 | 1.033  | 0.65    |
| LOC389151 | 1.896  | 0       |
| LOC389156 | 0.537  | 0.31    |
| LOC389160 | 55.476 | 0       |
| LOC389168 | 1.763  | 18.35   |
| LOC389173 | 1.645  | 0.05    |
| LOC389174 | 0.831  | 0       |
| LOC389179 | 1.388  | 4.25    |
| LOC389199 | 1.296  | 0       |
| LOC389203 | 1.207  | 13.33   |
| LOC389207 | 0.991  | 0       |
| LOC389217 | 1.158  | 0.07    |
| LOC389223 | 1.414  | 5.48    |
| LOC389230 | 0.533  | 0.16    |
| LOC389240 | 0.801  | 93.07   |
| LOC389246 | 1.076  | 0.7     |
| LOC389249 | 1.686  | 5.35    |
| LOC389257 | 2.546  | 13.83   |
| LOC389286 | 0.833  | 0       |
| LOC389293 | 2.373  | 0.39    |
| LOC389300 | 0.609  | 0       |
| LOC389322 | 4.574  | 6.26    |
| LOC389328 | 0.987  | 0       |
| LOC389332 | 1.696  | 0       |
| LOC389333 | 4.821  | 7.21    |
| LOC389342 | 0.778  | 1079.27 |
| LOC389365 | 0.65   | 0       |
| LOC389369 | 0.719  | 0       |
| LOC389370 | 0.758  | 0       |
| LOC389386 | 1.616  | 11.78   |
| LOC389395 | 1.546  | 0.11    |
| LOC389404 | 0.632  | 1.33    |
| LOC389428 | 7.179  | 2.71    |
| LOC389458 | 1.076  | 0       |
| LOC389465 | 5.56   | 0.74    |
| LOC389493 | 10.483 | 0.04    |
| LOC389517 | 4.542  | 0.39    |
| LOC389523 | 2.682  | 0.32    |
| LOC389541 | 1.187  | 42.72   |
| LOC389607 | 3.258  | 0.03    |
| LOC389633 | 3.011  | 0       |
| LOC389634 | 3.033  | 0       |

|           |        |        |
|-----------|--------|--------|
| LOC389641 | 1.97   | 1.45   |
| LOC389644 | 3.243  | 8.57   |
| LOC389651 | 3.918  | 0      |
| LOC389652 | 35.593 | 0      |
| LOC389654 | 2.036  | 0      |
| LOC389655 | 0.47   | 1.79   |
| LOC389662 | 65.429 | 0      |
| LOC389676 | 0.588  | 0      |
| LOC389705 | 23.58  | 0.02   |
| LOC389727 | 1.371  | 0      |
| LOC389740 | 8.767  | 0      |
| LOC389747 | 16.988 | 0      |
| LOC389768 | 6.106  | 0.04   |
| LOC389787 | 0.519  | 489.51 |
| LOC389791 | 2.081  | 0      |
| LOC389813 | 2.832  | 0.3    |
| LOC389827 | 0.666  | 0      |
| LOC389832 | 1.94   | 0      |
| LOC389833 | 1.599  | 0      |
| LOC389834 | 4.083  | 0      |
| LOC389842 | 1.048  | 16.55  |
| LOC389844 | 0.975  | 0      |
| LOC389849 | 1.153  | 49.75  |
| LOC389857 | 1.62   | 0      |
| LOC389873 | 1.176  | 2.87   |
| LOC389892 | 10.824 | 0.06   |
| LOC389895 | 0.822  | 0      |
| LOC389901 | 15.867 | 1.95   |
| LOC389904 | 7.476  | 0.03   |
| LOC389906 | 1.078  | 3.28   |
| LOC389935 | 0.938  | 3.24   |
| LOC389936 | 3.209  | 0      |
| LOC389948 | 2.459  | 0.44   |
| LOC389963 | 1.536  | 0      |
| LOC389970 | 1.01   | 4.17   |
| LOC389976 | 1.116  | 0.15   |
| LOC389990 | 0.796  | 7.72   |
| LOC389992 | 0.755  | 0      |
| LOC389997 | 26.293 | 0      |
| LOC390003 | 48.895 | 0      |
| LOC390006 | 0.837  | 0.6    |
| LOC390007 | 2.623  | 3.54   |
| LOC390029 | 2.321  | 0.14   |
| LOC390031 | 0.585  | 0      |
| LOC390033 | 0.585  | 0      |
| LOC390084 | 0.942  | 0      |
| LOC390098 | 0.994  | 0      |
| LOC390099 | 0.966  | 0      |
| LOC390101 | 6.401  | 0      |
| LOC390102 | 1.885  | 0.81   |

|           |        |        |
|-----------|--------|--------|
| LOC390107 | 0.402  | 250.82 |
| LOC390110 | 1.82   | 0      |
| LOC390158 | 4.513  | 0.41   |
| LOC390183 | 0.843  | 7.29   |
| LOC390203 | 0.953  | 0.53   |
| LOC390205 | 1.078  | 0      |
| LOC390206 | 0.907  | 0.37   |
| LOC390211 | 0.827  | 0      |
| LOC390213 | 4.584  | 0.38   |
| LOC390218 | 0.456  | 1.11   |
| LOC390228 | 0.8    | 0.1    |
| LOC390231 | 1.353  | 0      |
| LOC390233 | 6.505  | 0      |
| LOC390239 | 0.465  | 7.61   |
| LOC390243 | 0.732  | 0      |
| LOC390245 | 1.494  | 0      |
| LOC390250 | 0.633  | 9.59   |
| LOC390251 | 0.988  | 3.58   |
| LOC390255 | 0.984  | 10.1   |
| LOC390259 | 1.74   | 0      |
| LOC390282 | 0.618  | 0.27   |
| LOC390285 | 0.522  | 0.16   |
| LOC390294 | 0.941  | 3.31   |
| LOC390297 | 1.419  | 0.06   |
| LOC390298 | 1.218  | 1.66   |
| LOC390299 | 0.189  | 1.78   |
| LOC390301 | 1.113  | 0.08   |
| LOC390306 | 1.708  | 0.2    |
| LOC390308 | 0.632  | 0.13   |
| LOC390311 | 0.813  | 0.83   |
| LOC390314 | 0.518  | 4.07   |
| LOC390332 | 5.651  | 0.03   |
| LOC390335 | 0.483  | 14.13  |
| LOC390338 | 44.075 | 0      |
| LOC390340 | 3.836  | 0      |
| LOC390345 | 0.73   | 3.12   |
| LOC390352 | 0.24   | 0      |
| LOC390354 | 10.686 | 59.72  |
| LOC390358 | 3.585  | 0      |
| LOC390363 | 11.7   | 0.8    |
| LOC390364 | 0.201  | 1.67   |
| LOC390378 | 0.485  | 0      |
| LOC390394 | 4.86   | 3.52   |
| LOC390402 | 0.888  | 1.33   |
| LOC390403 | 0.546  | 0.15   |
| LOC390407 | 1.212  | 11.39  |
| LOC390411 | 0.871  | 0.48   |
| LOC390413 | 0.805  | 0.42   |
| LOC390414 | 1.279  | 0      |
| LOC390415 | 42.753 | 0.41   |

|           |         |       |
|-----------|---------|-------|
| LOC390418 | 1.302   | 0     |
| LOC390419 | 0.497   | 0.51  |
| LOC390421 | 0.417   | 0     |
| LOC390424 | 0.411   | 2.05  |
| LOC390427 | 1.854   | 0     |
| LOC390470 | 1.444   | 0.06  |
| LOC390472 | 0.879   | 0     |
| LOC390482 | 0.936   | 0     |
| LOC390483 | 13.657  | 0     |
| LOC390501 | 1.09    | 0.62  |
| LOC390503 | 3.82    | 0.75  |
| LOC390530 | 0.579   | 0     |
| LOC390557 | 2.682   | 0.12  |
| LOC390561 | 92.435  | 0.24  |
| LOC390569 | 170.266 | 0     |
| LOC390572 | 0.664   | 0.13  |
| LOC390576 | 3.807   | 0.08  |
| LOC390578 | 0.941   | 3.85  |
| LOC390580 | 5.404   | 0.66  |
| LOC390581 | 0.575   | 0     |
| LOC390586 | 1.558   | 0.65  |
| LOC390588 | 30.566  | 0.2   |
| LOC390595 | 1.692   | 0.7   |
| LOC390596 | 4.988   | 0.36  |
| LOC390597 | 4.414   | 0     |
| LOC390600 | 0.944   | 0.36  |
| LOC390601 | 1.526   | 0     |
| LOC390610 | 11.883  | 0.18  |
| LOC390612 | 1.338   | 113.7 |
| LOC390614 | 1.076   | 0     |
| LOC390616 | 2.21    | 0     |
| LOC390617 | 1.302   | 0.9   |
| LOC390618 | 0.732   | 0.12  |
| LOC390627 | 22.313  | 0     |
| LOC390634 | 1.292   | 0     |
| LOC390637 | 1.894   | 0.36  |
| LOC390638 | 22.365  | 0.04  |
| LOC390641 | 0.711   | 0.12  |
| LOC390643 | 8.031   | 0.18  |
| LOC390660 | 4.455   | 0     |
| LOC390667 | 1.422   | 0     |
| LOC390671 | 0.583   | 56.5  |
| LOC390705 | 0.767   | 0     |
| LOC390712 | 0.558   | 0     |
| LOC390714 | 0.6     | 0     |
| LOC390729 | 0.356   | 0.94  |
| LOC390730 | 0.826   | 2.45  |
| LOC390732 | 27.059  | 0     |
| LOC390738 | 1.161   | 0     |
| LOC390739 | 0.304   | 4.44  |

|           |        |       |
|-----------|--------|-------|
| LOC390748 | 0.87   | 0.29  |
| LOC390760 | 4.377  | 0     |
| LOC390791 | 0.491  | 0.52  |
| LOC390806 | 0.615  | 1.23  |
| LOC390811 | 0.201  | 0     |
| LOC390829 | 0.585  | 0     |
| LOC390831 | 0.738  | 0.11  |
| LOC390834 | 5.146  | 0     |
| LOC390843 | 19.97  | 0     |
| LOC390844 | 1.483  | 9.83  |
| LOC390848 | 0.413  | 0.41  |
| LOC390856 | 0.405  | 0     |
| LOC390857 | 0.839  | 0.1   |
| LOC390860 | 2.191  | 0.38  |
| LOC390861 | 1.121  | 0.82  |
| LOC390876 | 0.321  | 1.84  |
| LOC390877 | 0.576  | 0     |
| LOC390904 | 10.187 | 0.03  |
| LOC390924 | 3.314  | 2.34  |
| LOC390930 | 15.501 | 0     |
| LOC390937 | 1.065  | 0     |
| LOC390940 | 1.124  | 4.57  |
| LOC390948 | 0.574  | 0     |
| LOC390949 | 0.437  | 0     |
| LOC390956 | 0.561  | 0     |
| LOC390988 | 2.244  | 0     |
| LOC390993 | 2.047  | 0.33  |
| LOC390996 | 6.563  | 0     |
| LOC390997 | 2.695  | 2.03  |
| LOC390998 | 0.852  | 0.3   |
| LOC391012 | 0.371  | 12.49 |
| LOC391019 | 0.492  | 0.69  |
| LOC391020 | 0.402  | 0.63  |
| LOC391025 | 0.579  | 0     |
| LOC391026 | 15.15  | 0.1   |
| LOC391033 | 2.451  | 0.14  |
| LOC391037 | 0.675  | 0     |
| LOC391039 | 0.939  | 17.94 |
| LOC391040 | 7.039  | 0.08  |
| LOC391044 | 0.819  | 3.3   |
| LOC391048 | 1.911  | 0.27  |
| LOC391051 | 21.976 | 0     |
| LOC391053 | 0.7    | 6.26  |
| LOC391069 | 1.003  | 0.76  |
| LOC391073 | 5.124  | 0.03  |
| LOC391075 | 0.993  | 0.17  |
| LOC391076 | 7.706  | 0     |
| LOC391077 | 1.006  | 1.43  |
| LOC391081 | 9.525  | 0     |
| LOC391092 | 1.409  | 0     |

|           |        |       |
|-----------|--------|-------|
| LOC391099 | 63.316 | 0.01  |
| LOC391102 | 3.802  | 3.06  |
| LOC391106 | 0.773  | 0     |
| LOC391126 | 0.438  | 1.15  |
| LOC391130 | 0.415  | 3.04  |
| LOC391132 | 6.913  | 0.01  |
| LOC391135 | 1.413  | 17.05 |
| LOC391136 | 3.335  | 0.63  |
| LOC391137 | 12.585 | 0     |
| LOC391139 | 20.818 | 0.26  |
| LOC391140 | 0.647  | 0.26  |
| LOC391142 | 2.708  | 0     |
| LOC391151 | 0.37   | 0.91  |
| LOC391155 | 1.614  | 0     |
| LOC391157 | 0.409  | 0.61  |
| LOC391158 | 1.377  | 0.98  |
| LOC391160 | 0.547  | 2.77  |
| LOC391162 | 3.591  | 0     |
| LOC391168 | 0.817  | 0.31  |
| LOC391171 | 3.411  | 0.03  |
| LOC391179 | 1.425  | 0     |
| LOC391181 | 12.91  | 0.03  |
| LOC391183 | 19.626 | 0     |
| LOC391205 | 1.101  | 0     |
| LOC391230 | 6.335  | 0.02  |
| LOC391239 | 9.186  | 0     |
| LOC391242 | 0.678  | 0     |
| LOC391247 | 0.564  | 1.5   |
| LOC391256 | 1.348  | 0     |
| LOC391258 | 3.898  | 0     |
| LOC391265 | 0.126  | 0     |
| LOC391267 | 4.393  | 0.02  |
| LOC391269 | 0.512  | 0.16  |
| LOC391271 | 1.219  | 0     |
| LOC391273 | 0.736  | 5.27  |
| LOC391276 | 1.919  | 0.08  |
| LOC391282 | 0.501  | 0.51  |
| LOC391322 | 0.569  | 1.18  |
| LOC391334 | 1.212  | 1.12  |
| LOC391337 | 5.122  | 0     |
| LOC391343 | 0.648  | 0     |
| LOC391349 | 17.805 | 0.53  |
| LOC391356 | 0.572  | 50.81 |
| LOC391358 | 0.59   | 35.55 |
| LOC391359 | 0.297  | 2.27  |
| LOC391364 | 0.957  | 0.08  |
| LOC391367 | 1.007  | 1.17  |
| LOC391370 | 0.431  | 16.42 |
| LOC391378 | 9.357  | 0.05  |
| LOC391383 | 1.268  | 0.2   |

|           |        |      |
|-----------|--------|------|
| LOC391387 | 0.874  | 0    |
| LOC391405 | 2.127  | 0    |
| LOC391428 | 12.023 | 0    |
| LOC391429 | 0.381  | 0    |
| LOC391436 | 3.935  | 0    |
| LOC391444 | 10.888 | 0    |
| LOC391448 | 9.813  | 0.04 |
| LOC391453 | 4.554  | 0    |
| LOC391458 | 1.279  | 0    |
| LOC391462 | 0.873  | 0.19 |
| LOC391465 | 0.581  | 0.87 |
| LOC391467 | 2.242  | 0.26 |
| LOC391470 | 1.242  | 1.56 |
| LOC391472 | 18.808 | 0.01 |
| LOC391485 | 5.604  | 0    |
| LOC391490 | 5.591  | 0.03 |
| LOC391491 | 78.835 | 0.02 |
| LOC391504 | 0.509  | 1.16 |
| LOC391508 | 1.392  | 0    |
| LOC391511 | 0.561  | 1.95 |
| LOC391524 | 1.598  | 1.53 |
| LOC391526 | 1.004  | 0.25 |
| LOC391530 | 56.357 | 0    |
| LOC391532 | 0.594  | 0.14 |
| LOC391533 | 1.434  | 0.18 |
| LOC391539 | 0.695  | 0.37 |
| LOC391540 | 1.824  | 4.06 |
| LOC391541 | 0.493  | 0.17 |
| LOC391552 | 5.024  | 0.03 |
| LOC391556 | 0.739  | 0.11 |
| LOC391559 | 0.7    | 5.66 |
| LOC391560 | 0.406  | 1.04 |
| LOC391562 | 5.382  | 0.74 |
| LOC391566 | 7.231  | 0.01 |
| LOC391578 | 3.984  | 0.08 |
| LOC391584 | 1.276  | 0    |
| LOC391587 | 1.799  | 0.09 |
| LOC391589 | 1.363  | 0    |
| LOC391592 | 1.792  | 5.03 |
| LOC391595 | 0.406  | 3.53 |
| LOC391598 | 0.895  | 0.56 |
| LOC391600 | 0.887  | 0    |
| LOC391603 | 0.872  | 0    |
| LOC391609 | 1.209  | 0    |
| LOC391636 | 1.039  | 4.54 |
| LOC391640 | 4.411  | 0.03 |
| LOC391642 | 1.005  | 0.17 |
| LOC391647 | 1.284  | 0    |
| LOC391648 | 70.234 | 0    |
| LOC391655 | 0.584  | 0.29 |

|           |         |       |
|-----------|---------|-------|
| LOC391656 | 0.436   | 0.58  |
| LOC391657 | 4.435   | 0.59  |
| LOC391670 | 1.188   | 0.78  |
| LOC391672 | 1.024   | 1.81  |
| LOC391674 | 1.028   | 0.08  |
| LOC391679 | 0.846   | 0.2   |
| LOC391681 | 2.059   | 0.53  |
| LOC391686 | 0.691   | 2.92  |
| LOC391689 | 15.944  | 0.01  |
| LOC391696 | 3.792   | 2.15  |
| LOC391697 | 9.503   | 0     |
| LOC391698 | 8.095   | 0.14  |
| LOC391701 | 0.415   | 1.82  |
| LOC391703 | 25.764  | 0     |
| LOC391706 | 1.892   | 0.89  |
| LOC391707 | 0.394   | 0     |
| LOC391710 | 2.848   | 0     |
| LOC391711 | 7.343   | 0.03  |
| LOC391713 | 7.44    | 0     |
| LOC391718 | 1.392   | 0.48  |
| LOC391719 | 0.591   | 1.14  |
| LOC391722 | 1.134   | 0.74  |
| LOC391738 | 0.465   | 0.55  |
| LOC391739 | 1.596   | 8.65  |
| LOC391741 | 1.132   | 19.42 |
| LOC391742 | 0.552   | 0     |
| LOC391744 | 0.443   | 0     |
| LOC391746 | 0.597   | 0     |
| LOC391747 | 0.597   | 0     |
| LOC391749 | 0.597   | 0     |
| LOC391761 | 0.597   | 0     |
| LOC391763 | 0.597   | 0     |
| LOC391764 | 0.756   | 0     |
| LOC391765 | 0.443   | 0     |
| LOC391766 | 0.597   | 0     |
| LOC391767 | 0.594   | 0     |
| LOC391768 | 0.596   | 0     |
| LOC391769 | 0.411   | 0     |
| LOC391771 | 0.927   | 0.28  |
| LOC391774 | 0.637   | 1.33  |
| LOC391777 | 0.863   | 40.71 |
| LOC391798 | 33.177  | 0     |
| LOC391803 | 1.234   | 0     |
| LOC391804 | 0.969   | 2.08  |
| LOC391807 | 210.938 | 0     |
| LOC391810 | 4.787   | 0.18  |
| LOC391811 | 1.422   | 5.98  |
| LOC391813 | 1.943   | 0     |
| LOC391819 | 1.322   | 0     |
| LOC391824 | 6.396   | 0     |



|           |         |         |
|-----------|---------|---------|
| LOC391825 | 0.473   | 0.71    |
| LOC391827 | 15.913  | 0       |
| LOC391828 | 0.406   | 1352.34 |
| LOC391833 | 0.563   | 1.5     |
| LOC391834 | 0.718   | 0.12    |
| LOC391836 | 11.373  | 0       |
| LOC391844 | 59.324  | 0.03    |
| LOC391845 | 0.451   | 1.31    |
| LOC391847 | 42.237  | 0.04    |
| LOC391849 | 25.689  | 7.1     |
| LOC391850 | 7.28    | 0.03    |
| LOC391859 | 0.591   | 0       |
| LOC392005 | 54.437  | 0.01    |
| LOC392008 | 0.38    | 0.66    |
| LOC392027 | 2.404   | 1.97    |
| LOC392030 | 0.706   | 1.55    |
| LOC392100 | 1.321   | 0       |
| LOC392145 | 11.753  | 0.01    |
| LOC392180 | 0.999   | 0.25    |
| LOC392181 | 1.057   | 0       |
| LOC392187 | 1.201   | 0       |
| LOC392188 | 1.593   | 0       |
| LOC392193 | 0.647   | 0.91    |
| LOC392196 | 1.2     | 0       |
| LOC392197 | 1.593   | 0       |
| LOC392206 | 0.659   | 11.76   |
| LOC392209 | 3.616   | 0.09    |
| LOC392214 | 1.285   | 0       |
| LOC392217 | 2.682   | 0       |
| LOC392221 | 0.501   | 0.34    |
| LOC392222 | 0.267   | 0       |
| LOC392225 | 1.373   | 0       |
| LOC392226 | 43.977  | 0.07    |
| LOC392227 | 0.494   | 0       |
| LOC392232 | 92.212  | 0       |
| LOC392242 | 3.56    | 0       |
| LOC392262 | 0.246   | 0       |
| LOC392264 | 51.675  | 0       |
| LOC392265 | 0.93    | 1.18    |
| LOC392266 | 6.831   | 0.76    |
| LOC392267 | 2.234   | 0.18    |
| LOC392268 | 3.096   | 0       |
| LOC392271 | 0.408   | 4.75    |
| LOC392281 | 0.985   | 6.41    |
| LOC392282 | 0.613   | 7.01    |
| LOC392285 | 14.682  | 0.02    |
| LOC392288 | 1.206   | 0.7     |
| LOC392292 | 1.608   | 0       |
| LOC392298 | 273.231 | 0       |
| LOC392301 | 12.459  | 0.05    |

|           |        |       |
|-----------|--------|-------|
| LOC392310 | 0.842  | 0     |
| LOC392322 | 139.89 | 0     |
| LOC392334 | 3.757  | 0     |
| LOC392335 | 8.844  | 0     |
| LOC392343 | 14.007 | 0     |
| LOC392352 | 4.38   | 0.02  |
| LOC392358 | 0.741  | 21.26 |
| LOC392364 | 2.313  | 0     |
| LOC392368 | 7.673  | 0     |
| LOC392371 | 4.083  | 0     |
| LOC392374 | 1.015  | 0     |
| LOC392382 | 23.47  | 0.06  |
| LOC392387 | 1.3    | 3.63  |
| LOC392424 | 0.61   | 63.93 |
| LOC392425 | 0.455  | 0     |
| LOC392426 | 2.084  | 0.73  |
| LOC392435 | 4.469  | 0     |
| LOC392436 | 0.439  | 0     |
| LOC392437 | 0.743  | 49.65 |
| LOC392439 | 0.691  | 0     |
| LOC392440 | 0.951  | 0     |
| LOC392442 | 22.272 | 0.06  |
| LOC392443 | 6.605  | 0     |
| LOC392451 | 4.765  | 0.3   |
| LOC392452 | 0.86   | 0     |
| LOC392454 | 0.783  | 5.59  |
| LOC392456 | 1.631  | 4.28  |
| LOC392459 | 5.697  | 0     |
| LOC392465 | 0.474  | 0     |
| LOC392473 | 33.6   | 0     |
| LOC392477 | 0.966  | 0.18  |
| LOC392479 | 51.495 | 0     |
| LOC392481 | 1.749  | 1.54  |
| LOC392485 | 0.987  | 1.11  |
| LOC392489 | 0.574  | 0     |
| LOC392497 | 0.761  | 8.85  |
| LOC392501 | 0.436  | 0.58  |
| LOC392505 | 0.863  | 0.09  |
| LOC392508 | 1.886  | 6.07  |
| LOC392510 | 1.014  | 0.08  |
| LOC392516 | 13.966 | 0     |
| LOC392520 | 0.606  | 0     |
| LOC392522 | 4.479  | 0.15  |
| LOC392525 | 0.942  | 0     |
| LOC392528 | 3.231  | 0     |
| LOC392529 | 0.513  | 0     |
| LOC392536 | 1.953  | 0     |
| LOC392538 | 0.914  | 0.19  |
| LOC392539 | 3.659  | 0.12  |
| LOC392542 | 0.534  | 0     |

|           |         |       |
|-----------|---------|-------|
| LOC392543 | 1.267   | 1.46  |
| LOC392545 | 0.629   | 0     |
| LOC392547 | 5.969   | 0.48  |
| LOC392552 | 1.431   | 0     |
| LOC392555 | 1.124   | 0     |
| LOC392556 | 4.331   | 0     |
| LOC392557 | 0.591   | 57.58 |
| LOC392563 | 1.701   | 0     |
| LOC392597 | 2.122   | 0     |
| LOC392603 | 5.119   | 0     |
| LOC392617 | 5.908   | 24.71 |
| LOC392631 | 2.349   | 0     |
| LOC392635 | 5.56    | 0     |
| LOC392713 | 4.562   | 0.06  |
| LOC392748 | 0.496   | 3.06  |
| LOC392781 | 1.798   | 1.08  |
| LOC392787 | 11.331  | 0.01  |
| LOC392843 | 29.503  | 0     |
| LOC392871 | 1.22    | 0     |
| LOC392878 | 0.38    | 0     |
| LOC392900 | 2.404   | 0     |
| LOC392979 | 0.501   | 0     |
| LOC392982 | 0.585   | 0     |
| LOC393062 | 11.746  | 0     |
| LOC393076 | 163.618 | 0     |
| LOC393078 | 31.518  | 0     |
| LOC399655 | 3.966   | 1.1   |
| LOC399706 | 2.381   | 0     |
| LOC399744 | 3.711   | 0.91  |
| LOC399748 | 1.633   | 14.08 |
| LOC399761 | 1.48    | 0.06  |
| LOC399774 | 4.645   | 0.05  |
| LOC399783 | 19.049  | 0     |
| LOC399804 | 1.08    | 11.15 |
| LOC399815 | 1.419   | 0.12  |
| LOC399818 | 2.579   | 3.36  |
| LOC399829 | 0.723   | 0     |
| LOC399839 | 2.682   | 0     |
| LOC399881 | 50.362  | 0.01  |
| LOC399888 | 1.72    | 4.36  |
| LOC399898 | 4.292   | 0     |
| LOC399900 | 1.697   | 0     |
| LOC399937 | 2.05    | 0     |
| LOC399939 | 1.651   | 0     |
| LOC399940 | 2.05    | 0     |
| LOC399942 | 1.616   | 10.58 |
| LOC399947 | 2.338   | 0     |
| LOC399950 | 1.082   | 0     |
| LOC399957 | 4.476   | 0     |
| LOC399965 | 1.705   | 0     |

|           |        |       |
|-----------|--------|-------|
| LOC399988 | 4.189  | 0.22  |
| LOC399994 | 3.966  | 3.56  |
| LOC400011 | 3.628  | 6.83  |
| LOC400013 | 1.746  | 6.17  |
| LOC400026 | 14.377 | 0.01  |
| LOC400027 | 2.202  | 14.88 |
| LOC400036 | 2.585  | 4.34  |
| LOC400058 | 1.294  | 0.45  |
| LOC400061 | 1.003  | 1.76  |
| LOC400064 | 0.736  | 29.76 |
| LOC400094 | 2.463  | 0.03  |
| LOC400099 | 2.046  | 1.52  |
| LOC400120 | 2.876  | 0     |
| LOC400126 | 3.362  | 26.14 |
| LOC400129 | 1.3    | 6.22  |
| LOC400141 | 0.934  | 0.72  |
| LOC400174 | 1.175  | 0.79  |
| LOC400236 | 1.882  | 0.36  |
| LOC400258 | 1.847  | 0     |
| LOC400347 | 1.118  | 2.41  |
| LOC400352 | 14.013 | 0.01  |
| LOC400385 | 20.125 | 0.04  |
| LOC400389 | 0.651  | 0     |
| LOC400403 | 31.195 | 0.33  |
| LOC400406 | 24.082 | 0.06  |
| LOC400419 | 46.571 | 0.01  |
| LOC400446 | 6.363  | 0.47  |
| LOC400451 | 2.627  | 0.93  |
| LOC400455 | 0.821  | 4.31  |
| LOC400456 | 0.931  | 0     |
| LOC400464 | 1.931  | 1.88  |
| LOC400499 | 3.552  | 0     |
| LOC400506 | 3.817  | 6.76  |
| LOC400553 | 0.703  | 0     |
| LOC400566 | 1.779  | 2.75  |
| LOC400578 | 4.704  | 0     |
| LOC400581 | 1.345  | 1.06  |
| LOC400592 | 12.175 | 2.49  |
| LOC400652 | 0.741  | 3.87  |
| LOC400657 | 2.399  | 2.6   |
| LOC400686 | 5.302  | 0.02  |
| LOC400696 | 2.562  | 0     |
| LOC400707 | 1.991  | 1.44  |
| LOC400723 | 1.289  | 0     |
| LOC400750 | 4.296  | 1.81  |
| LOC400752 | 1.71   | 0.98  |
| LOC400756 | 1.277  | 0.2   |
| LOC400769 | 0.912  | 0.65  |
| LOC400796 | 1.399  | 0     |
| LOC400831 | 1.604  | 0     |

|           |        |       |
|-----------|--------|-------|
| LOC400856 | 2.201  | 0     |
| LOC400879 | 4.778  | 0.7   |
| LOC400891 | 3.226  | 0     |
| LOC400924 | 2.272  | 3.34  |
| LOC400927 | 39.945 | 0.15  |
| LOC400950 | 3.715  | 0     |
| LOC400958 | 3.029  | 0     |
| LOC400960 | 0.997  | 1.35  |
| LOC400963 | 0.973  | 3.47  |
| LOC400965 | 2.617  | 0     |
| LOC400968 | 4.637  | 0     |
| LOC400986 | 2.29   | 0.15  |
| LOC400987 | 1.298  | 0.13  |
| LOC401007 | 2.163  | 0.08  |
| LOC401010 | 2.723  | 3.65  |
| LOC401013 | 2.242  | 0     |
| LOC401018 | 2.444  | 0     |
| LOC401021 | 1.816  | 0     |
| LOC401052 | 1.897  | 0.66  |
| LOC401068 | 2.06   | 0.7   |
| LOC401072 | 4.064  | 0     |
| LOC401074 | 1.008  | 0.75  |
| LOC401076 | 2.157  | 7.93  |
| LOC401089 | 4.075  | 0     |
| LOC401097 | 0.759  | 0     |
| LOC401098 | 2.614  | 0     |
| LOC401115 | 0.464  | 7.63  |
| LOC401127 | 1.403  | 1.68  |
| LOC401131 | 6.056  | 0     |
| LOC401137 | 3.072  | 0     |
| LOC401152 | 1.92   | 39.61 |
| LOC401180 | 0.96   | 1.05  |
| LOC401218 | 1.738  | 0.43  |
| LOC401220 | 2.891  | 0     |
| LOC401222 | 2.526  | 0     |
| LOC401233 | 2.851  | 0.44  |
| LOC401242 | 2.785  | 0     |
| LOC401252 | 10.372 | 0.01  |
| LOC401280 | 3.836  | 0     |
| LOC401286 | 4.518  | 0.69  |
| LOC401296 | 2.846  | 0.03  |
| LOC401308 | 4.548  | 10.06 |
| LOC401316 | 4.972  | 13.17 |
| LOC401317 | 2.288  | 0     |
| LOC401321 | 7.464  | 0.73  |
| LOC401329 | 9.261  | 0     |
| LOC401357 | 6.708  | 0.03  |
| LOC401393 | 0.681  | 0.13  |
| LOC401397 | 2.302  | 2.6   |
| LOC401398 | 4.294  | 0.06  |

|           |        |       |
|-----------|--------|-------|
| LOC401399 | 7.304  | 0.06  |
| LOC401410 | 5.85   | 0     |
| LOC401431 | 5.842  | 0.02  |
| LOC401433 | 5.816  | 8.02  |
| LOC401442 | 1.827  | 0     |
| LOC401447 | 1.593  | 0     |
| LOC401497 | 1.966  | 0     |
| LOC401498 | 3.581  | 0     |
| LOC401525 | 0.372  | 0.23  |
| LOC401533 | 2.672  | 1.33  |
| LOC401537 | 0.887  | 1.14  |
| LOC401565 | 1.124  | 2.69  |
| LOC401577 | 1.023  | 1.24  |
| LOC401602 | 2.798  | 3.98  |
| LOC401629 | 0.462  | 0     |
| LOC401630 | 0.46   | 0     |
| LOC401640 | 0.801  | 2     |
| LOC401646 | 2.883  | 0     |
| LOC401648 | 1.233  | 0     |
| LOC401650 | 0.684  | 0     |
| LOC401676 | 48.693 | 0.05  |
| LOC401677 | 0.495  | 1.02  |
| LOC401679 | 23.596 | 0.05  |
| LOC401703 | 1.032  | 3.43  |
| LOC401705 | 0.755  | 0     |
| LOC401708 | 1.121  | 0.3   |
| LOC401717 | 15.768 | 0.56  |
| LOC401720 | 2.436  | 0.03  |
| LOC401721 | 3.363  | 0     |
| LOC401725 | 0.86   | 0.49  |
| LOC401730 | 1.448  | 0     |
| LOC401744 | 1.279  | 6.06  |
| LOC401767 | 91.04  | 0.02  |
| LOC401770 | 0.363  | 11.14 |
| LOC401772 | 9.638  | 0.01  |
| LOC401777 | 19.515 | 0.05  |
| LOC401805 | 4.121  | 0.18  |
| LOC401817 | 0.515  | 0.49  |
| LOC401822 | 12.755 | 0.02  |
| LOC401825 | 0.895  | 1.79  |
| LOC401847 | 0.516  | 0     |
| LOC401859 | 0.501  | 0.34  |
| LOC401863 | 0.664  | 90.7  |
| LOC401864 | 1.768  | 0     |
| LOC401865 | 2.925  | 0.23  |
| LOC401895 | 0.375  | 0.22  |
| LOC401898 | 3.381  | 0.03  |
| LOC401904 | 0.964  | 2.79  |
| LOC401911 | 3.951  | 0.34  |
| LOC401913 | 0.576  | 0     |

|           |        |        |
|-----------|--------|--------|
| LOC401914 | 1.304  | 0.39   |
| LOC401945 | 0.702  | 0      |
| LOC401957 | 0.618  | 25.9   |
| LOC401959 | 0.861  | 0      |
| LOC401960 | 1.892  | 0.13   |
| LOC401974 | 0.898  | 1.22   |
| LOC401975 | 0.846  | 0.5    |
| LOC401980 | 1.224  | 0      |
| LOC401981 | 3.976  | 0.44   |
| LOC401982 | 0.956  | 0.71   |
| LOC402026 | 0.604  | 8.65   |
| LOC402036 | 1.089  | 0      |
| LOC402057 | 0.54   | 395.45 |
| LOC402069 | 0.44   | 0.19   |
| LOC402076 | 8.157  | 0      |
| LOC402093 | 1.281  | 0.39   |
| LOC402096 | 26.624 | 0.06   |
| LOC402100 | 34.743 | 0      |
| LOC402102 | 6.269  | 0      |
| LOC402110 | 2.606  | 0      |
| LOC402112 | 1.195  | 1.13   |
| LOC402116 | 4.257  | 0.95   |
| LOC402117 | 1.231  | 0      |
| LOC402120 | 0.342  | 0.49   |
| LOC402122 | 0.156  | 0      |
| LOC402123 | 0.532  | 0.16   |
| LOC402125 | 4.725  | 0.02   |
| LOC402134 | 7.996  | 0      |
| LOC402143 | 1.943  | 4.55   |
| LOC402145 | 0.351  | 0      |
| LOC402146 | 1.429  | 1.65   |
| LOC402149 | 7.279  | 32.41  |
| LOC402150 | 0.762  | 8.73   |
| LOC402152 | 0.74   | 0.34   |
| LOC402164 | 1.593  | 0      |
| LOC402175 | 0.42   | 14.24  |
| LOC402176 | 1.763  | 0.14   |
| LOC402182 | 2.014  | 0.04   |
| LOC402184 | 0.398  | 0.42   |
| LOC402191 | 3.514  | 1.06   |
| LOC402192 | 0.711  | 0.71   |
| LOC402198 | 56.663 | 0      |
| LOC402199 | 0.597  | 0      |
| LOC402207 | 0.597  | 0      |
| LOC402213 | 0.709  | 0.36   |
| LOC402214 | 0.616  | 1.78   |
| LOC402216 | 1.277  | 22.89  |
| LOC402217 | 0.546  | 2.16   |
| LOC402219 | 38.162 | 0.54   |
| LOC402221 | 1.105  | 1.44   |

|           |         |        |
|-----------|---------|--------|
| LOC402222 | 1.966   | 0.47   |
| LOC402226 | 12.371  | 0.85   |
| LOC402229 | 1.911   | 1.76   |
| LOC402230 | 3.392   | 0.48   |
| LOC402232 | 0.858   | 0      |
| LOC402233 | 4.701   | 0.05   |
| LOC402269 | 1.506   | 0      |
| LOC402273 | 32.566  | 0      |
| LOC402279 | 1.134   | 0      |
| LOC402287 | 0.897   | 0.47   |
| LOC402329 | 1.201   | 0      |
| LOC402342 | 3.247   | 1.4    |
| LOC402359 | 109.665 | 0.16   |
| LOC402360 | 0.902   | 0.09   |
| LOC402375 | 0.291   | 134.89 |
| LOC402377 | 1.275   | 0.4    |
| LOC402382 | 0.675   | 0      |
| LOC402394 | 2.284   | 0.29   |
| LOC402397 | 3.379   | 1.34   |
| LOC402408 | 3.195   | 0.5    |
| LOC402420 | 11.021  | 0.88   |
| LOC402422 | 1.334   | 0.06   |
| LOC402425 | 1.358   | 0.87   |
| LOC402429 | 31.683  | 0      |
| LOC402505 | 20.367  | 0.04   |
| LOC402509 | 4.547   | 0      |
| LOC402569 | 3.207   | 0.1    |
| LOC402573 | 2.008   | 3.53   |
| LOC402634 | 0.762   | 0      |
| LOC402635 | 6.842   | 0      |
| LOC402641 | 15.719  | 0.05   |
| LOC402643 | 1.384   | 0.42   |
| LOC402644 | 0.992   | 0      |
| LOC402676 | 0.524   | 0.16   |
| LOC402679 | 1.884   | 0      |
| LOC402682 | 1.914   | 1.05   |
| LOC402716 | 17.088  | 0.02   |
| LOC407835 | 3.474   | 9.26   |
| LOC414751 | 4.634   | 0      |
| LOC414752 | 7.767   | 0      |
| LOC414753 | 10.816  | 0      |
| LOC414754 | 1.909   | 3.13   |
| LOC432369 | 0.368   | 111.93 |
| LOC4328   | 1.938   | 2.13   |
| LOC439945 | 5.892   | 0      |
| LOC439949 | 1.403   | 1.92   |
| LOC439950 | 0.554   | 0      |
| LOC439951 | 1.37    | 0.06   |
| LOC439953 | 0.71    | 0.36   |
| LOC439954 | 0.745   | 0.79   |



|           |        |        |
|-----------|--------|--------|
| LOC439957 | 0.435  | 0.2    |
| LOC439962 | 2.668  | 0.03   |
| LOC439985 | 2.57   | 0      |
| LOC439992 | 1.532  | 1.04   |
| LOC439994 | 2.672  | 2.87   |
| LOC440013 | 2.619  | 0      |
| LOC440014 | 2.682  | 0      |
| LOC440015 | 1.255  | 1.41   |
| LOC440017 | 2.671  | 0      |
| LOC440027 | 0.546  | 0.62   |
| LOC440031 | 0.854  | 0      |
| LOC440040 | 1.828  | 0      |
| LOC440041 | 7.941  | 0.01   |
| LOC440043 | 2.359  | 0.36   |
| LOC440055 | 0.559  | 761.29 |
| LOC440059 | 15.137 | 0      |
| LOC440061 | 6.817  | 0      |
| LOC440063 | 0.704  | 0.24   |
| LOC440067 | 7.522  | 0.15   |
| LOC440083 | 1.161  | 0      |
| LOC440087 | 2.104  | 0      |
| LOC440093 | 1.057  | 74.75  |
| LOC440104 | 3.47   | 10.61  |
| LOC440125 | 2.977  | 0.31   |
| LOC440131 | 0.696  | 0      |
| LOC440142 | 4.559  | 0.13   |
| LOC440157 | 2.761  | 0.79   |
| LOC440180 | 1.817  | 5.7    |
| LOC440181 | 0.827  | 0      |
| LOC440224 | 24.544 | 0      |
| LOC440225 | 28.167 | 0      |
| LOC440233 | 2.44   | 0      |
| LOC440243 | 3.63   | 0      |
| LOC440248 | 5.7    | 4.94   |
| LOC440268 | 0.678  | 0      |
| LOC440278 | 12.014 | 0.34   |
| LOC440287 | 1.155  | 0      |
| LOC440292 | 0.984  | 0.09   |
| LOC440295 | 3.218  | 0      |
| LOC440296 | 0.491  | 0      |
| LOC440297 | 22.168 | 0      |
| LOC440300 | 19.781 | 0      |
| LOC440302 | 0.49   | 0      |
| LOC440304 | 17.066 | 0      |
| LOC440311 | 1.595  | 159.17 |
| LOC440313 | 3.846  | 0      |
| LOC440320 | 3.585  | 0      |
| LOC440330 | 0.71   | 0      |
| LOC440335 | 0.349  | 0      |
| LOC440337 | 1.919  | 0      |

|           |        |        |
|-----------|--------|--------|
| LOC440338 | 3.853  | 0      |
| LOC440345 | 7.602  | 0.48   |
| LOC440348 | 1.089  | 1.09   |
| LOC440350 | 1.474  | 0      |
| LOC440353 | 24.527 | 0.02   |
| LOC440354 | 42.485 | 0.04   |
| LOC440359 | 1.869  | 45.39  |
| LOC440361 | 0.537  | 0      |
| LOC440366 | 12.305 | 0      |
| LOC440386 | 3.886  | 0.13   |
| LOC440389 | 0.685  | 0      |
| LOC440396 | 1.637  | 0.67   |
| LOC440456 | 4.033  | 1.69   |
| LOC440459 | 4.881  | 0      |
| LOC440461 | 6.672  | 0.03   |
| LOC440487 | 0.523  | 1.29   |
| LOC440489 | 1.332  | 4.49   |
| LOC440490 | 0.189  | 28.08  |
| LOC440491 | 0.801  | 0.94   |
| LOC440498 | 0.678  | 10.68  |
| LOC440508 | 5.462  | 0      |
| LOC440511 | 0.984  | 2.74   |
| LOC440514 | 2.91   | 10.97  |
| LOC440518 | 8.905  | 0      |
| LOC440525 | 1.134  | 29.64  |
| LOC440551 | 1.968  | 307.07 |
| LOC440558 | 1.284  | 0      |
| LOC440563 | 0.753  | 0.67   |
| LOC440568 | 7.699  | 0      |
| LOC440570 | 2.52   | 0      |
| LOC440575 | 1.166  | 0.29   |
| LOC440577 | 1.06   | 7.16   |
| LOC440587 | 1.142  | 1.11   |
| LOC440589 | 0.899  | 1.96   |
| LOC440595 | 1.694  | 8.75   |
| LOC440597 | 0.527  | 0.16   |
| LOC440607 | 0.846  | 0      |
| LOC440700 | 1.228  | 0      |
| LOC440706 | 2.007  | 0      |
| LOC440731 | 0.392  | 2.57   |
| LOC440733 | 0.907  | 42.9   |
| LOC440737 | 0.444  | 64.7   |
| LOC440742 | 3.58   | 0      |
| LOC440748 | 4.345  | 0      |
| LOC440776 | 0.92   | 0      |
| LOC440786 | 0.321  | 0.79   |
| LOC440792 | 16.273 | 0.11   |
| LOC440795 | 3.55   | 0      |
| LOC440799 | 1.982  | 0      |
| LOC440804 | 6.105  | 0.09   |

|           |       |        |
|-----------|-------|--------|
| LOC440829 | 1.479 | 0      |
| LOC440836 | 1.722 | 0.2    |
| LOC440839 | 1.621 | 0      |
| LOC440871 | 0.456 | 0      |
| LOC440872 | 6.692 | 0      |
| LOC440888 | 1.338 | 0      |
| LOC440895 | 1.993 | 2.88   |
| LOC440896 | 4.387 | 0      |
| LOC440900 | 0.81  | 0.1    |
| LOC440902 | 4.748 | 0.03   |
| LOC440905 | 3.679 | 0      |
| LOC440917 | 1.77  | 46.12  |
| LOC440925 | 2.117 | 0      |
| LOC440926 | 1.059 | 5.17   |
| LOC440934 | 2.951 | 0      |
| LOC440944 | 3.119 | 0.03   |
| LOC440956 | 0.324 | 0      |
| LOC440973 | 1.573 | 1.34   |
| LOC440981 | 0.782 | 0      |
| LOC440991 | 0.829 | 482.96 |
| LOC440992 | 0.52  | 125.71 |
| LOC440993 | 2.734 | 1.33   |
| LOC440995 | 1.226 | 7.9    |
| LOC441005 | 1.145 | 0      |
| LOC441009 | 0.734 | 0      |
| LOC441013 | 0.945 | 2.76   |
| LOC441016 | 0.747 | 0.11   |
| LOC441018 | 0.888 | 0      |
| LOC441019 | 0.419 | 4.82   |
| LOC441026 | 3.086 | 0.16   |
| LOC441032 | 3.358 | 4.39   |
| LOC441034 | 0.891 | 29.02  |
| LOC441046 | 1.989 | 0.47   |
| LOC441052 | 1.47  | 0      |
| LOC441056 | 2.666 | 0.06   |
| LOC441061 | 2.576 | 0      |
| LOC441066 | 9.134 | 0      |
| LOC441070 | 1.513 | 0      |
| LOC441073 | 0.536 | 448.21 |
| LOC441081 | 6.769 | 0      |
| LOC441087 | 1.437 | 0.06   |
| LOC441089 | 1.546 | 4.3    |
| LOC441097 | 0.829 | 0      |
| LOC441098 | 4.424 | 0      |
| LOC441108 | 2.302 | 10.21  |
| LOC441114 | 0.382 | 32.42  |
| LOC441119 | 1.131 | 0      |
| LOC441120 | 1.692 | 0      |
| LOC441124 | 2.763 | 0.7    |
| LOC441131 | 0.677 | 0.63   |

|           |         |       |
|-----------|---------|-------|
| LOC441132 | 2.631   | 0.13  |
| LOC441133 | 76.736  | 0     |
| LOC441136 | 2.165   | 0     |
| LOC441150 | 0.552   | 13.73 |
| LOC441154 | 7.421   | 0.79  |
| LOC441155 | 6.151   | 0.59  |
| LOC441160 | 4.196   | 0     |
| LOC441161 | 0.681   | 0     |
| LOC441166 | 0.909   | 0.28  |
| LOC441177 | 2.064   | 0     |
| LOC441178 | 0.396   | 0.21  |
| LOC441179 | 2.718   | 0.56  |
| LOC441193 | 3.81    | 0.22  |
| LOC441208 | 3.648   | 0.53  |
| LOC441212 | 6.696   | 0.16  |
| LOC441218 | 1.52    | 0     |
| LOC441220 | 7.263   | 0.37  |
| LOC441228 | 15.524  | 0.45  |
| LOC441233 | 5.078   | 0     |
| LOC441238 | 2.626   | 1.09  |
| LOC441239 | 2.534   | 0.07  |
| LOC441241 | 0.396   | 0.42  |
| LOC441242 | 3.923   | 0.09  |
| LOC441251 | 2.132   | 0     |
| LOC441253 | 0.528   | 0.16  |
| LOC441257 | 4.048   | 0.44  |
| LOC441258 | 2.271   | 0     |
| LOC441259 | 1.982   | 0     |
| LOC441261 | 1.794   | 1.55  |
| LOC441268 | 4.702   | 0.02  |
| LOC441282 | 1.902   | 0     |
| LOC441294 | 4.71    | 0     |
| LOC441296 | 0.1     | 0     |
| LOC441314 | 1.954   | 0     |
| LOC441320 | 0.371   | 0     |
| LOC441323 | 1.954   | 0     |
| LOC441326 | 1.954   | 0     |
| LOC441344 | 0.408   | 16.31 |
| LOC441376 | 0.75    | 0     |
| LOC441377 | 0.452   | 0.37  |
| LOC441390 | 2.32    | 0     |
| LOC441410 | 1.372   | 0     |
| LOC441416 | 59.312  | 0     |
| LOC441420 | 8.374   | 0     |
| LOC441426 | 3.205   | 0     |
| LOC441440 | 130.003 | 0     |
| LOC441442 | 10.501  | 0     |
| LOC441448 | 0.675   | 0     |
| LOC441454 | 0.33    | 5.1   |
| LOC441455 | 3.761   | 0.24  |

|           |         |        |
|-----------|---------|--------|
| LOC441461 | 0.806   | 0.73   |
| LOC441476 | 1.198   | 0.07   |
| LOC441481 | 0.606   | 35.17  |
| LOC441484 | 1.99    | 0.25   |
| LOC441487 | 4.576   | 0.42   |
| LOC441489 | 0.715   | 0      |
| LOC441490 | 0.738   | 0      |
| LOC441493 | 2.386   | 0      |
| LOC441495 | 1.62    | 0      |
| LOC441505 | 1.632   | 16.62  |
| LOC441506 | 1.226   | 0.76   |
| LOC441511 | 0.6     | 1.54   |
| LOC441522 | 2.222   | 0.19   |
| LOC441528 | 1.203   | 0      |
| LOC441533 | 0.438   | 3.08   |
| LOC441546 | 0.588   | 1.15   |
| LOC441548 | 0.848   | 0      |
| LOC441550 | 3.444   | 3.28   |
| LOC441551 | 3.468   | 0      |
| LOC441553 | 18.995  | 0.01   |
| LOC441554 | 4.201   | 0      |
| LOC441568 | 0.384   | 0      |
| LOC441572 | 1.003   | 3.7    |
| LOC441581 | 2.078   | 5.31   |
| LOC441584 | 0.585   | 0      |
| LOC441592 | 0.961   | 0      |
| LOC441601 | 19.63   | 0.01   |
| LOC441609 | 3.228   | 0      |
| LOC441616 | 6.653   | 0      |
| LOC441617 | 1.737   | 0      |
| LOC441623 | 87.355  | 0.01   |
| LOC441630 | 0.378   | 1.56   |
| LOC441632 | 2.723   | 19.58  |
| LOC441641 | 0.586   | 0.86   |
| LOC441642 | 0.8     | 0.73   |
| LOC441643 | 0.365   | 0      |
| LOC441644 | 107.946 | 0.02   |
| LOC441654 | 21.299  | 0      |
| LOC441655 | 0.834   | 0.31   |
| LOC441662 | 0.744   | 0      |
| LOC441666 | 25.28   | 0      |
| LOC441687 | 51.352  | 0.03   |
| LOC441698 | 1.883   | 0      |
| LOC441711 | 4.128   | 0.24   |
| LOC441720 | 15.173  | 0.22   |
| LOC441722 | 1.228   | 11.11  |
| LOC441726 | 0.413   | 104.63 |
| LOC441728 | 13.601  | 0.02   |
| LOC441730 | 45.129  | 0      |
| LOC441732 | 301.008 | 0      |

|           |        |        |
|-----------|--------|--------|
| LOC441736 | 27.047 | 0.07   |
| LOC441737 | 2.343  | 0      |
| LOC441742 | 0.624  | 0      |
| LOC441744 | 8.652  | 7.43   |
| LOC441750 | 1.668  | 0.5    |
| LOC441768 | 1.176  | 0      |
| LOC441774 | 2.043  | 35.5   |
| LOC441775 | 0.569  | 145.08 |
| LOC441781 | 0.458  | 0      |
| LOC441783 | 3.537  | 0.07   |
| LOC441784 | 9.317  | 0      |
| LOC441792 | 0.177  | 0      |
| LOC441795 | 0.624  | 0.13   |
| LOC441800 | 22.591 | 0      |
| LOC441806 | 9.06   | 0.4    |
| LOC441811 | 56.732 | 0      |
| LOC441818 | 2.929  | 1.24   |
| LOC441843 | 45.73  | 0      |
| LOC441849 | 0.354  | 0      |
| LOC441861 | 3.127  | 0      |
| LOC441862 | 1.043  | 1.62   |
| LOC441864 | 0.348  | 0      |
| LOC441870 | 3.824  | 0      |
| LOC441873 | 1.751  | 0      |
| LOC441876 | 0.918  | 264.46 |
| LOC441878 | 0.768  | 0.33   |
| LOC441880 | 1.466  | 2.58   |
| LOC441884 | 48.327 | 0.01   |
| LOC441887 | 8.365  | 0.41   |
| LOC441891 | 0.942  | 2.59   |
| LOC441893 | 0.988  | 11.51  |
| LOC441896 | 9.966  | 0.01   |
| LOC441897 | 10.159 | 0      |
| LOC441899 | 0.51   | 3.8    |
| LOC441900 | 8.761  | 0      |
| LOC441904 | 1.237  | 2.72   |
| LOC441907 | 0.42   | 0      |
| LOC441914 | 0.548  | 1.23   |
| LOC441915 | 3.416  | 0.79   |
| LOC441925 | 1.296  | 0      |
| LOC441931 | 0.627  | 0      |
| LOC441938 | 73.341 | 0      |
| LOC441940 | 2.189  | 0      |
| LOC441956 | 1.839  | 0      |
| LOC441957 | 7.762  | 0      |
| LOC441958 | 1.23   | 0      |
| LOC441964 | 1.254  | 0.14   |
| LOC441969 | 0.318  | 0      |
| LOC441996 | 0.483  | 0      |
| LOC442006 | 0.853  | 0.69   |

|           |         |        |
|-----------|---------|--------|
| LOC442013 | 5.463   | 0.54   |
| LOC442017 | 0.444   | 19.54  |
| LOC442019 | 36.18   | 0.01   |
| LOC442021 | 7.007   | 0.02   |
| LOC442028 | 0.565   | 0      |
| LOC442035 | 12.015  | 0      |
| LOC442041 | 3.868   | 0.02   |
| LOC442042 | 0.423   | 0.59   |
| LOC442058 | 0.364   | 6.48   |
| LOC442060 | 0.734   | 4.25   |
| LOC442063 | 0.716   | 0.59   |
| LOC442064 | 1.231   | 1.23   |
| LOC442077 | 0.216   | 0      |
| LOC442078 | 24.655  | 0      |
| LOC442086 | 0.625   | 308.78 |
| LOC442087 | 1.29    | 10.84  |
| LOC442097 | 4.36    | 0.1    |
| LOC442098 | 1.004   | 1.68   |
| LOC442108 | 0.35    | 9.39   |
| LOC442112 | 1.912   | 16.12  |
| LOC442113 | 1.569   | 0.53   |
| LOC442114 | 0.834   | 0      |
| LOC442124 | 0.708   | 0      |
| LOC442128 | 0.732   | 0      |
| LOC442131 | 1.037   | 1.05   |
| LOC442132 | 2.048   | 0.04   |
| LOC442142 | 1.166   | 0      |
| LOC442147 | 0.39    | 0      |
| LOC442150 | 1.11    | 0      |
| LOC442153 | 18.116  | 0.03   |
| LOC442155 | 1.188   | 0.14   |
| LOC442156 | 124.838 | 0.1    |
| LOC442157 | 7.847   | 1.98   |
| LOC442160 | 0.306   | 0      |
| LOC442161 | 1.805   | 0      |
| LOC442162 | 0.841   | 0.9    |
| LOC442164 | 2.007   | 0.25   |
| LOC442167 | 1.237   | 0.54   |
| LOC442171 | 0.669   | 0.75   |
| LOC442172 | 9.533   | 0.03   |
| LOC442175 | 0.246   | 14.38  |
| LOC442181 | 8.284   | 0.02   |
| LOC442192 | 2.872   | 0.23   |
| LOC442195 | 1.218   | 0      |
| LOC442204 | 0.57    | 0      |
| LOC442205 | 1.305   | 0      |
| LOC442210 | 8.717   | 0.02   |
| LOC442211 | 0.984   | 5.3    |
| LOC442215 | 3.661   | 0.88   |
| LOC442217 | 0.973   | 1.9    |

|           |        |        |
|-----------|--------|--------|
| LOC442221 | 2.84   | 0.71   |
| LOC442227 | 0.375  | 0.22   |
| LOC442229 | 0.21   | 0      |
| LOC442231 | 1.06   | 0.56   |
| LOC442232 | 0.591  | 0.43   |
| LOC442233 | 1.221  | 1.45   |
| LOC442234 | 0.996  | 0.42   |
| LOC442236 | 88.967 | 0      |
| LOC442237 | 67.357 | 0.01   |
| LOC442238 | 5.976  | 0      |
| LOC442239 | 0.6    | 4.63   |
| LOC442240 | 1.365  | 6.05   |
| LOC442241 | 3.803  | 0      |
| LOC442242 | 0.74   | 0      |
| LOC442244 | 0.546  | 2.94   |
| LOC442245 | 0.654  | 6.82   |
| LOC442249 | 1.48   | 0      |
| LOC442252 | 1.283  | 0      |
| LOC442253 | 17.391 | 0.01   |
| LOC442255 | 1.239  | 2.72   |
| LOC442256 | 19.742 | 0      |
| LOC442257 | 0.812  | 0.62   |
| LOC442258 | 0.772  | 24.44  |
| LOC442260 | 0.471  | 1.25   |
| LOC442261 | 0.21   | 0.4    |
| LOC442262 | 1.007  | 0.67   |
| LOC442263 | 14.468 | 0.91   |
| LOC442266 | 1.522  | 0      |
| LOC442267 | 1.611  | 12.29  |
| LOC442270 | 0.5    | 259.95 |
| LOC442271 | 3.461  | 0      |
| LOC442272 | 6.296  | 0.28   |
| LOC442283 | 12.487 | 1.17   |
| LOC442287 | 0.147  | 0      |
| LOC442288 | 6.057  | 0      |
| LOC442290 | 1.51   | 0.11   |
| LOC442291 | 3.196  | 0      |
| LOC442292 | 1.082  | 0      |
| LOC442295 | 0.83   | 0      |
| LOC442299 | 1.702  | 0      |
| LOC442300 | 5.938  | 0.14   |
| LOC442304 | 2.877  | 0      |
| LOC442308 | 2.664  | 2.11   |
| LOC442309 | 0.914  | 16.22  |
| LOC442316 | 10.92  | 0      |
| LOC442317 | 5.009  | 0      |
| LOC442318 | 2.848  | 0      |
| LOC442319 | 44.74  | 0      |
| LOC442320 | 1.385  | 0      |
| LOC442325 | 7.846  | 0.07   |



|           |         |      |
|-----------|---------|------|
| LOC442326 | 0.726   | 7.66 |
| LOC442332 | 1.409   | 0    |
| LOC442335 | 0.758   | 0    |
| LOC442336 | 0.494   | 0    |
| LOC442347 | 0.332   | 0    |
| LOC442366 | 0.597   | 0    |
| LOC442367 | 28.043  | 0    |
| LOC442381 | 0.222   | 0    |
| LOC442388 | 0.972   | 0    |
| LOC442389 | 0.398   | 0.21 |
| LOC442395 | 47.955  | 0.47 |
| LOC442396 | 0.583   | 0.14 |
| LOC442405 | 1.275   | 0    |
| LOC442406 | 1.284   | 0    |
| LOC442415 | 139.099 | 0    |
| LOC442416 | 69.429  | 0.01 |
| LOC442421 | 0.372   | 1.36 |
| LOC442423 | 0.525   | 0    |
| LOC442426 | 0.908   | 0.47 |
| LOC442427 | 0.528   | 0    |
| LOC442429 | 9.855   | 2.86 |
| LOC442431 | 0.265   | 0    |
| LOC442434 | 24.934  | 0    |
| LOC442442 | 0.1     | 0    |
| LOC442443 | 73.667  | 0    |
| LOC442445 | 0.833   | 0    |
| LOC442446 | 22.768  | 0.01 |
| LOC442447 | 0.759   | 0.55 |
| LOC442448 | 0.912   | 1.11 |
| LOC442455 | 45.746  | 0    |
| LOC442459 | 38.867  | 0.04 |
| LOC442460 | 0.495   | 0    |
| LOC442461 | 0.669   | 0.5  |
| LOC442465 | 34.84   | 0    |
| LOC442479 | 3.322   | 0    |
| LOC442486 | 5.165   | 0    |
| LOC442500 | 7.326   | 0.52 |
| LOC442501 | 0.915   | 0    |
| LOC442511 | 44.277  | 0    |
| LOC442517 | 34.622  | 0.06 |
| LOC442523 | 16.438  | 0.01 |
| LOC442525 | 53.555  | 0.05 |
| LOC442546 | 10.483  | 0    |
| LOC442572 | 2.028   | 0.08 |
| LOC442573 | 17.718  | 0.1  |
| LOC442578 | 2.032   | 0.75 |
| LOC442582 | 2.702   | 0.1  |
| LOC442590 | 2.034   | 0.08 |
| LOC442609 | 5.328   | 0    |
| LOC442659 | 0.147   | 0    |

|           |        |        |
|-----------|--------|--------|
| LOC442660 | 6.057  | 0.02   |
| LOC442661 | 26.49  | 0      |
| LOC442663 | 3.196  | 0      |
| LOC442664 | 1.082  | 1.16   |
| LOC442666 | 0.783  | 0      |
| LOC442668 | 0.83   | 1.21   |
| LOC442673 | 5.937  | 0.55   |
| LOC442676 | 6.601  | 0      |
| LOC442677 | 2.878  | 0      |
| LOC442707 | 3.988  | 0.23   |
| LOC442709 | 1.409  | 5.5    |
| LOC442710 | 0.456  | 0      |
| LOC442712 | 0.758  | 0.55   |
| LOC442713 | 0.494  | 0.17   |
| LOC442720 | 1.974  | 8.62   |
| LOC442721 | 3.252  | 0      |
| LOC442723 | 0.822  | 100.83 |
| LOC442726 | 0.808  | 0      |
| LOC442727 | 0.332  | 1.27   |
| LOC442730 | 4.864  | 0.02   |
| LOC442744 | 9.287  | 0.02   |
| LOC442747 | 41.03  | 0.01   |
| LOC442777 | 0.568  | 79.94  |
| LOC442863 | 14.742 | 0      |
| LOC442864 | 15.688 | 0      |
| LOC442865 | 13.342 | 0      |
| LOC442866 | 13.342 | 0      |
| LOC449518 | 0.225  | 0      |
| LOC4687   | 3.328  | 6.13   |
| LOC492303 | 1.702  | 0.89   |
| LOC492311 | 2.871  | 0.62   |
| LOC493754 | 56.498 | 0.35   |
| LOC493869 | 1.37   | 0.06   |
| LOC494127 | 1.34   | 3.27   |
| LOC494141 | 2.079  | 0      |
| LOC494150 | 1.276  | 1.45   |
| LOC497190 | 1.865  | 0      |
| LOC497661 | 1.085  | 18.09  |
| LOC503540 | 1.732  | 1.85   |
| LOC51035  | 1.289  | 88.94  |
| LOC51057  | 3.508  | 0.96   |
| LOC51136  | 1.893  | 5.43   |
| LOC51149  | 2.066  | 1.43   |
| LOC51233  | 1.498  | 2.87   |
| LOC51252  | 0.962  | 2.28   |
| LOC51255  | 0.716  | 48.35  |
| LOC54103  | 4.552  | 1.35   |
| LOC541469 | 1.461  | 0.58   |
| LOC541473 | 1.96   | 0.6    |
| LOC544314 | 2.043  | 8.2    |

|           |        |       |
|-----------|--------|-------|
| LOC548599 | 0.635  | 2.65  |
| LOC550112 | 0.428  | 6.1   |
| LOC550631 | 2.64   | 0     |
| LOC550644 | 1.084  | 3.57  |
| LOC552891 | 1.448  | 1.17  |
| LOC553139 | 2.395  | 0     |
| LOC553148 | 6.924  | 0.14  |
| LOC553158 | 1.752  | 0     |
| LOC553820 | 10.389 | 0.01  |
| LOC553939 | 2.586  | 0.58  |
| LOC554049 | 1.134  | 0.37  |
| LOC554175 | 2.251  | 0.07  |
| LOC554203 | 1.241  | 1.09  |
| LOC554224 | 20.512 | 0.19  |
| LOC554225 | 19.084 | 0.03  |
| LOC554226 | 1.904  | 0     |
| LOC554234 | 0.502  | 1.01  |
| LOC554235 | 0.844  | 0.4   |
| LOC554251 | 2.719  | 0.4   |
| LOC55565  | 1.822  | 2.54  |
| LOC55908  | 1.223  | 0     |
| LOC56964  | 2.409  | 0     |
| LOC57228  | 1.239  | 31.48 |
| LOC572558 | 0.609  | 0.14  |
| LOC573971 | 3.497  | 7.93  |
| LOC574080 | 0.729  | 0.23  |
| LOC58489  | 2.998  | 9.05  |
| LOC595101 | 72.082 | 0.05  |
| LOC606495 | 0.838  | 1     |
| LOC606724 | 0.571  | 3.39  |
| LOC613037 | 26.038 | 0.03  |
| LOC613038 | 4.091  | 0     |
| LOC613206 | 1.516  | 0.72  |
| LOC613266 | 2.025  | 0     |
| LOC619207 | 19.426 | 0.06  |
| LOC619208 | 2.671  | 0.79  |
| LOC63920  | 2.807  | 0.51  |
| LOC63928  | 2.366  | 0     |
| LOC641293 | 0.604  | 0.83  |
| LOC641311 | 1.558  | 3.56  |
| LOC641378 | 2.441  | 0.17  |
| LOC641379 | 7.282  | 1.25  |
| LOC641380 | 3.068  | 0.03  |
| LOC641381 | 0.653  | 0     |
| LOC641382 | 3.364  | 0     |
| LOC641456 | 0.421  | 6.81  |
| LOC641457 | 0.424  | 6.56  |
| LOC641515 | 1.3    | 0     |
| LOC641518 | 1.706  | 5.87  |
| LOC641522 | 1.333  | 0.51  |

|           |        |      |
|-----------|--------|------|
| LOC641695 | 1.051  | 0.8  |
| LOC641696 | 0.699  | 0    |
| LOC641705 | 0.626  | 3.09 |
| LOC641708 | 11.31  | 0.13 |
| LOC641717 | 29.056 | 0    |
| LOC641719 | 0.576  | 0    |
| LOC641720 | 29.061 | 0    |
| LOC641727 | 0.794  | 0.21 |
| LOC641728 | 0.264  | 0    |
| LOC641730 | 7.769  | 0    |
| LOC641734 | 3.095  | 0    |
| LOC641745 | 1.125  | 0    |
| LOC641746 | 0.267  | 0    |
| LOC641748 | 0.6    | 0    |
| LOC641752 | 1.96   | 0.17 |
| LOC641755 | 3.722  | 0    |
| LOC641761 | 69.252 | 0.05 |
| LOC641763 | 0.354  | 0.48 |
| LOC641765 | 2.13   | 0.2  |
| LOC641766 | 0.585  | 0    |
| LOC641767 | 0.618  | 0    |
| LOC641768 | 0.437  | 0    |
| LOC641776 | 1.596  | 0    |
| LOC641777 | 0.88   | 0    |
| LOC641784 | 0.377  | 0    |
| LOC641787 | 0.794  | 0.21 |
| LOC641789 | 3.153  | 0    |
| LOC641790 | 0.375  | 0    |
| LOC641796 | 0.432  | 0    |
| LOC641798 | 2.23   | 0    |
| LOC641803 | 3.554  | 0.03 |
| LOC641808 | 2.16   | 0.24 |
| LOC641814 | 0.922  | 0    |
| LOC641826 | 0.924  | 0    |
| LOC641827 | 0.789  | 0.21 |
| LOC641830 | 0.207  | 0    |
| LOC641832 | 0.561  | 0    |
| LOC641835 | 0.573  | 0    |
| LOC641840 | 0.418  | 0    |
| LOC641842 | 73.468 | 0.03 |
| LOC641844 | 1.267  | 0.14 |
| LOC641845 | 1.548  | 0.05 |
| LOC641849 | 0.793  | 0    |
| LOC641850 | 0.808  | 0    |
| LOC641853 | 1.322  | 0    |
| LOC641856 | 0.495  | 0    |
| LOC641857 | 0.342  | 0    |
| LOC641858 | 0.666  | 0    |
| LOC641859 | 1.131  | 0    |
| LOC641863 | 0.348  | 0    |

|           |        |      |
|-----------|--------|------|
| LOC641894 | 0.807  | 0    |
| LOC641895 | 0.24   | 0    |
| LOC641900 | 1.698  | 0    |
| LOC641901 | 1.035  | 0    |
| LOC641902 | 0.393  | 0    |
| LOC641903 | 0.198  | 0    |
| LOC641905 | 0.693  | 0    |
| LOC641909 | 5.663  | 0.01 |
| LOC641911 | 0.456  | 3.14 |
| LOC641912 | 1.781  | 0    |
| LOC641916 | 3.972  | 0.89 |
| LOC641920 | 0.776  | 0    |
| LOC641922 | 1.5    | 0.28 |
| LOC641924 | 18.062 | 0.01 |
| LOC641930 | 2.192  | 0    |
| LOC641931 | 0.927  | 0    |
| LOC641933 | 4.016  | 0    |
| LOC641936 | 0.303  | 0    |
| LOC641940 | 1.77   | 0.14 |
| LOC641942 | 0.984  | 0    |
| LOC641945 | 6.681  | 0    |
| LOC641948 | 2.052  | 0    |
| LOC641955 | 0.621  | 0    |
| LOC641959 | 0.837  | 0    |
| LOC641961 | 1.887  | 0    |
| LOC641963 | 0.502  | 0    |
| LOC641971 | 0.408  | 0    |
| LOC641977 | 2.271  | 0.22 |
| LOC641980 | 1.65   | 0    |
| LOC641983 | 8.043  | 0    |
| LOC641987 | 0.483  | 0    |
| LOC641990 | 4.55   | 0    |
| LOC641992 | 0.569  | 0    |
| LOC641994 | 0.954  | 0.44 |
| LOC642002 | 7.485  | 0    |
| LOC642004 | 4.382  | 0.42 |
| LOC642005 | 0.387  | 0    |
| LOC642006 | 37.249 | 0.01 |
| LOC642007 | 21.831 | 0.01 |
| LOC642009 | 0.788  | 0    |
| LOC642014 | 0.675  | 0    |
| LOC642018 | 0.216  | 0    |
| LOC642019 | 0.69   | 0    |
| LOC642024 | 0.879  | 0    |
| LOC642026 | 0.576  | 0    |
| LOC642030 | 0.839  | 0    |
| LOC642031 | 3.13   | 0.03 |
| LOC642038 | 0.168  | 0    |
| LOC642043 | 14.393 | 2.09 |
| LOC642044 | 0.994  | 0    |

|           |        |       |
|-----------|--------|-------|
| LOC642045 | 0.636  | 0     |
| LOC642051 | 0.687  | 0     |
| LOC642056 | 0.576  | 0     |
| LOC642059 | 0.839  | 0     |
| LOC642072 | 40.331 | 4.24  |
| LOC642073 | 15.978 | 0.17  |
| LOC642074 | 15.574 | 1.94  |
| LOC642075 | 0.994  | 0     |
| LOC642076 | 0.636  | 0     |
| LOC642096 | 23.878 | 0.08  |
| LOC642131 | 0.618  | 0.27  |
| LOC642198 | 2.635  | 0.48  |
| LOC642255 | 2.785  | 0     |
| LOC642259 | 1.045  | 44.82 |
| LOC642262 | 1.14   | 0.67  |
| LOC642263 | 12.151 | 0     |
| LOC642276 | 1.257  | 0     |
| LOC642277 | 0.246  | 0.68  |
| LOC642278 | 0.603  | 0     |
| LOC642284 | 5.625  | 0     |
| LOC642288 | 22.298 | 0     |
| LOC642290 | 23.173 | 0.23  |
| LOC642295 | 0.267  | 0     |
| LOC642296 | 2.591  | 0     |
| LOC642300 | 61.019 | 0     |
| LOC642305 | 1.048  | 6.03  |
| LOC642306 | 12.481 | 0.12  |
| LOC642307 | 0.938  | 0     |
| LOC642311 | 1.611  | 0     |
| LOC642313 | 1.637  | 0     |
| LOC642317 | 18.138 | 0.26  |
| LOC642319 | 29.036 | 0     |
| LOC642325 | 8.893  | 0     |
| LOC642329 | 11.625 | 0     |
| LOC642335 | 2.434  | 0.25  |
| LOC642337 | 0.525  | 0     |
| LOC642340 | 1.023  | 0.58  |
| LOC642341 | 0.438  | 0     |
| LOC642343 | 0.495  | 0.17  |
| LOC642346 | 12.729 | 0     |
| LOC642350 | 1.093  | 0.08  |
| LOC642355 | 0.342  | 0     |
| LOC642357 | 1.31   | 44.82 |
| LOC642361 | 2.64   | 3.12  |
| LOC642362 | 0.69   | 0     |
| LOC642366 | 2.33   | 0     |
| LOC642367 | 2.19   | 0.81  |
| LOC642373 | 45.779 | 0     |
| LOC642381 | 0.279  | 0.31  |
| LOC642383 | 0.879  | 0     |

|           |        |      |
|-----------|--------|------|
| LOC642384 | 2.291  | 0.03 |
| LOC642385 | 2.405  | 0    |
| LOC642389 | 2.601  | 0    |
| LOC642395 | 64.887 | 0.1  |
| LOC642397 | 90.284 | 0.14 |
| LOC642398 | 6.697  | 0    |
| LOC642399 | 0.542  | 0    |
| LOC642401 | 1.121  | 0    |
| LOC642402 | 6.927  | 0    |
| LOC642406 | 146.29 | 0    |
| LOC642413 | 5.047  | 0    |
| LOC642414 | 8.311  | 0    |
| LOC642421 | 1.131  | 0    |
| LOC642423 | 34.357 | 0.01 |
| LOC642424 | 0.609  | 0    |
| LOC642425 | 7.382  | 0    |
| LOC642426 | 1.493  | 0    |
| LOC642433 | 0.578  | 0    |
| LOC642440 | 0.162  | 0.52 |
| LOC642441 | 8.151  | 0.06 |
| LOC642443 | 2.331  | 3.94 |
| LOC642446 | 1.71   | 0    |
| LOC642448 | 32.046 | 0    |
| LOC642450 | 0.879  | 0    |
| LOC642451 | 1.805  | 0.33 |
| LOC642452 | 0.588  | 0    |
| LOC642458 | 2.171  | 0.08 |
| LOC642460 | 50.352 | 0    |
| LOC642461 | 0.264  | 0    |
| LOC642469 | 15.702 | 0    |
| LOC642471 | 0.414  | 0    |
| LOC642474 | 8.191  | 0    |
| LOC642483 | 0.498  | 0    |
| LOC642486 | 0.735  | 0    |
| LOC642487 | 9.009  | 0    |
| LOC642490 | 0.506  | 0    |
| LOC642493 | 1.305  | 0    |
| LOC642496 | 13.177 | 0    |
| LOC642505 | 0.246  | 7.19 |
| LOC642511 | 27.485 | 0.02 |
| LOC642513 | 2.785  | 0.09 |
| LOC642515 | 0.867  | 0    |
| LOC642521 | 0.513  | 0    |
| LOC642522 | 12.833 | 0    |
| LOC642533 | 12.636 | 0.28 |
| LOC642536 | 0.336  | 0.51 |
| LOC642538 | 0.522  | 0    |
| LOC642539 | 47.219 | 0    |
| LOC642544 | 0.472  | 0    |
| LOC642545 | 15.172 | 0    |

|           |        |       |
|-----------|--------|-------|
| LOC642546 | 2.737  | 0.43  |
| LOC642550 | 0.737  | 1.49  |
| LOC642554 | 3.737  | 0.11  |
| LOC642555 | 1.332  | 0     |
| LOC642559 | 1.378  | 0     |
| LOC642563 | 0.588  | 0     |
| LOC642567 | 1.593  | 0.26  |
| LOC642569 | 7.376  | 0     |
| LOC642574 | 1.758  | 0     |
| LOC642578 | 0.234  | 0     |
| LOC642579 | 8.369  | 0     |
| LOC642580 | 0.404  | 0     |
| LOC642585 | 1.78   | 8.38  |
| LOC642587 | 1.37   | 0     |
| LOC642588 | 3.515  | 0.03  |
| LOC642590 | 1.67   | 2.42  |
| LOC642592 | 4.043  | 1.31  |
| LOC642597 | 0.984  | 0     |
| LOC642599 | 3.199  | 0     |
| LOC642609 | 4.29   | 0     |
| LOC642612 | 0.69   | 0     |
| LOC642614 | 1.218  | 0     |
| LOC642617 | 2.124  | 0.08  |
| LOC642622 | 1.059  | 0     |
| LOC642623 | 1.182  | 0     |
| LOC642627 | 0.348  | 2.66  |
| LOC642629 | 3.99   | 0     |
| LOC642631 | 10.475 | 0     |
| LOC642633 | 1.664  | 0     |
| LOC642635 | 24.523 | 0.01  |
| LOC642636 | 1.389  | 0     |
| LOC642637 | 0.603  | 0     |
| LOC642648 | 0.797  | 0.1   |
| LOC642652 | 5.728  | 0     |
| LOC642656 | 0.894  | 0     |
| LOC642658 | 0.606  | 1.95  |
| LOC642659 | 1.361  | 29.28 |
| LOC642661 | 2.413  | 0.07  |
| LOC642662 | 1.608  | 0     |
| LOC642663 | 0.483  | 0.53  |
| LOC642666 | 0.411  | 1.03  |
| LOC642669 | 0.677  | 0     |
| LOC642672 | 0.318  | 0     |
| LOC642677 | 0.639  | 0     |
| LOC642678 | 0.798  | 0     |
| LOC642681 | 0.563  | 0     |
| LOC642683 | 6.348  | 0     |
| LOC642692 | 0.21   | 0     |
| LOC642694 | 0.489  | 0     |
| LOC642697 | 19.114 | 0     |



|           |        |        |
|-----------|--------|--------|
| LOC642702 | 0.374  | 0      |
| LOC642704 | 0.444  | 0      |
| LOC642707 | 2.322  | 0      |
| LOC642721 | 1.556  | 0      |
| LOC642727 | 0.222  | 4.55   |
| LOC642728 | 3.435  | 0      |
| LOC642731 | 0.921  | 0      |
| LOC642732 | 4.118  | 0.55   |
| LOC642734 | 0.855  | 0.39   |
| LOC642737 | 1.825  | 0.27   |
| LOC642738 | 0.578  | 0.88   |
| LOC642740 | 0.559  | 1.66   |
| LOC642741 | 1.31   | 142.04 |
| LOC642755 | 1.578  | 0.27   |
| LOC642758 | 0.357  | 0      |
| LOC642759 | 0.696  | 0.6    |
| LOC642765 | 0.465  | 0      |
| LOC642773 | 0.939  | 0      |
| LOC642778 | 23.629 | 0.05   |
| LOC642781 | 1.58   | 0      |
| LOC642784 | 1.368  | 39.23  |
| LOC642788 | 10.595 | 0      |
| LOC642791 | 38.639 | 0      |
| LOC642796 | 0.509  | 0      |
| LOC642799 | 23.627 | 0.06   |
| LOC642802 | 0.771  | 1.31   |
| LOC642812 | 1.549  | 4.56   |
| LOC642817 | 1.348  | 0.63   |
| LOC642818 | 1.135  | 0      |
| LOC642826 | 2.136  | 0      |
| LOC642828 | 0.928  | 4.45   |
| LOC642837 | 1.269  | 0      |
| LOC642838 | 2.187  | 0      |
| LOC642840 | 7.767  | 0      |
| LOC642843 | 0.826  | 7.65   |
| LOC642846 | 4.413  | 1.05   |
| LOC642850 | 54.589 | 0      |
| LOC642851 | 14.528 | 0      |
| LOC642852 | 0.407  | 0.62   |
| LOC642861 | 0.213  | 0      |
| LOC642872 | 0.816  | 0.2    |
| LOC642874 | 0.366  | 0      |
| LOC642879 | 30.5   | 0.01   |
| LOC642888 | 3.747  | 0      |
| LOC642890 | 0.504  | 1.67   |
| LOC642891 | 0.937  | 0.09   |
| LOC642892 | 0.171  | 13.79  |
| LOC642893 | 1.011  | 0      |
| LOC642894 | 9.641  | 0      |
| LOC642897 | 0.964  | 0.09   |

|           |        |        |
|-----------|--------|--------|
| LOC642907 | 0.874  | 0      |
| LOC642909 | 12.302 | 0.23   |
| LOC642910 | 2.209  | 0.26   |
| LOC642921 | 2.763  | 0.21   |
| LOC642922 | 0.621  | 0      |
| LOC642927 | 0.861  | 0      |
| LOC642935 | 33.75  | 0.02   |
| LOC642936 | 0.498  | 0      |
| LOC642940 | 14.139 | 0.19   |
| LOC642943 | 9.078  | 0      |
| LOC642947 | 1.751  | 0      |
| LOC642952 | 1.643  | 0      |
| LOC642954 | 2.305  | 11.08  |
| LOC642956 | 0.689  | 0.25   |
| LOC642958 | 4.859  | 0.03   |
| LOC642959 | 28.158 | 0      |
| LOC642975 | 1.471  | 15.41  |
| LOC642979 | 1.653  | 0      |
| LOC642980 | 4.066  | 0.62   |
| LOC642991 | 0.684  | 0      |
| LOC642996 | 21.231 | 0.01   |
| LOC642998 | 0.522  | 0.16   |
| LOC643001 | 0.333  | 0      |
| LOC643008 | 5.585  | 0.37   |
| LOC643014 | 9.486  | 0.31   |
| LOC643015 | 2.147  | 2.55   |
| LOC643017 | 0.153  | 0      |
| LOC643022 | 0.647  | 0.13   |
| LOC643031 | 0.513  | 223.81 |
| LOC643033 | 0.981  | 0.26   |
| LOC643034 | 1.269  | 0      |
| LOC643037 | 0.694  | 0      |
| LOC643042 | 0.438  | 0      |
| LOC643043 | 0.321  | 8.4    |
| LOC643050 | 1.338  | 0      |
| LOC643052 | 1.059  | 0      |
| LOC643058 | 0.65   | 0.52   |
| LOC643063 | 0.482  | 0      |
| LOC643064 | 36.985 | 0      |
| LOC643067 | 1.184  | 0      |
| LOC643069 | 1.658  | 0      |
| LOC643072 | 1.75   | 2.98   |
| LOC643073 | 0.603  | 0.28   |
| LOC643079 | 3.029  | 0.22   |
| LOC643081 | 0.318  | 0      |
| LOC643085 | 1.767  | 0.29   |
| LOC643086 | 0.552  | 0      |
| LOC643095 | 9.344  | 0      |
| LOC643100 | 0.618  | 0      |
| LOC643101 | 0.24   | 0.35   |

|           |        |       |
|-----------|--------|-------|
| LOC643102 | 3.655  | 0.88  |
| LOC643106 | 0.894  | 0.38  |
| LOC643109 | 0.831  | 0.41  |
| LOC643114 | 45.348 | 0     |
| LOC643118 | 8.581  | 0     |
| LOC643123 | 19.789 | 0     |
| LOC643126 | 7.22   | 0     |
| LOC643133 | 1.02   | 0     |
| LOC643134 | 0.288  | 0     |
| LOC643136 | 5.195  | 1.41  |
| LOC643143 | 0.398  | 0     |
| LOC643151 | 4.12   | 0     |
| LOC643153 | 2.437  | 0.2   |
| LOC643157 | 16.976 | 0     |
| LOC643159 | 1.44   | 7.55  |
| LOC643160 | 11.961 | 0     |
| LOC643161 | 0.362  | 0     |
| LOC643166 | 52.478 | 0     |
| LOC643167 | 2.454  | 12.42 |
| LOC643168 | 4.486  | 0.39  |
| LOC643171 | 19.401 | 0     |
| LOC643172 | 2.267  | 0     |
| LOC643177 | 13.251 | 0.01  |
| LOC643179 | 0.195  | 0     |
| LOC643181 | 37.189 | 0     |
| LOC643182 | 7.231  | 0.22  |
| LOC643187 | 32.839 | 0     |
| LOC643189 | 0.57   | 0     |
| LOC643193 | 0.459  | 41.3  |
| LOC643194 | 1.023  | 2.23  |
| LOC643198 | 1.263  | 0     |
| LOC643199 | 53.31  | 0.01  |
| LOC643201 | 0.748  | 0     |
| LOC643205 | 0.315  | 0     |
| LOC643219 | 27.473 | 0.14  |
| LOC643220 | 1.256  | 0.67  |
| LOC643224 | 1.494  | 0     |
| LOC643226 | 0.747  | 0     |
| LOC643227 | 0.15   | 0     |
| LOC643228 | 46.62  | 0     |
| LOC643232 | 1.271  | 0.33  |
| LOC643233 | 0.54   | 0     |
| LOC643244 | 1.745  | 0.24  |
| LOC643255 | 0.682  | 0.25  |
| LOC643260 | 0.525  | 9.15  |
| LOC643263 | 0.586  | 0     |
| LOC643264 | 0.859  | 0.3   |
| LOC643271 | 0.324  | 0     |
| LOC643275 | 1.187  | 0     |
| LOC643276 | 2.757  | 3.48  |

|           |         |        |
|-----------|---------|--------|
| LOC643278 | 0.681   | 0      |
| LOC643280 | 9.569   | 0.48   |
| LOC643281 | 0.636   | 0      |
| LOC643287 | 1.371   | 1.41   |
| LOC643300 | 2.263   | 2.27   |
| LOC643305 | 0.681   | 5.19   |
| LOC643307 | 51.346  | 0      |
| LOC643308 | 1.698   | 0.2    |
| LOC643309 | 1.118   | 0.37   |
| LOC643310 | 0.246   | 0      |
| LOC643319 | 1.353   | 13.14  |
| LOC643321 | 54.805  | 0      |
| LOC643324 | 0.381   | 0      |
| LOC643327 | 0.578   | 1.61   |
| LOC643329 | 50.382  | 0.02   |
| LOC643330 | 0.429   | 0      |
| LOC643332 | 0.481   | 1.05   |
| LOC643334 | 0.402   | 0      |
| LOC643336 | 0.569   | 1.19   |
| LOC643338 | 2.492   | 0.34   |
| LOC643339 | 0.572   | 0.88   |
| LOC643341 | 0.321   | 0      |
| LOC643342 | 2.473   | 0.88   |
| LOC643345 | 0.168   | 0      |
| LOC643348 | 20.367  | 0      |
| LOC643353 | 1.125   | 0      |
| LOC643355 | 1.794   | 0      |
| LOC643358 | 0.83    | 301.63 |
| LOC643362 | 0.954   | 0      |
| LOC643367 | 4.324   | 0      |
| LOC643368 | 0.555   | 0      |
| LOC643370 | 7.031   | 0.01   |
| LOC643371 | 230.573 | 0      |
| LOC643373 | 0.756   | 0.55   |
| LOC643377 | 0.639   | 0      |
| LOC643382 | 1.02    | 0.25   |
| LOC643384 | 9.678   | 0.01   |
| LOC643386 | 0.552   | 1.22   |
| LOC643387 | 2.676   | 2.24   |
| LOC643395 | 0.282   | 0      |
| LOC643397 | 1.577   | 0.05   |
| LOC643412 | 0.961   | 0.52   |
| LOC643416 | 0.372   | 1.36   |
| LOC643421 | 0.508   | 1.16   |
| LOC643427 | 1.581   | 2.66   |
| LOC643428 | 0.33    | 0      |
| LOC643441 | 2.071   | 0      |
| LOC643445 | 9.528   | 0      |
| LOC643446 | 4.527   | 5.15   |
| LOC643447 | 10.801  | 0      |

|           |        |        |
|-----------|--------|--------|
| LOC643449 | 0.539  | 0      |
| LOC643454 | 1.288  | 4.65   |
| LOC643459 | 3.02   | 0.05   |
| LOC643461 | 0.879  | 0      |
| LOC643464 | 0.848  | 0.3    |
| LOC643470 | 10.513 | 0.06   |
| LOC643471 | 1.277  | 0.07   |
| LOC643474 | 1.134  | 0      |
| LOC643475 | 4.904  | 0      |
| LOC643479 | 0.322  | 0      |
| LOC643491 | 1.035  | 0      |
| LOC643494 | 1.074  | 0.71   |
| LOC643499 | 0.537  | 58.51  |
| LOC643503 | 1.203  | 0.35   |
| LOC643505 | 0.198  | 5.11   |
| LOC643506 | 1.083  | 0      |
| LOC643507 | 0.74   | 0      |
| LOC643513 | 1.591  | 0.64   |
| LOC643514 | 0.816  | 0      |
| LOC643517 | 0.676  | 7.72   |
| LOC643519 | 2.151  | 0      |
| LOC643524 | 0.666  | 0      |
| LOC643531 | 0.603  | 0.7    |
| LOC643533 | 0.423  | 0      |
| LOC643534 | 0.489  | 247.36 |
| LOC643535 | 1.4    | 0.06   |
| LOC643536 | 1.717  | 3.73   |
| LOC643543 | 1.022  | 0      |
| LOC643547 | 0.567  | 0.44   |
| LOC643550 | 0.411  | 2.25   |
| LOC643551 | 0.765  | 0.11   |
| LOC643554 | 0.135  | 0      |
| LOC643560 | 68.232 | 0.04   |
| LOC643561 | 0.351  | 0      |
| LOC643562 | 19.175 | 0.54   |
| LOC643563 | 0.318  | 0.26   |
| LOC643579 | 39.58  | 0      |
| LOC643582 | 0.827  | 0      |
| LOC643586 | 24.498 | 2.25   |
| LOC643587 | 16.096 | 0      |
| LOC643589 | 10.39  | 0.01   |
| LOC643594 | 2.433  | 0      |
| LOC643596 | 0.9    | 0.09   |
| LOC643599 | 0.506  | 0      |
| LOC643605 | 1.159  | 0.8    |
| LOC643609 | 21.289 | 0      |
| LOC643613 | 20.672 | 0.04   |
| LOC643615 | 1.119  | 0      |
| LOC643617 | 1.04   | 1.05   |
| LOC643618 | 0.899  | 0      |

|           |        |       |
|-----------|--------|-------|
| LOC643623 | 2.965  | 0.03  |
| LOC643630 | 2.133  | 0     |
| LOC643631 | 0.255  | 0.66  |
| LOC643634 | 2.452  | 17.69 |
| LOC643637 | 1.568  | 0     |
| LOC643639 | 4.003  | 0.02  |
| LOC643641 | 13.208 | 1.24  |
| LOC643646 | 4.096  | 0.78  |
| LOC643652 | 1.568  | 0     |
| LOC643653 | 0.751  | 0.33  |
| LOC643654 | 0.594  | 0     |
| LOC643665 | 0.954  | 0     |
| LOC643668 | 1.572  | 1.56  |
| LOC643669 | 1.092  | 0.31  |
| LOC643670 | 0.483  | 6.28  |
| LOC643677 | 11.201 | 0     |
| LOC643678 | 0.96   | 0     |
| LOC643680 | 0.69   | 0     |
| LOC643684 | 1.456  | 0     |
| LOC643689 | 1.567  | 4.95  |
| LOC643694 | 0.864  | 0     |
| LOC643696 | 7.191  | 0     |
| LOC643699 | 4.018  | 0.52  |
| LOC643703 | 1.029  | 0     |
| LOC643707 | 34.376 | 0     |
| LOC643709 | 4.994  | 0     |
| LOC643711 | 0.27   | 0     |
| LOC643714 | 0.999  | 0     |
| LOC643717 | 0.616  | 0     |
| LOC643718 | 0.367  | 0     |
| LOC643719 | 0.616  | 0.54  |
| LOC643723 | 0.473  | 0     |
| LOC643733 | 6.453  | 0.42  |
| LOC643737 | 1.272  | 23.91 |
| LOC643739 | 8.616  | 0.01  |
| LOC643744 | 1.235  | 0.2   |
| LOC643745 | 1.101  | 0     |
| LOC643746 | 0.919  | 0.64  |
| LOC643749 | 0.609  | 1.8   |
| LOC643750 | 0.501  | 0     |
| LOC643751 | 2.407  | 10.08 |
| LOC643753 | 0.235  | 19.72 |
| LOC643759 | 1.137  | 0     |
| LOC643762 | 88.782 | 0     |
| LOC643766 | 1.319  | 0.32  |
| LOC643768 | 32.494 | 0.03  |
| LOC643770 | 1.825  | 0.14  |
| LOC643778 | 2.829  | 0     |
| LOC643779 | 1.004  | 24.5  |
| LOC643783 | 1.189  | 0.99  |

|           |        |        |
|-----------|--------|--------|
| LOC643784 | 0.788  | 0      |
| LOC643789 | 13.146 | 0      |
| LOC643790 | 1.323  | 4.97   |
| LOC643802 | 12.773 | 0.01   |
| LOC643804 | 0.492  | 0      |
| LOC643806 | 1.842  | 0      |
| LOC643810 | 6.157  | 0.08   |
| LOC643825 | 1.254  | 0      |
| LOC643827 | 84.931 | 0      |
| LOC643831 | 0.72   | 0      |
| LOC643836 | 17.14  | 0.97   |
| LOC643845 | 1.263  | 0      |
| LOC643851 | 0.189  | 0.44   |
| LOC643852 | 5.663  | 0.01   |
| LOC643854 | 3.894  | 0      |
| LOC643855 | 0.186  | 0      |
| LOC643856 | 4.629  | 0.02   |
| LOC643858 | 1.349  | 0      |
| LOC643859 | 3.412  | 0      |
| LOC643860 | 69.422 | 0      |
| LOC643862 | 1.596  | 0      |
| LOC643863 | 0.6    | 1.83   |
| LOC643870 | 0.646  | 35.6   |
| LOC643872 | 1.226  | 0.14   |
| LOC643873 | 1.813  | 19.33  |
| LOC643875 | 0.3    | 0.28   |
| LOC643877 | 14.524 | 0      |
| LOC643878 | 0.222  | 0      |
| LOC643880 | 1.371  | 0      |
| LOC643883 | 0.72   | 0.82   |
| LOC643884 | 0.564  | 0      |
| LOC643888 | 5.261  | 0.18   |
| LOC643894 | 1.073  | 0.31   |
| LOC643897 | 1.139  | 38.16  |
| LOC643898 | 0.512  | 0      |
| LOC643901 | 0.411  | 1.03   |
| LOC643904 | 0.663  | 0      |
| LOC643905 | 1.17   | 0      |
| LOC643906 | 0.741  | 0.57   |
| LOC643909 | 2.271  | 0      |
| LOC643915 | 0.894  | 0      |
| LOC643916 | 0.339  | 0      |
| LOC643921 | 13.248 | 0.03   |
| LOC643923 | 0.972  | 0      |
| LOC643926 | 0.375  | 0      |
| LOC643932 | 1.642  | 0.36   |
| LOC643933 | 0.651  | 0.13   |
| LOC643936 | 0.657  | 0.51   |
| LOC643938 | 0.15   | 0      |
| LOC643949 | 0.379  | 973.27 |

|           |        |       |
|-----------|--------|-------|
| LOC643950 | 0.723  | 0.7   |
| LOC643951 | 0.576  | 0     |
| LOC643954 | 0.625  | 0.94  |
| LOC643955 | 29.056 | 0     |
| LOC643960 | 0.91   | 0.56  |
| LOC643962 | 2.741  | 0     |
| LOC643965 | 0.444  | 0     |
| LOC643971 | 0.772  | 0.22  |
| LOC643972 | 0.486  | 1.04  |
| LOC643974 | 8.735  | 0.42  |
| LOC643976 | 1.548  | 1.63  |
| LOC643981 | 2.277  | 1.15  |
| LOC643983 | 0.597  | 0.28  |
| LOC643986 | 0.474  | 0     |
| LOC643987 | 6.576  | 0     |
| LOC643988 | 2.083  | 2.39  |
| LOC643989 | 1.563  | 0.16  |
| LOC643992 | 2.349  | 0.28  |
| LOC643996 | 0.895  | 0     |
| LOC643997 | 0.646  | 0.26  |
| LOC644000 | 0.576  | 0.73  |
| LOC644006 | 2.759  | 1.59  |
| LOC644010 | 1.784  | 1.79  |
| LOC644012 | 0.678  | 0     |
| LOC644013 | 0.746  | 0.23  |
| LOC644016 | 1.691  | 0.1   |
| LOC644017 | 29.061 | 0     |
| LOC644020 | 6.177  | 0     |
| LOC644021 | 17.921 | 0     |
| LOC644022 | 0.386  | 0.65  |
| LOC644023 | 0.204  | 1.65  |
| LOC644026 | 1.011  | 0     |
| LOC644029 | 0.908  | 132.2 |
| LOC644030 | 4.979  | 0.02  |
| LOC644035 | 1.853  | 61.82 |
| LOC644037 | 1.753  | 1.73  |
| LOC644038 | 1.621  | 0     |
| LOC644042 | 0.947  | 0.08  |
| LOC644045 | 1.816  | 0     |
| LOC644050 | 8.244  | 0.02  |
| LOC644051 | 1.346  | 0.75  |
| LOC644054 | 0.362  | 0     |
| LOC644055 | 0.987  | 0     |
| LOC644056 | 0.456  | 0     |
| LOC644060 | 1.662  | 1.97  |
| LOC644063 | 2.903  | 60.67 |
| LOC644065 | 0.603  | 0     |
| LOC644066 | 0.822  | 0     |
| LOC644070 | 28.906 | 0     |
| LOC644075 | 1.041  | 0.25  |



|           |        |       |
|-----------|--------|-------|
| LOC644079 | 7.502  | 0.09  |
| LOC644082 | 3.011  | 89.08 |
| LOC644083 | 2.336  | 0     |
| LOC644090 | 1.781  | 0     |
| LOC644092 | 0.849  | 0.4   |
| LOC644094 | 77.195 | 0     |
| LOC644096 | 1.147  | 12.26 |
| LOC644098 | 0.387  | 0.22  |
| LOC644100 | 0.387  | 0     |
| LOC644101 | 0.901  | 5.33  |
| LOC644103 | 0.462  | 0     |
| LOC644106 | 2.198  | 0.04  |
| LOC644109 | 1.179  | 0     |
| LOC644110 | 5.663  | 0     |
| LOC644111 | 0.558  | 0.31  |
| LOC644119 | 0.234  | 6.84  |
| LOC644124 | 7.972  | 0     |
| LOC644129 | 13.733 | 0     |
| LOC644131 | 2.221  | 19.91 |
| LOC644132 | 10.368 | 0     |
| LOC644135 | 0.471  | 0     |
| LOC644138 | 9.531  | 0.55  |
| LOC644140 | 4.457  | 0.09  |
| LOC644141 | 8.26   | 0.59  |
| LOC644146 | 0.567  | 19.31 |
| LOC644151 | 0.631  | 0     |
| LOC644152 | 0.309  | 0     |
| LOC644153 | 2.363  | 0     |
| LOC644154 | 9.175  | 0     |
| LOC644157 | 2.218  | 1.55  |
| LOC644158 | 2.701  | 0     |
| LOC644159 | 7.769  | 0.05  |
| LOC644160 | 1.116  | 0.45  |
| LOC644165 | 4.606  | 0.19  |
| LOC644166 | 0.658  | 0.13  |
| LOC644168 | 0.807  | 0     |
| LOC644169 | 2.049  | 0.2   |
| LOC644170 | 2.138  | 0     |
| LOC644171 | 0.755  | 0     |
| LOC644172 | 1.302  | 0.52  |
| LOC644173 | 1.373  | 0     |
| LOC644181 | 8.738  | 0     |
| LOC644182 | 0.531  | 0     |
| LOC644186 | 0.442  | 0     |
| LOC644189 | 1.723  | 0     |
| LOC644191 | 0.784  | 0     |
| LOC644192 | 0.441  | 0.19  |
| LOC644193 | 0.975  | 0     |
| LOC644196 | 4.271  | 0     |
| LOC644198 | 0.346  | 54.78 |

|           |        |       |
|-----------|--------|-------|
| LOC644199 | 79.287 | 0     |
| LOC644201 | 3.946  | 0     |
| LOC644202 | 2.569  | 0.16  |
| LOC644203 | 1.556  | 0     |
| LOC644213 | 5.275  | 0.02  |
| LOC644214 | 0.879  | 0.67  |
| LOC644215 | 0.829  | 0.71  |
| LOC644216 | 0.513  | 0     |
| LOC644220 | 1.126  | 21.77 |
| LOC644222 | 0.586  | 0     |
| LOC644223 | 0.577  | 0.44  |
| LOC644224 | 1.077  | 0     |
| LOC644231 | 68.093 | 0.06  |
| LOC644232 | 25.923 | 0.11  |
| LOC644233 | 11.936 | 0     |
| LOC644235 | 5.458  | 0.47  |
| LOC644236 | 0.794  | 0.85  |
| LOC644237 | 2.399  | 0.14  |
| LOC644248 | 2.756  | 0     |
| LOC644249 | 0.615  | 0     |
| LOC644251 | 1.008  | 0     |
| LOC644253 | 1.272  | 0.4   |
| LOC644256 | 1.573  | 1.66  |
| LOC644261 | 0.923  | 0.45  |
| LOC644264 | 1.556  | 0.21  |
| LOC644265 | 0.261  | 0.97  |
| LOC644269 | 14.45  | 0.05  |
| LOC644276 | 0.777  | 0     |
| LOC644277 | 1.992  | 0     |
| LOC644280 | 1.167  | 0     |
| LOC644282 | 2.645  | 0.19  |
| LOC644285 | 2.484  | 0.17  |
| LOC644295 | 0.759  | 3.88  |
| LOC644297 | 2.176  | 0.46  |
| LOC644302 | 0.609  | 0.14  |
| LOC644303 | 2.558  | 0     |
| LOC644310 | 0.192  | 14.48 |
| LOC644315 | 0.72   | 16.38 |
| LOC644325 | 2.072  | 0     |
| LOC644328 | 1.567  | 0.75  |
| LOC644330 | 2.146  | 1.65  |
| LOC644333 | 0.776  | 5.64  |
| LOC644334 | 0.258  | 0     |
| LOC644335 | 33.018 | 0     |
| LOC644339 | 51.5   | 0     |
| LOC644350 | 0.794  | 0     |
| LOC644353 | 5.825  | 0.84  |
| LOC644354 | 0.345  | 0     |
| LOC644357 | 0.711  | 0.71  |
| LOC644361 | 0.834  | 0     |

|           |        |       |
|-----------|--------|-------|
| LOC644363 | 3.306  | 1.27  |
| LOC644366 | 0.589  | 0     |
| LOC644368 | 0.786  | 0     |
| LOC644369 | 11.833 | 0.01  |
| LOC644378 | 1.176  | 0     |
| LOC644383 | 5.139  | 0.1   |
| LOC644384 | 0.526  | 0     |
| LOC644387 | 1.619  | 0.47  |
| LOC644390 | 6.15   | 11.38 |
| LOC644397 | 2.718  | 0.06  |
| LOC644402 | 0.429  | 0     |
| LOC644403 | 1.194  | 0.07  |
| LOC644410 | 1.035  | 0     |
| LOC644415 | 0.837  | 0     |
| LOC644419 | 0.195  | 0     |
| LOC644422 | 1.445  | 24.02 |
| LOC644425 | 0.485  | 0.69  |
| LOC644429 | 2.565  | 0     |
| LOC644431 | 0.42   | 0     |
| LOC644436 | 1.34   | 0.19  |
| LOC644442 | 0.607  | 0.55  |
| LOC644445 | 1.584  | 0     |
| LOC644449 | 1.132  | 0     |
| LOC644451 | 2.116  | 0.52  |
| LOC644456 | 2.12   | 15.93 |
| LOC644459 | 9.664  | 0.08  |
| LOC644462 | 2.215  | 1.52  |
| LOC644464 | 1.03   | 1.88  |
| LOC644467 | 43.402 | 0     |
| LOC644472 | 0.963  | 0.26  |
| LOC644477 | 0.492  | 0     |
| LOC644482 | 0.243  | 0.7   |
| LOC644484 | 2.079  | 0     |
| LOC644489 | 0.547  | 0     |
| LOC644491 | 6.54   | 0.24  |
| LOC644495 | 4.245  | 0.18  |
| LOC644496 | 8.191  | 0     |
| LOC644497 | 0.69   | 0     |
| LOC644498 | 0.444  | 0.76  |
| LOC644500 | 0.789  | 0     |
| LOC644502 | 0.59   | 0.57  |
| LOC644504 | 0.282  | 0.3   |
| LOC644509 | 1.993  | 0     |
| LOC644511 | 0.587  | 68.45 |
| LOC644517 | 12.366 | 0.04  |
| LOC644518 | 11.775 | 0     |
| LOC644522 | 9.64   | 0.11  |
| LOC644524 | 1.687  | 0     |
| LOC644525 | 0.677  | 0     |
| LOC644528 | 0.939  | 0     |

|           |         |       |
|-----------|---------|-------|
| LOC644534 | 0.303   | 1.11  |
| LOC644538 | 1.612   | 0     |
| LOC644540 | 0.348   | 0     |
| LOC644541 | 0.43    | 0     |
| LOC644548 | 0.735   | 1.49  |
| LOC644554 | 0.674   | 0     |
| LOC644556 | 1.041   | 2.18  |
| LOC644557 | 15.885  | 0     |
| LOC644558 | 0.831   | 0     |
| LOC644563 | 11.057  | 0.72  |
| LOC644565 | 0.324   | 0     |
| LOC644566 | 4.687   | 0.57  |
| LOC644567 | 1.572   | 0     |
| LOC644569 | 0.156   | 0.54  |
| LOC644573 | 23.97   | 0     |
| LOC644576 | 2.199   | 0     |
| LOC644578 | 0.348   | 0     |
| LOC644587 | 1.553   | 0     |
| LOC644588 | 1.193   | 6.21  |
| LOC644589 | 0.249   | 18.61 |
| LOC644590 | 0.39    | 6.48  |
| LOC644591 | 3.856   | 0     |
| LOC644592 | 0.864   | 0     |
| LOC644596 | 0.237   | 0     |
| LOC644600 | 10.961  | 0.01  |
| LOC644601 | 48.905  | 0     |
| LOC644602 | 2.358   | 0     |
| LOC644604 | 1.635   | 8.76  |
| LOC644616 | 1.144   | 0     |
| LOC644618 | 54.942  | 0     |
| LOC644619 | 69.31   | 0.08  |
| LOC644620 | 40.227  | 0.03  |
| LOC644623 | 117.217 | 0     |
| LOC644624 | 0.378   | 0     |
| LOC644632 | 4.769   | 0     |
| LOC644634 | 4.466   | 1.72  |
| LOC644637 | 2.172   | 0     |
| LOC644638 | 0.557   | 0     |
| LOC644644 | 1.128   | 0     |
| LOC644649 | 4.125   | 0.16  |
| LOC644651 | 0.612   | 0     |
| LOC644652 | 1.494   | 0     |
| LOC644653 | 19.875  | 0     |
| LOC644659 | 0.255   | 0     |
| LOC644660 | 2.041   | 0.04  |
| LOC644661 | 45.422  | 0.03  |
| LOC644662 | 1.05    | 0     |
| LOC644669 | 22.637  | 0     |
| LOC644670 | 1.956   | 0     |
| LOC644674 | 1.325   | 0     |

|           |         |       |
|-----------|---------|-------|
| LOC644681 | 0.288   | 0     |
| LOC644682 | 0.27    | 0     |
| LOC644684 | 9.502   | 0     |
| LOC644691 | 0.222   | 0     |
| LOC644693 | 6.033   | 1.74  |
| LOC644694 | 2.089   | 0     |
| LOC644695 | 0.373   | 0     |
| LOC644697 | 2.192   | 0     |
| LOC644701 | 0.864   | 3.42  |
| LOC644704 | 1.368   | 0     |
| LOC644711 | 1.104   | 0     |
| LOC644714 | 3.156   | 53.01 |
| LOC644717 | 1.23    | 0     |
| LOC644718 | 0.702   | 0     |
| LOC644721 | 0.75    | 0     |
| LOC644723 | 0.529   | 0.31  |
| LOC644727 | 2.242   | 0.26  |
| LOC644728 | 1.977   | 0     |
| LOC644730 | 0.574   | 0     |
| LOC644732 | 3.234   | 0     |
| LOC644734 | 189.212 | 0     |
| LOC644739 | 4.444   | 5.47  |
| LOC644743 | 1.569   | 0     |
| LOC644745 | 2.379   | 4.71  |
| LOC644746 | 5.714   | 0     |
| LOC644749 | 0.285   | 0     |
| LOC644753 | 0.446   | 0     |
| LOC644754 | 0.552   | 2.29  |
| LOC644755 | 0.264   | 0     |
| LOC644756 | 1.929   | 0     |
| LOC644758 | 2.068   | 0     |
| LOC644759 | 6.21    | 0.01  |
| LOC644761 | 1.509   | 1.62  |
| LOC644762 | 1.591   | 2.75  |
| LOC644764 | 0.318   | 0     |
| LOC644768 | 50.749  | 0     |
| LOC644773 | 1.338   | 0     |
| LOC644776 | 1.148   | 0.37  |
| LOC644777 | 7.768   | 0     |
| LOC644779 | 0.435   | 0.2   |
| LOC644780 | 28.39   | 0     |
| LOC644787 | 0.498   | 0     |
| LOC644790 | 0.507   | 3.16  |
| LOC644791 | 0.585   | 1.73  |
| LOC644794 | 0.618   | 1.22  |
| LOC644800 | 2.805   | 0.87  |
| LOC644811 | 6.212   | 0     |
| LOC644813 | 0.783   | 0     |
| LOC644816 | 0.222   | 3.03  |
| LOC644817 | 6.142   | 2.25  |

|           |        |        |
|-----------|--------|--------|
| LOC644822 | 51.808 | 0.04   |
| LOC644827 | 0.279  | 0.6    |
| LOC644828 | 0.711  | 0      |
| LOC644835 | 0.603  | 0      |
| LOC644838 | 0.571  | 0.14   |
| LOC644841 | 4.016  | 0      |
| LOC644844 | 0.534  | 0      |
| LOC644850 | 1.009  | 2.34   |
| LOC644852 | 3.246  | 0      |
| LOC644854 | 4.915  | 0.77   |
| LOC644860 | 2.48   | 0      |
| LOC644862 | 0.21   | 0      |
| LOC644868 | 2.268  | 0.22   |
| LOC644870 | 3.338  | 0.28   |
| LOC644871 | 4.257  | 0.12   |
| LOC644877 | 1.042  | 13.9   |
| LOC644879 | 0.866  | 9.04   |
| LOC644881 | 0.802  | 0.42   |
| LOC644885 | 0.843  | 0.4    |
| LOC644889 | 0.515  | 0      |
| LOC644892 | 1.722  | 0.78   |
| LOC644893 | 0.954  | 0      |
| LOC644896 | 0.79   | 0.96   |
| LOC644899 | 1.023  | 0      |
| LOC644906 | 0.98   | 1.2    |
| LOC644909 | 51.151 | 0.48   |
| LOC644911 | 0.642  | 5.24   |
| LOC644914 | 1.04   | 1.54   |
| LOC644915 | 1.288  | 0.33   |
| LOC644924 | 56.141 | 0.02   |
| LOC644925 | 1.558  | 0      |
| LOC644926 | 0.159  | 0      |
| LOC644931 | 0.357  | 0      |
| LOC644934 | 0.447  | 0.19   |
| LOC644935 | 1.04   | 0.65   |
| LOC644936 | 4.282  | 3.23   |
| LOC644937 | 0.432  | 10.53  |
| LOC644941 | 0.695  | 0      |
| LOC644943 | 2.651  | 5.94   |
| LOC644949 | 2.046  | 0.16   |
| LOC644950 | 0.407  | 0      |
| LOC644953 | 0.921  | 0      |
| LOC644961 | 4.243  | 11.21  |
| LOC644969 | 0.672  | 182.76 |
| LOC644972 | 0.867  | 6.02   |
| LOC644974 | 1.604  | 0.16   |
| LOC644976 | 0.526  | 0      |
| LOC644978 | 0.672  | 0      |
| LOC644979 | 2.055  | 0      |
| LOC644982 | 3.609  | 0      |

|           |        |      |
|-----------|--------|------|
| LOC644988 | 5.309  | 0.29 |
| LOC644990 | 1.071  | 0    |
| LOC644992 | 0.312  | 0.54 |
| LOC644993 | 0.451  | 4.48 |
| LOC644994 | 1.014  | 0    |
| LOC644996 | 0.403  | 0    |
| LOC644998 | 5.002  | 0    |
| LOC645000 | 6.028  | 11.4 |
| LOC645001 | 2.891  | 0.29 |
| LOC645003 | 2.049  | 0    |
| LOC645015 | 1.821  | 0.04 |
| LOC645018 | 1.6    | 3.26 |
| LOC645023 | 0.51   | 1.16 |
| LOC645024 | 0.83   | 0.41 |
| LOC645027 | 13.885 | 0    |
| LOC645030 | 0.386  | 0    |
| LOC645037 | 0.542  | 0    |
| LOC645045 | 1.017  | 0.42 |
| LOC645047 | 3.932  | 0    |
| LOC645053 | 0.371  | 4.09 |
| LOC645054 | 0.856  | 0.2  |
| LOC645065 | 1.37   | 0.31 |
| LOC645086 | 1.496  | 6.03 |
| LOC645088 | 0.549  | 0    |
| LOC645089 | 1.62   | 0    |
| LOC645090 | 2.496  | 0    |
| LOC645094 | 0.507  | 9.63 |
| LOC645097 | 39.349 | 0.04 |
| LOC645101 | 0.596  | 1.84 |
| LOC645108 | 0.638  | 0.14 |
| LOC645118 | 0.21   | 0    |
| LOC645120 | 4.715  | 0.21 |
| LOC645125 | 26.327 | 0.15 |
| LOC645126 | 0.201  | 0    |
| LOC645129 | 1.622  | 0.42 |
| LOC645132 | 22.845 | 0.03 |
| LOC645135 | 3.868  | 0.02 |
| LOC645136 | 0.246  | 0    |
| LOC645137 | 3.389  | 0    |
| LOC645139 | 1.671  | 9.93 |
| LOC645145 | 0.378  | 0    |
| LOC645146 | 0.496  | 0    |
| LOC645149 | 0.222  | 0    |
| LOC645157 | 0.516  | 0    |
| LOC645158 | 2.013  | 0.37 |
| LOC645159 | 0.798  | 0    |
| LOC645161 | 0.84   | 0.3  |
| LOC645162 | 41.631 | 0    |
| LOC645163 | 3.102  | 0    |
| LOC645166 | 0.818  | 0.51 |

|           |        |       |
|-----------|--------|-------|
| LOC645173 | 0.948  | 2.58  |
| LOC645174 | 0.557  | 0.6   |
| LOC645175 | 1.45   | 0.7   |
| LOC645177 | 1.506  | 0.11  |
| LOC645180 | 1.656  | 0.1   |
| LOC645181 | 0.75   | 1.58  |
| LOC645183 | 1.128  | 0     |
| LOC645188 | 0.679  | 0     |
| LOC645195 | 2.002  | 0     |
| LOC645197 | 2.655  | 0     |
| LOC645201 | 10.871 | 0.08  |
| LOC645202 | 3.602  | 0     |
| LOC645203 | 0.345  | 36.14 |
| LOC645204 | 25.006 | 0.2   |
| LOC645207 | 4.782  | 0.62  |
| LOC645210 | 1.335  | 0     |
| LOC645212 | 1.436  | 1.76  |
| LOC645218 | 0.698  | 0     |
| LOC645220 | 0.237  | 0     |
| LOC645221 | 56.556 | 0.03  |
| LOC645225 | 0.258  | 0     |
| LOC645226 | 3.105  | 0     |
| LOC645227 | 0.456  | 0     |
| LOC645231 | 2.127  | 0     |
| LOC645233 | 3.097  | 1.12  |
| LOC645237 | 3.613  | 0.49  |
| LOC645246 | 0.975  | 0     |
| LOC645249 | 2.482  | 0     |
| LOC645251 | 47.893 | 0.01  |
| LOC645253 | 0.714  | 0     |
| LOC645256 | 0.979  | 0.17  |
| LOC645257 | 1.297  | 0.13  |
| LOC645261 | 1.889  | 0     |
| LOC645262 | 0.525  | 0     |
| LOC645264 | 3.235  | 0.47  |
| LOC645266 | 3.097  | 1.06  |
| LOC645269 | 0.378  | 0.44  |
| LOC645272 | 51.092 | 0.02  |
| LOC645273 | 0.466  | 0     |
| LOC645276 | 0.534  | 0     |
| LOC645277 | 0.731  | 0     |
| LOC645280 | 31.153 | 0     |
| LOC645282 | 0.528  | 0     |
| LOC645291 | 2.618  | 2.31  |
| LOC645292 | 2.325  | 15.91 |
| LOC645294 | 30.748 | 0.01  |
| LOC645297 | 14.758 | 0     |
| LOC645299 | 0.496  | 0     |
| LOC645301 | 6.513  | 3.1   |
| LOC645302 | 1.437  | 0     |



|           |        |       |
|-----------|--------|-------|
| LOC645306 | 23.369 | 0     |
| LOC645307 | 3.875  | 0.22  |
| LOC645311 | 23.687 | 0.04  |
| LOC645312 | 0.656  | 4.24  |
| LOC645313 | 3.75   | 0.13  |
| LOC645314 | 1.884  | 0.4   |
| LOC645317 | 1.574  | 28.41 |
| LOC645318 | 0.905  | 7.82  |
| LOC645319 | 2.882  | 0     |
| LOC645320 | 0.539  | 0     |
| LOC645321 | 2.385  | 0.04  |
| LOC645323 | 1.115  | 0     |
| LOC645324 | 3.554  | 0     |
| LOC645326 | 1.548  | 0.44  |
| LOC645328 | 3.127  | 0     |
| LOC645339 | 0.769  | 0     |
| LOC645347 | 0.934  | 0.18  |
| LOC645348 | 11.356 | 0     |
| LOC645354 | 3.232  | 0     |
| LOC645355 | 0.836  | 0     |
| LOC645357 | 0.693  | 0     |
| LOC645359 | 1.52   | 0     |
| LOC645360 | 0.675  | 0     |
| LOC645367 | 2.484  | 0     |
| LOC645368 | 0.639  | 23.6  |
| LOC645371 | 0.21   | 0     |
| LOC645373 | 0.846  | 0     |
| LOC645379 | 0.927  | 0     |
| LOC645381 | 0.603  | 8.94  |
| LOC645382 | 9.414  | 0     |
| LOC645385 | 21.039 | 0     |
| LOC645387 | 0.959  | 15.81 |
| LOC645388 | 2.449  | 0.1   |
| LOC645390 | 5.782  | 0     |
| LOC645395 | 0.846  | 0     |
| LOC645397 | 0.375  | 2.02  |
| LOC645398 | 0.856  | 0     |
| LOC645399 | 9.414  | 0     |
| LOC645402 | 1.593  | 0     |
| LOC645405 | 1.222  | 0.69  |
| LOC645412 | 2.026  | 1.08  |
| LOC645415 | 8.724  | 0     |
| LOC645417 | 0.336  | 0     |
| LOC645420 | 0.417  | 0     |
| LOC645422 | 1.107  | 1.07  |
| LOC645423 | 0.923  | 0     |
| LOC645426 | 2.949  | 0.06  |
| LOC645430 | 1.804  | 0.04  |
| LOC645431 | 2.111  | 0.32  |
| LOC645433 | 1.679  | 0     |

|           |        |      |
|-----------|--------|------|
| LOC645436 | 0.963  | 0.52 |
| LOC645440 | 0.813  | 3.42 |
| LOC645443 | 5.269  | 5.16 |
| LOC645446 | 0.605  | 0.56 |
| LOC645447 | 0.579  | 0.43 |
| LOC645448 | 1.344  | 0    |
| LOC645452 | 0.845  | 0.2  |
| LOC645453 | 2.65   | 0.35 |
| LOC645464 | 2.427  | 0    |
| LOC645466 | 1.782  | 1.66 |
| LOC645468 | 3.385  | 1.37 |
| LOC645470 | 0.543  | 0    |
| LOC645474 | 17.506 | 0.01 |
| LOC645478 | 0.519  | 0.16 |
| LOC645479 | 22.336 | 0.05 |
| LOC645481 | 0.513  | 0    |
| LOC645482 | 6.114  | 0.17 |
| LOC645485 | 2.14   | 0    |
| LOC645486 | 64.701 | 0.47 |
| LOC645489 | 0.273  | 0    |
| LOC645490 | 1.134  | 0.14 |
| LOC645495 | 0.543  | 0    |
| LOC645503 | 20.692 | 0.14 |
| LOC645504 | 0.327  | 0    |
| LOC645506 | 0.994  | 1.87 |
| LOC645508 | 0.132  | 0    |
| LOC645513 | 2.66   | 0.41 |
| LOC645515 | 1.235  | 1.84 |
| LOC645521 | 1.093  | 0    |
| LOC645527 | 1.059  | 0    |
| LOC645528 | 3.398  | 0.22 |
| LOC645529 | 1.047  | 0.24 |
| LOC645534 | 3.157  | 0    |
| LOC645538 | 1.31   | 0    |
| LOC645544 | 5.059  | 0    |
| LOC645548 | 1.826  | 0.78 |
| LOC645551 | 4.576  | 0    |
| LOC645553 | 1.644  | 0    |
| LOC645558 | 1.954  | 0    |
| LOC645560 | 0.896  | 6.86 |
| LOC645561 | 0.958  | 0    |
| LOC645565 | 0.831  | 0.41 |
| LOC645571 | 0.548  | 0.31 |
| LOC645572 | 1.954  | 0    |
| LOC645573 | 0.694  | 1.1  |
| LOC645579 | 7.719  | 3.72 |
| LOC645581 | 0.786  | 0    |
| LOC645586 | 2.462  | 0    |
| LOC645587 | 0.366  | 0    |
| LOC645590 | 0.297  | 0    |

|           |        |        |
|-----------|--------|--------|
| LOC645592 | 1.08   | 0      |
| LOC645598 | 2.744  | 0.56   |
| LOC645602 | 1.505  | 0      |
| LOC645603 | 4.667  | 0.04   |
| LOC645605 | 0.96   | 0      |
| LOC645614 | 5.607  | 0      |
| LOC645615 | 3.909  | 0.78   |
| LOC645617 | 0.924  | 1.55   |
| LOC645619 | 3.497  | 0.05   |
| LOC645620 | 1.041  | 0.41   |
| LOC645626 | 0.92   | 0      |
| LOC645627 | 0.855  | 0      |
| LOC645630 | 0.117  | 118.07 |
| LOC645634 | 14.299 | 0.04   |
| LOC645638 | 0.452  | 0      |
| LOC645641 | 0.309  | 2.18   |
| LOC645646 | 4.776  | 0.02   |
| LOC645650 | 0.522  | 0      |
| LOC645651 | 1.954  | 0      |
| LOC645652 | 0.475  | 10.82  |
| LOC645654 | 0.377  | 0.89   |
| LOC645655 | 0.555  | 0.76   |
| LOC645657 | 3.379  | 0      |
| LOC645666 | 24.799 | 0      |
| LOC645668 | 1.358  | 18.92  |
| LOC645676 | 3.116  | 1.71   |
| LOC645680 | 0.561  | 0.15   |
| LOC645682 | 1.396  | 0.06   |
| LOC645683 | 0.641  | 4.86   |
| LOC645685 | 0.66   | 0.64   |
| LOC645687 | 1.166  | 0      |
| LOC645688 | 2.338  | 0.4    |
| LOC645691 | 1.679  | 0.8    |
| LOC645693 | 1.421  | 5.39   |
| LOC645694 | 45.716 | 0      |
| LOC645700 | 0.915  | 0.18   |
| LOC645704 | 54.064 | 0.1    |
| LOC645705 | 0.276  | 0      |
| LOC645715 | 1.697  | 4.57   |
| LOC645716 | 0.507  | 0      |
| LOC645722 | 0.572  | 0      |
| LOC645726 | 7.746  | 0.75   |
| LOC645730 | 1.365  | 0      |
| LOC645733 | 0.901  | 0.28   |
| LOC645740 | 13.772 | 0.06   |
| LOC645744 | 1.254  | 8.8    |
| LOC645747 | 0.428  | 0.79   |
| LOC645749 | 4.943  | 0.1    |
| LOC645752 | 3.455  | 0.1    |
| LOC645755 | 0.636  | 0      |

|           |        |       |
|-----------|--------|-------|
| LOC645757 | 1.122  | 0.15  |
| LOC645762 | 0.49   | 0.52  |
| LOC645763 | 4.639  | 0.29  |
| LOC645769 | 2.445  | 0.03  |
| LOC645771 | 65.195 | 0.03  |
| LOC645773 | 2.713  | 0     |
| LOC645776 | 0.996  | 0     |
| LOC645781 | 1.077  | 0     |
| LOC645787 | 11.822 | 0     |
| LOC645790 | 1.658  | 0     |
| LOC645794 | 0.573  | 0.3   |
| LOC645798 | 1.213  | 0.9   |
| LOC645799 | 1.1    | 0.38  |
| LOC645804 | 31.094 | 0.01  |
| LOC645805 | 0.871  | 26.21 |
| LOC645807 | 1.894  | 14.59 |
| LOC645808 | 1.702  | 0.39  |
| LOC645809 | 0.435  | 0     |
| LOC645811 | 2.253  | 1.76  |
| LOC645817 | 0.576  | 0     |
| LOC645822 | 13.444 | 0.09  |
| LOC645830 | 0.321  | 0.53  |
| LOC645834 | 5.984  | 0     |
| LOC645836 | 1.593  | 0     |
| LOC645839 | 0.516  | 0     |
| LOC645841 | 6.527  | 0.02  |
| LOC645842 | 7.093  | 0.15  |
| LOC645843 | 1.296  | 0     |
| LOC645846 | 0.802  | 0.95  |
| LOC645847 | 0.315  | 0     |
| LOC645848 | 0.525  | 0     |
| LOC645851 | 1.052  | 1.92  |
| LOC645852 | 0.837  | 1.81  |
| LOC645853 | 0.92   | 3.38  |
| LOC645857 | 0.572  | 1.77  |
| LOC645859 | 0.435  | 0.39  |
| LOC645862 | 0.418  | 0     |
| LOC645864 | 1.011  | 0     |
| LOC645870 | 1.009  | 35.48 |
| LOC645874 | 1.287  | 3.2   |
| LOC645877 | 0.267  | 0     |
| LOC645879 | 1.954  | 0     |
| LOC645884 | 6.698  | 0.03  |
| LOC645895 | 2.103  | 0.64  |
| LOC645899 | 0.424  | 54.04 |
| LOC645900 | 6.469  | 0.03  |
| LOC645904 | 1.202  | 0.35  |
| LOC645914 | 0.468  | 0     |
| LOC645915 | 0.561  | 0     |
| LOC645916 | 3.873  | 0.48  |

|           |         |       |
|-----------|---------|-------|
| LOC645927 | 0.285   | 0     |
| LOC645930 | 0.198   | 0     |
| LOC645931 | 2.028   | 0.79  |
| LOC645932 | 1.056   | 0     |
| LOC645934 | 101.179 | 0.01  |
| LOC645936 | 4.572   | 0.88  |
| LOC645937 | 1.142   | 1.47  |
| LOC645938 | 0.845   | 6.88  |
| LOC645939 | 5.882   | 0     |
| LOC645940 | 1.251   | 1.01  |
| LOC645941 | 0.717   | 0.12  |
| LOC645944 | 3.352   | 7.03  |
| LOC645946 | 0.825   | 0     |
| LOC645947 | 0.306   | 6.88  |
| LOC645949 | 2.391   | 0     |
| LOC645950 | 0.914   | 0.46  |
| LOC645954 | 59.13   | 0.03  |
| LOC645955 | 0.448   | 0.37  |
| LOC645957 | 1.667   | 17.99 |
| LOC645958 | 1.67    | 70.26 |
| LOC645960 | 6.958   | 0.12  |
| LOC645961 | 19.569  | 0     |
| LOC645962 | 0.469   | 0.18  |
| LOC645964 | 0.968   | 0     |
| LOC645965 | 1.434   | 6.87  |
| LOC645966 | 0.738   | 0.46  |
| LOC645967 | 1.206   | 0.07  |
| LOC645968 | 0.793   | 1.17  |
| LOC645969 | 0.492   | 13.7  |
| LOC645971 | 0.837   | 0.1   |
| LOC645973 | 0.808   | 0     |
| LOC645978 | 2.83    | 0.15  |
| LOC645979 | 0.437   | 0.38  |
| LOC645980 | 34.123  | 0.01  |
| LOC645984 | 2.8     | 0.27  |
| LOC645987 | 0.384   | 0     |
| LOC645991 | 0.384   | 0     |
| LOC646004 | 0.585   | 0     |
| LOC646012 | 0.42    | 0.2   |
| LOC646013 | 0.418   | 6.25  |
| LOC646014 | 0.303   | 1.11  |
| LOC646016 | 51.106  | 0     |
| LOC646019 | 0.792   | 0.64  |
| LOC646021 | 1.031   | 4.25  |
| LOC646022 | 2.204   | 4.13  |
| LOC646024 | 5.856   | 0     |
| LOC646030 | 2.434   | 0.1   |
| LOC646031 | 2.376   | 0     |
| LOC646034 | 0.42    | 0     |
| LOC646035 | 0.489   | 0     |

|           |        |       |
|-----------|--------|-------|
| LOC646037 | 1.761  | 0     |
| LOC646040 | 1.221  | 0.07  |
| LOC646043 | 1.198  | 0.29  |
| LOC646044 | 3.344  | 1.34  |
| LOC646048 | 10.095 | 0.69  |
| LOC646049 | 0.273  | 0     |
| LOC646050 | 1.316  | 0.38  |
| LOC646051 | 0.453  | 0.37  |
| LOC646052 | 3.001  | 0.03  |
| LOC646053 | 3.508  | 0.24  |
| LOC646056 | 0.438  | 1.92  |
| LOC646057 | 0.903  | 0     |
| LOC646058 | 2.34   | 0     |
| LOC646065 | 0.738  | 0     |
| LOC646066 | 0.597  | 0     |
| LOC646070 | 0.465  | 0     |
| LOC646071 | 1.844  | 0     |
| LOC646074 | 2.459  | 0     |
| LOC646077 | 0.159  | 0     |
| LOC646079 | 1.25   | 0     |
| LOC646080 | 1.871  | 1.39  |
| LOC646085 | 1.315  | 0     |
| LOC646086 | 1.444  | 2.97  |
| LOC646087 | 0.68   | 0     |
| LOC646090 | 52.169 | 0     |
| LOC646091 | 3.38   | 0     |
| LOC646093 | 4.736  | 0.08  |
| LOC646096 | 0.807  | 0.21  |
| LOC646098 | 0.315  | 0     |
| LOC646103 | 0.597  | 0     |
| LOC646104 | 0.399  | 3.38  |
| LOC646106 | 0.135  | 13.72 |
| LOC646108 | 0.583  | 1.16  |
| LOC646112 | 2.123  | 0.64  |
| LOC646114 | 13.966 | 0.02  |
| LOC646118 | 0.68   | 6.44  |
| LOC646119 | 0.627  | 1.34  |
| LOC646120 | 0.745  | 0     |
| LOC646127 | 32.694 | 0.03  |
| LOC646130 | 0.645  | 0     |
| LOC646132 | 0.651  | 0     |
| LOC646139 | 2.358  | 0     |
| LOC646140 | 0.74   | 0     |
| LOC646158 | 1.197  | 0     |
| LOC646160 | 0.216  | 0     |
| LOC646161 | 2.298  | 0.25  |
| LOC646163 | 0.216  | 0     |
| LOC646164 | 2.965  | 0     |
| LOC646170 | 0.834  | 0     |
| LOC646171 | 2.811  | 0.93  |

|           |        |        |
|-----------|--------|--------|
| LOC646173 | 0.693  | 0      |
| LOC646174 | 0.904  | 0      |
| LOC646175 | 0.35   | 0      |
| LOC646177 | 0.933  | 0      |
| LOC646182 | 0.384  | 0      |
| LOC646184 | 0.183  | 0      |
| LOC646187 | 2.856  | 0.03   |
| LOC646189 | 0.531  | 1.74   |
| LOC646192 | 0.687  | 0      |
| LOC646195 | 0.648  | 954.54 |
| LOC646196 | 2.744  | 0.31   |
| LOC646197 | 10.647 | 0      |
| LOC646201 | 1.182  | 0      |
| LOC646202 | 17.155 | 0.59   |
| LOC646203 | 0.716  | 3.53   |
| LOC646208 | 1.038  | 0.16   |
| LOC646213 | 0.258  | 3.59   |
| LOC646214 | 6.629  | 2.24   |
| LOC646215 | 1.287  | 0      |
| LOC646216 | 1.924  | 0.43   |
| LOC646218 | 1.67   | 0.15   |
| LOC646220 | 1.131  | 1.78   |
| LOC646231 | 0.992  | 0.17   |
| LOC646236 | 0.57   | 0.44   |
| LOC646237 | 0.324  | 0      |
| LOC646243 | 8.309  | 0      |
| LOC646252 | 0.303  | 0      |
| LOC646253 | 4.973  | 0.02   |
| LOC646254 | 1.992  | 0      |
| LOC646255 | 1      | 4.55   |
| LOC646256 | 0.588  | 0      |
| LOC646260 | 0.258  | 0      |
| LOC646261 | 1.295  | 0.13   |
| LOC646262 | 1.989  | 0      |
| LOC646269 | 0.81   | 43.47  |
| LOC646270 | 6.902  | 0.27   |
| LOC646272 | 0.219  | 5.39   |
| LOC646273 | 1.128  | 0      |
| LOC646274 | 46.883 | 0.02   |
| LOC646278 | 25.396 | 0      |
| LOC646279 | 0.59   | 9.85   |
| LOC646282 | 20.603 | 0.13   |
| LOC646285 | 0.84   | 0.9    |
| LOC646289 | 4.59   | 0      |
| LOC646290 | 4.497  | 0      |
| LOC646292 | 29.2   | 0      |
| LOC646294 | 0.946  | 4.63   |
| LOC646300 | 1.98   | 0      |
| LOC646301 | 2.659  | 0      |
| LOC646314 | 9.495  | 0.02   |

|           |        |       |
|-----------|--------|-------|
| LOC646316 | 2.85   | 0.09  |
| LOC646317 | 0.879  | 0     |
| LOC646322 | 5.843  | 0     |
| LOC646323 | 4.459  | 0     |
| LOC646324 | 0.706  | 0     |
| LOC646329 | 2.23   | 0.19  |
| LOC646330 | 9.46   | 0.11  |
| LOC646338 | 0.814  | 2.48  |
| LOC646340 | 15.818 | 0.01  |
| LOC646344 | 74.034 | 0.01  |
| LOC646346 | 6.222  | 0.11  |
| LOC646347 | 1.69   | 3.09  |
| LOC646348 | 0.213  | 26.89 |
| LOC646352 | 0.513  | 0     |
| LOC646357 | 0.479  | 0     |
| LOC646358 | 0.138  | 0     |
| LOC646359 | 1.514  | 0.17  |
| LOC646362 | 0.52   | 0.16  |
| LOC646363 | 0.723  | 0     |
| LOC646365 | 0.708  | 2.38  |
| LOC646366 | 0.486  | 0     |
| LOC646370 | 6.384  | 0.02  |
| LOC646373 | 7.365  | 0.03  |
| LOC646377 | 3.889  | 0     |
| LOC646378 | 1.804  | 0.42  |
| LOC646379 | 0.889  | 0     |
| LOC646382 | 5.824  | 0.01  |
| LOC646388 | 0.21   | 0.4   |
| LOC646392 | 0.543  | 2.48  |
| LOC646395 | 0.624  | 0     |
| LOC646396 | 26.249 | 0.03  |
| LOC646405 | 0.508  | 0     |
| LOC646407 | 0.237  | 0     |
| LOC646408 | 0.15   | 0     |
| LOC646410 | 0.822  | 0     |
| LOC646411 | 8.569  | 0     |
| LOC646417 | 0.467  | 0.54  |
| LOC646425 | 73.998 | 0.02  |
| LOC646430 | 2.122  | 0     |
| LOC646434 | 2.018  | 0.71  |
| LOC646437 | 0.726  | 0     |
| LOC646438 | 0.408  | 0     |
| LOC646439 | 0.348  | 0     |
| LOC646440 | 27.639 | 0.03  |
| LOC646442 | 0.774  | 0.76  |
| LOC646446 | 0.42   | 0.2   |
| LOC646448 | 0.657  | 0.26  |
| LOC646449 | 0.504  | 0     |
| LOC646450 | 1.604  | 2     |
| LOC646457 | 1.107  | 0     |



|           |        |       |
|-----------|--------|-------|
| LOC646462 | 0.315  | 0     |
| LOC646463 | 0.342  | 4.44  |
| LOC646467 | 0.916  | 0.09  |
| LOC646470 | 0.741  | 0.34  |
| LOC646471 | 2.81   | 0.42  |
| LOC646472 | 21.677 | 0.02  |
| LOC646476 | 0.794  | 0.53  |
| LOC646479 | 42.032 | 0     |
| LOC646482 | 1.674  | 0     |
| LOC646483 | 0.919  | 34.74 |
| LOC646484 | 3.408  | 0     |
| LOC646485 | 0.264  | 1.6   |
| LOC646486 | 0.423  | 0     |
| LOC646489 | 20.555 | 0.21  |
| LOC64649  | 0.469  | 0     |
| LOC646493 | 0.607  | 0     |
| LOC646496 | 0.642  | 0.79  |
| LOC646498 | 0.621  | 0     |
| LOC64650  | 0.42   | 0     |
| LOC646500 | 0.693  | 0     |
| LOC646505 | 0.171  | 1.48  |
| LOC646506 | 2.257  | 0     |
| LOC646507 | 0.933  | 0     |
| LOC646508 | 0.939  | 0     |
| LOC646509 | 0.726  | 1.97  |
| LOC646510 | 1.017  | 0.42  |
| LOC646517 | 4.313  | 1.41  |
| LOC646520 | 0.69   | 0     |
| LOC646522 | 1.445  | 0     |
| LOC646526 | 0.621  | 0.27  |
| LOC646527 | 0.793  | 1.49  |
| LOC646531 | 19.922 | 1.19  |
| LOC646532 | 12.163 | 2.65  |
| LOC646535 | 1.725  | 0.14  |
| LOC646538 | 12.776 | 0.02  |
| LOC646543 | 0.986  | 0     |
| LOC646547 | 18.16  | 0.65  |
| LOC646548 | 2.469  | 0.03  |
| LOC646555 | 4.161  | 1.8   |
| LOC646556 | 0.267  | 0     |
| LOC646557 | 3.469  | 0.08  |
| LOC646560 | 1.01   | 0.59  |
| LOC646561 | 2.847  | 0.5   |
| LOC646565 | 57.257 | 0.01  |
| LOC646566 | 0.29   | 2.32  |
| LOC646567 | 0.58   | 0.15  |
| LOC646569 | 0.384  | 0     |
| LOC646570 | 1.218  | 0     |
| LOC646572 | 1.587  | 5.94  |
| LOC646574 | 0.93   | 1.09  |

|           |        |      |
|-----------|--------|------|
| LOC646575 | 5.727  | 0    |
| LOC646576 | 1.368  | 0.43 |
| LOC646577 | 0.625  | 0.14 |
| LOC646578 | 0.693  | 1.83 |
| LOC646579 | 0.6    | 0.42 |
| LOC646581 | 0.27   | 0    |
| LOC646583 | 0.835  | 0.31 |
| LOC646584 | 0.6    | 0    |
| LOC646585 | 0.807  | 0    |
| LOC646587 | 3.492  | 0.14 |
| LOC646588 | 3.74   | 0.04 |
| LOC646590 | 0.497  | 0    |
| LOC646595 | 0.513  | 0.82 |
| LOC646596 | 0.186  | 0    |
| LOC646597 | 0.632  | 0.66 |
| LOC646603 | 0.846  | 0    |
| LOC646604 | 0.558  | 0    |
| LOC646608 | 2.298  | 0    |
| LOC646609 | 13.915 | 0.02 |
| LOC646610 | 20.633 | 0    |
| LOC646612 | 49.697 | 0.08 |
| LOC646614 | 1.96   | 2.24 |
| LOC646616 | 1.339  | 1.64 |
| LOC646619 | 0.147  | 0    |
| LOC646620 | 3.722  | 0.18 |
| LOC646625 | 0.96   | 0    |
| LOC646626 | 0.748  | 0.11 |
| LOC646628 | 0.387  | 1.09 |
| LOC646629 | 0.501  | 0    |
| LOC646639 | 1.062  | 0.48 |
| LOC646640 | 3.219  | 0    |
| LOC646641 | 0.724  | 0    |
| LOC646643 | 2.037  | 0.13 |
| LOC646644 | 0.648  | 4.16 |
| LOC646649 | 0.612  | 0.42 |
| LOC646654 | 0.444  | 0.19 |
| LOC646658 | 2.266  | 0    |
| LOC646666 | 0.808  | 0    |
| LOC646667 | 1.479  | 0    |
| LOC646670 | 2.097  | 0    |
| LOC646672 | 0.633  | 2.13 |
| LOC646674 | 1.261  | 2.21 |
| LOC646675 | 0.432  | 8.39 |
| LOC646677 | 0.351  | 2.64 |
| LOC646685 | 0.458  | 0.92 |
| LOC646688 | 1.378  | 2.44 |
| LOC646693 | 3.382  | 0    |
| LOC646696 | 1.168  | 1.51 |
| LOC646698 | 0.975  | 0    |
| LOC646700 | 1.026  | 0    |

|           |         |        |
|-----------|---------|--------|
| LOC646702 | 15.572  | 0      |
| LOC646709 | 1.432   | 0.53   |
| LOC646710 | 6.872   | 1.27   |
| LOC646712 | 0.47    | 0      |
| LOC646719 | 2.85    | 2.48   |
| LOC646720 | 0.994   | 0      |
| LOC646721 | 63.83   | 0.31   |
| LOC646723 | 1.292   | 0.13   |
| LOC646730 | 0.864   | 0      |
| LOC646735 | 3.183   | 0      |
| LOC646736 | 1.355   | 0      |
| LOC646737 | 1.466   | 0.29   |
| LOC646745 | 0.621   | 0      |
| LOC646746 | 1.026   | 0      |
| LOC646749 | 3.114   | 0      |
| LOC646751 | 0.681   | 0      |
| LOC646753 | 0.448   | 0.37   |
| LOC646754 | 1.353   | 0      |
| LOC646755 | 4.643   | 0.09   |
| LOC646756 | 1.005   | 4.28   |
| LOC646758 | 1.14    | 1.85   |
| LOC646761 | 3.515   | 0      |
| LOC646762 | 8.18    | 0.42   |
| LOC646766 | 1.004   | 54.12  |
| LOC646770 | 8.896   | 0      |
| LOC646773 | 14.009  | 0      |
| LOC646774 | 0.884   | 0      |
| LOC646778 | 2.194   | 3.92   |
| LOC646779 | 0.415   | 0      |
| LOC646784 | 0.976   | 0.95   |
| LOC646785 | 0.592   | 251.57 |
| LOC646787 | 0.377   | 0.67   |
| LOC646791 | 1.002   | 35.81  |
| LOC646792 | 0.879   | 0      |
| LOC646794 | 1.873   | 1.17   |
| LOC646795 | 0.627   | 0      |
| LOC646797 | 75.003  | 0      |
| LOC646799 | 1.145   | 0      |
| LOC646800 | 0.576   | 0      |
| LOC646801 | 2.198   | 0.27   |
| LOC646802 | 2.026   | 0      |
| LOC646804 | 1.107   | 0      |
| LOC646805 | 22.255  | 0      |
| LOC646808 | 0.431   | 4.1    |
| LOC646810 | 19.477  | 0.01   |
| LOC646813 | 125.276 | 0      |
| LOC646817 | 1.808   | 1.63   |
| LOC646819 | 0.464   | 28.87  |
| LOC646820 | 2.1     | 0.56   |
| LOC646821 | 0.459   | 0.73   |

|           |        |        |
|-----------|--------|--------|
| LOC646823 | 0.834  | 0.1    |
| LOC646828 | 22.8   | 0      |
| LOC646836 | 0.24   | 10.88  |
| LOC646837 | 3.153  | 15.28  |
| LOC646839 | 43.369 | 0.24   |
| LOC646841 | 0.375  | 1.35   |
| LOC646842 | 38.885 | 0      |
| LOC646845 | 0.609  | 0.14   |
| LOC646849 | 0.805  | 0      |
| LOC646851 | 2.191  | 0      |
| LOC646853 | 0.273  | 0.61   |
| LOC646854 | 0.837  | 0      |
| LOC646860 | 11.312 | 0      |
| LOC646862 | 1.116  | 0      |
| LOC646863 | 0.357  | 0      |
| LOC646864 | 1.956  | 0.17   |
| LOC646869 | 1.347  | 0      |
| LOC646870 | 1.659  | 0.41   |
| LOC646871 | 1.162  | 0.43   |
| LOC646873 | 0.432  | 4.09   |
| LOC646874 | 1.479  | 2.05   |
| LOC646875 | 1.247  | 0.14   |
| LOC646877 | 3.112  | 0      |
| LOC646879 | 0.504  | 0      |
| LOC646880 | 11.657 | 0.01   |
| LOC646884 | 1.253  | 0.07   |
| LOC646886 | 0.414  | 0.2    |
| LOC646890 | 3.698  | 0.78   |
| LOC646891 | 8.861  | 0.32   |
| LOC646895 | 0.582  | 2.17   |
| LOC646902 | 0.969  | 0.17   |
| LOC646903 | 1.978  | 0.25   |
| LOC646907 | 9.297  | 0.01   |
| LOC646908 | 1.153  | 0      |
| LOC646909 | 0.554  | 0.76   |
| LOC646910 | 1.677  | 0      |
| LOC646912 | 5.08   | 0.02   |
| LOC646913 | 1.419  | 0.3    |
| LOC646915 | 2.942  | 0      |
| LOC646929 | 33.397 | 0      |
| LOC646932 | 1.035  | 0      |
| LOC646934 | 12.82  | 0.76   |
| LOC646936 | 1.538  | 0      |
| LOC646938 | 1.84   | 0.37   |
| LOC646939 | 1.593  | 0      |
| LOC646942 | 0.502  | 1      |
| LOC646945 | 0.336  | 1      |
| LOC646947 | 1.429  | 18.57  |
| LOC646949 | 0.495  | 726.48 |
| LOC646951 | 1.383  | 0      |

|           |        |        |
|-----------|--------|--------|
| LOC646953 | 0.234  | 0      |
| LOC646954 | 6.058  | 0.87   |
| LOC646956 | 5.23   | 0.13   |
| LOC646960 | 1.948  | 0      |
| LOC646966 | 0.49   | 2.75   |
| LOC646970 | 1.489  | 1.53   |
| LOC646973 | 2.916  | 0.72   |
| LOC646976 | 2.238  | 0.23   |
| LOC646980 | 74.49  | 0      |
| LOC646982 | 0.402  | 0      |
| LOC646985 | 0.195  | 3.03   |
| LOC646989 | 0.423  | 0      |
| LOC646992 | 0.624  | 0.14   |
| LOC646993 | 0.627  | 1.08   |
| LOC646995 | 2.722  | 0.24   |
| LOC646999 | 0.408  | 0      |
| LOC647000 | 1.137  | 0.37   |
| LOC647001 | 1.067  | 1.97   |
| LOC647002 | 0.7    | 1.33   |
| LOC647009 | 5.14   | 1.1    |
| LOC647011 | 1.116  | 0      |
| LOC647012 | 1.853  | 0.54   |
| LOC647013 | 1.169  | 0.07   |
| LOC647015 | 1.247  | 0      |
| LOC647016 | 0.195  | 0      |
| LOC647020 | 17.6   | 0.88   |
| LOC647024 | 0.814  | 0      |
| LOC647025 | 0.423  | 0      |
| LOC647030 | 0.792  | 13.29  |
| LOC647031 | 0.393  | 0      |
| LOC647034 | 0.207  | 139.99 |
| LOC647037 | 0.252  | 0.33   |
| LOC647038 | 0.467  | 0      |
| LOC647039 | 0.596  | 0.14   |
| LOC647041 | 0.963  | 0      |
| LOC647042 | 1.606  | 0      |
| LOC647044 | 0.816  | 0      |
| LOC647047 | 9.261  | 0.95   |
| LOC647049 | 0.904  | 0      |
| LOC647051 | 0.78   | 3.24   |
| LOC647054 | 0.71   | 0      |
| LOC647055 | 1.229  | 0      |
| LOC647057 | 19.587 | 0      |
| LOC647059 | 0.18   | 0      |
| LOC647060 | 4.161  | 0      |
| LOC647065 | 1.04   | 1.86   |
| LOC647066 | 0.911  | 1.11   |
| LOC647068 | 12.186 | 0.04   |
| LOC647069 | 1.371  | 0      |
| LOC647070 | 1.019  | 4.87   |

|           |        |        |
|-----------|--------|--------|
| LOC647073 | 32.36  | 0.19   |
| LOC647074 | 0.24   | 0.35   |
| LOC647076 | 6.461  | 3.1    |
| LOC647077 | 1.515  | 0.12   |
| LOC647081 | 1.266  | 0.47   |
| LOC647082 | 0.423  | 0      |
| LOC647085 | 0.542  | 0.31   |
| LOC647086 | 1.493  | 5.47   |
| LOC647087 | 1.548  | 17.9   |
| LOC647089 | 0.681  | 0      |
| LOC647094 | 0.909  | 0.37   |
| LOC647102 | 1.074  | 0      |
| LOC647104 | 0.636  | 0      |
| LOC647109 | 0.637  | 0      |
| LOC647112 | 0.41   | 144.02 |
| LOC647121 | 52.598 | 0.03   |
| LOC647126 | 2.437  | 0      |
| LOC647131 | 1.45   | 0.76   |
| LOC647132 | 14.769 | 0.07   |
| LOC647133 | 0.21   | 0      |
| LOC647134 | 0.417  | 0      |
| LOC647135 | 1.388  | 1.58   |
| LOC647137 | 3.068  | 0      |
| LOC647138 | 0.496  | 0      |
| LOC647144 | 3.521  | 0      |
| LOC647145 | 1.65   | 0      |
| LOC647150 | 2.816  | 2.09   |
| LOC647154 | 0.332  | 0      |
| LOC647155 | 0.391  | 0.86   |
| LOC647156 | 1.338  | 0      |
| LOC647157 | 50.545 | 0      |
| LOC647158 | 0.98   | 0.08   |
| LOC647162 | 15.87  | 0      |
| LOC647163 | 0.66   | 0.38   |
| LOC647166 | 1.461  | 0      |
| LOC647167 | 1.376  | 3.8    |
| LOC647169 | 0.651  | 0      |
| LOC647174 | 1.964  | 0.08   |
| LOC647175 | 23.089 | 0      |
| LOC647176 | 0.495  | 0      |
| LOC647177 | 18.331 | 0.01   |
| LOC647187 | 47.235 | 0.02   |
| LOC647188 | 0.18   | 0      |
| LOC647189 | 1.525  | 0      |
| LOC647190 | 3.564  | 0.12   |
| LOC647194 | 0.627  | 0      |
| LOC647195 | 0.74   | 0.11   |
| LOC647201 | 3.757  | 0.04   |
| LOC647202 | 4.166  | 0.95   |
| LOC647203 | 1.166  | 0      |

|           |        |        |
|-----------|--------|--------|
| LOC647204 | 0.225  | 0      |
| LOC647208 | 20.455 | 0      |
| LOC647209 | 3.433  | 0.03   |
| LOC647211 | 48.559 | 0.01   |
| LOC647212 | 1.006  | 0      |
| LOC647215 | 1.794  | 0      |
| LOC647216 | 0.741  | 0      |
| LOC647217 | 1.604  | 0.31   |
| LOC647224 | 47.641 | 0      |
| LOC647238 | 0.402  | 0      |
| LOC647239 | 0.495  | 0.85   |
| LOC647243 | 0.507  | 0.5    |
| LOC647244 | 0.276  | 2.44   |
| LOC647247 | 0.192  | 1.32   |
| LOC647249 | 30.025 | 0      |
| LOC647250 | 0.594  | 0      |
| LOC647252 | 0.683  | 0.74   |
| LOC647253 | 2.265  | 0.6    |
| LOC647259 | 1.135  | 0      |
| LOC647262 | 0.306  | 0      |
| LOC647264 | 1.316  | 0      |
| LOC647265 | 15.037 | 0      |
| LOC647275 | 0.249  | 1.01   |
| LOC647276 | 1.46   | 441.66 |
| LOC647277 | 1.146  | 0.07   |
| LOC647278 | 0.222  | 0      |
| LOC647279 | 0.558  | 0      |
| LOC647280 | 14.699 | 0      |
| LOC647281 | 0.493  | 0      |
| LOC647285 | 0.468  | 2.34   |
| LOC647286 | 1.201  | 0.07   |
| LOC647288 | 2.672  | 0      |
| LOC647291 | 1.898  | 0      |
| LOC647298 | 3.892  | 0.04   |
| LOC647299 | 18.243 | 0.07   |
| LOC647302 | 0.31   | 45.1   |
| LOC647305 | 2.615  | 0.8    |
| LOC647307 | 1.342  | 17.26  |
| LOC647309 | 1.281  | 0      |
| LOC647310 | 0.556  | 0.76   |
| LOC647313 | 0.733  | 0      |
| LOC647315 | 0.543  | 0      |
| LOC647317 | 1.014  | 0      |
| LOC647319 | 7.122  | 0.6    |
| LOC647415 | 43.552 | 0.01   |
| LOC647500 | 1.28   | 0.53   |
| LOC647503 | 0.386  | 1.75   |
| LOC647507 | 1.119  | 0      |
| LOC647509 | 0.691  | 0      |
| LOC647520 | 1.491  | 0      |

|           |        |        |
|-----------|--------|--------|
| LOC647532 | 3.892  | 0.21   |
| LOC647540 | 3.334  | 0      |
| LOC647569 | 3.75   | 0      |
| LOC647678 | 1.782  | 0      |
| LOC647757 | 1.158  | 0      |
| LOC647942 | 0.81   | 0      |
| LOC648044 | 0.216  | 0      |
| LOC648149 | 2.989  | 0      |
| LOC648154 | 1.638  | 1.59   |
| LOC648217 | 0.771  | 117.77 |
| LOC648230 | 0.378  | 0      |
| LOC648237 | 12.591 | 0.02   |
| LOC648245 | 0.606  | 3.33   |
| LOC648282 | 1.494  | 0.23   |
| LOC648283 | 24.42  | 0.09   |
| LOC648294 | 0.471  | 6.62   |
| LOC648359 | 1.416  | 0      |
| LOC648415 | 0.303  | 0      |
| LOC648442 | 0.88   | 2.87   |
| LOC648532 | 0.86   | 0      |
| LOC648570 | 1.858  | 0      |
| LOC648603 | 0.651  | 19.15  |
| LOC648665 | 0.609  | 0      |
| LOC648708 | 8.828  | 0.06   |
| LOC648729 | 0.396  | 159.96 |
| LOC648774 | 3.685  | 0.19   |
| LOC648846 | 0.564  | 0      |
| LOC648890 | 8.558  | 0      |
| LOC648926 | 2.054  | 0      |
| LOC648927 | 0.987  | 3.58   |
| LOC648937 | 18.627 | 0.14   |
| LOC648947 | 14.479 | 0      |
| LOC648980 | 0.491  | 0      |
| LOC648987 | 3.595  | 2.13   |
| LOC649024 | 30.798 | 0.03   |
| LOC649095 | 3.498  | 0.82   |
| LOC649137 | 1.077  | 0.39   |
| LOC649159 | 1.542  | 6.44   |
| LOC649166 | 8.6    | 0.02   |
| LOC649186 | 0.603  | 0      |
| LOC649198 | 19.423 | 0      |
| LOC649201 | 1.818  | 0      |
| LOC649203 | 0.243  | 0      |
| LOC649238 | 1.389  | 0      |
| LOC649259 | 0.864  | 0      |
| LOC649264 | 0.984  | 0      |
| LOC649288 | 0.294  | 0      |
| LOC649290 | 0.606  | 0      |
| LOC649294 | 1.206  | 0      |
| LOC649307 | 4.321  | 0      |



|           |         |      |
|-----------|---------|------|
| LOC649324 | 3.233   | 0    |
| LOC649346 | 1.214   | 0    |
| LOC649352 | 1.593   | 0    |
| LOC649458 | 0.66    | 0    |
| LOC649553 | 24.662  | 0.24 |
| LOC649618 | 1.137   | 0.59 |
| LOC649671 | 0.603   | 3.07 |
| LOC649704 | 8.585   | 0.19 |
| LOC649798 | 1.557   | 0    |
| LOC649839 | 0.389   | 0.43 |
| LOC649853 | 0.33    | 0    |
| LOC649925 | 0.82    | 0    |
| LOC649946 | 0.641   | 0    |
| LOC650024 | 0.675   | 0    |
| LOC650031 | 0.495   | 0.17 |
| LOC650059 | 0.483   | 0.53 |
| LOC650083 | 0.714   | 0.12 |
| LOC650095 | 0.996   | 3.97 |
| LOC650157 | 17.418  | 0.02 |
| LOC650218 | 7.452   | 0.92 |
| LOC650226 | 161.234 | 0.01 |
| LOC650236 | 7.825   | 0    |
| LOC650340 | 0.786   | 0.11 |
| LOC650346 | 2.784   | 0    |
| LOC650363 | 0.867   | 1.07 |
| LOC650474 | 2.417   | 0    |
| LOC650531 | 11.127  | 0.03 |
| LOC650560 | 2.43    | 2.19 |
| LOC650561 | 2.004   | 0.04 |
| LOC650609 | 5.072   | 0.03 |
| LOC650612 | 0.528   | 0    |
| LOC650623 | 58.186  | 0    |
| LOC650655 | 43.616  | 0.01 |
| LOC650666 | 83.47   | 0.88 |
| LOC650708 | 0.813   | 0    |
| LOC650747 | 21.384  | 0.05 |
| LOC650767 | 2.296   | 0    |
| LOC650776 | 0.486   | 0    |
| LOC650789 | 11.937  | 0.73 |
| LOC650794 | 1.361   | 0.81 |
| LOC650823 | 1.356   | 0    |
| LOC650866 | 1.1     | 0.08 |
| LOC650901 | 1.123   | 0.83 |
| LOC650947 | 0.918   | 0.37 |
| LOC650951 | 0.475   | 0    |
| LOC651033 | 1.2     | 0    |
| LOC651042 | 45.866  | 0    |
| LOC651053 | 1.987   | 0    |
| LOC651091 | 0.726   | 0    |
| LOC651118 | 9.014   | 0.05 |

|           |        |       |
|-----------|--------|-------|
| LOC651141 | 0.147  | 0     |
| LOC651144 | 15.992 | 2.6   |
| LOC651158 | 0.453  | 0     |
| LOC651200 | 4.719  | 0     |
| LOC651258 | 5.636  | 0     |
| LOC651386 | 0.951  | 0     |
| LOC651419 | 43.729 | 0     |
| LOC651628 | 1.288  | 1.31  |
| LOC651644 | 0.92   | 0.09  |
| LOC651746 | 2.874  | 0.03  |
| LOC651868 | 0.392  | 0     |
| LOC651986 | 1.164  | 0     |
| LOC652170 | 1.727  | 0     |
| LOC652276 | 11.52  | 0.23  |
| LOC652419 | 2.858  | 0     |
| LOC652423 | 0.838  | 0.1   |
| LOC652489 | 0.786  | 0     |
| LOC652525 | 9.463  | 0.01  |
| LOC652549 | 5.937  | 1.61  |
| LOC652624 | 2.593  | 0     |
| LOC652670 | 1.032  | 0     |
| LOC652904 | 0.24   | 0.7   |
| LOC652959 | 0.812  | 0.83  |
| LOC652963 | 0.898  | 74.1  |
| LOC652964 | 0.873  | 0.29  |
| LOC652968 | 1.508  | 4.13  |
| LOC653040 | 1.74   | 0     |
| LOC653042 | 4.124  | 0     |
| LOC653050 | 4.185  | 0     |
| LOC653051 | 1.124  | 0     |
| LOC653052 | 1.086  | 1.86  |
| LOC653053 | 1.317  | 0     |
| LOC653056 | 7.242  | 0.01  |
| LOC653061 | 12.617 | 0.01  |
| LOC653069 | 0.623  | 0.27  |
| LOC653073 | 1.906  | 0.31  |
| LOC653075 | 14.444 | 0     |
| LOC653079 | 0.591  | 0     |
| LOC653080 | 3.495  | 0     |
| LOC653089 | 1.975  | 0     |
| LOC653097 | 0.578  | 0     |
| LOC653103 | 1.572  | 3.86  |
| LOC653104 | 1.059  | 0     |
| LOC653107 | 2.042  | 0     |
| LOC653108 | 3.054  | 0     |
| LOC653110 | 1.901  | 0     |
| LOC653111 | 2.163  | 0     |
| LOC653113 | 15.07  | 0.16  |
| LOC653114 | 1.652  | 0     |
| LOC653115 | 1.19   | 26.12 |

|           |        |        |
|-----------|--------|--------|
| LOC653117 | 2.229  | 0      |
| LOC653122 | 2.176  | 18.86  |
| LOC653123 | 0.372  | 0      |
| LOC653125 | 1.9    | 0      |
| LOC653135 | 3.219  | 0      |
| LOC653137 | 1.747  | 0      |
| LOC653146 | 0.231  | 0      |
| LOC653151 | 0.928  | 0      |
| LOC653155 | 0.321  | 7.35   |
| LOC653156 | 1.068  | 0.32   |
| LOC653160 | 2.3    | 1.94   |
| LOC653162 | 0.336  | 0.5    |
| LOC653163 | 0.225  | 0      |
| LOC653166 | 1.395  | 0      |
| LOC653174 | 3.99   | 0      |
| LOC653175 | 3.612  | 0.21   |
| LOC653185 | 1.858  | 0      |
| LOC653186 | 0.478  | 0.53   |
| LOC653188 | 60.253 | 0      |
| LOC653190 | 29.834 | 0      |
| LOC653192 | 1.674  | 0      |
| LOC653194 | 0.985  | 0      |
| LOC653198 | 0.66   | 0      |
| LOC653199 | 4.482  | 2.67   |
| LOC653203 | 0.542  | 0      |
| LOC653214 | 0.787  | 247.25 |
| LOC653232 | 0.749  | 109.54 |
| LOC653240 | 1.18   | 0      |
| LOC653245 | 0.444  | 0      |
| LOC653252 | 0.925  | 2.37   |
| LOC653256 | 3.571  | 0      |
| LOC653264 | 3.22   | 0      |
| LOC653265 | 0.396  | 0      |
| LOC653269 | 3.989  | 0      |
| LOC653270 | 1.748  | 0      |
| LOC653275 | 2.067  | 0      |
| LOC653276 | 0.639  | 1.72   |
| LOC653288 | 2.795  | 0      |
| LOC653303 | 1.49   | 0.85   |
| LOC653305 | 0.444  | 0      |
| LOC653314 | 0.905  | 810.06 |
| LOC653316 | 4.41   | 0      |
| LOC653322 | 2.369  | 7.68   |
| LOC653325 | 1.297  | 0.32   |
| LOC653333 | 1.268  | 0      |
| LOC653340 | 3.331  | 4.07   |
| LOC653348 | 1.983  | 0      |
| LOC653354 | 0.594  | 0.85   |
| LOC653355 | 20.635 | 0      |
| LOC653363 | 1.469  | 0      |

|           |        |       |
|-----------|--------|-------|
| LOC653364 | 0.585  | 113.9 |
| LOC653375 | 1.608  | 2.15  |
| LOC653380 | 7.136  | 0     |
| LOC653381 | 43.454 | 0.19  |
| LOC653382 | 2.112  | 0     |
| LOC653383 | 0.411  | 0     |
| LOC653390 | 39.941 | 0.04  |
| LOC653406 | 3.035  | 0     |
| LOC653414 | 11.865 | 0     |
| LOC653419 | 1.858  | 0     |
| LOC653420 | 1.877  | 0     |
| LOC653427 | 3.109  | 0     |
| LOC653428 | 1.611  | 0     |
| LOC653435 | 22.888 | 0.03  |
| LOC653436 | 47.597 | 0     |
| LOC653437 | 1.084  | 0     |
| LOC653441 | 5.386  | 5.87  |
| LOC653449 | 1.003  | 0     |
| LOC653450 | 1.527  | 1.54  |
| LOC653453 | 62.961 | 0     |
| LOC653458 | 0.502  | 0     |
| LOC653464 | 6.32   | 2.34  |
| LOC653479 | 38.233 | 0.11  |
| LOC653483 | 1.067  | 0     |
| LOC653486 | 0.436  | 0     |
| LOC653491 | 0.555  | 0     |
| LOC653492 | 22.267 | 0     |
| LOC653498 | 2.055  | 0     |
| LOC653501 | 24.631 | 0     |
| LOC653503 | 1.075  | 6.03  |
| LOC653505 | 3.854  | 0     |
| LOC653506 | 1.054  | 0     |
| LOC653510 | 35.959 | 0     |
| LOC653511 | 1.301  | 0.39  |
| LOC653513 | 1.196  | 0     |
| LOC653519 | 3.972  | 0.82  |
| LOC653520 | 0.901  | 0     |
| LOC653541 | 0.972  | 0     |
| LOC653543 | 2.669  | 0     |
| LOC653544 | 2.665  | 0     |
| LOC653545 | 2.665  | 0     |
| LOC653548 | 2.665  | 0     |
| LOC653550 | 0.662  | 0     |
| LOC653553 | 24.903 | 0.42  |
| LOC653557 | 22.058 | 0.05  |
| LOC653560 | 0.771  | 0     |
| LOC653562 | 11.293 | 0.02  |
| LOC653566 | 1.96   | 18.66 |
| LOC653567 | 3.035  | 9.16  |
| LOC653583 | 1.342  | 2.7   |

|           |        |        |
|-----------|--------|--------|
| LOC653588 | 1.024  | 1.89   |
| LOC653590 | 7.156  | 0      |
| LOC653593 | 0.381  | 0      |
| LOC653598 | 3.854  | 0      |
| LOC653606 | 2.124  | 0      |
| LOC653629 | 1.014  | 0      |
| LOC653630 | 0.643  | 0      |
| LOC653631 | 2.171  | 3.38   |
| LOC653635 | 24.608 | 0.13   |
| LOC653641 | 3.451  | 0      |
| LOC653643 | 3.455  | 0.03   |
| LOC653653 | 1.494  | 0.56   |
| LOC653656 | 0.777  | 0      |
| LOC653657 | 0.777  | 0      |
| LOC653658 | 0.462  | 726.22 |
| LOC653665 | 0.571  | 0.3    |
| LOC653677 | 1.396  | 0.18   |
| LOC653690 | 0.27   | 0      |
| LOC653695 | 0.222  | 0      |
| LOC653698 | 2.087  | 2.14   |
| LOC653707 | 96.582 | 0      |
| LOC653712 | 0.701  | 0      |
| LOC653720 | 1.899  | 0.31   |
| LOC653735 | 0.366  | 0      |
| LOC653737 | 0.604  | 0      |
| LOC653740 | 0.21   | 4.01   |
| LOC653748 | 0.642  | 0.13   |
| LOC653753 | 1.059  | 0      |
| LOC653758 | 0.881  | 3.83   |
| LOC653768 | 1.703  | 0      |
| LOC653769 | 57.612 | 0      |
| LOC653772 | 49.242 | 0      |
| LOC653773 | 0.378  | 3.56   |
| LOC653775 | 3.498  | 0      |
| LOC653781 | 3.826  | 0      |
| LOC653786 | 40.773 | 0      |
| LOC653789 | 0.366  | 0      |
| LOC653794 | 16.008 | 0.02   |
| LOC653796 | 1.285  | 12.13  |
| LOC653800 | 6.432  | 0      |
| LOC653801 | 0.982  | 0.77   |
| LOC653808 | 1.934  | 0      |
| LOC653809 | 1.657  | 0      |
| LOC653820 | 6.851  | 0.08   |
| LOC653841 | 0.555  | 0      |
| LOC653852 | 0.921  | 0.09   |
| LOC653895 | 0.171  | 0      |
| LOC654029 | 0.696  | 0.84   |
| LOC654089 | 0.138  | 0      |
| LOC654106 | 0.888  | 0      |

|           |        |       |
|-----------|--------|-------|
| LOC654119 | 0.252  | 0     |
| LOC654254 | 48.426 | 0.01  |
| LOC654337 | 0.119  | 0     |
| LOC654338 | 0.121  | 0     |
| LOC654340 | 1.761  | 2.15  |
| LOC654342 | 0.89   | 1.14  |
| LOC654346 | 1.688  | 0.05  |
| LOC654350 | 0.963  | 7.52  |
| LOC654480 | 0.627  | 76.31 |
| LOC654484 | 0.386  | 1.75  |
| LOC654485 | 0.39   | 3.02  |
| LOC654486 | 0.423  | 0     |
| LOC654487 | 1.374  | 0.49  |
| LOC654780 | 2.689  | 0     |
| LOC677762 | 1.033  | 1.63  |
| LOC723972 | 0.738  | 32.18 |
| LOC727721 | 0.545  | 0.31  |
| LOC727722 | 1.713  | 0     |
| LOC727723 | 0.558  | 0     |
| LOC727724 | 1.114  | 0     |
| LOC727725 | 1.285  | 11.54 |
| LOC727726 | 2.542  | 5.2   |
| LOC727727 | 0.839  | 0     |
| LOC727728 | 1.097  | 9.14  |
| LOC727729 | 0.837  | 0     |
| LOC727730 | 0.377  | 5.58  |
| LOC727731 | 0.724  | 0     |
| LOC727732 | 4.915  | 0     |
| LOC727733 | 1.114  | 0     |
| LOC727735 | 9.125  | 0     |
| LOC727736 | 1.993  | 0.46  |
| LOC727737 | 8.586  | 0     |
| LOC727738 | 1.241  | 0     |
| LOC727739 | 0.586  | 0     |
| LOC727741 | 6.409  | 0.58  |
| LOC727742 | 2.609  | 0     |
| LOC727743 | 0.714  | 0     |
| LOC727744 | 0.315  | 0     |
| LOC727745 | 0.576  | 0     |
| LOC727746 | 3.954  | 0     |
| LOC727747 | 0.806  | 0.21  |
| LOC727748 | 3.552  | 0     |
| LOC727749 | 0.93   | 0     |
| LOC727750 | 0.726  | 0     |
| LOC727751 | 0.941  | 0     |
| LOC727752 | 1.294  | 0     |
| LOC727753 | 5.119  | 0     |
| LOC727754 | 1.824  | 0     |
| LOC727755 | 2.191  | 0     |
| LOC727756 | 1.076  | 0     |

|           |        |       |
|-----------|--------|-------|
| LOC727758 | 1.319  | 4.02  |
| LOC727759 | 2.167  | 0     |
| LOC727761 | 1.507  | 0     |
| LOC727762 | 1.978  | 0     |
| LOC727764 | 1.979  | 0     |
| LOC727767 | 1.222  | 0     |
| LOC727768 | 1.642  | 0.26  |
| LOC727769 | 0.495  | 1.19  |
| LOC727770 | 33.17  | 0.01  |
| LOC727771 | 0.54   | 0     |
| LOC727773 | 5.464  | 0     |
| LOC727775 | 2.39   | 0     |
| LOC727776 | 1.362  | 0.43  |
| LOC727777 | 0.78   | 0.43  |
| LOC727778 | 7.873  | 0     |
| LOC727779 | 0.509  | 0.16  |
| LOC727780 | 0.575  | 0     |
| LOC727781 | 3.282  | 0     |
| LOC727784 | 1.222  | 0     |
| LOC727785 | 0.708  | 0     |
| LOC727786 | 0.716  | 0.12  |
| LOC727787 | 0.996  | 0     |
| LOC727788 | 3.331  | 0     |
| LOC727789 | 0.893  | 3.11  |
| LOC727791 | 2.928  | 0.03  |
| LOC727792 | 0.162  | 7.28  |
| LOC727793 | 1.416  | 0.54  |
| LOC727794 | 0.597  | 0     |
| LOC727795 | 1.227  | 0.41  |
| LOC727796 | 0.393  | 8.14  |
| LOC727797 | 3.661  | 0     |
| LOC727798 | 0.537  | 0     |
| LOC727799 | 0.978  | 0.52  |
| LOC727801 | 0.708  | 0.12  |
| LOC727802 | 0.738  | 0.23  |
| LOC727803 | 0.898  | 2.54  |
| LOC727804 | 2.06   | 1.71  |
| LOC727805 | 11.086 | 0.12  |
| LOC727806 | 32.835 | 0.01  |
| LOC727807 | 4.868  | 0     |
| LOC727808 | 1.479  | 0     |
| LOC727809 | 1.765  | 0.05  |
| LOC727810 | 0.47   | 2.51  |
| LOC727811 | 3.028  | 0     |
| LOC727812 | 0.567  | 0     |
| LOC727813 | 0.444  | 0     |
| LOC727814 | 0.432  | 0     |
| LOC727815 | 2.406  | 0.63  |
| LOC727816 | 0.735  | 12.95 |
| LOC727817 | 0.453  | 0     |

|           |        |        |
|-----------|--------|--------|
| LOC727818 | 4.506  | 0      |
| LOC727819 | 0.317  | 0      |
| LOC727820 | 8.16   | 0.24   |
| LOC727821 | 0.559  | 0.76   |
| LOC727822 | 0.84   | 0      |
| LOC727823 | 0.27   | 0      |
| LOC727824 | 1.221  | 0      |
| LOC727825 | 6.328  | 0      |
| LOC727826 | 0.565  | 1687.4 |
| LOC727827 | 0.791  | 0      |
| LOC727828 | 6.773  | 0      |
| LOC727829 | 0.636  | 0.53   |
| LOC727830 | 4.197  | 0      |
| LOC727831 | 0.637  | 6.09   |
| LOC727832 | 3.703  | 0      |
| LOC727833 | 1.527  | 0.66   |
| LOC727834 | 6.697  | 0      |
| LOC727835 | 0.788  | 0.11   |
| LOC727836 | 1.603  | 0      |
| LOC727837 | 1.344  | 0      |
| LOC727838 | 0.855  | 0      |
| LOC727839 | 4.151  | 0.43   |
| LOC727840 | 0.576  | 0      |
| LOC727841 | 0.831  | 0      |
| LOC727842 | 1.307  | 3.54   |
| LOC727843 | 1.72   | 0.98   |
| LOC727844 | 0.49   | 0      |
| LOC727845 | 0.258  | 0.65   |
| LOC727846 | 1.328  | 0.38   |
| LOC727847 | 0.522  | 0      |
| LOC727848 | 1.236  | 0      |
| LOC727849 | 0.941  | 0      |
| LOC727852 | 1.928  | 0.22   |
| LOC727853 | 0.825  | 0      |
| LOC727854 | 0.189  | 0      |
| LOC727855 | 9.61   | 0      |
| LOC727856 | 1.64   | 0      |
| LOC727857 | 1.872  | 0      |
| LOC727858 | 4.166  | 0.22   |
| LOC727859 | 20.612 | 0      |
| LOC727860 | 0.549  | 0      |
| LOC727861 | 1.515  | 0      |
| LOC727862 | 0.524  | 0      |
| LOC727863 | 0.852  | 0      |
| LOC727864 | 0.879  | 0      |
| LOC727865 | 0.711  | 2.01   |
| LOC727866 | 3.398  | 2.75   |
| LOC727867 | 1.155  | 0      |
| LOC727868 | 27.16  | 0      |
| LOC727869 | 1.117  | 3.47   |



|           |        |      |
|-----------|--------|------|
| LOC727870 | 0.548  | 0    |
| LOC727872 | 1.438  | 2.34 |
| LOC727873 | 0.567  | 0    |
| LOC727874 | 0.567  | 2.38 |
| LOC727875 | 0.879  | 0    |
| LOC727877 | 4.131  | 0    |
| LOC727878 | 0.47   | 0    |
| LOC727879 | 0.449  | 0    |
| LOC727880 | 3.938  | 0    |
| LOC727881 | 0.426  | 0    |
| LOC727882 | 9.944  | 0    |
| LOC727883 | 0.306  | 0    |
| LOC727884 | 1.729  | 3.31 |
| LOC727885 | 0.573  | 0    |
| LOC727886 | 0.555  | 0    |
| LOC727887 | 1.675  | 0.2  |
| LOC727888 | 13.231 | 0    |
| LOC727889 | 0.372  | 0    |
| LOC727890 | 1.8    | 0    |
| LOC727891 | 27.479 | 0.06 |
| LOC727892 | 0.879  | 0    |
| LOC727893 | 3.033  | 0    |
| LOC727894 | 0.312  | 0    |
| LOC727895 | 0.709  | 0.83 |
| LOC727896 | 2.697  | 0.56 |
| LOC727898 | 1.185  | 0    |
| LOC727899 | 0.554  | 0    |
| LOC727900 | 2.284  | 6.2  |
| LOC727901 | 17.065 | 0    |
| LOC727902 | 0.288  | 0    |
| LOC727903 | 0.687  | 0.25 |
| LOC727904 | 0.33   | 1.53 |
| LOC727905 | 3.621  | 0    |
| LOC727906 | 0.369  | 0    |
| LOC727907 | 0.879  | 0    |
| LOC727908 | 2.76   | 0    |
| LOC727909 | 5.11   | 0.18 |
| LOC727910 | 1.335  | 0    |
| LOC727911 | 0.426  | 0    |
| LOC727912 | 1.032  | 0    |
| LOC727913 | 0.402  | 0.21 |
| LOC727914 | 14.509 | 0.02 |
| LOC727915 | 0.478  | 0    |
| LOC727916 | 2      | 0.17 |
| LOC727917 | 0.879  | 0    |
| LOC727918 | 2.428  | 2.63 |
| LOC727920 | 0.559  | 0.45 |
| LOC727921 | 3.41   | 1.31 |
| LOC727922 | 23.002 | 0    |
| LOC727923 | 0.925  | 5.19 |

|           |        |       |
|-----------|--------|-------|
| LOC727924 | 0.554  | 0     |
| LOC727926 | 0.958  | 0.18  |
| LOC727927 | 4.124  | 0     |
| LOC727928 | 2.207  | 0.38  |
| LOC727929 | 0.874  | 11.76 |
| LOC727930 | 40.769 | 0.01  |
| LOC727931 | 0.237  | 9.24  |
| LOC727932 | 0.879  | 0     |
| LOC727933 | 0.564  | 0     |
| LOC727934 | 1.759  | 0.24  |
| LOC727935 | 0.593  | 0     |
| LOC727936 | 1.547  | 0     |
| LOC727937 | 0.615  | 0.55  |
| LOC727938 | 1.814  | 0.65  |
| LOC727939 | 0.84   | 0.2   |
| LOC727940 | 1.309  | 0     |
| LOC727941 | 66.426 | 0     |
| LOC727942 | 5.773  | 0     |
| LOC727943 | 1.296  | 0.13  |
| LOC727944 | 0.713  | 0     |
| LOC727945 | 1.684  | 0     |
| LOC727946 | 0.879  | 0     |
| LOC727947 | 0.394  | 16.04 |
| LOC727948 | 2.603  | 0     |
| LOC727949 | 0.6    | 0.28  |
| LOC727950 | 2.13   | 0     |
| LOC727951 | 1.662  | 0     |
| LOC727952 | 0.879  | 0     |
| LOC727953 | 0.362  | 0     |
| LOC727954 | 0.639  | 0     |
| LOC727955 | 0.486  | 0     |
| LOC727957 | 5.308  | 1.02  |
| LOC727958 | 0.258  | 0     |
| LOC727959 | 0.756  | 0     |
| LOC727960 | 1.852  | 0     |
| LOC727962 | 22.156 | 0.01  |
| LOC727963 | 69.624 | 0.01  |
| LOC727964 | 5.007  | 0     |
| LOC727965 | 0.843  | 0     |
| LOC727966 | 1.815  | 0     |
| LOC727967 | 2.05   | 3.57  |
| LOC727968 | 0.879  | 0     |
| LOC727969 | 0.501  | 0     |
| LOC727970 | 1.029  | 0.41  |
| LOC727971 | 0.833  | 0     |
| LOC727972 | 1.122  | 0     |
| LOC727973 | 1.06   | 0     |
| LOC727974 | 0.978  | 0     |
| LOC727975 | 0.459  | 0     |
| LOC727976 | 0.429  | 0.59  |

|           |        |       |
|-----------|--------|-------|
| LOC727977 | 1.163  | 0.51  |
| LOC727978 | 1.653  | 0.61  |
| LOC727979 | 0.879  | 0     |
| LOC727980 | 1.566  | 0.11  |
| LOC727981 | 0.54   | 0     |
| LOC727982 | 0.507  | 0     |
| LOC727983 | 2.46   | 0     |
| LOC727984 | 0.591  | 0.14  |
| LOC727985 | 1.061  | 0     |
| LOC727986 | 0.375  | 0     |
| LOC727987 | 10.621 | 0.01  |
| LOC727988 | 0.843  | 0     |
| LOC727989 | 0.579  | 0.29  |
| LOC727990 | 0.879  | 0     |
| LOC727991 | 1.372  | 0.19  |
| LOC727992 | 0.348  | 0     |
| LOC727993 | 0.526  | 0     |
| LOC727994 | 0.39   | 0     |
| LOC727995 | 0.891  | 0     |
| LOC727996 | 1.627  | 0     |
| LOC727997 | 0.423  | 0.8   |
| LOC727998 | 0.474  | 0     |
| LOC727999 | 0.545  | 0     |
| LOC728000 | 0.615  | 0     |
| LOC728001 | 0.879  | 0     |
| LOC728002 | 0.574  | 5.29  |
| LOC728003 | 12.838 | 1.67  |
| LOC728004 | 2.13   | 0     |
| LOC728006 | 1.072  | 2.2   |
| LOC728007 | 1.039  | 0     |
| LOC728008 | 1.419  | 0.77  |
| LOC728009 | 0.541  | 5.91  |
| LOC728010 | 0.607  | 0.7   |
| LOC728011 | 1.827  | 0.14  |
| LOC728012 | 1.069  | 0     |
| LOC728013 | 0.842  | 0     |
| LOC728014 | 1.141  | 1.85  |
| LOC728015 | 1.37   | 0.25  |
| LOC728016 | 0.345  | 0     |
| LOC728017 | 0.476  | 0.53  |
| LOC728018 | 0.691  | 0.48  |
| LOC728019 | 1.007  | 0.33  |
| LOC728020 | 2.085  | 0.16  |
| LOC728021 | 1.542  | 0.05  |
| LOC728022 | 2.682  | 0     |
| LOC728023 | 0.387  | 19.37 |
| LOC728025 | 1.12   | 0.15  |
| LOC728026 | 0.33   | 1.28  |
| LOC728027 | 26.814 | 0     |
| LOC728028 | 10.768 | 0     |

|           |        |      |
|-----------|--------|------|
| LOC728029 | 0.534  | 0    |
| LOC728030 | 1.113  | 1.14 |
| LOC728031 | 1.082  | 1.71 |
| LOC728033 | 0.588  | 0    |
| LOC728034 | 0.502  | 0    |
| LOC728035 | 0.593  | 0    |
| LOC728037 | 16.833 | 0    |
| LOC728038 | 0.525  | 0.32 |
| LOC728041 | 6.221  | 1.49 |
| LOC728043 | 0.219  | 0    |
| LOC728044 | 42.489 | 0.19 |
| LOC728045 | 0.387  | 0    |
| LOC728046 | 2.243  | 1.43 |
| LOC728047 | 5.478  | 0.05 |
| LOC728048 | 0.566  | 3.27 |
| LOC728050 | 0.351  | 0    |
| LOC728051 | 1.503  | 2.24 |
| LOC728052 | 0.863  | 0    |
| LOC728053 | 13.019 | 0.01 |
| LOC728054 | 1.99   | 0    |
| LOC728055 | 2.107  | 1.08 |
| LOC728056 | 2.735  | 0    |
| LOC728057 | 1.012  | 0    |
| LOC728058 | 1.366  | 0.68 |
| LOC728059 | 1.056  | 1.99 |
| LOC728060 | 1.005  | 3.27 |
| LOC728063 | 0.66   | 0    |
| LOC728064 | 78.345 | 0    |
| LOC728065 | 0.908  | 0    |
| LOC728066 | 1.992  | 0.63 |
| LOC728067 | 0.705  | 0    |
| LOC728068 | 1.215  | 0    |
| LOC728069 | 2.334  | 3.03 |
| LOC728071 | 2.405  | 6.97 |
| LOC728073 | 1.694  | 0    |
| LOC728074 | 0.903  | 0    |
| LOC728076 | 0.46   | 0    |
| LOC728077 | 0.723  | 0    |
| LOC728078 | 0.477  | 0    |
| LOC728079 | 0.819  | 0    |
| LOC728080 | 4.893  | 0.12 |
| LOC728083 | 1.605  | 0.53 |
| LOC728085 | 0.402  | 0    |
| LOC728086 | 0.416  | 0    |
| LOC728087 | 0.345  | 0    |
| LOC728088 | 0.65   | 3.5  |
| LOC728089 | 0.563  | 0    |
| LOC728091 | 0.585  | 0    |
| LOC728092 | 1.224  | 0    |
| LOC728093 | 3.598  | 0    |

|           |        |       |
|-----------|--------|-------|
| LOC728094 | 0.993  | 0     |
| LOC728095 | 0.548  | 0     |
| LOC728097 | 0.618  | 0     |
| LOC728098 | 12.398 | 0.54  |
| LOC728099 | 3.809  | 0.03  |
| LOC728100 | 3.609  | 0     |
| LOC728101 | 1.443  | 0.18  |
| LOC728102 | 1.878  | 0.59  |
| LOC728103 | 1.097  | 0     |
| LOC728104 | 0.754  | 0     |
| LOC728105 | 3.332  | 0.03  |
| LOC728106 | 0.716  | 0     |
| LOC728107 | 1.044  | 0.32  |
| LOC728108 | 0.342  | 0     |
| LOC728109 | 0.45   | 0     |
| LOC728110 | 1.964  | 24.45 |
| LOC728112 | 0.585  | 3.17  |
| LOC728113 | 2.036  | 0     |
| LOC728114 | 0.965  | 0     |
| LOC728115 | 0.942  | 3.13  |
| LOC728117 | 1.956  | 0     |
| LOC728118 | 4.872  | 0     |
| LOC728119 | 2.268  | 0     |
| LOC728120 | 0.66   | 0.13  |
| LOC728121 | 20.094 | 0     |
| LOC728122 | 0.362  | 0     |
| LOC728123 | 0.838  | 0     |
| LOC728124 | 0.726  | 0     |
| LOC728125 | 0.39   | 0     |
| LOC728126 | 8.963  | 0.13  |
| LOC728128 | 0.891  | 0.48  |
| LOC728129 | 0.878  | 0     |
| LOC728130 | 4.871  | 0.03  |
| LOC728131 | 1.493  | 112.9 |
| LOC728132 | 1.178  | 0     |
| LOC728133 | 0.885  | 0     |
| LOC728134 | 0.52   | 3.56  |
| LOC728135 | 0.969  | 0     |
| LOC728136 | 0.972  | 0     |
| LOC728137 | 1.16   | 0     |
| LOC728138 | 2.619  | 2.15  |
| LOC728139 | 0.899  | 2.15  |
| LOC728140 | 1.566  | 0     |
| LOC728141 | 0.3    | 0     |
| LOC728142 | 0.6    | 0.99  |
| LOC728143 | 0.503  | 0.67  |
| LOC728144 | 4.835  | 0.03  |
| LOC728145 | 2.944  | 0     |
| LOC728146 | 2.194  | 0     |
| LOC728147 | 2.31   | 0     |

|           |        |      |
|-----------|--------|------|
| LOC728148 | 0.747  | 0    |
| LOC728149 | 0.643  | 2.35 |
| LOC728150 | 0.632  | 0    |
| LOC728151 | 1.074  | 2.82 |
| LOC728152 | 0.542  | 0    |
| LOC728153 | 2.904  | 0.32 |
| LOC728154 | 0.477  | 0    |
| LOC728155 | 1.41   | 0    |
| LOC728156 | 45.677 | 0.02 |
| LOC728157 | 0.45   | 0    |
| LOC728160 | 2.643  | 0    |
| LOC728161 | 0.723  | 0    |
| LOC728162 | 1.47   | 0.23 |
| LOC728163 | 0.324  | 0    |
| LOC728164 | 0.762  | 0.33 |
| LOC728165 | 0.552  | 0    |
| LOC728166 | 0.561  | 0    |
| LOC728167 | 6.194  | 0    |
| LOC728168 | 0.714  | 0.36 |
| LOC728169 | 0.633  | 0    |
| LOC728170 | 1.336  | 0.38 |
| LOC728171 | 0.637  | 0    |
| LOC728172 | 0.402  | 0.21 |
| LOC728173 | 0.472  | 0    |
| LOC728174 | 0.488  | 0    |
| LOC728175 | 0.572  | 1.91 |
| LOC728176 | 0.835  | 2.82 |
| LOC728177 | 0.756  | 0.22 |
| LOC728178 | 1.497  | 0.17 |
| LOC728179 | 0.866  | 0.78 |
| LOC728180 | 0.627  | 0    |
| LOC728181 | 0.989  | 0    |
| LOC728182 | 0.582  | 0    |
| LOC728183 | 0.541  | 0.31 |
| LOC728184 | 1.594  | 0.74 |
| LOC728185 | 0.472  | 0.71 |
| LOC728186 | 2.446  | 0    |
| LOC728187 | 0.607  | 0.28 |
| LOC728188 | 1.696  | 0    |
| LOC728189 | 0.855  | 0    |
| LOC728190 | 1.061  | 0.79 |
| LOC728191 | 0.61   | 0    |
| LOC728192 | 0.907  | 0    |
| LOC728193 | 0.553  | 0    |
| LOC728194 | 3.106  | 0    |
| LOC728195 | 0.333  | 0    |
| LOC728196 | 1.144  | 0    |
| LOC728197 | 0.541  | 0    |
| LOC728198 | 2.689  | 0    |
| LOC728199 | 73.276 | 0    |

|           |         |      |
|-----------|---------|------|
| LOC728200 | 0.822   | 0    |
| LOC728201 | 0.414   | 0    |
| LOC728203 | 1.426   | 0    |
| LOC728204 | 9.022   | 0    |
| LOC728205 | 0.751   | 1.01 |
| LOC728206 | 635.771 | 0    |
| LOC728207 | 0.497   | 1.87 |
| LOC728208 | 0.586   | 0    |
| LOC728209 | 0.469   | 0    |
| LOC728210 | 0.753   | 0.11 |
| LOC728211 | 1.58    | 1.39 |
| LOC728212 | 1.33    | 0    |
| LOC728213 | 0.568   | 1.19 |
| LOC728214 | 0.636   | 0    |
| LOC728215 | 3.482   | 0    |
| LOC728216 | 1.627   | 0    |
| LOC728217 | 0.829   | 1.83 |
| LOC728218 | 0.76    | 0    |
| LOC728219 | 0.767   | 0    |
| LOC728220 | 0.417   | 0    |
| LOC728221 | 1.176   | 0    |
| LOC728222 | 0.545   | 0    |
| LOC728224 | 1.548   | 0    |
| LOC728225 | 30.706  | 4.46 |
| LOC728226 | 1.658   | 0    |
| LOC728227 | 1.38    | 0    |
| LOC728229 | 3.448   | 0.07 |
| LOC728230 | 0.453   | 0    |
| LOC728231 | 0.81    | 0    |
| LOC728232 | 0.342   | 0    |
| LOC728233 | 23.854  | 0.61 |
| LOC728234 | 0.261   | 0    |
| LOC728235 | 0.525   | 0    |
| LOC728236 | 0.477   | 0    |
| LOC728237 | 0.735   | 0    |
| LOC728238 | 0.872   | 3.67 |
| LOC728240 | 1.134   | 0    |
| LOC728241 | 0.567   | 0    |
| LOC728242 | 0.713   | 0    |
| LOC728243 | 8.561   | 0    |
| LOC728244 | 5.902   | 0.71 |
| LOC728245 | 0.652   | 0    |
| LOC728246 | 0.366   | 0    |
| LOC728247 | 10.671  | 0.02 |
| LOC728248 | 29.761  | 0    |
| LOC728249 | 1.187   | 0.64 |
| LOC728250 | 0.398   | 0    |
| LOC728251 | 0.435   | 0    |
| LOC728252 | 0.911   | 0.55 |
| LOC728253 | 1.627   | 0.05 |

|           |        |       |
|-----------|--------|-------|
| LOC728254 | 3.853  | 0.04  |
| LOC728255 | 0.366  | 0     |
| LOC728256 | 1.146  | 2.86  |
| LOC728257 | 4.287  | 0.06  |
| LOC728259 | 1.222  | 0     |
| LOC728260 | 0.918  | 0     |
| LOC728261 | 0.966  | 0.08  |
| LOC728262 | 1.275  | 0     |
| LOC728263 | 32.972 | 0.01  |
| LOC728264 | 1.35   | 0     |
| LOC728266 | 1.222  | 0     |
| LOC728267 | 0.294  | 0     |
| LOC728268 | 1.626  | 0     |
| LOC728269 | 1.826  | 0     |
| LOC728270 | 0.414  | 0     |
| LOC728271 | 4.106  | 0     |
| LOC728272 | 1.298  | 4.21  |
| LOC728273 | 0.645  | 0     |
| LOC728274 | 58.419 | 0     |
| LOC728275 | 1.152  | 0     |
| LOC728276 | 0.411  | 0     |
| LOC728277 | 2.145  | 0.31  |
| LOC728278 | 2.367  | 0     |
| LOC728279 | 0.436  | 0     |
| LOC728280 | 0.366  | 10.82 |
| LOC728281 | 0.516  | 0     |
| LOC728282 | 0.393  | 0     |
| LOC728284 | 0.565  | 0     |
| LOC728285 | 0.875  | 0     |
| LOC728286 | 1.296  | 0.2   |
| LOC728287 | 1.554  | 5.31  |
| LOC728288 | 1.634  | 0.36  |
| LOC728289 | 0.609  | 0     |
| LOC728290 | 0.449  | 0     |
| LOC728291 | 6.101  | 0.07  |
| LOC728292 | 0.561  | 0     |
| LOC728295 | 9.46   | 0     |
| LOC728296 | 0.201  | 0     |
| LOC728297 | 0.844  | 0     |
| LOC728298 | 1.317  | 5.37  |
| LOC728300 | 1.834  | 0.19  |
| LOC728301 | 0.451  | 0     |
| LOC728302 | 1.365  | 0     |
| LOC728303 | 0.312  | 1.08  |
| LOC728304 | 0.531  | 0     |
| LOC728305 | 0.411  | 0     |
| LOC728306 | 1.05   | 0     |
| LOC728307 | 5.805  | 0     |
| LOC728308 | 0.47   | 15.95 |
| LOC728309 | 1.663  | 0.05  |



|           |        |       |
|-----------|--------|-------|
| LOC728310 | 1.461  | 0     |
| LOC728311 | 0.24   | 0.35  |
| LOC728312 | 63.119 | 0     |
| LOC728313 | 0.306  | 0     |
| LOC728314 | 2.421  | 0.17  |
| LOC728315 | 0.797  | 0.85  |
| LOC728316 | 0.591  | 0     |
| LOC728317 | 6.087  | 0     |
| LOC728318 | 0.906  | 0     |
| LOC728319 | 0.942  | 0.09  |
| LOC728320 | 4.192  | 0     |
| LOC728321 | 0.882  | 1.24  |
| LOC728322 | 0.492  | 0.17  |
| LOC728323 | 43.757 | 0.03  |
| LOC728324 | 0.766  | 1.43  |
| LOC728325 | 0.306  | 0.83  |
| LOC728326 | 0.885  | 1.81  |
| LOC728328 | 1.287  | 0.07  |
| LOC728329 | 0.6    | 0     |
| LOC728330 | 0.216  | 0     |
| LOC728331 | 0.711  | 0     |
| LOC728332 | 1.125  | 0.15  |
| LOC728333 | 1.813  | 0.14  |
| LOC728334 | 2.275  | 0     |
| LOC728335 | 0.909  | 0     |
| LOC728336 | 0.477  | 2.29  |
| LOC728337 | 0.345  | 0     |
| LOC728338 | 1.287  | 0     |
| LOC728339 | 1.645  | 0.61  |
| LOC728340 | 4.645  | 0.29  |
| LOC728341 | 0.51   | 0     |
| LOC728342 | 0.689  | 0     |
| LOC728343 | 4.062  | 0     |
| LOC728344 | 37.346 | 0.19  |
| LOC728345 | 0.51   | 0     |
| LOC728346 | 0.797  | 0     |
| LOC728347 | 0.88   | 0     |
| LOC728348 | 0.444  | 0     |
| LOC728349 | 0.702  | 0     |
| LOC728350 | 1.376  | 15.12 |
| LOC728351 | 1.177  | 0     |
| LOC728352 | 3.112  | 0.62  |
| LOC728353 | 0.831  | 0.31  |
| LOC728354 | 0.24   | 0     |
| LOC728355 | 0.444  | 0     |
| LOC728356 | 0.456  | 0     |
| LOC728357 | 0.557  | 0     |
| LOC728358 | 0.493  | 14.87 |
| LOC728359 | 0.384  | 0     |
| LOC728360 | 0.871  | 0     |

|           |        |      |
|-----------|--------|------|
| LOC728361 | 0.84   | 0    |
| LOC728362 | 0.674  | 0.13 |
| LOC728363 | 0.681  | 1.61 |
| LOC728364 | 4.277  | 0    |
| LOC728365 | 0.171  | 0    |
| LOC728366 | 0.519  | 2.92 |
| LOC728367 | 0.279  | 9.06 |
| LOC728368 | 0.793  | 0.11 |
| LOC728369 | 1.593  | 0    |
| LOC728370 | 0.906  | 0    |
| LOC728371 | 13.562 | 0    |
| LOC728372 | 0.591  | 0.71 |
| LOC728373 | 1.593  | 0    |
| LOC728374 | 0.635  | 3.19 |
| LOC728375 | 0.591  | 0    |
| LOC728376 | 0.519  | 0    |
| LOC728377 | 5.571  | 0.44 |
| LOC728378 | 3.989  | 0.06 |
| LOC728379 | 1.593  | 0    |
| LOC728380 | 0.818  | 0.31 |
| LOC728381 | 1.773  | 0.05 |
| LOC728382 | 3.175  | 0    |
| LOC728383 | 0.518  | 0    |
| LOC728384 | 30.377 | 0    |
| LOC728385 | 0.585  | 0    |
| LOC728386 | 1.593  | 0    |
| LOC728387 | 1.119  | 0    |
| LOC728388 | 2.219  | 0    |
| LOC728389 | 0.552  | 1.53 |
| LOC728390 | 1.213  | 2.57 |
| LOC728391 | 1.498  | 3.37 |
| LOC728392 | 4.556  | 1.83 |
| LOC728393 | 1.593  | 0    |
| LOC728394 | 0.375  | 0    |
| LOC728395 | 1.178  | 0    |
| LOC728396 | 0.234  | 0    |
| LOC728397 | 1.258  | 2.68 |
| LOC728398 | 0.222  | 0    |
| LOC728399 | 0.246  | 0    |
| LOC728400 | 1.593  | 0    |
| LOC728401 | 7.009  | 0.07 |
| LOC728402 | 0.74   | 0.34 |
| LOC728403 | 1.16   | 0    |
| LOC728405 | 1.593  | 0    |
| LOC728406 | 1.533  | 0.05 |
| LOC728407 | 1.137  | 0.59 |
| LOC728408 | 1.799  | 0    |
| LOC728410 | 2.672  | 0    |
| LOC728411 | 0.732  | 0.58 |
| LOC728412 | 1.16   | 0    |

|           |        |      |
|-----------|--------|------|
| LOC728413 | 1.185  | 0    |
| LOC728414 | 0.972  | 0    |
| LOC728415 | 0.363  | 0    |
| LOC728416 | 0.486  | 0    |
| LOC728417 | 4.459  | 0.02 |
| LOC728418 | 2.46   | 0    |
| LOC728419 | 1.593  | 0    |
| LOC728420 | 0.663  | 0.25 |
| LOC728421 | 0.39   | 0    |
| LOC728422 | 0.384  | 0    |
| LOC728423 | 54.231 | 0.04 |
| LOC728424 | 5.665  | 0    |
| LOC728425 | 1.275  | 0    |
| LOC728426 | 0.327  | 0    |
| LOC728427 | 0.456  | 0    |
| LOC728428 | 0.565  | 7.16 |
| LOC728429 | 3.784  | 0    |
| LOC728430 | 1.395  | 0    |
| LOC728431 | 1.088  | 0.31 |
| LOC728432 | 0.621  | 0.41 |
| LOC728433 | 0.393  | 0    |
| LOC728435 | 0.681  | 0    |
| LOC728436 | 0.771  | 0    |
| LOC728438 | 1.627  | 0.36 |
| LOC728439 | 0.963  | 0    |
| LOC728440 | 0.681  | 0    |
| LOC728442 | 1.094  | 0    |
| LOC728443 | 0.643  | 0    |
| LOC728444 | 0.681  | 0    |
| LOC728445 | 1.357  | 0.13 |
| LOC728446 | 1.188  | 0.49 |
| LOC728447 | 1.469  | 0    |
| LOC728448 | 20.546 | 0.02 |
| LOC728449 | 1.901  | 0    |
| LOC728450 | 0.524  | 0    |
| LOC728451 | 2.004  | 0    |
| LOC728452 | 4.324  | 0    |
| LOC728453 | 0.21   | 0    |
| LOC728454 | 0.336  | 0    |
| LOC728455 | 1.047  | 0    |
| LOC728456 | 0.396  | 2.97 |
| LOC728457 | 0.681  | 0    |
| LOC728459 | 0.452  | 0    |
| LOC728460 | 0.441  | 0    |
| LOC728462 | 12.174 | 0    |
| LOC728463 | 2.105  | 0    |
| LOC728464 | 0.798  | 0    |
| LOC728465 | 0.681  | 0    |
| LOC728466 | 0.33   | 0    |
| LOC728467 | 4.263  | 3.89 |

|           |        |       |
|-----------|--------|-------|
| LOC728468 | 2.277  | 0.22  |
| LOC728469 | 2.708  | 0     |
| LOC728470 | 0.729  | 0     |
| LOC728471 | 0.756  | 0     |
| LOC728472 | 0.228  | 0     |
| LOC728473 | 1.246  | 0     |
| LOC728474 | 1.542  | 0     |
| LOC728475 | 0.426  | 0     |
| LOC728476 | 1.227  | 0     |
| LOC728477 | 3.649  | 0.03  |
| LOC728478 | 0.429  | 4.32  |
| LOC728479 | 0.663  | 0     |
| LOC728480 | 1.509  | 0     |
| LOC728481 | 7.802  | 0     |
| LOC728482 | 0.456  | 0     |
| LOC728483 | 0.357  | 0     |
| LOC728484 | 0.483  | 0.7   |
| LOC728485 | 1.918  | 0.22  |
| LOC728486 | 6.375  | 0.08  |
| LOC728487 | 0.972  | 0     |
| LOC728488 | 13.689 | 0     |
| LOC728490 | 0.768  | 0     |
| LOC728492 | 5.218  | 0.05  |
| LOC728493 | 1.042  | 0     |
| LOC728494 | 0.456  | 0     |
| LOC728495 | 1.978  | 0     |
| LOC728496 | 12.148 | 0     |
| LOC728497 | 1.104  | 0     |
| LOC728498 | 13.724 | 0.07  |
| LOC728499 | 3.505  | 0     |
| LOC728500 | 0.615  | 0     |
| LOC728501 | 0.57   | 0.29  |
| LOC728502 | 1.481  | 6.94  |
| LOC728503 | 1.015  | 0     |
| LOC728504 | 1.111  | 0.08  |
| LOC728506 | 13.578 | 0     |
| LOC728507 | 0.765  | 0     |
| LOC728508 | 1.149  | 0.08  |
| LOC728509 | 3.388  | 2.16  |
| LOC728510 | 0.518  | 0     |
| LOC728511 | 0.896  | 0.56  |
| LOC728512 | 0.39   | 51.63 |
| LOC728513 | 1.2    | 0     |
| LOC728514 | 1.266  | 0     |
| LOC728515 | 0.285  | 0.88  |
| LOC728516 | 0.412  | 0     |
| LOC728517 | 6.691  | 0     |
| LOC728518 | 1.406  | 0.3   |
| LOC728519 | 5.352  | 0     |
| LOC728520 | 1.139  | 0.08  |

|           |        |        |
|-----------|--------|--------|
| LOC728521 | 0.684  | 0      |
| LOC728522 | 1.878  | 2.74   |
| LOC728523 | 0.576  | 1.31   |
| LOC728524 | 0.798  | 0      |
| LOC728525 | 0.588  | 0      |
| LOC728526 | 3.46   | 0      |
| LOC728527 | 0.406  | 0      |
| LOC728528 | 0.459  | 0      |
| LOC728529 | 0.426  | 0      |
| LOC728530 | 0.926  | 0.18   |
| LOC728531 | 0.714  | 0.47   |
| LOC728532 | 19.929 | 1.01   |
| LOC728533 | 2.377  | 6.02   |
| LOC728534 | 0.788  | 0      |
| LOC728535 | 0.788  | 0      |
| LOC728536 | 1.224  | 0.76   |
| LOC728537 | 1.069  | 0.63   |
| LOC728538 | 0.476  | 1.95   |
| LOC728539 | 1.183  | 0      |
| LOC728540 | 3.461  | 0      |
| LOC728541 | 0.861  | 3.23   |
| LOC728542 | 1.065  | 0      |
| LOC728543 | 1.479  | 0.23   |
| LOC728544 | 0.947  | 0      |
| LOC728545 | 0.388  | 0.22   |
| LOC728546 | 0.693  | 2.18   |
| LOC728547 | 0.954  | 0.08   |
| LOC728548 | 0.624  | 0.27   |
| LOC728549 | 0.783  | 0.43   |
| LOC728550 | 2.136  | 0      |
| LOC728551 | 0.294  | 11.46  |
| LOC728552 | 0.579  | 0      |
| LOC728553 | 0.729  | 866.39 |
| LOC728554 | 10.849 | 2.95   |
| LOC728555 | 0.981  | 0      |
| LOC728557 | 0.702  | 0      |
| LOC728558 | 0.647  | 0.52   |
| LOC728559 | 1.2    | 0      |
| LOC728560 | 2.998  | 9.83   |
| LOC728561 | 0.813  | 1.14   |
| LOC728562 | 4.47   | 0.13   |
| LOC728563 | 0.12   | 0      |
| LOC728564 | 4.601  | 0.59   |
| LOC728565 | 94.501 | 0      |
| LOC728566 | 0.534  | 0      |
| LOC728567 | 0.488  | 2.42   |
| LOC728569 | 0.738  | 0      |
| LOC728570 | 1.26   | 0.2    |
| LOC728571 | 1.71   | 0      |
| LOC728572 | 0.409  | 0.82   |

|           |        |       |
|-----------|--------|-------|
| LOC728573 | 2.209  | 0     |
| LOC728574 | 1.167  | 0     |
| LOC728575 | 3.46   | 0     |
| LOC728576 | 0.966  | 4.63  |
| LOC728577 | 5.222  | 0     |
| LOC728578 | 1.794  | 0     |
| LOC728579 | 0.729  | 0     |
| LOC728580 | 0.591  | 0     |
| LOC728581 | 0.402  | 0     |
| LOC728582 | 0.951  | 0     |
| LOC728583 | 0.468  | 0     |
| LOC728584 | 0.573  | 0     |
| LOC728585 | 0.645  | 0.78  |
| LOC728587 | 0.408  | 0     |
| LOC728588 | 0.87   | 0     |
| LOC728589 | 2.565  | 2.79  |
| LOC728590 | 0.565  | 26.54 |
| LOC728591 | 0.98   | 0.17  |
| LOC728592 | 1.898  | 0.22  |
| LOC728593 | 0.327  | 0     |
| LOC728594 | 0.66   | 0     |
| LOC728595 | 0.454  | 0.19  |
| LOC728596 | 0.441  | 0     |
| LOC728597 | 1.596  | 0     |
| LOC728598 | 1.122  | 0     |
| LOC728599 | 2.04   | 3.3   |
| LOC728600 | 0.927  | 0     |
| LOC728601 | 1.603  | 0     |
| LOC728602 | 15.548 | 0.7   |
| LOC728603 | 1.425  | 0.12  |
| LOC728604 | 1.134  | 0     |
| LOC728605 | 0.765  | 0     |
| LOC728607 | 0.555  | 0.15  |
| LOC728610 | 0.849  | 0.2   |
| LOC728611 | 8.545  | 0.01  |
| LOC728612 | 2.314  | 0.11  |
| LOC728613 | 2.362  | 2.04  |
| LOC728614 | 1.823  | 0     |
| LOC728615 | 4.498  | 0     |
| LOC728616 | 0.474  | 0     |
| LOC728617 | 0.762  | 3.2   |
| LOC728618 | 0.546  | 0     |
| LOC728619 | 1.446  | 0.18  |
| LOC728620 | 0.744  | 0.68  |
| LOC728622 | 0.871  | 17.8  |
| LOC728623 | 5.248  | 1.34  |
| LOC728624 | 0.635  | 0     |
| LOC728625 | 0.45   | 0     |
| LOC728626 | 0.826  | 0     |
| LOC728627 | 1.288  | 0     |

|           |        |        |
|-----------|--------|--------|
| LOC728628 | 0.645  | 0      |
| LOC728629 | 1.484  | 0      |
| LOC728630 | 2.673  | 0.06   |
| LOC728631 | 0.366  | 0      |
| LOC728632 | 1.245  | 0.07   |
| LOC728633 | 0.279  | 0      |
| LOC728634 | 0.807  | 0      |
| LOC728635 | 1.249  | 0.41   |
| LOC728636 | 13.088 | 0      |
| LOC728637 | 1.04   | 0      |
| LOC728639 | 0.906  | 0      |
| LOC728640 | 2.52   | 0.17   |
| LOC728641 | 1.038  | 0.97   |
| LOC728642 | 2.415  | 18.69  |
| LOC728643 | 1.064  | 0.64   |
| LOC728644 | 55.391 | 0      |
| LOC728645 | 0.627  | 0.94   |
| LOC728646 | 1.683  | 0.3    |
| LOC728647 | 1.459  | 0      |
| LOC728648 | 1.215  | 0      |
| LOC728649 | 1.85   | 0.04   |
| LOC728650 | 0.447  | 0      |
| LOC728651 | 1.206  | 2.3    |
| LOC728652 | 0.33   | 0      |
| LOC728653 | 2.556  | 0.03   |
| LOC728654 | 0.584  | 0      |
| LOC728655 | 0.484  | 0      |
| LOC728656 | 1.524  | 0      |
| LOC728657 | 4.21   | 0      |
| LOC728658 | 0.715  | 517.55 |
| LOC728659 | 1.467  | 0      |
| LOC728660 | 0.59   | 0      |
| LOC728661 | 6.292  | 28.97  |
| LOC728662 | 0.224  | 0      |
| LOC728663 | 0.396  | 0      |
| LOC728664 | 1.522  | 1.38   |
| LOC728665 | 1.006  | 0      |
| LOC728666 | 0.893  | 1.04   |
| LOC728667 | 0.486  | 0      |
| LOC728668 | 1.143  | 0      |
| LOC728669 | 0.519  | 110.04 |
| LOC728670 | 1.308  | 0      |
| LOC728671 | 0.855  | 0      |
| LOC728672 | 1.757  | 8.43   |
| LOC728673 | 1.48   | 0.06   |
| LOC728674 | 0.774  | 0      |
| LOC728675 | 0.18   | 0      |
| LOC728676 | 0.714  | 0      |
| LOC728677 | 2.186  | 0.23   |
| LOC728678 | 3.291  | 0.03   |

|           |        |       |
|-----------|--------|-------|
| LOC728679 | 0.933  | 0     |
| LOC728680 | 0.768  | 0.76  |
| LOC728681 | 0.705  | 1.67  |
| LOC728682 | 0.207  | 0     |
| LOC728683 | 1.366  | 0     |
| LOC728684 | 0.642  | 0     |
| LOC728685 | 2.292  | 0     |
| LOC728686 | 0.417  | 0.4   |
| LOC728687 | 2.055  | 0     |
| LOC728688 | 1.839  | 22.3  |
| LOC728689 | 4.034  | 53.33 |
| LOC728690 | 1.812  | 0     |
| LOC728691 | 0.63   | 0     |
| LOC728692 | 1.584  | 0.74  |
| LOC728693 | 0.572  | 0.74  |
| LOC728694 | 0.58   | 0     |
| LOC728696 | 0.723  | 0     |
| LOC728697 | 0.594  | 0     |
| LOC728698 | 6.566  | 2.36  |
| LOC728699 | 0.483  | 0.53  |
| LOC728700 | 1.031  | 0     |
| LOC728701 | 1.865  | 0     |
| LOC728702 | 0.627  | 0     |
| LOC728703 | 0.3    | 3.08  |
| LOC728704 | 2.73   | 0.65  |
| LOC728705 | 2.176  | 0.7   |
| LOC728706 | 1.011  | 2.25  |
| LOC728707 | 1.361  | 0     |
| LOC728708 | 71.841 | 0     |
| LOC728709 | 0.818  | 0     |
| LOC728710 | 0.297  | 0     |
| LOC728711 | 0.9    | 0     |
| LOC728713 | 0.231  | 56.89 |
| LOC728714 | 0.48   | 0.18  |
| LOC728715 | 0.659  | 5.49  |
| LOC728717 | 0.777  | 0     |
| LOC728718 | 0.339  | 0     |
| LOC728719 | 2.571  | 0.85  |
| LOC728720 | 1.62   | 0     |
| LOC728721 | 0.624  | 0.14  |
| LOC728722 | 0.432  | 0     |
| LOC728723 | 0.609  | 0.28  |
| LOC728725 | 4.246  | 0     |
| LOC728726 | 0.555  | 0.15  |
| LOC728727 | 0.797  | 0.21  |
| LOC728728 | 4.059  | 0.02  |
| LOC728729 | 0.429  | 0.39  |
| LOC728730 | 0.73   | 1.16  |
| LOC728731 | 5.52   | 0     |
| LOC728732 | 1.259  | 1.27  |



|           |         |       |
|-----------|---------|-------|
| LOC728734 | 3.94    | 0     |
| LOC728735 | 110.054 | 0.05  |
| LOC728736 | 0.429   | 0     |
| LOC728737 | 1.027   | 7.79  |
| LOC728738 | 0.498   | 0     |
| LOC728739 | 1.77    | 0.66  |
| LOC728741 | 4.253   | 0     |
| LOC728742 | 2.3     | 0.07  |
| LOC728744 | 1.654   | 0.15  |
| LOC728745 | 0.957   | 0     |
| LOC728746 | 1.954   | 0     |
| LOC728747 | 3.968   | 0     |
| LOC728748 | 1.755   | 0     |
| LOC728749 | 0.748   | 0     |
| LOC728750 | 0.324   | 0     |
| LOC728751 | 0.894   | 0     |
| LOC728752 | 0.636   | 0.93  |
| LOC728753 | 1.954   | 0     |
| LOC728754 | 0.412   | 0     |
| LOC728755 | 0.569   | 0     |
| LOC728756 | 0.825   | 0     |
| LOC728757 | 0.384   | 0     |
| LOC728759 | 60.392  | 0.03  |
| LOC728760 | 1.777   | 0     |
| LOC728761 | 1.809   | 0.04  |
| LOC728762 | 0.444   | 0     |
| LOC728763 | 4.59    | 0     |
| LOC728764 | 4.166   | 0.35  |
| LOC728765 | 1.72    | 0     |
| LOC728766 | 1.481   | 2.79  |
| LOC728767 | 0.444   | 0     |
| LOC728768 | 0.64    | 0     |
| LOC728769 | 1.776   | 4.93  |
| LOC728770 | 5.198   | 0     |
| LOC728771 | 0.606   | 0     |
| LOC728772 | 4.025   | 0     |
| LOC728773 | 2.033   | 1.5   |
| LOC728774 | 0.39    | 0.43  |
| LOC728775 | 0.74    | 0.23  |
| LOC728777 | 0.459   | 0     |
| LOC728778 | 2.297   | 3.08  |
| LOC728779 | 0.456   | 0     |
| LOC728780 | 2.292   | 0.03  |
| LOC728781 | 0.593   | 0.14  |
| LOC728782 | 0.571   | 0     |
| LOC728783 | 9.457   | 0     |
| LOC728784 | 0.447   | 0     |
| LOC728785 | 0.471   | 3.04  |
| LOC728787 | 3.079   | 11.11 |
| LOC728788 | 0.993   | 0     |

|           |        |      |
|-----------|--------|------|
| LOC728789 | 2.359  | 0    |
| LOC728790 | 2.336  | 0    |
| LOC728791 | 0.531  | 2.7  |
| LOC728792 | 0.645  | 0.13 |
| LOC728793 | 0.438  | 0    |
| LOC728794 | 0.324  | 1.56 |
| LOC728796 | 0.978  | 0    |
| LOC728797 | 1.956  | 0    |
| LOC728798 | 1.425  | 0.12 |
| LOC728799 | 2.671  | 0    |
| LOC728800 | 1.148  | 0    |
| LOC728801 | 0.99   | 0    |
| LOC728802 | 4.301  | 0.08 |
| LOC728804 | 4.812  | 0.09 |
| LOC728805 | 1.625  | 0    |
| LOC728806 | 2      | 0.76 |
| LOC728807 | 16.322 | 0.14 |
| LOC728808 | 0.576  | 0    |
| LOC728809 | 2.211  | 0    |
| LOC728810 | 0.324  | 0    |
| LOC728811 | 15.175 | 0.01 |
| LOC728812 | 0.49   | 0    |
| LOC728813 | 4.201  | 0    |
| LOC728814 | 0.63   | 0    |
| LOC728815 | 0.588  | 0.58 |
| LOC728816 | 0.697  | 0    |
| LOC728817 | 1.957  | 0.99 |
| LOC728818 | 0.757  | 0.33 |
| LOC728820 | 0.497  | 1.02 |
| LOC728821 | 0.429  | 0    |
| LOC728822 | 0.828  | 0    |
| LOC728823 | 0.466  | 0    |
| LOC728824 | 1.716  | 0    |
| LOC728825 | 1.069  | 0.39 |
| LOC728826 | 0.327  | 0    |
| LOC728827 | 0.762  | 0    |
| LOC728828 | 0.684  | 0    |
| LOC728829 | 0.498  | 0    |
| LOC728830 | 0.803  | 0    |
| LOC728831 | 0.513  | 0.5  |
| LOC728832 | 3.734  | 0.04 |
| LOC728833 | 1.261  | 0.07 |
| LOC728834 | 0.554  | 0    |
| LOC728835 | 2.035  | 0    |
| LOC728836 | 1.468  | 0    |
| LOC728837 | 0.864  | 0    |
| LOC728838 | 0.758  | 0    |
| LOC728839 | 0.444  | 0    |
| LOC728840 | 0.324  | 0    |
| LOC728841 | 89.339 | 0    |

|           |        |       |
|-----------|--------|-------|
| LOC728842 | 0.484  | 0     |
| LOC728843 | 0.811  | 0.2   |
| LOC728844 | 0.817  | 27.22 |
| LOC728845 | 0.369  | 0.91  |
| LOC728846 | 0.81   | 0.1   |
| LOC728847 | 0.573  | 0     |
| LOC728848 | 0.948  | 2.04  |
| LOC728849 | 10.12  | 0     |
| LOC728850 | 1.925  | 0     |
| LOC728851 | 1.208  | 0.9   |
| LOC728852 | 1.038  | 0.16  |
| LOC728853 | 10.792 | 0.01  |
| LOC728854 | 1.613  | 0.05  |
| LOC728855 | 0.536  | 2.36  |
| LOC728856 | 1.422  | 0     |
| LOC728857 | 0.494  | 0     |
| LOC728860 | 3.807  | 0     |
| LOC728861 | 0.561  | 0     |
| LOC728862 | 3.426  | 5.31  |
| LOC728863 | 1.323  | 0.51  |
| LOC728864 | 0.642  | 0     |
| LOC728866 | 3.167  | 0     |
| LOC728867 | 0.489  | 0     |
| LOC728868 | 2.626  | 0.2   |
| LOC728869 | 0.332  | 0.25  |
| LOC728870 | 0.621  | 0     |
| LOC728871 | 0.39   | 0.43  |
| LOC728872 | 0.876  | 0     |
| LOC728873 | 0.342  | 4.93  |
| LOC728874 | 1.291  | 10.89 |
| LOC728875 | 0.536  | 2.36  |
| LOC728876 | 0.537  | 0.15  |
| LOC728877 | 0.492  | 0     |
| LOC728878 | 0.93   | 0     |
| LOC728879 | 0.744  | 0     |
| LOC728880 | 0.414  | 0     |
| LOC728882 | 3.489  | 0.17  |
| LOC728883 | 1.05   | 0     |
| LOC728884 | 0.519  | 0     |
| LOC728885 | 0.348  | 0     |
| LOC728886 | 2.1    | 0     |
| LOC728887 | 1.14   | 2.21  |
| LOC728888 | 31.849 | 0.08  |
| LOC728889 | 1.05   | 0     |
| LOC728890 | 1.64   | 0     |
| LOC728891 | 6.3    | 0     |
| LOC728892 | 0.516  | 11.91 |
| LOC728893 | 0.771  | 0     |
| LOC728894 | 1.581  | 0     |
| LOC728895 | 9.275  | 0.13  |

|           |        |      |
|-----------|--------|------|
| LOC728896 | 1.044  | 0.81 |
| LOC728897 | 0.441  | 0    |
| LOC728898 | 0.702  | 0    |
| LOC728899 | 0.228  | 0    |
| LOC728900 | 20.143 | 0    |
| LOC728901 | 2.336  | 0    |
| LOC728902 | 1.044  | 0    |
| LOC728903 | 3.915  | 0    |
| LOC728904 | 0.728  | 0    |
| LOC728905 | 2.359  | 0    |
| LOC728906 | 1.122  | 0    |
| LOC728907 | 0.984  | 0    |
| LOC728908 | 4.012  | 0    |
| LOC728909 | 0.42   | 0.8  |
| LOC728910 | 0.497  | 0.17 |
| LOC728912 | 3.539  | 0.12 |
| LOC728913 | 3.36   | 5.47 |
| LOC728914 | 0.638  | 0.26 |
| LOC728915 | 0.813  | 0.31 |
| LOC728916 | 1.653  | 0    |
| LOC728917 | 1.443  | 0.76 |
| LOC728919 | 1.451  | 0    |
| LOC728920 | 5.372  | 0.02 |
| LOC728921 | 0.835  | 2.22 |
| LOC728922 | 0.465  | 0    |
| LOC728923 | 1.003  | 7.48 |
| LOC728924 | 0.827  | 0.1  |
| LOC728925 | 0.842  | 0    |
| LOC728926 | 2.012  | 0.25 |
| LOC728927 | 1.317  | 0.96 |
| LOC728928 | 0.882  | 0.76 |
| LOC728929 | 1.877  | 0    |
| LOC728930 | 0.667  | 0.75 |
| LOC728931 | 1.442  | 1.64 |
| LOC728932 | 1.523  | 0.06 |
| LOC728933 | 1.029  | 0    |
| LOC728934 | 0.875  | 0    |
| LOC728935 | 1.239  | 0    |
| LOC728936 | 10.335 | 0.11 |
| LOC728937 | 0.49   | 0    |
| LOC728939 | 3.88   | 0.02 |
| LOC728940 | 0.628  | 0    |
| LOC728941 | 0.597  | 0.28 |
| LOC728942 | 1.024  | 0    |
| LOC728943 | 0.797  | 0    |
| LOC728944 | 2.256  | 0    |
| LOC728945 | 1.136  | 0    |
| LOC728946 | 0.903  | 0    |
| LOC728947 | 0.213  | 0    |
| LOC728948 | 0.339  | 0.25 |

|           |        |        |
|-----------|--------|--------|
| LOC728949 | 0.432  | 0      |
| LOC728950 | 0.705  | 0      |
| LOC728951 | 0.972  | 0      |
| LOC728952 | 0.366  | 0      |
| LOC728953 | 0.506  | 295.82 |
| LOC728954 | 1.793  | 2.77   |
| LOC728955 | 0.322  | 0      |
| LOC728956 | 1.203  | 0      |
| LOC728957 | 3.683  | 0      |
| LOC728958 | 0.72   | 0.71   |
| LOC728959 | 0.54   | 0      |
| LOC728960 | 0.579  | 0.14   |
| LOC728961 | 0.796  | 0      |
| LOC728962 | 0.279  | 0.31   |
| LOC728963 | 0.914  | 0      |
| LOC728964 | 2.129  | 0.4    |
| LOC728965 | 2.163  | 0      |
| LOC728966 | 0.44   | 0      |
| LOC728967 | 1.996  | 0      |
| LOC728968 | 1.428  | 0      |
| LOC728969 | 4.055  | 2.2    |
| LOC728970 | 0.688  | 0      |
| LOC728971 | 0.948  | 0.54   |
| LOC728972 | 0.69   | 0.12   |
| LOC728973 | 0.691  | 1.7    |
| LOC728974 | 1.753  | 1.3    |
| LOC728975 | 1.857  | 1.73   |
| LOC728976 | 1.821  | 0      |
| LOC728977 | 0.603  | 0.14   |
| LOC728979 | 0.686  | 37.21  |
| LOC728980 | 3.211  | 1.6    |
| LOC728981 | 0.639  | 0      |
| LOC728982 | 0.504  | 0      |
| LOC728983 | 1.122  | 0      |
| LOC728984 | 0.696  | 0.85   |
| LOC728985 | 0.6    | 0      |
| LOC728986 | 0.264  | 0.64   |
| LOC728987 | 0.564  | 0      |
| LOC728988 | 0.581  | 1.16   |
| LOC728989 | 1.876  | 1.04   |
| LOC728990 | 35.733 | 0.01   |
| LOC728991 | 2.143  | 0.04   |
| LOC728992 | 0.894  | 0.76   |
| LOC728993 | 0.837  | 0      |
| LOC728994 | 1.136  | 2.67   |
| LOC728995 | 2.907  | 94.03  |
| LOC728996 | 2.48   | 0.31   |
| LOC728997 | 0.6    | 0      |
| LOC728998 | 0.285  | 0      |
| LOC729000 | 0.825  | 0      |

|           |        |      |
|-----------|--------|------|
| LOC729001 | 0.261  | 0    |
| LOC729002 | 0.564  | 0.15 |
| LOC729003 | 3.906  | 3.08 |
| LOC729004 | 0.734  | 0.92 |
| LOC729005 | 0.378  | 0.66 |
| LOC729006 | 0.547  | 0    |
| LOC729007 | 0.456  | 0    |
| LOC729008 | 2.153  | 0.16 |
| LOC729009 | 22.822 | 0.03 |
| LOC729010 | 0.994  | 0.34 |
| LOC729011 | 0.731  | 0    |
| LOC729012 | 0.799  | 3.27 |
| LOC729013 | 1.165  | 4.99 |
| LOC729014 | 1.497  | 0    |
| LOC729015 | 1.167  | 0    |
| LOC729016 | 0.759  | 1.89 |
| LOC729017 | 0.936  | 0.45 |
| LOC729018 | 0.84   | 0.5  |
| LOC729021 | 6.544  | 0.79 |
| LOC729022 | 0.813  | 0.31 |
| LOC729023 | 12.784 | 0    |
| LOC729024 | 0.621  | 0.14 |
| LOC729025 | 1.74   | 0    |
| LOC729026 | 0.534  | 0    |
| LOC729027 | 1.191  | 1.27 |
| LOC729028 | 0.906  | 0    |
| LOC729029 | 1.61   | 1.36 |
| LOC729030 | 0.888  | 6.74 |
| LOC729031 | 0.255  | 0    |
| LOC729032 | 0.354  | 0    |
| LOC729033 | 2.236  | 0.03 |
| LOC729034 | 3.057  | 0    |
| LOC729035 | 0.378  | 0.67 |
| LOC729036 | 1.287  | 0    |
| LOC729037 | 0.654  | 0    |
| LOC729038 | 0.42   | 0    |
| LOC729039 | 1.227  | 0    |
| LOC729040 | 1.046  | 0    |
| LOC729041 | 1.035  | 0.08 |
| LOC729042 | 0.603  | 0.42 |
| LOC729043 | 1.215  | 0.14 |
| LOC729044 | 1.098  | 0.23 |
| LOC729045 | 0.859  | 0.2  |
| LOC729046 | 1.428  | 0.65 |
| LOC729047 | 2.751  | 0    |
| LOC729048 | 0.543  | 0.47 |
| LOC729049 | 2.882  | 0.12 |
| LOC729050 | 1.434  | 0    |
| LOC729051 | 0.551  | 0    |
| LOC729053 | 0.387  | 0    |

|           |        |       |
|-----------|--------|-------|
| LOC729054 | 0.949  | 0.26  |
| LOC729055 | 12.451 | 0     |
| LOC729056 | 0.312  | 0     |
| LOC729057 | 1.565  | 0.21  |
| LOC729059 | 0.952  | 0     |
| LOC729060 | 1.049  | 0.16  |
| LOC729061 | 0.516  | 0     |
| LOC729062 | 0.432  | 0.19  |
| LOC729063 | 0.72   | 68.56 |
| LOC729064 | 0.477  | 0.71  |
| LOC729065 | 0.725  | 0     |
| LOC729066 | 0.135  | 0     |
| LOC729067 | 0.246  | 0     |
| LOC729068 | 0.348  | 0.24  |
| LOC729069 | 0.526  | 0     |
| LOC729070 | 0.788  | 0     |
| LOC729071 | 0.393  | 0     |
| LOC729072 | 0.615  | 0     |
| LOC729073 | 1.328  | 0     |
| LOC729074 | 25.563 | 0     |
| LOC729075 | 0.195  | 3.03  |
| LOC729076 | 0.432  | 0     |
| LOC729077 | 0.324  | 0     |
| LOC729078 | 0.59   | 0     |
| LOC729079 | 0.885  | 1.14  |
| LOC729080 | 1.08   | 0     |
| LOC729081 | 1.89   | 0     |
| LOC729082 | 0.943  | 6.79  |
| LOC729083 | 0.897  | 0     |
| LOC729084 | 0.528  | 0     |
| LOC729085 | 2.628  | 0     |
| LOC729086 | 2.95   | 5.22  |
| LOC729087 | 0.759  | 0     |
| LOC729088 | 1.375  | 1.59  |
| LOC729089 | 1.455  | 0     |
| LOC729090 | 7.158  | 0.16  |
| LOC729093 | 2.081  | 0.25  |
| LOC729094 | 0.706  | 0     |
| LOC729095 | 0.756  | 0     |
| LOC729096 | 12.696 | 0.06  |
| LOC729097 | 0.781  | 25.88 |
| LOC729098 | 0.585  | 0     |
| LOC729099 | 0.615  | 0.14  |
| LOC729100 | 0.183  | 0     |
| LOC729101 | 0.601  | 0.28  |
| LOC729102 | 0.946  | 0.54  |
| LOC729103 | 0.714  | 0.36  |
| LOC729104 | 0.594  | 1.84  |
| LOC729105 | 45.852 | 0.01  |
| LOC729106 | 0.693  | 0     |

|           |        |       |
|-----------|--------|-------|
| LOC729107 | 0.537  | 0     |
| LOC729108 | 1.323  | 0     |
| LOC729109 | 0.916  | 2.48  |
| LOC729110 | 0.333  | 0     |
| LOC729111 | 0.375  | 0     |
| LOC729112 | 0.543  | 0     |
| LOC729113 | 0.579  | 0     |
| LOC729114 | 0.978  | 0     |
| LOC729115 | 0.33   | 0     |
| LOC729116 | 0.225  | 0     |
| LOC729117 | 0.585  | 0     |
| LOC729118 | 8.376  | 0.17  |
| LOC729119 | 0.615  | 11.37 |
| LOC729120 | 1.117  | 0     |
| LOC729121 | 0.881  | 0     |
| LOC729122 | 0.628  | 0     |
| LOC729123 | 1.463  | 0.12  |
| LOC729124 | 0.903  | 5.23  |
| LOC729125 | 0.378  | 0     |
| LOC729126 | 0.489  | 0.17  |
| LOC729127 | 2.068  | 0     |
| LOC729128 | 0.378  | 0     |
| LOC729129 | 0.666  | 0     |
| LOC729130 | 0.553  | 0.15  |
| LOC729131 | 7.056  | 0     |
| LOC729132 | 0.522  | 0     |
| LOC729133 | 0.705  | 0     |
| LOC729134 | 0.579  | 0     |
| LOC729135 | 3.901  | 1.52  |
| LOC729136 | 1.167  | 0     |
| LOC729137 | 2.198  | 0.04  |
| LOC729138 | 0.397  | 90.81 |
| LOC729139 | 0.129  | 5.22  |
| LOC729140 | 0.312  | 0     |
| LOC729141 | 10.499 | 0.03  |
| LOC729142 | 2.012  | 0.13  |
| LOC729143 | 3.802  | 11.03 |
| LOC729144 | 0.744  | 0.34  |
| LOC729145 | 0.471  | 0     |
| LOC729146 | 0.579  | 6.11  |
| LOC729147 | 1.008  | 0     |
| LOC729148 | 3.877  | 2.28  |
| LOC729149 | 1.137  | 0     |
| LOC729150 | 1.664  | 0.1   |
| LOC729151 | 0.861  | 0.3   |
| LOC729152 | 0.891  | 0     |
| LOC729153 | 5.812  | 0     |
| LOC729154 | 1.502  | 3.14  |
| LOC729155 | 0.195  | 0     |
| LOC729156 | 1.452  | 0.23  |



|           |        |      |
|-----------|--------|------|
| LOC729157 | 1.5    | 0.62 |
| LOC729158 | 0.552  | 0.15 |
| LOC729159 | 1.248  | 0    |
| LOC729160 | 0.447  | 0    |
| LOC729161 | 0.559  | 0    |
| LOC729162 | 1.152  | 0    |
| LOC729163 | 0.668  | 0.13 |
| LOC729165 | 0.453  | 0    |
| LOC729166 | 0.864  | 0    |
| LOC729167 | 0.645  | 0    |
| LOC729168 | 13.537 | 0.07 |
| LOC729169 | 1.824  | 0    |
| LOC729170 | 0.953  | 0.08 |
| LOC729172 | 2.428  | 2.15 |
| LOC729173 | 2.188  | 0    |
| LOC729174 | 0.501  | 0    |
| LOC729175 | 0.908  | 0    |
| LOC729176 | 2.201  | 0.69 |
| LOC729177 | 1.993  | 0    |
| LOC729178 | 0.333  | 0    |
| LOC729179 | 1.458  | 0.46 |
| LOC729180 | 0.633  | 0    |
| LOC729181 | 0.273  | 2.78 |
| LOC729182 | 2.298  | 0.11 |
| LOC729183 | 0.489  | 0    |
| LOC729184 | 0.936  | 0    |
| LOC729185 | 1.207  | 0    |
| LOC729186 | 0.642  | 0    |
| LOC729187 | 1.615  | 0    |
| LOC729188 | 0.457  | 0.19 |
| LOC729189 | 1.577  | 0    |
| LOC729190 | 0.765  | 0.11 |
| LOC729191 | 3.079  | 0.74 |
| LOC729192 | 0.786  | 0    |
| LOC729193 | 4.008  | 0.13 |
| LOC729194 | 0.567  | 6.39 |
| LOC729195 | 2.661  | 0    |
| LOC729196 | 1.292  | 0.07 |
| LOC729197 | 11.355 | 0    |
| LOC729198 | 0.775  | 1.63 |
| LOC729199 | 2.216  | 0.03 |
| LOC729200 | 0.715  | 5.66 |
| LOC729202 | 0.414  | 0.41 |
| LOC729203 | 1.354  | 0.06 |
| LOC729204 | 1.015  | 0    |
| LOC729205 | 0.678  | 0    |
| LOC729206 | 0.687  | 0    |
| LOC729207 | 0.81   | 0    |
| LOC729208 | 0.519  | 0.32 |
| LOC729209 | 1.338  | 3.97 |

|           |         |        |
|-----------|---------|--------|
| LOC729210 | 0.549   | 0      |
| LOC729211 | 22.577  | 0.04   |
| LOC729212 | 2.575   | 1.87   |
| LOC729213 | 63.289  | 0.01   |
| LOC729214 | 1.048   | 0      |
| LOC729215 | 0.869   | 1.16   |
| LOC729216 | 17.802  | 0.02   |
| LOC729217 | 142.009 | 0.02   |
| LOC729218 | 1.04    | 0.25   |
| LOC729219 | 0.687   | 0      |
| LOC729221 | 0.579   | 0      |
| LOC729222 | 57.739  | 0.01   |
| LOC729223 | 0.864   | 0.98   |
| LOC729225 | 1.76    | 0.57   |
| LOC729226 | 12.669  | 0      |
| LOC729227 | 0.744   | 0      |
| LOC729228 | 0.687   | 0      |
| LOC729229 | 0.509   | 0      |
| LOC729230 | 4.871   | 0.21   |
| LOC729231 | 1.5     | 0.17   |
| LOC729232 | 0.771   | 1.64   |
| LOC729233 | 1.847   | 0      |
| LOC729234 | 12.593  | 0.24   |
| LOC729235 | 0.687   | 0      |
| LOC729236 | 0.559   | 361.66 |
| LOC729238 | 3.672   | 0      |
| LOC729239 | 0.417   | 0      |
| LOC729240 | 1.847   | 0      |
| LOC729241 | 0.546   | 0      |
| LOC729242 | 0.557   | 0      |
| LOC729243 | 0.366   | 1.39   |
| LOC729244 | 0.727   | 0.47   |
| LOC729245 | 0.975   | 0.35   |
| LOC729246 | 1.847   | 0      |
| LOC729247 | 1.092   | 0      |
| LOC729248 | 1.622   | 0.42   |
| LOC729249 | 0.69    | 0.24   |
| LOC729250 | 1.847   | 0      |
| LOC729251 | 0.281   | 0      |
| LOC729252 | 4.704   | 0      |
| LOC729253 | 0.45    | 0      |
| LOC729255 | 0.411   | 9.43   |
| LOC729256 | 1.14    | 0      |
| LOC729257 | 1.296   | 0      |
| LOC729258 | 1.682   | 0.3    |
| LOC729259 | 3.218   | 0.05   |
| LOC729260 | 1.461   | 0      |
| LOC729261 | 0.273   | 0      |
| LOC729262 | 4.868   | 0      |
| LOC729264 | 4.938   | 0      |

|           |        |        |
|-----------|--------|--------|
| LOC729265 | 0.481  | 0      |
| LOC729266 | 12.205 | 0      |
| LOC729267 | 1.919  | 20.72  |
| LOC729269 | 3.075  | 1.48   |
| LOC729270 | 0.273  | 0      |
| LOC729271 | 0.474  | 0      |
| LOC729272 | 2.957  | 0      |
| LOC729273 | 0.273  | 0      |
| LOC729274 | 0.889  | 1.32   |
| LOC729275 | 1.794  | 0.51   |
| LOC729276 | 1.02   | 0      |
| LOC729277 | 6.78   | 0      |
| LOC729278 | 0.273  | 0      |
| LOC729279 | 0.458  | 537.42 |
| LOC729280 | 1.075  | 0      |
| LOC729281 | 0.723  | 1.05   |
| LOC729282 | 8.574  | 0      |
| LOC729283 | 0.243  | 0      |
| LOC729284 | 0.273  | 0      |
| LOC729285 | 0.958  | 0      |
| LOC729286 | 0.591  | 1.28   |
| LOC729287 | 0.348  | 0      |
| LOC729288 | 0.689  | 0.12   |
| LOC729289 | 1.99   | 0.04   |
| LOC729290 | 1.849  | 4.1    |
| LOC729291 | 3.232  | 0.99   |
| LOC729292 | 0.668  | 0      |
| LOC729293 | 0.213  | 1.98   |
| LOC729294 | 2.469  | 0      |
| LOC729295 | 1.011  | 0      |
| LOC729296 | 1.024  | 0      |
| LOC729297 | 2.718  | 0      |
| LOC729298 | 0.954  | 1.94   |
| LOC729299 | 0.768  | 0      |
| LOC729300 | 0.483  | 0      |
| LOC729301 | 0.641  | 1.45   |
| LOC729302 | 0.42   | 0      |
| LOC729303 | 1.176  | 0.14   |
| LOC729304 | 0.756  | 0      |
| LOC729305 | 1.507  | 0      |
| LOC729306 | 0.495  | 0      |
| LOC729307 | 0.541  | 0      |
| LOC729309 | 0.899  | 0      |
| LOC729310 | 0.44   | 0      |
| LOC729311 | 0.786  | 0.11   |
| LOC729312 | 0.94   | 0      |
| LOC729313 | 0.665  | 0.51   |
| LOC729314 | 11.942 | 0.01   |
| LOC729315 | 0.666  | 0      |
| LOC729316 | 4.566  | 4.37   |

|           |        |        |
|-----------|--------|--------|
| LOC729317 | 1.706  | 45.03  |
| LOC729318 | 0.717  | 0      |
| LOC729319 | 1.062  | 0      |
| LOC729320 | 0.864  | 0.59   |
| LOC729321 | 0.44   | 0      |
| LOC729322 | 1.125  | 0.08   |
| LOC729323 | 0.44   | 0      |
| LOC729325 | 0.609  | 0.83   |
| LOC729326 | 1.143  | 0      |
| LOC729327 | 0.995  | 2.37   |
| LOC729328 | 0.228  | 0      |
| LOC729329 | 22.405 | 0      |
| LOC729331 | 0.732  | 0.81   |
| LOC729332 | 0.414  | 0      |
| LOC729333 | 1.176  | 0      |
| LOC729334 | 41.675 | 0.01   |
| LOC729335 | 0.572  | 0      |
| LOC729336 | 1.364  | 0.19   |
| LOC729337 | 1.081  | 0      |
| LOC729338 | 3.727  | 0      |
| LOC729339 | 0.273  | 0      |
| LOC729340 | 0.659  | 0.89   |
| LOC729341 | 0.567  | 0      |
| LOC729342 | 2.964  | 0.23   |
| LOC729343 | 10.682 | 0      |
| LOC729344 | 9.351  | 0      |
| LOC729345 | 0.366  | 0.69   |
| LOC729346 | 0.273  | 0      |
| LOC729347 | 0.96   | 5      |
| LOC729348 | 12.008 | 0      |
| LOC729349 | 0.598  | 1.4    |
| LOC729350 | 5.605  | 0      |
| LOC729351 | 0.546  | 0      |
| LOC729352 | 1.063  | 0      |
| LOC729353 | 15.188 | 0      |
| LOC729355 | 4.95   | 0      |
| LOC729356 | 7.842  | 0      |
| LOC729357 | 0.318  | 0      |
| LOC729358 | 0.58   | 0      |
| LOC729360 | 0.417  | 0      |
| LOC729361 | 0.765  | 0.33   |
| LOC729362 | 0.424  | 515.75 |
| LOC729363 | 0.52   | 0      |
| LOC729364 | 0.567  | 0      |
| LOC729365 | 0.348  | 0.72   |
| LOC729366 | 1.312  | 0.77   |
| LOC729367 | 0.984  | 0.17   |
| LOC729368 | 1.884  | 0      |
| LOC729369 | 1.538  | 0      |
| LOC729370 | 2.185  | 0      |

|           |         |       |
|-----------|---------|-------|
| LOC729371 | 0.273   | 0     |
| LOC729372 | 0.273   | 0     |
| LOC729373 | 0.768   | 0.44  |
| LOC729374 | 1.107   | 0.76  |
| LOC729375 | 13.792  | 0.12  |
| LOC729376 | 0.465   | 0     |
| LOC729377 | 1.446   | 0.23  |
| LOC729378 | 0.661   | 0     |
| LOC729379 | 0.273   | 0     |
| LOC729380 | 0.153   | 0     |
| LOC729381 | 0.639   | 0     |
| LOC729382 | 0.828   | 0     |
| LOC729383 | 0.273   | 0     |
| LOC729384 | 1.651   | 0     |
| LOC729385 | 0.684   | 0     |
| LOC729386 | 1.062   | 2.69  |
| LOC729387 | 0.273   | 0     |
| LOC729388 | 0.501   | 0.34  |
| LOC729389 | 0.787   | 46.67 |
| LOC729390 | 3.316   | 0     |
| LOC729391 | 0.507   | 0.5   |
| LOC729392 | 4.441   | 0     |
| LOC729393 | 0.96    | 0.26  |
| LOC729394 | 0.273   | 0     |
| LOC729395 | 0.894   | 0     |
| LOC729396 | 0.627   | 0     |
| LOC729397 | 0.732   | 5.64  |
| LOC729398 | 0.876   | 0     |
| LOC729399 | 188.616 | 0     |
| LOC729400 | 3.85    | 0     |
| LOC729401 | 0.357   | 0     |
| LOC729402 | 0.602   | 0     |
| LOC729403 | 1.005   | 0.76  |
| LOC729404 | 1.854   | 0.18  |
| LOC729405 | 0.531   | 0.31  |
| LOC729406 | 0.752   | 0.22  |
| LOC729407 | 0.851   | 0     |
| LOC729408 | 0.624   | 0     |
| LOC729409 | 1.581   | 0.37  |
| LOC729410 | 0.837   | 0     |
| LOC729411 | 0.72    | 0.12  |
| LOC729412 | 0.177   | 0     |
| LOC729413 | 0.534   | 0     |
| LOC729414 | 0.582   | 0.43  |
| LOC729415 | 0.699   | 0     |
| LOC729417 | 1.206   | 0.76  |
| LOC729418 | 0.159   | 6.36  |
| LOC729419 | 0.261   | 0     |
| LOC729421 | 0.823   | 0.71  |
| LOC729422 | 0.627   | 0     |

|           |        |       |
|-----------|--------|-------|
| LOC729423 | 7.685  | 0.18  |
| LOC729424 | 0.855  | 0     |
| LOC729425 | 0.699  | 0     |
| LOC729426 | 0.566  | 0     |
| LOC729427 | 0.755  | 0     |
| LOC729429 | 0.645  | 0     |
| LOC729430 | 1.235  | 2.18  |
| LOC729431 | 0.627  | 0     |
| LOC729432 | 0.46   | 0     |
| LOC729433 | 1.578  | 14.2  |
| LOC729434 | 0.414  | 0     |
| LOC729435 | 0.686  | 7.49  |
| LOC729436 | 0.768  | 0.22  |
| LOC729437 | 0.489  | 0.35  |
| LOC729438 | 0.99   | 0.17  |
| LOC729439 | 1.067  | 0     |
| LOC729440 | 1.825  | 8.12  |
| LOC729441 | 0.601  | 2.66  |
| LOC729442 | 0.627  | 0     |
| LOC729443 | 0.615  | 0.27  |
| LOC729444 | 1.055  | 0     |
| LOC729445 | 0.557  | 0     |
| LOC729446 | 7.377  | 0     |
| LOC729447 | 0.624  | 0     |
| LOC729448 | 0.765  | 0     |
| LOC729449 | 70.711 | 0.01  |
| LOC729450 | 3.615  | 0     |
| LOC729451 | 0.681  | 0     |
| LOC729452 | 0.761  | 0     |
| LOC729453 | 0.768  | 0     |
| LOC729454 | 0.6    | 0.14  |
| LOC729455 | 0.549  | 0     |
| LOC729456 | 0.273  | 0     |
| LOC729457 | 0.831  | 0.71  |
| LOC729458 | 0.65   | 0     |
| LOC729459 | 0.273  | 0     |
| LOC729460 | 1.059  | 0.48  |
| LOC729461 | 1.72   | 0     |
| LOC729462 | 0.273  | 0     |
| LOC729463 | 5.015  | 3.68  |
| LOC729464 | 1.029  | 0     |
| LOC729465 | 0.613  | 0     |
| LOC729466 | 0.719  | 27.77 |
| LOC729467 | 1.461  | 0     |
| LOC729468 | 0.543  | 0     |
| LOC729469 | 0.903  | 0     |
| LOC729470 | 0.828  | 0.41  |
| LOC729471 | 1.227  | 0     |
| LOC729472 | 0.384  | 0     |
| LOC729473 | 0.222  | 7.97  |

|           |        |      |
|-----------|--------|------|
| LOC729474 | 1.149  | 0    |
| LOC729476 | 0.939  | 0    |
| LOC729477 | 0.873  | 0    |
| LOC729478 | 0.444  | 0.19 |
| LOC729479 | 0.563  | 0    |
| LOC729480 | 0.536  | 0.78 |
| LOC729481 | 0.579  | 1.31 |
| LOC729482 | 0.417  | 6.87 |
| LOC729483 | 0.339  | 0    |
| LOC729484 | 0.537  | 0.15 |
| LOC729485 | 0.563  | 0    |
| LOC729486 | 10.179 | 0.05 |
| LOC729487 | 1.314  | 0.51 |
| LOC729488 | 2.009  | 0.04 |
| LOC729489 | 0.729  | 0.12 |
| LOC729490 | 0.585  | 0.58 |
| LOC729491 | 1.347  | 0    |
| LOC729492 | 0.593  | 0    |
| LOC729493 | 4.895  | 2.77 |
| LOC729494 | 0.959  | 41.9 |
| LOC729495 | 5.152  | 0.05 |
| LOC729496 | 1.032  | 3.27 |
| LOC729497 | 4.397  | 0.39 |
| LOC729498 | 0.393  | 0    |
| LOC729499 | 0.255  | 0    |
| LOC729500 | 0.563  | 0.15 |
| LOC729501 | 1.377  | 0    |
| LOC729502 | 0.603  | 0    |
| LOC729503 | 1.2    | 0.07 |
| LOC729504 | 1.485  | 0.11 |
| LOC729505 | 1.74   | 0    |
| LOC729506 | 4.134  | 2.49 |
| LOC729507 | 0.888  | 0    |
| LOC729508 | 0.575  | 0.14 |
| LOC729509 | 0.615  | 0.14 |
| LOC729510 | 1.028  | 0.08 |
| LOC729511 | 1.107  | 0    |
| LOC729512 | 0.393  | 0    |
| LOC729513 | 29.24  | 0.13 |
| LOC729514 | 0.834  | 0    |
| LOC729515 | 1.786  | 3.4  |
| LOC729516 | 1.844  | 0    |
| LOC729517 | 1.62   | 0    |
| LOC729518 | 1.883  | 5.19 |
| LOC729519 | 2.223  | 0    |
| LOC729520 | 0.394  | 0    |
| LOC729521 | 0.624  | 0    |
| LOC729522 | 52.757 | 0    |
| LOC729523 | 0.237  | 0    |
| LOC729524 | 6.248  | 0    |

|           |        |       |
|-----------|--------|-------|
| LOC729525 | 0.552  | 0     |
| LOC729526 | 0.417  | 0     |
| LOC729527 | 0.414  | 0     |
| LOC729528 | 2.021  | 0     |
| LOC729529 | 0.541  | 0     |
| LOC729530 | 3.996  | 2.95  |
| LOC729531 | 0.246  | 0.34  |
| LOC729532 | 0.822  | 12.19 |
| LOC729533 | 6.847  | 0.08  |
| LOC729534 | 0.878  | 0.09  |
| LOC729535 | 0.733  | 1.61  |
| LOC729536 | 0.416  | 91.73 |
| LOC729537 | 0.381  | 0     |
| LOC729538 | 1.104  | 0.23  |
| LOC729541 | 1.131  | 1.34  |
| LOC729542 | 0.645  | 0.92  |
| LOC729543 | 0.546  | 0     |
| LOC729544 | 0.123  | 9.59  |
| LOC729545 | 1.2    | 0.21  |
| LOC729546 | 0.357  | 0     |
| LOC729547 | 0.873  | 1.64  |
| LOC729548 | 2.254  | 0.49  |
| LOC729549 | 1.65   | 0.25  |
| LOC729550 | 16.433 | 0     |
| LOC729551 | 0.306  | 0     |
| LOC729552 | 0.672  | 0     |
| LOC729553 | 0.57   | 0.15  |
| LOC729554 | 0.825  | 13.79 |
| LOC729555 | 0.348  | 0     |
| LOC729556 | 0.817  | 0.1   |
| LOC729557 | 0.579  | 9.17  |
| LOC729558 | 0.598  | 0     |
| LOC729559 | 2.146  | 5.3   |
| LOC729560 | 0.498  | 0     |
| LOC729561 | 16.966 | 1.57  |
| LOC729562 | 0.411  | 0     |
| LOC729563 | 1.389  | 0.54  |
| LOC729564 | 1.197  | 0.07  |
| LOC729565 | 0.637  | 15.21 |
| LOC729566 | 0.408  | 6.81  |
| LOC729567 | 0.606  | 0     |
| LOC729568 | 0.72   | 0     |
| LOC729569 | 2.117  | 4.3   |
| LOC729570 | 1.356  | 1.93  |
| LOC729571 | 0.507  | 0.33  |
| LOC729572 | 0.363  | 0     |
| LOC729573 | 0.432  | 0     |
| LOC729574 | 0.51   | 0     |
| LOC729575 | 0.837  | 0     |
| LOC729576 | 0.963  | 0.88  |



|           |       |       |
|-----------|-------|-------|
| LOC729577 | 0.126 | 4.68  |
| LOC729578 | 0.798 | 0     |
| LOC729579 | 0.507 | 2     |
| LOC729580 | 1.282 | 40.67 |
| LOC729581 | 1.791 | 0     |
| LOC729582 | 0.579 | 0     |
| LOC729583 | 0.466 | 0     |
| LOC729584 | 1.536 | 0     |
| LOC729585 | 0.432 | 0     |
| LOC729586 | 0.765 | 0.44  |
| LOC729587 | 0.531 | 0     |
| LOC729588 | 0.234 | 0     |
| LOC729589 | 0.464 | 0     |
| LOC729590 | 0.846 | 0     |
| LOC729591 | 0.637 | 0     |
| LOC729592 | 0.582 | 0.14  |
| LOC729593 | 0.543 | 0     |
| LOC729594 | 0.512 | 0     |
| LOC729595 | 0.606 | 0.14  |
| LOC729596 | 0.576 | 0     |
| LOC729597 | 1.373 | 0     |
| LOC729598 | 0.426 | 0     |
| LOC729599 | 1.179 | 1.43  |
| LOC729600 | 0.636 | 0.26  |
| LOC729601 | 0.611 | 0     |
| LOC729602 | 1.119 | 0     |
| LOC729603 | 3.131 | 0.53  |
| LOC729604 | 8.124 | 0.52  |
| LOC729605 | 4.638 | 0     |
| LOC729606 | 0.561 | 3.76  |
| LOC729607 | 1.041 | 0.16  |
| LOC729608 | 1.293 | 4.5   |
| LOC729609 | 0.567 | 0     |
| LOC729610 | 1.114 | 3.03  |
| LOC729611 | 0.825 | 1.22  |
| LOC729612 | 0.42  | 0     |
| LOC729613 | 0.837 | 0     |
| LOC729614 | 1.559 | 4     |
| LOC729615 | 1.596 | 0     |
| LOC729616 | 1.146 | 1.54  |
| LOC729618 | 1.035 | 0     |
| LOC729619 | 0.597 | 0     |
| LOC729620 | 0.563 | 0.3   |
| LOC729621 | 0.318 | 0.79  |
| LOC729622 | 0.879 | 1.15  |
| LOC729623 | 0.867 | 0     |
| LOC729624 | 0.747 | 0.45  |
| LOC729625 | 0.975 | 0.69  |
| LOC729626 | 0.54  | 0.47  |
| LOC729627 | 0.801 | 0     |

|           |        |       |
|-----------|--------|-------|
| LOC729628 | 0.504  | 0     |
| LOC729629 | 0.84   | 0.5   |
| LOC729630 | 1.05   | 0.72  |
| LOC729631 | 0.984  | 0.08  |
| LOC729632 | 0.813  | 0.31  |
| LOC729633 | 2.655  | 0.13  |
| LOC729634 | 1.348  | 0     |
| LOC729635 | 0.567  | 0     |
| LOC729636 | 0.747  | 0     |
| LOC729637 | 0.593  | 0     |
| LOC729638 | 1.287  | 0     |
| LOC729639 | 2.263  | 0     |
| LOC729640 | 0.792  | 0     |
| LOC729641 | 1.227  | 0     |
| LOC729642 | 0.734  | 0     |
| LOC729643 | 0.798  | 0.31  |
| LOC729644 | 0.62   | 0.41  |
| LOC729645 | 0.45   | 0     |
| LOC729646 | 6.91   | 15.36 |
| LOC729647 | 15.964 | 0.1   |
| LOC729648 | 7.461  | 0.03  |
| LOC729649 | 0.825  | 0     |
| LOC729650 | 0.366  | 0     |
| LOC729651 | 0.526  | 0     |
| LOC729652 | 3.264  | 0.05  |
| LOC729653 | 0.593  | 0     |
| LOC729654 | 1.245  | 0     |
| LOC729655 | 61.556 | 0     |
| LOC729656 | 0.576  | 0.14  |
| LOC729657 | 1.016  | 0.75  |
| LOC729658 | 0.556  | 0     |
| LOC729659 | 0.309  | 0     |
| LOC729660 | 8.351  | 0.15  |
| LOC729661 | 0.432  | 0.19  |
| LOC729663 | 0.871  | 0     |
| LOC729664 | 0.717  | 0.12  |
| LOC729665 | 87.38  | 0     |
| LOC729666 | 37.964 | 0.28  |
| LOC729667 | 0.711  | 0     |
| LOC729668 | 11.994 | 0.01  |
| LOC729669 | 1.52   | 7.26  |
| LOC729670 | 0.657  | 2.82  |
| LOC729671 | 1.038  | 0.16  |
| LOC729672 | 0.802  | 0     |
| LOC729673 | 4.32   | 0.23  |
| LOC729674 | 9.238  | 0.78  |
| LOC729675 | 0.794  | 0.31  |
| LOC729676 | 0.894  | 0.94  |
| LOC729677 | 0.81   | 0.42  |
| LOC729678 | 2.392  | 6.9   |

|           |        |       |
|-----------|--------|-------|
| LOC729679 | 0.943  | 3.31  |
| LOC729680 | 1.622  | 2.02  |
| LOC729681 | 1.815  | 0     |
| LOC729682 | 5.555  | 0     |
| LOC729683 | 2.086  | 5.37  |
| LOC729684 | 0.471  | 5.19  |
| LOC729685 | 1.11   | 0.31  |
| LOC729686 | 1.276  | 0.26  |
| LOC729687 | 0.379  | 0.22  |
| LOC729688 | 0.654  | 2.32  |
| LOC729689 | 4.406  | 0     |
| LOC729690 | 0.777  | 0.54  |
| LOC729691 | 1.023  | 0     |
| LOC729692 | 0.42   | 3.21  |
| LOC729693 | 0.42   | 0     |
| LOC729694 | 0.597  | 0     |
| LOC729695 | 0.597  | 0     |
| LOC729696 | 2.302  | 0.11  |
| LOC729697 | 0.699  | 0.12  |
| LOC729698 | 0.597  | 0     |
| LOC729699 | 0.669  | 0     |
| LOC729700 | 0.597  | 0     |
| LOC729701 | 27.201 | 0.05  |
| LOC729702 | 0.633  | 0     |
| LOC729703 | 0.597  | 0     |
| LOC729704 | 0.563  | 0     |
| LOC729705 | 0.561  | 0.3   |
| LOC729706 | 0.597  | 0     |
| LOC729707 | 1.35   | 0.31  |
| LOC729708 | 1.997  | 26.45 |
| LOC729709 | 0.99   | 0     |
| LOC729710 | 0.935  | 0     |
| LOC729711 | 0.597  | 0     |
| LOC729712 | 0.639  | 0     |
| LOC729713 | 1.509  | 0.11  |
| LOC729714 | 0.636  | 1.59  |
| LOC729715 | 0.643  | 0     |
| LOC729716 | 0.105  | 0     |
| LOC729717 | 0.416  | 0     |
| LOC729718 | 0.669  | 0.13  |
| LOC729719 | 0.597  | 0     |
| LOC729720 | 0.714  | 0     |
| LOC729721 | 0.747  | 0     |
| LOC729722 | 0.72   | 0     |
| LOC729723 | 0.549  | 0.92  |
| LOC729724 | 0.597  | 0     |
| LOC729725 | 0.426  | 0     |
| LOC729728 | 0.891  | 0     |
| LOC729729 | 1.284  | 0     |
| LOC729730 | 0.798  | 0     |

|           |        |      |
|-----------|--------|------|
| LOC729731 | 0.597  | 0    |
| LOC729732 | 0.396  | 0    |
| LOC729733 | 0.699  | 0.24 |
| LOC729734 | 0.729  | 0    |
| LOC729735 | 0.597  | 0    |
| LOC729736 | 0.498  | 0    |
| LOC729737 | 1.039  | 0    |
| LOC729738 | 0.81   | 0    |
| LOC729739 | 14.03  | 0.01 |
| LOC729740 | 0.526  | 0    |
| LOC729741 | 1.311  | 0    |
| LOC729742 | 39.389 | 0.05 |
| LOC729743 | 1.225  | 0    |
| LOC729744 | 0.969  | 0    |
| LOC729745 | 0.873  | 0.48 |
| LOC729746 | 0.857  | 0    |
| LOC729747 | 1.737  | 0.14 |
| LOC729748 | 1.029  | 2.21 |
| LOC729749 | 0.407  | 0    |
| LOC729750 | 0.129  | 4.57 |
| LOC729751 | 1.904  | 2.96 |
| LOC729752 | 0.792  | 0    |
| LOC729753 | 0.516  | 0    |
| LOC729754 | 12.091 | 0    |
| LOC729755 | 0.622  | 0.27 |
| LOC729756 | 0.765  | 0    |
| LOC729757 | 0.978  | 0    |
| LOC729758 | 0.432  | 0.2  |
| LOC729760 | 0.896  | 0.19 |
| LOC729761 | 0.381  | 0    |
| LOC729762 | 1.242  | 0    |
| LOC729763 | 0.31   | 0    |
| LOC729764 | 10.893 | 0.02 |
| LOC729765 | 0.753  | 0    |
| LOC729766 | 0.78   | 0    |
| LOC729767 | 1.197  | 0    |
| LOC729768 | 0.558  | 8.61 |
| LOC729769 | 0.342  | 0    |
| LOC729770 | 1.95   | 0.08 |
| LOC729771 | 0.525  | 0    |
| LOC729772 | 0.669  | 0    |
| LOC729773 | 0.472  | 0.18 |
| LOC729774 | 0.718  | 0.47 |
| LOC729775 | 0.763  | 0.11 |
| LOC729776 | 0.368  | 7.1  |
| LOC729777 | 1.276  | 2.05 |
| LOC729778 | 1.437  | 0    |
| LOC729779 | 1.342  | 0.19 |
| LOC729780 | 0.724  | 0.47 |
| LOC729781 | 0.931  | 0.54 |

|           |         |       |
|-----------|---------|-------|
| LOC729782 | 0.846   | 0     |
| LOC729783 | 8.574   | 0     |
| LOC729784 | 0.741   | 0.46  |
| LOC729785 | 5.22    | 0.12  |
| LOC729786 | 12.186  | 0.02  |
| LOC729787 | 1.472   | 0     |
| LOC729788 | 0.645   | 0     |
| LOC729789 | 0.489   | 5.69  |
| LOC729790 | 0.171   | 0     |
| LOC729791 | 0.977   | 1.81  |
| LOC729792 | 4.839   | 0     |
| LOC729793 | 1.04    | 0     |
| LOC729794 | 40.167  | 0     |
| LOC729795 | 0.876   | 0.09  |
| LOC729796 | 0.617   | 0.14  |
| LOC729797 | 0.159   | 31.26 |
| LOC729798 | 0.52    | 1.29  |
| LOC729799 | 2.586   | 6.09  |
| LOC729800 | 1.143   | 0     |
| LOC729801 | 0.495   | 0     |
| LOC729802 | 0.306   | 0     |
| LOC729803 | 0.645   | 0     |
| LOC729804 | 0.321   | 0     |
| LOC729805 | 0.705   | 0     |
| LOC729806 | 1.709   | 4.83  |
| LOC729807 | 0.522   | 0     |
| LOC729808 | 0.906   | 0     |
| LOC729809 | 0.309   | 0     |
| LOC729810 | 2.513   | 3.05  |
| LOC729811 | 1.005   | 0.25  |
| LOC729812 | 0.855   | 0     |
| LOC729813 | 0.522   | 0.32  |
| LOC729814 | 0.598   | 0.84  |
| LOC729815 | 0.93    | 0     |
| LOC729816 | 1.034   | 0     |
| LOC729817 | 2.281   | 0.11  |
| LOC729818 | 0.567   | 3.71  |
| LOC729819 | 0.621   | 0     |
| LOC729820 | 0.126   | 0     |
| LOC729821 | 0.777   | 1.84  |
| LOC729822 | 0.977   | 3.54  |
| LOC729823 | 0.939   | 0     |
| LOC729824 | 0.3     | 1.12  |
| LOC729825 | 1.047   | 0     |
| LOC729826 | 3.313   | 2.44  |
| LOC729827 | 0.252   | 0     |
| LOC729828 | 35.27   | 0     |
| LOC729829 | 0.621   | 0     |
| LOC729830 | 106.311 | 0     |
| LOC729831 | 1.335   | 0     |

|           |        |      |
|-----------|--------|------|
| LOC729832 | 7.094  | 0.01 |
| LOC729833 | 0.855  | 0    |
| LOC729834 | 0.834  | 0    |
| LOC729835 | 0.331  | 1.02 |
| LOC729837 | 8.856  | 0    |
| LOC729838 | 2.321  | 0    |
| LOC729839 | 1.153  | 0.73 |
| LOC729840 | 1.967  | 0.34 |
| LOC729841 | 0.812  | 0.21 |
| LOC729842 | 0.845  | 1.69 |
| LOC729843 | 1.216  | 1.66 |
| LOC729844 | 0.471  | 0.71 |
| LOC729845 | 1.119  | 0    |
| LOC729846 | 0.969  | 0.61 |
| LOC729847 | 0.43   | 0    |
| LOC729848 | 0.752  | 0.56 |
| LOC729849 | 0.444  | 0    |
| LOC729850 | 0.751  | 0    |
| LOC729851 | 0.545  | 0.15 |
| LOC729852 | 2.02   | 2.42 |
| LOC729853 | 1.502  | 0    |
| LOC729854 | 0.334  | 0    |
| LOC729855 | 0.366  | 0    |
| LOC729856 | 0.765  | 0    |
| LOC729858 | 0.784  | 0.11 |
| LOC729859 | 1.209  | 1.74 |
| LOC729860 | 2.013  | 3.81 |
| LOC729861 | 0.468  | 0    |
| LOC729862 | 0.39   | 7.56 |
| LOC729863 | 25.392 | 0    |
| LOC729864 | 0.669  | 0    |
| LOC729865 | 1.737  | 0    |
| LOC729867 | 0.547  | 1.08 |
| LOC729868 | 4.689  | 0.07 |
| LOC729869 | 0.255  | 0.66 |
| LOC729870 | 1.059  | 0    |
| LOC729871 | 10.324 | 0.01 |
| LOC729873 | 9.125  | 0    |
| LOC729874 | 0.894  | 0.37 |
| LOC729875 | 1.283  | 0    |
| LOC729877 | 7.886  | 0    |
| LOC729878 | 0.346  | 1.22 |
| LOC729879 | 1.83   | 0    |
| LOC729880 | 0.588  | 0    |
| LOC729881 | 0.702  | 0    |
| LOC729882 | 0.687  | 0.37 |
| LOC729883 | 0.492  | 0    |
| LOC729884 | 2.136  | 0    |
| LOC729885 | 0.979  | 0.17 |
| LOC729886 | 1.065  | 0    |

|           |        |       |
|-----------|--------|-------|
| LOC729887 | 0.952  | 0.98  |
| LOC729888 | 0.894  | 0.37  |
| LOC729889 | 0.543  | 0     |
| LOC729890 | 1.694  | 0     |
| LOC729891 | 0.58   | 0     |
| LOC729892 | 4.028  | 0     |
| LOC729893 | 0.375  | 0     |
| LOC729894 | 41.287 | 0.01  |
| LOC729895 | 0.484  | 0     |
| LOC729896 | 0.366  | 1.84  |
| LOC729897 | 0.416  | 3.24  |
| LOC729898 | 0.411  | 2.46  |
| LOC729899 | 0.363  | 0     |
| LOC729900 | 4.164  | 0.1   |
| LOC729901 | 1.026  | 0     |
| LOC729902 | 0.727  | 0     |
| LOC729903 | 1.582  | 29.12 |
| LOC729904 | 0.681  | 0.99  |
| LOC729905 | 0.438  | 2.12  |
| LOC729906 | 0.329  | 0.51  |
| LOC729907 | 0.694  | 0     |
| LOC729908 | 4.105  | 0     |
| LOC729909 | 0.515  | 3.27  |
| LOC729910 | 0.842  | 0     |
| LOC729911 | 0.528  | 0     |
| LOC729912 | 0.621  | 0     |
| LOC729913 | 1.285  | 0.33  |
| LOC729914 | 0.834  | 0     |
| LOC729915 | 10.37  | 0.01  |
| LOC729916 | 0.444  | 0     |
| LOC729917 | 1.419  | 0.24  |
| LOC729918 | 0.767  | 0     |
| LOC729919 | 0.96   | 0     |
| LOC729920 | 0.849  | 0     |
| LOC729921 | 0.75   | 0     |
| LOC729922 | 0.981  | 0     |
| LOC729923 | 0.261  | 0     |
| LOC729924 | 0.393  | 0     |
| LOC729925 | 0.792  | 0.75  |
| LOC729926 | 0.858  | 1.08  |
| LOC729927 | 0.524  | 1.61  |
| LOC729928 | 0.903  | 0.09  |
| LOC729929 | 0.39   | 0     |
| LOC729930 | 1.08   | 0     |
| LOC729931 | 0.912  | 0     |
| LOC729932 | 0.597  | 0     |
| LOC729933 | 0.396  | 0     |
| LOC729934 | 0.822  | 0.71  |
| LOC729935 | 1.08   | 0     |
| LOC729936 | 17.737 | 0.05  |

|           |        |       |
|-----------|--------|-------|
| LOC729937 | 0.459  | 0     |
| LOC729938 | 0.726  | 0.23  |
| LOC729939 | 0.345  | 0     |
| LOC729940 | 0.643  | 0     |
| LOC729941 | 7.192  | 0.44  |
| LOC729942 | 0.843  | 0     |
| LOC729943 | 0.369  | 0     |
| LOC729944 | 1.643  | 0     |
| LOC729945 | 8.025  | 0.57  |
| LOC729946 | 0.527  | 8.31  |
| LOC729947 | 0.621  | 0     |
| LOC729948 | 0.258  | 51.26 |
| LOC729949 | 0.471  | 0.18  |
| LOC729950 | 0.786  | 0.97  |
| LOC729951 | 0.342  | 0     |
| LOC729952 | 3.202  | 0.26  |
| LOC729953 | 0.498  | 0     |
| LOC729954 | 61.643 | 0.27  |
| LOC729955 | 8.85   | 0.17  |
| LOC729956 | 1.554  | 0     |
| LOC729957 | 0.534  | 0     |
| LOC729958 | 0.573  | 0     |
| LOC729959 | 0.876  | 0     |
| LOC729960 | 75.604 | 0     |
| LOC729961 | 0.753  | 0     |
| LOC729962 | 12.577 | 0.02  |
| LOC729963 | 0.477  | 0.53  |
| LOC729964 | 0.81   | 0.21  |
| LOC729965 | 0.651  | 0     |
| LOC729966 | 0.744  | 0     |
| LOC729967 | 4.675  | 0     |
| LOC729968 | 0.699  | 0     |
| LOC729969 | 0.369  | 10.04 |
| LOC729970 | 0.401  | 0     |
| LOC729971 | 0.929  | 0     |
| LOC729972 | 0.762  | 0     |
| LOC729973 | 0.743  | 19.96 |
| LOC729974 | 0.902  | 0     |
| LOC729976 | 1.069  | 13.24 |
| LOC729977 | 0.382  | 0     |
| LOC729978 | 1.271  | 0     |
| LOC729979 | 0.565  | 0     |
| LOC729980 | 0.708  | 0     |
| LOC729981 | 0.612  | 0     |
| LOC729982 | 0.885  | 0     |
| LOC729983 | 0.888  | 0.19  |
| LOC729984 | 0.991  | 0.08  |
| LOC729985 | 0.258  | 6.86  |
| LOC729986 | 2.216  | 0.03  |
| LOC729987 | 0.567  | 0     |



|           |        |         |
|-----------|--------|---------|
| LOC729988 | 1.066  | 0       |
| LOC729989 | 0.89   | 0.57    |
| LOC729990 | 0.408  | 0       |
| LOC729991 | 0.333  | 11.39   |
| LOC729992 | 0.979  | 0       |
| LOC729993 | 0.671  | 0       |
| LOC729994 | 1.797  | 0       |
| LOC729996 | 0.546  | 0       |
| LOC729997 | 7.481  | 0.08    |
| LOC729998 | 1.432  | 2499.68 |
| LOC729999 | 4.738  | 0.18    |
| LOC730000 | 0.315  | 0.54    |
| LOC730001 | 1.873  | 0.86    |
| LOC730002 | 0.548  | 0.15    |
| LOC730003 | 1.146  | 0       |
| LOC730004 | 0.687  | 2.33    |
| LOC730005 | 1.152  | 0       |
| LOC730006 | 1.32   | 0.83    |
| LOC730007 | 0.446  | 0.19    |
| LOC730008 | 0.846  | 0       |
| LOC730009 | 0.753  | 0       |
| LOC730010 | 0.675  | 2.62    |
| LOC730011 | 0.679  | 0       |
| LOC730012 | 0.423  | 0.2     |
| LOC730013 | 0.795  | 0       |
| LOC730014 | 1.275  | 0.53    |
| LOC730015 | 2.762  | 0       |
| LOC730016 | 1.551  | 1.14    |
| LOC730017 | 0.509  | 0       |
| LOC730018 | 0.525  | 0.16    |
| LOC730019 | 0.645  | 0.39    |
| LOC730020 | 2.167  | 0.04    |
| LOC730021 | 0.762  | 3.65    |
| LOC730022 | 0.789  | 0       |
| LOC730023 | 1.824  | 0       |
| LOC730024 | 17.712 | 0       |
| LOC730025 | 0.973  | 0.17    |
| LOC730026 | 0.45   | 0       |
| LOC730027 | 3.585  | 0       |
| LOC730028 | 0.357  | 0       |
| LOC730029 | 1.172  | 5.1     |
| LOC730030 | 0.435  | 0.39    |
| LOC730031 | 1.543  | 0       |
| LOC730032 | 4.171  | 0       |
| LOC730033 | 0.45   | 0       |
| LOC730034 | 2.186  | 0       |
| LOC730035 | 3.644  | 0       |
| LOC730036 | 2.479  | 0       |
| LOC730037 | 0.741  | 0       |
| LOC730038 | 1.584  | 0.05    |

|           |        |       |
|-----------|--------|-------|
| LOC730039 | 0.183  | 0     |
| LOC730040 | 0.81   | 0.1   |
| LOC730041 | 2.965  | 0.08  |
| LOC730042 | 0.333  | 0     |
| LOC730043 | 21.971 | 0.36  |
| LOC730044 | 0.387  | 0     |
| LOC730045 | 0.516  | 0     |
| LOC730046 | 0.771  | 0.99  |
| LOC730047 | 1.284  | 0     |
| LOC730048 | 0.327  | 0.77  |
| LOC730049 | 0.58   | 0     |
| LOC730050 | 3.503  | 30.97 |
| LOC730051 | 19.925 | 0.5   |
| LOC730052 | 0.688  | 14.44 |
| LOC730053 | 0.524  | 0     |
| LOC730054 | 0.894  | 0     |
| LOC730055 | 0.361  | 0     |
| LOC730056 | 1.251  | 0.2   |
| LOC730057 | 0.489  | 0     |
| LOC730058 | 0.429  | 0     |
| LOC730059 | 1.017  | 0     |
| LOC730060 | 1.079  | 0.54  |
| LOC730061 | 10.815 | 1.39  |
| LOC730062 | 1.419  | 0.36  |
| LOC730063 | 0.873  | 1.06  |
| LOC730064 | 1.556  | 0.27  |
| LOC730065 | 0.585  | 0     |
| LOC730066 | 7.747  | 0.01  |
| LOC730068 | 0.678  | 0     |
| LOC730069 | 8.187  | 0.95  |
| LOC730070 | 0.384  | 14.04 |
| LOC730071 | 0.369  | 1.37  |
| LOC730072 | 0.675  | 0.13  |
| LOC730073 | 0.942  | 0     |
| LOC730074 | 0.474  | 0     |
| LOC730075 | 0.513  | 0     |
| LOC730076 | 22.547 | 0     |
| LOC730077 | 0.969  | 0     |
| LOC730078 | 0.839  | 0     |
| LOC730079 | 0.384  | 0.44  |
| LOC730080 | 0.603  | 0.14  |
| LOC730081 | 2.016  | 0.29  |
| LOC730082 | 0.471  | 0     |
| LOC730083 | 1.02   | 2.64  |
| LOC730084 | 0.516  | 0.49  |
| LOC730085 | 0.45   | 0     |
| LOC730086 | 67.249 | 0.04  |
| LOC730087 | 23.24  | 0.21  |
| LOC730088 | 0.528  | 0     |
| LOC730089 | 0.63   | 0     |

|           |        |       |
|-----------|--------|-------|
| LOC730090 | 1.527  | 0.11  |
| LOC730091 | 0.999  | 0.17  |
| LOC730092 | 33.969 | 0.13  |
| LOC730093 | 0.594  | 0     |
| LOC730094 | 1.431  | 1.12  |
| LOC730095 | 0.594  | 0     |
| LOC730096 | 1.038  | 0.08  |
| LOC730097 | 0.438  | 0     |
| LOC730098 | 0.471  | 0     |
| LOC730099 | 61.22  | 0.12  |
| LOC730100 | 0.563  | 0     |
| LOC730101 | 8.263  | 3.54  |
| LOC730102 | 73.151 | 0.02  |
| LOC730103 | 0.377  | 0     |
| LOC730104 | 0.447  | 0     |
| LOC730105 | 0.541  | 0     |
| LOC730106 | 0.573  | 0     |
| LOC730107 | 1.167  | 2.31  |
| LOC730108 | 1.014  | 3.24  |
| LOC730109 | 1.005  | 0     |
| LOC730110 | 1.593  | 0.32  |
| LOC730111 | 0.828  | 6.2   |
| LOC730112 | 0.828  | 0     |
| LOC730113 | 0.804  | 0     |
| LOC730114 | 0.147  | 0     |
| LOC730115 | 1.543  | 0.99  |
| LOC730116 | 1.293  | 0     |
| LOC730117 | 1.131  | 0     |
| LOC730118 | 0.692  | 0     |
| LOC730119 | 0.78   | 0.43  |
| LOC730120 | 0.691  | 0     |
| LOC730121 | 0.555  | 0     |
| LOC730122 | 0.519  | 0     |
| LOC730123 | 1.152  | 0     |
| LOC730124 | 0.705  | 0     |
| LOC730125 | 0.534  | 2.69  |
| LOC730126 | 0.414  | 0     |
| LOC730127 | 0.429  | 0.59  |
| LOC730128 | 0.351  | 0     |
| LOC730129 | 0.621  | 0     |
| LOC730130 | 1.002  | 0     |
| LOC730131 | 2.539  | 0.14  |
| LOC730132 | 2.247  | 0     |
| LOC730133 | 0.301  | 0.28  |
| LOC730134 | 0.564  | 0     |
| LOC730135 | 0.72   | 0.24  |
| LOC730136 | 0.564  | 10.61 |
| LOC730137 | 0.882  | 0     |
| LOC730138 | 0.489  | 38.42 |
| LOC730139 | 0.953  | 0     |

|           |         |      |
|-----------|---------|------|
| LOC730140 | 0.696   | 0.12 |
| LOC730141 | 0.441   | 0    |
| LOC730142 | 0.75    | 1.23 |
| LOC730143 | 0.627   | 0.27 |
| LOC730144 | 0.867   | 16.9 |
| LOC730145 | 0.491   | 0    |
| LOC730146 | 0.393   | 0    |
| LOC730147 | 0.33    | 0    |
| LOC730148 | 0.426   | 0    |
| LOC730149 | 1.873   | 0.14 |
| LOC730150 | 0.507   | 0.33 |
| LOC730151 | 0.465   | 9.42 |
| LOC730152 | 4.788   | 0    |
| LOC730153 | 1.24    | 0    |
| LOC730154 | 0.135   | 0    |
| LOC730155 | 0.861   | 0    |
| LOC730156 | 0.492   | 0.34 |
| LOC730157 | 0.462   | 0    |
| LOC730158 | 0.384   | 0    |
| LOC730159 | 0.563   | 0    |
| LOC730160 | 2.052   | 0    |
| LOC730161 | 0.483   | 1.22 |
| LOC730162 | 0.363   | 0.47 |
| LOC730163 | 0.583   | 0    |
| LOC730164 | 0.492   | 0    |
| LOC730165 | 0.381   | 0    |
| LOC730166 | 0.495   | 3.41 |
| LOC730167 | 0.513   | 3.45 |
| LOC730168 | 0.531   | 0    |
| LOC730169 | 0.399   | 2.32 |
| LOC730170 | 0.627   | 0    |
| LOC730171 | 0.492   | 0    |
| LOC730172 | 1.022   | 0    |
| LOC730173 | 1.227   | 2.95 |
| LOC730174 | 121.296 | 0.18 |
| LOC730175 | 0.216   | 0    |
| LOC730176 | 1.381   | 0.12 |
| LOC730177 | 0.346   | 0.25 |
| LOC730178 | 0.543   | 0    |
| LOC730179 | 0.852   | 0    |
| LOC730180 | 1.284   | 0.46 |
| LOC730181 | 0.509   | 0    |
| LOC730182 | 0.724   | 8.49 |
| LOC730183 | 0.571   | 2.06 |
| LOC730184 | 0.768   | 0    |
| LOC730185 | 2.2     | 0.04 |
| LOC730186 | 0.387   | 0    |
| LOC730187 | 0.171   | 0    |
| LOC730188 | 0.381   | 7.74 |
| LOC730189 | 0.645   | 0.26 |

|           |       |      |
|-----------|-------|------|
| LOC730190 | 0.213 | 1.59 |
| LOC730191 | 0.822 | 0    |
| LOC730192 | 1.14  | 0.52 |
| LOC730193 | 0.531 | 6.66 |
| LOC730194 | 0.92  | 0    |
| LOC730195 | 0.246 | 0    |
| LOC730196 | 1.04  | 0    |
| LOC730197 | 0.339 | 0.25 |
| LOC730198 | 1.074 | 0    |
| LOC730199 | 0.99  | 0    |
| LOC730200 | 0.744 | 0    |
| LOC730201 | 2.098 | 0.84 |
| LOC730202 | 1.501 | 1.06 |
| LOC730203 | 0.555 | 0    |
| LOC730204 | 0.225 | 0    |
| LOC730205 | 0.315 | 0    |
| LOC730206 | 1.008 | 0    |
| LOC730207 | 0.624 | 0    |
| LOC730208 | 0.666 | 0.38 |
| LOC730209 | 0.351 | 0    |
| LOC730210 | 0.955 | 0    |
| LOC730211 | 4.676 | 0.05 |
| LOC730212 | 0.351 | 0    |
| LOC730213 | 0.963 | 7.96 |
| LOC730214 | 0.363 | 0    |
| LOC730215 | 1.575 | 0    |
| LOC730216 | 0.777 | 0    |
| LOC730217 | 0.814 | 0    |
| LOC730218 | 0.885 | 0    |
| LOC730219 | 1.204 | 0    |
| LOC730220 | 0.57  | 0    |
| LOC730221 | 0.375 | 0    |
| LOC730222 | 0.681 | 0.13 |
| LOC730223 | 0.438 | 0    |
| LOC730224 | 0.741 | 0    |
| LOC730225 | 0.648 | 0.39 |
| LOC730226 | 0.715 | 0.12 |
| LOC730227 | 0.41  | 0    |
| LOC730228 | 1.029 | 0.16 |
| LOC730229 | 2.116 | 0    |
| LOC730230 | 0.988 | 0    |
| LOC730231 | 0.651 | 0.65 |
| LOC730232 | 3.661 | 0.51 |
| LOC730233 | 0.906 | 0.28 |
| LOC730234 | 0.705 | 0    |
| LOC730235 | 0.873 | 0.29 |
| LOC730236 | 1.472 | 0.69 |
| LOC730237 | 0.435 | 0    |
| LOC730238 | 0.531 | 0    |
| LOC730239 | 1.069 | 0.79 |

|           |        |      |
|-----------|--------|------|
| LOC730240 | 0.541  | 0    |
| LOC730241 | 0.904  | 0.37 |
| LOC730242 | 0.559  | 0    |
| LOC730243 | 0.912  | 0    |
| LOC730244 | 0.441  | 0.95 |
| LOC730245 | 1.698  | 0.2  |
| LOC730246 | 1.311  | 0.57 |
| LOC730247 | 0.474  | 0    |
| LOC730248 | 0.795  | 0    |
| LOC730249 | 2.361  | 0    |
| LOC730250 | 0.891  | 0    |
| LOC730251 | 0.996  | 0.08 |
| LOC730252 | 0.912  | 0.37 |
| LOC730253 | 0.621  | 0    |
| LOC730254 | 2.465  | 0.34 |
| LOC730255 | 0.566  | 0.59 |
| LOC730256 | 8.176  | 0    |
| LOC730257 | 8.141  | 0.01 |
| LOC730258 | 1.861  | 1.14 |
| LOC730259 | 1.091  | 0    |
| LOC730260 | 0.981  | 0    |
| LOC730261 | 0.975  | 0    |
| LOC730262 | 1.143  | 0    |
| LOC730263 | 2.124  | 0.04 |
| LOC730264 | 1.242  | 0    |
| LOC730265 | 0.594  | 0    |
| LOC730266 | 0.537  | 1.89 |
| LOC730267 | 1.038  | 0.73 |
| LOC730268 | 58.447 | 0.06 |
| LOC730269 | 1.649  | 0.15 |
| LOC730270 | 1.113  | 0    |
| LOC730271 | 0.564  | 0    |
| LOC730272 | 1.191  | 0    |
| LOC730273 | 2.783  | 0    |
| LOC730274 | 0.876  | 0    |
| LOC730275 | 3.983  | 0    |
| LOC730276 | 0.369  | 0    |
| LOC730277 | 0.429  | 0    |
| LOC730278 | 0.309  | 0    |
| LOC730279 | 0.828  | 0    |
| LOC730280 | 0.762  | 0    |
| LOC730281 | 2.025  | 0    |
| LOC730282 | 0.771  | 0    |
| LOC730283 | 0.429  | 0    |
| LOC730284 | 1.857  | 0    |
| LOC730285 | 0.357  | 0    |
| LOC730286 | 0.999  | 0    |
| LOC730287 | 0.958  | 0    |
| LOC730288 | 0.21   | 0    |
| LOC730289 | 0.333  | 0.25 |

|           |       |      |
|-----------|-------|------|
| LOC730290 | 1.293 | 0    |
| LOC730291 | 0.57  | 0    |
| LOC730292 | 1.481 | 0    |
| LOC730293 | 0.213 | 0    |
| LOC730294 | 0.798 | 0    |
| LOC730295 | 1.988 | 0    |
| LOC730296 | 0.285 | 0    |
| LOC730297 | 0.588 | 0    |
| LOC730298 | 0.456 | 0    |
| LOC730299 | 0.255 | 0    |
| LOC730300 | 0.594 | 0    |
| LOC730301 | 0.246 | 0    |
| LOC730302 | 0.615 | 0    |
| LOC730303 | 3.106 | 0    |
| LOC730304 | 2.271 | 0    |
| LOC730305 | 0.33  | 0    |
| LOC730306 | 0.489 | 0    |
| LOC730307 | 2.271 | 0    |
| LOC730308 | 0.129 | 0    |
| LOC730309 | 1.452 | 0.23 |
| LOC730310 | 1.152 | 0    |
| LOC730311 | 1.002 | 0    |
| LOC730312 | 1.613 | 0    |
| LOC730313 | 0.768 | 0    |
| LOC730314 | 0.258 | 0    |
| LOC730315 | 0.33  | 0    |
| LOC730316 | 4.566 | 0.09 |
| LOC730317 | 0.861 | 0    |
| LOC730318 | 0.483 | 0    |
| LOC730319 | 0.492 | 0    |
| LOC730320 | 1.062 | 0.08 |
| LOC730321 | 0.495 | 0    |
| LOC730322 | 0.99  | 0.17 |
| LOC730323 | 1.214 | 0.69 |
| LOC730324 | 0.768 | 0    |
| LOC730325 | 0.384 | 0    |
| LOC730326 | 0.543 | 0    |
| LOC730327 | 0.45  | 0    |
| LOC730328 | 1.107 | 0.15 |
| LOC730329 | 1.2   | 0    |
| LOC730330 | 0.432 | 0    |
| LOC730331 | 1.125 | 3.22 |
| LOC730332 | 1.849 | 0    |
| LOC730333 | 0.576 | 0    |
| LOC730334 | 0.777 | 0    |
| LOC730335 | 0.375 | 0.22 |
| LOC730336 | 0.897 | 0    |
| LOC730337 | 0.492 | 0    |
| LOC730338 | 1.947 | 0    |
| LOC730339 | 1.069 | 0    |

|           |       |      |
|-----------|-------|------|
| LOC730340 | 2.216 | 0.08 |
| LOC730341 | 1.873 | 0.14 |
| LOC730342 | 0.912 | 0    |
| LOC730343 | 0.24  | 0    |
| LOC730344 | 2.421 | 0    |
| LOC730345 | 0.549 | 0    |
| LOC730346 | 0.438 | 0    |
| LOC730347 | 5.571 | 0    |
| LOC730348 | 1.405 | 0.3  |
| LOC730349 | 1.662 | 0.25 |
| LOC730350 | 4.765 | 0    |
| LOC730351 | 2.315 | 0    |
| LOC730352 | 0.714 | 0    |
| LOC730353 | 1.213 | 2.29 |
| LOC730354 | 0.429 | 0    |
| LOC730355 | 0.732 | 0    |
| LOC730356 | 0.834 | 0    |
| LOC730357 | 0.774 | 0    |
| LOC730358 | 2.02  | 0    |
| LOC730359 | 1.694 | 0    |
| LOC730360 | 0.849 | 0    |
| LOC730361 | 0.345 | 0    |
| LOC730362 | 0.762 | 0    |
| LOC730363 | 0.546 | 0    |
| LOC730364 | 0.282 | 0    |
| LOC730365 | 0.81  | 0    |
| LOC730366 | 0.357 | 0    |
| LOC730367 | 1.059 | 0    |
| LOC730368 | 0.363 | 0    |
| LOC730369 | 1.131 | 0    |
| LOC730370 | 1.689 | 0    |
| LOC730371 | 0.492 | 0    |
| LOC730372 | 1.14  | 0    |
| LOC730373 | 0.246 | 0    |
| LOC730374 | 0.648 | 1.17 |
| LOC730375 | 0.705 | 0    |
| LOC730376 | 0.873 | 0    |
| LOC730377 | 0.444 | 0    |
| LOC730378 | 0.9   | 0    |
| LOC730379 | 0.444 | 0    |
| LOC730380 | 0.444 | 0    |
| LOC730381 | 0.519 | 0    |
| LOC730382 | 0.486 | 0    |
| LOC730383 | 0.39  | 0    |
| LOC730384 | 0.681 | 0    |
| LOC730385 | 0.681 | 0    |
| LOC730386 | 0.681 | 0    |
| LOC730387 | 0.681 | 0    |
| LOC730388 | 0.681 | 0    |
| LOC730389 | 1.152 | 0    |



|           |        |       |
|-----------|--------|-------|
| LOC730390 | 0.817  | 0     |
| LOC730391 | 0.981  | 0     |
| LOC730392 | 13.677 | 0     |
| LOC730393 | 0.585  | 0     |
| LOC730394 | 4.558  | 0     |
| LOC730395 | 0.566  | 0     |
| LOC730397 | 0.593  | 0     |
| LOC730398 | 0.201  | 0     |
| LOC730399 | 5.046  | 0     |
| LOC730400 | 0.645  | 0     |
| LOC730401 | 4.566  | 0     |
| LOC730402 | 1.054  | 0     |
| LOC730403 | 0.566  | 0     |
| LOC730404 | 0.662  | 0     |
| LOC730405 | 0.466  | 0     |
| LOC730406 | 0.593  | 0     |
| LOC730407 | 1.437  | 0     |
| LOC730408 | 0.645  | 0.13  |
| LOC730409 | 4.566  | 0     |
| LOC730410 | 1.853  | 0     |
| LOC732478 | 1.347  | 0     |
| LOC79984  | 3.889  | 0.08  |
| LOC80098  | 2.046  | 0.2   |
| LOC81625  | 1.938  | 0.48  |
| LOC81691  | 2.707  | 1.37  |
| LOC83459  | 0.751  | 5.83  |
| LOC84661  | 0.8    | 17.16 |
| LOC85389  | 0.211  | 3.2   |
| LOC85390  | 0.228  | 2.22  |
| LOC86123  | 1.52   | 0.06  |
| LOC89944  | 3.117  | 0.46  |
| LOC90113  | 4.155  | 0.06  |
| LOC90120  | 2.799  | 12.31 |
| LOC90342  | 6.872  | 0     |
| LOC90379  | 2.258  | 17.42 |
| LOC90499  | 0.385  | 0     |
| LOC90586  | 2.073  | 0     |
| LOC90826  | 2.83   | 2.68  |
| LOC90835  | 1.829  | 0.74  |
| LOC91219  | 0.501  | 0.5   |
| LOC91431  | 3.113  | 0.76  |
| LOC91461  | 1.881  | 0.4   |
| LOC91664  | 3.985  | 0.65  |
| LOC92017  | 2.941  | 5.7   |
| LOC92196  | 0.532  | 0     |
| LOC92270  | 0.758  | 1     |
| LOC92312  | 5.917  | 1.92  |
| LOC92345  | 1.907  | 3.14  |
| LOC92755  | 1.516  | 15.72 |
| LOC93202  | 1.21   | 0.14  |

|           |       |       |
|-----------|-------|-------|
| LOC93349  | 3.588 | 6.46  |
| LOC93432  | 3.068 | 0     |
| LOC93622  | 2.052 | 6.32  |
| LOC96597  | 1.629 | 0     |
| LOC96610  | 0.702 | 5.52  |
| LOH11CR2A | 4.022 | 0.06  |
| LOH12CR1  | 2.05  | 1.61  |
| LOH3CR2A  | 1.686 | 0.15  |
| LONP1     | 3.111 | 20.45 |
| LONP2     | 4.802 | 10.56 |
| LONRF1    | 3.584 | 0.35  |
| LONRF2    | 2.363 | 0.21  |
| LONRF3    | 2.608 | 0.03  |
| LOR       | 1.206 | 0     |
| LOX       | 1.947 | 0.04  |
| LOXHD1    | 4.775 | 0     |
| LOXL1     | 2.361 | 6.14  |
| LOXL2     | 3.81  | 1.35  |
| LOXL3     | 3.121 | 2.02  |
| LOXL4     | 3.657 | 0.07  |
| LPA       | 6.065 | 0.03  |
| LPAL2     | 2.25  | 0.07  |
| LPGAT1    | 6.252 | 3.37  |
| LPHN1     | 7.857 | 9.28  |
| LPHN2     | 5.706 | 0.02  |
| LPHN3     | 6.177 | 0     |
| LPIN1     | 5.358 | 4.14  |
| LPIN2     | 6.229 | 7.79  |
| LPIN3     | 4.363 | 0.71  |
| LPL       | 3.55  | 0.19  |
| LPO       | 2.918 | 0.31  |
| LPP       | 8.529 | 3.51  |
| LPPR2     | 2.678 | 0.48  |
| LPPR4     | 4.972 | 0     |
| LPXN      | 1.833 | 7.03  |
| LRAP      | 3.337 | 0.65  |
| LRAT      | 4.888 | 0     |
| LRBA      | 9.899 | 2.78  |
| LRCH1     | 5.258 | 5.06  |
| LRCH2     | 4.931 | 0     |
| LRCH3     | 2.258 | 5.11  |
| LRCH4     | 6.402 | 26.56 |
| LRDD      | 4.094 | 5.57  |
| LRFN1     | 3.381 | 5.7   |
| LRFN2     | 3.144 | 7.96  |
| LRFN3     | 2.515 | 3.55  |
| LRFN4     | 2.431 | 10.43 |
| LRFN5     | 3.153 | 0     |
| LRG1      | 1.78  | 0.76  |
| LRGUK     | 5.4   | 0.05  |

|          |        |       |
|----------|--------|-------|
| LRIG1    | 4.762  | 7.77  |
| LRIG2    | 4.015  | 1.95  |
| LRIG3    | 4.023  | 0     |
| LRMP     | 2.809  | 33.58 |
| LRP1     | 14.897 | 0.54  |
| LRP10    | 3.252  | 28.96 |
| LRP11    | 3.58   | 3.55  |
| LRP12    | 4.06   | 0     |
| LRP16    | 1.19   | 9.2   |
| LRP1B    | 16.531 | 0     |
| LRP2     | 14.385 | 0     |
| LRP2BP   | 5.157  | 0.1   |
| LRP3     | 2.577  | 17.75 |
| LRP4     | 8.076  | 0.01  |
| LRP5     | 5.099  | 29.75 |
| LRP5L    | 3.568  | 4.23  |
| LRP6     | 5.293  | 1.27  |
| LRP8     | 6.222  | 0.8   |
| LRPAP1   | 1.484  | 44.95 |
| LRPPRC   | 5.095  | 17.33 |
| LRRC1    | 3.465  | 0.03  |
| LRRC10   | 2.599  | 0     |
| LRRC14   | 5.876  | 6.15  |
| LRRC15   | 5.938  | 0.49  |
| LRRC16   | 5.175  | 0.08  |
| LRRC17   | 5.726  | 1.9   |
| LRRC18   | 2.287  | 6.37  |
| LRRC19   | 3.136  | 0     |
| LRRC2    | 5.669  | 0     |
| LRRC20   | 3.236  | 0.99  |
| LRRC21   | 2.099  | 0     |
| LRRC22   | 3.128  | 0     |
| LRRC23   | 1.925  | 2.36  |
| LRRC24   | 1.753  | 3.08  |
| LRRC25   | 2.403  | 0.59  |
| LRRC27   | 6.374  | 0.7   |
| LRRC28   | 1.45   | 6.57  |
| LRRC29   | 1.493  | 1.3   |
| LRRC3    | 2.505  | 0.81  |
| LRRC30   | 0.906  | 0     |
| LRRC31   | 2.355  | 0     |
| LRRC32   | 4.157  | 0.02  |
| LRRC33   | 2.465  | 35.54 |
| LRRC34   | 1.437  | 0.29  |
| LRRC36   | 2.396  | 0     |
| LRRC37A  | 5.177  | 1.12  |
| LRRC37A2 | 3.594  | 3.33  |
| LRRC37A3 | 5.665  | 0.55  |
| LRRC37B  | 3.027  | 3.67  |
| LRRC38   | 2.28   | 0.03  |

|         |       |       |
|---------|-------|-------|
| LRRC39  | 1.394 | 0     |
| LRRC3B  | 1.693 | 0.8   |
| LRRC4   | 7.414 | 1.71  |
| LRRC40  | 2.847 | 1.9   |
| LRRC41  | 2.948 | 35.23 |
| LRRC42  | 1.714 | 5.9   |
| LRRC43  | 2.293 | 0.14  |
| LRRC44  | 1.591 | 0.05  |
| LRRC45  | 2.599 | 5.25  |
| LRRC46  | 1.429 | 2.3   |
| LRRC47  | 2.648 | 21.15 |
| LRRC48  | 1.978 | 0.55  |
| LRRC49  | 2.793 | 0     |
| LRRC4B  | 2.958 | 0.37  |
| LRRC4C  | 4.054 | 0     |
| LRRC50  | 2.379 | 0.07  |
| LRRC51  | 2.12  | 1.03  |
| LRRC52  | 1.369 | 0     |
| LRRC55  | 3.797 | 0     |
| LRRC56  | 2.769 | 1.22  |
| LRRC57  | 2.647 | 3.43  |
| LRRC58  | 8.099 | 0.83  |
| LRRC59  | 2.828 | 31.9  |
| LRRC6   | 1.582 | 0.26  |
| LRRC61  | 2.956 | 3.5   |
| LRRC62  | 7.762 | 40.87 |
| LRRC7   | 5     | 0     |
| LRRC8A  | 4.296 | 7.63  |
| LRRC8B  | 3.589 | 0.78  |
| LRRC8C  | 2.859 | 13.44 |
| LRRC8D  | 3.312 | 8.8   |
| LRRC8E  | 3.601 | 0.12  |
| LRRC1   | 3.24  | 2.11  |
| LRRFIP1 | 3.648 | 33.16 |
| LRRFIP2 | 3.283 | 6.14  |
| LRRIQ1  | 4.457 | 0     |
| LRRIQ2  | 4.411 | 0.88  |
| LRRK1   | 7.631 | 5.2   |
| LRRK2   | 9.224 | 0.04  |
| LRRN1   | 3.307 | 0     |
| LRRN2   | 3.358 | 3.99  |
| LRRN3   | 6.74  | 0     |
| LRRTM1  | 2.212 | 0     |
| LRRTM2  | 5.58  | 0.04  |
| LRRTM3  | 3.787 | 0     |
| LRRTM4  | 3.616 | 0     |
| LRSAM1  | 3.509 | 3.46  |
| LRTM1   | 1.298 | 0     |
| LRTM2   | 3.688 | 0     |
| LSAMP   | 1.539 | 0     |

|           |       |        |
|-----------|-------|--------|
| LSDP5     | 1.888 | 0      |
| LSG1      | 3.271 | 10.07  |
| LSM1      | 0.921 | 16.92  |
| LSM10     | 0.85  | 24.68  |
| LSM11     | 2.561 | 0.16   |
| LSM12     | 2.21  | 9.37   |
| LSM14A    | 3.384 | 33.68  |
| LSM14B    | 2.498 | 29.1   |
| LSM2      | 2.574 | 0      |
| LSM3      | 0.555 | 55.7   |
| LSM4      | 1.109 | 55.07  |
| LSM5      | 1.464 | 3.51   |
| LSM6      | 0.579 | 22.7   |
| LSM7      | 0.48  | 170.58 |
| LSM8      | 2.614 | 6.99   |
| LSMD1     | 0.999 | 47.64  |
| LSP1      | 2.745 | 62.84  |
| LSR       | 2.278 | 1.51   |
| LSS       | 4.624 | 5.63   |
| LST1      | 4.947 | 0      |
| LST-3TM12 | 2.119 | 0      |
| LTA       | 4.158 | 0.08   |
| LTA4H     | 2.06  | 40.56  |
| LTB       | 4.5   | 0      |
| LTB4DH    | 1.242 | 20.28  |
| LTB4R     | 3.436 | 15.17  |
| LTB4R2    | 3.16  | 6.59   |
| LTBP1     | 6.484 | 0.08   |
| LTBP2     | 8.554 | 0.27   |
| LTBP3     | 4.048 | 15.94  |
| LTBP4     | 5.352 | 8.11   |
| LTBR      | 2.105 | 21.49  |
| LTC4S     | 0.667 | 4.55   |
| LTF       | 2.361 | 32.22  |
| LTK       | 3.119 | 0.81   |
| LTV1      | 1.814 | 10.63  |
| LUC7L     | 2.615 | 10.11  |
| LUC7L2    | 4.822 | 14.94  |
| LUM       | 2.116 | 0.04   |
| LUZP1     | 7.539 | 7.06   |
| LUZP2     | 5.257 | 0.02   |
| LUZP4     | 1.728 | 0      |
| LXN       | 1.113 | 9.69   |
| LY6D      | 0.802 | 0      |
| LY6E      | 1.15  | 78.52  |
| LY6G5B    | 2.322 | 0.07   |
| LY6G5C    | 5.259 | 0      |
| LY6G6C    | 2.64  | 0      |
| LY6G6D    | 1.206 | 0      |
| LY6G6E    | 1.152 | 0      |

|          |        |        |
|----------|--------|--------|
| LY6H     | 0.947  | 18.59  |
| LY6K     | 1.735  | 0.05   |
| LY75     | 6.906  | 1.39   |
| LY86     | 2.099  | 11.84  |
| LY9      | 3.366  | 1.08   |
| LY96     | 0.587  | 1.15   |
| LYAR     | 1.508  | 15.47  |
| LYCAT    | 5.342  | 1.34   |
| LYG2     | 0.87   | 0      |
| LYK5     | 4.162  | 8.34   |
| LYL1     | 1.49   | 46.3   |
| LYN      | 2.816  | 13.16  |
| LYNX1    | 6.328  | 0.03   |
| LYPD1    | 1.891  | 0      |
| LYPD2    | 0.534  | 0      |
| LYPD3    | 1.706  | 0      |
| LYPD4    | 1.792  | 0      |
| LYPD5    | 3.616  | 0.51   |
| LYPD6    | 3.485  | 0      |
| LYPLA1   | 2.574  | 9.81   |
| LYPLA2   | 1.624  | 14.16  |
| LYPLA2P1 | 2.429  | 0.14   |
| LYPLA3   | 2.723  | 7.92   |
| LYPLAL1  | 0.816  | 4.95   |
| LYRM1    | 1.659  | 4.42   |
| LYRM2    | 0.873  | 3.09   |
| LYRM4    | 1.482  | 37.4   |
| LYRM5    | 1.06   | 3.26   |
| LYRM7    | 6.213  | 1.84   |
| LYSMD1   | 2.42   | 2.16   |
| LYSMD2   | 1.688  | 3.84   |
| LYSMD3   | 4.261  | 0.69   |
| LYSMD4   | 2.885  | 4.33   |
| LYST     | 14.528 | 1.21   |
| LYZ      | 1.486  | 26.13  |
| LYZL1    | 0.812  | 0      |
| LYZL2    | 0.774  | 0      |
| LYZL4    | 0.872  | 0      |
| LYZL6    | 0.872  | 0      |
| LZIC     | 1.407  | 9.76   |
| LZTFL1   | 3.398  | 3.4    |
| LZTR1    | 4.217  | 13.74  |
| LZTR2    | 3.985  | 0.51   |
| LZTS1    | 5.459  | 2.18   |
| LZTS2    | 2.744  | 29.59  |
| M6PR     | 2.454  | 60.65  |
| M6PRBP1  | 2.236  | 112.45 |
| MAB21L1  | 2.449  | 0      |
| MAB21L2  | 2.543  | 0      |
| MACF1    | 24.222 | 9.6    |

|          |        |       |
|----------|--------|-------|
| MAD1L1   | 10.854 | 21.94 |
| MAD2L1   | 1.376  | 5.08  |
| MAD2L1BP | 1.63   | 3.93  |
| MAD2L1P  | 1.285  | 2.36  |
| MAD2L2   | 1.041  | 42    |
| MADCAM1  | 1.536  | 0.05  |
| MADD     | 8.405  | 10.51 |
| MAEA     | 2.189  | 22.97 |
| MAEL     | 1.731  | 0     |
| MAF      | 7.719  | 9.46  |
| MAF1     | 1.762  | 74.58 |
| MAFA     | 1.062  | 0     |
| MAFB     | 3.791  | 48.64 |
| MAFF     | 2.549  | 2.48  |
| MAFG     | 5.218  | 6.08  |
| MAFK     | 6.7    | 3.85  |
| MAG      | 2.94   | 0     |
| MAG1     | 2.534  | 0.14  |
| MAGEA1   | 1.676  | 0     |
| MAGEA10  | 1.61   | 0     |
| MAGEA11  | 2.083  | 0     |
| MAGEA12  | 1.652  | 0     |
| MAGEA2   | 2.291  | 0     |
| MAGEA2B  | 1.617  | 0     |
| MAGEA3   | 1.724  | 0     |
| MAGEA4   | 1.955  | 0     |
| MAGEA5   | 1.692  | 0     |
| MAGEA6   | 1.828  | 0     |
| MAGEA7   | 0.278  | 0     |
| MAGEA8   | 1.777  | 0     |
| MAGEA9   | 1.807  | 0     |
| MAGEB1   | 1.968  | 0     |
| MAGEB10  | 1.567  | 0     |
| MAGEB18  | 1.811  | 0     |
| MAGEB2   | 1.607  | 0.1   |
| MAGEB3   | 2.303  | 0.03  |
| MAGEB4   | 2.142  | 0     |
| MAGEB5   | 1.111  | 0     |
| MAGEB6   | 1.949  | 0     |
| MAGEB6B  | 1.224  | 0     |
| MAGEC1   | 4.279  | 0     |
| MAGEC2   | 1.992  | 0     |
| MAGEC3   | 3.5    | 0     |
| MAGED1   | 2.971  | 40.77 |
| MAGED2   | 2.289  | 23.99 |
| MAGED4   | 3.258  | 10.55 |
| MAGEE1   | 3.628  | 0.16  |
| MAGEE2   | 2.249  | 0     |
| MAGEF1   | 1.682  | 12.52 |
| MAGEH1   | 1.462  | 7.26  |

|           |        |       |
|-----------|--------|-------|
| MAGEL2    | 2.295  | 0     |
| MAGI1     | 12.591 | 3.03  |
| MAGI2     | 13.76  | 0.47  |
| MAGI3     | 4.154  | 3.51  |
| Magmas    | 0.511  | 27.03 |
| MAGOH     | 0.681  | 42.8  |
| MAGOHP    | 1.071  | 1.41  |
| MAK       | 3.83   | 0.22  |
| MAK10     | 2.649  | 2.99  |
| MAL       | 1.056  | 0.88  |
| MAL2      | 2.796  | 0     |
| MALAT1    | 8.356  | 66.04 |
| MALL      | 2.566  | 0.07  |
| MALT1     | 5.029  | 2.78  |
| MAMDC1    | 4.727  | 0     |
| MAMDC2    | 3.595  | 0     |
| MAMDC4    | 3.658  | 1.56  |
| MAML1     | 5.72   | 7.64  |
| MAML2     | 5.428  | 5.28  |
| MAML3     | 7.101  | 8.45  |
| MAN1A1    | 4.34   | 19.62 |
| MAN1A2    | 5.388  | 3.33  |
| MAN1B1    | 2.769  | 16.89 |
| MAN1C1    | 2.884  | 7.74  |
| MAN2A1    | 5.128  | 1.09  |
| MAN2A2    | 6.269  | 6.48  |
| MAN2B1    | 3.461  | 41.18 |
| MAN2B2    | 4.242  | 8.97  |
| MAN2C1    | 3.254  | 28.19 |
| MANBA     | 3.311  | 7.2   |
| MANBAL    | 1.315  | 9.93  |
| MANEA     | 4.574  | 0.88  |
| MANEAL    | 4.449  | 2.48  |
| MANSC1    | 2.297  | 0.11  |
| MAOA      | 4.073  | 0.02  |
| MAOB      | 2.555  | 0.1   |
| MAP1A     | 10.244 | 6.9   |
| MAP1B     | 9.893  | 0.03  |
| MAP1D     | 1.534  | 1.38  |
| MAP1LC3A  | 1.121  | 1.27  |
| MAP1LC3B  | 2.27   | 33.32 |
| MAP1LC3C  | 1.182  | 0     |
| MAP1LC3P  | 0.625  | 0     |
| MAP1S     | 3.276  | 27.23 |
| MAP2      | 9.989  | 0.03  |
| MAP2K1    | 2.172  | 20.09 |
| MAP2K1IP1 | 1.556  | 10.34 |
| MAP2K1P1  | 0.19   | 0     |
| MAP2K2    | 1.734  | 69.95 |
| MAP2K3    | 2.864  | 14.21 |



|           |        |       |
|-----------|--------|-------|
| MAP2K4    | 3.743  | 3.91  |
| MAP2K5    | 2.364  | 8.73  |
| MAP2K6    | 1.869  | 0     |
| MAP2K7    | 3.372  | 15.92 |
| MAP3K1    | 7.719  | 1.72  |
| MAP3K10   | 3.428  | 4.74  |
| MAP3K11   | 3.573  | 44.91 |
| MAP3K12   | 3.661  | 4.88  |
| MAP3K13   | 3.557  | 0.03  |
| MAP3K14   | 4.582  | 3.59  |
| MAP3K15   | 5.164  | 2.25  |
| MAP3K2    | 4.941  | 2.34  |
| MAP3K3    | 4.826  | 10.65 |
| MAP3K4    | 5.484  | 4.5   |
| MAP3K5    | 6.067  | 6.57  |
| MAP3K6    | 4.328  | 1.21  |
| MAP3K7    | 4.203  | 7.72  |
| MAP3K7IP1 | 3.862  | 10.15 |
| MAP3K7IP2 | 4.152  | 20.71 |
| MAP3K7IP3 | 3.782  | 2.8   |
| MAP3K8    | 3.096  | 1.06  |
| MAP3K9    | 5.602  | 0     |
| MAP4      | 10.375 | 16.24 |
| MAP4K1    | 2.692  | 14.52 |
| MAP4K2    | 2.955  | 29.22 |
| MAP4K3    | 4.113  | 1.6   |
| MAP4K4    | 7.762  | 49.09 |
| MAP4K5    | 4.614  | 4.21  |
| MAP6      | 5.793  | 0     |
| MAP6D1    | 2.104  | 0.6   |
| MAP7      | 3.99   | 0.04  |
| MAP7D1    | 3.324  | 32.59 |
| MAP7D2    | 3.532  | 1.05  |
| MAP7D3    | 4.528  | 6.1   |
| MAP9      | 7.333  | 0     |
| MAPBPIP   | 0.591  | 58.15 |
| MAPK1     | 6.09   | 20.28 |
| MAPK10    | 4.569  | 0.08  |
| MAPK11    | 2.388  | 12.14 |
| MAPK12    | 1.754  | 8.21  |
| MAPK13    | 1.888  | 6.47  |
| MAPK14    | 6.577  | 8.81  |
| MAPK15    | 2.24   | 0     |
| MAPK3     | 2.244  | 23.57 |
| MAPK4     | 4.736  | 0     |
| MAPK6     | 4.189  | 3.22  |
| MAPK6PS1  | 5.207  | 0.05  |
| MAPK6PS2  | 4.007  | 0     |
| MAPK6PS3  | 4.145  | 0     |
| MAPK6PS4  | 4.049  | 0.08  |

|          |       |        |
|----------|-------|--------|
| MAPK6PS5 | 2.114 | 0.16   |
| MAPK6PS6 | 3.332 | 0.08   |
| MAPK7    | 4.378 | 1.9    |
| MAPK8    | 1.746 | 3.76   |
| MAPK8IP1 | 3.05  | 0.14   |
| MAPK8IP2 | 4.178 | 0      |
| MAPK8IP3 | 5.624 | 16.61  |
| MAPK9    | 3.02  | 5.69   |
| MAPKAP1  | 3.866 | 19.61  |
| MAPKAPK2 | 5.296 | 14.88  |
| MAPKAPK3 | 3.575 | 53.27  |
| MAPKAPK5 | 2.16  | 10.1   |
| MAPKBP1  | 7.152 | 28.16  |
| MAPRE1   | 2.543 | 43.89  |
| MAPRE2   | 2.848 | 20.41  |
| MAPRE3   | 1.87  | 0.14   |
| MAPT     | 6.682 | 0.01   |
| MARCH1   | 1.79  | 0.05   |
| MARCH2   | 1.653 | 10.29  |
| MARCH3   | 1.803 | 4.67   |
| MARCH4   | 4.446 | 0.02   |
| MARCH5   | 3.926 | 5.73   |
| MARCH6   | 5.43  | 10.81  |
| MARCH7   | 3.468 | 17.06  |
| MARCH8   | 4.615 | 9.97   |
| MARCH9   | 2.462 | 1.33   |
| MARCKS   | 2.59  | 0.36   |
| MARCKSL1 | 1.535 | 194.87 |
| MARCO    | 1.835 | 0      |
| MARK1    | 4.638 | 0      |
| MARK2    | 3.821 | 10.32  |
| MARK3    | 3.39  | 15.03  |
| MARK4    | 4.917 | 11.31  |
| MARS     | 2.795 | 31.94  |
| MARS2    | 3.028 | 1.78   |
| MARVELD1 | 3.217 | 41.05  |
| MARVELD2 | 6.667 | 0      |
| MARVELD3 | 3.384 | 0      |
| MAS1     | 1.135 | 0      |
| MAS1L    | 3.411 | 0      |
| MASK-BP3 | 8.319 | 7.41   |
| MASP1    | 7.405 | 0      |
| MASP2    | 2.6   | 0.94   |
| MAST1    | 4.833 | 0.03   |
| MAST2    | 5.738 | 5.46   |
| MAST3    | 5.896 | 13.76  |
| MASTL    | 3.084 | 2.32   |
| MAT1A    | 3.404 | 0.03   |
| MAT2A    | 2.819 | 55.25  |
| MAT2B    | 2.272 | 23.62  |

|        |       |        |
|--------|-------|--------|
| MATE2  | 2.235 | 0      |
| MATK   | 2.61  | 7.65   |
| MATN1  | 2.413 | 0      |
| MATN2  | 4.188 | 0.12   |
| MATN3  | 2.583 | 1.21   |
| MATN4  | 2.075 | 0      |
| MATR3  | 5.015 | 55.82  |
| MAX    | 4.541 | 17.1   |
| MAZ    | 2.83  | 179.79 |
| MB     | 1.397 | 10.49  |
| MBD1   | 4.903 | 12.32  |
| MBD2   | 3.01  | 12.68  |
| MBD3   | 2.559 | 41.12  |
| MBD3L1 | 0.664 | 0      |
| MBD3L2 | 0.777 | 0      |
| MBD4   | 2.47  | 8.86   |
| MBD5   | 5.311 | 1      |
| MBD6   | 4.15  | 17.98  |
| MBIP   | 1.605 | 3.2    |
| MBL1P1 | 4.366 | 0      |
| MBL2   | 3.569 | 0      |
| MBNL1  | 9.993 | 13.18  |
| MBNL2  | 7.503 | 0.97   |
| MBNL3  | 4.08  | 4.81   |
| MBOAT1 | 3.275 | 2.42   |
| MBOAT2 | 3.804 | 1.4    |
| MBOAT4 | 1.283 | 0.39   |
| MBOAT5 | 2.297 | 18.15  |
| MBP    | 9.371 | 5.34   |
| MBTD1  | 2.564 | 1.78   |
| MBTPS1 | 5.313 | 14.43  |
| MBTPS2 | 1.759 | 1.87   |
| MC1R   | 2.36  | 1.67   |
| MC2R   | 3.652 | 0      |
| MC3R   | 1.083 | 0      |
| MC4R   | 0.999 | 0      |
| MC5R   | 0.978 | 0      |
| MCAM   | 3.332 | 48.54  |
| MCART1 | 1.54  | 3.89   |
| MCART2 | 1.041 | 0      |
| MCART6 | 6.224 | 0.96   |
| MCAT   | 1.981 | 8.85   |
| MCC    | 4.18  | 0.06   |
| MCCC1  | 2.528 | 11.23  |
| MCCC2  | 4.658 | 4.07   |
| MCCD1  | 2.127 | 0      |
| MCEE   | 0.822 | 1.84   |
| MCF2   | 3.654 | 0.04   |
| MCF2L  | 3.413 | 2.64   |
| MCF2L2 | 4.772 | 0.09   |

|          |        |       |
|----------|--------|-------|
| MCFD2    | 4.124  | 9.82  |
| MCHR1    | 2.423  | 0     |
| MCHR2    | 2.607  | 0     |
| MCL1     | 6.934  | 18.81 |
| MCM10    | 4.661  | 1.56  |
| MCM2     | 3.435  | 28.87 |
| MCM3     | 3.111  | 39.37 |
| MCM3AP   | 6.113  | 15.36 |
| MCM3APAS | 2.314  | 1.31  |
| MCM4     | 3.628  | 15.95 |
| MCM5     | 2.534  | 41.99 |
| MCM6     | 3.751  | 12.82 |
| MCM7     | 7.569  | 17.36 |
| MCM8     | 4.27   | 3.18  |
| MCMDC1   | 2.442  | 0.82  |
| MCOLN1   | 2.051  | 6.53  |
| MCOLN2   | 3.044  | 0.03  |
| MCOLN3   | 2.796  | 0     |
| MCPH1    | 2.518  | 4.51  |
| MCRS1    | 1.97   | 23.82 |
| MCTP1    | 3.057  | 0.16  |
| MCTP2    | 2.637  | 0.07  |
| MCTS1    | 0.926  | 15.83 |
| MDAC1    | 0.593  | 0     |
| MDC1     | 20.82  | 0.13  |
| MDFI     | 1.558  | 49.58 |
| MDFIC    | 9.2    | 2.01  |
| MDGA1    | 8.907  | 0.03  |
| MDH1     | 1.268  | 54.68 |
| MDH1B    | 2.332  | 0.11  |
| MDH2     | 2.612  | 41.63 |
| MDK      | 1.208  | 83.4  |
| MDM1     | 4.879  | 2.01  |
| MDM2     | 5.577  | 15.59 |
| MDM4     | 3.038  | 4.74  |
| MDN1     | 17.589 | 3.63  |
| MDP-1    | 0.683  | 10.61 |
| MDS032   | 0.843  | 29.08 |
| MDS1     | 1.286  | 0     |
| ME1      | 2.212  | 0     |
| ME2      | 2.717  | 12.86 |
| ME3      | 2.342  | 4.03  |
| MEA1     | 0.868  | 73.27 |
| MECP2    | 10.182 | 4.38  |
| MECR     | 2.744  | 5.95  |
| MED10    | 1.028  | 22.13 |
| MED11    | 0.83   | 16.85 |
| MED12    | 6.645  | 23.98 |
| MED12L   | 7.694  | 0.03  |
| MED18    | 1.831  | 2.81  |

|          |        |       |
|----------|--------|-------|
| MED19    | 1.515  | 6.23  |
| MED25    | 2.333  | 19.35 |
| MED28    | 1.831  | 29.67 |
| MED31    | 1.196  | 3.38  |
| MED4     | 2.022  | 12.87 |
| MED6     | 1.344  | 4.51  |
| MED8     | 3.496  | 5.42  |
| MED9     | 2.222  | 35.56 |
| MEF2A    | 5.126  | 32.53 |
| MEF2B    | 1.665  | 6.02  |
| MEF2C    | 5.877  | 76.79 |
| MEF2D    | 6.101  | 41.26 |
| MEFV     | 3.499  | 0.2   |
| MEG3     | 1.582  | 0     |
| MEGF10   | 7.524  | 0.03  |
| MEGF11   | 5.702  | 1.15  |
| MEGF6    | 6.852  | 18.19 |
| MEGF8    | 8.306  | 3.15  |
| MEGF9    | 6.297  | 3.66  |
| MEIG1    | 0.516  | 0.16  |
| MEIS1    | 3.181  | 0     |
| MEIS2    | 7.002  | 0.01  |
| MEIS3    | 2.764  | 0     |
| MEIS3P1  | 2.856  | 0.15  |
| MEIS3P2  | 1.888  | 0.04  |
| MELK     | 2.439  | 1.52  |
| MEMO1    | 0.1    | 64.86 |
| MEN1     | 4.617  | 16.78 |
| MEOX1    | 4.311  | 0     |
| MEOX2    | 4.743  | 0     |
| MEP1A    | 2.892  | 0     |
| MEP1B    | 2.308  | 0     |
| MEPE     | 1.964  | 0     |
| MERTK    | 3.626  | 0.25  |
| MESDC1   | 2.373  | 18.24 |
| MESDC2   | 4.243  | 11.95 |
| MESP1    | 1.162  | 0     |
| MESP2    | 1.614  | 0     |
| MEST     | 5.923  | 1.61  |
| MESTP1   | 2.452  | 0.51  |
| MET      | 13.244 | 0     |
| METAP1   | 2.328  | 10.71 |
| METAP2   | 1.91   | 30.92 |
| METRNL   | 1.092  | 6.32  |
| METRNL   | 1.333  | 23.32 |
| METT10D  | 3.674  | 6.74  |
| METT11D1 | 2.845  | 13.62 |
| METT5D1  | 3.957  | 1.37  |
| METTL1   | 2.574  | 4.25  |
| METTL2A  | 2.905  | 2.38  |

|           |        |       |
|-----------|--------|-------|
| METTL2B   | 4.364  | 1.26  |
| METTL3    | 1.955  | 21.16 |
| METTL4    | 3.65   | 1.22  |
| METTL5    | 0.939  | 14.71 |
| METTL6    | 0.994  | 2.46  |
| METTL7A   | 3.39   | 21.59 |
| METTL7B   | 1.417  | 2.02  |
| METTL8    | 2.246  | 2.07  |
| METTL9    | 3.138  | 21.55 |
| MFAP1     | 2.063  | 14.74 |
| MFAP2     | 1.142  | 0.07  |
| MFAP3     | 3.104  | 3.14  |
| MFAP3L    | 3.288  | 0.03  |
| MFAP4     | 1.813  | 0     |
| MFAP5     | 2.882  | 0.2   |
| MFGE8     | 1.934  | 5.06  |
| MFHAS1    | 5.229  | 19.06 |
| MFI2      | 3.222  | 5.2   |
| MFN1      | 3.519  | 2.28  |
| MFN2      | 4.539  | 27.69 |
| MFNG      | 2.034  | 42.53 |
| MFRP      | 2.519  | 0     |
| MFSD1     | 2.161  | 19.18 |
| MFSD11    | 2.526  | 5.11  |
| MFSD2     | 2.136  | 0.67  |
| MFSD3     | 1.446  | 12.41 |
| MFSD4     | 3.894  | 2.79  |
| MFSD5     | 1.76   | 13.26 |
| MFSD7     | 1.866  | 0.04  |
| MFSD8     | 1.893  | 0.89  |
| MFSD9     | 2.682  | 2.04  |
| MGA       | 12.535 | 3.21  |
| MGAM      | 12.969 | 0.09  |
| MGAT1     | 3.618  | 61.16 |
| MGAT2     | 3.012  | 10.01 |
| MGAT3     | 2.326  | 0.91  |
| MGAT4A    | 8.58   | 6.85  |
| MGAT4B    | 4.233  | 8.68  |
| MGAT4C    | 2.564  | 0     |
| MGAT5     | 5.083  | 1.16  |
| MGAT5B    | 4.555  | 1.4   |
| MGC102966 | 1.686  | 0     |
| MGC10334  | 2.193  | 9.99  |
| MGC10433  | 1.65   | 37.58 |
| MGC10646  | 2.179  | 0.2   |
| MGC10997  | 2.105  | 0.08  |
| MGC11102  | 2.836  | 6.48  |
| MGC11257  | 4.262  | 2.61  |
| MGC119295 | 2.442  | 0.03  |
| MGC12760  | 0.577  | 0.88  |

|           |        |        |
|-----------|--------|--------|
| MGC12965  | 2.128  | 1.58   |
| MGC12966  | 4.428  | 12.92  |
| MGC13005  | 1.652  | 0      |
| MGC13017  | 1.204  | 7.98   |
| MGC13057  | 0.692  | 0.48   |
| MGC13098  | 1.746  | 0.38   |
| MGC13114  | 1.677  | 24.52  |
| MGC13379  | 1.052  | 6.65   |
| MGC14327  | 1.557  | 18.07  |
| MGC14376  | 1.449  | 0.53   |
| MGC15523  | 5.035  | 24.86  |
| MGC157906 | 0.839  | 0      |
| MGC15885  | 2.698  | 0      |
| MGC16121  | 2.089  | 0.04   |
| MGC16169  | 3.31   | 5.65   |
| MGC16291  | 2.283  | 0      |
| MGC16385  | 2.742  | 2.91   |
| MGC16703  | 1.818  | 0.04   |
| MGC16824  | 3.55   | 10.27  |
| MGC17330  | 2.427  | 25.93  |
| MGC17403  | 0.657  | 1.92   |
| MGC19604  | 2.702  | 13.21  |
| MGC20983  | 2.122  | 0      |
| MGC21675  | 2.684  | 10.1   |
| MGC21874  | 7.226  | 2.38   |
| MGC22014  | 10.984 | 3.1    |
| MGC23985  | 0.506  | 0      |
| MGC24039  | 6.722  | 0.83   |
| MGC2408   | 0.986  | 7      |
| MGC24975  | 1.64   | 0.67   |
| MGC26356  | 2.553  | 0.2    |
| MGC26597  | 4.24   | 0.32   |
| MGC26647  | 2.036  | 0      |
| MGC26718  | 2.079  | 0      |
| MGC26733  | 4.844  | 0      |
| MGC26963  | 2.127  | 0.08   |
| MGC27016  | 2.448  | 0      |
| MGC27121  | 1.644  | 0      |
| MGC27348  | 14.487 | 0.28   |
| MGC2752   | 3.073  | 7.37   |
| MGC29506  | 0.988  | 481.45 |
| MGC29671  | 1.893  | 3.29   |
| MGC29891  | 3.357  | 1.23   |
| MGC3032   | 5.415  | 5.73   |
| MGC3196   | 0.609  | 11.9   |
| MGC3207   | 3.389  | 11.39  |
| MGC33212  | 0.651  | 5.82   |
| MGC33407  | 1.42   | 0      |
| MGC33556  | 2.485  | 127.43 |
| MGC33657  | 2.948  | 0      |

|          |       |      |
|----------|-------|------|
| MGC33846 | 1.861 | 0    |
| MGC33894 | 0.915 | 0.46 |
| MGC34646 | 3.467 | 0.03 |
| MGC34761 | 1.97  | 0    |
| MGC34774 | 3.59  | 0    |
| MGC34796 | 2.055 | 0    |
| MGC34800 | 2.502 | 0    |
| MGC34821 | 1.663 | 0    |
| MGC34824 | 1.757 | 0    |
| MGC34829 | 2.949 | 1.28 |
| MGC35154 | 1.383 | 0    |
| MGC35295 | 1.536 | 0.05 |
| MGC35308 | 2.704 | 0    |
| MGC35361 | 4.434 | 0.46 |
| MGC35402 | 2.334 | 0.76 |
| MGC35440 | 2.209 | 0.31 |
| MGC39545 | 0.71  | 0    |
| MGC39584 | 0.586 | 0    |
| MGC39606 | 2.921 | 0    |
| MGC39715 | 2.444 | 0    |
| MGC39900 | 1.636 | 1.13 |
| MGC40405 | 5.382 | 0.28 |
| MGC40489 | 2.625 | 6.39 |
| MGC40499 | 2.94  | 5.22 |
| MGC40574 | 1.65  | 0.15 |
| MGC4093  | 0.986 | 5.29 |
| MGC4172  | 1.484 | 5.23 |
| MGC42090 | 7.952 | 0    |
| MGC42105 | 2.313 | 0.03 |
| MGC42157 | 1.046 | 0.24 |
| MGC42367 | 4.031 | 3.91 |
| MGC4294  | 0.968 | 0    |
| MGC44328 | 0.727 | 0    |
| MGC45134 | 1.627 | 6.47 |
| MGC45438 | 1.828 | 0.04 |
| MGC45491 | 2.464 | 0.03 |
| MGC45713 | 0.959 | 0    |
| MGC45800 | 1.761 | 0    |
| MGC46336 | 1.765 | 0.09 |
| MGC46496 | 1.644 | 0    |
| MGC4655  | 2.694 | 2.78 |
| MGC4677  | 0.491 | 4.29 |
| MGC48628 | 3.927 | 0    |
| MGC50273 | 1.325 | 0.06 |
| MGC50559 | 2.055 | 0.33 |
| MGC50811 | 1.323 | 0.19 |
| MGC51025 | 1.616 | 0    |
| MGC5139  | 4.811 | 7.11 |
| MGC52110 | 1.662 | 8.26 |
| MGC52282 | 0.692 | 0    |



|          |        |        |
|----------|--------|--------|
| MGC52498 | 1.992  | 0.47   |
| MGC57346 | 1.879  | 4.71   |
| MGC59937 | 0.74   | 0      |
| MGC61571 | 0.626  | 10.63  |
| MGC61598 | 1.77   | 0.09   |
| MGC7036  | 1.435  | 46.08  |
| MGC70857 | 1.932  | 2.66   |
| MGC70863 | 1.665  | 2.88   |
| MGC70870 | 2.144  | 0      |
| MGC70924 | 1.53   | 0.55   |
| MGC71993 | 0.582  | 152.84 |
| MGC72080 | 12.869 | 0.19   |
| MGC72104 | 0.873  | 10.03  |
| MGC87042 | 2.384  | 0.53   |
| MGC87315 | 6.66   | 0.77   |
| MGC87631 | 2.806  | 0      |
| MGC87895 | 0.838  | 391.93 |
| MGC88374 | 1.132  | 0      |
| MGC9712  | 8.99   | 0      |
| MGC99813 | 2.218  | 0.03   |
| MGEA5    | 5.146  | 20.82  |
| MGLL     | 4.884  | 2.48   |
| MGMT     | 0.864  | 84.92  |
| MGP      | 0.661  | 1.02   |
| MGRN1    | 3.904  | 20.97  |
| MGST1    | 1.507  | 0      |
| MGST2    | 0.801  | 42.69  |
| MGST3    | 0.663  | 1.39   |
| MIA      | 0.537  | 0.47   |
| MIA2     | 2.281  | 0      |
| MIA3     | 11.975 | 5.27   |
| MIB1     | 9.308  | 1.67   |
| MIB2     | 3.244  | 13.35  |
| MICA     | 4.103  | 0.43   |
| MICAL1   | 4.147  | 64.25  |
| MICAL2   | 3.906  | 0.08   |
| MICAL3   | 6.515  | 6.72   |
| MICALCL  | 2.362  | 0      |
| MICALL1  | 4.195  | 21.08  |
| MICALL2  | 8.01   | 0.31   |
| MICB     | 7.106  | 0.12   |
| MICC     | 13.868 | 0      |
| MICD     | 5.374  | 0      |
| MICE     | 7.449  | 0      |
| MICF     | 0.3    | 0      |
| MICG     | 0.909  | 0      |
| MID1     | 6.181  | 0.08   |
| MID1IP1  | 2.358  | 26.5   |
| MID2     | 2.667  | 0.06   |
| MIDN     | 3.793  | 13.77  |

|           |       |        |
|-----------|-------|--------|
| MIER1     | 4.972 | 1.84   |
| MIER2     | 2.762 | 5.91   |
| MIER3     | 5.201 | 2.01   |
| MIF       | 0.561 | 513.98 |
| MIF4GD    | 1.412 | 10.74  |
| MINA      | 2.494 | 8.48   |
| MINK1     | 4.971 | 9.59   |
| MINPP1    | 2.394 | 2.32   |
| MIOX      | 1.437 | 0      |
| MIP       | 2.004 | 0      |
| MIPEP     | 2.375 | 2.41   |
| MIPOL1    | 6.082 | 0.11   |
| MIR16     | 2.937 | 11.25  |
| MIRN100   | 0.1   | 0      |
| MIRN101-1 | 0.1   | 0      |
| MIRN101-2 | 0.1   | 0      |
| MIRN103-1 | 0.1   | 0      |
| MIRN103-2 | 0.1   | 0      |
| MIRN105-1 | 0.1   | 0      |
| MIRN105-2 | 0.1   | 0      |
| MIRN106A  | 0.1   | 0      |
| MIRN106B  | 0.1   | 0      |
| MIRN107   | 0.1   | 0      |
| MIRN10A   | 0.1   | 0      |
| MIRN10B   | 0.1   | 0      |
| MIRN1-1   | 0.1   | 0      |
| MIRN1-2   | 0.1   | 0      |
| MIRN122A  | 0.1   | 0      |
| MIRN124A1 | 0.1   | 0      |
| MIRN124A2 | 0.1   | 0      |
| MIRN124A3 | 0.1   | 0      |
| MIRN125A  | 0.1   | 0      |
| MIRN125B1 | 0.1   | 0      |
| MIRN125B2 | 0.1   | 0      |
| MIRN126   | 0.1   | 0      |
| MIRN127   | 0.1   | 0      |
| MIRN128A  | 0.1   | 0      |
| MIRN128B  | 0.1   | 0      |
| MIRN129-1 | 0.1   | 0      |
| MIRN129-2 | 0.1   | 0      |
| MIRN130A  | 0.1   | 0      |
| MIRN130B  | 0.1   | 0      |
| MIRN132   | 0.1   | 0      |
| MIRN133A1 | 0.1   | 0      |
| MIRN133A2 | 0.1   | 0      |
| MIRN133B  | 0.1   | 0      |
| MIRN134   | 0.1   | 0      |
| MIRN135A1 | 0.1   | 0      |
| MIRN135A2 | 0.1   | 0      |
| MIRN135B  | 0.1   | 0      |

|           |       |       |
|-----------|-------|-------|
| MIRN136   | 0.1   | 0     |
| MIRN137   | 0.1   | 0     |
| MIRN138-1 | 0.1   | 0     |
| MIRN138-2 | 0.1   | 0     |
| MIRN139   | 0.1   | 0     |
| MIRN140   | 0.1   | 0     |
| MIRN141   | 0.1   | 0     |
| MIRN142   | 0.856 | 39.75 |
| MIRN143   | 0.1   | 0     |
| MIRN144   | 0.1   | 0     |
| MIRN145   | 0.1   | 0     |
| MIRN146A  | 0.1   | 0     |
| MIRN146B  | 0.1   | 0     |
| MIRN147   | 0.1   | 0     |
| MIRN148A  | 0.1   | 0     |
| MIRN148B  | 0.1   | 0     |
| MIRN149   | 0.1   | 0     |
| MIRN150   | 0.1   | 0     |
| MIRN151   | 0.1   | 0     |
| MIRN153-1 | 0.1   | 0     |
| MIRN153-2 | 0.1   | 0     |
| MIRN154   | 0.1   | 0     |
| MIRN155   | 0.1   | 0     |
| MIRN15A   | 0.1   | 0     |
| MIRN15B   | 0.1   | 0     |
| MIRN16-1  | 0.1   | 0     |
| MIRN16-2  | 0.1   | 0     |
| MIRN17    | 0.1   | 0     |
| MIRN181A1 | 0.1   | 0     |
| MIRN181A2 | 0.1   | 0     |
| MIRN181B1 | 0.1   | 0     |
| MIRN181B2 | 0.1   | 0     |
| MIRN181C  | 0.1   | 0     |
| MIRN181D  | 0.1   | 0     |
| MIRN182   | 0.1   | 0     |
| MIRN183   | 0.1   | 0     |
| MIRN184   | 0.1   | 0     |
| MIRN185   | 0.1   | 0     |
| MIRN186   | 0.1   | 0     |
| MIRN187   | 0.1   | 0     |
| MIRN188   | 0.1   | 0     |
| MIRN18A   | 0.1   | 0     |
| MIRN18B   | 0.1   | 0     |
| MIRN190   | 0.1   | 0     |
| MIRN191   | 0.1   | 0     |
| MIRN192   | 0.1   | 0     |
| MIRN193A  | 0.1   | 0     |
| MIRN193B  | 0.1   | 0     |
| MIRN194-1 | 0.1   | 0     |
| MIRN194-2 | 0.1   | 0     |

|           |     |   |
|-----------|-----|---|
| MIRN195   | 0.1 | 0 |
| MIRN196A1 | 0.1 | 0 |
| MIRN196A2 | 0.1 | 0 |
| MIRN196B  | 0.1 | 0 |
| MIRN197   | 0.1 | 0 |
| MIRN198   | 0.1 | 0 |
| MIRN199A1 | 0.1 | 0 |
| MIRN199A2 | 0.1 | 0 |
| MIRN199B  | 0.1 | 0 |
| MIRN19A   | 0.1 | 0 |
| MIRN19B1  | 0.1 | 0 |
| MIRN19B2  | 0.1 | 0 |
| MIRN200A  | 0.1 | 0 |
| MIRN200B  | 0.1 | 0 |
| MIRN200C  | 0.1 | 0 |
| MIRN202   | 0.1 | 0 |
| MIRN203   | 0.1 | 0 |
| MIRN204   | 0.1 | 0 |
| MIRN205   | 0.1 | 0 |
| MIRN206   | 0.1 | 0 |
| MIRN208   | 0.1 | 0 |
| MIRN20A   | 0.1 | 0 |
| MIRN20B   | 0.1 | 0 |
| MIRN21    | 0.1 | 0 |
| MIRN210   | 0.1 | 0 |
| MIRN211   | 0.1 | 0 |
| MIRN212   | 0.1 | 0 |
| MIRN214   | 0.1 | 0 |
| MIRN215   | 0.1 | 0 |
| MIRN216   | 0.1 | 0 |
| MIRN217   | 0.1 | 0 |
| MIRN218-1 | 0.1 | 0 |
| MIRN218-2 | 0.1 | 0 |
| MIRN219-1 | 0.1 | 0 |
| MIRN219-2 | 0.1 | 0 |
| MIRN22    | 0.1 | 0 |
| MIRN220   | 0.1 | 0 |
| MIRN221   | 0.1 | 0 |
| MIRN222   | 0.1 | 0 |
| MIRN223   | 0.1 | 0 |
| MIRN224   | 0.1 | 0 |
| MIRN23A   | 0.1 | 0 |
| MIRN23B   | 0.1 | 0 |
| MIRN24-1  | 0.1 | 0 |
| MIRN24-2  | 0.1 | 0 |
| MIRN25    | 0.1 | 0 |
| MIRN26A1  | 0.1 | 0 |
| MIRN26A2  | 0.1 | 0 |
| MIRN26B   | 0.1 | 0 |
| MIRN27A   | 0.1 | 0 |

|           |     |   |
|-----------|-----|---|
| MIRN27B   | 0.1 | 0 |
| MIRN28    | 0.1 | 0 |
| MIRN299   | 0.1 | 0 |
| MIRN29A   | 0.1 | 0 |
| MIRN29B1  | 0.1 | 0 |
| MIRN29B2  | 0.1 | 0 |
| MIRN29C   | 0.1 | 0 |
| MIRN301   | 0.1 | 0 |
| MIRN302A  | 0.1 | 0 |
| MIRN302B  | 0.1 | 0 |
| MIRN302C  | 0.1 | 0 |
| MIRN302D  | 0.1 | 0 |
| MIRN30A   | 0.1 | 0 |
| MIRN30B   | 0.1 | 0 |
| MIRN30C1  | 0.1 | 0 |
| MIRN30C2  | 0.1 | 0 |
| MIRN30D   | 0.1 | 0 |
| MIRN30E   | 0.1 | 0 |
| MIRN31    | 0.1 | 0 |
| MIRN32    | 0.1 | 0 |
| MIRN320   | 0.1 | 0 |
| MIRN323   | 0.1 | 0 |
| MIRN324   | 0.1 | 0 |
| MIRN325   | 0.1 | 0 |
| MIRN326   | 0.1 | 0 |
| MIRN329-1 | 0.1 | 0 |
| MIRN329-2 | 0.1 | 0 |
| MIRN33    | 0.1 | 0 |
| MIRN330   | 0.1 | 0 |
| MIRN331   | 0.1 | 0 |
| MIRN335   | 0.1 | 0 |
| MIRN337   | 0.1 | 0 |
| MIRN338   | 0.1 | 0 |
| MIRN339   | 0.1 | 0 |
| MIRN33B   | 0.1 | 0 |
| MIRN340   | 0.1 | 0 |
| MIRN342   | 0.1 | 0 |
| MIRN345   | 0.1 | 0 |
| MIRN346   | 0.1 | 0 |
| MIRN34A   | 0.1 | 0 |
| MIRN34B   | 0.1 | 0 |
| MIRN34C   | 0.1 | 0 |
| MIRN361   | 0.1 | 0 |
| MIRN362   | 0.1 | 0 |
| MIRN363   | 0.1 | 0 |
| MIRN367   | 0.1 | 0 |
| MIRN368   | 0.1 | 0 |
| MIRN369   | 0.1 | 0 |
| MIRN370   | 0.1 | 0 |
| MIRN371   | 0.1 | 0 |

|           |     |   |
|-----------|-----|---|
| MIRN372   | 0.1 | 0 |
| MIRN373   | 0.1 | 0 |
| MIRN374   | 0.1 | 0 |
| MIRN375   | 0.1 | 0 |
| MIRN376A1 | 0.1 | 0 |
| MIRN376A2 | 0.1 | 0 |
| MIRN376B  | 0.1 | 0 |
| MIRN377   | 0.1 | 0 |
| MIRN378   | 0.1 | 0 |
| MIRN379   | 0.1 | 0 |
| MIRN380   | 0.1 | 0 |
| MIRN381   | 0.1 | 0 |
| MIRN382   | 0.1 | 0 |
| MIRN383   | 0.1 | 0 |
| MIRN384   | 0.1 | 0 |
| MIRN409   | 0.1 | 0 |
| MIRN410   | 0.1 | 0 |
| MIRN411   | 0.1 | 0 |
| MIRN412   | 0.1 | 0 |
| MIRN421   | 0.1 | 0 |
| MIRN422A  | 0.1 | 0 |
| MIRN423   | 0.1 | 0 |
| MIRN424   | 0.1 | 0 |
| MIRN425   | 0.1 | 0 |
| MIRN429   | 0.1 | 0 |
| MIRN431   | 0.1 | 0 |
| MIRN432   | 0.1 | 0 |
| MIRN433   | 0.1 | 0 |
| MIRN448   | 0.1 | 0 |
| MIRN449   | 0.1 | 0 |
| MIRN449B  | 0.1 | 0 |
| MIRN450-1 | 0.1 | 0 |
| MIRN450-2 | 0.1 | 0 |
| MIRN451   | 0.1 | 0 |
| MIRN452   | 0.1 | 0 |
| MIRN453   | 0.1 | 0 |
| MIRN455   | 0.1 | 0 |
| MIRN483   | 0.1 | 0 |
| MIRN484   | 0.1 | 0 |
| MIRN485   | 0.1 | 0 |
| MIRN486   | 0.1 | 0 |
| MIRN487A  | 0.1 | 0 |
| MIRN487B  | 0.1 | 0 |
| MIRN488   | 0.1 | 0 |
| MIRN489   | 0.1 | 0 |
| MIRN490   | 0.1 | 0 |
| MIRN491   | 0.1 | 0 |
| MIRN492   | 0.1 | 0 |
| MIRN493   | 0.1 | 0 |
| MIRN494   | 0.1 | 0 |

|           |     |   |
|-----------|-----|---|
| MIRN495   | 0.1 | 0 |
| MIRN496   | 0.1 | 0 |
| MIRN497   | 0.1 | 0 |
| MIRN498   | 0.1 | 0 |
| MIRN499   | 0.1 | 0 |
| MIRN500   | 0.1 | 0 |
| MIRN501   | 0.1 | 0 |
| MIRN502   | 0.1 | 0 |
| MIRN503   | 0.1 | 0 |
| MIRN504   | 0.1 | 0 |
| MIRN505   | 0.1 | 0 |
| MIRN506   | 0.1 | 0 |
| MIRN507   | 0.1 | 0 |
| MIRN508   | 0.1 | 0 |
| MIRN509   | 0.1 | 0 |
| MIRN510   | 0.1 | 0 |
| MIRN512-1 | 0.1 | 0 |
| MIRN512-2 | 0.1 | 0 |
| MIRN513-1 | 0.1 | 0 |
| MIRN513-2 | 0.1 | 0 |
| MIRN514-1 | 0.1 | 0 |
| MIRN514-2 | 0.1 | 0 |
| MIRN514-3 | 0.1 | 0 |
| MIRN515-1 | 0.1 | 0 |
| MIRN515-2 | 0.1 | 0 |
| MIRN516-1 | 0.1 | 0 |
| MIRN516-2 | 0.1 | 0 |
| MIRN516-3 | 0.1 | 0 |
| MIRN516-4 | 0.1 | 0 |
| MIRN517A  | 0.1 | 0 |
| MIRN517B  | 0.1 | 0 |
| MIRN517C  | 0.1 | 0 |
| MIRN518A1 | 0.1 | 0 |
| MIRN518A2 | 0.1 | 0 |
| MIRN518B  | 0.1 | 0 |
| MIRN518C  | 0.1 | 0 |
| MIRN518D  | 0.1 | 0 |
| MIRN518E  | 0.1 | 0 |
| MIRN518F  | 0.1 | 0 |
| MIRN519A1 | 0.1 | 0 |
| MIRN519A2 | 0.1 | 0 |
| MIRN519B  | 0.1 | 0 |
| MIRN519C  | 0.1 | 0 |
| MIRN519D  | 0.1 | 0 |
| MIRN519E  | 0.1 | 0 |
| MIRN520A  | 0.1 | 0 |
| MIRN520B  | 0.1 | 0 |
| MIRN520C  | 0.1 | 0 |
| MIRN520D  | 0.1 | 0 |
| MIRN520E  | 0.1 | 0 |

|           |     |   |
|-----------|-----|---|
| MIRN520F  | 0.1 | 0 |
| MIRN520G  | 0.1 | 0 |
| MIRN520H  | 0.1 | 0 |
| MIRN521-1 | 0.1 | 0 |
| MIRN521-2 | 0.1 | 0 |
| MIRN522   | 0.1 | 0 |
| MIRN523   | 0.1 | 0 |
| MIRN524   | 0.1 | 0 |
| MIRN526A1 | 0.1 | 0 |
| MIRN526A2 | 0.1 | 0 |
| MIRN526B  | 0.1 | 0 |
| MIRN527   | 0.1 | 0 |
| MIRN532   | 0.1 | 0 |
| MIRN539   | 0.1 | 0 |
| MIRN542   | 0.1 | 0 |
| MIRN544   | 0.1 | 0 |
| MIRN545   | 0.1 | 0 |
| MIRN548A1 | 0.1 | 0 |
| MIRN548A2 | 0.1 | 0 |
| MIRN548A3 | 0.1 | 0 |
| MIRN548B  | 0.1 | 0 |
| MIRN548C  | 0.1 | 0 |
| MIRN548D1 | 0.1 | 0 |
| MIRN548D2 | 0.1 | 0 |
| MIRN549   | 0.1 | 0 |
| MIRN550-1 | 0.1 | 0 |
| MIRN550-2 | 0.1 | 0 |
| MIRN551A  | 0.1 | 0 |
| MIRN551B  | 0.1 | 0 |
| MIRN552   | 0.1 | 0 |
| MIRN553   | 0.1 | 0 |
| MIRN554   | 0.1 | 0 |
| MIRN555   | 0.1 | 0 |
| MIRN556   | 0.1 | 0 |
| MIRN557   | 0.1 | 0 |
| MIRN559   | 0.1 | 0 |
| MIRN560   | 0.1 | 0 |
| MIRN561   | 0.1 | 0 |
| MIRN562   | 0.1 | 0 |
| MIRN563   | 0.1 | 0 |
| MIRN564   | 0.1 | 0 |
| MIRN565   | 0.1 | 0 |
| MIRN566   | 0.1 | 0 |
| MIRN569   | 0.1 | 0 |
| MIRN570   | 0.1 | 0 |
| MIRN571   | 0.1 | 0 |
| MIRN572   | 0.1 | 0 |
| MIRN573   | 0.1 | 0 |
| MIRN575   | 0.1 | 0 |
| MIRN576   | 0.1 | 0 |



|         |     |   |
|---------|-----|---|
| MIRN577 | 0.1 | 0 |
| MIRN578 | 0.1 | 0 |
| MIRN579 | 0.1 | 0 |
| MIRN580 | 0.1 | 0 |
| MIRN581 | 0.1 | 0 |
| MIRN582 | 0.1 | 0 |
| MIRN583 | 0.1 | 0 |
| MIRN584 | 0.1 | 0 |
| MIRN585 | 0.1 | 0 |
| MIRN586 | 0.1 | 0 |
| MIRN587 | 0.1 | 0 |
| MIRN588 | 0.1 | 0 |
| MIRN589 | 0.1 | 0 |
| MIRN590 | 0.1 | 0 |
| MIRN591 | 0.1 | 0 |
| MIRN592 | 0.1 | 0 |
| MIRN593 | 0.1 | 0 |
| MIRN594 | 0.1 | 0 |
| MIRN595 | 0.1 | 0 |
| MIRN596 | 0.1 | 0 |
| MIRN597 | 0.1 | 0 |
| MIRN598 | 0.1 | 0 |
| MIRN599 | 0.1 | 0 |
| MIRN600 | 0.1 | 0 |
| MIRN601 | 0.1 | 0 |
| MIRN602 | 0.1 | 0 |
| MIRN603 | 0.1 | 0 |
| MIRN604 | 0.1 | 0 |
| MIRN605 | 0.1 | 0 |
| MIRN606 | 0.1 | 0 |
| MIRN607 | 0.1 | 0 |
| MIRN608 | 0.1 | 0 |
| MIRN609 | 0.1 | 0 |
| MIRN610 | 0.1 | 0 |
| MIRN611 | 0.1 | 0 |
| MIRN612 | 0.1 | 0 |
| MIRN613 | 0.1 | 0 |
| MIRN614 | 0.1 | 0 |
| MIRN616 | 0.1 | 0 |
| MIRN617 | 0.1 | 0 |
| MIRN618 | 0.1 | 0 |
| MIRN619 | 0.1 | 0 |
| MIRN621 | 0.1 | 0 |
| MIRN622 | 0.1 | 0 |
| MIRN623 | 0.1 | 0 |
| MIRN624 | 0.1 | 0 |
| MIRN625 | 0.1 | 0 |
| MIRN626 | 0.1 | 0 |
| MIRN627 | 0.1 | 0 |
| MIRN628 | 0.1 | 0 |

|            |     |   |
|------------|-----|---|
| MIRN629    | 0.1 | 0 |
| MIRN630    | 0.1 | 0 |
| MIRN631    | 0.1 | 0 |
| MIRN632    | 0.1 | 0 |
| MIRN633    | 0.1 | 0 |
| MIRN634    | 0.1 | 0 |
| MIRN635    | 0.1 | 0 |
| MIRN636    | 0.1 | 0 |
| MIRN637    | 0.1 | 0 |
| MIRN639    | 0.1 | 0 |
| MIRN640    | 0.1 | 0 |
| MIRN641    | 0.1 | 0 |
| MIRN642    | 0.1 | 0 |
| MIRN643    | 0.1 | 0 |
| MIRN645    | 0.1 | 0 |
| MIRN646    | 0.1 | 0 |
| MIRN647    | 0.1 | 0 |
| MIRN648    | 0.1 | 0 |
| MIRN649    | 0.1 | 0 |
| MIRN650    | 0.1 | 0 |
| MIRN651    | 0.1 | 0 |
| MIRN652    | 0.1 | 0 |
| MIRN653    | 0.1 | 0 |
| MIRN654    | 0.1 | 0 |
| MIRN655    | 0.1 | 0 |
| MIRN656    | 0.1 | 0 |
| MIRN657    | 0.1 | 0 |
| MIRN658    | 0.1 | 0 |
| MIRN659    | 0.1 | 0 |
| MIRN660    | 0.1 | 0 |
| MIRN661    | 0.1 | 0 |
| MIRN662    | 0.1 | 0 |
| MIRN663    | 0.1 | 0 |
| MIRN7-1    | 0.1 | 0 |
| MIRN7-2    | 0.1 | 0 |
| MIRN7-3    | 0.1 | 0 |
| MIRN9-1    | 0.1 | 0 |
| MIRN9-2    | 0.1 | 0 |
| MIRN92-1   | 0.1 | 0 |
| MIRN92-2   | 0.1 | 0 |
| MIRN93     | 0.1 | 0 |
| MIRN9-3    | 0.1 | 0 |
| MIRN95     | 0.1 | 0 |
| MIRN96     | 0.1 | 0 |
| MIRN98     | 0.1 | 0 |
| MIRN99A    | 0.1 | 0 |
| MIRN99B    | 0.1 | 0 |
| MIRNLET7A1 | 0.1 | 0 |
| MIRNLET7A2 | 0.1 | 0 |
| MIRNLET7A3 | 0.1 | 0 |

|            |        |       |
|------------|--------|-------|
| MIRNLET7B  | 0.1    | 0     |
| MIRNLET7C  | 0.1    | 0     |
| MIRNLET7D  | 0.1    | 0     |
| MIRNLET7E  | 0.1    | 0     |
| MIRNLET7F1 | 0.1    | 0     |
| MIRNLET7F2 | 0.1    | 0     |
| MIRNLET7G  | 0.1    | 0     |
| MIRNLET7I  | 0.1    | 0     |
| MIS12      | 2.502  | 4.44  |
| MIST       | 1.782  | 0     |
| MITD1      | 0.91   | 10.46 |
| MITF       | 5.463  | 0.08  |
| MIXL1      | 0.699  | 0     |
| MIZF       | 2.3    | 10.03 |
| MKI67      | 12.497 | 22.69 |
| MKI67IP    | 1.67   | 14.47 |
| MKKS       | 2.774  | 8.38  |
| MKL1       | 4.49   | 13.79 |
| MKL2       | 8.634  | 1.84  |
| MKLN1      | 22.274 | 0.99  |
| MKNK1      | 2.946  | 10.9  |
| MKNK2      | 4.134  | 51.82 |
| MKRN1      | 6.146  | 9.51  |
| MKRN2      | 2.767  | 9.08  |
| MKRN3      | 3.107  | 0     |
| MKRN4      | 3.669  | 0.28  |
| MKRNP1     | 3.747  | 0.54  |
| MKRNP2     | 3.656  | 0     |
| MKRNP3     | 1.262  | 0     |
| MKS1       | 2.397  | 6.12  |
| MKX        | 3.605  | 0     |
| MLANA      | 1.524  | 0     |
| MLC1       | 4.174  | 15.82 |
| MLCK       | 2.74   | 0     |
| MLF1       | 1.105  | 0.15  |
| MLF1IP     | 2.533  | 6.32  |
| MLF2       | 1.517  | 75.13 |
| MLH1       | 2.524  | 11.25 |
| MLH3       | 7.896  | 1.81  |
| MLKL       | 2.498  | 11.63 |
| MLL        | 15.258 | 2.98  |
| MLL2       | 17.007 | 6.18  |
| MLL3       | 35.348 | 1.43  |
| MLL4       | 8.468  | 7.84  |
| MLL5       | 15.047 | 6.99  |
| MLLT1      | 5.405  | 12.03 |
| MLLT10     | 5.121  | 7.14  |
| MLLT11     | 2.158  | 4.56  |
| MLLT3      | 3.375  | 0.05  |
| MLLT4      | 11.573 | 6.46  |

|        |       |       |
|--------|-------|-------|
| MLLT6  | 6.897 | 38.05 |
| MLLT7  | 3.137 | 7.6   |
| MLN    | 0.58  | 0     |
| MLNR   | 1.239 | 0.14  |
| MLPH   | 2.38  | 0.03  |
| MLSTD1 | 2.486 | 8.57  |
| MLSTD2 | 5.21  | 1.69  |
| MLX    | 2.604 | 14.14 |
| MLXIP  | 7.38  | 41.63 |
| MLXIPL | 6.926 | 0.41  |
| MLYCD  | 2.142 | 1.69  |
| MLZE   | 2.714 | 0.03  |
| MMAA   | 1.473 | 3.03  |
| MMAB   | 2.348 | 6.02  |
| MMACHC | 2.227 | 3.41  |
| MMD    | 2.723 | 3.03  |
| MMD2   | 4.67  | 0.02  |
| MME    | 5.998 | 72.76 |
| MMEL1  | 2.85  | 0.24  |
| MMP1   | 1.973 | 0     |
| MMP10  | 1.743 | 0     |
| MMP11  | 2.261 | 14.68 |
| MMP12  | 1.824 | 0     |
| MMP13  | 2.715 | 0     |
| MMP14  | 3.538 | 19.38 |
| MMP15  | 4.438 | 1.88  |
| MMP16  | 6.623 | 0     |
| MMP17  | 2.681 | 75.5  |
| MMP19  | 5.445 | 0.85  |
| MMP2   | 3.536 | 0.09  |
| MMP20  | 1.956 | 0     |
| MMP21  | 1.919 | 0.04  |
| MMP23A | 5.465 | 1.09  |
| MMP23B | 1.565 | 0.75  |
| MMP24  | 4.182 | 2.32  |
| MMP25  | 4.722 | 3.05  |
| MMP26  | 0.991 | 0     |
| MMP27  | 1.647 | 0     |
| MMP28  | 3.035 | 3.31  |
| MMP3   | 1.828 | 0     |
| MMP7   | 1.119 | 0     |
| MMP8   | 2.225 | 5.72  |
| MMP9   | 2.548 | 9.88  |
| MMRN1  | 4.969 | 7.38  |
| MMRN2  | 3.828 | 0.15  |
| MMS19L | 3.485 | 18.18 |
| MN1    | 7.556 | 0.08  |
| MNAT1  | 1.372 | 3.87  |
| MND1   | 0.941 | 8.68  |
| MNDA   | 1.667 | 1.87  |

|          |        |       |
|----------|--------|-------|
| MNS1     | 1.945  | 0.6   |
| MNT      | 4.842  | 6.63  |
| MOAP1    | 2.618  | 10.45 |
| MOBK1B   | 3.709  | 23.03 |
| MOBK1A   | 6.958  | 1.1   |
| MOBK2A   | 3.331  | 82.97 |
| MOBK2B   | 6.525  | 1.05  |
| MOBK2C   | 3.392  | 4.69  |
| MOBP     | 2.588  | 0     |
| MOCOS    | 2.724  | 0.03  |
| MOCS1    | 4.541  | 0.02  |
| MOCS2    | 2.329  | 8.61  |
| MOCS3    | 2.458  | 1.95  |
| MOCS3P   | 1.638  | 0     |
| MOG      | 16.242 | 0     |
| MOGAT1   | 1.093  | 0     |
| MOGAT2   | 1.005  | 0     |
| MOGAT3   | 2.82   | 0     |
| MON1A    | 2.038  | 6.45  |
| MON1B    | 3.582  | 8.46  |
| MON2     | 6.071  | 2.9   |
| MORC1    | 3.743  | 0.03  |
| MORC2    | 4.467  | 8.56  |
| MORC3    | 4.227  | 4.24  |
| MORC4    | 3.041  | 1.19  |
| MORF4    | 0.708  | 0.48  |
| MORF4L1  | 1.943  | 41.4  |
| MORF4L2  | 1.828  | 43.04 |
| MORF4LP1 | 1.795  | 38.71 |
| MORF4LP3 | 2.435  | 0.17  |
| MORF4LP4 | 2.009  | 0.13  |
| MORG1    | 1.129  | 16.72 |
| MORN1    | 1.641  | 0.72  |
| MORN2    | 0.681  | 1.73  |
| MORN3    | 1.158  | 0.22  |
| MOS      | 1.041  | 0     |
| MOSC1    | 2      | 0.25  |
| MOSC2    | 1.576  | 0.11  |
| MOSPD1   | 2.358  | 2.61  |
| MOSPD2   | 3.171  | 0.82  |
| MOSPD3   | 3.322  | 5.3   |
| MOV10    | 3.312  | 15.87 |
| MOV10L1  | 3.898  | 0     |
| MOXD1    | 2.166  | 0.04  |
| MPDU1    | 1.695  | 37.32 |
| MPDZ     | 6.564  | 0     |
| MPEG1    | 8.313  | 0.49  |
| MPFL     | 3.162  | 0     |
| MPG      | 2.156  | 33.84 |
| MPHOSPH1 | 6.31   | 1.41  |

|           |        |       |
|-----------|--------|-------|
| MPHOSPH10 | 2.483  | 8.04  |
| MPHOSPH6  | 1.08   | 8.5   |
| MPHOSPH9  | 3.611  | 4.1   |
| MPI       | 1.771  | 36.81 |
| MPL       | 3.645  | 0.58  |
| MPN2      | 1.243  | 0     |
| MPND      | 1.513  | 13.09 |
| MPO       | 3.215  | 45.64 |
| MPP1      | 2      | 42.54 |
| MPP2      | 4.412  | 0.63  |
| MPP3      | 2.996  | 0.71  |
| MPP4      | 2.435  | 0     |
| MPP5      | 5.357  | 0.94  |
| MPP6      | 4.998  | 5.71  |
| MPP7      | 2.092  | 0.04  |
| MPPE1     | 2.806  | 4.98  |
| MPPED1    | 1.537  | 0     |
| MPPED2    | 2.249  | 0.03  |
| MPST      | 1.728  | 18.62 |
| MPV17     | 0.998  | 50.81 |
| MPV17L    | 2.213  | 0.76  |
| MPZ       | 1.944  | 0.95  |
| MPZL1     | 6.897  | 6.53  |
| MR1       | 1.263  | 5.54  |
| MRAP      | 1.721  | 4.6   |
| MRAS      | 3.91   | 0.07  |
| MRC1      | 5.171  | 12.12 |
| MRC1L1    | 5.171  | 49.79 |
| MRC2      | 4.693  | 0.09  |
| MRCL3     | 1.229  | 104.8 |
| MRE11A    | 5.332  | 2.56  |
| MRE11B    | 1.65   | 0.46  |
| MREG      | 1.533  | 0     |
| MRFAP1    | 1.534  | 75.17 |
| MRFAP1L1  | 3.333  | 11.07 |
| MRGPRD    | 0.966  | 0     |
| MRGPRE    | 1.02   | 0     |
| MRGPRF    | 2.152  | 0     |
| MRGPRG    | 0.87   | 0     |
| MRGPRX1   | 1.207  | 0     |
| MRGPRX2   | 2.036  | 0     |
| MRGPRX3   | 1.639  | 0     |
| MRGPRX4   | 1.442  | 0     |
| M-RIP     | 12.368 | 25.03 |
| MRLC2     | 0.879  | 94.97 |
| MRM1      | 1.833  | 6.85  |
| MRO       | 2.108  | 0     |
| MRP63     | 2.658  | 17.72 |
| MRP63P1   | 0.285  | 0     |
| MRP63P10  | 0.262  | 0     |

|          |       |       |
|----------|-------|-------|
| MRP63P2  | 0.208 | 0     |
| MRP63P3  | 0.196 | 0     |
| MRP63P6  | 0.326 | 0     |
| MRP63P7  | 0.273 | 0     |
| MRP63P8  | 0.275 | 0     |
| MRP63P9  | 0.195 | 0     |
| MRPL1    | 1.258 | 11.92 |
| MRPL10   | 1.921 | 22.41 |
| MRPL11   | 1.249 | 32.31 |
| MRPL11P2 | 0.419 | 1.41  |
| MRPL11P3 | 0.11  | 0     |
| MRPL12   | 1     | 49.45 |
| MRPL13   | 1.11  | 6.6   |
| MRPL14   | 0.775 | 46.63 |
| MRPL14P1 | 0.197 | 0     |
| MRPL15   | 1.136 | 17.73 |
| MRPL15P1 | 1.163 | 0     |
| MRPL16   | 1.449 | 20.93 |
| MRPL17   | 1.044 | 30.18 |
| MRPL18   | 0.971 | 41.04 |
| MRPL19   | 7.827 | 2.17  |
| MRPL2    | 1.286 | 24.56 |
| MRPL20   | 0.681 | 49.11 |
| MRPL20P1 | 0.47  | 2.69  |
| MRPL21   | 1.044 | 24.52 |
| MRPL22   | 0.839 | 20.18 |
| MRPL22P1 | 0.688 | 0.49  |
| MRPL23   | 0.699 | 55.91 |
| MRPL24   | 1.006 | 46.89 |
| MRPL27   | 3.158 | 6.77  |
| MRPL28   | 1.099 | 49.06 |
| MRPL2P1  | 0.92  | 1.93  |
| MRPL3    | 1.733 | 21.48 |
| MRPL30   | 3.093 | 6.45  |
| MRPL30P1 | 0.371 | 2.04  |
| MRPL30P2 | 0.382 | 0     |
| MRPL32   | 1.79  | 11.06 |
| MRPL32P1 | 0.264 | 0     |
| MRPL33   | 0.827 | 16.2  |
| MRPL34   | 0.968 | 38.46 |
| MRPL35   | 3.336 | 6.04  |
| MRPL35P1 | 0.372 | 0.23  |
| MRPL35P2 | 0.371 | 0.23  |
| MRPL35P3 | 0.37  | 0.23  |
| MRPL35P4 | 0.369 | 0     |
| MRPL36   | 0.604 | 34.45 |
| MRPL36P1 | 0.312 | 1.35  |
| MRPL37   | 1.478 | 49.81 |
| MRPL38   | 1.868 | 30.3  |
| MRPL39   | 1.27  | 8.69  |

|          |       |        |
|----------|-------|--------|
| MRPL3P1  | 1.038 | 8.19   |
| MRPL4    | 3.064 | 17.45  |
| MRPL40   | 0.776 | 27.58  |
| MRPL41   | 0.568 | 69.26  |
| MRPL42   | 2.303 | 4.64   |
| MRPL42P1 | 0.426 | 0      |
| MRPL42P2 | 0.429 | 0      |
| MRPL42P3 | 0.339 | 0.49   |
| MRPL42P4 | 0.702 | 0      |
| MRPL42P5 | 0.667 | 0.5    |
| MRPL43   | 3.318 | 14.85  |
| MRPL44   | 1.728 | 9.89   |
| MRPL45   | 1.696 | 37.25  |
| MRPL45P1 | 0.749 | 0.9    |
| MRPL46   | 0.985 | 13.17  |
| MRPL47   | 1.399 | 9.21   |
| MRPL48   | 1.977 | 7.89   |
| MRPL48P1 | 0.636 | 1.46   |
| MRPL49   | 2.089 | 25.85  |
| MRPL49P1 | 0.537 | 0      |
| MRPL49P2 | 0.468 | 0      |
| MRPL50   | 0.998 | 4.98   |
| MRPL50P1 | 0.398 | 0      |
| MRPL50P2 | 0.482 | 0.17   |
| MRPL50P3 | 0.477 | 0      |
| MRPL50P4 | 0.48  | 0      |
| MRPL51   | 0.663 | 115.87 |
| MRPL51P1 | 0.263 | 0      |
| MRPL51P2 | 0.376 | 2.69   |
| MRPL52   | 2.463 | 6.81   |
| MRPL53   | 0.616 | 67.01  |
| MRPL53P1 | 0.354 | 0      |
| MRPL54   | 0.609 | 40.81  |
| MRPL55   | 1.284 | 18.89  |
| MRPL9    | 1.292 | 52.62  |
| MRPL9P1  | 1.026 | 2.79   |
| MRPS10   | 2.11  | 7.67   |
| MRPS10P1 | 0.131 | 0      |
| MRPS10P2 | 0.404 | 0      |
| MRPS10P5 | 0.579 | 7.85   |
| MRPS11   | 1.415 | 17.86  |
| MRPS11P1 | 0.619 | 1.22   |
| MRPS12   | 1.606 | 18.78  |
| MRPS14   | 1.081 | 14.03  |
| MRPS15   | 0.883 | 50.75  |
| MRPS15P1 | 0.756 | 0      |
| MRPS15P2 | 0.978 | 0.43   |
| MRPS16   | 2.634 | 21.53  |
| MRPS16P  | 0.411 | 0.2    |
| MRPS16P1 | 0.416 | 4.45   |



|           |        |       |
|-----------|--------|-------|
| MRPS16P3  | 0.41   | 0     |
| MRPS17    | 1.172  | 8.62  |
| MRPS17P1  | 0.393  | 1.5   |
| MRPS17P3  | 0.389  | 0     |
| MRPS17P5  | 0.186  | 0     |
| MRPS17P6  | 0.211  | 0     |
| MRPS17P7  | 0.393  | 0     |
| MRPS17P9  | 0.393  | 0.21  |
| MRPS18A   | 1.06   | 25.91 |
| MRPS18AP1 | 0.592  | 0.99  |
| MRPS18B   | 4.227  | 0.04  |
| MRPS18BP1 | 0.192  | 0     |
| MRPS18BP2 | 0.776  | 2.39  |
| MRPS18C   | 1.014  | 14.79 |
| MRPS18CP2 | 0.293  | 4.03  |
| MRPS18CP3 | 0.229  | 0     |
| MRPS18CP5 | 0.431  | 0.2   |
| MRPS18CP6 | 0.243  | 0     |
| MRPS2     | 1.434  | 28.54 |
| MRPS21    | 1.142  | 46.25 |
| MRPS21P1  | 0.262  | 0.32  |
| MRPS21P2  | 0.264  | 0.32  |
| MRPS21P3  | 0.264  | 0     |
| MRPS21P4  | 0.145  | 0     |
| MRPS21P5  | 0.27   | 0     |
| MRPS21P6  | 0.264  | 7.97  |
| MRPS21P7  | 0.26   | 0     |
| MRPS21P8  | 0.26   | 0     |
| MRPS21P9  | 0.267  | 0     |
| MRPS22    | 1.123  | 12.53 |
| MRPS22P1  | 0.457  | 0     |
| MRPS23    | 0.903  | 26.03 |
| MRPS23P1  | 1.808  | 0.47  |
| MRPS24    | 1.296  | 37.05 |
| MRPS24P1  | 0.492  | 0     |
| MRPS25    | 4.566  | 7.36  |
| MRPS25P1  | 0.52   | 0.16  |
| MRPS26    | 1.039  | 38.43 |
| MRPS27    | 2.631  | 29.81 |
| MRPS28    | 0.707  | 14.06 |
| MRPS29P1  | 3.385  | 0     |
| MRPS29P2  | 0.515  | 11.61 |
| MRPS30    | 1.67   | 11.85 |
| MRPS31    | 1.284  | 10.17 |
| MRPS31P1  | 0.213  | 0     |
| MRPS31P2  | 16.253 | 0.25  |
| MRPS33    | 1.528  | 8.93  |
| MRPS33P1  | 0.167  | 0     |
| MRPS33P2  | 0.322  | 0     |
| MRPS33P3  | 0.322  | 0.26  |

|          |       |        |
|----------|-------|--------|
| MRPS33P4 | 0.252 | 0      |
| MRPS34   | 1.003 | 56.86  |
| MRPS35   | 1.865 | 14.81  |
| MRPS35P1 | 0.128 | 0      |
| MRPS35P2 | 0.179 | 0      |
| MRPS35P3 | 0.539 | 0      |
| MRPS36   | 2.658 | 2.44   |
| MRPS36P1 | 0.31  | 11.96  |
| MRPS36P2 | 0.103 | 0      |
| MRPS36P3 | 0.133 | 0      |
| MRPS36P4 | 0.302 | 0      |
| MRPS36P5 | 0.302 | 0      |
| MRPS36P6 | 0.221 | 0      |
| MRPS5    | 1.661 | 25.51  |
| MRPS5P3  | 1.304 | 4.33   |
| MRPS5P4  | 0.338 | 0      |
| MRPS6    | 2.309 | 47.68  |
| MRPS6P1  | 0.364 | 0      |
| MRPS6P2  | 0.374 | 5.41   |
| MRPS6P4  | 0.308 | 0      |
| MRPS7    | 1.371 | 26.23  |
| MRPS7P1  | 0.705 | 0      |
| MRPS7P2  | 1.049 | 0.65   |
| MRPS9    | 1.435 | 13.85  |
| MRRF     | 2.676 | 3.46   |
| MRS2L    | 3.348 | 2.09   |
| MRTO4    | 1.563 | 19.46  |
| MRVI1    | 5.361 | 5.83   |
| MS4A1    | 3.61  | 114.06 |
| MS4A10   | 2.296 | 0.07   |
| MS4A12   | 1.167 | 0      |
| MS4A13   | 0.928 | 0      |
| MS4A2    | 3.725 | 0      |
| MS4A3    | 1.817 | 1.3    |
| MS4A4A   | 1.811 | 5.81   |
| MS4A5    | 0.722 | 0      |
| MS4A6A   | 3.024 | 0.33   |
| MS4A6E   | 0.66  | 0.13   |
| MS4A7    | 3.141 | 1.77   |
| MS4A8B   | 1.353 | 0      |
| MSC      | 1.931 | 0      |
| MSGN1    | 1.437 | 32.95  |
| MSH2     | 3.145 | 9.21   |
| MSH3     | 4.62  | 1.98   |
| MSH4     | 3.203 | 0.03   |
| MSH5     | 8.711 | 1.11   |
| MSH6     | 4.263 | 33.13  |
| MSI1     | 2.95  | 0.03   |
| MSI2     | 6.051 | 17.72  |
| MSL-1    | 7.821 | 11.35  |

|         |        |        |
|---------|--------|--------|
| MSL2L1  | 4.696  | 8.93   |
| MSL3L1  | 6.092  | 3.81   |
| MSLN    | 2.219  | 0      |
| MSMB    | 0.897  | 0      |
| MSN     | 3.97   | 214.9  |
| MSNL1   | 3.864  | 21.8   |
| MSR1    | 5.35   | 0.5    |
| MSRA    | 1.482  | 22.85  |
| MSRB2   | 0.908  | 13.64  |
| MSRB3   | 4.51   | 0.09   |
| MST1    | 2.223  | 1.75   |
| MST101  | 3.491  | 5.07   |
| MST150  | 1.975  | 89.52  |
| MST1R   | 4.536  | 0.31   |
| MSTO1   | 2.44   | 10.95  |
| MSTP2   | 0.4    | 0      |
| MSTP7   | 0.411  | 0      |
| MSTP9   | 13.517 | 0.1    |
| MSX1    | 1.933  | 2.87   |
| MSX2    | 2.208  | 0      |
| MSX2P   | 2.162  | 0.04   |
| MT1A    | 0.396  | 0      |
| MT1B    | 0.38   | 0      |
| MT1DP   | 0.435  | 0.2    |
| MT1E    | 0.506  | 26.47  |
| MT1F    | 0.438  | 32.7   |
| MT1G    | 0.396  | 34.89  |
| MT1H    | 0.349  | 3.38   |
| MT1JP   | 1.762  | 0.15   |
| MT1L    | 1.118  | 0      |
| MT1M    | 0.397  | 1.7    |
| MT1P1   | 0.399  | 0      |
| MT1P2   | 0.52   | 3.89   |
| MT1P3   | 0.339  | 6.96   |
| MT1X    | 0.391  | 148.22 |
| MT2A    | 0.372  | 56.16  |
| MT2P1   | 0.186  | 9.96   |
| MT3     | 0.582  | 0      |
| MT4     | 0.189  | 0      |
| MTA1    | 2.662  | 32.44  |
| MTA2    | 3.06   | 69.62  |
| MTA3    | 1.857  | 6.48   |
| MTAC2D1 | 4.604  | 0.19   |
| MTAP    | 4.922  | 1.47   |
| MTBP    | 3.059  | 0.82   |
| MTCH1   | 2.487  | 55.04  |
| MTCH2   | 2.474  | 16.14  |
| MTCO1P2 | 1.03   | 139.68 |
| MTCO2L  | 0.477  | 0      |
| MTCP1   | 3.485  | 1.69   |

|         |       |       |
|---------|-------|-------|
| MTDH    | 4.081 | 20.45 |
| MTERF   | 4.326 | 0.72  |
| MTERFD1 | 1.406 | 3.36  |
| MTERFD2 | 5.718 | 11.11 |
| MTERFD3 | 1.876 | 1.57  |
| MTF1    | 3.301 | 1.25  |
| MTF2    | 2.562 | 9.6   |
| MTFMT   | 1.736 | 4.81  |
| MTFR1   | 2.635 | 1.15  |
| MTG1    | 1.614 | 10.65 |
| MTHFD1  | 3.11  | 15.44 |
| MTHFD1L | 3.598 | 6.35  |
| MTHFD2  | 2.589 | 6.71  |
| MTHFD2L | 2.453 | 0.69  |
| MTHFR   | 7.105 | 3.2   |
| MTHFS   | 0.857 | 7.47  |
| MTHFSD  | 2.551 | 7.16  |
| MTIF2   | 3.029 | 5.56  |
| MTIF2P1 | 1.587 | 1.06  |
| MTIF3   | 2.132 | 63.41 |
| MTL5    | 5.192 | 0.26  |
| MTM1    | 3.412 | 3.82  |
| MTMR1   | 4.092 | 7.78  |
| MTMR10  | 2.216 | 2.09  |
| MTMR11  | 2.324 | 0.22  |
| MTMR12  | 5.187 | 5.6   |
| MTMR14  | 2.406 | 34.03 |
| MTMR15  | 4.835 | 6.05  |
| MTMR2   | 4.997 | 4.01  |
| MTMR3   | 5.99  | 7.17  |
| MTMR4   | 5.785 | 8.04  |
| MTMR6   | 4.185 | 1.73  |
| MTMR7   | 3.85  | 0.22  |
| MTMR8   | 2.639 | 0.25  |
| MTMR9   | 7.406 | 0.73  |
| MTND2P2 | 1.575 | 0     |
| MTNR1A  | 1.105 | 0     |
| MTNR1B  | 1.662 | 0     |
| MTO1    | 3.322 | 6.9   |
| MTP18   | 1.762 | 9.14  |
| MTPN    | 7.476 | 13.58 |
| MTR     | 7.102 | 2.68  |
| MTRF1   | 2.174 | 2.44  |
| MTRF1L  | 2.53  | 1.97  |
| MTRR    | 3.482 | 4.69  |
| MTSS1   | 4.933 | 4.2   |
| MTTP    | 3.392 | 0     |
| MTUS1   | 9.7   | 0.03  |
| MTX1    | 1.768 | 11.96 |
| MTX1P   | 3.461 | 3.6   |

|         |        |       |
|---------|--------|-------|
| MTX2    | 1.839  | 2.43  |
| MTX3    | 6.155  | 0.23  |
| MUC1    | 1.969  | 0.25  |
| MUC12   | 8.561  | 2.1   |
| MUC13   | 2.861  | 0     |
| MUC15   | 2.084  | 0     |
| MUC16   | 43.816 | 0     |
| MUC17   | 28.7   | 0.08  |
| MUC19   | 21.987 | 0.02  |
| MUC2    | 5.903  | 0     |
| MUC20   | 1.828  | 1.94  |
| MUC3B   | 3.749  | 0     |
| MUC4    | 9.087  | 49.82 |
| MUC5AC  | 3.811  | 0     |
| MUC5B   | 17.695 | 0.01  |
| MUC6    | 6.214  | 0.13  |
| MUC7    | 2.341  | 0     |
| MUCDHL  | 3.125  | 0.03  |
| MUM1    | 4.179  | 9.09  |
| MUM1L1  | 3.957  | 0     |
| MUS81   | 2.319  | 18.2  |
| MUSK    | 2.666  | 0     |
| MUSTN1  | 0.971  | 4.25  |
| MUT     | 2.776  | 5.58  |
| MUTED   | 2.27   | 2.64  |
| MUTYH   | 1.839  | 7.51  |
| MVD     | 1.795  | 12.43 |
| MVK     | 1.952  | 3.24  |
| MVP     | 3.116  | 33.2  |
| MX1     | 2.787  | 3.93  |
| MX2     | 2.961  | 0.54  |
| MXD1    | 5.587  | 0.66  |
| MXD3    | 1.049  | 32.68 |
| MXD4    | 3.773  | 35.12 |
| MXI1    | 3.968  | 3.5   |
| MXRA5   | 9.638  | 0     |
| MXRA7   | 5.207  | 30.1  |
| MXRA8   | 2.273  | 1.49  |
| MYADM   | 3.769  | 38.98 |
| MYADML  | 1.949  | 0.04  |
| MYB     | 3.314  | 64.24 |
| MYBBP1A | 5.718  | 15.5  |
| MYBL1   | 5.698  | 0.36  |
| MYBL2   | 2.713  | 24.71 |
| MYBPC1  | 4.033  | 0     |
| MYBPC2  | 3.561  | 4.97  |
| MYBPC3  | 4.2    | 0.18  |
| MYBPH   | 1.806  | 0.04  |
| MYBPHL  | 1.372  | 0     |
| MYC     | 2.359  | 27.78 |

|         |        |        |
|---------|--------|--------|
| MYCBP   | 2.093  | 10.66  |
| MYCBP2  | 14.734 | 6.36   |
| MYCBPAP | 3.123  | 0.16   |
| MYCL1   | 5.66   | 0.06   |
| MYCL2   | 1.077  | 0      |
| MYCL3   | 1.13   | 0      |
| MYCN    | 2.605  | 0      |
| MYCT1   | 1.083  | 0      |
| MYD88   | 2.814  | 24.85  |
| MYEF2   | 4.543  | 0      |
| MYEOV   | 2.287  | 0      |
| MYEOV2  | 0.904  | 24.88  |
| MYF5    | 1.427  | 0      |
| MYF6    | 1.294  | 0      |
| MYH1    | 5.925  | 0      |
| MYH10   | 7.619  | 7.21   |
| MYH11   | 7.931  | 0.21   |
| MYH13   | 5.992  | 0      |
| MYH14   | 6.786  | 0.4    |
| MYH15   | 7.075  | 0.2    |
| MYH16   | 53.879 | 0      |
| MYH2    | 6.046  | 0      |
| MYH3    | 6.025  | 0.38   |
| MYH4    | 6.016  | 0      |
| MYH6    | 5.94   | 0      |
| MYH7    | 6.008  | 0      |
| MYH7B   | 6.289  | 0.35   |
| MYH8    | 6.016  | 0      |
| MYH9    | 7.42   | 102.79 |
| MYL1    | 1.144  | 0      |
| MYL2    | 0.787  | 0      |
| MYL3    | 0.877  | 0      |
| MYL4    | 0.983  | 4.28   |
| MYL5    | 0.661  | 5.35   |
| MYL6    | 0.95   | 758.04 |
| MYL6B   | 0.869  | 86.76  |
| MYL6P   | 0.645  | 23.9   |
| MYL7    | 2.33   | 16.45  |
| MYL9    | 1.187  | 42.51  |
| MYLC2PL | 1.362  | 0      |
| MYLIP   | 3.072  | 6.53   |
| MYLK    | 12.152 | 7.71   |
| MYLK2   | 2.683  | 0      |
| MYLPF   | 0.655  | 0.77   |
| MYNN    | 3.134  | 3.44   |
| MYO10   | 7.787  | 4.66   |
| MYO15A  | 11.863 | 0.02   |
| MYO15B  | 2.908  | 1.19   |
| MYO16   | 6.874  | 0      |
| MYO18A  | 9.341  | 49.9   |

|          |       |       |
|----------|-------|-------|
| MYO18B   | 8.565 | 0     |
| MYO1A    | 3.613 | 0.03  |
| MYO1B    | 4.825 | 15.2  |
| MYO1C    | 4.316 | 1.48  |
| MYO1D    | 5.182 | 0.29  |
| MYO1E    | 4.715 | 0.32  |
| MYO1F    | 3.827 | 1.23  |
| MYO1G    | 6.484 | 2.58  |
| MYO3A    | 5.584 | 2.32  |
| MYO3B    | 5.56  | 0     |
| MYO5A    | 6.396 | 2.61  |
| MYO5B    | 9.508 | 0.03  |
| MYO5C    | 6.828 | 9.79  |
| MYO6     | 8.662 | 0.02  |
| MYO7A    | 7.462 | 12.27 |
| MYO7B    | 6.715 | 0.11  |
| MYO9A    | 8.459 | 1.08  |
| MYO9B    | 7.459 | 20.96 |
| MYOC     | 2.045 | 0.58  |
| MYOCD    | 2.817 | 0     |
| MYOD1    | 1.806 | 0     |
| MYOG     | 1.53  | 0     |
| MYOHD1   | 5.246 | 4.19  |
| MYOM1    | 5.847 | 0.42  |
| MYOM2    | 4.921 | 0.51  |
| MYOM3    | 4.856 | 0     |
| MYOT     | 2.244 | 0.08  |
| MYOZ1    | 1.541 | 0.54  |
| MYOZ2    | 2.508 | 0     |
| MYOZ3    | 3.443 | 0.25  |
| MYPN     | 5.699 | 0     |
| MYRIP    | 4.87  | 3.34  |
| MYSM1    | 3.483 | 3.37  |
| MYST1    | 1.518 | 24.36 |
| MYST2    | 3.556 | 18.22 |
| MYST3    | 7.86  | 11.08 |
| MYST4    | 6.533 | 8.34  |
| MYT1     | 5.535 | 0.02  |
| MYT1L    | 7.136 | 0.13  |
| MZF1     | 3.124 | 7.52  |
| N4BP1    | 7.106 | 5.68  |
| N4BP2    | 6.598 | 1.98  |
| N4BP3    | 5.987 | 0.93  |
| N6AMT1   | 4.865 | 0.74  |
| N6AMT2   | 0.875 | 11.55 |
| NAALAD2  | 3.129 | 0.03  |
| NAALADL1 | 2.687 | 0.35  |
| NAALADL2 | 4.912 | 0     |
| NAB1     | 4.469 | 3.28  |
| NAB2     | 2.498 | 2.23  |

|          |        |        |
|----------|--------|--------|
| NACA     | 1.059  | 517.74 |
| NACAL    | 0.777  | 196.55 |
| NACAP1   | 0.703  | 19.65  |
| NADK     | 3.235  | 22.29  |
| NADSYN1  | 2.433  | 23.34  |
| NAG      | 7.282  | 18.48  |
| NAG18    | 1.582  | 0.64   |
| NAG6     | 8.336  | 0.16   |
| NAG8     | 5.139  | 0.05   |
| NAGA     | 3.606  | 18.97  |
| NAGK     | 1.535  | 23.49  |
| NAGLU    | 2.783  | 3.84   |
| NAGPA    | 2.203  | 7.07   |
| NAGS     | 2.072  | 0      |
| NAIP     | 10.452 | 0.01   |
| NANOG    | 2.098  | 0      |
| NANOGP1  | 26.133 | 0      |
| NANOGP10 | 1.816  | 0      |
| NANOGP11 | 0.401  | 0      |
| NANOGP2  | 1.484  | 0      |
| NANOGP3  | 0.689  | 0      |
| NANOGP4  | 3.599  | 0.12   |
| NANOGP5  | 1.984  | 0      |
| NANOGP6  | 0.941  | 0      |
| NANOGP7  | 1.565  | 0      |
| NANOGP8  | 2.14   | 0      |
| NANOGP9  | 1.513  | 0      |
| NANOS1   | 8.476  | 0.51   |
| NANOS2   | 1.565  | 0      |
| NANOS3   | 0.949  | 0      |
| NANP     | 2.337  | 1.05   |
| NANS     | 1.17   | 28.8   |
| NAP1L1   | 5.136  | 56.29  |
| NAP1L2   | 2.531  | 0.03   |
| NAP1L3   | 2.68   | 0.03   |
| NAP1L4   | 2.518  | 34.56  |
| NAP1L5   | 1.914  | 2.69   |
| NAP1L6   | 2.044  | 0      |
| NAPA     | 1.842  | 53.14  |
| NAPB     | 3.787  | 2.67   |
| NAPE-PLD | 9.596  | 0.37   |
| NAPG     | 1.163  | 3.48   |
| NAPRT1   | 1.857  | 26.17  |
| NAPSA    | 1.392  | 4      |
| NAPSB    | 12.279 | 28.46  |
| NARF     | 2.048  | 23.45  |
| NARFL    | 2.093  | 33.93  |
| NARG1    | 5.554  | 3.91   |
| NARG1L   | 4.754  | 1.37   |
| NARG2    | 7.564  | 3.99   |



|           |        |       |
|-----------|--------|-------|
| NARS      | 2.714  | 23.78 |
| NARS2     | 2.098  | 9.59  |
| NARSP     | 3.256  | 0.2   |
| NASP      | 3.505  | 39.29 |
| NASPP1    | 3.031  | 11.59 |
| NAT1      | 1.424  | 1.18  |
| NAT10     | 4.002  | 25.17 |
| NAT11     | 3.308  | 6.85  |
| NAT12     | 2.892  | 1.72  |
| NAT13     | 3.576  | 13.41 |
| NAT14     | 1.313  | 6.22  |
| NAT2      | 1.276  | 0     |
| NAT5      | 1.746  | 23.21 |
| NAT6      | 1.195  | 5.85  |
| NAT8      | 0.954  | 0     |
| NAT8B     | 0.83   | 0.1   |
| NAT8L     | 2.342  | 0.07  |
| NAT9      | 1.875  | 19.72 |
| NAV1      | 12.469 | 26.07 |
| NAV2      | 11.14  | 1.07  |
| NAV3      | 9.63   | 0     |
| NBEA      | 10.792 | 0.3   |
| NBEAL1    | 4.656  | 0.13  |
| NBEAL2    | 8.887  | 10.27 |
| NBL1      | 2.18   | 2.7   |
| NBLA00301 | 1.599  | 0     |
| NBN       | 4.967  | 5.77  |
| NBPF1     | 4.288  | 1.35  |
| NBPF11    | 5.541  | 0.64  |
| NBPF13P   | 39.878 | 0.02  |
| NBPF14    | 3.689  | 0.18  |
| NBPF15    | 4.02   | 0.61  |
| NBPF17P   | 64.487 | 0.02  |
| NBPF18P   | 9.839  | 0.03  |
| NBPF20    | 2.931  | 0.08  |
| NBPF21P   | 21.789 | 0     |
| NBPF2P    | 4.853  | 0.17  |
| NBPF3     | 3.766  | 0.65  |
| NBPF4     | 2.817  | 0     |
| NBPF6     | 2.982  | 0     |
| NBPF7     | 1.887  | 0     |
| NBPF8     | 2.92   | 0.38  |
| NBPF9     | 2.181  | 0     |
| NBR1      | 2.908  | 3.25  |
| NBR2      | 1.368  | 6.78  |
| NCALD     | 3.279  | 1.83  |
| NCAM1     | 4.243  | 0.1   |
| NCAM2     | 3.699  | 0     |
| NCAN      | 6.289  | 0.02  |
| NCAPD2    | 4.486  | 29.37 |

|         |        |        |
|---------|--------|--------|
| NCAPD3  | 5.605  | 8.55   |
| NCAPG   | 4.664  | 4.63   |
| NCAPG2  | 10.506 | 2.06   |
| NCAPH   | 4.495  | 5.38   |
| NCAPH2  | 2.76   | 9.98   |
| NCBP1   | 3.059  | 6.48   |
| NCBP2   | 2.101  | 24.66  |
| NCDN    | 3.973  | 9.16   |
| NCF1    | 2.796  | 10.33  |
| NCF2    | 2.389  | 26.51  |
| NCF4    | 2.215  | 67.31  |
| NCK1    | 1.914  | 9.51   |
| NCK2    | 4.021  | 6.08   |
| NCKAP1  | 4.632  | 0.13   |
| NCKAP1L | 4.443  | 48.96  |
| NCKIPSD | 3.054  | 7.61   |
| NCL     | 2.717  | 240.21 |
| NCLN    | 3.733  | 23.96  |
| NCOA1   | 9.602  | 8.04   |
| NCOA2   | 6.448  | 3.57   |
| NCOA3   | 8.028  | 5.2    |
| NCOA4   | 3.487  | 46.74  |
| NCOA4P  | 3.043  | 1.39   |
| NCOA5   | 3.209  | 20.27  |
| NCOA6   | 7.062  | 8.31   |
| NCOA7   | 5.521  | 2.41   |
| NCOR1   | 11.49  | 6.29   |
| NCOR2   | 8.825  | 36.21  |
| NCR1    | 1.135  | 0      |
| NCR2    | 0.932  | 0      |
| NCR3    | 3.126  | 0      |
| NCSTN   | 2.935  | 29.76  |
| ND1     | 0.957  | 0      |
| ND2     | 1.044  | 0      |
| ND3     | 0.346  | 0      |
| ND4     | 1.378  | 0      |
| ND4L    | 0.297  | 0      |
| ND5     | 1.812  | 0      |
| ND6     | 0.525  | 0      |
| NDC80   | 2.072  | 7.52   |
| NDE1    | 2.521  | 11.19  |
| NDEL1   | 3.644  | 9.25   |
| NDFIP1  | 2.533  | 9.54   |
| NDFIP2  | 2.636  | 0.29   |
| NDN     | 1.897  | 0.08   |
| NDNL2   | 1.66   | 9.59   |
| NDOR1   | 2.434  | 4.43   |
| NDP     | 1.833  | 0      |
| NDRG1   | 3.032  | 70.63  |
| NDRG2   | 2.199  | 17     |

|          |       |        |
|----------|-------|--------|
| NDRG3    | 2.964 | 17.85  |
| NDRG4    | 5.309 | 13.5   |
| NDST1    | 7.915 | 15.9   |
| NDST2    | 3.749 | 9.01   |
| NDST3    | 3.181 | 0      |
| NDST4    | 3.351 | 0      |
| NDUFA1   | 0.475 | 178.58 |
| NDUFA10  | 1.527 | 43.91  |
| NDUFA11  | 0.799 | 99.73  |
| NDUFA12  | 0.6   | 61.49  |
| NDUFA12L | 0.622 | 17.2   |
| NDUFA13  | 0.959 | 178.84 |
| NDUFA2   | 0.586 | 69.57  |
| NDUFA3   | 0.341 | 120.79 |
| NDUFA4   | 1.646 | 29.73  |
| NDUFA4L2 | 1.188 | 0.07   |
| NDUFA4P1 | 0.63  | 23.8   |
| NDUFA5   | 3.101 | 6.52   |
| NDUFA6   | 1.184 | 27.6   |
| NDUFA7   | 0.511 | 63.14  |
| NDUFA8   | 0.844 | 35.93  |
| NDUFA9   | 1.269 | 30.67  |
| NDUFA9P1 | 1.15  | 2.27   |
| NDUFAB1  | 0.667 | 47.23  |
| NDUFAF1  | 1.457 | 7.29   |
| NDUFB1   | 0.42  | 52.55  |
| NDUFB10  | 0.849 | 94.65  |
| NDUFB11  | 0.948 | 86.37  |
| NDUFB2   | 0.99  | 27.57  |
| NDUFB3   | 0.675 | 31.83  |
| NDUFB3P1 | 0.574 | 0.88   |
| NDUFB3P2 | 0.304 | 1.1    |
| NDUFB3P3 | 0.46  | 0      |
| NDUFB3P4 | 0.456 | 12.93  |
| NDUFB3P5 | 0.401 | 0      |
| NDUFB4   | 0.527 | 101.82 |
| NDUFB5   | 1.059 | 33.81  |
| NDUFB6   | 0.862 | 8.2    |
| NDUFB7   | 0.543 | 104.4  |
| NDUFB8   | 0.686 | 66.06  |
| NDUFB8P1 | 0.658 | 0.13   |
| NDUFB9   | 0.703 | 91.3   |
| NDUFC1   | 0.412 | 46.82  |
| NDUFC2   | 2.138 | 21.51  |
| NDUFS1   | 3.417 | 8.95   |
| NDUFS2   | 2.042 | 26.36  |
| NDUFS3   | 0.888 | 68.3   |
| NDUFS4   | 0.653 | 35.73  |
| NDUFS5   | 0.511 | 142.75 |
| NDUFS6   | 0.533 | 97.04  |

|          |        |        |
|----------|--------|--------|
| NDUFS7   | 0.756  | 46.24  |
| NDUFS8   | 0.779  | 81.21  |
| NDUFV1   | 1.541  | 86.75  |
| NDUFV2   | 0.826  | 44.36  |
| NDUFV2P1 | 1.181  | 14.41  |
| NDUFV3   | 2.13   | 10.28  |
| NEB      | 20.581 | 0.03   |
| NEBL     | 8.82   | 0.01   |
| NECAP1   | 2.564  | 5.39   |
| NECAP2   | 2.004  | 123.33 |
| NEDD1    | 2.36   | 3.14   |
| NEDD4    | 10.567 | 1.33   |
| NEDD4L   | 4.869  | 0.17   |
| NEDD8    | 0.606  | 187.8  |
| NEDD9    | 5.332  | 10.5   |
| NEFH     | 3.683  | 0.03   |
| NEFL     | 1.633  | 0      |
| NEFM     | 3.238  | 0      |
| NEGR1    | 5.669  | 24.93  |
| NEIL1    | 1.813  | 5.67   |
| NEIL2    | 2.661  | 8.54   |
| NEIL3    | 2.273  | 0.63   |
| NEK1     | 5.501  | 2.02   |
| NEK10    | 2.845  | 0      |
| NEK11    | 3.278  | 0.18   |
| NEK2     | 2.13   | 3.72   |
| NEK2P    | 2.064  | 0      |
| NEK3     | 2.509  | 2.82   |
| NEK4     | 3.696  | 4.81   |
| NEK5     | 2.912  | 0      |
| NEK6     | 2.954  | 11.4   |
| NEK7     | 1.391  | 9.02   |
| NEK8     | 2.858  | 1.95   |
| NEK9     | 4.85   | 11.81  |
| NELF     | 2.956  | 8.66   |
| NELL1    | 3      | 0      |
| NELL2    | 3.196  | 0.03   |
| NENF     | 0.898  | 29.73  |
| NEO1     | 5.653  | 4.27   |
| NES      | 5.558  | 0.15   |
| NESPAS   | 1.156  | 0      |
| NET1     | 3.232  | 21.32  |
| NETO1    | 3.921  | 0      |
| NETO2    | 3.653  | 0      |
| NEU1     | 5.766  | 0.06   |
| NEU2     | 1.143  | 0      |
| NEU3     | 3.828  | 1.95   |
| NEU4     | 2.302  | 0.14   |
| NEURL    | 3.996  | 0.08   |
| NEURL2   | 1.259  | 0.93   |

|           |        |       |
|-----------|--------|-------|
| NEUROD1   | 2.502  | 0     |
| NEUROD2   | 2.018  | 0     |
| NEUROD4   | 1.481  | 0     |
| NEUROD6   | 4.314  | 0     |
| NEUROG1   | 1.668  | 0     |
| NEUROG2   | 2.287  | 0.08  |
| NEUROG3   | 1.167  | 0.58  |
| NEXN      | 2.109  | 8.23  |
| NF1       | 8.959  | 3.13  |
| NF2       | 10.998 | 4.41  |
| NFAM1     | 3.04   | 0.55  |
| NFASC     | 10.079 | 0     |
| NFAT5     | 16.904 | 1.78  |
| NFATC1    | 8.875  | 3.26  |
| NFATC2    | 4.15   | 5.6   |
| NFATC2IP  | 3.877  | 7.84  |
| NFATC3    | 7.651  | 29.63 |
| NFATC4    | 4.901  | 0     |
| NFE2      | 1.658  | 4.01  |
| NFE2L1    | 4.749  | 23.56 |
| NFE2L2    | 2.408  | 8.78  |
| NFE2L3    | 5.698  | 0.18  |
| NFIA      | 2.653  | 0.99  |
| NFIB      | 8.159  | 0.01  |
| NFIC      | 6.86   | 16.03 |
| NFIL3     | 2.085  | 13.01 |
| NFIX      | 5.576  | 16.72 |
| NFKB1     | 4.087  | 20.98 |
| NFKB2     | 3.004  | 6.67  |
| NFKBIA    | 1.55   | 43.15 |
| NFKBIB    | 2.974  | 7.73  |
| NFKBIE    | 2.581  | 3.69  |
| NFKBIL1   | 4.392  | 0.08  |
| NFKBIL2   | 6.563  | 8.67  |
| NFKBIZ    | 4.311  | 2.48  |
| NFRKB     | 4.358  | 6.84  |
| NFS1      | 2.678  | 4.69  |
| NFU1      | 1.921  | 7.89  |
| NFX1      | 5.831  | 4.96  |
| NFXL1     | 3.728  | 1.38  |
| NFYA      | 3.399  | 17.2  |
| NFYB      | 3.482  | 2.73  |
| NFYC      | 1.963  | 25.23 |
| NGB       | 1.876  | 0     |
| NGDN      | 3.9    | 5.68  |
| NGEF      | 3.156  | 0     |
| NGFB      | 1.049  | 0     |
| NGFR      | 3.387  | 13.66 |
| NGFRAP1   | 1.837  | 0.04  |
| NGFRAP1L1 | 0.857  | 0     |

|           |        |        |
|-----------|--------|--------|
| NGLY1     | 2.182  | 18.34  |
| NGRN      | 2.085  | 21.17  |
| NHEDC1    | 1.859  | 0.09   |
| NHEJ1     | 2.037  | 6.91   |
| NHLH1     | 2.513  | 0.1    |
| NHLH2     | 2.512  | 0      |
| NHLRC1    | 2.134  | 0      |
| NHLRC2    | 2.55   | 2.15   |
| NHN1      | 3.562  | 21.44  |
| NHP2L1    | 1.697  | 87.66  |
| NHS       | 8.761  | 0      |
| NHSL1     | 10.115 | 0.5    |
| NIBP      | 4.472  | 9.65   |
| NICN1     | 3.227  | 3.5    |
| NICN2P    | 2.322  | 0.18   |
| NID1      | 4.89   | 0.22   |
| NID2      | 5.046  | 1.42   |
| NIF3L1    | 1.591  | 9.53   |
| NIN       | 11.646 | 7.26   |
| NINJ1     | 1.272  | 61.46  |
| NINJ2     | 1.062  | 4.92   |
| NIP30     | 2.019  | 27.24  |
| NIP7      | 2.184  | 15.04  |
| NIPA1     | 6.565  | 2.46   |
| NIPA2     | 3.087  | 26.41  |
| NIPBL     | 10.126 | 6.12   |
| NIPSNAP1  | 2.236  | 27.8   |
| NIPSNAP3A | 1.635  | 10.41  |
| NIPSNAP3B | 1.752  | 1.69   |
| NISCH     | 5.386  | 37.3   |
| NIT1      | 1.362  | 18.74  |
| NIT2      | 0.98   | 13.5   |
| NKAP      | 1.575  | 4.71   |
| NKD1      | 2.586  | 0.13   |
| NKD2      | 1.798  | 0.33   |
| NKG7      | 0.826  | 110.85 |
| NKIRAS1   | 1.995  | 1.39   |
| NKIRAS2   | 3.076  | 18.98  |
| NKPD1     | 4.304  | 25.97  |
| NKRF      | 3.218  | 2.78   |
| NKTR      | 10.3   | 4.65   |
| NKX1-1    | 2.94   | 0      |
| NKX1-2    | 0.75   | 0      |
| NKX2-2    | 2.092  | 0      |
| NKX2-3    | 1.98   | 0      |
| NKX2-5    | 1.585  | 0      |
| NKX2-6    | 0.684  | 0      |
| NKX2-8    | 1.803  | 0      |
| NKX3-1    | 3.259  | 0.1    |
| NKX6-1    | 1.116  | 0      |

|           |       |        |
|-----------|-------|--------|
| NKX6-2    | 0.834 | 0      |
| NKX6-3    | 0.551 | 0      |
| NLE1      | 3.035 | 7.05   |
| NLF1      | 1.406 | 0      |
| NLF2      | 1.312 | 0      |
| NLGN1     | 4.918 | 0      |
| NLGN2     | 4.642 | 0.38   |
| NLGN3     | 3.895 | 0.35   |
| NLGN4X    | 5.815 | 3.07   |
| NLGN4Y    | 5.31  | 0.19   |
| NLK       | 4.055 | 3.68   |
| NLN       | 2.881 | 2.34   |
| NLRC3     | 3.415 | 1.04   |
| NLRC4     | 3.363 | 0.1    |
| NLRC5     | 6.604 | 25.64  |
| NLRP1     | 6.911 | 6.35   |
| NLRP10    | 2.02  | 0      |
| NLRP11    | 3.422 | 0      |
| NLRP12    | 5.522 | 0.15   |
| NLRP13    | 3.132 | 0      |
| NLRP14    | 3.521 | 0      |
| NLRP2     | 3.515 | 0.07   |
| NLRP2P    | 3.503 | 0      |
| NLRP3     | 4.461 | 4.04   |
| NLRP3P    | 1.745 | 0      |
| NLRP4     | 3.313 | 0      |
| NLRP5     | 3.836 | 0      |
| NLRP6     | 2.679 | 0.19   |
| NLRP7     | 3.529 | 0      |
| NLRP8     | 3.934 | 0      |
| NLRP9     | 3.484 | 0      |
| NLRP9P    | 3.836 | 0      |
| NLRX1     | 3.94  | 11.44  |
| NMB       | 1.306 | 1.22   |
| NMBR      | 1.354 | 0      |
| NMD3      | 2.95  | 5.8    |
| NME1      | 1.161 | 53.98  |
| NME1-NME2 | 1.052 | 176.8  |
| NME2      | 1.496 | 75.28  |
| NME2P1    | 0.693 | 130.55 |
| NME3      | 1.014 | 28.08  |
| NME4      | 1.007 | 110    |
| NME5      | 1.226 | 0      |
| NME6      | 1.471 | 6.24   |
| NME7      | 2.192 | 1.54   |
| NMI       | 1.42  | 13.47  |
| NMNAT1    | 1.818 | 3.94   |
| NMNAT2    | 5.861 | 0      |
| NMNAT3    | 1.863 | 0.14   |
| NMNATP    | 1.067 | 0      |

|            |        |        |
|------------|--------|--------|
| NMRAL1     | 1.358  | 19.48  |
| NMS        | 0.485  | 0      |
| NMT1       | 4.886  | 30.65  |
| NMT2       | 2.837  | 0.65   |
| NMU        | 0.816  | 0      |
| NMUR1      | 3.299  | 0.03   |
| NMUR2      | 2.041  | 0      |
| NNAT       | 1.304  | 0.32   |
| NNMT       | 1.578  | 0.54   |
| NNT        | 5.484  | 13.79  |
| NO145      | 3.13   | 0.08   |
| NOB1       | 1.716  | 40.26  |
| NOBOX      | 2.946  | 0      |
| NOC2L      | 2.739  | 25.65  |
| NOC3L      | 3.436  | 2.18   |
| NOC4L      | 1.632  | 16.05  |
| NOD1       | 8.722  | 2.54   |
| NOD2       | 4.485  | 0.25   |
| NODAL      | 2.239  | 4.33   |
| NOG        | 1.273  | 1.66   |
| NOL1       | 2.837  | 15.17  |
| NOL10      | 3.331  | 6.25   |
| NOL11      | 2.454  | 12.32  |
| NOL12      | 2.84   | 9.4    |
| NOL14      | 2.918  | 18.33  |
| NOL3       | 1.384  | 1.16   |
| NOL4       | 2.621  | 0      |
| NOL5A      | 1.937  | 61.01  |
| NOL6       | 5.713  | 5.41   |
| NOL7       | 1.092  | 29.7   |
| NOL8       | 4.281  | 9.15   |
| NOL9       | 3.223  | 4.5    |
| NOLA1      | 1.303  | 15.45  |
| NOLA2      | 1.231  | 84.99  |
| NOLA2P1    | 0.758  | 25.34  |
| NOLA3      | 0.535  | 119.19 |
| NOLC1      | 3.077  | 29.1   |
| NOM1       | 12.157 | 1.31   |
| NOMO1      | 4.247  | 3.95   |
| NOMO2      | 4.566  | 1.94   |
| NOMO3      | 4.253  | 1.86   |
| NONO       | 2.679  | 186.01 |
| NOP5/NOP58 | 1.965  | 24.69  |
| NOPE       | 6.485  | 0.03   |
| NOS1       | 7.126  | 0      |
| NOS1AP     | 2.891  | 0.06   |
| NOS2A      | 4.371  | 21.1   |
| NOS3       | 8.648  | 0.37   |
| NOSIP      | 1.098  | 44.27  |
| NOSTRIN    | 1.831  | 0.65   |



|          |        |         |
|----------|--------|---------|
| NOTCH1   | 9.298  | 7.09    |
| NOTCH2   | 11.425 | 5.45    |
| NOTCH2NL | 1.874  | 4.41    |
| NOTCH3   | 8.071  | 6.08    |
| NOTCH4   | 20.241 | 0.05    |
| NOTO     | 0.837  | 0       |
| NOTUM    | 2.218  | 0       |
| NOV      | 2.369  | 1.35    |
| NOVA1    | 4.291  | 0       |
| NOVA2    | 1.857  | 0       |
| NOX1     | 2.969  | 0.06    |
| NOX3     | 2.044  | 0       |
| NOX4     | 2.388  | 0       |
| NOX5     | 2.582  | 0       |
| NOXA1    | 1.633  | 0.05    |
| NOXO1    | 1.691  | 0.15    |
| NP       | 1.428  | 76.22   |
| N-PAC    | 3.713  | 28.06   |
| NPAL1    | 2.194  | 0       |
| NPAL2    | 2.255  | 2.87    |
| NPAL3    | 5.292  | 6.14    |
| NPAS1    | 2.043  | 0.04    |
| NPAS2    | 4.004  | 0       |
| NPAS3    | 3.55   | 0.03    |
| NPAS4    | 3.302  | 0       |
| NPAT     | 5.87   | 2.08    |
| NPB      | 0.378  | 2.23    |
| NPBWR1   | 0.987  | 0       |
| NPBWR2   | 1.002  | 0.25    |
| NPC1     | 0.1    | 483.51  |
| NPC1L1   | 10.096 | 0.03    |
| NPC2     | 0.897  | 65.65   |
| NPDC1    | 3.955  | 33.97   |
| NPEPL1   | 2.186  | 6.9     |
| NPEPPS   | 4.172  | 9.49    |
| NPFF     | 0.592  | 2.99    |
| NPFFR1   | 1.292  | 0       |
| NPFFR2   | 2.291  | 0       |
| NPHP1    | 4.231  | 0.06    |
| NPHP3    | 5.37   | 1.05    |
| NPHP4    | 5.002  | 2.8     |
| NPHS1    | 4.285  | 0       |
| NPHS2    | 1.853  | 0       |
| NIIP     | 1.07   | 1.02    |
| NPL      | 1.552  | 0.86    |
| NPLOC4   | 0.1    | 1095.91 |
| NPM1     | 1.69   | 152.42  |
| NPM1P1   | 0.49   | 0.17    |
| NPM1P12  | 2.522  | 1.07    |
| NPM1P13  | 2.502  | 0       |

|         |        |       |
|---------|--------|-------|
| NPM1P14 | 3.188  | 0.08  |
| NPM1P17 | 0.914  | 0     |
| NPM1P18 | 2.37   | 0.99  |
| NPM1P19 | 1.107  | 0.23  |
| NPM1P20 | 1.37   | 0.12  |
| NPM1P3  | 1.313  | 2.82  |
| NPM1P5  | 0.919  | 1.19  |
| NPM1P6  | 0.84   | 0.4   |
| NPM1P9  | 1.283  | 0.59  |
| NPM2    | 1.1    | 0.15  |
| NPM3    | 0.865  | 27.07 |
| NPNT    | 4.584  | 0     |
| NPPA    | 0.84   | 0.1   |
| NPPB    | 0.698  | 0     |
| NPPC    | 0.381  | 1.1   |
| NPR1    | 4.232  | 29.26 |
| NPR2    | 3.43   | 0.61  |
| NPR3    | 2.646  | 0     |
| NPSR1   | 3.648  | 0.07  |
| NPTN    | 2.441  | 13.28 |
| NPTX1   | 5.437  | 4.57  |
| NPTX2   | 5.4    | 0.02  |
| NPTXR   | 5.814  | 0.03  |
| NPVF    | 2.38   | 0     |
| NPW     | 0.829  | 1.73  |
| NPY     | 1.102  | 37.92 |
| NPY1R   | 2.759  | 0     |
| NPY2R   | 3.625  | 0     |
| NPY5R   | 1.843  | 0     |
| NPY6R   | 1.953  | 0     |
| NQO1    | 2.591  | 0.3   |
| NQO2    | 0.975  | 2.24  |
| NR0B1   | 1.536  | 0     |
| NR0B2   | 1.16   | 0     |
| NR1D1   | 2.766  | 2.92  |
| NR1D2   | 4.331  | 0.99  |
| NR1H2   | 2.021  | 32.6  |
| NR1H3   | 1.528  | 4.08  |
| NR1H4   | 2.143  | 0     |
| NR1I2   | 5.247  | 0.53  |
| NR1I3   | 1.335  | 0.7   |
| NR2C1   | 2.632  | 4.13  |
| NR2C2   | 8.33   | 5.11  |
| NR2E1   | 3.212  | 0     |
| NR2E3   | 2.917  | 0.03  |
| NR2F1   | 3.199  | 0.1   |
| NR2F2   | 3.019  | 0.03  |
| NR2F6   | 1.804  | 3.46  |
| NR3C1   | 10.042 | 12.63 |
| NR3C2   | 5.744  | 1.09  |

|         |        |       |
|---------|--------|-------|
| NR4A1   | 4.51   | 1.57  |
| NR4A2   | 5.874  | 1.09  |
| NR4A3   | 8.363  | 0.03  |
| NR5A1   | 3.095  | 0.03  |
| NR5A2   | 5.046  | 5.46  |
| NR6A1   | 2.392  | 0.18  |
| NRAP    | 5.508  | 0     |
| NRAS    | 2.479  | 10.44 |
| NRBF2   | 1.848  | 4.33  |
| NRBP1   | 2.201  | 26.67 |
| NRBP2   | 3.491  | 0.77  |
| NRCAM   | 13.938 | 0.03  |
| NRD1    | 3.821  | 32.61 |
| NRF1    | 7.258  | 4.54  |
| NRG1    | 7.723  | 0     |
| NRG2    | 3.103  | 0     |
| NRG3    | 2.091  | 0     |
| NRG4    | 0.667  | 0     |
| NRGN    | 1.299  | 0.52  |
| NRIP1   | 7.292  | 18.87 |
| NRIP2   | 2.745  | 1.2   |
| NRIP3   | 1.507  | 0.06  |
| NRK     | 8.061  | 0     |
| NRL     | 2.103  | 1.24  |
| NRM     | 4.257  | 0.06  |
| NRN1    | 2.402  | 18.37 |
| NRN1L   | 0.633  | 1.06  |
| NRP1    | 6.378  | 23.05 |
| NRP2    | 8.09   | 1.81  |
| NRSN1   | 2.345  | 0     |
| NRSN2   | 1.974  | 6.14  |
| NRTN    | 1.104  | 0.08  |
| NRXN1   | 7.286  | 0     |
| NRXN2   | 7.393  | 0.29  |
| NRXN3   | 7.734  | 4.11  |
| NSBP1   | 1.865  | 7.9   |
| NSD1    | 9.21   | 5.83  |
| NSDHL   | 1.563  | 8.3   |
| NSF     | 3.936  | 7.89  |
| NSFL1C  | 4.843  | 10.18 |
| NSL1    | 1.659  | 8.53  |
| NSMAF   | 3.552  | 5.81  |
| NSMCE1  | 1.062  | 70.67 |
| NSMCE2  | 1.194  | 9.45  |
| NSMCE4A | 1.372  | 16.21 |
| NSUN2   | 3.056  | 18.83 |
| NSUN3   | 1.435  | 1.88  |
| NSUN4   | 4.436  | 6.06  |
| NSUN5   | 4.27   | 5.47  |
| NSUN5B  | 3.916  | 2.48  |

|         |        |        |
|---------|--------|--------|
| NSUN5C  | 3.78   | 1.25   |
| NSUN6   | 2.2    | 1.3    |
| NSUN7   | 3.546  | 0      |
| NT5C    | 0.941  | 29.9   |
| NT5C1A  | 1.107  | 0      |
| NT5C1B  | 2.862  | 0      |
| NT5C2   | 3.349  | 20.55  |
| NT5C3   | 4.028  | 1.88   |
| NT5C3L  | 1.446  | 17.12  |
| NT5C3P1 | 1.243  | 2.77   |
| NT5CP1  | 0.656  | 0      |
| NT5CP2  | 0.658  | 1.28   |
| NT5DC1  | 3.129  | 2.88   |
| NT5DC2  | 2.057  | 56.67  |
| NT5DC3  | 7.568  | 0.47   |
| NT5E    | 3.832  | 12.55  |
| NT5M    | 1.588  | 1.38   |
| NTAN1   | 1.112  | 11.21  |
| NTF3    | 1.2    | 0      |
| NTF5    | 0.999  | 0      |
| NTF6A   | 1.146  | 0      |
| NTF6B   | 1.19   | 0      |
| NTF6G   | 0.972  | 0      |
| NTHL1   | 1.067  | 28.34  |
| NTN1    | 1.99   | 0.51   |
| NTN2L   | 1.986  | 0      |
| NTN4    | 3.615  | 0      |
| NTNG1   | 2.932  | 3.39   |
| NTNG2   | 2.399  | 0.49   |
| NTRK1   | 2.857  | 0      |
| NTRK2   | 17.061 | 0.03   |
| NTRK3   | 5.095  | 0      |
| NTS     | 1.234  | 0      |
| NTSR1   | 4.131  | 4.16   |
| NTSR2   | 1.703  | 0      |
| NUAK1   | 6.821  | 0      |
| NUAK2   | 3.401  | 0.14   |
| NUB1    | 8.351  | 14.39  |
| NUBP1   | 1.213  | 22.43  |
| NUBP2   | 1.35   | 29.83  |
| NUBPL   | 2.05   | 1.44   |
| NUCB1   | 2.25   | 117.52 |
| NUCB2   | 1.586  | 17.16  |
| NUCKS1  | 3.875  | 44.46  |
| NUDC    | 1.327  | 72.3   |
| NUDCD1  | 3.918  | 3.54   |
| NUDCD2  | 0.948  | 9.69   |
| NUDCD3  | 7.106  | 7.8    |
| NUDCP1  | 1.29   | 9.2    |
| NUDCP2  | 0.95   | 12.5   |

|          |        |       |
|----------|--------|-------|
| NUDT1    | 2.382  | 29.45 |
| NUDT10   | 2.001  | 0     |
| NUDT11   | 2.396  | 0     |
| NUDT12   | 3.488  | 0.34  |
| NUDT13   | 2.104  | 0.96  |
| NUDT14   | 0.845  | 12.86 |
| NUDT15   | 2.022  | 3.63  |
| NUDT16   | 3.274  | 5.61  |
| NUDT16L1 | 1.313  | 27.71 |
| NUDT16P  | 5.441  | 0     |
| NUDT17   | 1.093  | 1.93  |
| NUDT18   | 2.251  | 5.5   |
| NUDT19   | 1.471  | 2.52  |
| NUDT2    | 1.102  | 5.58  |
| NUDT21   | 4.407  | 15.46 |
| NUDT22   | 1.094  | 21.86 |
| NUDT3    | 4.9    | 29.43 |
| NUDT4    | 7.924  | 15.45 |
| NUDT4P1  | 2.565  | 26.8  |
| NUDT5    | 1.83   | 35.58 |
| NUDT6    | 1.39   | 1.45  |
| NUDT8    | 0.809  | 4.68  |
| NUDT9    | 2.035  | 9.89  |
| NUDT9P1  | 1.089  | 0.77  |
| NUF2     | 2.114  | 2.63  |
| NUFIP1   | 3.445  | 2.06  |
| NUFIP1P  | 1.679  | 2.36  |
| NUFIP2   | 4.999  | 7.51  |
| NUMA1    | 7.182  | 69.57 |
| NUMB     | 3.644  | 16.21 |
| NUMBL    | 3.561  | 1.39  |
| NUP107   | 3.124  | 7.17  |
| NUP133   | 4.17   | 9.42  |
| NUP153   | 5.687  | 6.86  |
| NUP155   | 4.613  | 4.15  |
| NUP160   | 5.383  | 7.5   |
| NUP188   | 5.689  | 12.78 |
| NUP205   | 12.474 | 3.6   |
| NUP210   | 7.191  | 8.82  |
| NUP210L  | 5.151  | 0.08  |
| NUP214   | 6.601  | 10.86 |
| NUP35    | 2.33   | 2.03  |
| NUP37    | 1.208  | 6.9   |
| NUP43    | 3.848  | 6.35  |
| NUP50    | 5.666  | 6.58  |
| NUP50P1  | 1.706  | 0.2   |
| NUP50P2  | 1.696  | 1.15  |
| NUP54    | 2.354  | 7.66  |
| NUP62    | 3.721  | 31.78 |
| NUP62CL  | 1.591  | 0.05  |

|           |        |        |
|-----------|--------|--------|
| NUP85     | 2.311  | 11.99  |
| NUP88     | 2.358  | 21.11  |
| NUP93     | 2.63   | 20.79  |
| NUP98     | 7.882  | 12.2   |
| NUPL1     | 4.467  | 4.11   |
| NUPL2     | 3.514  | 7.72   |
| NUPR1     | 0.693  | 1.22   |
| NUS1      | 2.619  | 4.09   |
| NUSAP1    | 2.75   | 23.86  |
| NUT       | 3.795  | 0      |
| NUTF2     | 0.886  | 91.84  |
| NUTF2P2   | 0.851  | 12.07  |
| NVL       | 3.064  | 6.76   |
| NWD1      | 8.393  | 0      |
| NXF1      | 3.411  | 37.09  |
| NXF2      | 2.947  | 0      |
| NXF3      | 1.896  | 0      |
| NXF4      | 25.344 | 0      |
| NXF5      | 2.691  | 0      |
| NXN       | 3.004  | 0.22   |
| NXPH1     | 5.842  | 0      |
| NXPH2     | 0.836  | 0      |
| NXPH3     | 1.918  | 8.74   |
| NXPH4     | 1.798  | 0      |
| NXT1      | 1.117  | 15.92  |
| NXT2      | 2.692  | 1.1    |
| NYD-SP18  | 3.436  | 0.08   |
| NYD-SP21  | 2.795  | 0.37   |
| NY-REN-7  | 1.966  | 0      |
| NY-SAR-48 | 1.549  | 3.04   |
| NYX       | 2.713  | 0      |
| OAF       | 1.862  | 7.6    |
| OAS1      | 2.564  | 4.83   |
| OAS2      | 6.919  | 11.85  |
| OAS3      | 6.627  | 7.88   |
| OASL      | 2.735  | 0.19   |
| OAT       | 1.998  | 12.73  |
| OATL3     | 0.46   | 0      |
| OAZ1      | 1.146  | 520.85 |
| OAZ2      | 1.905  | 34.18  |
| OAZ3      | 0.886  | 0.48   |
| OBFC1     | 1.42   | 12.75  |
| OBFC2A    | 1.865  | 1.4    |
| OBFC2B    | 1.301  | 19.42  |
| OBP2A     | 0.676  | 0      |
| OBP2B     | 0.689  | 0      |
| OBSCN     | 20.402 | 0.32   |
| OBSL1     | 6.766  | 0.26   |
| OC90      | 1.434  | 0      |
| OCA2      | 3.136  | 0.59   |

|         |        |       |
|---------|--------|-------|
| OCC-1   | 1.139  | 8.51  |
| OCEL1   | 1.091  | 5.95  |
| OCIAD1  | 1.389  | 32.44 |
| OCIAD2  | 0.942  | 5.18  |
| OCLM    | 0.884  | 0     |
| OCLN    | 5.278  | 0     |
| OCM     | 1.176  | 0     |
| OCRL    | 5.157  | 2.5   |
| ODAM    | 0.888  | 0     |
| ODC1    | 2.062  | 17.81 |
| ODF1    | 0.983  | 0     |
| ODF2    | 4.331  | 23.75 |
| ODF2L   | 2.53   | 2.46  |
| ODF3    | 1.284  | 0     |
| ODF3L1  | 1.193  | 0     |
| ODF4    | 1.149  | 0     |
| ODZ1    | 8.297  | 0     |
| ODZ2    | 9.964  | 0     |
| ODZ3    | 10.858 | 0     |
| ODZ4    | 1.419  | 0.06  |
| OFCC1   | 0.958  | 0     |
| OFD1    | 3.595  | 12.37 |
| OFD1P1  | 3.445  | 2.35  |
| OFDYP1  | 13.636 | 0     |
| OFDYP10 | 33.304 | 0     |
| OFDYP11 | 27.428 | 0     |
| OFDYP12 | 11.882 | 0     |
| OFDYP13 | 22.432 | 0     |
| OFDYP14 | 16.151 | 0     |
| OFDYP15 | 18.931 | 0     |
| OFDYP16 | 6.826  | 0     |
| OFDYP2  | 16.196 | 0     |
| OFDYP3  | 5.879  | 0     |
| OFDYP4  | 16.21  | 0     |
| OFDYP5  | 47.217 | 0     |
| OFDYP6  | 64.714 | 0     |
| OFDYP7  | 19.22  | 0     |
| OFDYP8  | 33.474 | 0     |
| OFDYP9  | 33.477 | 0     |
| OGDH    | 9.763  | 9.64  |
| OGDHL   | 3.682  | 0     |
| OGFOD1  | 3.02   | 11.91 |
| OGFOD2  | 2.08   | 5.79  |
| OGFR    | 2.42   | 30.5  |
| OGFRL1  | 1.996  | 8.18  |
| OGG1    | 7.329  | 3.71  |
| OGN     | 3.209  | 0     |
| OGT     | 6.328  | 32.08 |
| OIP5    | 2.63   | 15.09 |
| OIT3    | 2.361  | 0     |

|          |        |       |
|----------|--------|-------|
| OLAH     | 2.238  | 0.08  |
| OLFM1    | 3.687  | 0.04  |
| OLFM2    | 1.861  | 0.14  |
| OLFM3    | 3.217  | 0     |
| OLFM4    | 2.819  | 20.89 |
| OLFML1   | 2.706  | 0.03  |
| OLFML2A  | 6.443  | 42.21 |
| OLFML2B  | 3.16   | 1.36  |
| OLFML3   | 1.814  | 5.11  |
| OLIG1    | 2.154  | 0     |
| OLIG2    | 2.488  | 0     |
| OLIG3    | 2.196  | 0     |
| OLR1     | 2.462  | 0.03  |
| OMA1     | 1.909  | 3     |
| OMD      | 2.255  | 0     |
| OMG      | 1.87   | 0.49  |
| OMP      | 0.492  | 0     |
| ONECUT1  | 1.925  | 0     |
| ONECUT2  | 1.656  | 0     |
| ONECUT3  | 1.485  | 0     |
| OPA1     | 6.029  | 5.03  |
| OPA3     | 3.689  | 2.35  |
| OPCML    | 6.63   | 0     |
| OPHN1    | 7.35   | 0.6   |
| OPHN1P1  | 20.054 | 0     |
| OPLAH    | 3.92   | 0.03  |
| OPN1LW   | 1.223  | 0     |
| OPN1MW   | 1.095  | 0     |
| OPN1MW2  | 1.223  | 0     |
| OPN1SW   | 2.202  | 0.04  |
| OPN3     | 4.838  | 3.48  |
| OPN4     | 2.341  | 0.25  |
| OPN5     | 4.032  | 0     |
| OPRD1    | 1.774  | 0     |
| OPRK1    | 4.959  | 0     |
| OPRL1    | 3.359  | 3.41  |
| OPRM1    | 2.948  | 0     |
| OPRS1    | 2.809  | 11.85 |
| OPTC     | 1.444  | 0     |
| OPTN     | 3.608  | 19.35 |
| OR10A2   | 0.912  | 0     |
| OR10A3   | 0.945  | 0     |
| OR10A4   | 0.948  | 0     |
| OR10A5   | 0.954  | 0     |
| OR10A6   | 0.945  | 0     |
| OR10A7   | 0.951  | 0     |
| OR10AA1P | 0.934  | 0     |
| OR10AB1P | 0.938  | 0     |
| OR10AC1P | 2.758  | 0     |
| OR10AD1  | 0.954  | 0.18  |



|          |       |      |
|----------|-------|------|
| OR10AE1P | 0.598 | 0    |
| OR10AE3P | 0.469 | 0    |
| OR10AF1P | 0.805 | 0    |
| OR10AG1  | 0.906 | 0    |
| OR10AH1P | 1.998 | 0.04 |
| OR10AK1P | 0.415 | 0    |
| OR10B1P  | 2.235 | 0    |
| OR10C1   | 2.817 | 0    |
| OR10D1P  | 0.933 | 0    |
| OR10D3P  | 0.936 | 0    |
| OR10D4P  | 1.297 | 0    |
| OR10D5P  | 0.934 | 0    |
| OR10G1P  | 1.142 | 0    |
| OR10G2   | 0.933 | 0    |
| OR10G3   | 0.942 | 0    |
| OR10G4   | 0.936 | 0    |
| OR10G5P  | 0.705 | 0    |
| OR10G6   | 0.759 | 0    |
| OR10G7   | 0.936 | 0    |
| OR10G8   | 0.936 | 0    |
| OR10G9   | 0.936 | 0    |
| OR10H1   | 0.957 | 0    |
| OR10H2   | 0.948 | 0    |
| OR10H3   | 0.951 | 0    |
| OR10H4   | 0.951 | 0    |
| OR10H5   | 0.948 | 0    |
| OR10J1   | 0.963 | 0    |
| OR10J2P  | 0.958 | 0    |
| OR10J3   | 0.99  | 0    |
| OR10J4P  | 0.932 | 0    |
| OR10J5   | 0.93  | 0    |
| OR10J6P  | 0.927 | 0    |
| OR10J7P  | 0.973 | 0    |
| OR10J8P  | 0.926 | 0    |
| OR10J9P  | 0.987 | 0    |
| OR10K1   | 0.942 | 0    |
| OR10K2   | 0.939 | 0    |
| OR10N1P  | 0.923 | 0    |
| OR10P1   | 0.942 | 0    |
| OR10Q1   | 0.96  | 0    |
| OR10Q2P  | 0.943 | 0    |
| OR10R2   | 1.008 | 0    |
| OR10R3P  | 0.939 | 0    |
| OR10S1   | 0.996 | 0    |
| OR10T2   | 0.945 | 0    |
| OR10U1P  | 0.956 | 0    |
| OR10V1   | 0.93  | 0    |
| OR10V2P  | 0.764 | 0    |
| OR10V3P  | 0.725 | 0    |
| OR10W1   | 1.469 | 0    |

|          |       |      |
|----------|-------|------|
| OR10X1   | 0.981 | 0    |
| OR10Y1P  | 0.974 | 0    |
| OR10Z1   | 0.942 | 0    |
| OR11A1   | 6.687 | 0    |
| OR11G1P  | 0.951 | 0    |
| OR11G2   | 1.038 | 0    |
| OR11H1   | 0.981 | 0    |
| OR11H12  | 0.981 | 0    |
| OR11H13P | 0.93  | 0    |
| OR11H3P  | 0.947 | 0    |
| OR11H4   | 0.975 | 0    |
| OR11H5P  | 0.899 | 0    |
| OR11H6   | 0.993 | 0    |
| OR11H7P  | 0.942 | 0    |
| OR11H8P  | 1.381 | 0    |
| OR11I1P  | 0.944 | 0    |
| OR11J1P  | 0.96  | 0    |
| OR11J2P  | 0.946 | 0    |
| OR11J5P  | 0.96  | 0    |
| OR11K1P  | 0.929 | 0    |
| OR11K2P  | 0.948 | 0    |
| OR11L1   | 0.969 | 0    |
| OR11M1P  | 0.973 | 0    |
| OR11N1P  | 0.98  | 0    |
| OR11P1P  | 0.374 | 0    |
| OR11Q1P  | 0.949 | 0    |
| OR12D1P  | 2.796 | 0    |
| OR12D2   | 1.848 | 0    |
| OR12D3   | 3.738 | 0    |
| OR13A1   | 2.078 | 0    |
| OR13C1P  | 0.954 | 0    |
| OR13C2   | 0.957 | 0    |
| OR13C3   | 1.044 | 0    |
| OR13C4   | 0.957 | 0    |
| OR13C5   | 0.957 | 0    |
| OR13C6P  | 0.947 | 0    |
| OR13C7P  | 0.956 | 0    |
| OR13C8   | 0.963 | 0    |
| OR13C9   | 0.957 | 0    |
| OR13D1   | 1.041 | 0    |
| OR13D2P  | 0.934 | 0    |
| OR13D3P  | 0.934 | 0.18 |
| OR13E1P  | 0.956 | 0    |
| OR13F1   | 0.96  | 0    |
| OR13G1   | 0.924 | 0    |
| OR13H1   | 0.927 | 0    |
| OR13I1P  | 1.265 | 0    |
| OR13J1   | 0.939 | 0    |
| OR13K1P  | 1.084 | 0    |
| OR13Z1P  | 0.893 | 0    |

|         |       |      |
|---------|-------|------|
| OR13Z2P | 0.556 | 0    |
| OR1A1   | 0.93  | 0    |
| OR1A2   | 0.93  | 0    |
| OR1AA1P | 0.941 | 0    |
| OR1AB1P | 0.739 | 0    |
| OR1B1   | 0.957 | 0    |
| OR1C1   | 1.143 | 0    |
| OR1D2   | 0.939 | 0    |
| OR1D3P  | 0.641 | 0    |
| OR1D4   | 0.939 | 0    |
| OR1E1   | 0.945 | 0    |
| OR1E2   | 0.972 | 0    |
| OR1E3P  | 0.948 | 0    |
| OR1F1   | 0.939 | 0    |
| OR1F12P | 1.414 | 0    |
| OR1F2   | 0.985 | 0.17 |
| OR1G1   | 0.942 | 0    |
| OR1H1P  | 0.934 | 0    |
| OR1I1   | 1.068 | 0    |
| OR1J1   | 0.969 | 0    |
| OR1J2   | 0.942 | 0    |
| OR1J4   | 0.942 | 0    |
| OR1K1   | 0.951 | 0.08 |
| OR1L1   | 1.083 | 0    |
| OR1L3   | 0.975 | 0    |
| OR1L4   | 0.936 | 0    |
| OR1L6   | 1.044 | 0    |
| OR1L8   | 0.93  | 0.09 |
| OR1M1   | 0.942 | 0    |
| OR1M4P  | 0.463 | 0    |
| OR1N1   | 0.936 | 0    |
| OR1N2   | 0.993 | 0    |
| OR1P1P  | 0.993 | 0    |
| OR1Q1   | 0.945 | 0    |
| OR1R1P  | 1.029 | 0    |
| OR1S1   | 0.978 | 0    |
| OR1S2   | 0.978 | 0    |
| OR1X1P  | 1.245 | 0    |
| OR1X5P  | 1.252 | 0    |
| OR2A1   | 1.866 | 0    |
| OR2A12  | 1.866 | 0    |
| OR2A13P | 2.414 | 0.03 |
| OR2A14  | 1.863 | 0    |
| OR2A15P | 1.794 | 0    |
| OR2A2   | 1.914 | 0    |
| OR2A20P | 2.063 | 0    |
| OR2A25  | 1.866 | 0    |
| OR2A3P  | 2.667 | 0    |
| OR2A4   | 0.933 | 0.36 |
| OR2A41P | 0.924 | 0    |

|         |       |      |
|---------|-------|------|
| OR2A42  | 1.83  | 0    |
| OR2A5   | 1.872 | 0    |
| OR2A7   | 1.866 | 0.22 |
| OR2A9P  | 2.118 | 2.43 |
| OR2AD1P | 2.784 | 0    |
| OR2AE1  | 1.944 | 0.52 |
| OR2AF1P | 0.89  | 0    |
| OR2AG1  | 0.951 | 0    |
| OR2AG2  | 0.951 | 0    |
| OR2AH1P | 0.925 | 0    |
| OR2AI1P | 0.929 | 0    |
| OR2AJ1  | 0.943 | 0    |
| OR2AK2  | 1.008 | 0    |
| OR2AL1P | 0.737 | 0    |
| OR2AM1P | 0.405 | 0    |
| OR2AO1P | 1.555 | 0    |
| OR2AP1  | 0.927 | 0    |
| OR2AQ1P | 0.241 | 0    |
| OR2AS1P | 0.482 | 0    |
| OR2AS2P | 0.35  | 0    |
| OR2AT1P | 0.77  | 0    |
| OR2AT2P | 0.972 | 0    |
| OR2AT4  | 0.963 | 0    |
| OR2B11  | 0.954 | 0    |
| OR2B2   | 1.074 | 0.08 |
| OR2B3   | 2.826 | 0    |
| OR2B4P  | 1.91  | 0.35 |
| OR2B6   | 0.942 | 1.07 |
| OR2B7P  | 0.935 | 0    |
| OR2B8P  | 0.938 | 0    |
| OR2BH1P | 0.864 | 0    |
| OR2C1   | 0.939 | 0    |
| OR2C3   | 2.742 | 0    |
| OR2D2   | 0.927 | 0    |
| OR2D3   | 0.993 | 0    |
| OR2E1P  | 0.628 | 0    |
| OR2F1   | 2.178 | 0    |
| OR2F2   | 1.908 | 0    |
| OR2G1P  | 2.973 | 0    |
| OR2G2   | 0.954 | 0    |
| OR2G3   | 0.93  | 0    |
| OR2G6   | 0.951 | 0    |
| OR2H1   | 8.988 | 0    |
| OR2H2   | 3.189 | 0    |
| OR2H4P  | 2.823 | 0    |
| OR2H5P  | 1.734 | 0    |
| OR2I1P  | 3.177 | 0    |
| OR2J1   | 2.808 | 0    |
| OR2J2   | 2.817 | 0    |
| OR2J3   | 2.808 | 0    |

|         |       |      |
|---------|-------|------|
| OR2J4P  | 2.799 | 0    |
| OR2K2   | 0.951 | 0    |
| OR2L13  | 1.884 | 0    |
| OR2L1P  | 0.925 | 0    |
| OR2L2   | 1.134 | 0    |
| OR2L3   | 0.939 | 0    |
| OR2L5   | 0.936 | 0    |
| OR2L6P  | 0.936 | 0    |
| OR2L8   | 0.939 | 0    |
| OR2L9P  | 0.934 | 0    |
| OR2M1P  | 0.645 | 0    |
| OR2M2   | 1.044 | 0    |
| OR2M3   | 0.939 | 0    |
| OR2M4   | 0.936 | 0    |
| OR2M5   | 0.939 | 0    |
| OR2M7   | 0.939 | 0    |
| OR2N1P  | 2.841 | 0    |
| OR2P1P  | 2.205 | 0    |
| OR2Q1P  | 1.856 | 2.77 |
| OR2R1P  | 2.7   | 0    |
| OR2S1P  | 0.947 | 0    |
| OR2S2   | 0.93  | 0    |
| OR2T1   | 1.11  | 0    |
| OR2T10  | 0.939 | 0    |
| OR2T11  | 0.951 | 0    |
| OR2T12  | 0.963 | 0    |
| OR2T2   | 0.975 | 0    |
| OR2T27  | 0.954 | 0    |
| OR2T29  | 0.93  | 0    |
| OR2T3   | 0.957 | 0    |
| OR2T32P | 0.961 | 0    |
| OR2T33  | 0.963 | 0    |
| OR2T34  | 0.957 | 0    |
| OR2T35  | 0.972 | 0    |
| OR2T4   | 1.047 | 0    |
| OR2T5   | 0.948 | 0    |
| OR2T6   | 0.927 | 0    |
| OR2T7   | 0.924 | 0    |
| OR2T8   | 0.939 | 0    |
| OR2U2P  | 1.914 | 0    |
| OR2V1   | 0.945 | 0    |
| OR2V2   | 0.948 | 0    |
| OR2W1   | 2.949 | 0    |
| OR2W2P  | 0.948 | 0    |
| OR2W3   | 0.945 | 0.44 |
| OR2W4P  | 0.923 | 0    |
| OR2W5   | 0.963 | 0    |
| OR2W6P  | 0.998 | 0.25 |
| OR2X1P  | 0.745 | 0    |
| OR2Y1   | 0.936 | 0    |

|         |       |   |
|---------|-------|---|
| OR2Z1   | 0.945 | 0 |
| OR3A1   | 0.948 | 0 |
| OR3A2   | 1.085 | 0 |
| OR3A3   | 0.966 | 0 |
| OR3A4   | 1.047 | 0 |
| OR3B1P  | 0.929 | 0 |
| OR3D1P  | 0.936 | 0 |
| OR4A10P | 0.411 | 0 |
| OR4A11P | 0.918 | 0 |
| OR4A12P | 0.945 | 0 |
| OR4A13P | 0.942 | 0 |
| OR4A14P | 0.959 | 0 |
| OR4A15  | 1.035 | 0 |
| OR4A16  | 0.987 | 0 |
| OR4A17P | 0.904 | 0 |
| OR4A18P | 0.888 | 0 |
| OR4A19P | 0.903 | 0 |
| OR4A1P  | 0.909 | 0 |
| OR4A21P | 0.99  | 0 |
| OR4A2P  | 0.913 | 0 |
| OR4A3P  | 0.871 | 0 |
| OR4A40P | 0.944 | 0 |
| OR4A41P | 0.952 | 0 |
| OR4A42P | 0.934 | 0 |
| OR4A43P | 0.911 | 0 |
| OR4A44P | 0.981 | 0 |
| OR4A45P | 0.916 | 0 |
| OR4A46P | 0.941 | 0 |
| OR4A47  | 0.93  | 0 |
| OR4A48P | 0.774 | 0 |
| OR4A49P | 0.432 | 0 |
| OR4A4P  | 0.927 | 0 |
| OR4A5   | 0.948 | 0 |
| OR4A50P | 0.486 | 0 |
| OR4A6P  | 0.97  | 0 |
| OR4A7P  | 0.91  | 0 |
| OR4A8P  | 0.945 | 0 |
| OR4A9P  | 0.944 | 0 |
| OR4B1   | 0.93  | 0 |
| OR4B2P  | 0.903 | 0 |
| OR4C10P | 0.946 | 0 |
| OR4C11  | 0.933 | 0 |
| OR4C12  | 0.93  | 0 |
| OR4C13  | 0.93  | 0 |
| OR4C14P | 0.923 | 0 |
| OR4C15  | 1.113 | 0 |
| OR4C16  | 0.933 | 0 |
| OR4C1P  | 0.925 | 0 |
| OR4C2P  | 1.037 | 0 |
| OR4C3   | 0.99  | 0 |

|         |       |      |
|---------|-------|------|
| OR4C46  | 0.93  | 0    |
| OR4C4P  | 7.15  | 0    |
| OR4C5   | 0.792 | 0    |
| OR4C50P | 0.927 | 0    |
| OR4C6   | 0.93  | 0    |
| OR4C7P  | 0.925 | 0    |
| OR4C9P  | 0.925 | 0    |
| OR4D1   | 0.933 | 0    |
| OR4D10  | 0.936 | 0    |
| OR4D11  | 0.936 | 0    |
| OR4D12P | 1.025 | 0    |
| OR4D2   | 1.927 | 0    |
| OR4D5   | 0.957 | 0    |
| OR4D6   | 0.945 | 0    |
| OR4D7P  | 1.014 | 0.17 |
| OR4D8P  | 0.959 | 0    |
| OR4D9   | 0.945 | 0    |
| OR4E1P  | 1.147 | 0    |
| OR4E2   | 0.942 | 0    |
| OR4F13P | 0.937 | 0    |
| OR4F14P | 0.936 | 0    |
| OR4F15  | 0.939 | 0    |
| OR4F16  | 1.738 | 0    |
| OR4F17  | 0.918 | 0    |
| OR4F1P  | 0.935 | 0    |
| OR4F21  | 0.939 | 0    |
| OR4F28P | 0.935 | 0    |
| OR4F29  | 1.738 | 0    |
| OR4F4   | 0.918 | 0    |
| OR4F5   | 0.918 | 0    |
| OR4F6   | 0.939 | 0    |
| OR4F7P  | 0.923 | 0    |
| OR4F8P  | 0.935 | 0    |
| OR4G11P | 0.87  | 0    |
| OR4G1P  | 0.869 | 0    |
| OR4G2P  | 0.576 | 0    |
| OR4G3P  | 0.864 | 0    |
| OR4G4P  | 0.944 | 0    |
| OR4G6P  | 0.944 | 0    |
| OR4H12P | 0.879 | 0    |
| OR4H6P  | 0.637 | 0    |
| OR4K1   | 0.936 | 0    |
| OR4K11P | 0.955 | 0    |
| OR4K12P | 0.933 | 0    |
| OR4K13  | 0.915 | 0    |
| OR4K14  | 0.933 | 0    |
| OR4K15  | 1.047 | 0    |
| OR4K16P | 1.008 | 0    |
| OR4K17  | 1.032 | 0    |
| OR4K2   | 0.945 | 0    |

|          |       |   |
|----------|-------|---|
| OR4K3P   | 1.347 | 0 |
| OR4K4P   | 0.933 | 0 |
| OR4K5    | 0.972 | 0 |
| OR4K6P   | 0.939 | 0 |
| OR4K7P   | 0.873 | 0 |
| OR4K8P   | 0.972 | 0 |
| OR4L1    | 0.939 | 0 |
| OR4M1    | 0.942 | 0 |
| OR4M2    | 0.942 | 0 |
| OR4N1P   | 0.949 | 0 |
| OR4N2    | 0.924 | 0 |
| OR4N3P   | 0.924 | 0 |
| OR4N4    | 0.951 | 0 |
| OR4N5    | 0.927 | 0 |
| OR4P1P   | 0.936 | 0 |
| OR4P4    | 0.939 | 0 |
| OR4Q1P   | 0.981 | 0 |
| OR4Q2P   | 0.931 | 0 |
| OR4Q3    | 0.942 | 0 |
| OR4R1P   | 0.846 | 0 |
| OR4R2P   | 0.857 | 0 |
| OR4R3P   | 0.838 | 0 |
| OR4S1    | 0.93  | 0 |
| OR4S2    | 0.936 | 0 |
| OR4T1P   | 0.921 | 0 |
| OR4U1P   | 0.94  | 0 |
| OR4V1P   | 0.94  | 0 |
| OR4W1P   | 0.348 | 0 |
| OR4X1    | 0.918 | 0 |
| OR4X2    | 0.912 | 0 |
| OR51A10P | 0.856 | 0 |
| OR51A1P  | 1.066 | 0 |
| OR51A2   | 0.942 | 0 |
| OR51A3P  | 0.957 | 0 |
| OR51A4   | 0.942 | 0 |
| OR51A5P  | 0.966 | 0 |
| OR51A6P  | 1.019 | 0 |
| OR51A7   | 0.939 | 0 |
| OR51A8P  | 0.937 | 0 |
| OR51A9P  | 0.899 | 0 |
| OR51B2   | 0.939 | 0 |
| OR51B3P  | 0.949 | 0 |
| OR51B4   | 0.933 | 0 |
| OR51B5   | 0.939 | 0 |
| OR51B6   | 0.939 | 0 |
| OR51B8P  | 0.758 | 0 |
| OR51C1P  | 0.942 | 0 |
| OR51C4P  | 0.948 | 0 |
| OR51D1   | 0.975 | 0 |
| OR51E1   | 1.35  | 0 |



|         |       |      |
|---------|-------|------|
| OR51E2  | 2.781 | 0    |
| OR51F1  | 0.939 | 0    |
| OR51F2  | 1.029 | 0    |
| OR51F3P | 0.901 | 0    |
| OR51F4P | 0.899 | 0    |
| OR51F5P | 0.942 | 0    |
| OR51G1  | 0.966 | 0    |
| OR51G2  | 0.945 | 0    |
| OR51H1P | 0.945 | 0    |
| OR51H2P | 0.947 | 0    |
| OR51I1  | 0.945 | 0    |
| OR51I2  | 0.939 | 0    |
| OR51J1  | 0.975 | 0    |
| OR51K1P | 0.947 | 0    |
| OR51L1  | 0.948 | 0    |
| OR51M1  | 0.981 | 0    |
| OR51N1P | 0.949 | 0    |
| OR51P1P | 0.952 | 0    |
| OR51Q1  | 0.954 | 0    |
| OR51R1P | 0.949 | 0    |
| OR51S1  | 0.972 | 0    |
| OR51T1  | 1.065 | 0    |
| OR51V1  | 0.966 | 0    |
| OR52A1  | 0.939 | 0    |
| OR52A4  | 0.915 | 0    |
| OR52A5  | 0.951 | 0    |
| OR52B1P | 0.955 | 0    |
| OR52B2  | 0.972 | 0    |
| OR52B3P | 0.943 | 0    |
| OR52B4  | 0.945 | 0    |
| OR52B5P | 0.945 | 0    |
| OR52B6  | 1.008 | 0.08 |
| OR52D1  | 0.957 | 0    |
| OR52E1P | 0.923 | 0    |
| OR52E2  | 0.978 | 0    |
| OR52E3P | 0.975 | 0    |
| OR52E4  | 0.939 | 0    |
| OR52E5  | 0.948 | 0    |
| OR52E6  | 0.942 | 0    |
| OR52E7P | 0.929 | 0    |
| OR52E8  | 0.954 | 0    |
| OR52H1  | 0.963 | 0    |
| OR52H2P | 0.932 | 0    |
| OR52I1  | 0.975 | 0    |
| OR52I2  | 1.053 | 0    |
| OR52J1P | 0.87  | 0    |
| OR52J2P | 0.963 | 0    |
| OR52J3  | 0.936 | 0    |
| OR52K1  | 0.945 | 0    |
| OR52K2  | 0.945 | 0    |

|         |       |      |
|---------|-------|------|
| OR52K3P | 0.947 | 0    |
| OR52L1  | 0.99  | 0    |
| OR52L2P | 0.912 | 0    |
| OR52M1  | 0.954 | 0    |
| OR52M2P | 0.98  | 0    |
| OR52N1  | 0.963 | 0    |
| OR52N2  | 0.966 | 0    |
| OR52N3P | 0.958 | 0    |
| OR52N4  | 0.966 | 0    |
| OR52N5  | 0.975 | 0    |
| OR52P1P | 0.96  | 0    |
| OR52P2P | 0.897 | 0    |
| OR52Q1P | 0.844 | 0    |
| OR52R1  | 1.185 | 0    |
| OR52S1P | 0.955 | 0    |
| OR52T1P | 0.966 | 0    |
| OR52U1P | 0.977 | 0    |
| OR52V1P | 0.904 | 0    |
| OR52W1  | 0.963 | 0    |
| OR52X1P | 0.98  | 0    |
| OR52Y1P | 0.494 | 0    |
| OR52Z1P | 0.891 | 0    |
| OR55B1P | 0.98  | 0    |
| OR56A1  | 0.957 | 0    |
| OR56A3  | 0.721 | 0    |
| OR56A4  | 1.098 | 0    |
| OR56A7P | 0.938 | 0    |
| OR56B1  | 0.975 | 0    |
| OR56B2P | 0.885 | 0    |
| OR56B3P | 0.944 | 0    |
| OR56B4  | 0.96  | 0.26 |
| OR5A1   | 0.948 | 0    |
| OR5A2   | 0.975 | 0    |
| OR5AC1P | 0.922 | 0    |
| OR5AC2  | 0.93  | 0    |
| OR5AC4P | 0.916 | 0    |
| OR5AH1P | 0.369 | 0    |
| OR5AK1P | 0.928 | 0    |
| OR5AK2  | 0.93  | 0    |
| OR5AK3P | 0.927 | 0    |
| OR5AK4P | 0.928 | 0    |
| OR5AL1P | 0.985 | 0    |
| OR5AL2P | 0.92  | 0    |
| OR5AM1P | 1.065 | 0    |
| OR5AN1  | 0.936 | 0    |
| OR5AN2P | 0.947 | 0    |
| OR5AO1P | 0.331 | 0    |
| OR5AP1P | 0.94  | 0    |
| OR5AP2  | 0.951 | 0    |
| OR5AQ1P | 0.936 | 0    |

|         |       |   |
|---------|-------|---|
| OR5AR1  | 0.933 | 0 |
| OR5AS1  | 0.975 | 0 |
| OR5AT1  | 0.93  | 0 |
| OR5AU1  | 1.089 | 0 |
| OR5AV1P | 0.879 | 0 |
| OR5AW1P | 0.924 | 0 |
| OR5AX1  | 1.345 | 0 |
| OR5AY1  | 0.949 | 0 |
| OR5AZ1P | 0.929 | 0 |
| OR5B10P | 0.654 | 0 |
| OR5B12  | 0.945 | 0 |
| OR5B15P | 0.916 | 0 |
| OR5B17  | 0.945 | 0 |
| OR5B19P | 0.858 | 0 |
| OR5B1P  | 0.648 | 0 |
| OR5B2   | 0.93  | 0 |
| OR5B21  | 0.93  | 0 |
| OR5B3   | 0.945 | 0 |
| OR5BA1P | 0.979 | 0 |
| OR5BB1P | 0.939 | 0 |
| OR5BC1P | 0.834 | 0 |
| OR5BD1P | 0.827 | 0 |
| OR5BE1P | 0.936 | 0 |
| OR5BF1  | 0.939 | 0 |
| OR5BH1P | 0.909 | 0 |
| OR5BJ1P | 0.904 | 0 |
| OR5BK1P | 0.887 | 0 |
| OR5BL1P | 0.633 | 0 |
| OR5BM1P | 0.926 | 0 |
| OR5BN1P | 0.829 | 0 |
| OR5BN2P | 0.618 | 0 |
| OR5BP1P | 0.434 | 0 |
| OR5BQ1P | 0.336 | 0 |
| OR5BR1P | 1.33  | 0 |
| OR5BS1P | 0.933 | 0 |
| OR5BT1P | 0.955 | 0 |
| OR5BU1  | 0.936 | 0 |
| OR5C1   | 0.963 | 0 |
| OR5D13  | 0.945 | 0 |
| OR5D14  | 0.945 | 0 |
| OR5D15P | 0.942 | 0 |
| OR5D16  | 0.987 | 0 |
| OR5D17P | 0.978 | 0 |
| OR5D18  | 0.942 | 0 |
| OR5D2P  | 0.637 | 0 |
| OR5D3P  | 0.649 | 0 |
| OR5E1P  | 0.933 | 0 |
| OR5F1   | 0.945 | 0 |
| OR5F2P  | 0.941 | 0 |
| OR5G1P  | 0.921 | 0 |

|         |       |   |
|---------|-------|---|
| OR5G3P  | 0.968 | 0 |
| OR5G4P  | 0.981 | 0 |
| OR5G5P  | 0.936 | 0 |
| OR5H1   | 0.942 | 0 |
| OR5H14  | 0.933 | 0 |
| OR5H15  | 0.942 | 0 |
| OR5H2   | 0.945 | 0 |
| OR5H3P  | 0.916 | 0 |
| OR5H4P  | 0.928 | 0 |
| OR5H5P  | 0.925 | 0 |
| OR5H6   | 0.978 | 0 |
| OR5H7P  | 0.927 | 0 |
| OR5H8P  | 0.928 | 0 |
| OR5I1   | 0.945 | 0 |
| OR5J1P  | 0.936 | 0 |
| OR5J2   | 0.939 | 0 |
| OR5J7P  | 0.422 | 0 |
| OR5K1   | 0.952 | 0 |
| OR5K2   | 0.951 | 0 |
| OR5K3   | 0.966 | 0 |
| OR5K4   | 0.966 | 0 |
| OR5L1   | 0.936 | 0 |
| OR5L2   | 0.936 | 0 |
| OR5M1   | 0.948 | 0 |
| OR5M10  | 0.948 | 0 |
| OR5M11  | 0.918 | 0 |
| OR5M12P | 0.968 | 0 |
| OR5M13P | 0.488 | 0 |
| OR5M14P | 0.354 | 0 |
| OR5M2P  | 0.936 | 0 |
| OR5M3   | 0.924 | 0 |
| OR5M4P  | 0.925 | 0 |
| OR5M5P  | 0.936 | 0 |
| OR5M6P  | 0.937 | 0 |
| OR5M7P  | 0.972 | 0 |
| OR5M8   | 0.936 | 0 |
| OR5M9   | 0.933 | 0 |
| OR5P1P  | 0.922 | 0 |
| OR5P2   | 0.969 | 0 |
| OR5P3   | 0.936 | 0 |
| OR5P4P  | 0.92  | 0 |
| OR5R1   | 0.975 | 0 |
| OR5S1P  | 0.948 | 0 |
| OR5T1   | 0.981 | 0 |
| OR5T2   | 1.08  | 0 |
| OR5T3   | 1.023 | 0 |
| OR5U1   | 1.932 | 0 |
| OR5V1   | 2.096 | 0 |
| OR5W1P  | 0.803 | 0 |
| OR5W2   | 0.933 | 0 |

|         |       |      |
|---------|-------|------|
| OR6A2   | 1.384 | 0    |
| OR6B1   | 1.872 | 0    |
| OR6B2   | 0.939 | 0    |
| OR6B3   | 0.996 | 0    |
| OR6C1   | 0.939 | 0    |
| OR6C2   | 0.939 | 0    |
| OR6C3   | 0.936 | 0    |
| OR6C4   | 0.93  | 0    |
| OR6C5P  | 0.923 | 0    |
| OR6C6   | 0.945 | 0    |
| OR6C64P | 0.879 | 0    |
| OR6C65  | 0.939 | 0    |
| OR6C66P | 0.933 | 0    |
| OR6C68  | 0.954 | 0    |
| OR6C69P | 0.896 | 0    |
| OR6C70  | 0.939 | 0    |
| OR6C71P | 0.936 | 0    |
| OR6C72P | 0.934 | 0    |
| OR6C73P | 0.998 | 0    |
| OR6C74  | 0.939 | 0    |
| OR6C75  | 0.939 | 0    |
| OR6C76  | 0.939 | 0    |
| OR6C7P  | 0.939 | 0    |
| OR6D1P  | 0.813 | 0    |
| OR6E1P  | 0.926 | 0.18 |
| OR6F1   | 0.927 | 0    |
| OR6J1   | 0.888 | 0    |
| OR6K1P  | 0.971 | 0    |
| OR6K2   | 0.975 | 0    |
| OR6K3   | 0.996 | 0    |
| OR6K4P  | 0.882 | 0    |
| OR6K5P  | 0.848 | 0    |
| OR6K6   | 1.032 | 0    |
| OR6L1P  | 0.88  | 0    |
| OR6L2P  | 0.925 | 0    |
| OR6M1   | 0.942 | 0    |
| OR6M2P  | 0.946 | 0    |
| OR6M3P  | 0.843 | 0    |
| OR6N1   | 0.939 | 0    |
| OR6N2   | 0.954 | 0    |
| OR6P1   | 0.951 | 0    |
| OR6Q1   | 0.954 | 0    |
| OR6R1P  | 0.929 | 0    |
| OR6R2P  | 0.811 | 0    |
| OR6S1   | 0.996 | 0    |
| OR6T1   | 0.972 | 0    |
| OR6U2P  | 0.932 | 0    |
| OR6V1   | 1.884 | 0    |
| OR6W1P  | 3.004 | 0    |
| OR6X1   | 0.939 | 0    |

|          |       |      |
|----------|-------|------|
| OR6Y1    | 0.978 | 0    |
| OR7A10   | 0.93  | 0    |
| OR7A11P  | 0.989 | 0    |
| OR7A15P  | 0.649 | 0    |
| OR7A17   | 0.93  | 0    |
| OR7A18P  | 0.427 | 0    |
| OR7A19P  | 0.733 | 0    |
| OR7A1P   | 0.946 | 0    |
| OR7A2P   | 1.677 | 0    |
| OR7A3P   | 0.646 | 0    |
| OR7A5    | 2.138 | 3.35 |
| OR7A8P   | 0.633 | 0    |
| OR7C1    | 0.963 | 2.8  |
| OR7C2    | 0.96  | 0    |
| OR7D1P   | 0.649 | 0    |
| OR7D2    | 3.224 | 0    |
| OR7D4    | 0.939 | 0    |
| OR7E100P | 1.015 | 0    |
| OR7E101P | 0.674 | 0    |
| OR7E102P | 0.996 | 0    |
| OR7E104P | 0.746 | 0    |
| OR7E105P | 0.996 | 0    |
| OR7E106P | 0.947 | 0    |
| OR7E108P | 1.024 | 0    |
| OR7E109P | 0.947 | 0    |
| OR7E10P  | 0.987 | 0    |
| OR7E110P | 0.596 | 0    |
| OR7E111P | 0.981 | 0    |
| OR7E115P | 0.939 | 0    |
| OR7E116P | 1.026 | 0    |
| OR7E117P | 1.026 | 0    |
| OR7E11P  | 0.663 | 0    |
| OR7E121P | 1.023 | 0    |
| OR7E122P | 0.921 | 0    |
| OR7E125P | 0.969 | 0    |
| OR7E126P | 1.419 | 0.36 |
| OR7E128P | 1.032 | 0.08 |
| OR7E129P | 1.025 | 0    |
| OR7E12P  | 0.934 | 0    |
| OR7E130P | 0.963 | 0    |
| OR7E136P | 1.934 | 0    |
| OR7E13P  | 0.653 | 0    |
| OR7E140P | 0.996 | 0    |
| OR7E145P | 1.026 | 0    |
| OR7E148P | 0.953 | 0    |
| OR7E149P | 0.981 | 0    |
| OR7E14P  | 0.652 | 0    |
| OR7E155P | 1.026 | 0    |
| OR7E156P | 7.703 | 0    |
| OR7E157P | 0.969 | 0    |

|          |       |      |
|----------|-------|------|
| OR7E158P | 0.9   | 0    |
| OR7E159P | 0.309 | 0    |
| OR7E15P  | 0.656 | 0    |
| OR7E160P | 0.1   | 0    |
| OR7E161P | 0.996 | 0    |
| OR7E162P | 1.035 | 0    |
| OR7E16P  | 0.648 | 0    |
| OR7E18P  | 0.821 | 0    |
| OR7E19P  | 0.977 | 0    |
| OR7E1P   | 1.023 | 0    |
| OR7E21P  | 1.054 | 0    |
| OR7E22P  | 1.026 | 0    |
| OR7E23P  | 0.983 | 0.17 |
| OR7E24   | 1.017 | 0    |
| OR7E25P  | 0.981 | 0    |
| OR7E26P  | 0.654 | 0    |
| OR7E28P  | 0.947 | 0    |
| OR7E29P  | 0.945 | 0    |
| OR7E2P   | 0.807 | 0    |
| OR7E31P  | 0.657 | 0    |
| OR7E33P  | 1.008 | 0    |
| OR7E35P  | 0.914 | 0    |
| OR7E36P  | 0.995 | 0.08 |
| OR7E37P  | 0.664 | 0.13 |
| OR7E38P  | 1.973 | 0.34 |
| OR7E39P  | 1.944 | 0    |
| OR7E41P  | 0.643 | 0    |
| OR7E43P  | 0.652 | 0    |
| OR7E46P  | 0.945 | 0    |
| OR7E47P  | 0.946 | 0.26 |
| OR7E4P   | 0.921 | 0    |
| OR7E53P  | 0.655 | 0    |
| OR7E55P  | 0.951 | 0    |
| OR7E59P  | 1.918 | 0    |
| OR7E5P   | 0.651 | 0    |
| OR7E62P  | 0.646 | 0    |
| OR7E66P  | 0.522 | 0    |
| OR7E7P   | 2.014 | 0    |
| OR7E83P  | 0.965 | 0    |
| OR7E84P  | 1.027 | 0    |
| OR7E85P  | 1.028 | 0    |
| OR7E86P  | 1.023 | 0    |
| OR7E87P  | 0.648 | 0    |
| OR7E89P  | 0.969 | 0    |
| OR7E8P   | 1.026 | 0    |
| OR7E90P  | 0.974 | 0    |
| OR7E91P  | 7.092 | 0    |
| OR7E93P  | 0.971 | 0    |
| OR7E94P  | 0.33  | 0    |
| OR7E96P  | 0.969 | 0    |

|         |       |   |
|---------|-------|---|
| OR7E97P | 0.971 | 0 |
| OR7E99P | 1.025 | 0 |
| OR7G1   | 1.002 | 0 |
| OR7G15P | 0.404 | 0 |
| OR7G2   | 1.038 | 0 |
| OR7G3   | 0.939 | 0 |
| OR7H1P  | 0.937 | 0 |
| OR7H2P  | 0.898 | 0 |
| OR7K1P  | 1.004 | 0 |
| OR7L1P  | 1.083 | 0 |
| OR7M1P  | 0.55  | 0 |
| OR8A1   | 0.981 | 0 |
| OR8A2P  | 0.963 | 0 |
| OR8A3P  | 0.379 | 0 |
| OR8B10P | 0.933 | 0 |
| OR8B12  | 0.933 | 0 |
| OR8B1P  | 0.973 | 0 |
| OR8B2   | 0.942 | 0 |
| OR8B3   | 0.942 | 0 |
| OR8B4   | 0.93  | 0 |
| OR8B5P  | 0.803 | 0 |
| OR8B6P  | 0.901 | 0 |
| OR8B7P  | 0.619 | 0 |
| OR8B8   | 0.936 | 0 |
| OR8B9P  | 0.485 | 0 |
| OR8C1P  | 0.675 | 0 |
| OR8D1   | 0.927 | 0 |
| OR8D2   | 0.936 | 0 |
| OR8D4   | 0.945 | 0 |
| OR8F1P  | 0.963 | 0 |
| OR8G1   | 0.865 | 0 |
| OR8G2   | 0.915 | 0 |
| OR8G3P  | 0.465 | 0 |
| OR8G5   | 1.041 | 0 |
| OR8G7P  | 1.197 | 0 |
| OR8H1   | 0.936 | 0 |
| OR8H2   | 0.939 | 0 |
| OR8H3   | 0.939 | 0 |
| OR8I1P  | 0.931 | 0 |
| OR8I2   | 0.933 | 0 |
| OR8I4P  | 0.141 | 0 |
| OR8J1   | 0.951 | 0 |
| OR8J2P  | 0.965 | 0 |
| OR8J3   | 0.948 | 0 |
| OR8K1   | 0.96  | 0 |
| OR8K2P  | 0.927 | 0 |
| OR8K3   | 0.939 | 0 |
| OR8K4P  | 0.872 | 0 |
| OR8K5   | 0.924 | 0 |
| OR8L1P  | 0.955 | 0 |



|         |        |       |
|---------|--------|-------|
| OR8Q1P  | 0.657  | 0     |
| OR8R1P  | 0.554  | 0     |
| OR8S1   | 1.08   | 0     |
| OR8T1P  | 0.915  | 0     |
| OR8U8   | 0.96   | 0     |
| OR8V1P  | 0.921  | 0     |
| OR8X1P  | 0.869  | 0     |
| OR9A1P  | 1.578  | 0     |
| OR9A2   | 1.866  | 0     |
| OR9A3P  | 1.92   | 0     |
| OR9A4   | 1.89   | 0.04  |
| OR9G1   | 0.918  | 0     |
| OR9G2P  | 0.988  | 0     |
| OR9G3P  | 0.914  | 0     |
| OR9G4   | 0.984  | 0     |
| OR9H1P  | 0.924  | 0     |
| OR9I1   | 0.945  | 0     |
| OR9I2P  | 0.486  | 0     |
| OR9I3P  | 0.942  | 0     |
| OR9K1P  | 0.939  | 0     |
| OR9K2   | 1.008  | 0     |
| OR9L1P  | 1.257  | 0     |
| OR9M1P  | 0.93   | 0     |
| OR9N1P  | 1.242  | 0     |
| OR9P1P  | 1.412  | 0     |
| OR9Q1   | 2.459  | 0     |
| OR9Q2   | 0.945  | 0     |
| OR9R1P  | 0.954  | 0     |
| ORAOV1  | 2.528  | 3.3   |
| ORC1L   | 3.157  | 2.96  |
| ORC2L   | 3.121  | 5.83  |
| ORC3L   | 2.588  | 2.77  |
| ORC4L   | 3.056  | 2.84  |
| ORC5L   | 4.552  | 1.89  |
| ORC6L   | 1.628  | 1.91  |
| ORM1    | 0.804  | 0.52  |
| ORM2    | 1.068  | 3.79  |
| ORMDL1  | 2.016  | 12.49 |
| ORMDL2  | 1.244  | 15.85 |
| ORMDL3  | 2.109  | 69.1  |
| OS9     | 2.942  | 89.13 |
| OSAP    | 1.217  | 0.48  |
| OSBP    | 5.083  | 9.4   |
| OSBP2   | 4.34   | 1.63  |
| OSBPL10 | 3.923  | 11.46 |
| OSBPL11 | 4.196  | 3.45  |
| OSBPL1A | 5.141  | 9.52  |
| OSBPL2  | 4.08   | 7.68  |
| OSBPL3  | 13.424 | 2.07  |
| OSBPL5  | 3.933  | 4.65  |

|          |       |       |
|----------|-------|-------|
| OSBPL6   | 4.008 | 0     |
| OSBPL7   | 4.226 | 8.41  |
| OSBPL8   | 7.48  | 2.11  |
| OSBPL9   | 3.615 | 12.75 |
| OSCAR    | 3.663 | 0.12  |
| OSGEP    | 1.547 | 26.3  |
| OSGEPL1  | 1.388 | 1.39  |
| OSGIN1   | 3.059 | 0.03  |
| OSGIN2   | 4.2   | 1.58  |
| OSM      | 1.865 | 0.86  |
| OSMR     | 4.458 | 3.18  |
| OSR1     | 1.894 | 0     |
| OSR2     | 1.736 | 0.43  |
| OSTalpha | 1.717 | 2.11  |
| OSTbeta  | 0.454 | 0     |
| OSTF1    | 1.025 | 36.24 |
| OSTF1P   | 0.751 | 11.33 |
| OSTM1    | 4.467 | 2.81  |
| OSTN     | 0.402 | 0     |
| OTC      | 1.931 | 0     |
| OTEX     | 0.755 | 0.11  |
| OTOA     | 3.873 | 0.08  |
| OTOF     | 8.939 | 0.03  |
| OTOG     | 8.775 | 0     |
| OTOP1    | 1.869 | 0     |
| OTOP2    | 1.778 | 0.05  |
| OTOP3    | 1.791 | 0     |
| OTOR     | 1.477 | 0.29  |
| OTOS     | 0.566 | 0     |
| OTP      | 2.678 | 0     |
| OTUB1    | 1.729 | 45.85 |
| OTUB2    | 3.873 | 0.08  |
| OTUD1    | 3.512 | 3.58  |
| OTUD3    | 6.621 | 1.66  |
| OTUD4    | 7.462 | 4.44  |
| OTUD5    | 2.959 | 30.26 |
| OTUD6A   | 1.689 | 0     |
| OTUD6B   | 3.142 | 1.39  |
| OTUD7A   | 3.042 | 0.16  |
| OTUD7B   | 3.152 | 1.52  |
| OTX1     | 2.176 | 0     |
| OTX2     | 2.519 | 0     |
| OVCH1    | 3.42  | 0     |
| OVCH2    | 1.695 | 0     |
| OVGP1    | 2.242 | 0.23  |
| OVOL1    | 2.993 | 0     |
| OVOL2    | 1.555 | 0     |
| OVOS2    | 4.409 | 0.13  |
| OXA1L    | 1.78  | 77.56 |
| OXCT1    | 3.37  | 7.45  |

|         |       |        |
|---------|-------|--------|
| OXCT2   | 1.824 | 0.32   |
| OXCT2P  | 1.616 | 0.36   |
| OXER1   | 1.762 | 4.02   |
| OXGR1   | 2.285 | 0      |
| OXNAD1  | 3.921 | 10.59  |
| OXR1    | 4.393 | 2.22   |
| OXSM    | 1.519 | 3.6    |
| OXSR1   | 4.523 | 9.59   |
| OXT     | 0.512 | 0.65   |
| OXTR    | 4.361 | 0.25   |
| P11     | 2.321 | 0.69   |
| P117    | 0.9   | 27.05  |
| P15RS   | 4.268 | 4.15   |
| P18SRP  | 2.318 | 2.73   |
| P2RX1   | 2.864 | 16.32  |
| P2RX2   | 2.586 | 0      |
| P2RX3   | 1.349 | 0      |
| P2RX4   | 2.028 | 6.07   |
| P2RX5   | 2.568 | 0.82   |
| P2RX7   | 3.155 | 0.7    |
| P2RXL1  | 3.554 | 0.05   |
| P2RY1   | 3.11  | 0.19   |
| P2RY10  | 1.79  | 0.14   |
| P2RY11  | 1.977 | 11.59  |
| P2RY12  | 1.704 | 0      |
| P2RY13  | 2.94  | 0.34   |
| P2RY14  | 2.412 | 12.19  |
| P2RY2   | 2.864 | 0.14   |
| P2RY4   | 1.639 | 0      |
| P2RY5   | 2.087 | 59.37  |
| P2RY6   | 3.333 | 0.88   |
| P2RY8   | 4.198 | 47.68  |
| P4HA1   | 2.814 | 14.1   |
| P4HA2   | 2.706 | 4.45   |
| P4HA3   | 2.269 | 0      |
| P4HB    | 2.422 | 166.11 |
| P5.8    | 1.143 | 0      |
| P5-04   | 0.113 | 46.96  |
| P5-05   | 0.132 | 0      |
| P5-07   | 0.587 | 0      |
| P5-09   | 0.15  | 0      |
| P5-11   | 0.146 | 0      |
| P518    | 0.411 | 0      |
| P53AIP1 | 2.659 | 0      |
| P704P   | 1.236 | 0      |
| PA2G4   | 2.111 | 60.69  |
| PA2G4P  | 1.201 | 1.54   |
| PA2G4P2 | 1.2   | 5.83   |
| PA2G4P4 | 2.757 | 3.85   |
| PA2G4P5 | 1.175 | 2.22   |

|             |        |        |
|-------------|--------|--------|
| PA2G4P6     | 7.791  | 0.41   |
| PABPC1      | 2.86   | 629.26 |
| PABPC3      | 2.43   | 126.28 |
| PABPC4      | 3.048  | 47.09  |
| PABPC5      | 3.447  | 0      |
| PABPCP1     | 0.942  | 6.35   |
| PABPCP3     | 0.964  | 57.76  |
| PABPN1      | 3.937  | 45.41  |
| PACRG       | 1.619  | 0      |
| PACS1       | 4.488  | 28.64  |
| PACS2       | 3.792  | 17.81  |
| PACSIN1     | 4.234  | 9.41   |
| PACSIN2     | 3.248  | 51.22  |
| PACSIN3     | 1.841  | 9.38   |
| PADI1       | 2.692  | 0      |
| PADI2       | 2.348  | 0.32   |
| PADI3       | 3.186  | 0      |
| PADI4       | 2.263  | 1.53   |
| PADI6       | 2.397  | 0      |
| PAEP        | 0.84   | 0      |
| PAF1        | 2.816  | 36.94  |
| PAFAH1B1    | 5.58   | 16.86  |
| PAFAH1B2    | 1.809  | 13.92  |
| PAFAH1B3    | 1.003  | 27.8   |
| PAFAH1P1    | 2.248  | 0.68   |
| PAFAH1P2    | 2.369  | 0.89   |
| PAFAH2      | 2.524  | 1.2    |
| PAG1        | 10.744 | 2.46   |
| PAGE1       | 0.665  | 0      |
| PAGE2       | 0.48   | 0      |
| PAGE2B      | 0.493  | 0      |
| PAGE3       | 0.742  | 0      |
| PAGE4       | 0.493  | 0      |
| PAGE5       | 0.923  | 0      |
| PAH         | 2.681  | 0      |
| PAICS       | 3.306  | 28.69  |
| PAIP1       | 3.035  | 4.05   |
| PAIP2       | 1.655  | 71.1   |
| PAK1        | 3.255  | 26.5   |
| PAK1IP1     | 1.497  | 6.36   |
| PAK2        | 5.793  | 18.49  |
| PAK3        | 2.516  | 0      |
| PAK4        | 4.366  | 3.8    |
| PAK6        | 3.859  | 0.26   |
| PAK7        | 4.655  | 0      |
| PALB2       | 4.007  | 2.74   |
| PALLD       | 5.809  | 0.72   |
| PALM        | 2.874  | 91.18  |
| PALM2       | 9.363  | 0      |
| PALM2-AKAP2 | 9.219  | 1.85   |

|        |       |        |
|--------|-------|--------|
| PALMD  | 2.577 | 0.23   |
| PAM    | 4     | 1.98   |
| PAMCI  | 1.56  | 0      |
| PAN3   | 4.877 | 8.38   |
| PANK1  | 3.561 | 0.69   |
| PANK2  | 3.798 | 6.72   |
| PANK3  | 3.359 | 1.93   |
| PANK4  | 2.642 | 4.75   |
| PANX1  | 2.769 | 1.95   |
| PANX2  | 2.934 | 0.03   |
| PANX3  | 1.6   | 0      |
| PAOX   | 2.934 | 2.33   |
| PAP2D  | 4.135 | 0      |
| PAPD1  | 2.572 | 3.54   |
| PAPD4  | 2.76  | 9.4    |
| PAPD5  | 7.636 | 0.71   |
| PAPLN  | 5.784 | 0.25   |
| PAPOLA | 4.509 | 30.9   |
| PAPOLB | 8.514 | 0.12   |
| PAPOLG | 4.245 | 2.26   |
| PAPPA  | 10.97 | 0.01   |
| PAPPA2 | 7.57  | 0      |
| PAPSS1 | 2.542 | 10.83  |
| PAPSS2 | 3.858 | 0.2    |
| PAQR3  | 3.821 | 2.67   |
| PAQR4  | 2.446 | 7.5    |
| PAQR5  | 4.262 | 0      |
| PAQR6  | 3.709 | 2.61   |
| PAQR7  | 3.023 | 3.99   |
| PAQR8  | 4.637 | 2.87   |
| PAQR9  | 2.103 | 0.12   |
| PAR1   | 0.1   | 0      |
| PAR4   | 0.1   | 0      |
| PAR5   | 0.1   | 0      |
| PARC   | 7.771 | 5      |
| PARD3  | 4.071 | 8.07   |
| PARD3B | 4.066 | 0      |
| PARD6A | 2.015 | 1.72   |
| PARD6B | 4.615 | 0.09   |
| PARD6G | 3.124 | 0.51   |
| PARG   | 2.614 | 1.97   |
| PARK2  | 2.961 | 0      |
| PARK7  | 0.879 | 162.53 |
| PARL   | 1.412 | 22.13  |
| PARN   | 2.992 | 10.02  |
| PARP1  | 3.861 | 149.86 |
| PARP10 | 3.47  | 25.56  |
| PARP11 | 4.486 | 1.62   |
| PARP12 | 7.582 | 2.29   |
| PARP14 | 6.881 | 14.33  |

|         |        |        |
|---------|--------|--------|
| PARP15  | 2.135  | 8.64   |
| PARP16  | 2.534  | 5.95   |
| PARP1P1 | 3.53   | 14.73  |
| PARP1P2 | 0.93   | 5.98   |
| PARP2   | 1.861  | 9.87   |
| PARP3   | 3.026  | 6.46   |
| PARP4   | 5.468  | 10.77  |
| PARP4P  | 39.973 | 0.02   |
| PARP6   | 2.626  | 14.37  |
| PARP8   | 2.956  | 4.27   |
| PARP9   | 3.233  | 10.92  |
| PARS2   | 2.347  | 1.15   |
| PAR-SN  | 0.1    | 0      |
| PART1   | 2.097  | 0      |
| PARVA   | 4.084  | 0.06   |
| PARVB   | 1.954  | 14.14  |
| PARVG   | 2.931  | 47.45  |
| PASD1   | 3.161  | 0.19   |
| PASK    | 4.53   | 3.94   |
| PATE    | 1.508  | 0      |
| PATZ1   | 6.396  | 15.53  |
| PAWR    | 1.951  | 0      |
| PAX1    | 2.771  | 0      |
| PAX2    | 9.124  | 0      |
| PAX3    | 8.643  | 0      |
| PAX4    | 4.026  | 0      |
| PAX5    | 8.81   | 29.83  |
| PAX6    | 2.966  | 0.06   |
| PAX7    | 2.389  | 0      |
| PAX8    | 6.777  | 0.08   |
| PAX9    | 1.629  | 0.05   |
| PAXIP1  | 7.424  | 1.97   |
| PB1     | 7.917  | 6.65   |
| PBEF1   | 4.752  | 1.99   |
| PBK     | 1.854  | 2.36   |
| PBLD    | 2.917  | 0.75   |
| PBOV1   | 2.505  | 0      |
| PBPP1   | 1.343  | 0.06   |
| PBX1    | 1.813  | 0      |
| PBX2    | 9.609  | 0.18   |
| PBX2P1  | 3.202  | 4.29   |
| PBX3    | 2.826  | 10.73  |
| PBX4    | 1.438  | 0.29   |
| PBXIP1  | 3.199  | 106.2  |
| PC      | 4.241  | 1.25   |
| PC-3    | 0.68   | 21.3   |
| PCAF    | 4.824  | 1.56   |
| PCBD1   | 1.006  | 8.71   |
| PCBD2   | 2.748  | 920.31 |
| PCBP1   | 1.634  | 232.29 |

|          |        |        |
|----------|--------|--------|
| PCBP2    | 1.888  | 333.68 |
| PCBP2P1  | 1.125  | 10.85  |
| PCBP3    | 1.988  | 0      |
| PCBP4    | 3.366  | 1.48   |
| PCCA     | 2.494  | 9.66   |
| PCCB     | 1.827  | 22.68  |
| PCDH1    | 7.542  | 0.03   |
| PCDH10   | 8.475  | 0      |
| PCDH11X  | 14.084 | 0      |
| PCDH11Y  | 11.256 | 0      |
| PCDH12   | 6.193  | 92.88  |
| PCDH15   | 7.021  | 0.01   |
| PCDH17   | 6.031  | 0      |
| PCDH18   | 5.143  | 0.1    |
| PCDH19   | 6.495  | 0      |
| PCDH20   | 4.404  | 0      |
| PCDH21   | 5.325  | 0.02   |
| PCDH7    | 12.444 | 0      |
| PCDH8    | 6.342  | 0.94   |
| PCDH9    | 7.064  | 17.03  |
| PCDHA@   | 0.1    | 0      |
| PCDHA1   | 9.433  | 0      |
| PCDHA10  | 9.388  | 0      |
| PCDHA11  | 8.548  | 0      |
| PCDHA12  | 7.739  | 0      |
| PCDHA13  | 7.687  | 0      |
| PCDHA14  | 2.363  | 0      |
| PCDHA2   | 8.435  | 0      |
| PCDHA3   | 7.735  | 0.03   |
| PCDHA4   | 7.749  | 0      |
| PCDHA5   | 7.669  | 0      |
| PCDHA6   | 9.301  | 0      |
| PCDHA7   | 7.591  | 0      |
| PCDHA8   | 7.705  | 0      |
| PCDHA9   | 11.648 | 0      |
| PCDHAC1  | 8.383  | 0      |
| PCDHAC2  | 8.086  | 0      |
| PCDHACT  | 2.866  | 0      |
| PCDHB1   | 2.534  | 0      |
| PCDHB10  | 3.262  | 0      |
| PCDHB11  | 3.271  | 0      |
| PCDHB12  | 3.408  | 0      |
| PCDHB13  | 3.485  | 0.2    |
| PCDHB14  | 2.783  | 0.48   |
| PCDHB15  | 2.656  | 0.22   |
| PCDHB16  | 4.817  | 0      |
| PCDHB17  | 2.411  | 0      |
| PCDHB18  | 3.166  | 0.08   |
| PCDHB19P | 4.632  | 0      |
| PCDHB2   | 2.728  | 0      |

|          |        |       |
|----------|--------|-------|
| PCDHB3   | 3.173  | 0     |
| PCDHB4   | 3.621  | 0     |
| PCDHB5   | 2.905  | 0     |
| PCDHB6   | 3.03   | 0     |
| PCDHB7   | 3.715  | 0     |
| PCDHB8   | 2.592  | 0     |
| PCDHB9   | 4.219  | 0     |
| PCDHGA1  | 7.074  | 1.93  |
| PCDHGA10 | 7.17   | 1.96  |
| PCDHGA11 | 9.609  | 1.58  |
| PCDHGA12 | 7.237  | 3.99  |
| PCDHGA2  | 7.262  | 1.78  |
| PCDHGA3  | 7.095  | 1.92  |
| PCDHGA4  | 7.131  | 1.91  |
| PCDHGA5  | 7.044  | 2.12  |
| PCDHGA6  | 7.062  | 2.23  |
| PCDHGA7  | 7.326  | 1.95  |
| PCDHGA8  | 8.093  | 1.5   |
| PCDHGA9  | 7.092  | 1.9   |
| PCDHGB1  | 7.023  | 2.14  |
| PCDHGB2  | 7.038  | 4.09  |
| PCDHGB3  | 7.041  | 2.23  |
| PCDHGB4  | 6.99   | 2.06  |
| PCDHGB5  | 7.035  | 1.93  |
| PCDHGB6  | 7.062  | 2.1   |
| PCDHGB7  | 7.311  | 2.04  |
| PCDHGB8P | 1.973  | 0.47  |
| PCDHGB9P | 2.304  | 0.03  |
| PCDHGC3  | 7.435  | 14.52 |
| PCDHGC4  | 7.239  | 1.87  |
| PCDHGC5  | 7.278  | 1.84  |
| PCF11    | 6.457  | 8.97  |
| PCFT     | 2.097  | 0.08  |
| PCGEM1   | 1.59   | 0     |
| PCGF1    | 0.871  | 11.02 |
| PCGF2    | 3.335  | 23.19 |
| PCGF3    | 5.666  | 5.13  |
| PCGF5    | 7.247  | 1.55  |
| PCGF6    | 2.23   | 1.55  |
| PCGF7P   | 1.916  | 0.57  |
| PCID1    | 1.242  | 74.87 |
| PCID2    | 1.786  | 16.46 |
| PCK1     | 2.688  | 0.03  |
| PCK2     | 2.789  | 5.92  |
| PCLKC    | 4.095  | 0.08  |
| PCLO     | 30.099 | 0.06  |
| PCM1     | 6.671  | 9.53  |
| PCMT1    | 1.599  | 18.23 |
| PCMTD1   | 3.924  | 5     |
| PCMTD2   | 3.653  | 13.33 |



|          |        |       |
|----------|--------|-------|
| PCNA     | 1.558  | 57.74 |
| PCNAP    | 0.983  | 0     |
| PCNAP1   | 1.748  | 0.24  |
| PCNP     | 2.372  | 21.95 |
| PCNT     | 10.541 | 4.36  |
| PCNX     | 7.69   | 3.68  |
| PCNXL2   | 6.089  | 1.39  |
| PCNXL3   | 7.207  | 7.98  |
| PCOLCE   | 3.016  | 0.53  |
| PCOLCE2  | 1.91   | 0.08  |
| PCOLN3   | 2.477  | 30.24 |
| PCOTH    | 0.804  | 0     |
| PCP2     | 0.826  | 6.83  |
| PCP4     | 0.556  | 0     |
| PCP4L1   | 1.43   | 0     |
| PCQAP    | 3.375  | 24.41 |
| PCQAPP   | 4.365  | 0     |
| PCSK1    | 5.054  | 0.02  |
| PCSK1N   | 0.973  | 0.08  |
| PCSK2    | 4.745  | 0     |
| PCSK4    | 2.661  | 0.44  |
| PCSK5    | 3.295  | 0     |
| PCSK6    | 8.008  | 0.31  |
| PCSK7    | 3.484  | 21.9  |
| PCSK9    | 3.636  | 0     |
| PCTK1    | 3.548  | 12.03 |
| PCTK2    | 4.041  | 1.33  |
| PCTK3    | 3.569  | 3     |
| PCTP     | 1.933  | 4.84  |
| PCYOX1   | 4.225  | 3.37  |
| PCYOX1L  | 2.506  | 8.87  |
| PCYT1A   | 2.62   | 9.97  |
| PCYT1B   | 5.447  | 0.03  |
| PCYT2    | 1.85   | 12.06 |
| PDAP1    | 4.766  | 19.24 |
| PDC      | 1.46   | 0     |
| PDCD1    | 2.107  | 0.24  |
| PDCD10   | 1.607  | 3.67  |
| PDCD11   | 6.416  | 11.58 |
| PDCD1LG2 | 1.509  | 0.45  |
| PDCD2    | 2.753  | 15.69 |
| PDCD2L   | 1.158  | 7.64  |
| PDCD4    | 3.76   | 15.44 |
| PDCD5    | 0.567  | 27.48 |
| PDCD6    | 1.132  | 73.37 |
| PDCD6IP  | 6.448  | 12.44 |
| PDCD7    | 2.851  | 8.89  |
| PDCL     | 2.743  | 5.22  |
| PDCL2    | 0.861  | 0     |
| PDCL3    | 1.066  | 10.9  |

|         |        |        |
|---------|--------|--------|
| PDDC1   | 4.363  | 9.66   |
| PDE10A  | 4.566  | 0      |
| PDE11A  | 4.444  | 0      |
| PDE1A   | 2.855  | 0      |
| PDE1B   | 3.993  | 8.34   |
| PDE1C   | 5.388  | 0      |
| PDE2A   | 4.23   | 0.14   |
| PDE3A   | 4.287  | 3.12   |
| PDE3B   | 4.774  | 0.07   |
| PDE4A   | 4.256  | 0.36   |
| PDE4B   | 5.326  | 15.83  |
| PDE4C   | 3.381  | 0      |
| PDE4D   | 5.876  | 0.44   |
| PDE4DIP | 13.021 | 1.83   |
| PDE5A   | 7.769  | 0.08   |
| PDE6A   | 2.944  | 0      |
| PDE6B   | 3.232  | 0.03   |
| PDE6C   | 2.968  | 0.03   |
| PDE6D   | 1.118  | 33.23  |
| PDE6G   | 1.221  | 7.04   |
| PDE6H   | 0.725  | 0      |
| PDE7A   | 4.354  | 6.41   |
| PDE7B   | 5.387  | 0      |
| PDE8A   | 4.7    | 1.36   |
| PDE8B   | 3.567  | 0.54   |
| PDE9A   | 2.636  | 1.76   |
| PDF     | 1.356  | 12.48  |
| PDGFA   | 4.714  | 0.95   |
| PDGFB   | 3.462  | 0.03   |
| PDGFC   | 3.007  | 0.03   |
| PDGFD   | 4.18   | 0.02   |
| PDGFRA  | 6.391  | 0      |
| PDGFRB  | 5.714  | 2.67   |
| PDGFRL  | 1.502  | 0      |
| PDHA1   | 1.472  | 37.6   |
| PDHA2   | 1.383  | 1.4    |
| PDHB    | 1.501  | 31.65  |
| PDHX    | 2.344  | 3.38   |
| PDIA2   | 1.658  | 0.05   |
| PDIA3   | 3.054  | 106.96 |
| PDIA3P  | 2.099  | 77.33  |
| PDIA4   | 5.824  | 28.91  |
| PDIA5   | 1.679  | 12.14  |
| PDIA6   | 2.328  | 119.45 |
| PDIK1L  | 4.288  | 1.1    |
| PDILT   | 2.127  | 0      |
| PDK1    | 4.576  | 1.86   |
| PDK2    | 2.29   | 13.72  |
| PDK3    | 1.593  | 1.11   |
| PDK4    | 7.399  | 10.79  |

|          |        |        |
|----------|--------|--------|
| PDLIM1   | 1.452  | 208.67 |
| PDLIM1P  | 1.072  | 14.15  |
| PDLIM2   | 6.143  | 8.76   |
| PDLIM3   | 1.706  | 0      |
| PDLIM4   | 2.259  | 0      |
| PDLIM5   | 7.474  | 0.1    |
| PDLIM7   | 2.074  | 10.77  |
| PDP2     | 3.83   | 0.55   |
| PDPK1    | 7.236  | 6.8    |
| PDPK2    | 27.176 | 0.98   |
| PDPN     | 3.22   | 0      |
| PDPR     | 8.664  | 5.65   |
| PDRG1    | 1.373  | 16.44  |
| PDSS1    | 1.619  | 1.2    |
| PDSS2    | 3.526  | 2.08   |
| PDX1     | 1.523  | 0.06   |
| PDXK     | 7.373  | 24.66  |
| PDXP     | 2.005  | 20.25  |
| PDYN     | 2.557  | 0      |
| PDZD11   | 1.663  | 15.09  |
| PDZD2    | 11.642 | 0.03   |
| PDZD3    | 2.204  | 0.03   |
| PDZD4    | 3.745  | 0.25   |
| PDZD7    | 2.021  | 0.25   |
| PDZD8    | 3.837  | 3.14   |
| PDZK1    | 2.107  | 0.08   |
| PDZK1IP1 | 0.894  | 0.47   |
| PDZRN3   | 4.161  | 0.22   |
| PDZRN4   | 3.21   | 0      |
| PEA15    | 2.469  | 22.01  |
| PEAR1    | 4.866  | 15.58  |
| PEBP1    | 1.491  | 210.39 |
| PEBP4    | 0.883  | 0.19   |
| PECAM1   | 3.178  | 35.67  |
| PECI     | 1.617  | 16.21  |
| PECR     | 1.846  | 0.04   |
| PEF1     | 1.61   | 40.44  |
| PEG10    | 13.232 | 0      |
| PEG3     | 6.371  | 0.05   |
| PELI1    | 7.137  | 0.94   |
| PELI2    | 5.696  | 0      |
| PELI3    | 2.68   | 2.14   |
| PELO     | 2.92   | 1.3    |
| PELP1    | 3.393  | 24.05  |
| PEMT     | 1.504  | 45.92  |
| PENK     | 1.196  | 0      |
| PEO1     | 3.602  | 7.81   |
| PEPD     | 1.889  | 24.79  |
| PEPP-2   | 1.297  | 0      |
| PER1     | 4.656  | 8.59   |

|         |        |         |
|---------|--------|---------|
| PER2    | 6.235  | 2.06    |
| PER3    | 6.203  | 0.34    |
| PER4    | 3.096  | 0       |
| PERF15  | 0.399  | 0       |
| PERLD1  | 2.687  | 9.97    |
| PERP    | 1.945  | 0.04    |
| PERQ1   | 12.658 | 9.24    |
| PES1    | 2.262  | 35.38   |
| PET112L | 2.011  | 8.71    |
| PEX1    | 8.764  | 1.66    |
| PEX10   | 3.215  | 16.45   |
| PEX11A  | 1.163  | 0       |
| PEX11B  | 1.61   | 22.29   |
| PEX11G  | 1.062  | 1.35    |
| PEX12   | 2.6    | 0.88    |
| PEX13   | 1.724  | 1.81    |
| PEX14   | 1.908  | 13.33   |
| PEX16   | 1.844  | 12.33   |
| PEX19   | 3.656  | 13.99   |
| PEX26   | 3.319  | 13.83   |
| PEX3    | 1.967  | 4.24    |
| PEX5    | 3.169  | 10.15   |
| PEX5L   | 3.577  | 0       |
| PEX6    | 3.27   | 33.34   |
| PEX7    | 1.448  | 1.86    |
| PF4     | 0.438  | 0.39    |
| PF4V1   | 0.741  | 0       |
| PFAAP5  | 2.825  | 15.92   |
| PFAS    | 5.338  | 8.89    |
| PFDN1   | 1.324  | 36.32   |
| PFDN2   | 0.642  | 59.83   |
| PFDN4   | 1.346  | 4.25    |
| PFDN5   | 0.687  | 347.85  |
| PFDN6   | 1.782  | 0       |
| PFKFB1  | 1.732  | 0.05    |
| PFKFB2  | 9.143  | 0.69    |
| PFKFB3  | 4.482  | 2.42    |
| PFKFB4  | 3.49   | 0.34    |
| PFKL    | 3.824  | 77.45   |
| PFKM    | 2.747  | 10.18   |
| PFKP    | 2.616  | 51.55   |
| PFN1    | 0.807  | 1375.96 |
| PFN2    | 3.467  | 5.49    |
| PFN3    | 0.414  | 0       |
| PFN4    | 0.778  | 0.21    |
| PFTK1   | 9.908  | 1.85    |
| pFUSIP1 | 0.522  | 0       |
| PGA3    | 1.937  | 0       |
| PGA4    | 2.07   | 0       |
| PGA5    | 1.36   | 0.06    |

|         |        |        |
|---------|--------|--------|
| PGAM1   | 1.72   | 9.06   |
| PGAM2   | 1.666  | 1.77   |
| PGAM3P  | 0.427  | 0      |
| PGAM4   | 1.678  | 0.05   |
| PGAM5   | 2.189  | 20.01  |
| PGAP1   | 11.113 | 0.46   |
| PGBD1   | 3.065  | 0.91   |
| PGBD2   | 3.858  | 1.27   |
| PGBD3   | 2.172  | 1.09   |
| PGBD3P1 | 1.797  | 0      |
| PGBD3P2 | 0.614  | 0      |
| PGBD3P3 | 1.158  | 0      |
| PGBD3P4 | 1.844  | 0      |
| PGBD4   | 3.907  | 0.62   |
| PGBD5   | 3.444  | 0      |
| PGC     | 1.354  | 0      |
| PGCP    | 1.898  | 8.83   |
| PGD     | 1.937  | 50.53  |
| PGDS    | 1.615  | 0      |
| PGF     | 1.731  | 0.48   |
| PGGT1B  | 1.658  | 1.72   |
| PGK1    | 2.32   | 84.71  |
| PGK1P1  | 1.77   | 9.61   |
| PGK1P2  | 1.527  | 10.15  |
| PGK2    | 1.644  | 0      |
| PGLS    | 1.249  | 69.06  |
| PGLYRP1 | 0.69   | 12.58  |
| PGLYRP2 | 2.751  | 0.15   |
| PGLYRP3 | 1.173  | 0      |
| PGLYRP4 | 1.834  | 0      |
| PGM1    | 2.472  | 7.67   |
| PGM2    | 3.177  | 12.28  |
| PGM2L1  | 8.501  | 0.55   |
| PGM3    | 1.994  | 1.78   |
| PGM5    | 3.338  | 7.88   |
| PGM5P1  | 87.489 | 0.06   |
| PGM5P2  | 69.591 | 0.05   |
| PGPEP1  | 7.084  | 0.2    |
| PGR     | 5      | 0      |
| PGRMC1  | 1.864  | 6.33   |
| PGRMC2  | 1.853  | 14.96  |
| PGS1    | 2.192  | 13.76  |
| PH-4    | 4.03   | 2.8    |
| PHACS   | 2.128  | 13.42  |
| PHACTR1 | 5.237  | 29.78  |
| PHACTR2 | 4.318  | 0.02   |
| PHACTR3 | 3.119  | 0      |
| PHACTR4 | 4.362  | 7.74   |
| PHB     | 1.826  | 58.73  |
| PHB2    | 1.416  | 189.65 |

|         |       |       |
|---------|-------|-------|
| PHBP1   | 1.024 | 0.25  |
| PHC1    | 5.179 | 4.13  |
| PHC2    | 4.375 | 31.4  |
| PHC3    | 3.319 | 5.33  |
| PHCA    | 3.452 | 1.15  |
| PHEX    | 2.861 | 2.47  |
| PHF1    | 3.106 | 15.11 |
| PHF10   | 2.371 | 13.36 |
| PHF10P1 | 1.668 | 3.99  |
| PHF11   | 2.024 | 19.6  |
| PHF12   | 5.609 | 10.72 |
| PHF13   | 3.644 | 3.03  |
| PHF14   | 9.16  | 4.14  |
| PHF15   | 6.595 | 23.45 |
| PHF16   | 4.931 | 2.82  |
| PHF17   | 6.307 | 10.42 |
| PHF19   | 4.658 | 14.94 |
| PHF2    | 5.397 | 10.02 |
| PHF20   | 5.515 | 6.55  |
| PHF20L1 | 8.056 | 3.28  |
| PHF21A  | 3.692 | 11.55 |
| PHF21B  | 3.671 | 0     |
| PHF23   | 1.971 | 19.23 |
| PHF3    | 6.947 | 7.27  |
| PHF5A   | 1.065 | 20.09 |
| PHF5CP  | 1.274 | 0.07  |
| PHF5DP  | 0.94  | 3.04  |
| PHF5EP  | 0.93  | 0     |
| PHF5FP  | 3.283 | 0.28  |
| PHF5GP  | 0.892 | 0.28  |
| PHF5HP  | 1.323 | 0.06  |
| PHF6    | 8.341 | 2.23  |
| PHF7    | 2.276 | 2.63  |
| PHF8    | 5.762 | 8.68  |
| PHGDH   | 1.913 | 0.53  |
| PHGDHL1 | 2.525 | 15.24 |
| PHIP    | 6.281 | 3.5   |
| PHKA1   | 4.205 | 0     |
| PHKA2   | 4.565 | 6.05  |
| PHKB    | 4.959 | 19.59 |
| PHKBP1  | 0.7   | 0     |
| PHKBP2  | 0.527 | 0     |
| PHKG1   | 2.862 | 0.14  |
| PHKG1P1 | 3.868 | 0     |
| PHKG1P2 | 3.314 | 0     |
| PHKG2   | 1.578 | 9.98  |
| PHKGL   | 2.006 | 0     |
| PHLDA1  | 5.913 | 0.04  |
| PHLDA2  | 0.92  | 0.09  |
| PHLDA3  | 1.516 | 8.84  |

|          |       |       |
|----------|-------|-------|
| PHLDB1   | 5.695 | 2.35  |
| PHLDB2   | 5.474 | 0.02  |
| PHLDB3   | 2.286 | 1.07  |
| PHLPP    | 4.798 | 14.01 |
| PHLPPL   | 7.919 | 0.6   |
| PHOSPHO1 | 2.046 | 1.2   |
| PHOSPHO2 | 1.125 | 0.37  |
| PHOX2A   | 1.683 | 0.05  |
| PHOX2B   | 3.029 | 0     |
| PHPT1    | 0.906 | 51.69 |
| PHTF1    | 2.81  | 6.08  |
| PHTF2    | 9.556 | 1.91  |
| PHYH     | 2.106 | 1.44  |
| PHYHD1   | 1.599 | 0.48  |
| PHYHIP   | 2.948 | 0.08  |
| PHYHIPL  | 3.103 | 0     |
| PI15     | 6.732 | 0     |
| PI16     | 2.19  | 1.39  |
| PI3      | 0.596 | 0     |
| PI4K2B   | 3.458 | 2.34  |
| PI4KII   | 4.185 | 3.28  |
| PIAS1    | 2.289 | 9.53  |
| PIAS2    | 2.457 | 7.03  |
| PIAS3    | 2.858 | 7.28  |
| PIAS4    | 1.961 | 10.66 |
| PIB5PA   | 2.558 | 2.27  |
| PICALM   | 3.873 | 20.73 |
| PICK1    | 2.624 | 11.46 |
| PID1     | 2.745 | 0.12  |
| PIF1     | 2.658 | 1.36  |
| PIGA     | 6.093 | 0.32  |
| PIGAP1   | 3.367 | 0.08  |
| PIGB     | 2.134 | 3.04  |
| PIGC     | 1.708 | 15.59 |
| PIGCP1   | 0.417 | 1.42  |
| PIGF     | 1.398 | 3.61  |
| PIGFP1   | 0.911 | 1.76  |
| PIGG     | 3.197 | 6.27  |
| PIGH     | 1.393 | 3.21  |
| PIGK     | 1.887 | 5.49  |
| PIGL     | 1.123 | 0.75  |
| PIGM     | 2.066 | 2.77  |
| PIGN     | 4.812 | 4.36  |
| PIGO     | 4.366 | 2.7   |
| PIGP     | 1.174 | 6.31  |
| PIGQ     | 4.148 | 11.43 |
| PIGR     | 4.266 | 0.04  |
| PIGS     | 2.515 | 26.26 |
| PIGT     | 2.228 | 32.7  |
| PIGU     | 1.832 | 13.06 |

|         |        |       |
|---------|--------|-------|
| PIGV    | 2.365  | 6.45  |
| PIGW    | 2.255  | 2.69  |
| PIGX    | 1.862  | 2.31  |
| PIGY    | 1.304  | 39.79 |
| PIGZ    | 2.701  | 1.06  |
| PIH1D1  | 1.192  | 33.71 |
| PIH1D2  | 1.049  | 0.4   |
| PIK3AP1 | 4.811  | 50.71 |
| PIK3C2A | 5.061  | 1.01  |
| PIK3C2B | 7.603  | 10.25 |
| PIK3C2G | 4.846  | 0     |
| PIK3C3  | 3.069  | 6.34  |
| PIK3CA  | 3.712  | 3.79  |
| PIK3CB  | 3.213  | 1.91  |
| PIK3CD  | 5.203  | 67.09 |
| PIK3CG  | 10.758 | 6.64  |
| PIK3R1  | 6.933  | 5.87  |
| PIK3R2  | 3.938  | 10.76 |
| PIK3R3  | 5.609  | 1.64  |
| PIK3R4  | 4.987  | 5.4   |
| PIK3R5  | 4.093  | 16.49 |
| PIK4CA  | 6.75   | 10.62 |
| PIK4CB  | 3.471  | 23.68 |
| PILRA   | 3.326  | 0.53  |
| PILRB   | 10.86  | 7.4   |
| PIM1    | 2.645  | 72.61 |
| PIM2    | 2.058  | 61.69 |
| PIM3    | 2.361  | 43.46 |
| PIN1    | 0.997  | 51.54 |
| PIN1L   | 1.204  | 1.12  |
| PIN4    | 1.071  | 9.12  |
| PINK1   | 2.66   | 10.83 |
| PINX1   | 1.545  | 8.07  |
| PIP     | 1.152  | 0     |
| PIP3-E  | 6.687  | 0.37  |
| PIP5K1A | 3.715  | 18.27 |
| PIP5K1B | 4.089  | 3.09  |
| PIP5K1C | 5.047  | 12.33 |
| PIP5K2A | 1.758  | 1.58  |
| PIP5K2B | 5.558  | 23.28 |
| PIP5K2C | 2.924  | 0.78  |
| PIP5K3  | 10.547 | 3.08  |
| PIP5KL1 | 1.104  | 0.15  |
| PIPOX   | 2.412  | 0     |
| PIR     | 1.468  | 0     |
| PISD    | 2.679  | 11.32 |
| PITPNA  | 3.803  | 16.75 |
| PITPNB  | 2.925  | 18.31 |
| PITPNC1 | 3.068  | 8.23  |
| PITPNM1 | 4.189  | 5.17  |



|          |        |        |
|----------|--------|--------|
| PITPNM2  | 6.736  | 0.85   |
| PITPNM3  | 3.111  | 0      |
| PITRM1   | 3.456  | 16.99  |
| PITX1    | 2.362  | 0.21   |
| PITX2    | 3.081  | 0      |
| PITX3    | 1.388  | 0      |
| PIWIL1   | 3.406  | 0      |
| PIWIL2   | 3.611  | 0.03   |
| PIWIL3   | 3.504  | 0      |
| PIWIL4   | 3.138  | 0.32   |
| PJA1     | 6.445  | 2.6    |
| PJA2     | 4.754  | 13.72  |
| PJCG6    | 0.954  | 0      |
| PKD1     | 14.188 | 3.47   |
| PKD1L1   | 18.002 | 0.07   |
| PKD1L2   | 8.114  | 0      |
| PKD1L3   | 5.742  | 0.31   |
| PKD1P1   | 24.064 | 0.1    |
| PKD1P2   | 21.284 | 0.03   |
| PKD1P3   | 24.232 | 0.31   |
| PKD1P4   | 18.077 | 0.03   |
| PKD1P5   | 27.494 | 0.13   |
| PKD1P6   | 29.386 | 0.24   |
| PKD2     | 5.056  | 3.95   |
| PKD2L1   | 3.051  | 0      |
| PKD2L2   | 2.185  | 0      |
| PKDREJ   | 7.66   | 0.29   |
| PKHD1    | 17.407 | 0      |
| PKHD1L1  | 13.083 | 0      |
| PKIA     | 2.184  | 0      |
| PKIB     | 2.18   | 0.15   |
| PKIG     | 1.433  | 4.23   |
| PKLR     | 2.558  | 0.53   |
| PKM2     | 3.069  | 280.48 |
| PKMYT1   | 2.495  | 6.65   |
| PKN1     | 3.136  | 50.47  |
| PKN2     | 3.254  | 2.69   |
| PKN3     | 3.377  | 16.89  |
| PKNOX1   | 6.673  | 2.8    |
| PKNOX2   | 3.177  | 0      |
| PKP1     | 5.443  | 0      |
| PKP2     | 4.379  | 0      |
| PKP2P1   | 4.585  | 0.08   |
| PKP3     | 2.809  | 0      |
| PKP4     | 4.591  | 7.8    |
| PLA1A    | 1.731  | 0.05   |
| PLA2G10  | 0.997  | 0.08   |
| PLA2G12A | 1.659  | 3.25   |
| PLA2G12B | 1.092  | 0      |
| PLA2G1B  | 0.565  | 0.59   |

|         |        |       |
|---------|--------|-------|
| PLA2G2A | 0.97   | 0     |
| PLA2G2D | 2.63   | 0.07  |
| PLA2G2E | 0.487  | 0     |
| PLA2G2F | 2.716  | 0     |
| PLA2G3  | 2.575  | 0     |
| PLA2G4A | 2.855  | 0.03  |
| PLA2G4B | 3.502  | 8.32  |
| PLA2G4C | 2.424  | 0.87  |
| PLA2G4D | 3.584  | 0     |
| PLA2G4E | 2.52   | 0     |
| PLA2G4F | 3.399  | 0     |
| PLA2G5  | 1.016  | 0.58  |
| PLA2G6  | 3.223  | 9.04  |
| PLA2G7  | 1.565  | 0.16  |
| PLA2R1  | 5.979  | 0     |
| PLAA    | 3.841  | 1.95  |
| PLAC1   | 1.126  | 0     |
| PLAC1L  | 1.633  | 0     |
| PLAC2   | 2.467  | 0.1   |
| PLAC4   | 3.029  | 0     |
| PLAC8   | 0.739  | 88.23 |
| PLAC8L1 | 0.725  | 0     |
| PLAC9   | 0.675  | 0.13  |
| PLAG1   | 7.302  | 0.13  |
| PLAGL1  | 6.085  | 0.2   |
| PLAGL2  | 5.641  | 7.02  |
| PLAT    | 4.718  | 0.13  |
| PLAU    | 2.346  | 1.4   |
| PLAUR   | 2.001  | 11.11 |
| PLB1    | 5.063  | 0.02  |
| PLCB1   | 10.102 | 0.47  |
| PLCB2   | 4.52   | 5.03  |
| PLCB3   | 3.993  | 6.56  |
| PLCB4   | 7.424  | 0     |
| PLCD1   | 2.669  | 2.37  |
| PLCD3   | 3.424  | 1.38  |
| PLCD4   | 3.088  | 0.47  |
| PLCE1   | 7.593  | 0     |
| PLCG1   | 5.39   | 4.37  |
| PLCG2   | 4.245  | 16.37 |
| PLCH1   | 6.065  | 0.02  |
| PLCH2   | 4.837  | 0.05  |
| PLCL1   | 4.559  | 0     |
| PLCL2   | 3.94   | 18.86 |
| PLCXD1  | 2.085  | 12.28 |
| PLCXD2  | 2.063  | 0.12  |
| PLCXD3  | 7.541  | 0     |
| PLCZ1   | 2.075  | 0     |
| PLD1    | 5.479  | 0.08  |
| PLD2    | 3.457  | 1.78  |

|           |        |        |
|-----------|--------|--------|
| PLD3      | 2.408  | 34.81  |
| PLD4      | 1.934  | 27.48  |
| PLD5      | 2.729  | 0.06   |
| PLDN      | 3.941  | 4.93   |
| PLEC1     | 16.296 | 3.61   |
| PLEK      | 2.747  | 7.61   |
| PLEK2     | 1.46   | 0      |
| PLEKHA1   | 3.796  | 0.71   |
| PLEKHA2   | 2.177  | 17.72  |
| PLEKHA3   | 2.47   | 2.15   |
| PLEKHA3P1 | 1.51   | 2.12   |
| PLEKHA4   | 3.056  | 0.64   |
| PLEKHA5   | 4.238  | 2.74   |
| PLEKHA6   | 7.399  | 0.03   |
| PLEKHA7   | 4.801  | 0.07   |
| PLEKHA8   | 3.966  | 0.15   |
| PLEKHA9   | 1.839  | 2.16   |
| PLEKHB1   | 2.38   | 0.78   |
| PLEKHB2   | 3.88   | 13.24  |
| PLEKHC1   | 3.226  | 0.63   |
| PLEKHF1   | 2.084  | 0.25   |
| PLEKHF2   | 2.882  | 8.39   |
| PLEKHG1   | 7.237  | 0.81   |
| PLEKHG2   | 4.706  | 8.93   |
| PLEKHG3   | 4.4    | 4.83   |
| PLEKHG4   | 6.783  | 0.22   |
| PLEKHG5   | 5.691  | 0.43   |
| PLEKHG6   | 2.881  | 0.12   |
| PLEKHH1   | 6.512  | 0.02   |
| PLEKHH2   | 6.946  | 0      |
| PLEKHH3   | 2.983  | 0.79   |
| PLEKHJ1   | 1.215  | 39.31  |
| PLEKHK1   | 6.641  | 0      |
| PLEKHM1   | 5.263  | 9.28   |
| PLEKHM2   | 4.209  | 18.92  |
| PLEKHN1   | 2.404  | 0      |
| PLEKHO1   | 1.615  | 131.91 |
| PLEKHQ1   | 3.67   | 5.6    |
| PLG       | 2.732  | 0      |
| PLGLA1    | 1.401  | 0      |
| PLGLB1    | 1.535  | 0.54   |
| PLGLB2    | 1.56   | 0.32   |
| PLIN      | 2.909  | 0.14   |
| PLK1      | 2.169  | 19.73  |
| PLK2      | 2.786  | 1.48   |
| PLK3      | 2.358  | 7.39   |
| PLK4      | 3.333  | 2.57   |
| PLLP      | 1.482  | 0      |
| PLN       | 1.684  | 0      |
| PLOD1     | 3.004  | 13.24  |

|         |        |        |
|---------|--------|--------|
| PLOD2   | 4.06   | 0      |
| PLOD3   | 5.954  | 7.26   |
| PLP1    | 3.183  | 0      |
| PLP2    | 0.929  | 106.72 |
| PLRG1   | 1.783  | 13.14  |
| PLS1    | 3.639  | 0.03   |
| PLS3    | 3.089  | 0      |
| PLSCR1  | 2.077  | 34.35  |
| PLSCR2  | 1.265  | 0      |
| PLSCR3  | 1.746  | 6.51   |
| PLSCR4  | 3.207  | 0.05   |
| PLSCR5  | 1.058  | 0      |
| PLTP    | 1.745  | 2.9    |
| PLUNC   | 1.22   | 0      |
| PLVAP   | 2.276  | 510.56 |
| PLXDC1  | 6.122  | 0.24   |
| PLXDC2  | 2.594  | 0.03   |
| PLXNA1  | 8.998  | 1.26   |
| PLXNA2  | 6.263  | 0.62   |
| PLXNA3  | 6.746  | 1.86   |
| PLXNA4B | 4      | 0      |
| PLXNB1  | 7.097  | 0.3    |
| PLXNB2  | 6.434  | 61.63  |
| PLXNB3  | 6.145  | 0.55   |
| PLXNC1  | 5.12   | 0.39   |
| PLXND1  | 7.094  | 104.12 |
| PMAIP1  | 1.89   | 6.24   |
| PMCH    | 0.757  | 0.22   |
| PMCHL1  | 1.917  | 0      |
| PMF1    | 1.082  | 31.53  |
| PMFBP1  | 3.395  | 0.13   |
| PML     | 11.447 | 12.62  |
| PMM1    | 1.203  | 3.64   |
| PMM2    | 2.29   | 8.57   |
| PMP2    | 3.569  | 0      |
| PMP22   | 3.159  | 0.42   |
| PMP22CD | 1.098  | 0      |
| PMPCA   | 2.08   | 24.3   |
| PMPCB   | 7.838  | 6.53   |
| PMS1    | 3.222  | 4.18   |
| PMS2    | 5.61   | 1.86   |
| PMS2CL  | 36.07  | 0.2    |
| PMS2L1  | 3.41   | 1.58   |
| PMS2L2  | 2.676  | 2.55   |
| PMS2L3  | 3.296  | 1.74   |
| PMS2L5  | 1.496  | 0.06   |
| PMVK    | 1.28   | 37.65  |
| PNCK    | 1.525  | 0      |
| PNKD    | 5.374  | 5.96   |
| PNKP    | 1.716  | 12.91  |

|          |        |        |
|----------|--------|--------|
| PNLDC1   | 1.92   | 0.08   |
| PNLIP    | 1.498  | 0      |
| PNLIPRP1 | 1.48   | 0      |
| PNLIPRP2 | 1.455  | 0      |
| PNLIPRP3 | 2.353  | 0      |
| PNMA1    | 2.643  | 6.63   |
| PNMA2    | 4.788  | 0.02   |
| PNMA3    | 3.517  | 0.36   |
| PNMA5    | 3.194  | 0.03   |
| PNMA6A   | 2.209  | 0      |
| PNMT     | 1.157  | 1.39   |
| PNN      | 2.598  | 54.18  |
| PNO1     | 1.978  | 4      |
| PNOC     | 1.196  | 0.21   |
| PNPLA1   | 2.808  | 0      |
| PNPLA10P | 0.36   | 0.47   |
| PNPLA2   | 2.072  | 27.85  |
| PNPLA3   | 2.805  | 0      |
| PNPLA4   | 2.815  | 2.6    |
| PNPLA5   | 2.504  | 0      |
| PNPLA6   | 4.432  | 12.83  |
| PNPLA7   | 4.581  | 5.28   |
| PNPLA8   | 7.064  | 1.63   |
| PNPO     | 2.397  | 12.9   |
| PNPT1    | 3.273  | 3.96   |
| PNRC1    | 2.065  | 39.69  |
| PNRC2    | 2.367  | 9.58   |
| PODN     | 3.01   | 0.03   |
| PODNL1   | 2.164  | 3      |
| PODXL    | 11.952 | 0.12   |
| PODXL2   | 2.151  | 1.73   |
| POF1B    | 3.941  | 0      |
| POFUT1   | 6.135  | 6.33   |
| POFUT2   | 8.565  | 1.09   |
| POGK     | 3.852  | 9.1    |
| POGZ     | 7.691  | 15.27  |
| POL3S    | 1.662  | 1.27   |
| POLA1    | 5.437  | 4.57   |
| POLA2    | 2.474  | 9.77   |
| POLB     | 1.259  | 6.82   |
| POLD1    | 3.443  | 13.83  |
| POLD2    | 3.168  | 31.59  |
| POLD3    | 3.43   | 6.87   |
| POLD4    | 1.123  | 115.51 |
| POLDIP2  | 2.683  | 31.9   |
| POLDIP3  | 3.435  | 31     |
| POLE     | 7.84   | 15.16  |
| POLE2    | 1.69   | 1.1    |
| POLE3    | 2.185  | 39.94  |
| POLE4    | 0.696  | 28.32  |

|           |        |        |
|-----------|--------|--------|
| POLG      | 4.434  | 20.19  |
| POLG2     | 1.579  | 4.64   |
| POLH      | 3.464  | 16.95  |
| POLI      | 2.472  | 1.46   |
| POLK      | 4.075  | 1.63   |
| POLL      | 2.677  | 9.66   |
| POLM      | 5.147  | 4.79   |
| POLN      | 2.899  | 0.08   |
| POLQ      | 8.756  | 0.71   |
| POLR1A    | 6.368  | 6.2    |
| POLR1B    | 5.969  | 4.28   |
| POLR1C    | 1.439  | 6.79   |
| POLR1D    | 0.693  | 45.58  |
| POLR1E    | 1.854  | 6.04   |
| POLR2A    | 6.732  | 90.58  |
| POLR2B    | 3.748  | 23.17  |
| POLR2C    | 1.804  | 50.29  |
| POLR2CP   | 1.624  | 1.82   |
| POLR2D    | 1.907  | 13.91  |
| POLR2E    | 1.226  | 77.99  |
| POLR2F    | 0.545  | 52.55  |
| POLR2G    | 0.827  | 73.34  |
| POLR2H    | 0.821  | 32.42  |
| POLR2I    | 0.872  | 37.38  |
| POLR2J    | 1.954  | 17.46  |
| POLR2J2   | 5.362  | 9.15   |
| POLR2J3   | 0.696  | 1.82   |
| POLR2K    | 0.971  | 21.86  |
| POLR2L    | 0.876  | 129.91 |
| POLR3A    | 5.946  | 3.71   |
| POLR3B    | 4.219  | 1.36   |
| POLR3C    | 1.851  | 12.83  |
| POLR3D    | 1.929  | 18.34  |
| POLR3E    | 2.608  | 9.76   |
| POLR3F    | 2.154  | 3.13   |
| POLR3G    | 0.996  | 0.51   |
| POLR3GL   | 1.165  | 23     |
| POLR3H    | 9.088  | 5.74   |
| POLR3K    | 0.796  | 31.85  |
| POLRMT    | 3.773  | 11.81  |
| POLS      | 3.861  | 3.08   |
| POM121    | 11.994 | 3.74   |
| POM121L1  | 12.011 | 0.06   |
| POM121L2  | 2.978  | 0      |
| POM121L4P | 1.284  | 0      |
| POMC      | 1.295  | 0.2    |
| POMGNT1   | 2.711  | 20.85  |
| POMP      | 1.317  | 26.28  |
| POMT1     | 7.009  | 23.59  |
| POMT2     | 4.866  | 1.78   |

|          |        |       |
|----------|--------|-------|
| POMZP3   | 3.442  | 7.57  |
| PON1     | 4.786  | 0     |
| PON2     | 3.49   | 14.7  |
| PON3     | 2.382  | 0.18  |
| POP1     | 3.244  | 2.29  |
| POP2     | 0.294  | 0     |
| POP4     | 1.108  | 16.2  |
| POP5     | 0.833  | 32.77 |
| POP7     | 1.668  | 8.44  |
| POPDC2   | 1.646  | 0.92  |
| POPDC3   | 1.858  | 0.04  |
| POR      | 5.25   | 7.3   |
| PORCN    | 2.177  | 3.02  |
| POSTN    | 3.213  | 0     |
| POT1     | 5.262  | 2.69  |
| POTE15   | 2.132  | 0     |
| POTE2    | 2.429  | 0     |
| POTE8    | 1.976  | 0     |
| POU1F1   | 1.262  | 0     |
| POU2AF1  | 3.291  | 66.42 |
| POU2F1   | 2.689  | 2.1   |
| POU2F2   | 4.211  | 9.2   |
| POU2F3   | 2.87   | 0     |
| POU3F1   | 2.173  | 0     |
| POU3F2   | 4.087  | 0     |
| POU3F3   | 1.503  | 0.28  |
| POU3F4   | 1.475  | 0     |
| POU4F1   | 4.104  | 12.5  |
| POU4F2   | 3.098  | 0     |
| POU4F3   | 1.017  | 0     |
| POU5F1   | 5.586  | 0.15  |
| POU5F1P1 | 1.08   | 0     |
| POU6F1   | 2.911  | 0.35  |
| POU6F2   | 4.446  | 0     |
| PP1P     | 1.269  | 8.03  |
| PP8961   | 0.447  | 0     |
| PPA1     | 1.302  | 24.2  |
| PPA2     | 1.673  | 6.95  |
| PPAN     | 1.662  | 11.86 |
| PPAP2A   | 1.778  | 2.04  |
| PPAP2B   | 3.795  | 0.25  |
| PPAP2C   | 1.791  | 0.05  |
| PPAPDC1A | 1.521  | 0     |
| PPAPDC1B | 1.212  | 6.53  |
| PPAPDC2  | 2.965  | 2.18  |
| PPAPDC3  | 2.05   | 0     |
| PPARA    | 13.437 | 3.96  |
| PPARBP   | 7.521  | 9.16  |
| PPARD    | 3.734  | 7.35  |
| PPARG    | 2.607  | 0.03  |

|          |       |        |
|----------|-------|--------|
| PPARGC1A | 6.317 | 0      |
| PPARGC1B | 3.274 | 0.75   |
| PPAT     | 3.746 | 3.31   |
| PPBP     | 0.701 | 0.24   |
| PPCDC    | 2.219 | 3.19   |
| PPCS     | 1.431 | 15.78  |
| PPEF1    | 2.942 | 0.06   |
| PPEF2    | 3.414 | 0      |
| PPFIA1   | 5.576 | 3.78   |
| PPFIA2   | 4.052 | 0      |
| PPFIA3   | 4.721 | 0.7    |
| PPFIA4   | 5.045 | 1.77   |
| PPFIBP1  | 6.313 | 3.75   |
| PPFIBP2  | 3.503 | 0.14   |
| PPHLN1   | 4.84  | 8.32   |
| PPIA     | 4.995 | 21.23  |
| PPIAL    | 0.715 | 0.7    |
| PPIAL4   | 0.66  | 0      |
| PPIAP    | 0.759 | 0.11   |
| PPIAP10  | 0.446 | 0      |
| PPIAP11  | 0.746 | 0.68   |
| PPIAP13  | 0.852 | 0.2    |
| PPIAP14  | 0.818 | 0.41   |
| PPIAP15  | 0.8   | 0.1    |
| PPIAP16  | 0.867 | 0.2    |
| PPIAP17  | 0.786 | 0      |
| PPIAP2   | 0.495 | 0.34   |
| PPIAP3   | 0.505 | 0.33   |
| PPIAP4   | 0.714 | 0      |
| PPIAP5   | 0.721 | 0      |
| PPIAP6   | 0.843 | 0.5    |
| PPIAP7   | 0.87  | 0      |
| PPIAP9   | 3.979 | 0      |
| PPIB     | 1.028 | 378.32 |
| PPIC     | 1.236 | 1.43   |
| PPID     | 1.834 | 11.94  |
| PPIE     | 1.619 | 20.03  |
| PPIF     | 2.201 | 13.66  |
| PPIG     | 2.706 | 19.45  |
| PPIH     | 0.8   | 19.38  |
| PPIHP1   | 0.744 | 3.85   |
| PPIL1    | 1.706 | 11.11  |
| PPIL1P1  | 2.014 | 0.13   |
| PPIL2    | 5.105 | 12.41  |
| PPIL3    | 2.06  | 6.09   |
| PPIL4    | 2.467 | 5.29   |
| PPIL5    | 2.646 | 3.21   |
| PPIL6    | 1.072 | 0.15   |
| PPL      | 6.238 | 0.03   |
| PPM1A    | 3.856 | 7.16   |



|            |        |        |
|------------|--------|--------|
| PPM1B      | 6.731  | 5.63   |
| PPM1D      | 3.163  | 5.97   |
| PPM1E      | 6.54   | 0.13   |
| PPM1F      | 5.151  | 42.23  |
| PPM1G      | 2.36   | 70.89  |
| PPM1H      | 6.451  | 0      |
| PPM1J      | 1.714  | 2.36   |
| PPM1K      | 2.346  | 6.82   |
| PPM1L      | 3.056  | 0.2    |
| PPM1M      | 2.429  | 12     |
| PPM2C      | 4.199  | 1.1    |
| PPME1      | 2.453  | 15.7   |
| PPOX       | 1.694  | 6.47   |
| PPP1CA     | 1.635  | 139.36 |
| PPP1CB     | 9.376  | 6.95   |
| PPP1CC     | 2.264  | 37.06  |
| PPP1R10    | 13.557 | 0      |
| PPP1R11    | 4.821  | 0.02   |
| PPP1R12A   | 4.944  | 8.19   |
| PPP1R12B   | 21.195 | 0.5    |
| PPP1R12BP  | 70.856 | 0.01   |
| PPP1R12C   | 2.924  | 22.99  |
| PPP1R13B   | 4.833  | 6.53   |
| PPP1R13L   | 3.093  | 4.41   |
| PPP1R14A   | 0.718  | 0.47   |
| PPP1R14B   | 0.987  | 47.2   |
| PPP1R14BP1 | 0.59   | 0.71   |
| PPP1R14C   | 2.131  | 0      |
| PPP1R14D   | 0.749  | 0      |
| PPP1R15A   | 2.349  | 128.81 |
| PPP1R15B   | 5.222  | 7.26   |
| PPP1R16A   | 2.274  | 4.11   |
| PPP1R16B   | 6.251  | 16.67  |
| PPP1R1A    | 1.826  | 0.04   |
| PPP1R1B    | 2.869  | 0.44   |
| PPP1R1C    | 1.557  | 0      |
| PPP1R2     | 3.313  | 4.73   |
| PPP1R2P1   | 10.636 | 0      |
| PPP1R2P2   | 1.238  | 0      |
| PPP1R2P3   | 1.991  | 1.1    |
| PPP1R2P9   | 0.87   | 0      |
| PPP1R3A    | 13.553 | 0      |
| PPP1R3B    | 3.807  | 2.46   |
| PPP1R3C    | 2.571  | 0      |
| PPP1R3D    | 3.466  | 0.78   |
| PPP1R3E    | 6.564  | 1.18   |
| PPP1R3F    | 2.941  | 2.23   |
| PPP1R7     | 1.293  | 41.3   |
| PPP1R8     | 3.672  | 14.29  |
| PPP1R8P    | 1.173  | 2.8    |

|          |        |        |
|----------|--------|--------|
| PPP1R9A  | 19.382 | 0      |
| PPP1R9B  | 4.232  | 49.01  |
| PPP2CA   | 2.643  | 35.76  |
| PPP2CB   | 2.205  | 10.74  |
| PPP2CBP  | 1.442  | 0.88   |
| PPP2R1A  | 2.323  | 115.67 |
| PPP2R1B  | 5.873  | 2.42   |
| PPP2R2A  | 2.363  | 14.26  |
| PPP2R2B  | 3.558  | 0.03   |
| PPP2R2C  | 4.186  | 1.39   |
| PPP2R2D  | 2.18   | 13.03  |
| PPP2R3A  | 7.205  | 0.02   |
| PPP2R3B  | 2.786  | 7.62   |
| PPP2R3C  | 1.834  | 7.16   |
| PPP2R4   | 3.021  | 33.1   |
| PPP2R5A  | 3.128  | 12.42  |
| PPP2R5B  | 2.71   | 2.36   |
| PPP2R5C  | 4.855  | 9.8    |
| PPP2R5CP | 1.415  | 5.06   |
| PPP2R5D  | 3.449  | 23.37  |
| PPP2R5E  | 3.366  | 4.58   |
| PPP3CA   | 4.401  | 15.33  |
| PPP3CB   | 3.068  | 12.02  |
| PPP3CC   | 2.189  | 22.16  |
| PPP3R1   | 3.011  | 13.54  |
| PPP3R2   | 3.387  | 0      |
| PPP4C    | 1.33   | 64.35  |
| PPP4R1   | 3.834  | 9.31   |
| PPP4R1L  | 2.325  | 0.61   |
| PPP4R2   | 1.462  | 3.63   |
| PPP5C    | 2.062  | 32.35  |
| PPP6C    | 1.763  | 24.7   |
| PPRC1    | 5.338  | 7.7    |
| PPT1     | 2.33   | 42.69  |
| PPT2     | 7.518  | 0      |
| PPTC7    | 4.056  | 4.13   |
| PPWD1    | 2.094  | 13.27  |
| PPY      | 0.457  | 0      |
| PPY2     | 1.503  | 0      |
| PPYR1    | 1.956  | 0      |
| PQBP1    | 2.108  | 40.96  |
| PQLC1    | 2.441  | 40.34  |
| PQLC2    | 2.659  | 3.1    |
| PQLC3    | 1.788  | 4.15   |
| PQWD     | 1.705  | 0.3    |
| PRAC     | 0.384  | 0      |
| PRAF2    | 1.263  | 26.01  |
| PRAM1    | 2.163  | 1.05   |
| PRAME    | 3.143  | 5.18   |
| PRAMEF1  | 1.606  | 0      |

|          |       |        |
|----------|-------|--------|
| PRAMEF10 | 1.518 | 0      |
| PRAMEF12 | 1.909 | 0      |
| PRAMEF13 | 5.243 | 0      |
| PRAMEF15 | 1.863 | 0      |
| PRAMEF16 | 1.461 | 0      |
| PRAMEF19 | 2.127 | 0      |
| PRAMEF2  | 1.642 | 0      |
| PRAMEF20 | 1.506 | 0      |
| PRAMEF21 | 4.981 | 0      |
| PRAMEF3  | 2.104 | 0      |
| PRAMEF4  | 1.828 | 0      |
| PRAMEF5  | 1.855 | 0      |
| PRAMEF6  | 1.431 | 0      |
| PRAMEF7  | 1.425 | 0      |
| PRAMEF8  | 1.844 | 0      |
| PRAMEF9  | 1.874 | 0      |
| PRAP1    | 0.71  | 0.36   |
| PRB1     | 1.894 | 0      |
| PRB2     | 1.26  | 0      |
| PRB3     | 1.218 | 0.07   |
| PRB4     | 0.915 | 0      |
| PRC1     | 4.378 | 9.42   |
| PRCC     | 2.123 | 33.76  |
| PRCP     | 2.628 | 8.11   |
| PRDM1    | 5.319 | 0.97   |
| PRDM10   | 6.902 | 1.14   |
| PRDM11   | 2.229 | 0.79   |
| PRDM12   | 2.492 | 0      |
| PRDM13   | 3.234 | 0      |
| PRDM14   | 2.209 | 0      |
| PRDM15   | 7.827 | 2.6    |
| PRDM16   | 8.796 | 0      |
| PRDM2    | 9.739 | 4.18   |
| PRDM4    | 4.187 | 3.28   |
| PRDM5    | 2.48  | 0.07   |
| PRDM6    | 2.674 | 0      |
| PRDM7    | 2.442 | 0      |
| PRDM8    | 3.553 | 18.33  |
| PRDM9    | 2.903 | 0      |
| PRDX1    | 1.646 | 368.31 |
| PRDX2    | 1.465 | 25.36  |
| PRDX2P1  | 0.913 | 0.92   |
| PRDX3    | 1.812 | 30.87  |
| PRDX4    | 0.921 | 26.98  |
| PRDX5    | 0.884 | 93.57  |
| PRDX6    | 1.67  | 105.57 |
| PREB     | 2.165 | 21.75  |
| PREI3    | 2.844 | 4.97   |
| PRELID1  | 1.191 | 43.36  |
| PRELID2  | 2.561 | 0.69   |

|          |        |        |
|----------|--------|--------|
| PRELP    | 5.994  | 0.03   |
| PREP     | 2.849  | 12.27  |
| PREPL    | 6.273  | 3.05   |
| PREX1    | 6.633  | 84.37  |
| PRF1     | 2.491  | 3.28   |
| PRG2     | 2.357  | 0.03   |
| PRG3     | 0.868  | 0.29   |
| PRG4     | 0.1    | 16     |
| PRH1     | 0.651  | 1.29   |
| PRH2     | 3.28   | 0.15   |
| PRIC285  | 10.91  | 0.77   |
| PRICKLE1 | 3.293  | 0.18   |
| PRICKLE2 | 8.301  | 0      |
| PRIM1    | 1.462  | 5.25   |
| PRIM2A   | 2.291  | 2.76   |
| PRIMA1   | 3.65   | 0      |
| PRKAA1   | 5.13   | 3.37   |
| PRKAA2   | 2.435  | 0      |
| PRKAB1   | 2.401  | 8.67   |
| PRKAB2   | 5.423  | 1.23   |
| PRKACA   | 2.727  | 31.91  |
| PRKACB   | 5.609  | 5.8    |
| PRKACG   | 1.558  | 0.81   |
| PRKAG1   | 2.861  | 17.46  |
| PRKAG2   | 4.361  | 3.15   |
| PRKAG3   | 2.299  | 0      |
| PRKAR1A  | 3.972  | 32.24  |
| PRKAR1B  | 3.857  | 2.3    |
| PRKAR2A  | 3.167  | 5.51   |
| PRKAR2B  | 7.322  | 0.36   |
| PRKCA    | 8.77   | 21.35  |
| PRKCB1   | 7.468  | 38.33  |
| PRKCD    | 2.835  | 4.31   |
| PRKCDBP  | 1.037  | 0.25   |
| PRKCE    | 5.52   | 5.49   |
| PRKCG    | 3.128  | 0      |
| PRKCH    | 3.506  | 13.03  |
| PRKCI    | 4.874  | 2.19   |
| PRKCQ    | 3.26   | 0.37   |
| PRKCSH   | 2.509  | 130.47 |
| PRKCZ    | 2.921  | 0.17   |
| PRKD1    | 3.68   | 0      |
| PRKD2    | 3.491  | 69.3   |
| PRKD3    | 5.903  | 6.24   |
| PRKDC    | 13.508 | 11.03  |
| PRKG1    | 3.737  | 0      |
| PRKG2    | 3.328  | 0.08   |
| PRKRA    | 1.724  | 10.06  |
| PRKRIP1  | 4.346  | 6.26   |
| PRKRIR   | 3.19   | 9.5    |

|           |        |        |
|-----------|--------|--------|
| PRKX      | 6.043  | 3.34   |
| PRKXP1    | 6.573  | 0.36   |
| PRKY      | 7.216  | 3.83   |
| PRL       | 1.354  | 0      |
| PRLH      | 0.264  | 0      |
| PRLHR     | 1.113  | 0      |
| PRLR      | 3.145  | 0      |
| PRM1      | 0.394  | 0      |
| PRM2      | 0.683  | 0      |
| PRM3      | 0.474  | 0      |
| PRMT1     | 1.517  | 111.44 |
| PRMT2     | 2.603  | 23.3   |
| PRMT3     | 2.6    | 2.52   |
| PRMT5     | 2.671  | 25.89  |
| PRMT6     | 2.506  | 9.18   |
| PRMT7     | 2.39   | 20.23  |
| PRMT8     | 3.108  | 2.03   |
| PRND      | 3.98   | 0      |
| PRNP      | 2.554  | 17.95  |
| PRNPIP    | 1.743  | 21.94  |
| PRNT      | 2.333  | 0      |
| PRO0132   | 2.136  | 0      |
| PRO0611   | 0.57   | 0      |
| PRO0628   | 1.175  | 0.07   |
| PRO1853   | 3.392  | 1.39   |
| PRO2266   | 0.914  | 4.24   |
| PROC      | 1.755  | 0.09   |
| PROCA1    | 1.247  | 3.37   |
| PROCR     | 1.452  | 2.61   |
| PRODH     | 2.4    | 0      |
| PRODH2    | 1.677  | 0      |
| PROK1     | 1.372  | 0      |
| PROK2     | 1.404  | 0      |
| PROKR1    | 1.182  | 0      |
| PROKR2    | 1.255  | 9.19   |
| PROL1     | 0.946  | 0      |
| PROM1     | 3.794  | 0.08   |
| PROM2     | 3.822  | 0.07   |
| PROP1     | 1.464  | 0      |
| PROS1     | 3.275  | 0.26   |
| ProSAPiP1 | 5.247  | 4.71   |
| PROSC     | 2.995  | 11.34  |
| PROSP     | 33.856 | 0      |
| PROX1     | 3.075  | 0      |
| PROX2     | 1.779  | 0.85   |
| PROZ      | 1.485  | 0.45   |
| PRPF18    | 1.705  | 7.27   |
| PRPF19    | 2.153  | 83.33  |
| PRPF3     | 2.34   | 12.92  |
| PRPF31    | 2.128  | 33.45  |

|         |       |       |
|---------|-------|-------|
| PRPF38A | 3.342 | 16.41 |
| PRPF38B | 3.238 | 18.7  |
| PRPF39  | 3.179 | 4.79  |
| PRPF4   | 2.735 | 14.2  |
| PRPF40A | 8.28  | 6.31  |
| PRPF40B | 4.719 | 5.43  |
| PRPF4B  | 7.482 | 6.79  |
| PRPF6   | 3.101 | 58.3  |
| PRPF8   | 7.295 | 63    |
| PRPH    | 1.833 | 0     |
| PRPH2   | 2.971 | 0.03  |
| PRPS1   | 2.051 | 17.7  |
| PRPS1L1 | 2.178 | 0.46  |
| PRPS2   | 2.702 | 3.65  |
| PRPSAP1 | 1.728 | 19.31 |
| PRPSAP2 | 1.89  | 7.27  |
| PRR10   | 1.768 | 0     |
| PRR11   | 1.317 | 11.38 |
| PRR12   | 7.396 | 9.16  |
| PRR13   | 1.554 | 74.91 |
| PRR14   | 2.118 | 12.76 |
| PRR15   | 3.355 | 0.25  |
| PRR16   | 1.764 | 0     |
| PRR17   | 1.466 | 0.17  |
| PRR3    | 6.762 | 0     |
| PRR4    | 0.507 | 4.49  |
| PRR5    | 2.574 | 2.26  |
| PRR6    | 1.164 | 4.63  |
| PRR7    | 1.478 | 2.57  |
| PRR8    | 8.72  | 2.24  |
| PRRC1   | 4.644 | 7.69  |
| PRRG1   | 4.457 | 0     |
| PRRG2   | 1.168 | 1.08  |
| PRRG3   | 1.594 | 0     |
| PRRG4   | 1.985 | 0.04  |
| PRRT1   | 5.688 | 0.02  |
| PRRT2   | 2.372 | 0.14  |
| PRRT3   | 3.368 | 1.85  |
| PRRX1   | 7.424 | 0.01  |
| PRRX2   | 1.311 | 0.07  |
| PRSS1   | 1.6   | 0     |
| PRSS12  | 3.349 | 0     |
| PRSS16  | 2.71  | 0     |
| PRSS2   | 1.604 | 0.42  |
| PRSS21  | 1.565 | 23.52 |
| PRSS22  | 1.386 | 0     |
| PRSS23  | 3.734 | 0.14  |
| PRSS27  | 1.462 | 0.29  |
| PRSS29P | 3.002 | 0     |
| PRSS3   | 0.807 | 0     |

|          |       |        |
|----------|-------|--------|
| PRSS33   | 1.598 | 0      |
| PRSS35   | 2.426 | 0.07   |
| PRSS36   | 2.809 | 1.29   |
| PRSS7    | 3.687 | 0      |
| PRSS8    | 1.938 | 0      |
| PRSSL1   | 1.089 | 47.34  |
| PRTFDC1  | 1.926 | 0.61   |
| PRTG     | 4.115 | 0      |
| PRTN3    | 1.001 | 20.45  |
| PRUNE    | 2.977 | 9.06   |
| PRUNE2   | 1.257 | 0      |
| PRX      | 9.902 | 23.7   |
| PRY      | 1.238 | 0      |
| PRY2     | 1.238 | 0      |
| PS3      | 1.646 | 0      |
| PS5      | 0.923 | 0      |
| PSAP     | 2.746 | 228.51 |
| PSAT1    | 2.188 | 1.58   |
| PSCA     | 1.02  | 0.33   |
| PSCD1    | 3.309 | 46.79  |
| PSCD2    | 1.534 | 31.9   |
| PSCD3    | 8.938 | 4.59   |
| PSCD4    | 3.202 | 32.8   |
| PSCDBP   | 2.21  | 2.59   |
| PSD      | 4.183 | 0      |
| PSD2     | 4.51  | 0.03   |
| PSD3     | 15.56 | 3.12   |
| PSD4     | 5.039 | 19.49  |
| PSEN1    | 3.24  | 14.25  |
| PSEN2    | 2.314 | 0.25   |
| PSEENEN  | 0.665 | 66.12  |
| PSG1     | 2.276 | 0      |
| PSG11    | 1.995 | 0      |
| PSG2     | 1.523 | 0      |
| PSG3     | 1.86  | 0.04   |
| PSG4     | 2.032 | 0      |
| PSG5     | 1.607 | 0      |
| PSG6     | 1.849 | 0      |
| PSG7     | 1.99  | 0      |
| PSG8     | 1.281 | 0      |
| PSG9     | 1.701 | 0      |
| PSIP1    | 4.016 | 9.82   |
| PSIP1P   | 1.637 | 3.86   |
| psiSSX1  | 7.44  | 0      |
| psiSSX10 | 1.32  | 0      |
| psiSSX2  | 2.16  | 0      |
| psiSSX3  | 10.44 | 0      |
| psiSSX4  | 1.5   | 0      |
| psiSSX5  | 6.06  | 0      |
| psiSSX6  | 0.1   | 0      |

|           |       |        |
|-----------|-------|--------|
| psiSSX7   | 1.459 | 0      |
| psiSSX8   | 2.76  | 0      |
| psiSSX9   | 6.18  | 0      |
| psiTPTE22 | 48.35 | 0.48   |
| PSKH1     | 3.441 | 14.17  |
| PSKH2     | 1.158 | 0      |
| PSMA1     | 1.56  | 37.74  |
| PSMA2     | 2.932 | 24.27  |
| PSMA3     | 1.525 | 15.86  |
| PSMA3P    | 0.741 | 2.04   |
| PSMA4     | 1.174 | 53.96  |
| PSMA5     | 0.974 | 50.77  |
| PSMA6     | 1.018 | 208.85 |
| PSMA6P    | 0.979 | 110.82 |
| PSMA7     | 0.984 | 113    |
| PSMA7P    | 0.406 | 1.66   |
| PSMA8     | 1.967 | 0      |
| psMAGEA   | 5.114 | 0      |
| PSMAL     | 1.974 | 0      |
| PSMB1     | 0.882 | 91.39  |
| PSMB10    | 0.979 | 107.21 |
| PSMB2     | 0.845 | 75.37  |
| PSMB3     | 0.754 | 89.04  |
| PSMB3P    | 0.581 | 6.82   |
| PSMB4     | 0.925 | 167.29 |
| PSMB5     | 1.049 | 42.64  |
| PSMB6     | 0.826 | 74.55  |
| PSMB7     | 3.966 | 32.65  |
| PSMB8     | 5.319 | 0.03   |
| PSMB9     | 3.236 | 0.03   |
| PSMC1     | 1.586 | 3.08   |
| PSMC1P    | 1.558 | 9.95   |
| PSMC2     | 3.054 | 12.44  |
| PSMC3     | 1.545 | 63.13  |
| PSMC3IP   | 2.248 | 2.36   |
| PSMC3P    | 1.305 | 17.43  |
| PSMC4     | 1.529 | 30.58  |
| PSMC5     | 1.32  | 83.53  |
| PSMC6     | 1.571 | 8.53   |
| PSMC6P    | 1.536 | 8.56   |
| PSMD1     | 3.227 | 19.78  |
| PSMD10    | 2.555 | 14.05  |
| PSMD10P   | 0.669 | 0.38   |
| PSMD11    | 1.863 | 17     |
| PSMD12    | 3.592 | 4.65   |
| PSMD13    | 2.008 | 41.32  |
| PSMD14    | 1.261 | 20.38  |
| PSMD15    | 1.563 | 3.23   |
| PSMD2     | 2.922 | 48.58  |
| PSMD3     | 2.147 | 77.92  |



|          |        |        |
|----------|--------|--------|
| PSMD4    | 2.075  | 48.15  |
| PSMD4P2  | 3.406  | 10.37  |
| PSMD5    | 3.387  | 5.07   |
| PSMD6    | 1.308  | 43.86  |
| PSMD7    | 1.662  | 32.28  |
| PSMD8    | 1.508  | 70.49  |
| PSMD9    | 2.343  | 21.89  |
| PSME1    | 1.489  | 106.69 |
| PSME2    | 0.829  | 73.36  |
| PSME2P   | 0.78   | 16.74  |
| PSME3    | 3.281  | 39.82  |
| PSME4    | 6.605  | 4.84   |
| PSMF1    | 5.855  | 25.14  |
| PSORS1C1 | 2.581  | 0      |
| PSORS1C2 | 3.428  | 0      |
| PSPC1    | 1.709  | 22.18  |
| PSPH     | 4.236  | 3.54   |
| PSPN     | 0.471  | 0.71   |
| PSRC1    | 3.168  | 3.19   |
| PSTPIP1  | 1.766  | 4.58   |
| PSTPIP2  | 3.002  | 18.77  |
| PTAFR    | 1.822  | 0.32   |
| PTAR1    | 1.413  | 1.25   |
| PTBP1    | 3.319  | 87.21  |
| PTBP1P   | 0.652  | 8.79   |
| PTBP2    | 3.027  | 1.73   |
| PTCD1    | 6.158  | 2.9    |
| PTCD2    | 2.177  | 1.39   |
| PTCD3    | 6.701  | 4.75   |
| PTCH1    | 6.82   | 0.57   |
| PTCH2    | 3.624  | 0.28   |
| PTCHD1   | 2.682  | 0      |
| PTCHD2   | 5.655  | 0.57   |
| PTCHD3   | 2.368  | 0      |
| PTCRA    | 1.08   | 0.15   |
| PTDSS1   | 2.504  | 45.75  |
| PTDSS2   | 2.445  | 10.51  |
| PTEN     | 4.256  | 28.6   |
| PTENP1   | 1.212  | 15.29  |
| PTER     | 3.872  | 1.8    |
| PTF1A    | 0.987  | 0      |
| PTGDR    | 3.196  | 6.38   |
| PTGDS    | 0.812  | 0.93   |
| PTGER1   | 1.421  | 0      |
| PTGER2   | 2.383  | 6.22   |
| PTGER3   | 10.994 | 0.01   |
| PTGER4   | 3.416  | 0.25   |
| PTGES    | 1.79   | 0      |
| PTGES2   | 3.167  | 11.94  |
| PTGES3   | 1.718  | 59.67  |

|         |         |        |
|---------|---------|--------|
| PTGFR   | 9.727   | 0      |
| PTGFRN  | 6.16    | 1.56   |
| PTGIR   | 2.086   | 21.04  |
| PTGIS   | 5.603   | 6.45   |
| PTGS1   | 5.269   | 2.09   |
| PTGS2   | 4.465   | 0      |
| PTH     | 0.814   | 0      |
| PTHLH   | 3.062   | 0.14   |
| PTHR1   | 2.128   | 0.04   |
| PTHR2   | 2.713   | 0      |
| PTK2    | 4.758   | 11.95  |
| PTK2B   | 4.86    | 81.29  |
| PTK6    | 2.519   | 0      |
| PTK7    | 4.36    | 14.18  |
| PTK9P   | 2.954   | 0.91   |
| PTMA    | 1.202   | 508.22 |
| PTMAP1  | 2.583   | 0      |
| PTMAP2  | 1.514   | 2.39   |
| PTMAP3  | 1.392   | 2.48   |
| PTMAP4  | 1.286   | 1.96   |
| PTMAP6  | 0.17    | 0.49   |
| PTMAP7  | 1.06    | 108.79 |
| PTMS    | 1.15    | 39.99  |
| PTN     | 3.098   | 0      |
| PTOV1   | 1.587   | 52.18  |
| PTP4A1  | 5.082   | 11.14  |
| PTP4A2  | 4.015   | 32.52  |
| PTP4A3  | 2.813   | 80.22  |
| PTP4AP1 | 1.082   | 3.82   |
| PTP4AP2 | 1.395   | 1.02   |
| PTPDC1  | 4.82    | 0.89   |
| PTPLA   | 1.307   | 15.59  |
| PTPLAD1 | 2.915   | 23.21  |
| PTPLAD2 | 4.081   | 5.74   |
| PTPLB   | 4.261   | 8.22   |
| PTPN1   | 3.318   | 23.51  |
| PTPN11  | 6.283   | 12.87  |
| PTPN12  | 6.851   | 8.49   |
| PTPN13  | 8.266   | 0      |
| PTPN14  | 6.4     | 9.24   |
| PTPN18  | 2.793   | 76.49  |
| PTPN2   | 3.278   | 7.27   |
| PTPN20A | 4.849   | 0      |
| PTPN20B | 2.478   | 0      |
| PTPN20C | 106.807 | 0      |
| PTPN21  | 4.223   | 0      |
| PTPN22  | 3.867   | 0.82   |
| PTPN23  | 5.222   | 11.94  |
| PTPN3   | 4.084   | 3.54   |
| PTPN4   | 3.943   | 0.64   |

|         |        |       |
|---------|--------|-------|
| PTPN5   | 3.215  | 0     |
| PTPN6   | 2.4    | 46.19 |
| PTPN7   | 3.516  | 28.92 |
| PTPN9   | 3.938  | 13.32 |
| PTPNS1L | 2.487  | 1.36  |
| PTPRA   | 3.942  | 27.75 |
| PTPRB   | 6.329  | 0     |
| PTPRC   | 5.887  | 9.87  |
| PTPRCAP | 0.907  | 430   |
| PTPRD   | 6.252  | 0     |
| PTPRE   | 5.491  | 10.44 |
| PTPRF   | 7.697  | 6.54  |
| PTPRG   | 5.771  | 3.66  |
| PTPRH   | 3.895  | 0.04  |
| PTPRJ   | 5.884  | 4.52  |
| PTPRK   | 5.983  | 0     |
| PTPRM   | 5.053  | 0.08  |
| PTPRN   | 3.632  | 0     |
| PTPRN2  | 9.512  | 0.19  |
| PTPRO   | 8.003  | 0.22  |
| PTPRQ   | 10.103 | 0     |
| PTPRR   | 3.887  | 0     |
| PTPRS   | 6.501  | 0.03  |
| PTPRT   | 12.703 | 0     |
| PTPRU   | 5.783  | 0.04  |
| PTPRV   | 25.302 | 0.03  |
| PTPRZ1  | 16.315 | 0     |
| PTRF    | 3.562  | 0.43  |
| PTRH1   | 0.815  | 7.34  |
| PTRH2   | 2.117  | 5.53  |
| PTS     | 0.921  | 4.48  |
| PTS-P1  | 0.566  | 0     |
| PTTG1   | 0.712  | 38.33 |
| PTTG1IP | 2.736  | 33.96 |
| PTTG2   | 0.576  | 1.61  |
| PTTG3   | 0.609  | 5.81  |
| PTTG4P  | 0.48   | 0     |
| PTX3    | 1.871  | 0.49  |
| PUM1    | 5.514  | 11.72 |
| PUM2    | 6.111  | 13.75 |
| PUNC    | 3.103  | 0     |
| PURA    | 2.614  | 2.45  |
| PURB    | 18.142 | 1.96  |
| PURG    | 4.651  | 0     |
| PUS1    | 2.563  | 24.25 |
| PUS3    | 1.833  | 3.99  |
| PUS7    | 6.968  | 1.32  |
| PUS7L   | 3.943  | 1.16  |
| PUSL1   | 1.24   | 4.08  |
| PVALB   | 0.572  | 0.44  |



|           |        |        |
|-----------|--------|--------|
| RAB10     | 3.495  | 18.58  |
| RAB11A    | 2.627  | 40.5   |
| RAB11B    | 1.546  | 74.65  |
| RAB11FIP1 | 12.068 | 1.48   |
| RAB11FIP2 | 6.059  | 1.03   |
| RAB11FIP3 | 4.252  | 6.04   |
| RAB11FIP4 | 8.625  | 0.44   |
| RAB11FIP5 | 4.34   | 11.74  |
| RAB12     | 5.068  | 0.33   |
| RAB13     | 1.154  | 130.59 |
| RAB14     | 4.089  | 18.02  |
| RAB15     | 3.312  | 58.6   |
| RAB17     | 1.98   | 0.85   |
| RAB18     | 2.79   | 4.96   |
| RAB19B    | 1.59   | 0.31   |
| RAB1A     | 3.772  | 21.55  |
| RAB1B     | 1.906  | 84.41  |
| RAB1C     | 0.606  | 29.19  |
| RAB20     | 1.509  | 10.38  |
| RAB21     | 2.627  | 8.31   |
| RAB22A    | 8.651  | 2.06   |
| RAB23     | 3.153  | 0.91   |
| RAB24     | 4.108  | 20.36  |
| RAB25     | 1.022  | 0      |
| RAB26     | 1.624  | 0.26   |
| RAB27A    | 3.294  | 4.73   |
| RAB27B    | 1.336  | 0.06   |
| RAB28     | 1.847  | 3.38   |
| RAB2A     | 1.148  | 22.75  |
| RAB2B     | 2.308  | 7.48   |
| RAB30     | 1.602  | 0.74   |
| RAB31     | 3.952  | 2.77   |
| RAB32     | 1.206  | 0.56   |
| RAB33A    | 1.108  | 0      |
| RAB33B    | 3.869  | 1.13   |
| RAB34     | 1.74   | 42.56  |
| RAB35     | 2.897  | 25.24  |
| RAB36     | 3.822  | 0.35   |
| RAB37     | 4.214  | 9.8    |
| RAB38     | 1.408  | 0.12   |
| RAB39     | 1.782  | 0.14   |
| RAB39B    | 3.483  | 0.92   |
| RAB3A     | 1.466  | 1.95   |
| RAB3B     | 1.552  | 0.38   |
| RAB3C     | 1.009  | 0      |
| RAB3D     | 1.879  | 1.79   |
| RAB3GAP1  | 4.361  | 12.15  |
| RAB3GAP2  | 5.121  | 2.52   |
| RAB3IL1   | 2.284  | 2.47   |
| RAB3IP    | 18.29  | 0.04   |

|          |       |        |
|----------|-------|--------|
| RAB40A   | 1.346 | 0      |
| RAB40B   | 1.668 | 1.77   |
| RAB40C   | 2.612 | 7.61   |
| RAB41    | 1.028 | 0      |
| RAB42    | 1.093 | 0      |
| RAB43    | 4.447 | 18.24  |
| RAB43P   | 1.187 | 7.24   |
| RAB4A    | 1.843 | 10.74  |
| RAB4B    | 1.14  | 50.91  |
| RAB5A    | 2.339 | 9.44   |
| RAB5B    | 3.742 | 55.58  |
| RAB5C    | 1.772 | 111.38 |
| RAB6A    | 3.514 | 9.64   |
| RAB6B    | 5.222 | 0.4    |
| RAB6IP1  | 4.965 | 15.95  |
| RAB7A    | 2.232 | 84.8   |
| RAB7L1   | 2.444 | 5.48   |
| RAB8A    | 2.177 | 54.68  |
| RAB8B    | 4.877 | 2.46   |
| RAB9A    | 1.081 | 15.35  |
| RAB9B    | 1.049 | 0.72   |
| RAB9P1   | 0.625 | 0      |
| RABAC1   | 0.751 | 77.73  |
| RABEP1   | 5.367 | 10.66  |
| RABEP2   | 2.643 | 19.86  |
| RABEPK   | 1.437 | 13.07  |
| RABGAP1  | 4.849 | 6.69   |
| RABGAP1L | 3.31  | 5.63   |
| RABGEF1  | 7.466 | 2.6    |
| RABGGTA  | 2.368 | 10.74  |
| RABGGTB  | 1.496 | 8.22   |
| RABIF    | 2.43  | 4.61   |
| RABL2A   | 2.312 | 5.58   |
| RABL2B   | 2.338 | 6.59   |
| RABL3    | 3.337 | 3      |
| RABL4    | 1.021 | 11.88  |
| RABL5    | 4.728 | 2.6    |
| RAC1     | 6.342 | 22.9   |
| RAC1P1   | 0.888 | 0      |
| RAC1P2   | 0.938 | 54.87  |
| RAC1P3   | 1.661 | 0.1    |
| RAC1P4   | 0.985 | 0.6    |
| RAC1P5   | 0.775 | 0      |
| RAC2     | 1.468 | 135.65 |
| RAC3     | 1.06  | 3.02   |
| RACGAP1  | 3.229 | 12.47  |
| RACGAP1P | 2.794 | 0.94   |
| RAD1     | 5.025 | 2.06   |
| RAD17    | 7.912 | 1.4    |
| RAD17P1  | 5.092 | 0.05   |

|          |        |       |
|----------|--------|-------|
| RAD17P2  | 2.958  | 0.06  |
| RAD18    | 3.046  | 3.02  |
| RAD21    | 3.645  | 34.92 |
| RAD23A   | 1.793  | 65.91 |
| RAD23B   | 4.13   | 21.74 |
| RAD50    | 6.658  | 3.21  |
| RAD51    | 2.407  | 3.88  |
| RAD51AP1 | 2.113  | 3.59  |
| RAD51AP2 | 3.701  | 0     |
| RAD51C   | 1.686  | 7.34  |
| RAD51L1  | 3.717  | 1.16  |
| RAD51L3  | 2.384  | 3.6   |
| RAD52    | 3.37   | 7.18  |
| RAD54B   | 3.041  | 0.81  |
| RAD54L   | 3.096  | 4     |
| RAD54L2  | 5.181  | 4.52  |
| RAD9A    | 2.122  | 8.65  |
| RAD9B    | 2.879  | 0.14  |
| RAE1     | 2.17   | 12.85 |
| RAET1E   | 0.885  | 0     |
| RAET1F   | 0.463  | 0     |
| RAET1G   | 0.939  | 0     |
| RAET1L   | 0.741  | 0.11  |
| RAF1     | 3.245  | 20.9  |
| RAF1P1   | 1.734  | 0     |
| RAG1     | 6.571  | 34.66 |
| RAG1AP1  | 1.298  | 28.42 |
| RAG2     | 2.388  | 7.72  |
| RAGE     | 1.934  | 0.57  |
| RAI1     | 7.662  | 2.23  |
| RAI14    | 4.901  | 16.98 |
| RAI16    | 3.731  | 8.26  |
| RAI2     | 2.337  | 0     |
| RALA     | 5.592  | 4.22  |
| RALB     | 2.261  | 43.81 |
| RALBP1   | 4.354  | 25.75 |
| RALGDS   | 3.632  | 20.32 |
| RALGPS1  | 6.336  | 0.31  |
| RALGPS2  | 3.504  | 0.55  |
| RALY     | 1.575  | 129   |
| RAMP1    | 0.91   | 0.19  |
| RAMP2    | 0.78   | 0.43  |
| RAMP3    | 2.624  | 0.07  |
| RAN      | 1.657  | 74.68 |
| RANBP1   | 0.884  | 39.93 |
| RANBP10  | 5.305  | 8.23  |
| RANBP17  | 4.44   | 0     |
| RANBP2   | 10.695 | 4.81  |
| RANBP20P | 2.337  | 1.73  |
| RANBP3   | 4.263  | 15.33 |

|          |        |       |
|----------|--------|-------|
| RANBP3L  | 2.536  | 2.99  |
| RANBP5   | 6.002  | 22.99 |
| RANBP6   | 4.6    | 3.84  |
| RANBP9   | 3.113  | 15.04 |
| RANGAP1  | 3.021  | 35.02 |
| RANGNRF  | 0.988  | 17.31 |
| RANP1    | 3.15   | 0     |
| RAP1A    | 1.906  | 11.23 |
| RAP1AP   | 1.22   | 5.45  |
| RAP1B    | 2.279  | 34.45 |
| RAP1GAP  | 3.27   | 1.05  |
| RAP1GDS1 | 2.47   | 7.47  |
| RAP2A    | 4.351  | 3.91  |
| RAP2B    | 6.237  | 3.7   |
| RAP2C    | 3.933  | 2.35  |
| RAPGEF1  | 6.308  | 12.64 |
| RAPGEF2  | 9.058  | 1.86  |
| RAPGEF3  | 3.312  | 8.24  |
| RAPGEF4  | 4.261  | 0.89  |
| RAPGEF5  | 6.305  | 3.04  |
| RAPGEF6  | 6.37   | 1.33  |
| RAPGEFL1 | 3.356  | 0.73  |
| RAPH1    | 10.748 | 0.05  |
| RAPSN    | 1.664  | 0.36  |
| RARA     | 5.115  | 11.81 |
| RARB     | 3.54   | 0.17  |
| RARG     | 2.9    | 6.97  |
| RARRES1  | 1.803  | 0     |
| RARRES2  | 1.346  | 0.56  |
| RARRES3  | 0.758  | 8.12  |
| RARS     | 2.14   | 11.38 |
| RARS2    | 1.813  | 6.65  |
| RASA1    | 4.402  | 4.23  |
| RASA2    | 2.592  | 1.85  |
| RASA3    | 4.2    | 10.37 |
| RASA4    | 11.152 | 0.36  |
| RASAL1   | 3.124  | 0.21  |
| RASAL2   | 5.545  | 3.6   |
| RASD1    | 1.746  | 64.6  |
| RASD2    | 2.973  | 2.15  |
| RASEF    | 2.761  | 1     |
| RASGEF1A | 3.235  | 0.44  |
| RASGEF1B | 2.269  | 0.08  |
| RASGEF1C | 3.484  | 0     |
| RASGRF1  | 5.34   | 0.02  |
| RASGRF2  | 4.078  | 0     |
| RASGRP1  | 4.948  | 0.29  |
| RASGRP2  | 3.803  | 94.18 |
| RASGRP3  | 4.554  | 10.1  |
| RASGRP4  | 3.606  | 0.21  |



|         |       |       |
|---------|-------|-------|
| RASIP1  | 3.302 | 16.4  |
| RASL10A | 2.548 | 2.31  |
| RASL10B | 3.115 | 0.25  |
| RASL11A | 1.543 | 0.43  |
| RASL11B | 1.957 | 0     |
| RASL12  | 2.578 | 0.13  |
| RASSF1  | 4.123 | 9.09  |
| RASSF2  | 9.698 | 5.64  |
| RASSF3  | 2.629 | 17.85 |
| RASSF4  | 2.495 | 3.99  |
| RASSF5  | 8.573 | 7.86  |
| RASSF6  | 4.552 | 0     |
| RASSF7  | 1.53  | 10.57 |
| RASSF8  | 2.32  | 3.56  |
| RAVER1  | 3.388 | 40.23 |
| RAVER2  | 5.593 | 16.73 |
| RAX     | 1.712 | 0     |
| RAXL1   | 2.414 | 0     |
| RB1     | 4.74  | 13.45 |
| RB1CC1  | 6.633 | 2.54  |
| RBAK    | 8.458 | 0.51  |
| RBBP4   | 2.31  | 52.36 |
| RBBP5   | 3.683 | 3.29  |
| RBBP6   | 7.294 | 9.36  |
| RBBP7   | 2.155 | 29.94 |
| RBBP8   | 4.102 | 3.96  |
| RBBP9   | 3.861 | 2.16  |
| RBCK1   | 3.383 | 20.82 |
| RBED1   | 2.675 | 4.28  |
| RBJ     | 4.853 | 0.35  |
| RBKS    | 1.196 | 1.2   |
| RBL1    | 4.563 | 1.16  |
| RBL2    | 4.837 | 13.61 |
| RBM10   | 3.756 | 29.33 |
| RBM11   | 1.952 | 0.04  |
| RBM12   | 7.802 | 12.64 |
| RBM12B  | 4.708 | 3.37  |
| RBM13   | 3.54  | 4.31  |
| RBM14   | 2.78  | 41.03 |
| RBM15   | 3.431 | 2.16  |
| RBM15B  | 7.234 | 16.38 |
| RBM16   | 5.004 | 13.47 |
| RBM17   | 2.698 | 34.47 |
| RBM18   | 1.066 | 7.5   |
| RBM19   | 4.134 | 5.22  |
| RBM20   | 7.108 | 0.08  |
| RBM22   | 2.297 | 26.29 |
| RBM23   | 2.413 | 35.36 |
| RBM24   | 2.37  | 0     |
| RBM25   | 4.172 | 16.55 |

|          |        |       |
|----------|--------|-------|
| RBM26    | 3.624  | 10.09 |
| RBM28    | 5.616  | 2.8   |
| RBM3     | 2.606  | 34.26 |
| RBM33    | 14.11  | 3.15  |
| RBM34    | 1.402  | 17.12 |
| RBM35A   | 4.598  | 0     |
| RBM35B   | 4.684  | 11.36 |
| RBM38    | 4.172  | 49.95 |
| RBM39    | 3.415  | 43.44 |
| RBM4     | 1.644  | 81.93 |
| RBM41    | 1.662  | 1.32  |
| RBM43    | 2.72   | 0.78  |
| RBM4B    | 1.723  | 8.75  |
| RBM5     | 3.1    | 35.22 |
| RBM6     | 3.621  | 27.97 |
| RBM7     | 1.917  | 3.69  |
| RBM8A    | 2.787  | 29.01 |
| RBM8B    | 2.787  | 15.32 |
| RBM9     | 2.632  | 1.5   |
| RBMS1    | 3.37   | 1.68  |
| RBMS1P   | 1.394  | 4.72  |
| RBMS2    | 1.997  | 2.82  |
| RBMS3    | 3.218  | 0.94  |
| RBMX     | 3.182  | 48.36 |
| RBMX2    | 1.775  | 14.1  |
| RBMXL1   | 3.877  | 5.82  |
| RBMXP1   | 1.884  | 0.63  |
| RBMXP2   | 1.853  | 2.78  |
| RBMY1A1  | 2.276  | 0     |
| RBMY1A3P | 6.241  | 0     |
| RBMY1B   | 1.887  | 0     |
| RBMY1D   | 1.881  | 0     |
| RBMY1E   | 1.881  | 0     |
| RBMY1F   | 1.881  | 0     |
| RBMY1H   | 8.919  | 0     |
| RBMY1J   | 1.88   | 0     |
| RBMY2AP  | 12.125 | 0     |
| RBMY2BP  | 8.063  | 0     |
| RBMY2CP  | 12.13  | 0     |
| RBMY2DP  | 12.13  | 0     |
| RBMY2EP  | 6.949  | 0     |
| RBMY2GP  | 15.396 | 0     |
| RBMY2HP  | 6.511  | 0     |
| RBMY2JP  | 17.507 | 0.01  |
| RBMY2KP  | 14.971 | 0     |
| RBMY2MP  | 12.127 | 0     |
| RBMY2NP  | 4.623  | 0     |
| RBMY2OP  | 8.297  | 0     |
| RBMY2QP  | 13.075 | 0     |
| RBMY2SP  | 8.275  | 0     |

|         |       |       |
|---------|-------|-------|
| RBMY2TP | 7.024 | 0     |
| RBMY2UP | 3.556 | 0     |
| RBMY2VP | 6.531 | 0     |
| RBMY2WP | 7.567 | 0     |
| RBMY2XP | 7.557 | 0     |
| RBMY2YP | 7.566 | 0     |
| RBMY3AP | 4.75  | 0     |
| RBP1    | 0.713 | 0.12  |
| RBP2    | 0.688 | 0     |
| RBP3    | 4.276 | 0     |
| RBP4    | 0.929 | 0.18  |
| RBP5    | 0.94  | 0.54  |
| RBP7    | 0.636 | 0.26  |
| RBPJ    | 3.884 | 9.42  |
| RBPJL   | 2.491 | 0     |
| RBPJP1  | 1.118 | 0     |
| RBPMS   | 3.534 | 4.32  |
| RBPMS2  | 1.996 | 0.34  |
| RBX1    | 0.521 | 29.11 |
| RC3H1   | 5.431 | 1.15  |
| RC3H2   | 3.139 | 4.67  |
| RC74    | 2.54  | 11.91 |
| RCBTB1  | 4.033 | 17.32 |
| RCBTB2  | 3.175 | 10.32 |
| RCC1    | 2.706 | 39.69 |
| RCC2    | 4.064 | 46.74 |
| RCCD1   | 2.767 | 7.06  |
| RCE1    | 1.78  | 9.98  |
| RCHY1   | 7.968 | 0.93  |
| RCL1    | 2.063 | 9.76  |
| RCN1    | 2.107 | 15.36 |
| RCN2    | 1.705 | 18.87 |
| RCN3    | 1.854 | 14.91 |
| RCOR1   | 2.889 | 8.25  |
| RCOR2   | 3.984 | 9.33  |
| RCOR3   | 4.359 | 4.73  |
| RCP9    | 2.382 | 4.88  |
| RCS1    | 6.79  | 69.21 |
| RCVRN   | 1.175 | 0     |
| RD3     | 3.349 | 0     |
| RDBP    | 4.682 | 0     |
| RDH10   | 2.736 | 0.28  |
| RDH11   | 2.518 | 29.84 |
| RDH12   | 1.724 | 0.44  |
| RDH13   | 1.991 | 2.58  |
| RDH14   | 1.538 | 5.04  |
| RDH16   | 2.405 | 0.35  |
| RDH5    | 1.23  | 0.96  |
| RDH8    | 1.714 | 0     |
| RDHE2   | 3.039 | 0     |

|          |        |       |
|----------|--------|-------|
| RDM1     | 1.364  | 0.68  |
| RDX      | 4.49   | 4.45  |
| RDXP2    | 2.719  | 0.19  |
| REC8L1   | 2.229  | 8.77  |
| RECK     | 4.412  | 3.42  |
| RECQL    | 3.122  | 5.37  |
| RECQL4   | 3.628  | 3.9   |
| RECQL5   | 8.009  | 3.53  |
| REEP1    | 3.851  | 0.04  |
| REEP2    | 2.099  | 0.04  |
| REEP3    | 2.294  | 4.11  |
| REEP4    | 1.694  | 12.98 |
| REEP5    | 2.997  | 15.63 |
| REEP6    | 1.373  | 0.55  |
| REG1A    | 0.808  | 0     |
| REG1B    | 0.773  | 0     |
| REG3A    | 1.073  | 0     |
| REG3G    | 0.953  | 0     |
| REG4     | 1.276  | 0     |
| REGL     | 2.925  | 0     |
| REL      | 2.592  | 0.94  |
| RELA     | 2.407  | 40.32 |
| RELB     | 2.27   | 3.23  |
| RELN     | 23.128 | 0.04  |
| REM1     | 1.656  | 0     |
| REM2     | 1.85   | 0     |
| REN      | 1.461  | 0     |
| RENBP    | 1.47   | 13.41 |
| REP15    | 1.139  | 0.3   |
| REPIN1   | 9.602  | 22.44 |
| REPS1    | 3.548  | 32.24 |
| REPS2    | 2.285  | 0     |
| RER1     | 1.404  | 30.78 |
| RERE     | 8.026  | 18.54 |
| RERG     | 2.217  | 0     |
| RESP18   | 0.669  | 0     |
| REST     | 3.969  | 4.84  |
| RET      | 5.687  | 0.08  |
| RETN     | 0.478  | 12.69 |
| RETNLB   | 1.246  | 0     |
| RETSAT   | 3.001  | 19.51 |
| REV1     | 4.84   | 4.84  |
| REV3L    | 10.92  | 1.46  |
| REXO1    | 4.577  | 10.21 |
| REXO1L1  | 6.598  | 0     |
| REXO1L2P | 1.786  | 0     |
| REXO1L3P | 2.062  | 0     |
| REXO1L5P | 2.062  | 0     |
| REXO1L6P | 2.062  | 0     |
| REXO1L7P | 1.78   | 0     |

|         |        |        |
|---------|--------|--------|
| REXO2   | 1.092  | 13.96  |
| REXO4   | 2.36   | 20.81  |
| RFC1    | 4.883  | 7.5    |
| RFC2    | 3.388  | 9.08   |
| RFC3    | 2.941  | 2.55   |
| RFC4    | 1.571  | 11.74  |
| RFC5    | 2.791  | 6.79   |
| RFESD   | 2.696  | 0.75   |
| RFFL    | 4.292  | 1.38   |
| RFK     | 2.683  | 1.48   |
| RFNG    | 1.828  | 13.78  |
| RFPL1   | 1.496  | 0      |
| RFPL1S  | 5.113  | 0      |
| RFPL2   | 1.492  | 0.06   |
| RFPL3   | 1.488  | 0      |
| RFPL3S  | 2.314  | 0.08   |
| RFPL4A  | 1.035  | 0      |
| RFPL4B  | 1.9    | 0      |
| RFT1    | 2.782  | 7.24   |
| RFTN1   | 3.569  | 114.12 |
| RFTN2   | 3.112  | 0.03   |
| RFWD2   | 2.839  | 8.24   |
| RFWD3   | 4.952  | 7.42   |
| RFX1    | 4.33   | 6.59   |
| RFX2    | 4.002  | 0.42   |
| RFX3    | 4.108  | 0.35   |
| RFX4    | 4.569  | 0      |
| RFX5    | 4.278  | 52.95  |
| RFXANK  | 1.519  | 25.56  |
| RFXAP   | 2.825  | 2.51   |
| RFXDC1  | 3.496  | 0      |
| RFXDC2  | 6.996  | 4.08   |
| RG9MTD1 | 1.611  | 5.7    |
| RG9MTD2 | 3.697  | 0.96   |
| RG9MTD3 | 1.828  | 0.92   |
| RGAG1   | 5.425  | 0      |
| RGAG4   | 4.336  | 0.06   |
| RGC32   | 0.872  | 19.8   |
| RGL1    | 5.113  | 14.18  |
| RGL2    | 8.73   | 0      |
| RGL3    | 2.26   | 0      |
| RGMA    | 3.216  | 0.15   |
| RGMB    | 6.501  | 0.03   |
| RGN     | 2.235  | 0      |
| RGNEF   | 7.135  | 0      |
| RGPD2   | 8.678  | 0      |
| RGPD3   | 9.747  | 0.03   |
| RGPD5   | 7.867  | 0      |
| RGPD6   | 13.003 | 0      |
| RGPD8   | 9.808  | 0.01   |

|             |       |        |
|-------------|-------|--------|
| Rgr         | 2.885 | 3.12   |
| RGS1        | 1.403 | 1.02   |
| RGS10       | 0.974 | 41.69  |
| RGS11       | 2.442 | 0.07   |
| RGS12       | 7.568 | 5.32   |
| RGS13       | 1.498 | 0      |
| RGS14       | 2.406 | 12.36  |
| RGS16       | 2.427 | 2.78   |
| RGS17       | 1.472 | 0.11   |
| RGS18       | 2.145 | 0.08   |
| RGS19       | 1.692 | 57.85  |
| RGS2        | 1.344 | 1      |
| RGS20       | 2.184 | 0.85   |
| RGS21       | 1.794 | 0      |
| RGS22       | 4.184 | 0      |
| RGS3        | 6.517 | 0.55   |
| RGS4        | 2.772 | 0      |
| RGS5        | 5.833 | 0.16   |
| RGS6        | 3.105 | 0.05   |
| RGS7        | 2.386 | 0      |
| RGS7BP      | 3.821 | 0      |
| RGS8        | 0.783 | 0      |
| RGS9        | 2.235 | 0.19   |
| RGS9BP      | 3.121 | 0      |
| RGSL1       | 2.06  | 0.04   |
| RGSL2       | 2.009 | 0      |
| RH_II/GuBp2 | 5.515 | 0      |
| RHAG        | 1.895 | 2.35   |
| RHBDD1      | 2.74  | 5.75   |
| RHBDD2      | 3.646 | 8.73   |
| RHBDD3      | 1.738 | 7.66   |
| RHBDF1      | 2.954 | 0.23   |
| RHBDF2      | 3.726 | 7.35   |
| RHBDL1      | 1.559 | 0.43   |
| RHBDL2      | 1.837 | 0.04   |
| RHBDL3      | 4.661 | 0.05   |
| RHBG        | 1.79  | 0      |
| RHCE        | 1.997 | 0.51   |
| RHCG        | 1.937 | 0      |
| RHD         | 2.833 | 0.41   |
| RHEB        | 2.754 | 3.82   |
| RHEBL1      | 1.177 | 1.65   |
| RHEBP1      | 1.351 | 2.43   |
| RH-II/GuBp1 | 2.71  | 1.18   |
| RHO         | 2.768 | 0      |
| RHOA        | 1.922 | 477.59 |
| RHOB        | 2.367 | 40.96  |
| RHOBTB1     | 4.671 | 0.05   |
| RHOBTB2     | 5.077 | 5.89   |
| RHOBTB3     | 4.124 | 2.17   |

|        |       |        |
|--------|-------|--------|
| RHOC   | 1.088 | 123.57 |
| RHOD   | 1.097 | 0      |
| RHOF   | 2.435 | 13.84  |
| RHOG   | 1.286 | 68.77  |
| RHOH   | 1.498 | 17.32  |
| RHOJ   | 1.905 | 0.08   |
| RHOQ   | 2.127 | 1.27   |
| RHOQP  | 0.641 | 0.26   |
| RHOT1  | 5.537 | 6.07   |
| RHOT2  | 2.489 | 24.57  |
| RHOU   | 4.322 | 3.08   |
| RHOV   | 1.167 | 1.16   |
| RHPN1  | 2.241 | 9.32   |
| RHPN2  | 3.501 | 0.19   |
| RIBC1  | 3.077 | 0.22   |
| RIBC2  | 1.396 | 2.47   |
| RIC3   | 2.893 | 0.03   |
| RIC8A  | 2.702 | 34.51  |
| RIC8B  | 3.389 | 1.67   |
| RICS   | 6.48  | 0      |
| RICTOR | 9.535 | 0.71   |
| RIF1   | 8.383 | 1.75   |
| RILP   | 1.792 | 7.43   |
| RIMBP2 | 6.321 | 0      |
| RIMKLP | 1.84  | 1.65   |
| RIMS1  | 5.079 | 0      |
| RIMS2  | 4.449 | 0      |
| RIMS3  | 7.233 | 7.98   |
| RIMS4  | 5.136 | 0      |
| RIN1   | 2.684 | 4.89   |
| RIN2   | 4.244 | 1.89   |
| RIN3   | 3.849 | 4.14   |
| RING1  | 5.214 | 0.13   |
| RINT1  | 5.952 | 1.46   |
| RIOK1  | 2.728 | 7.72   |
| RIOK2  | 1.832 | 6.02   |
| RIOK3  | 5.659 | 5.97   |
| RIPK1  | 3.864 | 6.21   |
| RIPK2  | 2.585 | 4.17   |
| RIPK3  | 1.921 | 3.33   |
| RIPK4  | 3.872 | 0.13   |
| RIPK5  | 7.87  | 0.41   |
| RIT1   | 3.425 | 5.86   |
| RIT2   | 1.093 | 0      |
| RKHD1  | 2.132 | 2.92   |
| RKHD2  | 3.473 | 6.24   |
| RKHD3  | 3.398 | 0.4    |
| RLBP1  | 1.752 | 0      |
| RLF    | 6.228 | 1.83   |
| RLN1   | 0.967 | 0      |

|           |       |        |
|-----------|-------|--------|
| RLN2      | 1.466 | 0      |
| RLN3      | 0.452 | 0      |
| RLTPR     | 4.479 | 10.3   |
| RMI1      | 3.416 | 2      |
| RMND1     | 1.854 | 3.41   |
| RMND5A    | 4.582 | 11.54  |
| RMND5B    | 1.808 | 3.08   |
| RN7SK     | 0.332 | 64.96  |
| RN7SL1    | 0.299 | 47.61  |
| RN7SLP2   | 0.235 | 1.43   |
| RN7SLP5   | 0.217 | 0      |
| RNASE1    | 1.124 | 35.6   |
| RNASE10   | 0.651 | 0.39   |
| RNASE11   | 1.767 | 0      |
| RNASE12   | 0.444 | 0      |
| RNASE13   | 1.607 | 0      |
| RNASE2    | 0.735 | 8.25   |
| RNASE3    | 0.716 | 8.24   |
| RNASE4    | 1.997 | 1.05   |
| RNASE6    | 1.059 | 32.45  |
| RNASE7    | 1.466 | 0      |
| RNASE8    | 0.465 | 0      |
| RNASE9    | 0.618 | 0      |
| RNASEH1   | 1.648 | 7.06   |
| RNASEH1P1 | 0.801 | 0.11   |
| RNASEH1P2 | 0.829 | 1.72   |
| RNASEH1P3 | 0.856 | 0.2    |
| RNASEH2A  | 1.142 | 24.12  |
| RNASEH2B  | 1.515 | 20.35  |
| RNASEH2C  | 0.887 | 49.01  |
| RNASEL    | 4.148 | 3.94   |
| RNASEN    | 4.74  | 12.92  |
| RNASET2   | 1.25  | 343.69 |
| RND1      | 1.652 | 0.1    |
| RND2      | 4.152 | 0.12   |
| RND3      | 2.683 | 0.03   |
| RNF10     | 3.784 | 33.66  |
| RNF103    | 3.477 | 1.28   |
| RNF11     | 3.139 | 5.88   |
| RNF111    | 5.538 | 2.92   |
| RNF113A   | 1.353 | 19.05  |
| RNF113B   | 1.378 | 0      |
| RNF11B    | 0.439 | 0      |
| RNF12     | 5.122 | 3.52   |
| RNF121    | 2.379 | 5.03   |
| RNF122    | 1.868 | 29.4   |
| RNF123    | 4.255 | 12.69  |
| RNF125    | 1.916 | 4.04   |
| RNF126    | 2.195 | 14.93  |
| RNF126P1  | 1.318 | 2.81   |



|          |        |       |
|----------|--------|-------|
| RNF128   | 3.411  | 0     |
| RNF13    | 4.631  | 2.75  |
| RNF130   | 1.847  | 75.53 |
| RNF133   | 2.886  | 0     |
| RNF135   | 3.401  | 14.02 |
| RNF138   | 3.644  | 5.04  |
| RNF138P1 | 5.701  | 0.53  |
| RNF139   | 3.312  | 12.31 |
| RNF14    | 3.903  | 6.19  |
| RNF141   | 4.084  | 5.61  |
| RNF144   | 5.74   | 0.18  |
| RNF146   | 2.147  | 3.88  |
| RNF148   | 2.604  | 0     |
| RNF149   | 2.452  | 3.57  |
| RNF150   | 4.661  | 0     |
| RNF151   | 0.802  | 0     |
| RNF152   | 1.805  | 0.04  |
| RNF157   | 4.134  | 3.59  |
| RNF165   | 5.276  | 0     |
| RNF166   | 1.848  | 11.8  |
| RNF167   | 1.708  | 74.57 |
| RNF168   | 2.316  | 3.38  |
| RNF169   | 8.9    | 1.51  |
| RNF17    | 5.108  | 0.02  |
| RNF170   | 2.065  | 3.31  |
| RNF175   | 1.569  | 0.21  |
| RNF180   | 1.727  | 0     |
| RNF182   | 3.304  | 0.03  |
| RNF183   | 1.21   | 0     |
| RNF185   | 3.166  | 9.93  |
| RNF186   | 1.25   | 0     |
| RNF187   | 3.81   | 28.96 |
| RNF19    | 4.563  | 3.88  |
| RNF190   | 3.09   | 0     |
| RNF2     | 3.551  | 5.33  |
| RNF20    | 3.94   | 13.77 |
| RNF207   | 1.859  | 0     |
| RNF208   | 0.752  | 0     |
| RNF212   | 2.332  | 0     |
| RNF213   | 12.854 | 13.16 |
| RNF214   | 2.338  | 8.32  |
| RNF24    | 1.696  | 2.43  |
| RNF25    | 1.561  | 12.25 |
| RNF26    | 2.786  | 26.51 |
| RNF31    | 4.075  | 13.91 |
| RNF32    | 3.492  | 0.12  |
| RNF34    | 2.195  | 11.74 |
| RNF38    | 5.756  | 3.38  |
| RNF39    | 11.471 | 0     |
| RNF4     | 2.947  | 17.95 |

|         |       |       |
|---------|-------|-------|
| RNF40   | 4.233 | 25.11 |
| RNF41   | 3.846 | 12.68 |
| RNF43   | 5.575 | 0.04  |
| RNF44   | 4.153 | 63.97 |
| RNF5    | 3.381 | 0.52  |
| RNF5P1  | 1.088 | 5.88  |
| RNF6    | 4.368 | 7.5   |
| RNF7    | 3.01  | 10.13 |
| RNF8    | 9.585 | 1.52  |
| RNGTT   | 4.415 | 3.53  |
| RNH1    | 2.218 | 24.27 |
| RNMT    | 6.203 | 3.82  |
| RNMTL1  | 1.801 | 7.58  |
| RNPC3   | 0.411 | 0.82  |
| RNPEP   | 2.413 | 20.39 |
| RNPEPL1 | 2.913 | 57.08 |
| RNPS1   | 2.072 | 71.1  |
| RNR1    | 0.1   | 0     |
| RNR2    | 0.1   | 0     |
| RNU12   | 0.544 | 0     |
| RNU12P  | 0.73  | 0     |
| RNU1P10 | 0.164 | 1.03  |
| RNU1P6  | 0.162 | 0     |
| RNU1P7  | 0.154 | 0     |
| RNU1P8  | 0.264 | 0     |
| RNU1P9  | 0.164 | 0     |
| RNU2    | 0.187 | 0     |
| RNU2B   | 0.138 | 0.61  |
| RNU2P2  | 0.189 | 0     |
| RNU3    | 0.1   | 0     |
| RNU3P3  | 0.145 | 0     |
| RNU3P4  | 0.144 | 0     |
| RNU4B1  | 0.144 | 37.44 |
| RNU4P1  | 0.5   | 0     |
| RNU4P2  | 0.679 | 0     |
| RNU4P3  | 0.1   | 0     |
| RNU4P5  | 0.1   | 0     |
| RNU4P6  | 0.1   | 0     |
| RNU56B  | 0.1   | 0     |
| RNU5B   | 0.117 | 2.16  |
| RNU5C   | 0.117 | 0     |
| RNU5D   | 0.1   | 0.84  |
| RNU5E   | 0.119 | 0     |
| RNU5F   | 0.116 | 0.72  |
| RNU6B   | 0.1   | 0     |
| RNU7P4  | 0.1   | 0     |
| RNU86   | 0.1   | 0.84  |
| RNUXA   | 1.751 | 7.03  |
| RNY4P2  | 0.1   | 0     |
| RNY4P3  | 0.1   | 0     |

|               |        |        |
|---------------|--------|--------|
| RNY5          | 1.616  | 0.15   |
| ROBO1         | 7.647  | 0      |
| ROBO2         | 5.598  | 0      |
| ROBO3         | 4.569  | 5.31   |
| ROBO4         | 3.746  | 21.25  |
| ROCK1         | 4.065  | 6.57   |
| ROCK2         | 6.401  | 3.1    |
| ROD1          | 7.23   | 11.14  |
| ROGDI         | 1.458  | 17.74  |
| ROM1          | 1.464  | 1.44   |
| ROPN1         | 1.104  | 0      |
| ROPN1B        | 1.001  | 0      |
| ROPN1L        | 1.037  | 0      |
| ROR1          | 3.358  | 0.27   |
| ROR2          | 4.091  | 0.25   |
| RORA          | 2.558  | 0.07   |
| RORB          | 3.604  | 0      |
| RORC          | 3.214  | 2.15   |
| ROS1          | 7.368  | 0      |
| RP1           | 7.1    | 0.15   |
| RP11-114G1.1  | 2.768  | 0.58   |
| RP11-114H20.1 | 2.369  | 0      |
| RP11-11C5.2   | 2.475  | 1.6    |
| RP11-125A7.3  | 7.566  | 2.51   |
| RP11-130N24.1 | 10.693 | 0      |
| RP11-133N1.2  | 1.461  | 0      |
| RP11-138L21.1 | 0.861  | 0      |
| RP11-139H14.4 | 1.687  | 0.05   |
| RP11-145H9.1  | 5.752  | 0.15   |
| RP11-151A2.2  | 0.819  | 0.51   |
| RP11-162I21.1 | 3.037  | 8.46   |
| RP11-165H20.1 | 2.829  | 0      |
| RP11-167P23.2 | 0.457  | 0      |
| RP11-169K16.3 | 1.52   | 0      |
| RP11-184C23.1 | 2.863  | 0      |
| RP11-191L9.1  | 4.185  | 0      |
| RP11-193G17.1 | 1.197  | 187.83 |
| RP11-217H1.1  | 3.884  | 9.91   |
| RP11-218C14.6 | 24.014 | 0      |
| RP11-262D11.5 | 3.978  | 0      |
| RP11-262H14.4 | 1.48   | 0      |
| RP11-269F19.9 | 1.265  | 0.07   |
| RP1-127L4.6   | 0.805  | 0      |
| RP11-282A11.1 | 0.739  | 0.11   |
| RP11-291L22.2 | 19.525 | 0.03   |
| RP11-298P3.3  | 3.509  | 3.84   |
| RP11-301I17.1 | 2.624  | 0.16   |
| RP11-301J16.2 | 0.315  | 0      |
| RP11-320C15.1 | 0.835  | 20.07  |
| RP11-321G1.2  | 1.186  | 0      |

|                 |        |       |
|-----------------|--------|-------|
| RP11-327P2.4    | 0.718  | 0.12  |
| RP11-350O14.10  | 1.209  | 0.98  |
| RP11-35F15.2    | 1.281  | 0     |
| RP11-35N6.1     | 2.676  | 0     |
| RP11-365K22.1   | 1.324  | 7.19  |
| RP11-366N18.1   | 4.017  | 0     |
| RP11-38L15.1    | 3.497  | 0.02  |
| RP11-408E5.4    | 0.24   | 0     |
| RP11-410N8.4    | 0.846  | 0     |
| RP11-413M3.2    | 0.537  | 15.22 |
| RP11-430N14.1   | 0.531  | 0     |
| RP11-431O22.2   | 0.522  | 0.48  |
| RP11-444E17.2   | 1.647  | 0.05  |
| RP11-45J16.2    | 10.584 | 0     |
| RP11-460E7.5    | 3.577  | 0     |
| RP11-493K23.2   | 2.898  | 0     |
| RP11-493K23.3   | 2.237  | 0     |
| RP11-49G10.8    | 1.203  | 0     |
| RP1-14N1.3      | 9.118  | 0     |
| RP11-506K6.3    | 1.151  | 12.88 |
| RP11-50D16.3    | 3.549  | 1.61  |
| RP11-529I10.4   | 0.799  | 6.01  |
| RP1-153G14.3    | 1.224  | 0.27  |
| RP11-564C4.1    | 5.723  | 0.21  |
| RP11-56A21.1    | 4.672  | 1.86  |
| RP11-584P2.3    | 6.391  | 0     |
| RP11-61E5.1     | 0.86   | 9.7   |
| RP11-69O16.1    | 1.162  | 0     |
| RP11-763B22.5   | 0.486  | 0     |
| RP11-78J21.1    | 2.365  | 3.57  |
| RP11-87M18.1    | 0.903  | 0     |
| RP11-92J19.4    | 1.419  | 4.34  |
| RP11-93B10.1    | 4.105  | 1.29  |
| RP11-93B14.6    | 2.526  | 0     |
| RP11-95H8.1     | 4.226  | 0     |
| RP11-98I6.3     | 2.022  | 0.25  |
| RP1-27O5.1      | 1.623  | 0     |
| RP1-303F19.1    | 1.641  | 0     |
| RP13-102H20.1   | 3.083  | 0     |
| RP13-15M17.2    | 4.707  | 4.16  |
| RP1-32F7.2      | 3.156  | 0     |
| RP13-347D8.3    | 7.403  | 0     |
| RP13-36C9.1     | 1.492  | 0     |
| RP13-36C9.3     | 1.008  | 0     |
| RP13-36C9.6     | 1.008  | 0     |
| RP13-377G1__A.2 | 0.213  | 0     |
| RP1-57A13.2     | 1.72   | 0.49  |
| RP1-93H18.5     | 1.109  | 58.03 |
| RP1L1           | 7.978  | 0.28  |
| RP2             | 3.802  | 2.51  |

|               |       |       |
|---------------|-------|-------|
| RP3-340N1.3   | 0.768 | 0.22  |
| RP3-355C18.2  | 2.505 | 0     |
| RP3-377H14.5  | 8.511 | 0     |
| RP3-398D13.1  | 2.819 | 0.15  |
| RP3-402G11.5  | 2.315 | 13.39 |
| RP3-402H5.2   | 1.533 | 0     |
| RP3-405J24.3  | 0.548 | 85.92 |
| RP3-452H17.2  | 0.519 | 0     |
| RP3-474I12.5  | 0.72  | 0     |
| RP3-509I19.5  | 2.478 | 0     |
| RP3-510O8.5   | 0.488 | 0     |
| RP4-691N24.1  | 4.973 | 6.64  |
| RP4-692D3.1   | 2.988 | 0.11  |
| RP4-747L4.3   | 2.801 | 3.45  |
| RP4-753D5.2   | 0.502 | 1.34  |
| RP5-1022P6.2  | 4.06  | 8.13  |
| RP5-1054A22.3 | 6.412 | 0.02  |
| RP5-1077B9.4  | 2.588 | 38.54 |
| RP5-1103G7.6  | 2.119 | 0     |
| RP5-821D11.2  | 4.006 | 0.21  |
| RP5-854E16.2  | 1.23  | 17.39 |
| RP5-860F19.3  | 3.139 | 0.59  |
| RP5-875H10.1  | 6.089 | 0     |
| RP5-964H19.3  | 2.729 | 0     |
| RP6-166C19.1  | 1.288 | 0     |
| RP6-166C19.10 | 1.288 | 0     |
| RP6-166C19.11 | 1.288 | 0     |
| RP6-166C19.2  | 1.288 | 0     |
| RP6-166C19.3  | 1.288 | 0     |
| RP6-166C19.4  | 1.288 | 0     |
| RP6-166C19.5  | 1.288 | 0     |
| RP6-166C19.6  | 1.288 | 0     |
| RP6-166C19.9  | 1.288 | 0     |
| RP6-213H19.1  | 3.254 | 7.5   |
| RP9           | 2.242 | 6.31  |
| RPA1          | 2.795 | 35.89 |
| RPA2          | 1.72  | 35.02 |
| RPA2P         | 1.427 | 0     |
| RPA3          | 3.188 | 1.93  |
| RPA4          | 1.56  | 0     |
| RPAIN         | 2.025 | 7.07  |
| RPAP1         | 4.672 | 9.63  |
| RPE           | 4.253 | 1.75  |
| RPE65         | 2.608 | 0     |
| RPESP         | 1.322 | 0     |
| RPGR          | 6.571 | 0.81  |
| RPGRIP1       | 3.861 | 0     |
| RPH3A         | 2.951 | 0.06  |
| RPH3AL        | 3.212 | 16.58 |
| RPIA          | 1.834 | 20.63 |

|          |       |         |
|----------|-------|---------|
| RPIB9    | 4.486 | 0.19    |
| RPIP8    | 1.821 | 0.23    |
| RPL10    | 2.866 | 159.51  |
| RPL10A   | 0.719 | 1166.3  |
| RPL10AP1 | 0.679 | 0.99    |
| RPL10AP2 | 0.716 | 110.36  |
| RPL10L   | 0.813 | 1.35    |
| RPL10P1  | 0.742 | 2.5     |
| RPL11    | 0.609 | 2565.66 |
| RPL12    | 0.631 | 796.3   |
| RPL12L2  | 0.612 | 1.1     |
| RPL12L3  | 0.625 | 0.67    |
| RPL12P10 | 2.91  | 0.03    |
| RPL12P3  | 0.396 | 0       |
| RPL12P4  | 0.497 | 115.08  |
| RPL12P5  | 0.392 | 0.21    |
| RPL12P6  | 0.564 | 0.3     |
| RPL12P7  | 0.545 | 0       |
| RPL13    | 1.322 | 1835.29 |
| RPL13A   | 1.127 | 1440.6  |
| RPL13AP2 | 0.573 | 9.26    |
| RPL13P2  | 0.659 | 83.22   |
| RPL14    | 0.971 | 895.98  |
| RPL14L   | 1.704 | 195.86  |
| RPL15    | 1.993 | 559.73  |
| RPL15P1  | 0.6   | 1.12    |
| RPL15P2  | 2.06  | 0.53    |
| RPL17    | 0.944 | 120.82  |
| RPL17P1  | 0.536 | 0       |
| RPL17P3  | 0.684 | 0       |
| RPL17P4  | 0.586 | 0.14    |
| RPL18    | 0.641 | 2101.69 |
| RPL18A   | 0.618 | 1058.13 |
| RPL18AP1 | 0.61  | 11.18   |
| RPL18P1  | 0.571 | 0       |
| RPL19    | 1.976 | 291.97  |
| RPL19P1  | 0.428 | 0       |
| RPL21    | 1.392 | 2       |
| RPL21P1  | 0.954 | 0       |
| RPL21P10 | 0.885 | 1.05    |
| RPL21P11 | 0.56  | 0.3     |
| RPL21P12 | 0.9   | 0.09    |
| RPL21P13 | 0.49  | 0.17    |
| RPL21P2  | 0.491 | 0.17    |
| RPL21P4  | 0.492 | 0       |
| RPL21P8  | 0.594 | 1.13    |
| RPL21P9  | 0.713 | 0.12    |
| RPL22    | 2.085 | 207.62  |
| RPL22L1  | 2.054 | 15.5    |
| RPL22P2  | 0.46  | 6.96    |

|           |        |         |
|-----------|--------|---------|
| RPL23     | 0.577  | 1647.78 |
| RPL23A    | 0.97   | 181.93  |
| RPL23AP1  | 1.413  | 0       |
| RPL23AP10 | 0.513  | 0.16    |
| RPL23AP11 | 0.489  | 1.03    |
| RPL23AP13 | 2.304  | 0.19    |
| RPL23AP3  | 0.533  | 0.47    |
| RPL23AP4  | 0.473  | 0       |
| RPL23AP6  | 0.472  | 0.71    |
| RPL23AP7  | 16.573 | 0.23    |
| RPL23AP9  | 0.494  | 0.68    |
| RPL23P2   | 0.477  | 7.95    |
| RPL24     | 0.562  | 468.1   |
| RPL24P1   | 0.481  | 0.35    |
| RPL24P3   | 0.491  | 0       |
| RPL24P4   | 0.433  | 460.67  |
| RPL26     | 0.582  | 895.77  |
| RPL26L1   | 0.71   | 15.78   |
| RPL26P2   | 0.491  | 0.34    |
| RPL26P3   | 0.488  | 0       |
| RPL26P4   | 0.726  | 4.29    |
| RPL27     | 0.495  | 1532.75 |
| RPL27A    | 0.545  | 2072.67 |
| RPL27AP   | 0.833  | 3.84    |
| RPL27P1   | 0.465  | 244.38  |
| RPL28     | 4.209  | 366.55  |
| RPL29     | 0.695  | 933.26  |
| RPL29P1   | 0.463  | 0       |
| RPL29P2   | 0.657  | 1.92    |
| RPL3      | 1.514  | 1544.18 |
| RPL30     | 0.505  | 2432.66 |
| RPL31     | 0.442  | 1153.96 |
| RPL31P1   | 0.405  | 0.41    |
| RPL31P10  | 0.408  | 3.71    |
| RPL31P2   | 0.379  | 2       |
| RPL31P3   | 0.852  | 0.1     |
| RPL31P8   | 0.374  | 0       |
| RPL32     | 1.968  | 330.52  |
| RPL32L2   | 0.373  | 0.23    |
| RPL32P1   | 1.539  | 0       |
| RPL34     | 1.023  | 237.15  |
| RPL34P1   | 0.354  | 0.95    |
| RPL34P2   | 0.353  | 1.43    |
| RPL34P3   | 0.38   | 0       |
| RPL35     | 0.46   | 1480.17 |
| RPL35A    | 0.484  | 1770.16 |
| RPL35AP   | 0.797  | 0       |
| RPL35AP2  | 0.258  | 9.14    |
| RPL36     | 0.606  | 1546.97 |
| RPL36A    | 0.452  | 8.75    |

|          |       |         |
|----------|-------|---------|
| RPL36AL  | 0.523 | 195.37  |
| RPL36AP2 | 0.767 | 0       |
| RPL36AP3 | 0.37  | 55.32   |
| RPL36AP4 | 0.264 | 0       |
| RPL36P1  | 0.228 | 0       |
| RPL36P2  | 0.319 | 0       |
| RPL37    | 1.57  | 800.02  |
| RPL37A   | 0.42  | 2677.89 |
| RPL37AP1 | 0.279 | 1162.09 |
| RPL37P1  | 0.284 | 11.86   |
| RPL37P2  | 0.366 | 262.15  |
| RPL38    | 0.447 | 1516.81 |
| RPL38P1  | 0.24  | 0.71    |
| RPL39    | 0.401 | 196.62  |
| RPL39L   | 0.703 | 2.4     |
| RPL39P   | 0.156 | 0       |
| RPL39P2  | 0.365 | 0.46    |
| RPL39P3  | 0.385 | 868.62  |
| RPL3L    | 1.529 | 0.05    |
| RPL3P1   | 1.265 | 2.93    |
| RPL3P2   | 2.479 | 0       |
| RPL3P4   | 0.478 | 1042.55 |
| RPL4     | 1.432 | 905.07  |
| RPL41    | 0.667 | 29.68   |
| RPL41P1  | 0.413 | 747.32  |
| RPL41P2  | 0.407 | 1.45    |
| RPL41P3  | 1.177 | 1.93    |
| RPL41P4  | 0.429 | 5.11    |
| RPL5     | 1.031 | 795.71  |
| RPL5P2   | 0.854 | 0       |
| RPL6     | 1.183 | 184.92  |
| RPL7     | 0.837 | 8.46    |
| RPL7A    | 0.89  | 684.96  |
| RPL7AL2  | 0.308 | 0       |
| RPL7AL3  | 0.285 | 0       |
| RPL7AL4  | 0.776 | 0.65    |
| RPL7AP1  | 0.802 | 2.52    |
| RPL7AP5  | 0.881 | 0.77    |
| RPL7AP6  | 0.881 | 110.73  |
| RPL7AP7  | 0.89  | 0.28    |
| RPL7AP8  | 0.865 | 0.49    |
| RPL7L1   | 1.275 | 5.75    |
| RPL7P    | 0.834 | 33.64   |
| RPL7P2   | 0.268 | 0       |
| RPL7P3   | 0.715 | 0       |
| RPL7P6   | 1.386 | 0.37    |
| RPL8     | 0.975 | 2234.36 |
| RPL9     | 0.898 | 17.45   |
| RPL9P6   | 0.714 | 0       |
| RPL9P7   | 0.703 | 0       |



|            |        |         |
|------------|--------|---------|
| RPL9P8     | 0.704  | 10.77   |
| RPLP0      | 1.312  | 1689.02 |
| RPLP0-like | 1.179  | 658.46  |
| RPLP0P1    | 0.456  | 0       |
| RPLP0P2    | 27.939 | 0.87    |
| RPLP1      | 0.512  | 6311.93 |
| RPLP1P1    | 0.968  | 9.23    |
| RPLP2      | 0.493  | 2790.04 |
| RPN1       | 2.341  | 93.05   |
| RPN2       | 2.49   | 101.25  |
| RPP14      | 1.55   | 2.88    |
| RPP21      | 1.566  | 0       |
| RPP25      | 2.333  | 1.37    |
| RPP30      | 2.612  | 2.68    |
| RPP38      | 1.545  | 4.91    |
| RPP40      | 1.159  | 7.41    |
| RPPH1      | 0.341  | 27.67   |
| RPRM       | 1.471  | 0       |
| RPRML      | 1.093  | 0       |
| RPS10      | 0.618  | 397.6   |
| RPS10L     | 0.611  | 0.55    |
| RPS10P2    | 0.494  | 1.88    |
| RPS10P3    | 0.577  | 1.32    |
| RPS11      | 0.609  | 3565.84 |
| RPS11P1    | 0.473  | 0       |
| RPS12      | 0.503  | 2238.7  |
| RPS12P1    | 0.307  | 0       |
| RPS13      | 0.529  | 1315.77 |
| RPS14      | 1.105  | 801.57  |
| RPS15      | 0.531  | 1076.67 |
| RPS15A     | 0.568  | 1048.36 |
| RPS15AP1   | 0.296  | 81.67   |
| RPS15AP2   | 0.362  | 0       |
| RPS15AP3   | 0.414  | 0       |
| RPS16      | 0.59   | 2513.23 |
| RPS17      | 0.485  | 1416.21 |
| RPS17P2    | 0.493  | 3.59    |
| RPS18      | 1.626  | 0       |
| RPS18P1    | 0.458  | 0.19    |
| RPS18P2    | 0.538  | 785.37  |
| RPS19      | 0.849  | 1563.18 |
| RPS19BP1   | 0.927  | 40.71   |
| RPS19P1    | 0.468  | 895.64  |
| RPS19P2    | 0.441  | 414.69  |
| RPS2       | 1.113  | 862.04  |
| RPS20      | 0.523  | 1344.55 |
| RPS20P1    | 0.459  | 0.37    |
| RPS20P3    | 0.5    | 1.18    |
| RPS20P4    | 0.46   | 1.46    |
| RPS21      | 0.396  | 932.98  |

|          |       |         |
|----------|-------|---------|
| RPS23    | 3.314 | 446.8   |
| RPS23P1  | 0.505 | 61.55   |
| RPS24    | 0.702 | 1470.89 |
| RPS24P1  | 7.38  | 0.01    |
| RPS24P2  | 0.522 | 66.8    |
| RPS24P3  | 0.557 | 3.48    |
| RPS25    | 0.492 | 3038.82 |
| RPS26    | 0.682 | 3.59    |
| RPS26e   | 0.892 | 0.19    |
| RPS26L   | 4.714 | 0.02    |
| RPS26L1  | 0.566 | 0       |
| RPS26P10 | 0.908 | 0.09    |
| RPS26P3  | 0.451 | 0.56    |
| RPS26P4  | 0.44  | 0       |
| RPS26P6  | 0.348 | 0       |
| RPS27    | 0.617 | 37.95   |
| RPS27A   | 0.541 | 742.09  |
| RPS27AP1 | 0.547 | 0       |
| RPS27AP2 | 0.465 | 0.37    |
| RPS27AP4 | 0.507 | 0       |
| RPS27L   | 1.084 | 22.46   |
| RPS27P3  | 0.255 | 845     |
| RPS28    | 0.382 | 5.95    |
| RPS29    | 0.829 | 699.49  |
| RPS29P1  | 0.204 | 0       |
| RPS2L1   | 0.966 | 6.8     |
| RPS2P2   | 0.928 | 1.36    |
| RPS2P3   | 0.87  | 0.97    |
| RPS2P4   | 0.942 | 7.69    |
| RPS2P6   | 0.98  | 1.12    |
| RPS3     | 0.841 | 3172.52 |
| RPS3A    | 1.772 | 3.76    |
| RPS3AP1  | 0.365 | 0       |
| RPS3AP3  | 0.242 | 0       |
| RPS3AP6  | 0.859 | 0.49    |
| RPS3P1   | 0.192 | 0.44    |
| RPS3P2   | 0.71  | 0       |
| RPS4L    | 0.394 | 8.34    |
| RPS4L2   | 0.612 | 50.65   |
| RPS4X    | 0.956 | 1876.1  |
| RPS4Y1   | 0.897 | 359.29  |
| RPS4Y2   | 0.79  | 56.62   |
| RPS5     | 0.741 | 1761.91 |
| RPS5L    | 0.688 | 0.85    |
| RPS5P1   | 0.623 | 397.25  |
| RPS6     | 0.829 | 3808.09 |
| RPS6KA1  | 3.383 | 38.37   |
| RPS6KA2  | 6.287 | 25.62   |
| RPS6KA3  | 7.71  | 3.66    |
| RPS6KA4  | 3.253 | 14.32   |

|         |       |         |
|---------|-------|---------|
| RPS6KA5 | 4.493 | 0.36    |
| RPS6KA6 | 2.616 | 0       |
| RPS6KB1 | 5.319 | 2.37    |
| RPS6KB2 | 2.322 | 18.24   |
| RPS6KC1 | 4.182 | 2.36    |
| RPS6KL1 | 3.017 | 1.09    |
| RPS6P1  | 0.786 | 1.93    |
| RPS7    | 0.728 | 99.05   |
| RPS7P1  | 0.585 | 206.34  |
| RPS8    | 0.705 | 1959.17 |
| RPS9    | 0.713 | 2082.27 |
| RPS9P1  | 0.684 | 6.65    |
| RPS9P2  | 0.723 | 302.69  |
| RPSA    | 1.153 | 213.62  |
| RPSAP1  | 0.88  | 0.38    |
| RPSAP10 | 0.881 | 0.48    |
| RPSAP14 | 0.379 | 2.45    |
| RPSAP15 | 1.041 | 1.05    |
| RPSAP3  | 1.032 | 1.22    |
| RPSAP4  | 1.03  | 1.14    |
| RPSAP5  | 1.026 | 0.99    |
| RPTN    | 2.529 | 0       |
| RPUSD1  | 2.05  | 17.91   |
| RPUSD2  | 1.839 | 6.5     |
| RPUSD3  | 1.201 | 27.29   |
| RPUSD4  | 2.146 | 14.72   |
| ROCD1   | 2.22  | 26.45   |
| RRAD    | 1.441 | 0.12    |
| RRAGA   | 1.652 | 18.92   |
| RRAGB   | 2.138 | 4.96    |
| RRAGC   | 1.939 | 9.03    |
| RRAGD   | 1.45  | 2.62    |
| RRAS    | 0.983 | 14.14   |
| RRAS2   | 1.499 | 10.45   |
| RRBP1   | 3.666 | 64.04   |
| RREB1   | 8.367 | 6.83    |
| RRH     | 1.558 | 0.05    |
| RRM1    | 3.104 | 17.4    |
| RRM2    | 2.473 | 21.94   |
| RRM2B   | 4.93  | 1.9     |
| RRM2P3  | 1.163 | 3.55    |
| RRM2P4  | 0.566 | 0       |
| RRN3    | 3.746 | 6.02    |
| RRP12   | 4.364 | 8.86    |
| RRP15   | 1.34  | 2.7     |
| RRP9    | 1.543 | 18.35   |
| RRS1    | 1.706 | 14.46   |
| RS1     | 3.032 | 0       |
| RSAD1   | 2.499 | 15.44   |
| RSAD2   | 3.512 | 0.24    |

|         |        |       |
|---------|--------|-------|
| RSBN1   | 6.593  | 5.28  |
| RSBN1L  | 6.182  | 3.11  |
| RSC1A1  | 2.422  | 4.84  |
| RSF1    | 5.134  | 2.69  |
| RSHL1   | 2.456  | 0     |
| RSHL2   | 2.177  | 3.76  |
| RSHL3   | 2.825  | 0.95  |
| RSL1D1  | 1.932  | 89.86 |
| RSPO1   | 2.985  | 14.9  |
| RSPO2   | 2.801  | 0     |
| RSPO3   | 2.141  | 0.04  |
| RSPO4   | 2.707  | 0.03  |
| RSPRY1  | 2.072  | 5.45  |
| RSRC1   | 1.634  | 7.01  |
| RSRC2   | 3.049  | 16.8  |
| RSU1    | 3.806  | 10.14 |
| RTBDN   | 1.328  | 0     |
| RTCD1   | 1.537  | 8.77  |
| RTDR1   | 1.252  | 0     |
| RTL1    | 5.256  | 4.18  |
| RTF1    | 5.003  | 13.11 |
| RTKN    | 3.049  | 7.24  |
| RTL1    | 4.077  | 0     |
| RTN1    | 4.461  | 0.06  |
| RTN2    | 3.37   | 2.37  |
| RTN3    | 8.397  | 8.37  |
| RTN4    | 7.604  | 14.79 |
| RTN4IP1 | 1.667  | 2.78  |
| RTN4R   | 1.919  | 2.02  |
| RTN4RL1 | 3.164  | 4.55  |
| RTN4RL2 | 1.263  | 1.4   |
| RTP1    | 2.183  | 0     |
| RTP2    | 1.346  | 0     |
| RTP3    | 0.817  | 0     |
| RTP4    | 1.014  | 4.57  |
| RTTN    | 7.098  | 1.5   |
| RUFY1   | 3.213  | 13.82 |
| RUFY2   | 2.425  | 1.84  |
| RUFY3   | 5.919  | 3.97  |
| RUFY4   | 3.567  | 0     |
| RUNDC1  | 3.828  | 5     |
| RUNDC2A | 2.248  | 0.45  |
| RUNDC2B | 1.22   | 0     |
| RUNDC2C | 39.987 | 0.01  |
| RUNX1   | 8.024  | 27.34 |
| RUNX1T1 | 4.301  | 0     |
| RUNX2   | 6.334  | 4.38  |
| RUNX3   | 5.475  | 11.78 |
| RUSC1   | 2.163  | 7.55  |
| RUSC2   | 5.199  | 1.12  |

|          |        |        |
|----------|--------|--------|
| RUTBC1   | 4.867  | 10.77  |
| RUTBC2   | 6.057  | 0      |
| RUTBC3   | 2.989  | 31.93  |
| RUVBL1   | 1.736  | 32.95  |
| RUVBL2   | 1.488  | 61.53  |
| RWDD1    | 1.691  | 16.14  |
| RWDD2    | 1.279  | 1.65   |
| RWDD3    | 1.078  | 3.91   |
| RWDD4A   | 2.566  | 2.07   |
| RXFP1    | 2.412  | 0      |
| RXFP2    | 2.803  | 0      |
| RXFP3    | 1.854  | 0      |
| RXFP4    | 1.125  | 0      |
| RXRA     | 5.428  | 1.46   |
| RXRB     | 8.626  | 0.04   |
| RXRG     | 2.116  | 0      |
| RY1      | 1.404  | 10.26  |
| RYBP     | 2.7    | 8.49   |
| RYK      | 3.067  | 5.44   |
| RYR1     | 15.359 | 0      |
| RYR2     | 15.73  | 0.02   |
| RYR3     | 15.559 | 0.03   |
| S100A1   | 0.594  | 121.39 |
| S100A10  | 0.639  | 7.38   |
| S100A11  | 0.594  | 9.08   |
| S100A12  | 0.466  | 20.61  |
| S100A13  | 1.519  | 84.29  |
| S100A14  | 1.043  | 0.25   |
| S100A16  | 1.068  | 550.69 |
| S100A2   | 0.963  | 1.22   |
| S100A3   | 0.738  | 6.16   |
| S100A4   | 0.562  | 148.39 |
| S100A5   | 0.71   | 1.43   |
| S100A6   | 0.683  | 177.23 |
| S100A7   | 0.438  | 0      |
| S100A7A  | 4.279  | 0      |
| S100A7L2 | 0.306  | 0      |
| S100A8   | 0.408  | 145.35 |
| S100A9   | 0.575  | 133.17 |
| S100B    | 1.096  | 0      |
| S100G    | 0.453  | 0      |
| S100P    | 0.51   | 6.44   |
| S100PBP  | 4.612  | 4.68   |
| S100Z    | 1.017  | 1.24   |
| SAA1     | 0.779  | 0      |
| SAA2     | 0.527  | 0      |
| SAA3P    | 4.086  | 0      |
| SAA4     | 0.614  | 0      |
| SAAL1    | 1.51   | 5.46   |
| SAC      | 5.051  | 0      |

|         |        |       |
|---------|--------|-------|
| SAC3D1  | 1.538  | 15.06 |
| SACM1L  | 3.519  | 8.55  |
| SACS    | 14.79  | 1     |
| SAE1    | 2.109  | 62.59 |
| SAE2    | 2.665  | 23.39 |
| SAFB    | 2.988  | 46.2  |
| SAFB2   | 3.142  | 24.91 |
| SAG     | 1.565  | 0     |
| SAGE1   | 3.046  | 0     |
| SALF    | 3.824  | 0.03  |
| SALL1   | 4.669  | 0.02  |
| SALL2   | 4.913  | 1.73  |
| SALL3   | 4.775  | 0     |
| SALL4   | 3.452  | 0     |
| SAMD1   | 1.485  | 38.68 |
| SAMD10  | 2.176  | 2.17  |
| SAMD11  | 2.554  | 1.42  |
| SAMD12  | 2.1    | 0     |
| SAMD13  | 1.565  | 0     |
| SAMD14  | 1.859  | 0.37  |
| SAMD3   | 2.432  | 0.14  |
| SAMD4A  | 2.338  | 0.54  |
| SAMD4B  | 4.495  | 13.66 |
| SAMD7   | 2.265  | 0     |
| SAMD8   | 1.505  | 2.8   |
| SAMD9   | 15.155 | 3.54  |
| SAMD9L  | 14.264 | 2.17  |
| SAMHD1  | 2.701  | 6.36  |
| SAMM50  | 1.716  | 16.2  |
| SAMSN1  | 1.888  | 20.62 |
| SAP130  | 4.061  | 6.18  |
| SAP18   | 2.022  | 70.07 |
| SAP30   | 1.109  | 18.31 |
| SAP30BP | 2.519  | 16.62 |
| SAP30L  | 1.945  | 6.11  |
| SAPS1   | 3.928  | 84.52 |
| SAPS2   | 4.747  | 19.75 |
| SAPS3   | 4.958  | 14.11 |
| SAR1A   | 2.986  | 11.37 |
| SAR1B   | 1.365  | 5.18  |
| SAR1P3  | 0.573  | 0.14  |
| SARDH   | 3.344  | 1.21  |
| SARM1   | 6.861  | 0.41  |
| SARS    | 1.895  | 58.64 |
| SARS2   | 2.057  | 8.44  |
| SART1   | 3.561  | 33.71 |
| SART3   | 3.776  | 15.02 |
| SAS10   | 2.035  | 25.29 |
| SASH1   | 7.709  | 0.05  |
| SASP    | 2.172  | 1.44  |

|          |       |       |
|----------|-------|-------|
| SASS6    | 3.899 | 0.8   |
| SAS-ZFAT | 0.939 | 0.81  |
| SAT1     | 1.156 | 27.54 |
| SAT2     | 0.933 | 24.56 |
| SATB1    | 4.203 | 20.48 |
| SATB2    | 4.998 | 0.1   |
| SATL1    | 1.616 | 1.15  |
| SAV1     | 3.031 | 13.42 |
| SBDS     | 3.21  | 7.5   |
| SBDSP    | 10.68 | 0.53  |
| SBEM     | 0.396 | 0     |
| SBF1     | 7.267 | 24.38 |
| SBF2     | 7.405 | 2.08  |
| SBK1     | 4.992 | 0.1   |
| SBNO1    | 4.179 | 4.73  |
| SBNO2    | 4.877 | 11.93 |
| SBSN     | 0.957 | 0     |
| SC4MOL   | 2.288 | 1.07  |
| SC4MOP   | 0.882 | 0.19  |
| SC5DL    | 2.336 | 4.26  |
| SC65     | 2.602 | 0.48  |
| SCAMP1   | 8.202 | 1.32  |
| SCAMP2   | 2.398 | 54.94 |
| SCAMP3   | 1.883 | 40.31 |
| SCAMP4   | 2.526 | 21.81 |
| SCAMP5   | 3.382 | 2.71  |
| SCAND1   | 0.997 | 68.1  |
| SCAND2   | 6.81  | 0.99  |
| SCAP     | 4.255 | 28.39 |
| SCARA3   | 3.832 | 0     |
| SCARA5   | 3.643 | 0     |
| SCARB1   | 2.555 | 22.12 |
| SCARB2   | 4.748 | 8.12  |
| SCARF1   | 8.081 | 7.03  |
| SCARF2   | 3.624 | 0.14  |
| SCARNA1  | 0.166 | 0     |
| SCARNA11 | 0.137 | 0     |
| SCARNA12 | 0.27  | 2.18  |
| SCARNA15 | 0.311 | 8.67  |
| SCARNA16 | 0.475 | 6.38  |
| SCARNA17 | 0.421 | 12.2  |
| SCARNA2  | 0.42  | 4.82  |
| SCARNA20 | 0.13  | 0     |
| SCARNA21 | 0.138 | 4.27  |
| SCARNA22 | 0.125 | 5.39  |
| SCARNA23 | 0.13  | 0     |
| SCARNA3  | 0.144 | 0     |
| SCARNA4  | 0.129 | 0     |
| SCARNA5  | 0.278 | 0     |
| SCARNA6  | 0.266 | 0     |

|         |       |       |
|---------|-------|-------|
| SCARNA7 | 0.33  | 6.13  |
| SCARNA8 | 0.131 | 0     |
| SCARNA9 | 0.353 | 21.96 |
| SCC-112 | 6.714 | 18.89 |
| SCCPDH  | 2.474 | 13.35 |
| SCD     | 5.468 | 0.49  |
| SCD5    | 4.207 | 2.57  |
| SCEL    | 2.422 | 0     |
| SCFD1   | 2.33  | 3.76  |
| SCFD2   | 3.176 | 5.52  |
| SCG2    | 2.476 | 0     |
| SCG3    | 3.31  | 0     |
| SCG5    | 1.151 | 0.08  |
| SCGB1A1 | 0.425 | 0     |
| SCGB1C1 | 0.431 | 0     |
| SCGB1D1 | 0.429 | 0     |
| SCGB1D2 | 0.438 | 0     |
| SCGB1D4 | 0.434 | 0     |
| SCGB2A1 | 0.518 | 0     |
| SCGB2A2 | 0.502 | 0     |
| SCGB3A1 | 0.466 | 0.37  |
| SCGB3A2 | 0.515 | 0     |
| SCGN    | 1.482 | 0     |
| SCHIP1  | 2.626 | 23.06 |
| SCIN    | 5.14  | 0     |
| SCLT1   | 2.816 | 2.3   |
| SCLY    | 2.412 | 6.53  |
| SCMH1   | 4.741 | 25.9  |
| SCML1   | 3.392 | 0.05  |
| SCML2   | 4.131 | 2.86  |
| SCML4   | 2.055 | 0.12  |
| SCN10A  | 5.874 | 0     |
| SCN11A  | 6.502 | 0.05  |
| SCN1A   | 8.082 | 0     |
| SCN1B   | 2.278 | 51.73 |
| SCN2A   | 9.191 | 0.01  |
| SCN2B   | 4.921 | 0     |
| SCN3A   | 9.093 | 0.76  |
| SCN3B   | 6.697 | 0.76  |
| SCN4A   | 7.805 | 14.41 |
| SCN4B   | 4.486 | 0.02  |
| SCN5A   | 8.663 | 0.02  |
| SCN7A   | 5.377 | 0     |
| SCN8A   | 7.006 | 0.52  |
| SCN9A   | 6.357 | 0.03  |
| SCNM1   | 1.484 | 25.37 |
| SCNN1A  | 3.135 | 0.72  |
| SCNN1B  | 2.544 | 0     |
| SCNN1D  | 2.666 | 2.12  |
| SCNN1G  | 3.499 | 0     |



|          |        |       |
|----------|--------|-------|
| SCO1     | 1.701  | 8.62  |
| SCO2     | 1.272  | 11.12 |
| SCOC     | 1.958  | 2.92  |
| SCOTIN   | 2.166  | 79.1  |
| SCP2     | 4.928  | 9.42  |
| SCPEP1   | 1.919  | 16.2  |
| SCRG1    | 0.903  | 0     |
| SCRIB    | 5.208  | 12.61 |
| SCRL     | 3.1    | 0.11  |
| SCRN1    | 10.42  | 0.05  |
| SCRN2    | 1.644  | 30.49 |
| SCRN3    | 2.468  | 2.93  |
| SCRT1    | 3.552  | 0     |
| SCRT2    | 3.577  | 0.16  |
| SCT      | 0.514  | 0     |
| SCTR     | 1.701  | 0     |
| SCUBE1   | 2.992  | 0.08  |
| SCUBE2   | 3.737  | 1.83  |
| SCUBE3   | 5.115  | 0.07  |
| SCYE1    | 2.176  | 14.25 |
| SCYE1P   | 0.912  | 0.83  |
| SCYL1    | 2.57   | 29.4  |
| SCYL1BP1 | 2.186  | 2.04  |
| SCYL2    | 3.807  | 4.61  |
| SCYL3    | 3.577  | 2.17  |
| SDAD1    | 2.753  | 9.42  |
| SDC1     | 3.592  | 0.96  |
| SDC2     | 3.485  | 14.17 |
| SDC3     | 1.461  | 0.35  |
| SDC4     | 2.613  | 0.03  |
| SDC4P    | 0.467  | 0     |
| SDCBP    | 2.371  | 11.26 |
| SDCBP2   | 1.633  | 0.25  |
| SDCCAG1  | 4.121  | 5.03  |
| SDCCAG10 | 2.08   | 10.53 |
| SDCCAG3  | 2.379  | 15.97 |
| SDCCAG3L | 1.089  | 3.87  |
| SDCCAG8  | 2.142  | 10.15 |
| SDF2     | 1.075  | 29.85 |
| SDF2L1   | 0.874  | 43.27 |
| SDF4     | 2.97   | 40.59 |
| SDHA     | 2.276  | 58.89 |
| SDHALP1  | 3.157  | 2.83  |
| SDHALP2  | 46.009 | 0.38  |
| SDHAP3   | 23.621 | 0.52  |
| SDHB     | 1.098  | 33.75 |
| SDHC     | 5.281  | 8.2   |
| SDHD     | 1.313  | 13.02 |
| SDHDP6   | 1.292  | 1.11  |
| SDHDP7   | 1.29   | 1.44  |

|          |        |        |
|----------|--------|--------|
| SDK1     | 13.998 | 0.11   |
| SDK2     | 9.536  | 14.31  |
| SDPR     | 3.221  | 0.05   |
| SDR-O    | 0.942  | 0      |
| SDS      | 1.605  | 0      |
| SDSL     | 1.397  | 2.65   |
| SEBOX    | 1.641  | 0      |
| SEC11A   | 1.383  | 35.45  |
| SEC11B   | 0.894  | 5.84   |
| SEC11C   | 0.782  | 10.66  |
| SEC13    | 1.574  | 84.82  |
| SEC14L1  | 4.74   | 53.65  |
| SEC14L2  | 2.817  | 0.09   |
| SEC14L3  | 2.064  | 0.08   |
| SEC14L4  | 2.499  | 0.2    |
| SEC14L5  | 6.522  | 0      |
| SEC22A   | 1.793  | 2.44   |
| SEC22B   | 2.08   | 25.8   |
| SEC22C   | 2.056  | 4.63   |
| SEC23A   | 3.841  | 5.37   |
| SEC23B   | 3.949  | 11.67  |
| SEC23IP  | 4.243  | 8.93   |
| SEC24A   | 7.063  | 1.16   |
| SEC24B   | 4.743  | 5.06   |
| SEC24C   | 4.669  | 28.94  |
| SEC24D   | 3.99   | 5.59   |
| SEC31A   | 4.237  | 31.49  |
| SEC31B   | 4.612  | 4.38   |
| SEC61A1  | 3.636  | 82.26  |
| SEC61A2  | 2.241  | 5.41   |
| SEC61B   | 0.562  | 114.37 |
| SEC61G   | 1.102  | 10.85  |
| SEC63    | 3.849  | 23.26  |
| SEC63D1  | 2.668  | 0      |
| SECISBP2 | 3.467  | 5.49   |
| SECTM1   | 2.002  | 8.71   |
| SEDLP2   | 0.536  | 0      |
| SEDLP3   | 4.634  | 0      |
| SEDLP4   | 10.816 | 0      |
| SEDLP5   | 7.767  | 0      |
| SEH1L    | 4.18   | 6.67   |
| SEL1L    | 7.853  | 3.7    |
| SEL1L2   | 1.903  | 0      |
| SELE     | 3.833  | 0      |
| SELENBP1 | 1.705  | 2.07   |
| SELI     | 8.093  | 1.25   |
| SELK     | 0.818  | 13.7   |
| SELL     | 2.324  | 12.43  |
| SELM     | 0.691  | 8.78   |
| SELP     | 3.199  | 0      |

|        |        |       |
|--------|--------|-------|
| SELPLG | 2.543  | 2.95  |
| SELS   | 1.878  | 9.73  |
| SELT   | 3.49   | 8.83  |
| SELV   | 1.704  | 0     |
| SEMA3A | 5.046  | 0.03  |
| SEMA3B | 3.069  | 0.03  |
| SEMA3C | 10.353 | 0.01  |
| SEMA3D | 12.522 | 0     |
| SEMA3E | 12.947 | 0     |
| SEMA3F | 3.516  | 2.23  |
| SEMA3G | 4.7    | 0.66  |
| SEMA4A | 3.23   | 3.52  |
| SEMA4B | 4.063  | 1.97  |
| SEMA4C | 3.522  | 0.71  |
| SEMA4D | 4.628  | 7.97  |
| SEMA4F | 4.273  | 1.21  |
| SEMA4G | 4.4    | 0.27  |
| SEMA5A | 8.021  | 0     |
| SEMA5B | 4.707  | 0.43  |
| SEMA6A | 6.808  | 1.22  |
| SEMA6B | 4.634  | 1.67  |
| SEMA6C | 3.892  | 20.04 |
| SEMA6D | 10.56  | 0.03  |
| SEMA7A | 3.284  | 7.13  |
| SEMG1  | 2.755  | 0     |
| SEMG2  | 1.982  | 0     |
| SENP1  | 4.726  | 1.77  |
| SENP2  | 3.198  | 4.77  |
| SENP3  | 2.411  | 30.78 |
| SENP5  | 3.028  | 2.17  |
| SENP6  | 4.21   | 9.19  |
| SENP7  | 4.732  | 1.43  |
| SENP8  | 1.439  | 0.35  |
| SEP15  | 3.001  | 36.6  |
| SEPHS1 | 3.028  | 10.35 |
| SEPHS2 | 2.273  | 27.64 |
| SEPN1  | 4.332  | 68.56 |
| SEPP1  | 2.086  | 3.23  |
| SEPT1  | 1.59   | 3.13  |
| SEPT10 | 3.254  | 0     |
| SEPT11 | 5.555  | 13.3  |
| SEPT12 | 1.29   | 0     |
| SEPT2  | 3.799  | 35.77 |
| SEPT3  | 5.85   | 0.03  |
| SEPT4  | 2.841  | 1.01  |
| SEPT5  | 3.525  | 0.38  |
| SEPT6  | 8.895  | 63.07 |
| SEPT7  | 4.969  | 11.9  |
| SEPT9  | 3.902  | 288.7 |
| SEPW1  | 0.88   | 34.08 |

|           |       |        |
|-----------|-------|--------|
| SEPW1P    | 1.521 | 3.21   |
| SEPX1     | 1.367 | 20.09  |
| SERAC1    | 3.915 | 0.15   |
| SERBP1    | 6.914 | 19.64  |
| SERBP1P   | 3.059 | 2.73   |
| SERF1A    | 3.778 | 0.09   |
| SERF2     | 0.512 | 496.86 |
| SERGEF    | 1.494 | 4.73   |
| SERHL     | 1.346 | 4.95   |
| SERHL2    | 1.374 | 7.11   |
| SERINC1   | 3.128 | 12.9   |
| SERINC2   | 1.997 | 0.59   |
| SERINC3   | 3.651 | 21.5   |
| SERINC4   | 1.971 | 6.28   |
| SERINC5   | 3.002 | 8.3    |
| SERP1     | 2.743 | 39.93  |
| SERPINA1  | 2.154 | 2.51   |
| SERPINA10 | 2.453 | 0      |
| SERPINA11 | 1.471 | 0      |
| SERPINA12 | 2.061 | 0      |
| SERPINA13 | 1.718 | 0      |
| SERPINA2  | 1.752 | 0      |
| SERPINA3  | 1.59  | 0      |
| SERPINA4  | 1.661 | 0      |
| SERPINA5  | 2.227 | 0      |
| SERPINA6  | 1.492 | 0      |
| SERPINA7  | 1.559 | 0      |
| SERPINA9  | 1.346 | 0      |
| SERPINB1  | 1.942 | 41.16  |
| SERPINB10 | 1.194 | 0.42   |
| SERPINB11 | 1.179 | 0      |
| SERPINB12 | 1.218 | 0      |
| SERPINB13 | 3.114 | 0      |
| SERPINB2  | 1.901 | 0.04   |
| SERPINB3  | 1.694 | 0      |
| SERPINB4  | 1.698 | 0      |
| SERPINB5  | 2.557 | 0      |
| SERPINB6  | 1.646 | 28.14  |
| SERPINB7  | 3.047 | 0      |
| SERPINB8  | 3.928 | 2.81   |
| SERPINB9  | 4.107 | 6.44   |
| SERPINBP1 | 0.397 | 0      |
| SERPINC1  | 1.556 | 0      |
| SERPIND1  | 2.221 | 0.03   |
| SERPINE1  | 5.734 | 2.23   |
| SERPINE2  | 2.107 | 0.16   |
| SERPINF1  | 1.542 | 4.92   |
| SERPINF2  | 2.21  | 1.07   |
| SERPING1  | 2.005 | 14.45  |
| SERPINH1  | 2.204 | 48.31  |

|          |        |       |
|----------|--------|-------|
| SERPINI1 | 1.895  | 0.14  |
| SERPINI2 | 1.43   | 0.12  |
| SERTAD1  | 1.165  | 4.78  |
| SERTAD2  | 5.547  | 8.67  |
| SERTAD3  | 1.676  | 1.81  |
| SERTAD4  | 2.028  | 0     |
| SESN1    | 2.759  | 7.36  |
| SESN2    | 3.485  | 3.63  |
| SESN3    | 2.208  | 3.59  |
| SESTD1   | 3.214  | 3.33  |
| SET      | 2.559  | 68.11 |
| SET07p   | 2.982  | 0     |
| SETBP1   | 5.954  | 3.38  |
| SETD1A   | 6.447  | 11.2  |
| SETD1B   | 8.531  | 4.61  |
| SETD2    | 7.987  | 14.1  |
| SETD3    | 3.3    | 18.99 |
| SETD4    | 6.424  | 1.88  |
| SETD5    | 15.847 | 8.37  |
| SETD6    | 1.998  | 2.19  |
| SETD7    | 7.012  | 3.31  |
| SETD8    | 2.751  | 13.75 |
| SETDB1   | 4.363  | 14.75 |
| SETDB2   | 3.298  | 6.85  |
| SETMAR   | 2.058  | 3.48  |
| SETP2    | 3.161  | 0.32  |
| SETX     | 10.149 | 9.26  |
| SEZ6     | 4.318  | 0.02  |
| SEZ6L    | 3.407  | 0     |
| SEZ6L2   | 3.358  | 0.48  |
| SF1      | 6.668  | 61.01 |
| SF3A1    | 5.391  | 42.89 |
| SF3A2    | 1.65   | 88.63 |
| SF3A3    | 2.841  | 34.87 |
| SF3A3P1  | 1.477  | 9.64  |
| SF3A3P2  | 2.716  | 4.43  |
| SF3B1    | 4.658  | 45.8  |
| SF3B14   | 0.771  | 71.89 |
| SF3B2    | 2.894  | 87.03 |
| SF3B3    | 4.539  | 46.15 |
| SF3B4    | 1.549  | 80.32 |
| SF3B5    | 0.737  | 117.5 |
| SF4      | 2.075  | 17.01 |
| SF11     | 4.252  | 2.56  |
| SFMBT1   | 3.934  | 3.9   |
| SFMBT2   | 4.363  | 1.08  |
| SFN      | 1.315  | 0.25  |
| SFPQ     | 4.027  | 59.47 |
| SFPQP    | 2.847  | 1.06  |
| SFRP1    | 4.455  | 0.02  |

|         |       |        |
|---------|-------|--------|
| SFRP2   | 1.99  | 0.04   |
| SFRP4   | 5.634 | 0      |
| SFRP5   | 1.887 | 0.04   |
| SFRS1   | 2.75  | 61.26  |
| SFRS10  | 1.946 | 78.7   |
| SFRS11  | 2.775 | 31.39  |
| SFRS12  | 3.751 | 11.75  |
| SFRS14  | 5.769 | 17.07  |
| SFRS15  | 3.868 | 9.98   |
| SFRS16  | 2.234 | 19.31  |
| SFRS2   | 2.882 | 71.88  |
| SFRS2B  | 2.561 | 14.04  |
| SFRS2IP | 5.803 | 13.18  |
| SFRS3   | 2.806 | 67.24  |
| SFRS4   | 2.145 | 47.83  |
| SFRS5   | 1.786 | 243.46 |
| SFRS6   | 4.081 | 109.93 |
| SFRS7   | 2.83  | 44.11  |
| SFRS8   | 5.536 | 19.49  |
| SFRS9   | 1.411 | 82.15  |
| SFT2D1  | 0.691 | 9.63   |
| SFT2D2  | 1.155 | 3.65   |
| SFT2D3  | 2.811 | 4.65   |
| SFTPA1  | 0.968 | 0      |
| SFTPA2  | 2.139 | 0      |
| SFTP B  | 3.535 | 0.05   |
| SFTPC   | 0.991 | 0      |
| SFTPD   | 1.283 | 0      |
| SFTPG   | 1.266 | 0      |
| SFXN1   | 3.289 | 10.68  |
| SFXN2   | 2.559 | 3.19   |
| SFXN3   | 3.09  | 5.07   |
| SFXN4   | 2.229 | 5.48   |
| SFXN5   | 4.14  | 3.2    |
| SGCA    | 1.404 | 0.06   |
| SGCB    | 4.229 | 0.56   |
| SGCD    | 8.531 | 0      |
| SGCE    | 3.302 | 0.03   |
| SGCEP   | 1.641 | 0      |
| SGCG    | 1.624 | 0      |
| SGCZ    | 2.178 | 0      |
| SGEF    | 3.861 | 0      |
| SGIP1   | 4.554 | 0      |
| SGK     | 2.371 | 1.39   |
| SGK2    | 2.293 | 0      |
| SGK3    | 4.324 | 1.06   |
| SGOL1   | 2.722 | 1.39   |
| SGOL2   | 4.154 | 2.17   |
| SGPL1   | 5.105 | 14.45  |
| SGPP1   | 3.309 | 1.68   |

|           |        |        |
|-----------|--------|--------|
| SGPP2     | 1.2    | 0.63   |
| SGSH      | 2.682  | 5.78   |
| SGTA      | 2.315  | 31.4   |
| SGTB      | 2.649  | 0.57   |
| SH2B1     | 4.858  | 12.98  |
| SH2B2     | 3.971  | 1.97   |
| SH2B3     | 5.406  | 23.35  |
| SH2D1A    | 2.45   | 0.03   |
| SH2D1B    | 2.535  | 0      |
| SH2D2A    | 1.606  | 0.68   |
| SH2D3A    | 2.315  | 0.08   |
| SH2D3C    | 3.106  | 106.37 |
| SH2D4A    | 2.864  | 0.82   |
| SH2D4B    | 3.983  | 4.38   |
| SH2D5     | 6.101  | 0.02   |
| SH2D6     | 0.894  | 0      |
| SH3BGR    | 1.472  | 1.15   |
| SH3BGR L  | 1.743  | 40.21  |
| SH3BGR L2 | 4.646  | 0      |
| SH3BGR L3 | 0.884  | 460.34 |
| SH3BP1    | 2.576  | 1.15   |
| SH3BP2    | 7.3    | 17.3   |
| SH3BP4    | 5.183  | 0      |
| SH3BP5    | 3.44   | 36.83  |
| SH3BP5L   | 3.182  | 12.7   |
| SH3D19    | 5.182  | 0.14   |
| SH3GL1    | 2.443  | 23.72  |
| SH3GL2    | 2.487  | 0.17   |
| SH3GL3    | 2.012  | 0      |
| SH3GLB1   | 2.504  | 19.04  |
| SH3GLB2   | 1.984  | 16.9   |
| SH3GLP2   | 24.523 | 0.05   |
| SH3GLP3   | 27.17  | 0.33   |
| SH3KBP1   | 4.145  | 49.41  |
| SH3MD4    | 3.831  | 0.97   |
| SH3PX3    | 3.233  | 1.64   |
| SH3PXD2A  | 11.247 | 2.35   |
| SH3PXD2B  | 7.777  | 1.66   |
| SH3RF1    | 5.265  | 1.3    |
| SH3RF2    | 3.003  | 0      |
| SH3TC1    | 4.226  | 36.26  |
| SH3TC2    | 26.58  | 0.04   |
| SH3YL1    | 1.965  | 2.23   |
| SHANK1    | 6.643  | 4.71   |
| SHANK2    | 10.174 | 0.03   |
| SHANK3    | 7.145  | 17.65  |
| SHARPIN   | 1.764  | 24.07  |
| SHB       | 2.302  | 1.83   |
| SHBG      | 1.209  | 0      |
| SHC1      | 3.677  | 23.32  |

|           |       |       |
|-----------|-------|-------|
| SHC2      | 2.494 | 0     |
| SHC3      | 2.394 | 0     |
| SHC4      | 4.556 | 0.25  |
| SHCBP1    | 3.206 | 4.52  |
| SHCL1     | 3.507 | 0.48  |
| SHD       | 1.515 | 0     |
| SHE       | 6.243 | 0.05  |
| SHF       | 2.239 | 0.82  |
| SHFM1     | 0.996 | 37.38 |
| SHFM3P1   | 2.39  | 3.42  |
| SHH       | 8.219 | 15.55 |
| SHKBP1    | 2.328 | 36.15 |
| SHMT1     | 3.431 | 6.36  |
| SHMT2     | 2.095 | 37.87 |
| SHOC2     | 3.8   | 8.34  |
| SHOX      | 4.384 | 0     |
| SHOX2     | 3.753 | 0.09  |
| SHPRH     | 6.994 | 1.24  |
| SHQ1      | 2.848 | 5.44  |
| SHROOM1   | 3.19  | 0.03  |
| SHROOM2   | 7.445 | 0     |
| SHROOM3   | 7.556 | 0     |
| SHROOM4   | 6.003 | 0     |
| SI        | 6.01  | 0     |
| SIAE      | 2.839 | 1.01  |
| SIAH1     | 4.39  | 2.96  |
| SIAH2     | 2.62  | 9.03  |
| SIAHBP1   | 1.887 | 63.3  |
| SIDT1     | 4.575 | 10.39 |
| SIDT2     | 3.919 | 15.64 |
| SIGIRR    | 1.841 | 45.25 |
| SIGLEC1   | 6.72  | 1.09  |
| SIGLEC10  | 2.998 | 0.28  |
| SIGLEC11  | 3.165 | 0.03  |
| SIGLEC12  | 2.6   | 0     |
| SIGLEC5   | 2.089 | 0.48  |
| SIGLEC6   | 2.404 | 0     |
| SIGLEC7   | 2.244 | 0.11  |
| SIGLEC8   | 2.949 | 0     |
| SIGLEC9   | 1.69  | 0.3   |
| SIGLECP1  | 0.507 | 0     |
| SIGLECP10 | 0.478 | 0     |
| SIGLECP11 | 0.426 | 0     |
| SIGLECP12 | 0.762 | 0.11  |
| SIGLECP13 | 0.479 | 0     |
| SIGLECP14 | 0.428 | 0     |
| SIGLECP15 | 0.538 | 0     |
| SIGLECP16 | 7.774 | 0.08  |
| SIGLECP2  | 0.451 | 0     |
| SIGLECP3  | 8.285 | 0     |



|          |       |       |
|----------|-------|-------|
| SIGLECP4 | 0.426 | 0     |
| SIGLECP5 | 0.466 | 0     |
| SIGLECP6 | 0.48  | 0     |
| SIGLECP7 | 0.699 | 0     |
| SIGLECP8 | 0.354 | 0     |
| SIGLECP9 | 0.475 | 0     |
| SIKE     | 2.19  | 2.07  |
| SIL1     | 1.989 | 14.95 |
| SILV     | 2.126 | 0.76  |
| SIM1     | 3.995 | 0     |
| SIM2     | 5.482 | 0.02  |
| SIN3A    | 5.497 | 13.26 |
| SIN3B    | 5.129 | 9.64  |
| SIP1     | 1.893 | 1.29  |
| SIPA1    | 3.778 | 37.57 |
| SIPA1L1  | 6.007 | 3.21  |
| SIPA1L2  | 5.679 | 4.42  |
| SIPA1L3  | 7.984 | 8.05  |
| SIRPA    | 4.487 | 8.99  |
| SIRPB1   | 3.815 | 0.26  |
| SIRPB2   | 3.004 | 0.06  |
| SIRPD    | 0.812 | 0.1   |
| SIRPG    | 1.716 | 0.05  |
| SIRT1    | 4.09  | 3.63  |
| SIRT2    | 2.815 | 22.48 |
| SIRT3    | 3.26  | 5.37  |
| SIRT4    | 1.171 | 0.36  |
| SIRT5    | 2.941 | 3.03  |
| SIRT6    | 1.636 | 11.43 |
| SIRT7    | 1.713 | 16.52 |
| SIT1     | 1.238 | 1.43  |
| SIVA1    | 0.734 | 34.77 |
| SIX1     | 1.376 | 0.06  |
| SIX2     | 2.115 | 0     |
| SIX3     | 1.924 | 0.18  |
| SIX4     | 6.214 | 0     |
| SIX5     | 3.145 | 6.99  |
| SIX6     | 1.391 | 0     |
| SKAP1    | 1.531 | 0.22  |
| SKAP2    | 7.943 | 2.06  |
| SKI      | 3.965 | 5.57  |
| SKIL     | 3.059 | 1.07  |
| SKIP     | 6.802 | 0     |
| SKIV2L   | 12.51 | 0     |
| SKIV2L2  | 3.56  | 9.82  |
| SKP1A    | 3.204 | 35.68 |
| SKP2     | 1.8   | 6.97  |
| SLA      | 2.667 | 0.7   |
| SLA/LP   | 3.363 | 0.82  |
| SLA2     | 4.046 | 0.85  |

|          |       |       |
|----------|-------|-------|
| SLAIN1   | 2.598 | 5.71  |
| SLAIN2   | 6.472 | 3.08  |
| SLAMF1   | 1.791 | 0.28  |
| SLAMF6   | 2.733 | 2.86  |
| SLAMF7   | 2.657 | 0.38  |
| SLAMF8   | 3.178 | 7.08  |
| SLAMF9   | 1.12  | 0.08  |
| SLBP     | 1.725 | 23.93 |
| SLC10A1  | 1.579 | 0.16  |
| SLC10A2  | 3.777 | 0.45  |
| SLC10A3  | 2.124 | 6.7   |
| SLC10A4  | 1.652 | 0.1   |
| SLC10A5  | 1.317 | 0     |
| SLC10A6  | 1.134 | 0     |
| SLC10A7  | 4.103 | 1.13  |
| SLC11A1  | 2.567 | 0.39  |
| SLC11A2  | 4.105 | 2.01  |
| SLC12A1  | 3.362 | 0.03  |
| SLC12A2  | 6.86  | 1.5   |
| SLC12A3  | 3.131 | 0     |
| SLC12A4  | 3.84  | 3.2   |
| SLC12A5  | 6.042 | 0.32  |
| SLC12A6  | 3.767 | 4.99  |
| SLC12A7  | 5.231 | 16.79 |
| SLC12A8  | 3.482 | 0.05  |
| SLC12A9  | 6.586 | 11.04 |
| SLC13A1  | 7.593 | 0     |
| SLC13A2  | 1.946 | 0     |
| SLC13A3  | 4.481 | 0.19  |
| SLC13A4  | 5.792 | 0.12  |
| SLC13A5  | 3.207 | 0     |
| SLC14A1  | 2.72  | 0.34  |
| SLC14A2  | 4.167 | 0     |
| SLC15A1  | 3.105 | 0     |
| SLC15A2  | 2.831 | 1.13  |
| SLC15A3  | 2.113 | 8.21  |
| SLC15A4  | 2.768 | 8.34  |
| SLC16A1  | 3.355 | 6.91  |
| SLC16A10 | 2.471 | 0.2   |
| SLC16A11 | 1.803 | 0.09  |
| SLC16A12 | 3.9   | 0     |
| SLC16A13 | 1.281 | 7.69  |
| SLC16A14 | 4.294 | 5.97  |
| SLC16A2  | 4.37  | 15.32 |
| SLC16A3  | 3.6   | 20.1  |
| SLC16A4  | 2.529 | 0.37  |
| SLC16A5  | 1.929 | 1.96  |
| SLC16A6  | 2.659 | 0     |
| SLC16A7  | 3.541 | 0.33  |
| SLC16A8  | 1.875 | 1.75  |

|            |        |       |
|------------|--------|-------|
| SLC16A9    | 3.646  | 2.01  |
| SLC17A1    | 1.548  | 0     |
| SLC17A2    | 2.27   | 0     |
| SLC17A3    | 1.75   | 0     |
| SLC17A4    | 2.598  | 0     |
| SLC17A5    | 3.273  | 0.62  |
| SLC17A6    | 3.919  | 0     |
| SLC17A7    | 2.949  | 0.08  |
| SLC17A8    | 3.846  | 0     |
| SLC18A1    | 2.747  | 0     |
| SLC18A2    | 1.894  | 0     |
| SLC18A3    | 2.419  | 0     |
| SLC19A1    | 4.332  | 7.45  |
| SLC19A2    | 3.651  | 0.03  |
| SLC19A3    | 3.767  | 0     |
| SLC1A1     | 3.722  | 0.03  |
| SLC1A2     | 11.696 | 0     |
| SLC1A3     | 3.936  | 0.69  |
| SLC1A4     | 4.502  | 6.42  |
| SLC1A5     | 2.844  | 35.6  |
| SLC1A6     | 1.719  | 0     |
| SLC1A7     | 2.637  | 0     |
| SLC20A1    | 3.286  | 13.77 |
| SLC20A2    | 3.656  | 4.95  |
| SLC22A1    | 2.109  | 0.04  |
| SLC22A10   | 2.187  | 0     |
| SLC22A11   | 2.512  | 0     |
| SLC22A12   | 4.413  | 0     |
| SLC22A13   | 2.527  | 0     |
| SLC22A14   | 2.201  | 0.04  |
| SLC22A15   | 4.07   | 0     |
| SLC22A16   | 1.971  | 14.91 |
| SLC22A17   | 3.002  | 0.03  |
| SLC22A18   | 1.613  | 9.61  |
| SLC22A18AS | 1.341  | 0.31  |
| SLC22A2    | 4.746  | 0     |
| SLC22A3    | 5.624  | 0.09  |
| SLC22A4    | 2.192  | 0.34  |
| SLC22A5    | 3.237  | 0.93  |
| SLC22A6    | 2.889  | 0     |
| SLC22A7    | 2.559  | 0.03  |
| SLC22A8    | 2.178  | 0     |
| SLC22A9    | 2.327  | 0     |
| SLC23A1    | 2.388  | 2.18  |
| SLC23A2    | 7.056  | 6.1   |
| SLC23A3    | 1.935  | 0.04  |
| SLC24A1    | 5.377  | 8.04  |
| SLC24A2    | 2.221  | 0     |
| SLC24A3    | 3.889  | 0     |
| SLC24A4    | 4.718  | 0.02  |

|           |       |        |
|-----------|-------|--------|
| SLC24A5   | 1.617 | 0      |
| SLC24A6   | 4.073 | 11.08  |
| SLC25A1   | 1.583 | 34.06  |
| SLC25A10  | 1.885 | 3.93   |
| SLC25A11  | 1.49  | 42.97  |
| SLC25A12  | 2.95  | 3.77   |
| SLC25A13  | 6.272 | 1.27   |
| SLC25A14  | 1.661 | 3.4    |
| SLC25A15  | 1.621 | 3.32   |
| SLC25A16  | 2.543 | 1.43   |
| SLC25A17  | 2.266 | 4.57   |
| SLC25A18  | 2.087 | 0.08   |
| SLC25A19  | 1.651 | 8.27   |
| SLC25A2   | 1.417 | 0.18   |
| SLC25A20  | 1.787 | 30.41  |
| SLC25A20P | 1.716 | 1.47   |
| SLC25A21  | 1.995 | 0.08   |
| SLC25A22  | 2.754 | 7.09   |
| SLC25A23  | 3.46  | 1.56   |
| SLC25A24  | 3.83  | 3.45   |
| SLC25A25  | 4.162 | 12.47  |
| SLC25A26  | 2.617 | 3.6    |
| SLC25A27  | 2.007 | 0.04   |
| SLC25A28  | 1.889 | 18.02  |
| SLC25A29  | 3.445 | 16.21  |
| SLC25A3   | 4.66  | 74.51  |
| SLC25A30  | 1.716 | 11.83  |
| SLC25A31  | 1.793 | 0.05   |
| SLC25A32  | 2.827 | 3.58   |
| SLC25A33  | 1.461 | 4.85   |
| SLC25A34  | 3.07  | 0.71   |
| SLC25A35  | 2.785 | 3.14   |
| SLC25A36  | 2.672 | 7.19   |
| SLC25A37  | 2.154 | 15.48  |
| SLC25A38  | 2.003 | 12.83  |
| SLC25A39  | 1.55  | 71.63  |
| SLC25A4   | 1.326 | 4.77   |
| SLC25A40  | 3.243 | 2.52   |
| SLC25A41  | 1.63  | 0      |
| SLC25A42  | 3.117 | 6.54   |
| SLC25A43  | 2.776 | 1.58   |
| SLC25A44  | 3.463 | 7.05   |
| SLC25A45  | 2.432 | 2.18   |
| SLC25A46  | 2.326 | 6.12   |
| SLC25A5   | 1.225 | 230.01 |
| SLC25A6   | 1.439 | 757.54 |
| SLC25A6P1 | 0.725 | 0      |
| SLC26A1   | 4.187 | 0.31   |
| SLC26A10  | 3.04  | 0      |
| SLC26A11  | 2.872 | 0.79   |

|          |       |        |
|----------|-------|--------|
| SLC26A2  | 7.36  | 0.86   |
| SLC26A3  | 5.709 | 0      |
| SLC26A4  | 9.857 | 0.01   |
| SLC26A5  | 6.108 | 0      |
| SLC26A6  | 3.514 | 2.95   |
| SLC26A7  | 5.764 | 0.02   |
| SLC26A8  | 3.94  | 0.04   |
| SLC26A9  | 6.979 | 0.2    |
| SLC27A1  | 3.547 | 12.42  |
| SLC27A2  | 2.343 | 0.21   |
| SLC27A3  | 2.413 | 48.21  |
| SLC27A4  | 2.948 | 9.37   |
| SLC27A5  | 2.277 | 1.15   |
| SLC27A6  | 3.234 | 0      |
| SLC28A1  | 3.41  | 0      |
| SLC28A2  | 2.458 | 0.07   |
| SLC28A3  | 2.209 | 0.03   |
| SLC29A1  | 2.162 | 4.01   |
| SLC29A2  | 2.515 | 2.95   |
| SLC29A3  | 2.24  | 7.1    |
| SLC29A4  | 5.72  | 0.08   |
| SLC2A1   | 2.855 | 24.34  |
| SLC2A10  | 4.236 | 0.1    |
| SLC2A11  | 2.314 | 3.46   |
| SLC2A12  | 5.599 | 0.09   |
| SLC2A13  | 7.003 | 0.11   |
| SLC2A14  | 2.195 | 0.61   |
| SLC2A2   | 3.439 | 0      |
| SLC2A3   | 3.914 | 9.88   |
| SLC2A3P2 | 2.704 | 0.35   |
| SLC2A4   | 3.149 | 0.03   |
| SLC2A4RG | 2.279 | 6.06   |
| SLC2A5   | 2.219 | 202.52 |
| SLC2A6   | 2.487 | 0.65   |
| SLC2A7   | 1.575 | 1.28   |
| SLC2A8   | 2.118 | 0.08   |
| SLC2A9   | 3.592 | 16.37  |
| SLC30A1  | 2.018 | 1.88   |
| SLC30A10 | 4.655 | 0      |
| SLC30A2  | 2.473 | 0      |
| SLC30A3  | 2.093 | 0      |
| SLC30A4  | 4.287 | 0.15   |
| SLC30A5  | 3.979 | 6.46   |
| SLC30A6  | 2.707 | 1.99   |
| SLC30A7  | 5.867 | 0.62   |
| SLC30A8  | 5.373 | 0      |
| SLC30A9  | 3.261 | 5.22   |
| SLC31A1  | 4.718 | 4.96   |
| SLC31A2  | 1.693 | 3.54   |
| SLC32A1  | 2.574 | 0.03   |

|          |        |       |
|----------|--------|-------|
| SLC33A1  | 2.659  | 6.46  |
| SLC34A1  | 2.563  | 0.03  |
| SLC34A2  | 2.25   | 0     |
| SLC34A3  | 2.124  | 0.12  |
| SLC35A1  | 1.844  | 6.08  |
| SLC35A2  | 2.751  | 8.69  |
| SLC35A3  | 2.149  | 1.33  |
| SLC35A4  | 2.657  | 38.8  |
| SLC35A5  | 2.94   | 5.13  |
| SLC35B1  | 1.186  | 24.72 |
| SLC35B2  | 2.024  | 24.56 |
| SLC35B3  | 2.04   | 4.91  |
| SLC35B4  | 13.59  | 1.92  |
| SLC35C1  | 2.793  | 8.09  |
| SLC35C2  | 2.824  | 14.97 |
| SLC35D1  | 1.272  | 1.12  |
| SLC35D2  | 1.571  | 10.72 |
| SLC35D3  | 2.359  | 0     |
| SLC35E1  | 3.858  | 8.12  |
| SLC35E2  | 1.545  | 5.94  |
| SLC35E3  | 2.552  | 11.26 |
| SLC35E4  | 1.266  | 0.54  |
| SLC35F1  | 4.844  | 0     |
| SLC35F2  | 2.91   | 7.61  |
| SLC35F3  | 2.891  | 0.06  |
| SLC35F4  | 1.779  | 0     |
| SLC35F5  | 2.855  | 1.48  |
| SLC36A1  | 5.773  | 0.25  |
| SLC36A2  | 3.389  | 0     |
| SLC36A3  | 2.456  | 0     |
| SLC36A4  | 2.465  | 0.37  |
| SLC37A1  | 3.094  | 6.65  |
| SLC37A2  | 2.696  | 0.22  |
| SLC37A3  | 10.129 | 1.7   |
| SLC37A4  | 2.52   | 7.62  |
| SLC38A1  | 7.965  | 59.82 |
| SLC38A2  | 4.786  | 20.93 |
| SLC38A3  | 2.437  | 0     |
| SLC38A4  | 3.942  | 0.04  |
| SLC38A5  | 2.655  | 9.23  |
| SLC38A6  | 1.516  | 0.94  |
| SLC39A1  | 2.427  | 28.53 |
| SLC39A10 | 5.227  | 4.74  |
| SLC39A11 | 2.737  | 7.44  |
| SLC39A12 | 2.635  | 0.13  |
| SLC39A13 | 2.289  | 14.13 |
| SLC39A14 | 4.611  | 7.55  |
| SLC39A2  | 1.358  | 0     |
| SLC39A3  | 4.158  | 8.8   |
| SLC39A4  | 3.124  | 4.88  |

|          |        |       |
|----------|--------|-------|
| SLC39A5  | 5.464  | 10.28 |
| SLC39A6  | 2.733  | 7.06  |
| SLC39A7  | 7.077  | 0     |
| SLC39A8  | 3.292  | 10.88 |
| SLC39A9  | 4.293  | 8.28  |
| SLC3A1   | 2.3    | 0.59  |
| SLC3A2   | 3.127  | 41.27 |
| SLC40A1  | 3.431  | 1.38  |
| SLC41A1  | 4.854  | 34.02 |
| SLC41A2  | 2.418  | 0.03  |
| SLC41A3  | 3.087  | 18.23 |
| SLC43A1  | 2.498  | 18.95 |
| SLC43A2  | 3.001  | 4.21  |
| SLC43A3  | 2.822  | 94.41 |
| SLC44A1  | 4.4    | 48.26 |
| SLC44A2  | 3.373  | 48.6  |
| SLC44A3  | 2.061  | 1.35  |
| SLC44A4  | 8.967  | 0     |
| SLC44A5  | 2.288  | 0.11  |
| SLC45A1  | 2.401  | 0     |
| SLC45A2  | 3.226  | 0     |
| SLC45A3  | 3.382  | 25.98 |
| SLC45A4  | 8.831  | 0.19  |
| SLC4A1   | 3.636  | 10.12 |
| SLC4A10  | 3.931  | 0     |
| SLC4A11  | 3.094  | 0.52  |
| SLC4A1AP | 2.954  | 8.04  |
| SLC4A2   | 8.112  | 9.26  |
| SLC4A3   | 4.685  | 0     |
| SLC4A4   | 7.588  | 0     |
| SLC4A5   | 4.034  | 0.33  |
| SLC4A7   | 7.757  | 0.54  |
| SLC4A8   | 6.107  | 0.03  |
| SLC4A9   | 3.086  | 0.03  |
| SLC5A1   | 2.45   | 0     |
| SLC5A10  | 2.201  | 0.2   |
| SLC5A11  | 2.35   | 0.03  |
| SLC5A12  | 2.269  | 0     |
| SLC5A2   | 2.271  | 1.93  |
| SLC5A3   | 2.157  | 4.72  |
| SLC5A4   | 2.02   | 0     |
| SLC5A5   | 2.49   | 0.03  |
| SLC5A6   | 3.145  | 19.37 |
| SLC5A7   | 5.146  | 0     |
| SLC5A8   | 3.982  | 0     |
| SLC5A9   | 3.227  | 0.05  |
| SLC6A1   | 4.46   | 0     |
| SLC6A10P | 11.506 | 0     |
| SLC6A11  | 1.991  | 0     |
| SLC6A12  | 3.372  | 0.03  |

|          |       |       |
|----------|-------|-------|
| SLC6A13  | 2.185 | 0     |
| SLC6A14  | 4.519 | 0     |
| SLC6A15  | 7.991 | 0     |
| SLC6A16  | 2.936 | 0.2   |
| SLC6A17  | 6.42  | 0     |
| SLC6A18  | 2.12  | 0     |
| SLC6A19  | 1.905 | 0.14  |
| SLC6A2   | 3.347 | 0     |
| SLC6A20  | 5.358 | 0.11  |
| SLC6A3   | 3.932 | 0     |
| SLC6A4   | 2.756 | 0.06  |
| SLC6A5   | 2.716 | 0     |
| SLC6A6   | 5.542 | 11.29 |
| SLC6A6P  | 1.803 | 0.14  |
| SLC6A7   | 3.739 | 0     |
| SLC6A8   | 3.917 | 0.95  |
| SLC6A9   | 3.647 | 1.41  |
| SLC7A1   | 7.239 | 4.23  |
| SLC7A10  | 1.897 | 0.04  |
| SLC7A11  | 9.648 | 0.02  |
| SLC7A13  | 1.865 | 0     |
| SLC7A14  | 2.909 | 0     |
| SLC7A2   | 7.633 | 0.01  |
| SLC7A3   | 2.223 | 0     |
| SLC7A4   | 2.311 | 0     |
| SLC7A5   | 4.543 | 83.66 |
| SLC7A6   | 6.25  | 18.52 |
| SLC7A6OS | 1.607 | 13.05 |
| SLC7A7   | 2.447 | 0.62  |
| SLC7A8   | 4.485 | 0.56  |
| SLC7A9   | 1.76  | 0     |
| SLC8A1   | 3.194 | 1.34  |
| SLC8A2   | 4.282 | 0.42  |
| SLC8A3   | 5.853 | 0     |
| SLC9A1   | 4.517 | 12.93 |
| SLC9A10  | 4.123 | 0     |
| SLC9A11  | 4.367 | 0.33  |
| SLC9A2   | 5.442 | 0.02  |
| SLC9A3   | 2.584 | 0.55  |
| SLC9A3P2 | 1.894 | 0     |
| SLC9A3R1 | 1.984 | 75.32 |
| SLC9A3R2 | 2.097 | 43.63 |
| SLC9A4   | 4.134 | 0     |
| SLC9A5   | 3.726 | 0     |
| SLC9A6   | 4.454 | 2.99  |
| SLC9A7   | 2.856 | 4.81  |
| SLC9A8   | 6.255 | 2.44  |
| SLC9A9   | 3.543 | 14.22 |
| SLCO1A2  | 4.427 | 0     |
| SLCO1B1  | 2.779 | 0     |



|         |       |       |
|---------|-------|-------|
| SLCO1B3 | 2.631 | 0     |
| SLCO1C1 | 3.365 | 0     |
| SLCO2A1 | 4.031 | 0.19  |
| SLCO2B1 | 4.068 | 74.98 |
| SLCO3A1 | 2.74  | 0.12  |
| SLCO4A1 | 2.776 | 1.95  |
| SLCO4C1 | 5.334 | 0.05  |
| SLCO5A1 | 3.692 | 0     |
| SLCO6A1 | 2.524 | 0     |
| SLFN11  | 4.896 | 3.97  |
| SLFN12  | 2.383 | 0.36  |
| SLFN13  | 8.385 | 3.6   |
| SLFN14  | 2.739 | 0.28  |
| SLFN5   | 2.836 | 2.4   |
| SLFNL1  | 1.953 | 0.87  |
| SLIC1   | 2.449 | 11.14 |
| SLIT1   | 5.342 | 0.5   |
| SLIT2   | 4.95  | 0     |
| SLIT3   | 5.015 | 0     |
| SLITRK1 | 5.186 | 0     |
| SLITRK2 | 5.009 | 0     |
| SLITRK3 | 4.222 | 0     |
| SLITRK4 | 3.383 | 0     |
| SLITRK5 | 4.447 | 0     |
| SLITRK6 | 4.181 | 0     |
| SLK     | 5.988 | 4.72  |
| SLMAP   | 4.42  | 4.19  |
| SLMO1   | 1.682 | 0.35  |
| SLMO2   | 2.527 | 13.3  |
| SLN     | 0.717 | 0     |
| SLPI    | 0.598 | 1.83  |
| SLTM    | 5.744 | 14.74 |
| SLU7    | 2.331 | 15.07 |
| SLURP1  | 0.537 | 0     |
| SMA4    | 2.362 | 0     |
| SMA5    | 3.523 | 0     |
| SMAD1   | 3.12  | 3.7   |
| SMAD2   | 5.466 | 9.97  |
| SMAD3   | 6.235 | 14.86 |
| SMAD4   | 3.474 | 9.14  |
| SMAD5   | 7.095 | 1.05  |
| SMAD6   | 2.907 | 0.08  |
| SMAD7   | 3.087 | 5.02  |
| SMAD9   | 1.925 | 0     |
| SMAF1   | 0.77  | 0     |
| SMAP1   | 3.129 | 7.56  |
| SMAP1L  | 2.841 | 68.82 |
| SMARCA1 | 4.285 | 0     |
| SMARCA2 | 6.034 | 28.13 |
| SMARCA4 | 5.681 | 58.73 |

|          |        |        |
|----------|--------|--------|
| SMARCA5  | 4.109  | 22.81  |
| SMARCAD1 | 4.916  | 3.46   |
| SMARCAL1 | 3.04   | 5.98   |
| SMARCB1  | 1.815  | 105.26 |
| SMARCC1  | 5.749  | 24.95  |
| SMARCC2  | 4.215  | 29.02  |
| SMARCD1  | 3.331  | 32.27  |
| SMARCD2  | 2.704  | 65.48  |
| SMARCD3  | 3.84   | 0.42   |
| SMARCE1  | 2.425  | 52.07  |
| SMC1A    | 9.725  | 15.84  |
| SMC1B    | 4.253  | 0.18   |
| SMC2     | 4.529  | 5.65   |
| SMC3     | 4.112  | 10.47  |
| SMC4     | 7.052  | 14.04  |
| SMC5     | 3.492  | 2.8    |
| SMC6     | 5.134  | 19.23  |
| SMCHD1   | 8.462  | 4.15   |
| SMCP     | 0.77   | 0      |
| SMCR7    | 3.639  | 1.53   |
| SMCR7L   | 5.699  | 6.03   |
| SMCR8    | 3.206  | 2.05   |
| SMCYP    | 0.875  | 0      |
| SMEK1    | 4.433  | 10.56  |
| SMEK2    | 4.409  | 11.63  |
| SMEK3P   | 3.133  | 0      |
| SMG1     | 15.725 | 4.51   |
| SMG5     | 4.563  | 20.58  |
| SMG6     | 5.913  | 9.59   |
| SMG7     | 6.728  | 12.44  |
| SMN1     | 3.246  | 0.29   |
| SMN2     | 4.398  | 0.09   |
| SMNDC1   | 2.019  | 10.1   |
| SMNP     | 0.832  | 5.06   |
| SMO      | 7.476  | 4.57   |
| SMOC1    | 3.683  | 0.09   |
| SMOC2    | 2.947  | 0.14   |
| SMOX     | 2.875  | 11.4   |
| SMPD1    | 3.272  | 4.43   |
| SMPD2    | 1.68   | 13.09  |
| SMPD3    | 5.264  | 1.12   |
| SMPD4    | 5.244  | 9.27   |
| SMPDL3A  | 1.742  | 0.05   |
| SMPDL3B  | 2.405  | 0.1    |
| SMPX     | 0.886  | 0      |
| SMR3A    | 0.598  | 0      |
| SMR3B    | 0.785  | 0      |
| SMS      | 1.688  | 21.66  |
| SMTN     | 3.671  | 3.71   |
| SMTNL1   | 2.062  | 0.29   |

|          |        |        |
|----------|--------|--------|
| SMTNL2   | 1.919  | 0.04   |
| SMU1     | 1.702  | 12.22  |
| SMUG1    | 1.57   | 5.47   |
| SMURF1   | 11.823 | 2.99   |
| SMURF2   | 3.866  | 2.35   |
| SMYD1    | 4.347  | 0      |
| SMYD2    | 1.671  | 8.42   |
| SMYD3    | 1.458  | 7.74   |
| SMYD4    | 4.229  | 2.31   |
| SMYD5    | 2.543  | 8.34   |
| SNAG1    | 2.183  | 11.77  |
| SNAI1    | 1.695  | 22.56  |
| SNAI1L1  | 1.666  | 0.36   |
| SNAI2    | 2.101  | 0.2    |
| SNAI3    | 1.629  | 0.67   |
| SNAP23   | 2.307  | 19.64  |
| SNAP23P  | 0.246  | 8.56   |
| SNAP25   | 2.171  | 0      |
| SNAP29   | 2.869  | 8.6    |
| SNAP91   | 4.369  | 0      |
| SNAPAP   | 0.96   | 31.94  |
| SNAPC1   | 2.564  | 1.58   |
| SNAPC2   | 1.513  | 8.51   |
| SNAPC3   | 3.095  | 3.65   |
| SNAPC4   | 4.65   | 4.68   |
| SNAPC5   | 0.965  | 14.06  |
| SNCA     | 2.3    | 2.2    |
| SNCAIP   | 3.569  | 0      |
| SNCB     | 1.45   | 0.29   |
| SNCG     | 0.697  | 0.12   |
| SND1     | 7.016  | 38.6   |
| SNED1    | 6.834  | 0.17   |
| SNF1LK   | 4.712  | 11.42  |
| SNF1LK2  | 5.681  | 2.55   |
| SNF8     | 1.214  | 32.61  |
| SNFT     | 0.98   | 1.8    |
| SNHG5    | 0.435  | 50.35  |
| SNHG6    | 0.472  | 148.66 |
| SNHG8    | 0.874  | 8.57   |
| SNIP     | 4.114  | 0      |
| SNIP1    | 2.471  | 2.66   |
| SNN      | 3.274  | 5.35   |
| SNORA1   | 0.13   | 0      |
| SNORA10  | 0.133  | 4.44   |
| SNORA11  | 0.131  | 0.65   |
| SNORA12  | 0.147  | 2.87   |
| SNORA13  | 0.133  | 0      |
| SNORA14A | 0.268  | 0      |
| SNORA14B | 0.135  | 0      |
| SNORA15  | 0.266  | 0      |

|          |       |        |
|----------|-------|--------|
| SNORA16A | 0.134 | 2.52   |
| SNORA17  | 0.464 | 23.06  |
| SNORA18  | 0.132 | 0      |
| SNORA19  | 0.128 | 0      |
| SNORA20  | 0.132 | 0      |
| SNORA21  | 0.133 | 1.27   |
| SNORA22  | 0.268 | 0.94   |
| SNORA23  | 0.189 | 0      |
| SNORA24  | 0.719 | 140.82 |
| SNORA26  | 0.265 | 13.66  |
| SNORA27  | 0.126 | 0      |
| SNORA28  | 0.126 | 0      |
| SNORA29  | 0.14  | 0      |
| SNORA2A  | 0.135 | 0      |
| SNORA2B  | 0.137 | 0.61   |
| SNORA3   | 0.13  | 0.65   |
| SNORA30  | 0.129 | 0      |
| SNORA31  | 0.13  | 3.24   |
| SNORA33  | 0.133 | 5.06   |
| SNORA34  | 0.137 | 1.23   |
| SNORA35  | 0.128 | 0      |
| SNORA36A | 0.132 | 1.27   |
| SNORA37  | 0.129 | 0      |
| SNORA38  | 0.396 | 0      |
| SNORA4   | 0.137 | 2.46   |
| SNORA40  | 0.127 | 0.66   |
| SNORA41  | 0.132 | 0.64   |
| SNORA42  | 0.134 | 0      |
| SNORA43  | 0.533 | 20.39  |
| SNORA44  | 0.132 | 5.11   |
| SNORA45  | 0.131 | 3.22   |
| SNORA46  | 0.135 | 0      |
| SNORA47  | 0.138 | 3.05   |
| SNORA48  | 0.135 | 17.48  |
| SNORA49  | 0.137 | 0      |
| SNORA50  | 0.136 | 0      |
| SNORA51  | 0.132 | 1.27   |
| SNORA52  | 0.134 | 6.29   |
| SNORA53  | 0.25  | 0      |
| SNORA54  | 0.123 | 2.06   |
| SNORA55  | 0.137 | 0      |
| SNORA56  | 0.129 | 2.61   |
| SNORA58  | 0.137 | 0      |
| SNORA59B | 0.152 | 2.77   |
| SNORA5A  | 0.268 | 0.31   |
| SNORA5B  | 0.264 | 0      |
| SNORA5C  | 0.274 | 0.61   |
| SNORA6   | 0.149 | 0.57   |
| SNORA60  | 0.136 | 0      |
| SNORA61  | 0.13  | 3.89   |

|             |       |        |
|-------------|-------|--------|
| SNORA62     | 0.154 | 1.1    |
| SNORA63     | 0.135 | 6.86   |
| SNORA64     | 0.134 | 7.55   |
| SNORA65     | 0.136 | 2.48   |
| SNORA66     | 0.133 | 3.17   |
| SNORA67     | 0.137 | 21.52  |
| SNORA68     | 0.133 | 5.06   |
| SNORA69     | 0.132 | 0      |
| SNORA70     | 0.135 | 11.23  |
| SNORA71A    | 0.138 | 5.49   |
| SNORA71B    | 0.448 | 16.55  |
| SNORA71C    | 0.138 | 0      |
| SNORA71D    | 0.463 | 9.82   |
| SNORA72     | 0.132 | 0.64   |
| SNORA73A    | 0.207 | 38.25  |
| SNORA74A    | 0.2   | 0      |
| SNORA74B    | 0.204 | 0      |
| SNORA75     | 0.137 | 0.61   |
| SNORA76     | 0.486 | 63.78  |
| SNORA77     | 0.125 | 0.67   |
| SNORA78     | 0.127 | 0.66   |
| SNORA79     | 0.14  | 0      |
| SNORA7B     | 0.139 | 1.22   |
| SNORA8      | 0.139 | 2.42   |
| SNORA80     | 0.136 | 0      |
| SNORA81     | 0.178 | 0.48   |
| SNORA9      | 0.633 | 12.25  |
| SNORD10     | 0.148 | 3.99   |
| SNORD100    | 0.1   | 0      |
| SNORD101    | 0.1   | 0      |
| SNORD102    | 0.1   | 2.52   |
| SNORD107    | 0.1   | 0      |
| SNORD108    | 0.1   | 0      |
| SNORD109A   | 0.1   | 0      |
| SNORD109B   | 0.1   | 0      |
| SNORD11     | 0.1   | 0      |
| SNORD115@   | 0.1   | 0      |
| SNORD115-1  | 0.1   | 0      |
| SNORD116@   | 0.1   | 0      |
| SNORD116-19 | 0.1   | 0      |
| SNORD12     | 0.511 | 153.14 |
| SNORD13     | 0.104 | 1.62   |
| SNORD14A    | 0.1   | 1.68   |
| SNORD14B    | 0.1   | 0.84   |
| SNORD15A    | 0.148 | 0.57   |
| SNORD15B    | 0.146 | 2.31   |
| SNORD16     | 0.1   | 0.84   |
| SNORD18A    | 0.1   | 0      |
| SNORD18B    | 0.1   | 0      |
| SNORD18C    | 0.1   | 0.84   |

|          |       |       |
|----------|-------|-------|
| SNORD2   | 0.1   | 0     |
| SNORD20  | 0.1   | 2.52  |
| SNORD21  | 0.1   | 0.84  |
| SNORD22  | 0.789 | 43.66 |
| SNORD25  | 0.1   | 2.52  |
| SNORD26  | 0.1   | 3.37  |
| SNORD27  | 0.174 | 20.82 |
| SNORD28  | 0.1   | 1.68  |
| SNORD29  | 0.1   | 0.84  |
| SNORD30  | 0.1   | 0     |
| SNORD31  | 0.1   | 3.37  |
| SNORD32A | 0.1   | 9.26  |
| SNORD33  | 0.1   | 5.9   |
| SNORD34  | 0.1   | 6.74  |
| SNORD35A | 0.1   | 8.42  |
| SNORD35B | 0.1   | 5.9   |
| SNORD37  | 0.1   | 0     |
| SNORD38A | 0.1   | 4.21  |
| SNORD38B | 0.1   | 5.06  |
| SNORD41  | 0.1   | 0     |
| SNORD42A | 0.1   | 0     |
| SNORD42B | 0.1   | 0.84  |
| SNORD43  | 0.1   | 0     |
| SNORD44  | 0.1   | 4.21  |
| SNORD45A | 0.1   | 0     |
| SNORD45B | 0.1   | 0     |
| SNORD46  | 0.1   | 1.68  |
| SNORD47  | 0.1   | 2.52  |
| SNORD48  | 0.19  | 0     |
| SNORD49A | 0.1   | 2.52  |
| SNORD49B | 0.1   | 63.18 |
| SNORD4A  | 0.1   | 0.84  |
| SNORD4B  | 0.1   | 1.68  |
| SNORD5   | 0.1   | 0     |
| SNORD50A | 0.1   | 0.84  |
| SNORD51  | 0.1   | 0     |
| SNORD52  | 0.192 | 0     |
| SNORD53  | 0.503 | 13.73 |
| SNORD54  | 0.1   | 1.68  |
| SNORD55  | 0.1   | 3.37  |
| SNORD56  | 0.1   | 7.58  |
| SNORD57  | 0.1   | 0     |
| SNORD58A | 0.1   | 0.84  |
| SNORD59A | 0.1   | 1.68  |
| SNORD6   | 0.1   | 0     |
| SNORD60  | 0.453 | 33.29 |
| SNORD61  | 0.1   | 0     |
| SNORD62A | 4.127 | 17.57 |
| SNORD63  | 0.1   | 2.52  |
| SNORD64  | 0.1   | 0     |

|          |       |        |
|----------|-------|--------|
| SNORD68  | 0.1   | 9.26   |
| SNORD7   | 0.3   | 13.76  |
| SNORD72  | 0.1   | 0      |
| SNORD73A | 0.1   | 4.21   |
| SNORD73B | 0.1   | 0      |
| SNORD74  | 0.1   | 2.52   |
| SNORD8   | 0.109 | 0      |
| SNORD83A | 0.1   | 0      |
| SNORD83B | 0.1   | 5.06   |
| SNORD87  | 0.1   | 7.58   |
| SNORD9   | 0.103 | 0.82   |
| SNORD95  | 0.1   | 3.37   |
| SNORD96A | 0.1   | 0      |
| SNPH     | 4.994 | 0      |
| SNRK     | 5.119 | 5.69   |
| SNRP70   | 5.239 | 50.95  |
| SNRPA    | 1.606 | 69.34  |
| SNRPA1   | 1.059 | 7.96   |
| SNRPB    | 1.312 | 77.82  |
| SNRPB2   | 1.362 | 21.89  |
| SNRPC    | 0.71  | 66.33  |
| SNRPD1   | 1.6   | 37.33  |
| SNRPD2   | 1.159 | 138.75 |
| SNRPD3   | 1.385 | 53.88  |
| SNRPE    | 1.547 | 12.53  |
| SNRPEL1  | 0.279 | 6.64   |
| SNRPF    | 0.793 | 56.83  |
| SNRPF1   | 0.255 | 33.04  |
| SNRPG    | 0.58  | 25.56  |
| SNRPGP   | 0.388 | 0      |
| SNRPN    | 2.169 | 18.26  |
| SNTA1    | 2.34  | 1.62   |
| SNTB1    | 2.979 | 0.23   |
| SNTB2    | 1.7   | 0.7    |
| SNTG1    | 1.889 | 0      |
| SNTG2    | 1.412 | 0.54   |
| SNUPN    | 1.434 | 18.56  |
| SNURF    | 1.351 | 48.26  |
| SNW1     | 2.127 | 32.04  |
| SNX1     | 8.221 | 10.71  |
| SNX10    | 5.156 | 0.21   |
| SNX11    | 2.656 | 5.27   |
| SNX12    | 1.927 | 13.6   |
| SNX13    | 10.2  | 1.56   |
| SNX14    | 3.505 | 5.22   |
| SNX15    | 1.909 | 12.53  |
| SNX16    | 3.37  | 0.42   |
| SNX17    | 2.043 | 59.2   |
| SNX19    | 6.049 | 10.09  |
| SNX2     | 2.069 | 93.19  |

|         |        |        |
|---------|--------|--------|
| SNX21   | 4.558  | 1.9    |
| SNX22   | 3.614  | 18.6   |
| SNX24   | 2.024  | 0.17   |
| SNX25   | 3.213  | 0.55   |
| SNX26   | 4.18   | 9.05   |
| SNX27   | 7.085  | 5.33   |
| SNX3    | 1.463  | 72.55  |
| SNX30   | 5.9    | 0.82   |
| SNX4    | 2.524  | 4.64   |
| SNX5    | 3.098  | 34.32  |
| SNX6    | 3.3    | 13.33  |
| SNX7    | 2.695  | 18.69  |
| SNX8    | 2.988  | 29.34  |
| SNX9    | 4.2    | 6.14   |
| SOAT1   | 3.393  | 3.77   |
| SOAT2   | 2.035  | 0      |
| SOCS1   | 1.216  | 15.03  |
| SOCS2   | 3.058  | 151.42 |
| SOCS2P1 | 0.902  | 0.09   |
| SOCS2P2 | 1.64   | 0      |
| SOCS3   | 2.734  | 4.71   |
| SOCS4   | 7.013  | 0.98   |
| SOCS5   | 4.662  | 2.02   |
| SOCS6   | 2.635  | 2.24   |
| SOCS7   | 2.153  | 0.93   |
| SOD1    | 0.966  | 145.71 |
| SOD2    | 1.795  | 13.47  |
| SOD3    | 1.984  | 0      |
| SOHLH1  | 1.987  | 0.17   |
| SOHLH2  | 2.108  | 0.2    |
| SOLH    | 4.744  | 18.5   |
| SON     | 9.673  | 28.96  |
| SONP1   | 2.49   | 9.57   |
| SORBS1  | 8.027  | 0.65   |
| SORBS2  | 6.818  | 0      |
| SORBS3  | 4.199  | 38.23  |
| SORCS1  | 11.056 | 0      |
| SORCS2  | 5.955  | 0.02   |
| SORCS3  | 5.757  | 0      |
| SORD    | 2.515  | 10.85  |
| SORL1   | 7.957  | 4.55   |
| SORT1   | 7.018  | 23.38  |
| SOS1    | 4.326  | 4.34   |
| SOS2    | 3.999  | 5.54   |
| SOST    | 2.3    | 0      |
| SOSTDC1 | 3.738  | 0      |
| SOX1    | 4.108  | 0      |
| SOX10   | 2.862  | 0      |
| SOX11   | 8.719  | 0      |
| SOX12   | 4.63   | 19.03  |



|         |        |       |
|---------|--------|-------|
| SOX13   | 4.073  | 0.1   |
| SOX14   | 0.818  | 0     |
| SOX15   | 1.394  | 0.31  |
| SOX17   | 1.825  | 0     |
| SOX18   | 1.705  | 0.14  |
| SOX2    | 2.503  | 0     |
| SOX21   | 2.514  | 0     |
| SOX20T  | 3.042  | 0.03  |
| SOX3    | 2.074  | 0     |
| SOX30   | 4.308  | 0     |
| SOX4    | 4.879  | 26.86 |
| SOX5    | 4.946  | 0     |
| SOX5P   | 1.45   | 0     |
| SOX6    | 5.937  | 0.07  |
| SOX7    | 3.216  | 0.39  |
| SOX8    | 3.049  | 0.03  |
| SOX9    | 3.935  | 0     |
| SP1     | 7.661  | 14.13 |
| SP100   | 3.558  | 7.22  |
| SP110   | 2.683  | 9.23  |
| SP140   | 3.567  | 2.93  |
| SP2     | 2.968  | 13.91 |
| SP3     | 5.79   | 7.45  |
| SP4     | 11.622 | 0.4   |
| SP5     | 1.942  | 0     |
| SP6     | 3.794  | 0.07  |
| SP7     | 2.974  | 0.06  |
| SP8     | 10.682 | 0     |
| SPA17   | 0.94   | 0.54  |
| SPA17P1 | 0.689  | 0.12  |
| SPACA1  | 1.499  | 0     |
| SPACA3  | 0.819  | 0     |
| SPACA4  | 0.972  | 0.08  |
| SPACA5  | 0.732  | 0     |
| SPACA5B | 0.732  | 0     |
| SPAG1   | 3.936  | 0.03  |
| SPAG11  | 1.761  | 0     |
| SPAG11A | 2.182  | 0     |
| SPAG16  | 2.933  | 0.37  |
| SPAG17  | 7.111  | 0.03  |
| SPAG4   | 1.452  | 0.35  |
| SPAG4L  | 1.252  | 0     |
| SPAG5   | 3.808  | 8.18  |
| SPAG6   | 3.586  | 0     |
| SPAG7   | 1.001  | 30.97 |
| SPAG8   | 2.332  | 0.54  |
| SPAG9   | 5.877  | 3.09  |
| SPAM1   | 6.062  | 0.03  |
| SPANXA1 | 0.384  | 0     |
| SPANXA2 | 0.63   | 0     |

|          |        |       |
|----------|--------|-------|
| SPANXB1  | 0.469  | 0     |
| SPANXC   | 0.404  | 0     |
| SPANXD   | 0.384  | 0     |
| SPANXE   | 0.441  | 0     |
| SPANXN1  | 1.276  | 0     |
| SPANXN2  | 1.377  | 0     |
| SPANXN3  | 0.594  | 0     |
| SPANXN4  | 0.3    | 0     |
| SPANXN5  | 1.316  | 0     |
| SPARC    | 3.141  | 29.02 |
| SPARCL1  | 2.756  | 0.09  |
| SPAST    | 5.213  | 1.65  |
| SPATA1   | 1.509  | 0.17  |
| SPATA12  | 2.413  | 0     |
| SPATA13  | 3.503  | 1.42  |
| SPATA16  | 2.05   | 0     |
| SPATA17  | 1.235  | 0     |
| SPATA18  | 4.3    | 0     |
| SPATA19  | 0.866  | 0     |
| SPATA2   | 4.045  | 2.86  |
| SPATA20  | 2.607  | 8.89  |
| SPATA21  | 2.528  | 22.02 |
| SPATA22  | 1.457  | 0     |
| SPATA2L  | 2.317  | 2.11  |
| SPATA3   | 1.618  | 0     |
| SPATA4   | 1.233  | 0     |
| SPATA5   | 3.341  | 1.06  |
| SPATA5L1 | 2.509  | 1.81  |
| SPATA6   | 1.739  | 0     |
| SPATA7   | 1.993  | 1.31  |
| SPATA8   | 1.026  | 0     |
| SPATA9   | 1.82   | 0.09  |
| SPATC1   | 2.011  | 0.13  |
| SPATS1   | 1.354  | 0     |
| SPATS2   | 2.993  | 7.01  |
| SPC24    | 2.289  | 11.55 |
| SPC25    | 1.346  | 3.26  |
| SPCS1    | 1.096  | 67.56 |
| SPCS2    | 1.37   | 23.8  |
| SPCS3    | 2.234  | 8.22  |
| SPDEF    | 1.894  | 0     |
| SPDYA    | 2.438  | 0.03  |
| SPDYC    | 0.882  | 0     |
| SPECC1   | 4.706  | 4.19  |
| SPECC1L  | 6.211  | 8.15  |
| SPEG     | 0.519  | 0     |
| SPEN     | 12.227 | 8.8   |
| SPERT    | 1.613  | 0     |
| SPESP1   | 1.403  | 0.12  |
| SPG20    | 4.822  | 5.24  |

|          |       |        |
|----------|-------|--------|
| SPG21    | 1.798 | 30.12  |
| SPG3A    | 2.245 | 0.75   |
| SPG7     | 4.039 | 13.89  |
| SPHAR    | 0.968 | 0.17   |
| SPHK1    | 2.997 | 12.14  |
| SPHK2    | 2.963 | 7.88   |
| SPI1     | 1.373 | 88.72  |
| SPIB     | 1.448 | 3.43   |
| SPIC     | 0.999 | 0      |
| SPIN1    | 3.473 | 25.32  |
| SPIN2A   | 1.319 | 0.7    |
| SPIN2B   | 1.518 | 2.72   |
| SPIN3    | 1.642 | 0      |
| SPINK1   | 0.438 | 0      |
| SPINK2   | 0.591 | 0.29   |
| SPINK4   | 0.368 | 0.46   |
| SPINK5   | 3.61  | 0      |
| SPINK5L2 | 0.294 | 0      |
| SPINK5L3 | 0.285 | 0      |
| SPINK6   | 0.686 | 0      |
| SPINK7   | 0.55  | 0      |
| SPINK8   | 0.44  | 0      |
| SPINK9   | 0.453 | 0      |
| SPINLW1  | 2.691 | 0      |
| SPINT1   | 2.755 | 0.34   |
| SPINT2   | 1.695 | 103.96 |
| SPINT4   | 0.514 | 0      |
| SPIRE1   | 5.402 | 0.11   |
| SPIRE2   | 3.244 | 0.15   |
| SPN      | 6.973 | 18.88  |
| SPO11    | 1.817 | 0      |
| SPOCD1   | 3.888 | 0      |
| SPOCK1   | 4.827 | 0      |
| SPOCK2   | 5.305 | 49.71  |
| SPOCK3   | 2.989 | 0      |
| SPON1    | 4.754 | 0.25   |
| SPON2    | 1.802 | 2.15   |
| SPOP     | 3.141 | 16.44  |
| SPP1     | 1.625 | 0.1    |
| SPP2     | 1.019 | 0      |
| SPPL2A   | 1.929 | 4.89   |
| SPPL2B   | 3.641 | 33.46  |
| SPR      | 1.42  | 3.86   |
| SPRED1   | 3.816 | 2.85   |
| SPRED2   | 4.097 | 9.75   |
| SPRED3   | 0.543 | 0      |
| SPRN     | 3.219 | 1.46   |
| SPRR1A   | 0.648 | 0      |
| SPRR1B   | 0.619 | 0      |
| SPRR2A   | 0.677 | 0      |

|          |        |       |
|----------|--------|-------|
| SPRR2B   | 0.662  | 0     |
| SPRR2D   | 0.79   | 0     |
| SPRR2E   | 0.678  | 0     |
| SPRR2F   | 0.657  | 0     |
| SPRR2G   | 0.56   | 0     |
| SPRR3    | 0.984  | 0     |
| SPRR4    | 0.766  | 0.11  |
| SPRY1    | 3.819  | 3.84  |
| SPRY2    | 2.111  | 20.75 |
| SPRY3    | 18.076 | 0.09  |
| SPRY4    | 4.925  | 11.44 |
| SPRYD3   | 2.568  | 9.91  |
| SPRYD4   | 1.077  | 11.11 |
| SPRYD5   | 1.269  | 0     |
| SPSB1    | 3.075  | 13.15 |
| SPSB2    | 1.188  | 5.6   |
| SPSB3    | 1.544  | 26.35 |
| SPSB4    | 2.418  | 7.04  |
| SPTA1    | 7.999  | 3.35  |
| SPTAN1   | 7.771  | 62.31 |
| SPTB     | 10.436 | 1.1   |
| SPTBN1   | 9.256  | 45.68 |
| SPTBN2   | 7.864  | 0.08  |
| SPTBN4   | 9.919  | 0.01  |
| SPTBN5   | 11.722 | 0.09  |
| SPTLC1   | 3.283  | 8.85  |
| SPTLC2   | 8.065  | 25.69 |
| SPTLC3   | 2.26   | 0     |
| SPTY2D1  | 5.734  | 1.75  |
| SPZ1     | 1.819  | 0     |
| SOLE     | 2.99   | 2.2   |
| SQRDL    | 1.672  | 1.91  |
| SQSTM1   | 2.848  | 34.93 |
| SR140    | 7.464  | 7.8   |
| SRA1     | 1.511  | 11.65 |
| SR-A1    | 4.193  | 29.23 |
| SRBD1    | 3.663  | 3.87  |
| SRC      | 4.201  | 2.73  |
| SRCAP    | 9.914  | 14.71 |
| SRCRB4D  | 5.612  | 0.43  |
| SRD5A1   | 2.264  | 1.19  |
| SRD5A2   | 2.445  | 0     |
| SRD5A2L  | 2.272  | 3.71  |
| SRD5A2L2 | 3.571  | 0     |
| SRD5AP1  | 2.158  | 0.12  |
| SREBF1   | 4.278  | 9.87  |
| SREBF2   | 5.226  | 23.53 |
| SRF      | 4.318  | 19.62 |
| SRFBP1   | 2.17   | 2.64  |
| SRGAP1   | 4.436  | 0     |

|         |        |        |
|---------|--------|--------|
| SRGAP2  | 7.009  | 9.5    |
| SRGAP3  | 14.332 | 0.2    |
| SRGN    | 1.254  | 83.57  |
| SRI     | 4.19   | 5.95   |
| SRIL    | 0.483  | 2.27   |
| SRL     | 5.587  | 0.47   |
| SRM     | 1.273  | 107.26 |
| SRMP1   | 0.885  | 2.28   |
| SRMP2   | 1.117  | 0      |
| SRMS    | 1.516  | 0      |
| SRP14   | 0.775  | 191.4  |
| SRP14P1 | 0.332  | 61.91  |
| SRP19   | 0.886  | 21.01  |
| SRP54   | 2.149  | 11.8   |
| SRP68   | 2.515  | 30.68  |
| SRP72   | 3.848  | 20.67  |
| SRP9    | 1.476  | 31.56  |
| SRPK1   | 4.361  | 6.84   |
| SRPK2   | 8.019  | 4.12   |
| SRPK3   | 1.948  | 0.21   |
| SRPR    | 2.946  | 57.07  |
| SRPRB   | 2.137  | 19.67  |
| SRPX    | 1.853  | 0      |
| SRPX2   | 2.132  | 0      |
| SRR     | 2.477  | 6.19   |
| SRRM1   | 3.923  | 22.31  |
| SRRM2   | 9.027  | 86.24  |
| SRrp35  | 0.995  | 0      |
| SRXN1   | 2.574  | 0.55   |
| SRY     | 0.897  | 0.37   |
| SS18    | 3.436  | 8.97   |
| SS18L1  | 7.038  | 1.24   |
| SS18L2  | 0.818  | 16.99  |
| SSB     | 1.643  | 35.89  |
| SSBP1   | 1.256  | 27.36  |
| SSBP2   | 2.168  | 29.6   |
| SSBP3   | 5.025  | 12.15  |
| SSBP4   | 2.033  | 8.53   |
| SSFA2   | 4.961  | 3.03   |
| SSH1    | 5.277  | 2.89   |
| SSH2    | 9.166  | 10.75  |
| SSH3    | 3.967  | 1.04   |
| SSNA1   | 0.858  | 62.74  |
| SSPN    | 2.695  | 0.47   |
| SSPO    | 12.25  | 0.2    |
| SSR1    | 4.033  | 29.34  |
| SSR2    | 1.092  | 182.13 |
| SSR3    | 3.064  | 17.68  |
| SSR4    | 0.637  | 261.96 |
| SSRP1   | 2.819  | 64.48  |

|            |       |       |
|------------|-------|-------|
| SSSCA1     | 0.654 | 27.69 |
| SST        | 0.632 | 0     |
| SSTR1      | 4.291 | 0.08  |
| SSTR2      | 2.996 | 0     |
| SSTR3      | 2.123 | 0     |
| SSTR4      | 1.167 | 0     |
| SSTR5      | 1.095 | 0     |
| SSU72      | 2.403 | 44.87 |
| SSX1       | 1.253 | 0     |
| SSX2       | 1.553 | 0     |
| SSX2IP     | 5.631 | 0.22  |
| SSX3       | 1.513 | 0.06  |
| SSX4       | 1.91  | 0     |
| SSX4B      | 1.902 | 0     |
| SSX5       | 1.384 | 0     |
| SSX6       | 1.281 | 0     |
| SSX7       | 1.34  | 0     |
| SSX8       | 1.254 | 0     |
| SSX9       | 1.23  | 0     |
| ST13       | 3.196 | 15.89 |
| ST13P      | 1.73  | 0     |
| ST14       | 3.3   | 14.27 |
| ST18       | 6.187 | 0     |
| ST3GAL1    | 6.415 | 13.39 |
| ST3GAL2    | 2.479 | 5.85  |
| ST3GAL3    | 3.909 | 14.83 |
| ST3GAL4    | 1.743 | 4.59  |
| ST3GAL5    | 2.362 | 9.98  |
| ST3GAL6    | 2.095 | 0.08  |
| ST5        | 4.705 | 3.06  |
| ST6GAL1    | 4.629 | 14.87 |
| ST6GAL2    | 1.794 | 0     |
| ST6GALNAC1 | 2.544 | 0.03  |
| ST6GALNAC2 | 2.04  | 2.85  |
| ST6GALNAC3 | 3.207 | 0.05  |
| ST6GALNAC4 | 2.104 | 18.7  |
| ST6GALNAC5 | 2.032 | 0     |
| ST6GALNAC6 | 2.398 | 30.28 |
| ST7        | 6.322 | 1.4   |
| ST7L       | 4.861 | 3.02  |
| ST7OT1     | 3.778 | 1.51  |
| ST7OT2     | 1.836 | 0.27  |
| ST7OT4     | 3.148 | 0.08  |
| ST8SIA1    | 2.106 | 0     |
| ST8SIA2    | 5.626 | 0     |
| ST8SIA3    | 3.504 | 0     |
| ST8SIA4    | 7.328 | 2.04  |
| ST8SIA5    | 2.623 | 0.54  |
| ST8SIA6    | 1.398 | 0.06  |
| STAB1      | 7.926 | 74.67 |

|          |        |       |
|----------|--------|-------|
| STAB2    | 8.23   | 0     |
| STAC     | 2.963  | 0     |
| STAC2    | 3.211  | 0     |
| STAC3    | 1.643  | 2.67  |
| STAG1    | 5.505  | 4.28  |
| STAG2    | 5.925  | 14.91 |
| STAG3    | 8.41   | 24.8  |
| STAM     | 2.966  | 6.85  |
| STAM2    | 3.91   | 2.67  |
| STAMBP   | 2.618  | 9.53  |
| STAMBPL1 | 1.997  | 1.27  |
| STAP2    | 1.612  | 12.38 |
| STAR     | 2.826  | 0.15  |
| STARD10  | 1.419  | 5.23  |
| STARD13  | 6.771  | 0.87  |
| STARD3   | 2.285  | 34.76 |
| STARD3NL | 3.234  | 5.94  |
| STARD4   | 2.264  | 0.78  |
| STARD5   | 2.187  | 1.73  |
| STARD6   | 0.663  | 0     |
| STARD7   | 3.776  | 48.03 |
| STARD8   | 4.858  | 3.92  |
| STARD9   | 15.083 | 0.74  |
| STARP1   | 1.104  | 0     |
| STAT1    | 4.504  | 8.68  |
| STAT2    | 4.426  | 15.55 |
| STAT3    | 7.832  | 11.96 |
| STAT4    | 2.761  | 0.12  |
| STAT5A   | 4.298  | 10.78 |
| STAT5B   | 5.094  | 11.66 |
| STAT6    | 3.979  | 68.11 |
| STATH    | 0.6    | 0     |
| STATIP1  | 2.757  | 12.68 |
| STAU1    | 4.177  | 15.23 |
| STAU2    | 4.042  | 2.54  |
| STC1     | 3.877  | 0     |
| STC2     | 5.343  | 8.04  |
| STCH     | 3.987  | 2.57  |
| STEAP1   | 2.626  | 0.13  |
| STEAP2   | 13.714 | 0     |
| STEAP3   | 4.853  | 0.42  |
| STEAP4   | 4.88   | 0.02  |
| STELLAR  | 1.219  | 0     |
| STGC3    | 1.232  | 0     |
| STH      | 0.387  | 0     |
| STIL     | 5.185  | 2.01  |
| STIM1    | 4.037  | 24.14 |
| STIM2    | 5.339  | 10.57 |
| STIP1    | 2.111  | 93.69 |
| STK10    | 4.801  | 31.2  |

|         |       |        |
|---------|-------|--------|
| STK11   | 3.276 | 25.04  |
| STK11IP | 3.602 | 9.57   |
| STK16   | 1.718 | 19.57  |
| STK16P  | 1.55  | 0.22   |
| STK17A  | 5.286 | 5.18   |
| STK17B  | 2.141 | 15.26  |
| STK19   | 5.184 | 0      |
| STK19P  | 0.915 | 0      |
| STK24   | 3.855 | 42.2   |
| STK25   | 2.468 | 31.88  |
| STK3    | 2.82  | 3.73   |
| STK31   | 7.728 | 0      |
| STK32A  | 0.798 | 0      |
| STK32B  | 4.014 | 35.7   |
| STK32C  | 2.119 | 0.31   |
| STK33   | 2.707 | 1.06   |
| STK35   | 6.015 | 2.27   |
| STK36   | 4.873 | 3.37   |
| STK38   | 3.576 | 21.32  |
| STK38L  | 4.706 | 1.88   |
| STK39   | 3.273 | 10.68  |
| STK4    | 6.331 | 5.99   |
| STK40   | 3.846 | 22.47  |
| STK6LP  | 1.198 | 0.28   |
| STK6P   | 1.537 | 0.77   |
| STMN1   | 1.918 | 110.72 |
| STMN2   | 0.719 | 0      |
| STMN3   | 2.255 | 32.2   |
| STMN4   | 1.314 | 0      |
| STOM    | 5.199 | 23.57  |
| STOML1  | 1.986 | 3.56   |
| STOML2  | 1.278 | 27.69  |
| STOML3  | 1.901 | 0      |
| STON1   | 5.822 | 0      |
| STON2   | 3.197 | 1.58   |
| STOX1   | 3.293 | 0.15   |
| STOX2   | 4.654 | 0      |
| STRA13  | 0.73  | 30.69  |
| STRA6   | 2.772 | 0.09   |
| STRA8   | 1.986 | 0      |
| STRAP   | 1.849 | 44.24  |
| STRBP   | 3.007 | 31.91  |
| STRC    | 5.515 | 0.03   |
| STRN    | 3.669 | 3.21   |
| STRN3   | 3.947 | 3.09   |
| STRN4   | 3.305 | 31.35  |
| STS     | 6.352 | 4.7    |
| STS-1   | 6.865 | 28.23  |
| STSP    | 0.775 | 0      |
| STT3A   | 2.463 | 62.89  |



|         |       |       |
|---------|-------|-------|
| STT3B   | 3.487 | 35.49 |
| STUB1   | 1.602 | 36.28 |
| STX10   | 1.085 | 33.85 |
| STX11   | 1.916 | 0.48  |
| STX12   | 2.847 | 5.06  |
| STX16   | 5.029 | 16.47 |
| STX17   | 2.662 | 6.08  |
| STX18   | 2.158 | 9.64  |
| STX19   | 1.158 | 0     |
| STX1A   | 4.13  | 0.02  |
| STX1B2  | 1.699 | 0.05  |
| STX2    | 5.835 | 0.88  |
| STX3    | 2.942 | 36.93 |
| STX4    | 1.386 | 30.27 |
| STX5    | 1.794 | 31.27 |
| STX6    | 4.536 | 4.4   |
| STX7    | 2.579 | 10.84 |
| STX8    | 0.968 | 23.41 |
| STXBP1  | 5.826 | 3.73  |
| STXBP2  | 1.818 | 25.62 |
| STXBP3  | 2.48  | 4.96  |
| STXBP4  | 6.046 | 0.18  |
| STXBP5  | 4.822 | 0.07  |
| STXBP5L | 5.179 | 0.03  |
| STXBP6  | 1.97  | 0     |
| STYK1   | 2.743 | 0.99  |
| STYX    | 2.591 | 1.76  |
| STYXL1  | 3.37  | 10.6  |
| SUB1    | 1.313 | 31.5  |
| SUCLA2  | 2.164 | 5.84  |
| SUCLG1  | 1.227 | 47.92 |
| SUCLG2  | 2.319 | 13.3  |
| SUCNR1  | 1.418 | 0.06  |
| SUDS3   | 4.728 | 10.08 |
| SUFU    | 4.898 | 9.07  |
| SUGT1   | 1.52  | 9.75  |
| SUGT1L1 | 0.519 | 1.3   |
| SUHW1   | 2.148 | 0.04  |
| SUHW2   | 5.733 | 0.68  |
| SUHW3   | 4.634 | 0.56  |
| SUHW4   | 6.373 | 3.54  |
| SULF1   | 5.7   | 0     |
| SULF2   | 3.897 | 7.95  |
| SULT1A1 | 2.715 | 1.67  |
| SULT1A2 | 1.396 | 0.3   |
| SULT1A3 | 1.755 | 3.65  |
| SULT1A4 | 1.82  | 3.52  |
| SULT1B1 | 1.309 | 0     |
| SULT1C1 | 2.926 | 0     |
| SULT1C2 | 1.664 | 0.05  |

|          |        |        |
|----------|--------|--------|
| SULT1C3  | 0.915  | 0      |
| SULT1D1P | 22     | 0      |
| SULT1E1  | 1.78   | 0      |
| SULT2A1  | 1.779  | 0      |
| SULT2B1  | 1.548  | 0.05   |
| SULT4A1  | 2.465  | 0      |
| SULT6B1  | 0.934  | 0      |
| SUMF1    | 2.148  | 4.59   |
| SUMF2    | 4.01   | 32.6   |
| SUMO1    | 2.151  | 16.01  |
| SUMO1P1  | 1.197  | 0      |
| SUMO1P2  | 0.944  | 0.18   |
| SUMO1P3  | 1.21   | 5.15   |
| SUMO1P4  | 1.458  | 1.68   |
| SUMO2    | 1.066  | 43.3   |
| SUMO2P   | 3.075  | 0      |
| SUMO3    | 1.807  | 50.07  |
| SUMO4    | 0.688  | 0.25   |
| SUNC1    | 3.068  | 0      |
| SUOX     | 2.462  | 10.03  |
| SUPT16H  | 4.68   | 21.98  |
| SUPT3H   | 2.563  | 6.14   |
| SUPT4H1  | 3.395  | 35.16  |
| SUPT5H   | 3.742  | 51.12  |
| SUPT6H   | 5.877  | 23.67  |
| SUPT7L   | 4.261  | 10.83  |
| SUPV3L1  | 2.474  | 7.9    |
| SURB7    | 1.753  | 2.88   |
| SURF1    | 1.037  | 22.91  |
| SURF2    | 0.831  | 17.54  |
| SURF4    | 2.969  | 49.99  |
| SURF5    | 4.882  | 5.74   |
| SURF6    | 2.314  | 14.41  |
| SUSD1    | 2.996  | 4.7    |
| SUSD2    | 3.183  | 0.08   |
| SUSD3    | 1.19   | 227.44 |
| SUSD4    | 3.343  | 0.05   |
| SUSD5    | 5.149  | 0      |
| SUV39H1  | 2.726  | 9.36   |
| SUV39H2  | 3.087  | 1.39   |
| SUV420H1 | 6.35   | 5.03   |
| SUV420H2 | 2.266  | 3.79   |
| SUZ12    | 4.441  | 7.51   |
| SUZ12P   | 38.28  | 0.27   |
| SV2A     | 4.363  | 19.72  |
| SV2B     | 5.311  | 3.5    |
| SV2C     | 2.362  | 0.18   |
| SVEP1    | 10.707 | 0.03   |
| SVIL     | 8.547  | 1.26   |
| SVOP     | 2.532  | 0      |

|         |        |       |
|---------|--------|-------|
| SVOPL   | 2.842  | 0     |
| SWAP70  | 4.848  | 6.14  |
| SYAP1   | 2.023  | 6.7   |
| SYBL1   | 5.152  | 5.07  |
| SYCE1   | 2.682  | 0     |
| SYCN    | 1.105  | 0     |
| SYCP1   | 3.491  | 0     |
| SYCP2   | 5.48   | 0.03  |
| SYCP3   | 1.122  | 0.3   |
| SYDE1   | 3.254  | 8.41  |
| SYDE2   | 4.02   | 0     |
| SYF2    | 1.77   | 19.04 |
| SYF2P   | 0.439  | 0.76  |
| SYK     | 4.701  | 38.5  |
| SYMPK   | 3.985  | 24.44 |
| SYN1    | 4.271  | 0.22  |
| SYN2    | 5.085  | 0     |
| SYN3    | 4.19   | 0     |
| SYNC1   | 2.479  | 3.94  |
| SYNCRIP | 4.282  | 33.58 |
| SYNE1   | 29.529 | 0.72  |
| SYNE2   | 24.122 | 2.56  |
| SYNGAP1 | 6.01   | 4.1   |
| SYNGR1  | 5.557  | 16.6  |
| SYNGR2  | 1.694  | 32.57 |
| SYNGR3  | 2.029  | 0.04  |
| SYNGR4  | 1.009  | 0.08  |
| SYNJ1   | 10.147 | 0.76  |
| SYNJ2   | 6.738  | 2.36  |
| SYNJ2BP | 1.55   | 5.92  |
| SYNPO   | 3.524  | 0.76  |
| SYNPO2  | 7.295  | 0.03  |
| SYNPO2L | 3.47   | 0.05  |
| SYNPR   | 2.336  | 0     |
| SYP     | 2.433  | 0.52  |
| SYPL1   | 4.67   | 14.43 |
| SYPL2   | 1.665  | 0.05  |
| SYT1    | 3.225  | 1.59  |
| SYT10   | 3.286  | 0     |
| SYT11   | 5.096  | 5.08  |
| SYT12   | 3.432  | 0     |
| SYT13   | 5.08   | 0     |
| SYT14   | 2.966  | 0     |
| SYT15   | 5.122  | 0.41  |
| SYT16   | 1.878  | 0     |
| SYT17   | 1.912  | 0     |
| SYT2    | 2.434  | 0     |
| SYT3    | 2.915  | 0.41  |
| SYT4    | 3.825  | 0     |
| SYT5    | 1.825  | 0     |

|         |        |        |
|---------|--------|--------|
| SYT6    | 1.897  | 0      |
| SYT7    | 4.532  | 0.02   |
| SYT8    | 1.423  | 0      |
| SYT9    | 3.955  | 0      |
| SYTL1   | 1.898  | 22.37  |
| SYTL2   | 7.493  | 0.06   |
| SYTL3   | 2.223  | 0.34   |
| SYTL4   | 3.885  | 0.08   |
| SYTL5   | 2.193  | 0      |
| SYVN1   | 3.222  | 39.27  |
| T       | 2.518  | 0      |
| TAAR1   | 1.02   | 0      |
| TAAR2   | 1.056  | 0      |
| TAAR3   | 1.114  | 0      |
| TAAR4P  | 1.049  | 0      |
| TAAR5   | 1.014  | 0      |
| TAAR6   | 1.038  | 0      |
| TAAR7P  | 0.21   | 0      |
| TAAR8   | 1.029  | 0      |
| TAAR9   | 1.049  | 0      |
| TAC1    | 2.168  | 0      |
| TAC3    | 1.008  | 0.17   |
| TAC4    | 0.225  | 0.37   |
| TACC1   | 7.743  | 7.8    |
| TACC2   | 10.096 | 0.88   |
| TACC3   | 2.783  | 30.51  |
| TACR1   | 2.301  | 0      |
| TACR2   | 1.197  | 0.07   |
| TACR3   | 1.753  | 0      |
| TACSTD1 | 1.528  | 0.05   |
| TACSTD2 | 2.803  | 0.39   |
| TADA1L  | 2.074  | 3.78   |
| TADA2L  | 2.063  | 3.19   |
| TADA3L  | 3.323  | 18.23  |
| TAF1    | 6.404  | 5.46   |
| TAF10   | 0.762  | 133.31 |
| TAF11   | 1.533  | 11.86  |
| TAF12   | 1.09   | 21.71  |
| TAF13   | 0.577  | 2.77   |
| TAF13P  | 0.294  | 0      |
| TAF15   | 2.518  | 159.94 |
| TAF1A   | 2.116  | 0.56   |
| TAF1B   | 2.297  | 2.31   |
| TAF1C   | 4.425  | 9.08   |
| TAF1L   | 6.216  | 1.22   |
| TAF2    | 5.019  | 2.7    |
| TAF2GL  | 0.753  | 0.22   |
| TAF3    | 7.355  | 2.86   |
| TAF4    | 4.628  | 7.5    |
| TAF4B   | 4.772  | 2.33   |

|          |        |        |
|----------|--------|--------|
| TAF5     | 3.268  | 2.44   |
| TAF5L    | 6.848  | 3.27   |
| TAF6     | 6.672  | 8.29   |
| TAF6L    | 2.016  | 8.48   |
| TAF7     | 2.295  | 85.56  |
| TAF7L    | 2.341  | 0      |
| TAF9     | 5.584  | 5.96   |
| TAF9B    | 2.689  | 4.79   |
| TAF9P1   | 1.38   | 0      |
| TAF9P2   | 1.216  | 0      |
| TAGAP    | 3.956  | 27.66  |
| TAGLN    | 1.666  | 1.72   |
| TAGLN2   | 1.36   | 179.75 |
| TAGLN3   | 1.754  | 0      |
| tAKR     | 0.918  | 1.56   |
| TAL1     | 5.001  | 0.5    |
| TAL2     | 0.327  | 0.25   |
| TALDO1   | 1.243  | 106.46 |
| TANC1    | 7.507  | 0.37   |
| TANC2    | 11.577 | 0.03   |
| TA-NFKBH | 1.834  | 1.24   |
| TANK     | 2.394  | 4.44   |
| TAOK1    | 4.816  | 1.94   |
| TAOK2    | 6.759  | 9.01   |
| TAOK3    | 4.185  | 12.8   |
| TAP1     | 8.856  | 0.94   |
| TAP2     | 18.495 | 0.05   |
| TAPBP    | 17.132 | 0      |
| TAPBPL   | 1.718  | 22.6   |
| TAPT1    | 3.682  | 11.64  |
| TARBP1   | 5.13   | 6.73   |
| TARBP2   | 2.244  | 11.9   |
| TARBP2P  | 1.049  | 1.21   |
| TARDBP   | 4.217  | 26.44  |
| TARP     | 3.89   | 2.34   |
| TARS     | 2.85   | 21.46  |
| TARS2    | 2.38   | 10.76  |
| TARSL2   | 3.294  | 3.86   |
| TAS1R1   | 4.266  | 0      |
| TAS1R2   | 2.521  | 0      |
| TAS1R3   | 2.559  | 0.43   |
| TAS2R1   | 1.355  | 0      |
| TAS2R10  | 0.924  | 0.18   |
| TAS2R12  | 0.948  | 0.18   |
| TAS2R13  | 1.637  | 0      |
| TAS2R14  | 0.954  | 0.36   |
| TAS2R15  | 0.903  | 0.09   |
| TAS2R16  | 1.992  | 0      |
| TAS2R2   | 1.82   | 0      |
| TAS2R3   | 2.202  | 0      |

|          |       |       |
|----------|-------|-------|
| TAS2R38  | 2.286 | 0.3   |
| TAS2R39  | 2.028 | 0     |
| TAS2R4   | 1.8   | 0.09  |
| TAS2R40  | 1.944 | 0     |
| TAS2R41  | 1.844 | 0     |
| TAS2R42  | 1.964 | 12.05 |
| TAS2R43  | 0.928 | 0     |
| TAS2R44  | 0.928 | 0.09  |
| TAS2R46  | 0.899 | 0.09  |
| TAS2R48  | 0.9   | 0.19  |
| TAS2R49  | 0.93  | 0.09  |
| TAS2R5   | 2.3   | 0.11  |
| TAS2R50  | 0.9   | 0     |
| TAS2R60  | 1.914 | 0     |
| TAS2R62P | 1.878 | 0     |
| TAS2R63P | 0.885 | 0     |
| TAS2R64P | 0.93  | 0     |
| TAS2R65P | 0.919 | 0     |
| TAS2R7   | 1.096 | 0     |
| TAS2R8   | 0.93  | 0     |
| TAS2R9   | 1.075 | 0     |
| TASP1    | 2.315 | 2.54  |
| TAT      | 2.754 | 0     |
| TATDN1   | 1.004 | 3.1   |
| TATDN2   | 4.484 | 13.85 |
| TATDN3   | 3.066 | 1.98  |
| TAX1BP1  | 5.78  | 9.82  |
| TAX1BP3  | 1.381 | 34.28 |
| TAZ      | 2.881 | 10.06 |
| TBC1D1   | 5.923 | 27.25 |
| TBC1D10A | 1.936 | 12.01 |
| TBC1D10B | 2.984 | 33.79 |
| TBC1D10C | 2.163 | 53.04 |
| TBC1D12  | 5.843 | 0     |
| TBC1D13  | 3.778 | 12.15 |
| TBC1D14  | 4.925 | 34.22 |
| TBC1D15  | 3.212 | 6.56  |
| TBC1D16  | 8.455 | 18.06 |
| TBC1D17  | 2.219 | 18.64 |
| TBC1D19  | 1.924 | 1.32  |
| TBC1D2   | 3.191 | 0.21  |
| TBC1D20  | 2.539 | 10.02 |
| TBC1D21  | 1.207 | 0     |
| TBC1D22A | 2.545 | 13.8  |
| TBC1D22B | 3.462 | 12.14 |
| TBC1D23  | 2.065 | 2.61  |
| TBC1D24  | 4.317 | 1.39  |
| TBC1D25  | 4.164 | 4.33  |
| TBC1D2B  | 5.877 | 3.07  |
| TBC1D3   | 2.063 | 0.08  |

|          |        |       |
|----------|--------|-------|
| TBC1D3B  | 2.063  | 0     |
| TBC1D3C  | 2.11   | 0     |
| TBC1D3G  | 2.108  | 0     |
| TBC1D3I  | 1.964  | 0     |
| TBC1D3P1 | 9.376  | 0     |
| TBC1D3P2 | 10.497 | 0     |
| TBC1D4   | 5.922  | 5.63  |
| TBC1D5   | 7.673  | 11.55 |
| TBC1D7   | 1.127  | 6.73  |
| TBC1D8   | 4.271  | 3.33  |
| TBC1D8B  | 6.302  | 0.34  |
| TBC1D9   | 5.474  | 6.59  |
| TBC1D9B  | 5.167  | 30.09 |
| TBCA     | 0.679  | 86.96 |
| TBCAP1   | 0.557  | 38.11 |
| TBCAP2   | 0.468  | 2.7   |
| TBCAP3   | 0.432  | 0     |
| TBCB     | 1.475  | 42.2  |
| TBCC     | 1.575  | 12.3  |
| TBCCD1   | 2.41   | 4.76  |
| TBCD     | 5.343  | 17.86 |
| TBCE     | 1.867  | 7.58  |
| TBCEL    | 1.781  | 0.99  |
| TBK1     | 2.982  | 3.03  |
| TBKBP1   | 4.121  | 66.5  |
| TBL1X    | 5.866  | 5.53  |
| TBL1XR1  | 5.911  | 5.57  |
| TBL1Y    | 2.407  | 0.14  |
| TBL1YP   | 15.647 | 0     |
| TBL2     | 6.082  | 3.66  |
| TBL3     | 2.594  | 13.61 |
| TBN      | 2.834  | 18.52 |
| TBP      | 1.846  | 6.99  |
| TBPL1    | 1.319  | 5.3   |
| TBPL2    | 1.297  | 0     |
| TBR1     | 3.186  | 0     |
| TBRG1    | 3.404  | 5.35  |
| TBRG4    | 4.604  | 9.71  |
| TBX1     | 2.809  | 0     |
| TBX10    | 1.548  | 0     |
| TBX15    | 3.495  | 0.05  |
| TBX18    | 4.07   | 0     |
| TBX19    | 2.822  | 1.76  |
| TBX2     | 3.38   | 0.03  |
| TBX20    | 1.81   | 0     |
| TBX21    | 2.572  | 43.14 |
| TBX22    | 2.248  | 0     |
| TBX3     | 4.783  | 0.02  |
| TBX4     | 2.47   | 0     |
| TBX5     | 4.673  | 0     |

|            |        |       |
|------------|--------|-------|
| TBX6       | 3.169  | 0.71  |
| TBXA2R     | 2.182  | 21.81 |
| TBXAS1     | 5.079  | 4.43  |
| tcag7.1017 | 5.928  | 0.23  |
| tcag7.1196 | 1.662  | 15.51 |
| tcag7.1239 | 0.393  | 15    |
| tcag7.350  | 1.23   | 0.68  |
| tcag7.441  | 1.699  | 0.05  |
| tcag7.875  | 1.02   | 0     |
| tcag7.926  | 2.202  | 0.5   |
| TCAM1      | 10.651 | 0.08  |
| TCAP       | 0.963  | 4.72  |
| TCBA1      | 3.315  | 0     |
| TCEA1      | 2.777  | 12.62 |
| TCEA1P     | 2.472  | 0     |
| TCEA1P2    | 2.57   | 17.73 |
| TCEA2      | 2.425  | 5.69  |
| TCEA3      | 1.586  | 0     |
| TCEAL1     | 1.353  | 5.04  |
| TCEAL2     | 1.101  | 0.08  |
| TCEAL3     | 1.278  | 14.7  |
| TCEAL4     | 1.503  | 51.9  |
| TCEAL5     | 1.168  | 0.14  |
| TCEAL6     | 0.998  | 0.76  |
| TCEAL7     | 1.136  | 0     |
| TCEAL8     | 1.212  | 23.28 |
| TCEB1      | 0.655  | 18.52 |
| TCEB1P     | 1.83   | 3.54  |
| TCEB1P2    | 0.7    | 4.57  |
| TCEB2      | 1.29   | 60.93 |
| TCEB3      | 2.992  | 12.89 |
| TCEB3B     | 3.046  | 0     |
| TCEB3C     | 1.877  | 0     |
| TCERG1     | 4.201  | 9.53  |
| TCERG1L    | 2.619  | 0     |
| TCF1       | 3.239  | 0.26  |
| TCF12      | 4.934  | 13.98 |
| TCF15      | 1.227  | 0.07  |
| TCF19      | 3.246  | 0.1   |
| TCF2       | 6.029  | 0     |
| TCF20      | 14.785 | 3.51  |
| TCF21      | 3.645  | 0     |
| TCF23      | 0.645  | 0     |
| TCF25      | 2.221  | 40.24 |
| TCF3       | 4.674  | 84.31 |
| TCF4       | 5.848  | 40.75 |
| TCF7       | 6.201  | 1.77  |
| TCF7L1     | 2.761  | 0.15  |
| TCF7L2     | 2.627  | 8.91  |
| TCFL5      | 2.773  | 13.46 |



|          |        |        |
|----------|--------|--------|
| TCHHL1   | 3.603  | 0      |
| TCHP     | 3.151  | 9.76   |
| TCIRG1   | 3.282  | 34.59  |
| TCL1A    | 1.311  | 841.78 |
| TCL1B    | 2.453  | 270.8  |
| TCL6     | 10.298 | 3.9    |
| TCN1     | 1.543  | 3.17   |
| TCN2     | 1.981  | 2.93   |
| TCOF1    | 5.956  | 12.36  |
| TCP1     | 2.863  | 58.02  |
| TCP10    | 2.383  | 0      |
| TCP10L   | 0.957  | 0      |
| TCP10L2  | 1.543  | 0      |
| TCP11    | 1.962  | 0.56   |
| TCP11L1  | 2.405  | 2.13   |
| TCP11L2  | 2.219  | 2.05   |
| TCP1L2   | 2.01   | 0.13   |
| TCTA     | 2.146  | 29.12  |
| TCTE3    | 0.747  | 0.11   |
| TCTEX1D1 | 2.002  | 0.46   |
| TDG      | 3.22   | 5.36   |
| TDGF1    | 2.027  | 0      |
| TDGF3    | 2.71   | 0      |
| TDGF5    | 0.978  | 0.08   |
| TDH      | 30.173 | 0.01   |
| TDO2     | 1.693  | 0      |
| TDP1     | 3.747  | 5.37   |
| TDPX2    | 0.958  | 55.74  |
| TDRD1    | 4.51   | 0.11   |
| TDRD10   | 2.331  | 0      |
| TDRD3    | 2.461  | 4.42   |
| TDRD5    | 3.516  | 0      |
| TDRD6    | 6.817  | 0      |
| TDRD7    | 3.762  | 1.75   |
| TDRD9    | 3.338  | 0      |
| TDRKH    | 2.318  | 2.14   |
| TEAD1    | 9.697  | 0.89   |
| TEAD2    | 2.164  | 1.13   |
| TEAD3    | 2.915  | 0      |
| TEAD4    | 2.151  | 2.7    |
| TEC      | 3.574  | 0.85   |
| TECT1    | 1.853  | 1.14   |
| TECTA    | 6.468  | 0.07   |
| TECTB    | 0.99   | 0      |
| TEDDM1   | 2.33   | 0      |
| TEF      | 4.364  | 1.31   |
| TEGT     | 2.58   | 173.43 |
| TEK      | 4.62   | 0.09   |
| TEKT1    | 1.413  | 0      |
| TEKT2    | 1.509  | 0.06   |

|         |        |       |
|---------|--------|-------|
| TEKT3   | 1.696  | 0     |
| TEKT4   | 1.455  | 0.06  |
| TEKT5   | 1.609  | 0     |
| TELO2   | 3.253  | 15.18 |
| TENC1   | 5.372  | 12.78 |
| Tenr    | 1.961  | 0     |
| TEP1    | 9.499  | 6.77  |
| TEPP    | 1.021  | 0     |
| TERC    | 0.451  | 0.56  |
| TERF1   | 2.69   | 4.26  |
| TERF1P  | 2.959  | 0.11  |
| TERF2   | 3.137  | 27.85 |
| TERF2IP | 2.116  | 40.49 |
| TERT    | 4.872  | 0.52  |
| TES     | 5.588  | 0.03  |
| TESC    | 1.068  | 4.5   |
| TESK1   | 2.516  | 8.61  |
| TESK2   | 3.019  | 4.1   |
| TESSP1  | 1.112  | 0     |
| TESSP2  | 0.882  | 0     |
| TESSP5  | 0.783  | 0.11  |
| TETRA   | 1.757  | 37.01 |
| TEX10   | 3.024  | 7.85  |
| TEX101  | 1.565  | 0     |
| TEX11   | 3.198  | 0     |
| TEX12   | 1.144  | 0     |
| TEX13A  | 1.379  | 0     |
| TEX13B  | 1.248  | 0     |
| TEX14   | 4.927  | 0.07  |
| TEX15   | 10.112 | 0     |
| TEX2    | 5.09   | 8.59  |
| TEX261  | 3.367  | 22.07 |
| TEX264  | 2.613  | 39.97 |
| TEX9    | 1.414  | 0.06  |
| TF      | 2.318  | 0.98  |
| TFAM    | 1.936  | 7.87  |
| TFAP2A  | 2.933  | 0.48  |
| TFAP2B  | 1.975  | 0     |
| TFAP2C  | 2.866  | 0     |
| TFAP2D  | 2.04   | 0     |
| TFAP2E  | 2.949  | 12    |
| TFAP4   | 2.14   | 7.95  |
| TFB1M   | 1.288  | 2.74  |
| TFB2M   | 1.781  | 5.25  |
| TFCP2   | 2.372  | 15.91 |
| TFCP2L1 | 4.913  | 0     |
| TFDP1   | 2.367  | 15.3  |
| TFDP2   | 3.953  | 8.24  |
| TFDP3   | 1.68   | 0.2   |
| TFE3    | 3.393  | 11.04 |

|          |        |       |
|----------|--------|-------|
| TFEB     | 2.354  | 24.91 |
| TFEC     | 13.262 | 0.01  |
| TFF1     | 0.492  | 0     |
| TFF2     | 0.607  | 0     |
| TFF3     | 0.668  | 0.38  |
| TFG      | 2.204  | 13.91 |
| TFIP11   | 3.437  | 26.69 |
| TFPI     | 1.879  | 0.31  |
| TFPI2    | 2.346  | 0     |
| TFPT     | 1.069  | 25.45 |
| TFR2     | 5.748  | 1.45  |
| TFRC     | 5.012  | 6.89  |
| TG       | 8.453  | 0     |
| TGDS     | 1.902  | 1.9   |
| TGFA     | 4.089  | 0.04  |
| TGFB1    | 2.346  | 69.77 |
| TGFB111  | 1.802  | 7.81  |
| TGFB2    | 1.69   | 0     |
| TGFB3    | 2.58   | 2.41  |
| TGFB1    | 2.691  | 3.51  |
| TGFBR1   | 6.475  | 1.57  |
| TGFBR2   | 4.704  | 12.05 |
| TGFBR3   | 4.199  | 0.1   |
| TGFBRAP1 | 3.299  | 4.93  |
| TGIF1    | 3.633  | 8.19  |
| TGIF1P1  | 1.278  | 0.13  |
| TGIF2    | 3.393  | 11.99 |
| TGIF2LX  | 0.847  | 0     |
| TGIF2LY  | 0.861  | 0     |
| TGIF2P1  | 12.192 | 0.03  |
| TGM1     | 2.701  | 0.34  |
| TGM2     | 4.359  | 1.05  |
| TGM3     | 2.615  | 0     |
| TGM4     | 2.979  | 0.03  |
| TGM5     | 2.204  | 0     |
| TGM6     | 2.292  | 0     |
| TGM7     | 2.312  | 0     |
| TGOLN2   | 6.316  | 28.82 |
| TGS1     | 3.782  | 6.17  |
| TH       | 2      | 0     |
| TH1L     | 2.257  | 27.88 |
| THA1P    | 1.555  | 0     |
| THADA    | 7.027  | 5.01  |
| THAP1    | 3.83   | 2.22  |
| THAP10   | 2.028  | 0     |
| THAP11   | 1.886  | 19.12 |
| THAP2    | 4.724  | 0.48  |
| THAP3    | 2.471  | 7.39  |
| THAP4    | 2.158  | 31.81 |
| THAP5    | 3.136  | 0.62  |

|         |        |       |
|---------|--------|-------|
| THAP6   | 3.547  | 0.74  |
| THAP7   | 2.209  | 6.9   |
| THAP8   | 1.825  | 2.86  |
| THAP9   | 4.058  | 1.23  |
| THBD    | 4.032  | 0.5   |
| THBS1   | 5.79   | 53.64 |
| THBS2   | 5.809  | 0.32  |
| THBS3   | 3.147  | 3.88  |
| THBS4   | 3.355  | 0.13  |
| THEG    | 1.322  | 0     |
| THEM2   | 0.739  | 17.44 |
| THEM4   | 3.783  | 0.04  |
| THEM5   | 2.456  | 0.07  |
| THEX1   | 2.119  | 1.91  |
| THG1L   | 1.305  | 3.42  |
| THNSL1  | 2.551  | 2.12  |
| THOC1   | 2.081  | 7.69  |
| THOC2   | 4.452  | 11.11 |
| THOC3   | 1.563  | 42.47 |
| THOC4   | 1.088  | 53.19 |
| THOC5   | 2.754  | 13    |
| THOC6   | 1.354  | 21.09 |
| THOC7   | 0.92   | 32.69 |
| THOP1   | 2.55   | 26.82 |
| THPO    | 3.009  | 0     |
| THRA    | 5.494  | 10.32 |
| THRAP1  | 7.715  | 4.36  |
| THRAP2  | 9.53   | 16.05 |
| THRAP3  | 4.126  | 55.83 |
| THRAP4  | 3.677  | 20.3  |
| THRAP5  | 2.924  | 20.11 |
| THRAP6  | 0.907  | 15.79 |
| THRB    | 6.341  | 0     |
| THRSP   | 1.174  | 0.07  |
| THSD1   | 3.039  | 0.28  |
| THSD1P  | 30.249 | 0.44  |
| THSD3   | 5.171  | 0.03  |
| THSD4   | 9.145  | 0     |
| THSD7A  | 12.77  | 0     |
| THSD7B  | 5.846  | 0.02  |
| THTPA   | 2.132  | 10.83 |
| THUMPD1 | 4.416  | 6.92  |
| THUMPD2 | 1.94   | 8.29  |
| THUMPD3 | 2.898  | 6.51  |
| THY1    | 1.772  | 1.23  |
| THYN1   | 1.769  | 14.05 |
| TIA1    | 2.949  | 15.99 |
| TIAF1   | 2.089  | 63.27 |
| TIAL1   | 4.042  | 15.32 |
| TIAM1   | 5.588  | 3.42  |

|          |       |        |
|----------|-------|--------|
| TIAM2    | 6.224 | 4.84   |
| TICAM1   | 4.115 | 3.69   |
| TICAM2   | 3.453 | 1.15   |
| TIE1     | 3.882 | 15.67  |
| TIFA     | 3.073 | 8.39   |
| TIFAB    | 1.413 | 0.3    |
| TIGD1    | 2.448 | 2.62   |
| TIGD2    | 2.072 | 1.78   |
| TIGD3    | 1.823 | 0.14   |
| TIGD4    | 2.433 | 0.14   |
| TIGD5    | 2.264 | 4.84   |
| TIGD6    | 3.493 | 0.99   |
| TIGD7    | 2.569 | 5.8    |
| TIMD4    | 1.292 | 0.85   |
| TIMELESS | 4.354 | 7.2    |
| TIMM10   | 0.674 | 18.87  |
| TIMM13   | 2.72  | 37.91  |
| TIMM17A  | 1.63  | 8.17   |
| TIMM17B  | 0.948 | 16.97  |
| TIMM22   | 1.69  | 13.55  |
| TIMM23   | 1.168 | 30.65  |
| TIMM44   | 1.83  | 12.98  |
| TIMM50   | 2.572 | 16.08  |
| TIMM8A   | 1.166 | 4.33   |
| TIMM8B   | 0.414 | 60.63  |
| TIMM9    | 1.078 | 19.46  |
| TIMP1    | 0.916 | 51.4   |
| TIMP2    | 3.655 | 13.04  |
| TIMP3    | 5.486 | 1.06   |
| TIMP4    | 1.429 | 0.12   |
| TINAG    | 1.767 | 0      |
| TINAGL1  | 2.163 | 0.47   |
| TINF2    | 2.095 | 29.95  |
| TINP1    | 1.104 | 56.01  |
| TIP39    | 0.459 | 0.73   |
| TIPARP   | 3.836 | 2.02   |
| TIPIN    | 1.054 | 3.6    |
| TIPRL    | 3.22  | 5.65   |
| TIRAP    | 3.217 | 1.02   |
| TITF1    | 2.338 | 0      |
| TJAP1    | 2.72  | 13.75  |
| TJP1     | 7.165 | 0.01   |
| TJP2     | 4.603 | 10.01  |
| TJP3     | 2.859 | 0.12   |
| TK1      | 1.42  | 23.31  |
| TK2      | 3.675 | 10.64  |
| TKT      | 1.98  | 170.34 |
| TKTL1    | 2.515 | 0      |
| TKTL2    | 2.739 | 0      |
| TLCD1    | 1.007 | 0.17   |

|           |       |        |
|-----------|-------|--------|
| TLE1      | 3.626 | 22.62  |
| TLE2      | 2.562 | 0.65   |
| TLE3      | 2.357 | 5.79   |
| TLE4      | 4.749 | 14.24  |
| TLE6      | 1.976 | 0.25   |
| TLK1      | 4.045 | 8.89   |
| TLK2      | 3.604 | 4.12   |
| TLL1      | 6.654 | 0      |
| TLL2      | 6.753 | 0.06   |
| TLN1      | 8.17  | 44.13  |
| TLN2      | 8.5   | 0.34   |
| TLOC1     | 0.1   | 833.94 |
| TLR1      | 2.851 | 3.9    |
| TLR10     | 3.594 | 0.25   |
| TLR2      | 3.403 | 1.36   |
| TLR3      | 3.041 | 0.64   |
| TLR4      | 5.503 | 3.34   |
| TLR5      | 3.368 | 0.48   |
| TLR6      | 2.753 | 1.1    |
| TLR7      | 4.992 | 0.77   |
| TLR7-like | 3.281 | 0.51   |
| TLR8      | 4.542 | 0.08   |
| TLR9      | 3.868 | 2.27   |
| TLX1      | 2.906 | 0      |
| TLX2      | 1.752 | 0      |
| TLX3      | 1.493 | 0      |
| TM2D1     | 1.25  | 5.39   |
| TM2D2     | 4.333 | 3.67   |
| TM2D3     | 1.407 | 4.49   |
| TM4SF1    | 1.691 | 16.04  |
| TM4SF18   | 1.153 | 0      |
| TM4SF19   | 0.961 | 0.53   |
| TM4SF20   | 2.294 | 0      |
| TM4SF4    | 1.428 | 0      |
| TM4SF5    | 0.708 | 0.24   |
| TM6SF1    | 1.418 | 0.06   |
| TM6SF2    | 2.61  | 0      |
| TM7SF2    | 2.094 | 4.27   |
| TM7SF3    | 2.525 | 17.84  |
| TM7SF4    | 1.952 | 0      |
| TM9SF1    | 3.053 | 13.61  |
| TM9SF2    | 2.391 | 38.26  |
| TM9SF3    | 3.893 | 28.99  |
| TM9SF4    | 3.727 | 22.37  |
| TMBIM1    | 2.349 | 36.83  |
| TMBIM4    | 1.298 | 20.11  |
| TMC1      | 3.201 | 0      |
| TMC2      | 3.169 | 0.03   |
| TMC3      | 3.303 | 0      |
| TMC4      | 2.358 | 0.47   |

|          |         |        |
|----------|---------|--------|
| TMC5     | 3.33    | 0.08   |
| TMC6     | 3.612   | 29.81  |
| TMC7     | 3.569   | 0      |
| TMC8     | 3.545   | 25.12  |
| TMCC1    | 6.99    | 2.42   |
| TMCC2    | 3.792   | 2.53   |
| TMCC3    | 4.726   | 0.02   |
| TMCO1    | 1.42    | 21.71  |
| TMCO2    | 0.739   | 0      |
| TMCO3    | 3.047   | 10.87  |
| TMCO4    | 2.947   | 7.29   |
| TMCO5    | 1.158   | 0      |
| TMCO6    | 1.889   | 8.07   |
| TMCO7    | 1.839   | 0.59   |
| TMDCI    | 104.716 | 0      |
| TMED1    | 1.357   | 12.54  |
| TMED10   | 4.085   | 42.38  |
| TMED10P  | 1.273   | 3.77   |
| TMED2    | 2.039   | 46.6   |
| TMED3    | 1.388   | 27.74  |
| TMED4    | 2.67    | 17.61  |
| TMED5    | 3.953   | 4.86   |
| TMED6    | 0.906   | 1.21   |
| TMED7    | 3.585   | 3.59   |
| TMED8    | 1.375   | 3.74   |
| TMED9    | 1.402   | 110.31 |
| TMEFF1   | 2.285   | 0.19   |
| TMEFF2   | 1.813   | 0      |
| TMEM1    | 7.77    | 4.6    |
| TMEM10   | 4.071   | 0.48   |
| TMEM100  | 1.67    | 0.05   |
| TMEM101  | 1.539   | 24.91  |
| TMEM102  | 1.973   | 3.25   |
| TMEM103  | 1.349   | 19.86  |
| TMEM104  | 4.131   | 7.91   |
| TMEM105  | 3.317   | 0      |
| TMEM106A | 2.795   | 13.36  |
| TMEM106B | 12.87   | 0.76   |
| TMEM106C | 1.43    | 21.15  |
| TMEM107  | 1.722   | 2.64   |
| TMEM108  | 2.148   | 0      |
| TMEM109  | 2.082   | 56.15  |
| TMEM11   | 1.193   | 13.7   |
| TMEM110  | 2.271   | 5.82   |
| TMEM111  | 1.082   | 24.37  |
| TMEM112  | 2.6     | 5.86   |
| TMEM112B | 2.658   | 23.9   |
| TMEM113  | 3.46    | 34.69  |
| TMEM115  | 2.095   | 14.07  |
| TMEM116  | 1.716   | 0.83   |

|          |       |       |
|----------|-------|-------|
| TMEM117  | 2.697 | 0.41  |
| TMEM118  | 1.761 | 0.2   |
| TMEM119  | 2.586 | 0.32  |
| TMEM121  | 1.519 | 6.49  |
| TMEM123  | 3.321 | 47.43 |
| TMEM125  | 1.639 | 1.39  |
| TMEM126A | 0.726 | 8.12  |
| TMEM126B | 1.12  | 4.74  |
| TMEM127  | 4.208 | 18.03 |
| TMEM128  | 1.732 | 5.11  |
| TMEM129  | 2.677 | 16.3  |
| TMEM130  | 5.988 | 0.02  |
| TMEM131  | 6.257 | 11.96 |
| TMEM132A | 3.716 | 1.36  |
| TMEM132B | 7.578 | 0.04  |
| TMEM132C | 5.271 | 0.02  |
| TMEM132D | 5.778 | 0     |
| TMEM132E | 4.369 | 0     |
| TMEM133  | 1.856 | 0.64  |
| TMEM134  | 0.945 | 14.26 |
| TMEM135  | 3.597 | 1.4   |
| TMEM136  | 0.886 | 0     |
| TMEM137  | 1.989 | 0.55  |
| TMEM138  | 1.162 | 11.23 |
| TMEM139  | 4.726 | 0.02  |
| TMEM140  | 3.965 | 5.42  |
| TMEM141  | 0.768 | 37.84 |
| TMEM142A | 1.475 | 41.46 |
| TMEM142B | 5.329 | 4.15  |
| TMEM142C | 2.178 | 20    |
| TMEM143  | 2.249 | 3.41  |
| TMEM144  | 3.043 | 1.1   |
| TMEM145  | 1.768 | 0     |
| TMEM146  | 2.513 | 0     |
| TMEM147  | 0.851 | 56.82 |
| TMEM148  | 1.787 | 0     |
| TMEM149  | 1.196 | 5.78  |
| TMEM14A  | 0.994 | 3.31  |
| TMEM14B  | 0.917 | 15.8  |
| TMEM14C  | 0.983 | 29.39 |
| TMEM150  | 2.361 | 4.96  |
| TMEM151  | 2.562 | 0.03  |
| TMEM154  | 3.765 | 15.3  |
| TMEM155  | 2.026 | 0     |
| TMEM156  | 2.136 | 5.48  |
| TMEM157  | 1.236 | 2.25  |
| TMEM158  | 1.797 | 0.19  |
| TMEM159  | 1.812 | 5.4   |
| TMEM160  | 0.655 | 22.37 |
| TMEM161A | 1.779 | 14.01 |



|          |       |       |
|----------|-------|-------|
| TMEM161B | 2.589 | 1.43  |
| TMEM162  | 1.179 | 0     |
| TMEM163  | 2.559 | 6.42  |
| TMEM164  | 1.906 | 4.82  |
| TMEM165  | 1.979 | 10.6  |
| TMEM166  | 1.815 | 1.25  |
| TMEM167  | 1.173 | 9.19  |
| TMEM168  | 7.842 | 0.89  |
| TMEM169  | 3.306 | 0     |
| TMEM16A  | 4.474 | 0     |
| TMEM16B  | 3.717 | 0     |
| TMEM16C  | 6.642 | 0     |
| TMEM16D  | 3.898 | 0     |
| TMEM16E  | 3.147 | 0     |
| TMEM16F  | 5.973 | 5.56  |
| TMEM16G  | 3.767 | 0.03  |
| TMEM16H  | 4.529 | 3.55  |
| TMEM16J  | 2.814 | 0.24  |
| TMEM16K  | 2.734 | 4.84  |
| TMEM17   | 1.405 | 1.68  |
| TMEM170  | 1.309 | 5.21  |
| TMEM171  | 1.249 | 0     |
| TMEM173  | 1.688 | 59.54 |
| TMEM174  | 1.322 | 0     |
| TMEM175  | 2.064 | 14.37 |
| TMEM176A | 2.076 | 0.53  |
| TMEM176B | 2.662 | 0.66  |
| TMEM177  | 1.385 | 9     |
| TMEM178  | 1.631 | 1.34  |
| TMEM179  | 1.623 | 0     |
| TMEM18   | 2.124 | 13.21 |
| TMEM180  | 2.834 | 1.33  |
| TMEM181  | 5.59  | 1.28  |
| TMEM182  | 3.275 | 1.13  |
| TMEM183A | 2.2   | 13.06 |
| TMEM183B | 1.706 | 13.43 |
| TMEM185A | 2.821 | 0     |
| TMEM185B | 2.131 | 9.88  |
| TMEM186  | 1.149 | 5.13  |
| TMEM19   | 4.659 | 4.57  |
| TMEM2    | 6.13  | 20.22 |
| TMEM20   | 2.399 | 0     |
| TMEM22   | 1.939 | 0     |
| TMEM23   | 3.753 | 2.31  |
| TMEM24   | 3.344 | 5.29  |
| TMEM25   | 2.409 | 2.35  |
| TMEM26   | 5.148 | 0     |
| TMEM27   | 1.568 | 0     |
| TMEM28   | 4.019 | 0     |
| TMEM29   | 2.251 | 3.18  |

|         |       |        |
|---------|-------|--------|
| TMEM30A | 4.402 | 12.84  |
| TMEM30B | 3.033 | 0.03   |
| TMEM30C | 1.062 | 0      |
| TMEM31  | 0.732 | 0      |
| TMEM32  | 3.648 | 7.06   |
| TMEM33  | 3.172 | 5.26   |
| TMEM34  | 2.914 | 4.6    |
| TMEM35  | 2.041 | 0      |
| TMEM37  | 0.573 | 0.44   |
| TMEM38A | 1.639 | 0.1    |
| TMEM38B | 2.076 | 1.62   |
| TMEM39A | 2.957 | 4.93   |
| TMEM39B | 1.79  | 20.14  |
| TMEM4   | 1.209 | 49.68  |
| TMEM40  | 1.71  | 0      |
| TMEM41A | 1.733 | 4.27   |
| TMEM41B | 1.625 | 3.21   |
| TMEM42  | 0.973 | 13.59  |
| TMEM43  | 3.236 | 21.79  |
| TMEM44  | 2.345 | 6.32   |
| TMEM45A | 1.564 | 0.86   |
| TMEM45B | 2.207 | 0.15   |
| TMEM46  | 2.889 | 2.59   |
| TMEM47  | 4.054 | 0.02   |
| TMEM48  | 2.86  | 5.33   |
| TMEM49  | 2.509 | 13.83  |
| TMEM5   | 1.451 | 4.18   |
| TMEM50A | 2.28  | 34.69  |
| TMEM50B | 2.332 | 4.95   |
| TMEM51  | 1.81  | 1.63   |
| TMEM52  | 0.922 | 0.09   |
| TMEM53  | 1.6   | 2.85   |
| TMEM54  | 0.993 | 0.42   |
| TMEM55A | 2.254 | 1.09   |
| TMEM55B | 1.687 | 12.73  |
| TMEM56  | 2.443 | 0.14   |
| TMEM57  | 3.138 | 7.57   |
| TMEM58  | 1.138 | 0.74   |
| TMEM59  | 1.696 | 36.56  |
| TMEM60  | 1.746 | 3.57   |
| TMEM61  | 1.097 | 0      |
| TMEM62  | 2.769 | 1.52   |
| TMEM63A | 4.074 | 11.46  |
| TMEM63B | 3.199 | 5.61   |
| TMEM63C | 5.334 | 3.02   |
| TMEM64  | 1.551 | 1.3    |
| TMEM65  | 3.228 | 0.76   |
| TMEM66  | 1.977 | 128.84 |
| TMEM67  | 3.453 | 0.61   |
| TMEM68  | 2.317 | 1.67   |

|           |       |       |
|-----------|-------|-------|
| TMEM69    | 1.448 | 12.56 |
| TMEM70    | 2.028 | 6.44  |
| TMEM71    | 1.993 | 0.3   |
| TMEM74    | 2.087 | 0     |
| TMEM75    | 2.165 | 0     |
| TMEM77    | 1.759 | 14.03 |
| TMEM78    | 2.175 | 0.04  |
| TMEM79    | 2.156 | 3.94  |
| TMEM8     | 2.797 | 12.25 |
| TMEM80    | 1.572 | 12.92 |
| TMEM81    | 1.332 | 1.08  |
| TMEM83    | 1.786 | 0     |
| TMEM85    | 1.229 | 41.95 |
| TMEM86A   | 3.582 | 1.6   |
| TMEM86B   | 1.641 | 3.85  |
| TMEM87A   | 2.875 | 7.88  |
| TMEM87B   | 3.466 | 2.97  |
| TMEM88    | 0.874 | 0.29  |
| TMEM89    | 0.48  | 0     |
| TMEM9     | 1.527 | 20.24 |
| TMEM92    | 2.685 | 4.64  |
| TMEM93    | 0.892 | 23.79 |
| TMEM95    | 1.169 | 0     |
| TMEM97    | 2.115 | 5.73  |
| TMEM98    | 1.795 | 0.14  |
| TMEM99    | 0.855 | 9.56  |
| TMEM9B    | 1.753 | 11.68 |
| TMEPAI    | 5.444 | 0.08  |
| TMF1      | 3.282 | 3.75  |
| TMIE      | 1.649 | 0.46  |
| TMIGD1    | 1.201 | 0     |
| TMIGD2    | 1.262 | 0.14  |
| TMLHE     | 2.835 | 6.51  |
| TMOD1     | 2.664 | 1.39  |
| TMOD2     | 2.917 | 0.23  |
| TMOD3     | 2.498 | 9.58  |
| TMOD4     | 1.201 | 1.47  |
| TMPIT     | 2.56  | 3.92  |
| TMPO      | 5.411 | 17.98 |
| TMPRSS11A | 2.428 | 0     |
| TMPRSS11B | 2.642 | 0     |
| TMPRSS11D | 2.783 | 0     |
| TMPRSS11E | 2.103 | 0     |
| TMPRSS11F | 2.077 | 0     |
| TMPRSS12  | 1.451 | 0     |
| TMPRSS13  | 3.263 | 0.15  |
| TMPRSS2   | 3.194 | 0     |
| TMPRSS3   | 3.603 | 0.03  |
| TMPRSS4   | 2.846 | 0     |
| TMPRSS5   | 2.232 | 0.08  |

|           |        |        |
|-----------|--------|--------|
| TMPRSS6   | 3.191  | 0      |
| TMPRSS7   | 2.717  | 0      |
| TMPRSS9   | 3.18   | 0.42   |
| TMSB10    | 0.482  | 1898.1 |
| TMSB4X    | 0.628  | 591.53 |
| TMSB4Y    | 1.669  | 1.16   |
| TMSL1     | 0.547  | 1.7    |
| TMSL2     | 0.538  | 1.73   |
| TMSL3     | 0.634  | 72.68  |
| TMSL4     | 0.54   | 6.71   |
| TMSL5     | 0.438  | 1.92   |
| TMSL7     | 0.482  | 0.53   |
| TMSL8     | 0.666  | 0      |
| TMTC1     | 8.821  | 0      |
| TMTC2     | 4.84   | 0.08   |
| TMTC3     | 4.971  | 0.15   |
| TMTC4     | 2.624  | 1.87   |
| TMUB1     | 2.944  | 9.02   |
| TMUB2     | 6.739  | 18.66  |
| TNC       | 7.544  | 0.09   |
| TncRNA    | 14.639 | 10.14  |
| TNF       | 5.007  | 0      |
| TNFAIP1   | 3.569  | 4.53   |
| TNFAIP2   | 4.175  | 5.75   |
| TNFAIP3   | 4.86   | 20.52  |
| TNFAIP6   | 1.423  | 0      |
| TNFAIP8   | 1.99   | 5.12   |
| TNFAIP8L1 | 2.187  | 12.63  |
| TNFAIP8L2 | 1.152  | 25.44  |
| TNFAIP8L3 | 2.259  | 0.48   |
| TNFRSF10A | 1.709  | 0.99   |
| TNFRSF10B | 4.331  | 9.35   |
| TNFRSF10C | 1.387  | 0.3    |
| TNFRSF10D | 3.535  | 8.76   |
| TNFRSF11A | 3.126  | 4.28   |
| TNFRSF11B | 2.274  | 0.3    |
| TNFRSF12A | 0.986  | 1.03   |
| TNFRSF13B | 1.358  | 0.13   |
| TNFRSF13C | 0.895  | 4.52   |
| TNFRSF14  | 1.983  | 45.07  |
| TNFRSF17  | 0.994  | 0.08   |
| TNFRSF18  | 1.835  | 0.32   |
| TNFRSF19  | 4.878  | 0      |
| TNFRSF19L | 7.514  | 11.12  |
| TNFRSF1A  | 2.204  | 98.76  |
| TNFRSF1B  | 3.675  | 57.35  |
| TNFRSF21  | 3.634  | 6.12   |
| TNFRSF25  | 2.086  | 0.12   |
| TNFRSF4   | 1.068  | 0.24   |
| TNFRSF6B  | 1.558  | 3.08   |

|                 |        |       |
|-----------------|--------|-------|
| TNFRSF8         | 4.046  | 2.17  |
| TNFRSF9         | 1.884  | 0     |
| TNFSF10         | 1.759  | 1.96  |
| TNFSF11         | 2.279  | 0     |
| TNFSF12         | 1.386  | 7.96  |
| TNFSF12-TNFSF13 | 1.823  | 12.94 |
| TNFSF13         | 2.959  | 8.74  |
| TNFSF13B        | 1.204  | 0.07  |
| TNFSF14         | 1.593  | 0     |
| TNFSF15         | 2.004  | 0     |
| TNFSF18         | 0.61   | 0     |
| TNFSF4          | 3.493  | 13.1  |
| TNFSF5IP1       | 1.047  | 21.48 |
| TNFSF8          | 1.979  | 1.06  |
| TNFSF9          | 1.632  | 2.79  |
| TNIK            | 4.083  | 0.02  |
| TNIP1           | 2.913  | 57.49 |
| TNIP2           | 1.932  | 17.44 |
| TNIP3           | 2.393  | 0     |
| TNK1            | 2.769  | 0.15  |
| TNK2            | 5.018  | 13.36 |
| TNKS            | 9.599  | 2.46  |
| TNKS1BP1        | 5.952  | 2.66  |
| TNKS2           | 6.156  | 5.72  |
| TNMD            | 1.304  | 0     |
| TNN             | 5.008  | 0.08  |
| TNNC1           | 0.686  | 0.37  |
| TNNC2           | 0.683  | 0     |
| TNNI1           | 6.143  | 0     |
| TNNI2           | 0.7    | 1.56  |
| TNNI3           | 0.786  | 0     |
| TNNI3K          | 3.001  | 0.03  |
| TNNT1           | 0.98   | 0     |
| TNNT2           | 1.168  | 0     |
| TNNT3           | 1.001  | 0     |
| TNP1            | 0.402  | 0     |
| TNP2            | 0.597  | 0     |
| TNPO1           | 3.106  | 6.16  |
| TNPO2           | 4.871  | 12.73 |
| TNPO3           | 7.338  | 4.74  |
| TNR             | 4.716  | 0     |
| TNRC15          | 5.959  | 11.27 |
| TNRC18          | 5.7    | 0.09  |
| TNRC4           | 3.297  | 0.97  |
| TNRC5           | 3.319  | 91.32 |
| TNRC6A          | 9.778  | 2.37  |
| TNRC6B          | 18.507 | 2.69  |
| TNRC6C          | 5.548  | 2.24  |
| TNRC9           | 5.328  | 0     |
| TNS1            | 7.251  | 1.99  |

|          |        |        |
|----------|--------|--------|
| TNS3     | 15.254 | 3.16   |
| TNS4     | 4.013  | 0.02   |
| TNT      | 2.463  | 0      |
| TNXA     | 5.686  | 0      |
| TNXB     | 31.907 | 0.07   |
| TOB1     | 2.098  | 12.73  |
| TOB2     | 4.565  | 17.77  |
| TOE1     | 2.277  | 9.87   |
| TOLLIP   | 3.604  | 8.37   |
| TOM1     | 2.311  | 9.25   |
| TOM1L1   | 2.17   | 0.12   |
| TOM1L2   | 3.705  | 5.52   |
| TOMM20   | 3.258  | 35.65  |
| TOMM22   | 1.378  | 94.08  |
| TOMM34   | 2.049  | 18.05  |
| TOMM40   | 2.192  | 36.47  |
| TOMM40L  | 2.679  | 4.53   |
| TOMM7    | 1.458  | 105.32 |
| TOMM70A  | 4.36   | 13.49  |
| TOP1     | 3.962  | 37.17  |
| TOP1MT   | 1.91   | 36.12  |
| TOP1P1   | 2.431  | 5.85   |
| TOP1P2   | 1.521  | 0      |
| TOP2A    | 5.698  | 19.16  |
| TOP2B    | 5.796  | 55.4   |
| TOP3A    | 4.116  | 5.75   |
| TOP3B    | 3.107  | 7.73   |
| TOP3B2   | 0.48   | 1.4    |
| TOPBP1   | 5.261  | 6.5    |
| TOPORS   | 4.148  | 2.05   |
| TOR1A    | 2.106  | 16.52  |
| TOR1AIP1 | 3.807  | 9.89   |
| TOR1AIP2 | 3.767  | 3.85   |
| TOR1B    | 2.769  | 5.75   |
| TOR2A    | 2.467  | 6.97   |
| TOR3A    | 2.012  | 19.8   |
| TOX      | 4.62   | 9.92   |
| TP53     | 2.621  | 75.4   |
| TP53BP1  | 6.696  | 9.66   |
| TP53BP2  | 5.682  | 4.48   |
| TP53I11  | 3.333  | 34.65  |
| TP53I13  | 2.047  | 21.6   |
| TP53I3   | 1.878  | 4.26   |
| TP53INP1 | 6.344  | 20     |
| TP53INP2 | 4.124  | 1.41   |
| TP53RK   | 3.373  | 4.74   |
| TP53TG3  | 2.034  | 0      |
| TP73     | 2.234  | 0      |
| TP73L    | 4.906  | 0      |
| TPBG     | 2.376  | 6.81   |

|          |         |         |
|----------|---------|---------|
| TPCN1    | 4.319   | 8.45    |
| TPCN2    | 2.931   | 2.3     |
| TPD52    | 4.491   | 6.34    |
| TPD52L1  | 2.41    | 0.03    |
| TPD52L2  | 2.412   | 79.83   |
| TPD52L3  | 4.077   | 0       |
| TPH1     | 1.335   | 0       |
| TPH2     | 2.36    | 0       |
| TPI1     | 1.22    | 190.57  |
| TPK1     | 4.834   | 0.28    |
| TPM1     | 3.627   | 1.18    |
| TPM2     | 2.584   | 17.93   |
| TPM3     | 3.023   | 83.96   |
| TPM4     | 2.759   | 119.23  |
| TPM5P    | 1.034   | 0.08    |
| TPMT     | 3.25    | 1.79    |
| TPMTP1   | 0.741   | 0.79    |
| TPO      | 3.526   | 0.29    |
| TPP1     | 3.498   | 121.01  |
| TPP2     | 4.621   | 8.18    |
| TPPP     | 5.019   | 0.2     |
| TPR      | 7.492   | 13.26   |
| TPRKB    | 0.704   | 14.36   |
| TPRX1    | 1.839   | 0       |
| TPRX1P2  | 0.925   | 0       |
| TPRX2P   | 1.909   | 0       |
| TPRXL    | 130.743 | 0       |
| TPSAB1   | 1.194   | 0.64    |
| TPSB2    | 1.166   | 0.65    |
| TPSD1    | 0.855   | 0       |
| TPSG1    | 1.105   | 0       |
| TPST1    | 4.502   | 5.28    |
| TPST2    | 2.075   | 53.3    |
| TPT1     | 1.129   | 7857.22 |
| TPTE     | 2.836   | 0       |
| TPTE2    | 2.212   | 0       |
| TPX2     | 3.662   | 24.36   |
| TR2IT1   | 1.134   | 0.08    |
| TRA@     | 0.5     | 11.12   |
| TRA16    | 1.299   | 11.8    |
| TRA2A    | 3.568   | 29.7    |
| TRABD    | 2.315   | 64.77   |
| TRAC     | 0.954   | 16.33   |
| TRADD    | 2.44    | 10.95   |
| TRAF1    | 4.449   | 0.59    |
| TRAF2    | 2.277   | 7.62    |
| TRAF3    | 2.567   | 3.02    |
| TRAF3IP1 | 2.535   | 4.19    |
| TRAF3IP2 | 3.546   | 42.14   |
| TRAF3IP3 | 2.058   | 23.05   |

|        |       |       |
|--------|-------|-------|
| TRAF4  | 2.135 | 6.55  |
| TRAF5  | 4.09  | 3.46  |
| TRAF6  | 2.571 | 2.95  |
| TRAF7  | 5.49  | 17.94 |
| TRAFD1 | 2.62  | 24.18 |
| TRAIP  | 2.024 | 4.21  |
| TRAJ1  | 0.1   | 0     |
| TRAJ10 | 0.1   | 0     |
| TRAJ11 | 0.1   | 0     |
| TRAJ12 | 0.1   | 0     |
| TRAJ13 | 0.1   | 0     |
| TRAJ14 | 0.1   | 0     |
| TRAJ15 | 0.1   | 0     |
| TRAJ16 | 0.1   | 0     |
| TRAJ17 | 0.1   | 0     |
| TRAJ18 | 0.1   | 0     |
| TRAJ19 | 0.1   | 0     |
| TRAJ2  | 0.1   | 0     |
| TRAJ20 | 0.1   | 0     |
| TRAJ21 | 0.1   | 0     |
| TRAJ22 | 0.1   | 0     |
| TRAJ23 | 0.1   | 0     |
| TRAJ24 | 0.1   | 0     |
| TRAJ25 | 0.1   | 0     |
| TRAJ26 | 0.1   | 0     |
| TRAJ27 | 0.1   | 0     |
| TRAJ28 | 0.1   | 0     |
| TRAJ29 | 0.1   | 0     |
| TRAJ3  | 0.1   | 0     |
| TRAJ30 | 0.1   | 0     |
| TRAJ31 | 0.1   | 0     |
| TRAJ32 | 0.1   | 0     |
| TRAJ33 | 0.1   | 0     |
| TRAJ34 | 0.1   | 0     |
| TRAJ35 | 0.1   | 0     |
| TRAJ36 | 0.1   | 0     |
| TRAJ37 | 0.1   | 0     |
| TRAJ38 | 0.1   | 0     |
| TRAJ39 | 0.1   | 0     |
| TRAJ4  | 0.1   | 0     |
| TRAJ40 | 0.1   | 0     |
| TRAJ41 | 0.1   | 0     |
| TRAJ42 | 0.1   | 0     |
| TRAJ43 | 0.1   | 0     |
| TRAJ44 | 0.1   | 0     |
| TRAJ45 | 0.1   | 0     |
| TRAJ46 | 0.1   | 0     |
| TRAJ47 | 0.1   | 0     |
| TRAJ48 | 0.1   | 0.84  |
| TRAJ49 | 0.1   | 2.52  |



|           |       |        |
|-----------|-------|--------|
| TRAJ5     | 0.1   | 0      |
| TRAJ50    | 0.1   | 0      |
| TRAJ51    | 0.1   | 0      |
| TRAJ52    | 0.1   | 0      |
| TRAJ53    | 0.1   | 0.84   |
| TRAJ54    | 0.1   | 0      |
| TRAJ55    | 0.1   | 0      |
| TRAJ56    | 0.1   | 0.84   |
| TRAJ57    | 0.1   | 0.84   |
| TRAJ58    | 0.1   | 0      |
| TRAJ59    | 0.1   | 0      |
| TRAJ6     | 0.1   | 0      |
| TRAJ60    | 0.1   | 0      |
| TRAJ61    | 0.1   | 0      |
| TRAJ7     | 0.1   | 0      |
| TRAJ8     | 0.1   | 0      |
| TRAJ9     | 0.1   | 0      |
| TRAK1     | 7.1   | 17.06  |
| TRAK2     | 6.462 | 7.62   |
| TRAM1     | 2.789 | 19.42  |
| TRAM1L1   | 2.023 | 0.66   |
| TRAM2     | 7.057 | 19.18  |
| TRAP1     | 2.211 | 23.7   |
| TRAPPC1   | 0.813 | 140.81 |
| TRAPPC2   | 2.833 | 4.9    |
| TRAPPC2L  | 0.629 | 37.76  |
| TRAPPC3   | 1.262 | 40.31  |
| TRAPPC4   | 1.198 | 22.92  |
| TRAPPC6A  | 0.795 | 48.11  |
| TRAPPC6B  | 3.151 | 5.24   |
| TRAT1     | 1.695 | 0.05   |
| TRAV10    | 0.343 | 0      |
| TRAV11    | 0.871 | 0      |
| TRAV1-1   | 0.326 | 0      |
| TRAV1-2   | 0.326 | 0      |
| TRAV12-1  | 0.337 | 0      |
| TRAV12-2  | 0.343 | 0      |
| TRAV12-3  | 0.343 | 0      |
| TRAV13-1  | 0.337 | 0.25   |
| TRAV13-2  | 0.34  | 0      |
| TRAV14DV4 | 0.35  | 0.24   |
| TRAV15    | 0.888 | 0      |
| TRAV16    | 0.329 | 0      |
| TRAV17    | 0.337 | 0      |
| TRAV18    | 0.335 | 0      |
| TRAV19    | 0.35  | 0      |
| TRAV2     | 0.338 | 0      |
| TRAV20    | 0.337 | 0.75   |
| TRAV21    | 0.336 | 0.5    |
| TRAV22    | 0.331 | 0      |

|             |       |      |
|-------------|-------|------|
| TRAV23DV6   | 0.364 | 0    |
| TRAV24      | 0.343 | 0    |
| TRAV25      | 0.327 | 0    |
| TRAV26-1    | 0.328 | 0    |
| TRAV26-2    | 0.327 | 0    |
| TRAV27      | 0.328 | 0    |
| TRAV28      | 0.883 | 0    |
| TRAV29DV5   | 0.358 | 0    |
| TRAV3       | 0.343 | 0.49 |
| TRAV30      | 0.337 | 0    |
| TRAV31      | 0.934 | 0    |
| TRAV32      | 0.844 | 0    |
| TRAV33      | 0.896 | 0    |
| TRAV34      | 0.337 | 0    |
| TRAV35      | 0.33  | 0    |
| TRAV36DV7   | 0.34  | 0    |
| TRAV37      | 2.676 | 0    |
| TRAV38-1    | 0.35  | 0    |
| TRAV38-2DV8 | 0.349 | 0.24 |
| TRAV39      | 0.331 | 0    |
| TRAV4       | 0.328 | 0.25 |
| TRAV40      | 0.317 | 0    |
| TRAV41      | 0.336 | 0    |
| TRAV5       | 0.34  | 0    |
| TRAV6       | 0.34  | 0    |
| TRAV7       | 0.337 | 0    |
| TRAV8-1     | 0.341 | 0    |
| TRAV8-2     | 0.341 | 0    |
| TRAV8-3     | 0.341 | 0    |
| TRAV8-4     | 0.341 | 0    |
| TRAV8-5     | 2.94  | 0    |
| TRAV8-6     | 0.341 | 0    |
| TRAV8-7     | 0.344 | 0    |
| TRAV9-1     | 0.338 | 0    |
| TRAV9-2     | 0.338 | 0    |
| TRB@        | 0.1   | 0    |
| TRBC1       | 1.066 | 1.58 |
| TRBC2       | 1.078 | 3.05 |
| TRBD1       | 0.1   | 0    |
| TRBD2       | 0.1   | 0    |
| TRBJ1-1     | 0.1   | 0    |
| TRBJ1-2     | 0.1   | 0    |
| TRBJ1-3     | 0.1   | 0    |
| TRBJ1-4     | 0.102 | 0    |
| TRBJ1-5     | 0.1   | 0    |
| TRBJ1-6     | 0.106 | 0    |
| TRBJ2-1     | 0.1   | 0    |
| TRBJ2-2     | 0.102 | 0    |
| TRBJ2-2P    | 0.1   | 0.84 |
| TRBJ2-3     | 0.1   | 0    |

|             |       |       |
|-------------|-------|-------|
| TRBJ2-4     | 0.1   | 0     |
| TRBJ2-5     | 0.1   | 0     |
| TRBJ2-6     | 0.106 | 0     |
| TRBJ2-7     | 0.1   | 0     |
| TRBV1       | 1.566 | 0     |
| TRBV10-1    | 0.688 | 0     |
| TRBV10-2    | 0.688 | 0     |
| TRBV10-3    | 0.688 | 0     |
| TRBV11-1    | 0.694 | 0     |
| TRBV11-2    | 0.694 | 0     |
| TRBV11-3    | 0.694 | 0     |
| TRBV12-1    | 1.574 | 0     |
| TRBV12-2    | 1.574 | 0     |
| TRBV12-3    | 0.694 | 0.24  |
| TRBV12-4    | 0.694 | 0.36  |
| TRBV12-5    | 0.694 | 0     |
| TRBV13      | 0.748 | 0     |
| TRBV14      | 0.694 | 0     |
| TRBV15      | 0.688 | 0     |
| TRBV16      | 0.694 | 0     |
| TRBV17      | 0.688 | 0     |
| TRBV18      | 0.694 | 0     |
| TRBV19      | 0.688 | 0.12  |
| TRBV2       | 0.694 | 0.25  |
| TRBV20-1    | 0.77  | 18.82 |
| TRBV20OR9-2 | 0.999 | 0.25  |
| TRBV21-1    | 1.632 | 0     |
| TRBV21OR9-2 | 0.793 | 0     |
| TRBV22      | 0.74  | 0     |
| TRBV22OR9-2 | 0.768 | 0     |
| TRBV23-1    | 1.702 | 0     |
| TRBV23OR9-2 | 0.819 | 0     |
| TRBV24-1    | 0.69  | 0     |
| TRBV24OR9-2 | 0.833 | 0     |
| TRBV25-1    | 0.688 | 0.25  |
| TRBV25OR9-2 | 0.8   | 0     |
| TRBV26      | 1.658 | 0     |
| TRBV26OR9-2 | 0.826 | 0     |
| TRBV27      | 0.688 | 0     |
| TRBV28      | 0.688 | 0.37  |
| TRBV29-1    | 0.67  | 0     |
| TRBV29OR9-2 | 0.941 | 0     |
| TRBV30      | 0.67  | 0     |
| TRBV3-1     | 0.688 | 0     |
| TRBV3-2     | 0.432 | 0     |
| TRBV4-1     | 0.688 | 0     |
| TRBV4-2     | 0.688 | 0     |
| TRBV4-3     | 0.688 | 0     |
| TRBV5-1     | 0.686 | 0     |
| TRBV5-2     | 1.546 | 0     |

|            |       |      |
|------------|-------|------|
| TRBV5-3    | 1.62  | 0    |
| TRBV5-4    | 0.686 | 0    |
| TRBV5-5    | 0.686 | 0    |
| TRBV5-6    | 0.686 | 0.12 |
| TRBV5-7    | 0.686 | 0    |
| TRBV5-8    | 0.686 | 0    |
| TRBV6-1    | 0.688 | 0    |
| TRBV6-2    | 0.688 | 0    |
| TRBV6-3    | 0.688 | 0    |
| TRBV6-4    | 0.688 | 0.12 |
| TRBV6-5    | 0.688 | 0    |
| TRBV6-6    | 0.688 | 0    |
| TRBV6-7    | 0.688 | 0    |
| TRBV6-8    | 0.682 | 0    |
| TRBV6-9    | 0.688 | 0    |
| TRBV7-1    | 1.672 | 0    |
| TRBV7-2    | 0.694 | 0    |
| TRBV7-3    | 0.694 | 0.37 |
| TRBV7-4    | 0.694 | 0    |
| TRBV7-5    | 1.634 | 0    |
| TRBV7-6    | 0.694 | 0    |
| TRBV7-7    | 0.694 | 0    |
| TRBV7-8    | 0.694 | 0    |
| TRBV7-9    | 0.694 | 0    |
| TRBV8-1    | 2.324 | 0    |
| TRBV8-2    | 1.572 | 0    |
| TRBV9      | 0.686 | 0.37 |
| TRBVA      | 1.74  | 0    |
| TRBVAOR9-2 | 0.454 | 0    |
| TRBVB      | 1.87  | 0    |
| TRD@       | 0.1   | 0    |
| TRDC       | 1.51  | 0.11 |
| TRDD1      | 0.1   | 0    |
| TRDD2      | 0.1   | 0    |
| TRDD3      | 0.1   | 0    |
| TRDJ1      | 0.1   | 4.21 |
| TRDJ2      | 0.1   | 0    |
| TRDJ3      | 0.1   | 0    |
| TRDJ4      | 0.1   | 0    |
| TRDMT1     | 3.527 | 0.7  |
| TRDN       | 2.946 | 0    |
| TRDV1      | 0.347 | 0    |
| TRDV2      | 0.345 | 0    |
| TRDV3      | 0.341 | 0    |
| TREH       | 1.844 | 0    |
| TREM1      | 0.92  | 0.73 |
| TREM2      | 1.037 | 0.08 |
| TREML1     | 0.98  | 0.17 |
| TREML2     | 3.081 | 4.19 |
| TREML2P    | 0.213 | 0    |

|         |        |       |
|---------|--------|-------|
| TREML3  | 1.224  | 0     |
| TREML4  | 2.07   | 0     |
| TRERF1  | 6.214  | 2.17  |
| TREX1   | 7.374  | 4.48  |
| TREX2   | 1.255  | 0.27  |
| TRFP    | 2.478  | 8.4   |
| TRG@    | 0.1    | 0     |
| TRGC1   | 0.1    | 0     |
| TRGC2   | 1.138  | 0.88  |
| TRGJ1   | 0.1    | 0     |
| TRGJ2   | 0.1    | 0     |
| TRGJP   | 0.124  | 0     |
| TRGJP1  | 0.12   | 0     |
| TRGJP2  | 0.12   | 2.8   |
| TRGV1   | 1.642  | 0.05  |
| TRGV10  | 1.662  | 0.1   |
| TRGV11  | 1.64   | 0.1   |
| TRGV2   | 0.708  | 0.36  |
| TRGV3   | 0.708  | 1.9   |
| TRGV4   | 0.708  | 0.95  |
| TRGV5   | 0.708  | 0.12  |
| TRGV5P  | 1.652  | 0     |
| TRGV6   | 1.65   | 0     |
| TRGV7   | 1.654  | 0     |
| TRGV8   | 0.708  | 0     |
| TRGV9   | 0.732  | 0.23  |
| TRGVA   | 1.514  | 0     |
| TRGVB   | 1.662  | 0.1   |
| TRH     | 1.562  | 0.21  |
| TRHDE   | 5.618  | 0     |
| TRHR    | 1.344  | 0     |
| TRIAD3  | 12.894 | 4.76  |
| TRIAP1  | 1.182  | 19.88 |
| TRIB1   | 3.633  | 3.66  |
| TRIB2   | 4.198  | 0.44  |
| TRIB3   | 2.452  | 0     |
| TRIM10  | 12.027 | 0     |
| TRIM11  | 2.691  | 7.95  |
| TRIM13  | 9.066  | 1.43  |
| TRIM14  | 8.165  | 8     |
| TRIM15  | 7.959  | 0.01  |
| TRIM16  | 2.901  | 20.38 |
| TRIM16L | 1.982  | 2.46  |
| TRIM17  | 2.212  | 0.08  |
| TRIM2   | 6.731  | 1.77  |
| TRIM21  | 1.929  | 12.01 |
| TRIM22  | 2.808  | 54.8  |
| TRIM23  | 5.439  | 0.28  |
| TRIM24  | 8.344  | 2.33  |
| TRIM25  | 5.744  | 11.43 |

|              |        |       |
|--------------|--------|-------|
| TRIM26       | 10.464 | 0.63  |
| TRIM27       | 13.056 | 0.1   |
| TRIM28       | 2.959  | 149   |
| TRIM29       | 3.018  | 0     |
| TRIM3        | 3.037  | 1.89  |
| TRIM31       | 9.669  | 0     |
| TRIM32       | 3.141  | 4.21  |
| TRIM33       | 8.339  | 3.8   |
| TRIM34       | 3.216  | 2.57  |
| TRIM35       | 4.227  | 4.4   |
| TRIM36       | 4.892  | 0.02  |
| TRIM37       | 4.829  | 1.97  |
| TRIM38       | 3.276  | 17.54 |
| TRIM39       | 10.863 | 0.01  |
| TRIM4        | 6.766  | 3.25  |
| TRIM40       | 2.988  | 0     |
| TRIM41       | 4.315  | 10.91 |
| TRIM42       | 2.538  | 0     |
| TRIM43       | 1.627  | 0     |
| TRIM44       | 5.379  | 22.83 |
| TRIM45       | 3.571  | 0.97  |
| TRIM46       | 3.142  | 0.16  |
| TRIM47       | 2.263  | 0.41  |
| TRIM48       | 1.445  | 0     |
| TRIM49       | 2.163  | 0     |
| TRIM5        | 4.162  | 6.32  |
| TRIM50       | 4.094  | 0.78  |
| TRIM52       | 2.404  | 5.78  |
| TRIM54       | 1.757  | 0     |
| TRIM55       | 3.868  | 0     |
| TRIM56       | 7.094  | 2.31  |
| TRIM58       | 2.594  | 0.88  |
| TRIM59       | 3.876  | 1.46  |
| TRIM6        | 3.964  | 0.54  |
| TRIM60       | 1.842  | 0     |
| TRIM61       | 1.58   | 0.1   |
| TRIM62       | 3.436  | 3.21  |
| TRIM63       | 1.764  | 0     |
| TRIM64       | 1.71   | 0     |
| TRIM65       | 3.409  | 4.84  |
| TRIM67       | 3.929  | 0.13  |
| TRIM68       | 3.3    | 4.11  |
| TRIM69       | 2.752  | 4.19  |
| TRIM6-TRIM34 | 3.46   | 2.07  |
| TRIM7        | 5.758  | 0.12  |
| TRIM71       | 3.138  | 0.03  |
| TRIM72       | 2.097  | 0     |
| TRIM73       | 2.7    | 0.37  |
| TRIM74       | 2.7    | 0.22  |
| TRIM75       | 1.407  | 0     |

|        |        |       |
|--------|--------|-------|
| TRIM8  | 3.185  | 31.63 |
| TRIM9  | 6.675  | 1.68  |
| TRIML1 | 1.645  | 0     |
| TRIMP1 | 24.488 | 0.18  |
| TRIO   | 10.227 | 4.39  |
| TRIOBP | 10.735 | 4.57  |
| TRIP10 | 2.011  | 1.43  |
| TRIP11 | 6.453  | 2.12  |
| TRIP12 | 6.872  | 15.46 |
| TRIP13 | 2.351  | 2.54  |
| TRIP4  | 2.028  | 7.89  |
| TRIP6  | 3.504  | 10.22 |
| TRIT1  | 2.106  | 4.56  |
| TRLP1  | 0.1    | 0     |
| TRMEP1 | 0.1    | 0     |
| TRMT1  | 2.133  | 37.2  |
| TRMT11 | 1.953  | 1.9   |
| TRMT12 | 2.034  | 15.41 |
| TRMT5  | 5.272  | 1.32  |
| TRMU   | 1.964  | 6.31  |
| TRNA   | 0.1    | 0     |
| TRNC   | 0.1    | 0     |
| TRND   | 0.1    | 0     |
| TRNE   | 0.1    | 0     |
| TRNF   | 0.1    | 0     |
| TRNG   | 0.1    | 0     |
| TRNH   | 0.1    | 0     |
| TRNI   | 0.1    | 0     |
| TRNK   | 0.1    | 0     |
| TRNL1  | 0.1    | 0     |
| TRNL2  | 0.1    | 0     |
| TRNM   | 0.1    | 0     |
| TRNN   | 0.1    | 0     |
| TRNP   | 0.1    | 0     |
| TRNQ   | 0.1    | 0     |
| TRNR   | 0.1    | 0     |
| TRNS1  | 0.1    | 0     |
| TRNS2  | 0.1    | 0     |
| TRNT   | 0.1    | 0     |
| TRNT1  | 3.052  | 2.32  |
| TRNV   | 0.1    | 0     |
| TRNW   | 0.1    | 0     |
| TRNY   | 0.1    | 0     |
| TRO    | 5.007  | 1.44  |
| TROAP  | 2.527  | 8.36  |
| TROVE2 | 3.081  | 1.8   |
| TRPA1  | 5.19   | 0     |
| TRPC1  | 4.069  | 0     |
| TRPC2  | 12.265 | 0.26  |
| TRPC3  | 3.424  | 0.08  |

|          |        |        |
|----------|--------|--------|
| TRPC4    | 3.41   | 0      |
| TRPC4AP  | 3.313  | 30.08  |
| TRPC5    | 5.84   | 0      |
| TRPC6    | 4.54   | 0.03   |
| TRPC6P   | 1.804  | 0      |
| TRPC7    | 2.589  | 0      |
| TRPM1    | 5.428  | 0      |
| TRPM2    | 7.269  | 34     |
| TRPM3    | 7.095  | 0      |
| TRPM4    | 4.055  | 0.23   |
| TRPM5    | 3.914  | 0      |
| TRPM6    | 8.425  | 0      |
| TRPM7    | 7.218  | 4.66   |
| TRPM8    | 5.621  | 0.02   |
| TRPS1    | 9.99   | 0.03   |
| TRPT1    | 1.222  | 14.47  |
| TRPV1    | 4.982  | 4.5    |
| TRPV2    | 2.776  | 8.92   |
| TRPV3    | 3.42   | 0      |
| TRPV4    | 3.237  | 0      |
| TRPV5    | 4.972  | 0      |
| TRPV6    | 5.789  | 0.02   |
| TRRAP    | 25.126 | 3.03   |
| TRSPAP1  | 1.785  | 8.21   |
| TRUB1    | 3.399  | 3.3    |
| TRUB2    | 1.439  | 20.32  |
| TRY1     | 1.692  | 0      |
| TRY2P    | 10.93  | 0      |
| TRY3     | 8.722  | 0      |
| TRY5     | 7.132  | 0      |
| TRY6     | 9.078  | 0      |
| TRY7     | 7.14   | 0      |
| TSC1     | 9.185  | 2.51   |
| TSC2     | 5.705  | 19.66  |
| TSC22D1  | 6.258  | 15.25  |
| TSC22D2  | 3.901  | 2.83   |
| TSC22D3  | 3.126  | 133.09 |
| TSC22D4  | 5.006  | 141.63 |
| TSCOT    | 2.354  | 0.03   |
| TSEN2    | 2.359  | 2.4    |
| TSEN34   | 1.349  | 13.99  |
| TSEN54   | 1.905  | 14.41  |
| TSFM     | 1.218  | 14.04  |
| TSG101   | 1.534  | 29.22  |
| TSGA10   | 3.69   | 0.2    |
| TSGA10IP | 1.726  | 0      |
| TSGA13   | 3.306  | 0.05   |
| TSGA14   | 7.052  | 1.83   |
| TSGA2    | 1.367  | 0.06   |
| TSHB     | 0.578  | 0      |



|          |       |        |
|----------|-------|--------|
| TSHR     | 4.735 | 0.03   |
| TSHZ1    | 4.967 | 6.51   |
| TSHZ2    | 4.129 | 0.53   |
| TSHZ3    | 4.325 | 0.08   |
| TSKS     | 1.812 | 0.04   |
| TSKU     | 2.71  | 7.93   |
| TSLP     | 2.949 | 0      |
| TSN      | 3.408 | 18.09  |
| TSNARE1  | 1.901 | 0      |
| TSNAX    | 2.65  | 6.9    |
| TSNAXIP1 | 2.159 | 0.9    |
| TSP50    | 1.338 | 0.06   |
| TSPAN1   | 1.278 | 0      |
| TSPAN10  | 1.612 | 0.21   |
| TSPAN11  | 1.48  | 0.11   |
| TSPAN12  | 5.128 | 0      |
| TSPAN13  | 4.111 | 18.83  |
| TSPAN14  | 4.659 | 55.69  |
| TSPAN15  | 1.699 | 36.39  |
| TSPAN16  | 1.04  | 0      |
| TSPAN17  | 4.207 | 6.02   |
| TSPAN18  | 3.548 | 0.21   |
| TSPAN19  | 1     | 0      |
| TSPAN2   | 3.207 | 0.08   |
| TSPAN3   | 1.825 | 75.97  |
| TSPAN31  | 1.74  | 13.51  |
| TSPAN32  | 2.287 | 0.22   |
| TSPAN33  | 3.954 | 21.56  |
| TSPAN4   | 2.067 | 2.4    |
| TSPAN5   | 1.432 | 0.65   |
| TSPAN6   | 2.069 | 0      |
| TSPAN7   | 1.798 | 106.21 |
| TSPAN8   | 1.13  | 0      |
| TSPAN9   | 4.315 | 2.75   |
| TSPO     | 1.445 | 14.45  |
| TSPY1    | 1.16  | 0      |
| TSPY2    | 1.16  | 0      |
| TSPYL1   | 3.388 | 28.62  |
| TSPYL2   | 2.802 | 11.96  |
| TSPYL3   | 1.215 | 1.25   |
| TSPYL4   | 4.135 | 6.81   |
| TSPYL5   | 4.463 | 0.06   |
| TSPYL6   | 3.026 | 0      |
| TSPYP1   | 2.733 | 0      |
| TSPYP2   | 2.792 | 0      |
| TSPYP3   | 2.733 | 0      |
| TSPYP4   | 2.811 | 0      |
| TSPYP5   | 2.803 | 0      |
| TSR1     | 4.89  | 7.49   |
| TSR2     | 1.325 | 37.25  |

|        |        |       |
|--------|--------|-------|
| TSSC1  | 1.664  | 40.45 |
| TSSC4  | 1.424  | 21.36 |
| TSSK1A | 0.95   | 0.08  |
| TSSK1B | 1.996  | 0     |
| TSSK2  | 1.347  | 0     |
| TSSK3  | 1.317  | 1.79  |
| TSSK4  | 1.257  | 1     |
| TSSK6  | 1.442  | 0.23  |
| TST    | 1.128  | 16.58 |
| TSTA3  | 1.434  | 68.37 |
| TTBK1  | 7.128  | 0     |
| TTBK2  | 5.614  | 0.6   |
| TTC1   | 1.407  | 26.52 |
| TTC12  | 2.315  | 0     |
| TTC13  | 3.252  | 2.1   |
| TTC14  | 2.832  | 4.97  |
| TTC15  | 2.524  | 19.86 |
| TTC16  | 2.884  | 0.03  |
| TTC17  | 4.185  | 15.62 |
| TTC18  | 3.695  | 0.2   |
| TTC19  | 2.784  | 9.89  |
| TTC21A | 4.213  | 0.56  |
| TTC21B | 4.558  | 1.92  |
| TTC22  | 2.149  | 0     |
| TTC23  | 3.537  | 1.4   |
| TTC24  | 2.321  | 15.89 |
| TTC25  | 2.077  | 0     |
| TTC26  | 4.226  | 0.5   |
| TTC27  | 2.876  | 6.91  |
| TTC28  | 11.653 | 3.99  |
| TTC29  | 1.74   | 0     |
| TTC3   | 9.101  | 11.56 |
| TTC30A | 4.669  | 0.49  |
| TTC30B | 2.189  | 0.97  |
| TTC31  | 3.356  | 9.48  |
| TTC32  | 0.822  | 3.99  |
| TTC33  | 2.551  | 0.86  |
| TTC35  | 1.238  | 3.26  |
| TTC4   | 1.985  | 10.4  |
| TTC5   | 1.845  | 6.76  |
| TTC6   | 1.623  | 0     |
| TTC7A  | 5.06   | 40.46 |
| TTC7B  | 3.434  | 4.04  |
| TTC8   | 2.203  | 1.15  |
| TTC9   | 5.51   | 0     |
| TTC9B  | 0.835  | 0.1   |
| TTC9C  | 1.139  | 15.53 |
| TTF1   | 3.137  | 8     |
| TTF2   | 4.855  | 4.89  |
| TTK    | 2.968  | 2.24  |

|        |        |       |
|--------|--------|-------|
| TTL    | 4.744  | 6.89  |
| TTLL1  | 2.043  | 4     |
| TTLL10 | 2.111  | 0     |
| TTLL11 | 2.012  | 1.13  |
| TTLL12 | 3.353  | 19.07 |
| TTLL13 | 1.793  | 0     |
| TTLL2  | 2.684  | 0     |
| TTLL3  | 5.099  | 5.7   |
| TTLL4  | 4.191  | 2.75  |
| TTLL5  | 4.684  | 6.96  |
| TTLL6  | 2.533  | 0.03  |
| TTLL7  | 3.648  | 0.03  |
| TTLL9  | 2.623  | 1.41  |
| TTMA   | 3.024  | 0     |
| TTMB   | 2.761  | 0.71  |
| TTN    | 111.97 | 0.19  |
| TPA    | 1.249  | 0     |
| TTR    | 0.615  | 0     |
| TTRAP  | 1.925  | 7.96  |
| TTY1   | 0.91   | 0     |
| TTY10  | 1.628  | 0.25  |
| TTY11  | 0.834  | 0     |
| TTY12  | 0.979  | 0     |
| TTY13  | 0.659  | 0     |
| TTY14  | 0.515  | 3.27  |
| TTY15  | 5.242  | 1.72  |
| TTY16  | 0.192  | 0     |
| TTY17A | 0.166  | 0     |
| TTY17B | 0.166  | 0     |
| TTY17C | 0.166  | 0     |
| TTY18  | 0.221  | 0     |
| TTY19  | 0.269  | 0     |
| TTY2   | 3.168  | 0     |
| TTY20  | 0.259  | 0     |
| TTY21  | 0.307  | 0     |
| TTY22  | 0.427  | 0     |
| TTY23  | 0.512  | 0     |
| TTY3   | 0.344  | 0     |
| TTY3B  | 0.344  | 0     |
| TTY4   | 1.346  | 0     |
| TTY4B  | 1.346  | 0     |
| TTY4C  | 1.346  | 0     |
| TTY5   | 1.562  | 0     |
| TTY6   | 0.492  | 0     |
| TTY6B  | 0.473  | 0     |
| TTY7   | 1.367  | 0     |
| TTY8   | 0.531  | 0     |
| TTY9A  | 1.637  | 0     |
| TTY9B  | 1.637  | 0     |
| TYH1   | 2.684  | 0.06  |

|         |        |        |
|---------|--------|--------|
| TTYH2   | 4.255  | 37.99  |
| TTYH3   | 10.091 | 15.59  |
| TUB     | 6.6    | 0.04   |
| TUBA1A  | 1.666  | 37.87  |
| TUBA1B  | 1.753  | 257.66 |
| TUBA1C  | 1.553  | 43.78  |
| TUBA3C  | 1.69   | 0      |
| TUBA3D  | 1.622  | 7.95   |
| TUBA3E  | 1.54   | 0      |
| TUBA4A  | 1.478  | 96.78  |
| TUBA4B  | 20.326 | 0.03   |
| TUBA8   | 2.018  | 66.92  |
| TUBAL3  | 1.8    | 0      |
| TUBAP   | 1.731  | 0.44   |
| TUBB    | 7.462  | 2.84   |
| TUBB1   | 3.496  | 0.24   |
| TUBB2A  | 1.621  | 0.57   |
| TUBB2B  | 1.906  | 0.22   |
| TUBB2C  | 1.591  | 105.1  |
| TUBB3   | 1.711  | 1.13   |
| TUBB4   | 2.287  | 0.08   |
| TUBB4Q  | 1.305  | 0      |
| TUBB6   | 1.815  | 3.06   |
| TUBB8   | 1.335  | 0      |
| TUBBP3  | 0.882  | 0      |
| TUBD1   | 2.472  | 1.02   |
| TUBE1   | 2.082  | 2.06   |
| TUBG1   | 1.611  | 15.01  |
| TUBG2   | 1.773  | 1.52   |
| TUBGCP2 | 3.198  | 20.34  |
| TUBGCP3 | 3.893  | 7.66   |
| TUBGCP5 | 3.743  | 2.4    |
| TUBGCP6 | 8.076  | 8.58   |
| TUFM    | 1.605  | 134.09 |
| TUFT1   | 3.111  | 0.82   |
| TUG1    | 7.105  | 18.54  |
| TULP1   | 2.089  | 0      |
| TULP2   | 1.702  | 0.05   |
| TULP3   | 2.934  | 2.27   |
| TULP4   | 16.374 | 1.17   |
| TUSC1   | 1.882  | 0.04   |
| TUSC2   | 1.682  | 14.12  |
| TUSC3   | 1.871  | 0      |
| TUSC4   | 1.664  | 10.68  |
| TUSC5   | 3.596  | 0.05   |
| TUT1    | 2.73   | 9.23   |
| TWF1    | 3.686  | 0.89   |
| TWF2    | 1.625  | 39.35  |
| TWIST1  | 3.333  | 0      |
| TWISTNB | 7.784  | 1.45   |

|           |        |        |
|-----------|--------|--------|
| TWSG1     | 3.67   | 2.02   |
| TXK       | 2.563  | 0.1    |
| TXLNA     | 4.796  | 23.66  |
| TXLNB     | 4.633  | 0.64   |
| TXN       | 0.508  | 42.95  |
| TXN2      | 1.336  | 67.09  |
| TXNDC1    | 2.443  | 8.17   |
| TXNDC10   | 4.745  | 3.8    |
| TXNDC11   | 3.047  | 19.38  |
| TXNDC12   | 1.6    | 24.43  |
| TXNDC13   | 2.584  | 9.65   |
| TXNDC14   | 1.667  | 32.09  |
| TXNDC2    | 1.847  | 0      |
| TXNDC3    | 4.624  | 0      |
| TXNDC4    | 4.862  | 12.58  |
| TXNDC5    | 3.33   | 26.05  |
| TXNDC6    | 2.133  | 0      |
| TXNDC8    | 0.455  | 0      |
| TXNDC9    | 1.53   | 3.8    |
| TXNIP     | 2.704  | 212.15 |
| TXNL1     | 1.28   | 27.44  |
| TXNL2     | 1.902  | 11.12  |
| TXNL4A    | 1.387  | 32.07  |
| TXNL4B    | 2.516  | 4.35   |
| TXNL5     | 0.727  | 16.11  |
| TXNL6     | 0.908  | 0      |
| TXNRD1    | 4.068  | 11.89  |
| TXNRD2    | 1.964  | 4.25   |
| TXNRD3    | 3.118  | 0.08   |
| TYK2      | 4.206  | 24.43  |
| TYMS      | 1.529  | 56.3   |
| TYR       | 1.964  | 0      |
| TYRL      | 11.169 | 0      |
| TYRO3     | 3.949  | 0.45   |
| TYRO3P    | 0.864  | 0.1    |
| TYROBP    | 0.61   | 7.6    |
| TYRP1     | 2.805  | 0      |
| TYSND1    | 5.967  | 3.54   |
| TYW1      | 7.251  | 3.35   |
| TYW3      | 2.38   | 5.95   |
| U1SNRNPBP | 2.975  | 7.78   |
| U2AF1     | 1.198  | 48.24  |
| U2AF1L4   | 1.554  | 11.92  |
| U2AF2     | 3.218  | 108.31 |
| U58       | 0.1    | 0      |
| UACA      | 7.262  | 1.61   |
| UAP1      | 2.294  | 1.61   |
| UAP1L1    | 3.201  | 1.71   |
| UBA52     | 2.895  | 313.87 |
| UBA52P1   | 0.95   | 14.09  |

|         |       |        |
|---------|-------|--------|
| UBA52P2 | 0.34  | 0.49   |
| UBA52P3 | 0.521 | 152.31 |
| UBADC1  | 1.867 | 17.01  |
| UBAP1   | 2.735 | 8.72   |
| UBAP2   | 4.284 | 8.14   |
| UBAP2L  | 4.251 | 37.99  |
| UBASH3A | 2.492 | 0.03   |
| UBB     | 0.971 | 565.36 |
| UBBP1   | 0.615 | 25.61  |
| UBBP2   | 0.425 | 14.66  |
| UBBP3   | 0.376 | 0      |
| UBBP4   | 0.914 | 1.57   |
| UBC     | 2.404 | 411.41 |
| UBCH7N2 | 0.357 | 1.89   |
| UBD     | 2.913 | 0      |
| UBE1    | 3.793 | 109.57 |
| UBE1C   | 2.242 | 8.98   |
| UBE1DC1 | 3.496 | 6.09   |
| UBE1L   | 3.488 | 51.32  |
| UBE1L2  | 5.367 | 3.54   |
| UBE2A   | 3.06  | 15.44  |
| UBE2B   | 2.631 | 8.42   |
| UBE2C   | 2.411 | 16.77  |
| UBE2CP1 | 0.774 | 5.55   |
| UBE2D1  | 2.651 | 2.57   |
| UBE2D2  | 3.581 | 26.98  |
| UBE2D3  | 5.709 | 30.31  |
| UBE2D4  | 2.796 | 1.81   |
| UBE2E1  | 1.466 | 52.46  |
| UBE2E2  | 1.51  | 9.65   |
| UBE2E3  | 1.737 | 11.54  |
| UBE2E4P | 1.159 | 4.73   |
| UBE2F   | 1.542 | 13.55  |
| UBE2G1  | 4.332 | 12.07  |
| UBE2G2  | 3.189 | 23.35  |
| UBE2H   | 7.986 | 9.6    |
| UBE2I   | 2.891 | 33.94  |
| UBE2J1  | 4.342 | 17.42  |
| UBE2J2  | 2.609 | 19.76  |
| UBE2L3  | 5.536 | 17.79  |
| UBE2L4  | 0.464 | 0      |
| UBE2L6  | 1.579 | 65.3   |
| UBE2L7P | 0.683 | 10.73  |
| UBE2M   | 1.516 | 43.4   |
| UBE2MP1 | 0.961 | 12.45  |
| UBE2N   | 2.552 | 23.97  |
| UBE2NL  | 1.19  | 2.19   |
| UBE2O   | 5.319 | 17.68  |
| UBE2Q1  | 3.221 | 31.54  |
| UBE2Q2  | 2.922 | 4.81   |

|          |        |        |
|----------|--------|--------|
| UBE2R2   | 4.457  | 9.62   |
| UBE2S    | 0.881  | 36.81  |
| UBE2SP1  | 0.881  | 10.52  |
| UBE2T    | 0.898  | 14.26  |
| UBE2U    | 1.136  | 0      |
| UBE2V1   | 3.173  | 24.02  |
| UBE2V1P1 | 0.421  | 1      |
| UBE2V2   | 1.524  | 10.72  |
| UBE2W    | 7.706  | 0.84   |
| UBE2Z    | 2.99   | 34.46  |
| UBE3A    | 5.239  | 7.57   |
| UBE3AP1  | 0.537  | 0      |
| UBE3AP2  | 3.149  | 0.91   |
| UBE3B    | 5.861  | 6.99   |
| UBE3C    | 10.336 | 3.69   |
| UBE4A    | 6.122  | 4.7    |
| UBE4B    | 5.491  | 10.88  |
| UBFD1    | 4.931  | 11.79  |
| UBIAD1   | 1.655  | 11.96  |
| UBL3     | 3.926  | 5.73   |
| UBL4A    | 2.305  | 12.5   |
| UBL4B    | 1.508  | 0      |
| UBL5     | 0.467  | 103.18 |
| UBL7     | 1.499  | 54.28  |
| UBLCP1   | 2.174  | 3.95   |
| UBN1     | 6.338  | 9.08   |
| UBOX5    | 4.329  | 3.4    |
| UBP1     | 4.145  | 10.34  |
| UBQLN1   | 4.581  | 17.67  |
| UBQLN2   | 3.306  | 9.96   |
| UBQLN3   | 2.345  | 0      |
| UBQLN4   | 3.507  | 22.38  |
| UBQLN4P  | 3.574  | 5.07   |
| UBQLNL   | 2.303  | 0.19   |
| UBR1     | 7.748  | 1.94   |
| UBR2     | 5.268  | 3.72   |
| UBTD1    | 1.557  | 4.66   |
| UBTD2    | 1.113  | 7.65   |
| UBTF     | 4.488  | 49.7   |
| UBXD1    | 1.896  | 38.08  |
| UBXD2    | 3.828  | 16.5   |
| UBXD3    | 2.972  | 1.59   |
| UBXD4    | 1.896  | 3.42   |
| UBXD5    | 2.287  | 9.65   |
| UBXD6    | 1.441  | 5.03   |
| UBXD7    | 6.142  | 4.59   |
| UBXD8    | 4.492  | 13.69  |
| UCHL1    | 1.093  | 0      |
| UCHL3    | 0.844  | 9.78   |
| UCHL5    | 1.703  | 4.84   |

|          |       |        |
|----------|-------|--------|
| UHL5IP   | 1.891 | 7.04   |
| UCK1     | 2.164 | 11.17  |
| UCK2     | 2.671 | 11.76  |
| UCKL1    | 1.833 | 21.83  |
| UCN      | 0.615 | 3.7    |
| UCN2     | 1.485 | 0      |
| UCN3     | 0.71  | 0      |
| UCP1     | 1.048 | 0      |
| UCP2     | 1.646 | 195.95 |
| UCP3     | 2.59  | 0.23   |
| UCRC     | 1.861 | 27.02  |
| UEVLD    | 1.966 | 0.82   |
| UFC1     | 1.107 | 133.47 |
| UFD1L    | 1.534 | 14.83  |
| UFM1     | 2.522 | 12.33  |
| UGCG     | 2.324 | 13.7   |
| UGCGL1   | 8.434 | 7.7    |
| UGCGL2   | 4.832 | 0.02   |
| UGDH     | 3.189 | 3.54   |
| UGP2     | 2.565 | 29.03  |
| UGT1A1   | 2.357 | 0      |
| UGT1A10  | 2.385 | 0      |
| UGT1A11P | 0.846 | 0      |
| UGT1A12P | 0.853 | 0      |
| UGT1A13P | 1.098 | 0      |
| UGT1A2P  | 1.433 | 0      |
| UGT1A3   | 2.345 | 0      |
| UGT1A4   | 2.374 | 0      |
| UGT1A5   | 2.345 | 0      |
| UGT1A6   | 2.648 | 0      |
| UGT1A7   | 2.333 | 0      |
| UGT1A8   | 2.396 | 0      |
| UGT1A9   | 2.376 | 0      |
| UGT2A1   | 1.764 | 0      |
| UGT2A3   | 2.974 | 0      |
| UGT2B10  | 1.619 | 0      |
| UGT2B11  | 1.722 | 0      |
| UGT2B15  | 2.091 | 0      |
| UGT2B17  | 2.077 | 0      |
| UGT2B24P | 1.023 | 0      |
| UGT2B25P | 0.899 | 0      |
| UGT2B26P | 0.888 | 0      |
| UGT2B27P | 1.008 | 0      |
| UGT2B28  | 1.833 | 0      |
| UGT2B29P | 1.021 | 0      |
| UGT2B4   | 2.092 | 0      |
| UGT2B7   | 1.854 | 0      |
| UGT3A1   | 2.823 | 0      |
| UGT3A2   | 2.341 | 15.22  |
| UGT8     | 2.448 | 0      |



|         |        |        |
|---------|--------|--------|
| UHMK1   | 4.064  | 5.72   |
| UHRF1   | 3.816  | 89.4   |
| UHRF2   | 3.621  | 14.56  |
| UIMC1   | 2.604  | 11.39  |
| ULBP1   | 3.142  | 0      |
| ULBP2   | 1.349  | 0.56   |
| ULBP3   | 0.735  | 0      |
| ULK1    | 5.211  | 10.72  |
| ULK2    | 5.807  | 0.54   |
| ULK3    | 2.622  | 17.86  |
| ULK4    | 3.969  | 0.34   |
| UM9(5)  | 9.848  | 0      |
| UMOD    | 2.354  | 0      |
| UMODL1  | 5.889  | 0.13   |
| UMPS    | 2.246  | 9.22   |
| UNC119  | 2.523  | 16.56  |
| UNC13A  | 10.102 | 0.03   |
| UNC13B  | 6.3    | 4.47   |
| UNC13C  | 8.14   | 0      |
| UNC13D  | 4.361  | 5.45   |
| UNC45A  | 4.393  | 23.82  |
| UNC45B  | 5.821  | 0      |
| UNC50   | 2.172  | 4.93   |
| UNC5A   | 3.733  | 0      |
| UNC5B   | 3.916  | 0.04   |
| UNC5C   | 3.646  | 0      |
| UNC5CL  | 2.987  | 0.85   |
| UNC5D   | 7.002  | 0      |
| UNC84A  | 8.068  | 11.46  |
| UNC84B  | 3.908  | 133.92 |
| UNC93A  | 2.012  | 0      |
| UNC93B1 | 2.612  | 34.7   |
| UNCX4.1 | 1.596  | 0      |
| UNG     | 2.473  | 11.89  |
| UNGP1   | 1.032  | 0      |
| UNGP2   | 0.627  | 0      |
| UNGP3   | 2.252  | 0.11   |
| UNK     | 4.049  | 12.21  |
| UNKL    | 1.379  | 1.47   |
| UNQ1887 | 3.403  | 7.87   |
| UNQ1940 | 3.29   | 0      |
| UNQ1945 | 1.402  | 0      |
| UNQ2541 | 0.762  | 0      |
| UNQ2963 | 0.332  | 0      |
| UNQ338  | 0.95   | 0      |
| UNQ467  | 0.414  | 0      |
| UNQ473  | 0.853  | 0.1    |
| UNQ501  | 1.03   | 17.91  |
| UNQ5783 | 1.952  | 35.69  |
| UNQ5830 | 2.412  | 0      |

|         |       |        |
|---------|-------|--------|
| UNQ6125 | 1.513 | 0      |
| UNQ6190 | 1.568 | 0      |
| UNQ6411 | 1.386 | 0      |
| UNQ6490 | 1.018 | 0      |
| UNQ830  | 0.465 | 0      |
| UNQ846  | 1.448 | 0      |
| UNQ9217 | 1.529 | 0.05   |
| UNQ9368 | 0.751 | 0.67   |
| UNQ9370 | 1.983 | 0      |
| UNQ9391 | 1.099 | 0      |
| UNQ9433 | 1.07  | 0      |
| UNQ9438 | 0.622 | 0.68   |
| UPB1    | 2.067 | 3.09   |
| UPF1    | 5.345 | 12.58  |
| UPF2    | 6.554 | 7.37   |
| UPF3A   | 2.359 | 8.71   |
| UPF3B   | 2.381 | 10.37  |
| UPK1A   | 1.223 | 0      |
| UPK1B   | 2.058 | 0      |
| UPK2    | 0.916 | 0      |
| UPK3A   | 1.025 | 0      |
| UPK3B   | 4.674 | 0.02   |
| UPP1    | 4.215 | 0.62   |
| UPP2    | 2.221 | 0      |
| UPRT    | 2.147 | 5.41   |
| UQCR    | 1.266 | 46.44  |
| UQCRB   | 0.938 | 157.51 |
| UQCRC1  | 1.617 | 65.69  |
| UQCRC2  | 1.674 | 107.68 |
| UQCRFS1 | 1.202 | 55.78  |
| UQCRH   | 0.527 | 186.06 |
| UQCRO   | 0.731 | 48.51  |
| URG4    | 7.072 | 4.35   |
| URM1    | 1.326 | 46.7   |
| UROC1   | 3.127 | 0      |
| UROD    | 1.383 | 53.84  |
| UROS    | 1.279 | 64.8   |
| URP2    | 3.087 | 38.31  |
| USF1    | 2.077 | 31.07  |
| USF2    | 1.709 | 121.3  |
| USH1C   | 3.802 | 0      |
| USH1G   | 3.561 | 0      |
| USH2A   | 20.42 | 0      |
| USHBP1  | 2.41  | 0.14   |
| USMG5   | 0.553 | 34.88  |
| USP1    | 4.362 | 5.95   |
| USP10   | 2.995 | 13.02  |
| USP11   | 3.29  | 49.19  |
| USP12   | 2.352 | 2.76   |
| USP12P1 | 2.29  | 0.11   |

|         |        |       |
|---------|--------|-------|
| USP12P2 | 2.243  | 0.53  |
| USP12P3 | 2.243  | 0.15  |
| USP13   | 2.98   | 3.11  |
| USP14   | 4.156  | 5.59  |
| USP15   | 4.611  | 6.31  |
| USP16   | 3.223  | 5.07  |
| USP18   | 2.037  | 19.8  |
| USP19   | 4.771  | 15.82 |
| USP2    | 2.968  | 0.2   |
| USP20   | 5.956  | 5.01  |
| USP21   | 2.354  | 10.6  |
| USP22   | 6.496  | 34.45 |
| USP24   | 10.069 | 4.83  |
| USP25   | 4.968  | 3.9   |
| USP26   | 2.794  | 0     |
| USP27X  | 1.674  | 0.86  |
| USP28   | 4.632  | 9.73  |
| USP29   | 3.607  | 0     |
| USP3    | 2.33   | 4.3   |
| USP30   | 2.098  | 2.45  |
| USP31   | 4.059  | 0.43  |
| USP32   | 7.026  | 5.39  |
| USP33   | 4.913  | 2.73  |
| USP34   | 10.314 | 9.17  |
| USP35   | 5.359  | 1.51  |
| USP36   | 6.279  | 7.5   |
| USP37   | 7.997  | 0.84  |
| USP38   | 4.666  | 4.42  |
| USP39   | 2.209  | 28.26 |
| USP4    | 3.683  | 26.79 |
| USP40   | 3.957  | 4.17  |
| USP41   | 1.949  | 8.99  |
| USP42   | 10.187 | 1.39  |
| USP44   | 2.872  | 0     |
| USP45   | 6.99   | 0.25  |
| USP46   | 3.83   | 0.93  |
| USP47   | 7.777  | 4.66  |
| USP48   | 5.339  | 10.08 |
| USP49   | 3.177  | 0.31  |
| USP5    | 3.103  | 25.77 |
| USP50   | 1.02   | 0.58  |
| USP51   | 2.49   | 0.34  |
| USP52   | 4.489  | 11.09 |
| USP53   | 3.219  | 0.37  |
| USP54   | 5.018  | 1.84  |
| USP6    | 7.971  | 0.08  |
| USP6NL  | 4.927  | 4.27  |
| USP7    | 4.365  | 23.23 |
| USP8    | 4.243  | 6.17  |
| USP9X   | 12.614 | 8.4   |

|         |        |        |
|---------|--------|--------|
| USP9Y   | 10.04  | 1.55   |
| USP9YP1 | 3.339  | 0      |
| USP9YP2 | 3.339  | 0      |
| USPL1   | 3.814  | 2.8    |
| UST     | 4.197  | 2.63   |
| UTF1    | 1.157  | 2.4    |
| UTP11L  | 1.017  | 13.91  |
| UTP14A  | 2.488  | 14.46  |
| UTP14C  | 5.494  | 4.11   |
| UTP15   | 3.655  | 1.2    |
| UTP18   | 1.873  | 10.17  |
| UTP20   | 8.995  | 1.76   |
| UTP6    | 2.065  | 18.52  |
| UTRN    | 10.636 | 6.99   |
| UTS2    | 0.787  | 0      |
| UTS2D   | 1.279  | 0      |
| UTS2R   | 1.17   | 0.07   |
| UTX     | 5.423  | 2.42   |
| UTY     | 7.197  | 2.21   |
| UVRAG   | 3.515  | 3.69   |
| UXS1    | 2.084  | 31.04  |
| UXT     | 0.909  | 89.33  |
| VAC14   | 3.096  | 8.92   |
| VAMP1   | 6.047  | 3.79   |
| VAMP2   | 2.155  | 159.21 |
| VAMP3   | 2.205  | 13.72  |
| VAMP4   | 2.126  | 1.9    |
| VAMP5   | 0.665  | 199.76 |
| VAMP8   | 0.671  | 130.56 |
| VANGL1  | 8.691  | 2.54   |
| VANGL2  | 5.348  | 0.82   |
| VAPA    | 6.994  | 7.38   |
| VAPB    | 3.675  | 5.27   |
| VARS    | 10.677 | 9.62   |
| VARS2   | 12.21  | 0.1    |
| VASH1   | 5.728  | 21.77  |
| VASH2   | 3.572  | 0.66   |
| VASN    | 2.806  | 0.15   |
| VASP    | 3.328  | 28.98  |
| VAT1    | 2.694  | 32.49  |
| VAV1    | 2.888  | 31.32  |
| VAV2    | 4.693  | 2.31   |
| VAV3    | 4.757  | 18.87  |
| VAX1    | 4.494  | 0      |
| VAX2    | 1.147  | 0      |
| VBP1    | 1.779  | 11.41  |
| VCAM1   | 3.102  | 0.54   |
| VCAN    | 11.355 | 4.69   |
| VCL     | 5.49   | 16.34  |
| VCP     | 3.544  | 40.57  |

|          |        |        |
|----------|--------|--------|
| VCPIP1   | 8.176  | 1.78   |
| VCX      | 0.967  | 0      |
| VCX2     | 0.815  | 0      |
| VCX3A    | 0.995  | 0      |
| VCX-C    | 1.081  | 0      |
| VCY      | 0.551  | 0      |
| VCY1B    | 0.545  | 0      |
| VDAC1    | 1.806  | 56.86  |
| VDAC1LP  | 0.535  | 0.31   |
| VDAC2    | 1.503  | 25.33  |
| VDAC2P   | 1.084  | 0      |
| VDAC3    | 1.386  | 31.12  |
| VDAC5P   | 0.273  | 0      |
| VDP      | 3.891  | 10.33  |
| VDR      | 4.775  | 0.23   |
| VEGFA    | 7.706  | 0.26   |
| VEGFB    | 1.118  | 44.83  |
| VEGFC    | 2.079  | 0.12   |
| VENTX    | 2.411  | 7.34   |
| VENTXP1  | 2.716  | 0      |
| VENTXP2  | 0.481  | 0      |
| VENTXP3  | 2.035  | 0      |
| VENTXP4  | 1.463  | 0.12   |
| VENTXP5  | 1.909  | 0      |
| VENTXP6  | 1.157  | 0      |
| VENTXP7  | 0.983  | 0.43   |
| VEPH1    | 3.044  | 0.03   |
| VEZF1    | 4.914  | 16.21  |
| VEZT     | 3.942  | 8.51   |
| VGCNL1   | 6.923  | 0      |
| VGf      | 5.092  | 0      |
| VGLL1    | 1.212  | 0      |
| VGLL2    | 3.489  | 0      |
| VGLL3    | 10.396 | 0      |
| VGLL4    | 3.542  | 22.73  |
| VHL      | 2.968  | 20.83  |
| VHLL     | 0.676  | 0      |
| VIL1     | 2.694  | 0      |
| VIL2     | 3.065  | 65.27  |
| VILL     | 2.787  | 7.04   |
| VIM      | 1.847  | 195.51 |
| VIP      | 1.713  | 0      |
| VIPR1    | 2.772  | 0.21   |
| VIPR2    | 7.889  | 5.5    |
| VISA     | 4.914  | 11.73  |
| VIT      | 2.728  | 0      |
| VKORC1   | 1.487  | 47.3   |
| VKORC1L1 | 2.296  | 3.56   |
| VKORC1P1 | 0.793  | 1.06   |
| VKORC1P2 | 0.62   | 1.9    |

|        |        |         |
|--------|--------|---------|
| VLDLR  | 3.636  | 0.14    |
| VMAC   | 1.628  | 5.12    |
| VMO1   | 0.766  | 2.86    |
| VN1R1  | 1.313  | 0.71    |
| VN1R2  | 1.188  | 0       |
| VN1R3  | 1.269  | 0       |
| VN1R4  | 0.906  | 0       |
| VN1R5  | 1.074  | 0       |
| VN1R8P | 0.815  | 0       |
| VN1R9P | 1.723  | 0       |
| VN2R1P | 2.325  | 0       |
| VN2R9P | 26.192 | 0       |
| VNN1   | 3.106  | 0.65    |
| VNN2   | 2.17   | 5.24    |
| VNN3   | 2.638  | 0.03    |
| VPRBP  | 5.859  | 6.77    |
| VPREB1 | 0.641  | 1170.49 |
| VPREB3 | 0.545  | 436.79  |
| VPS11  | 3.222  | 19.45   |
| VPS13A | 12.551 | 1.13    |
| VPS13B | 14.938 | 1.37    |
| VPS13C | 15.672 | 3.61    |
| VPS13D | 16.329 | 3.67    |
| VPS16  | 3.227  | 8.64    |
| VPS18  | 3.895  | 15.19   |
| VPS24  | 3.526  | 11.85   |
| VPS25  | 1.101  | 34.65   |
| VPS26A | 4.408  | 3.8     |
| VPS26B | 3.669  | 52.09   |
| VPS28  | 1.802  | 50.06   |
| VPS29  | 1.101  | 30.07   |
| VPS33A | 2.603  | 7.16    |
| VPS33B | 2.49   | 4.33    |
| VPS35  | 3.233  | 17.51   |
| VPS36  | 4.423  | 9.2     |
| VPS37A | 2.02   | 5.05    |
| VPS37B | 2.742  | 25.47   |
| VPS37C | 2.692  | 2.97    |
| VPS37D | 4.072  | 0       |
| VPS39  | 4.832  | 16.33   |
| VPS41  | 11.376 | 2.08    |
| VPS45  | 2.817  | 11.3    |
| VPS4A  | 2.901  | 41.72   |
| VPS4B  | 3.38   | 8.28    |
| VPS52  | 8.853  | 0.09    |
| VPS53  | 2.453  | 4.39    |
| VPS54  | 4.2    | 3.91    |
| VPS72  | 1.324  | 41.93   |
| VPS8   | 5.009  | 3.78    |
| VRK1   | 1.703  | 12.02   |

|         |        |        |
|---------|--------|--------|
| VRK2    | 1.994  | 4.65   |
| VRK3    | 2.1    | 17.49  |
| VSIG1   | 3.128  | 0      |
| VSIG2   | 1.121  | 0      |
| VSIG4   | 1.77   | 0.48   |
| VSIG6   | 0.678  | 0      |
| VSIG8   | 1.818  | 0.04   |
| VSIG9   | 2.139  | 0.04   |
| VSNL1   | 2.005  | 0      |
| VSTM1   | 1.019  | 0.25   |
| VSTM2   | 6.556  | 0      |
| VSX1    | 2.336  | 0      |
| VTCN1   | 1.795  | 0      |
| VTI1A   | 1.738  | 1.26   |
| VTI1B   | 1.277  | 20.39  |
| VTN     | 1.678  | 0      |
| VWA1    | 3.7    | 7.76   |
| VWA2    | 3.634  | 24.97  |
| VWC2    | 3.806  | 0      |
| VWCE    | 3.292  | 6.02   |
| VWF     | 8.833  | 0.5    |
| VWFP    | 14.375 | 0.13   |
| WAC     | 4.488  | 26.58  |
| WAPAL   | 6.302  | 8.09   |
| WARS    | 3.182  | 15.72  |
| WARS2   | 4.971  | 1.45   |
| WAS     | 1.805  | 53.3   |
| WASF1   | 3.22   | 11.01  |
| WASF2   | 5.495  | 94.48  |
| WASF3   | 4.834  | 0.03   |
| WASL    | 8.844  | 0.42   |
| WBP1    | 1.165  | 35.79  |
| WBP11   | 2.674  | 29.68  |
| WBP2    | 1.857  | 49.35  |
| WBP2NL  | 2.255  | 0.08   |
| WBP4    | 2.333  | 3.39   |
| WBP5    | 1.156  | 3.43   |
| WBSCR16 | 4.756  | 5.67   |
| WBSCR17 | 6.498  | 0      |
| WBSCR18 | 5.068  | 3.31   |
| WBSCR19 | 5.3    | 0.25   |
| WBSCR22 | 2.46   | 15.54  |
| WBSCR23 | 5.236  | 17.7   |
| WBSCR27 | 1.862  | 0.45   |
| WBSCR28 | 1.7    | 0      |
| WDFY1   | 4.607  | 3.84   |
| WDFY2   | 1.873  | 9.04   |
| WDFY3   | 16.36  | 1.35   |
| WDHD1   | 4.846  | 1.88   |
| WDR1    | 3.143  | 164.48 |

|        |       |       |
|--------|-------|-------|
| WDR12  | 1.72  | 7.49  |
| WDR13  | 2.096 | 22.38 |
| WDR16  | 2.48  | 0.03  |
| WDR17  | 7.49  | 0     |
| WDR18  | 1.551 | 23.9  |
| WDR19  | 4.52  | 1.81  |
| WDR20  | 5.47  | 1.56  |
| WDR21A | 2.665 | 3.82  |
| WDR21B | 4.712 | 0.03  |
| WDR21C | 3.318 | 0     |
| WDR22  | 5.815 | 9.73  |
| WDR23  | 4.474 | 14.02 |
| WDR24  | 3.165 | 6.52  |
| WDR25  | 2.004 | 3.45  |
| WDR26  | 6.236 | 11.96 |
| WDR27  | 3.178 | 1.64  |
| WDR3   | 3.858 | 6.9   |
| WDR31  | 2.874 | 0.24  |
| WDR32  | 3.088 | 1.94  |
| WDR33  | 9.462 | 4.86  |
| WDR34  | 1.818 | 26.83 |
| WDR35  | 6.949 | 1.78  |
| WDR36  | 6.592 | 2.09  |
| WDR37  | 4.611 | 5.12  |
| WDR4   | 2.331 | 3.9   |
| WDR40A | 3.631 | 8.33  |
| WDR40B | 3.379 | 0     |
| WDR40C | 1.421 | 0     |
| WDR41  | 2.558 | 6.25  |
| WDR42A | 4.062 | 25.39 |
| WDR42B | 3.457 | 0.49  |
| WDR42C | 1.854 | 0.37  |
| WDR44  | 4.141 | 2.42  |
| WDR45  | 2.156 | 14.1  |
| WDR45L | 2.44  | 18.85 |
| WDR45p | 1.457 | 4.56  |
| WDR46  | 6.135 | 0.12  |
| WDR47  | 4.24  | 1.75  |
| WDR48  | 3.692 | 7.44  |
| WDR49  | 2.594 | 1.04  |
| WDR5   | 3.241 | 14.6  |
| WDR51A | 1.889 | 6.82  |
| WDR51B | 2.971 | 3.91  |
| WDR52  | 3.26  | 0.31  |
| WDR53  | 1.571 | 3.86  |
| WDR54  | 1.119 | 13.62 |
| WDR55  | 2.529 | 5.7   |
| WDR57  | 1.488 | 27.34 |
| WDR59  | 3.663 | 7.52  |
| WDR5B  | 4.183 | 1.07  |



|         |       |       |
|---------|-------|-------|
| WDR6    | 4.161 | 54.98 |
| WDR60   | 7.532 | 1.6   |
| WDR61   | 1.191 | 26.31 |
| WDR62   | 4.688 | 1.74  |
| WDR63   | 2.991 | 0     |
| WDR64   | 2.31  | 0.03  |
| WDR65   | 3.012 | 0.06  |
| WDR66   | 3.739 | 1.26  |
| WDR67   | 3.502 | 2.14  |
| WDR68   | 6.353 | 22.03 |
| WDR69   | 1.669 | 0     |
| WDR7    | 7.282 | 1.84  |
| WDR70   | 2.122 | 11.79 |
| WDR71   | 1.585 | 6.11  |
| WDR72   | 5.887 | 0     |
| WDR73   | 1.83  | 9.43  |
| WDR74   | 1.366 | 28.31 |
| WDR75   | 2.674 | 7.09  |
| WDR76   | 2.524 | 3     |
| WDR77   | 2.408 | 20.26 |
| WDR78   | 4.042 | 0.25  |
| WDR79   | 1.834 | 8.46  |
| WDR8    | 1.657 | 8.69  |
| WDR81   | 3.958 | 9.66  |
| WDR85   | 1.847 | 15.42 |
| WDR86   | 4.408 | 20.05 |
| WDR87   | 8.034 | 0     |
| WDR89   | 3.22  | 3.22  |
| WDR90   | 5.541 | 2.28  |
| WDSOF1  | 2.161 | 13.6  |
| WDSUB1  | 1.812 | 4.42  |
| WDTC1   | 4.275 | 27.8  |
| WEE1    | 4.231 | 3.01  |
| WFDC1   | 1.378 | 0     |
| WFDC10A | 0.482 | 0     |
| WFDC10B | 0.734 | 0     |
| WFDC11  | 0.615 | 0     |
| WFDC12  | 0.774 | 0     |
| WFDC13  | 1.372 | 0     |
| WFDC2   | 1.083 | 0.08  |
| WFDC3   | 1.186 | 0.14  |
| WFDC5   | 1.008 | 0     |
| WFDC6   | 0.619 | 0     |
| WFDC8   | 1.533 | 0     |
| WFDC9   | 0.659 | 0     |
| WFIKKN1 | 1.948 | 0     |
| WFIKKN2 | 3.519 | 0.03  |
| WFS1    | 3.64  | 28.65 |
| WHDC1   | 4.261 | 3.26  |
| WHDC1L1 | 1.996 | 0.72  |

|         |        |        |
|---------|--------|--------|
| WHDC1L2 | 1.889  | 0.66   |
| WHSC1   | 18.853 | 4.08   |
| WHSC1L1 | 7.053  | 7.21   |
| WHSC2   | 2.246  | 15.49  |
| WIBG    | 1.226  | 22.12  |
| WIF1    | 1.978  | 0      |
| WIPF1   | 4.819  | 105.48 |
| WIPF2   | 5.525  | 7.42   |
| WIPF3   | 6.482  | 0.02   |
| WIP11   | 1.886  | 3.08   |
| WIP12   | 10.438 | 7.85   |
| WISP1   | 2.898  | 0      |
| WISP2   | 1.404  | 0      |
| WISP3   | 2.064  | 0      |
| WIT1    | 1.962  | 2.32   |
| WIZ     | 6.066  | 9.32   |
| WNK1    | 7.708  | 14.87  |
| WNK2    | 6.834  | 0.01   |
| WNK3    | 7.835  | 0      |
| WNK4    | 4.131  | 0.02   |
| WNT1    | 2.367  | 0      |
| WNT10A  | 2.375  | 0.11   |
| WNT10B  | 2.271  | 0      |
| WNT11   | 1.927  | 0.04   |
| WNT16   | 6.456  | 0.02   |
| WNT2    | 4.62   | 0.09   |
| WNT2B   | 2.214  | 0.03   |
| WNT3    | 1.497  | 0.06   |
| WNT3A   | 2.932  | 0      |
| WNT4    | 1.595  | 0.05   |
| WNT5A   | 5.838  | 0      |
| WNT5B   | 3.27   | 0      |
| WNT6    | 1.7    | 0      |
| WNT7A   | 1.714  | 0.25   |
| WNT7B   | 2.231  | 0      |
| WNT8A   | 1.498  | 0      |
| WNT8B   | 2.112  | 0      |
| WNT9A   | 2.758  | 8.55   |
| WNT9B   | 1.464  | 0      |
| WRB     | 1.327  | 6.53   |
| WRN     | 5.746  | 1.26   |
| WRNIP1  | 2.819  | 22.09  |
| WSB1    | 2.832  | 12.79  |
| WSB2    | 2.822  | 21.88  |
| WT1     | 3.113  | 2.63   |
| WTAP    | 3.468  | 17.39  |
| WTIP    | 2.204  | 0.26   |
| WWC1    | 4.15   | 0.02   |
| WWC2    | 6.373  | 0.02   |
| WWC3    | 6.63   | 34.98  |

|         |        |        |
|---------|--------|--------|
| WVOX    | 1.695  | 2.93   |
| WWP1    | 4.108  | 2.73   |
| WWP2    | 6.766  | 7.02   |
| WWTR1   | 1.997  | 1.39   |
| XAB1    | 1.794  | 28.45  |
| XAB2    | 2.655  | 22.68  |
| XAF1    | 3.626  | 6.15   |
| XAGE1   | 1.486  | 0      |
| XAGE2   | 0.713  | 0      |
| XAGE3   | 0.549  | 0      |
| XAGE5   | 0.477  | 0      |
| XBP1    | 1.82   | 480.33 |
| XBPP1   | 1.541  | 2.24   |
| XCL1    | 1.222  | 0.07   |
| XCL2    | 0.552  | 0      |
| XCR1    | 1.373  | 0      |
| XDH     | 5.717  | 0      |
| XG      | 2.291  | 0.15   |
| XIST    | 19.271 | 0      |
| XK      | 5.085  | 0.15   |
| XKR3    | 1.615  | 0      |
| XKR4    | 3.913  | 1.85   |
| XKR5    | 4.894  | 0      |
| XKR6    | 3.761  | 0      |
| XKR7    | 2.91   | 0      |
| XKR8    | 2.514  | 8.01   |
| XKR9    | 3.174  | 0.03   |
| XKRX    | 2.846  | 0      |
| XKRY    | 1.581  | 0      |
| XKRY2   | 1.581  | 0      |
| XKRYP1  | 1.797  | 0      |
| XKRYP2  | 1.797  | 0      |
| XKRYP3  | 1.799  | 0      |
| XKRYP4  | 1.799  | 0      |
| XKRYP5  | 1.799  | 0      |
| XKRYP6  | 1.798  | 0      |
| XLKD1   | 2.413  | 7.5    |
| XPA     | 1.54   | 9.08   |
| XPC     | 3.691  | 12.08  |
| XPNPEP1 | 2.43   | 18.92  |
| XPNPEP2 | 3.333  | 3.24   |
| XPNPEP3 | 3.06   | 1.93   |
| XPO1    | 4.83   | 31.64  |
| XPO4    | 8.234  | 2.99   |
| XPO5    | 5.212  | 7.58   |
| XPO6    | 3.934  | 25.35  |
| XPO7    | 4.831  | 15.9   |
| XPOT    | 3.868  | 8.1    |
| XPOTP1  | 2.398  | 1.4    |
| XPR1    | 4.534  | 2.43   |

|                  |        |        |
|------------------|--------|--------|
| XRCC1            | 2.087  | 26.23  |
| XRCC2            | 6.145  | 0.21   |
| XRCC3            | 2.942  | 10.77  |
| XRCC4            | 1.934  | 1.09   |
| XRCC5            | 3.304  | 65.01  |
| XRCC6            | 2.133  | 128.07 |
| XRCC6BP1         | 1.442  | 3.21   |
| XRN1             | 10.092 | 1.5    |
| XRN2             | 3.435  | 21.14  |
| XRRA1            | 7.27   | 1.5    |
| XTP3TPA          | 1.12   | 31.51  |
| XX-2136C111.3    | 0.809  | 0.1    |
| XXbac-BCX216M5.7 | 0.466  | 0      |
| XYLB             | 3.694  | 0.43   |
| XYLT1            | 7.785  | 16.94  |
| XYLT2            | 3.567  | 9.64   |
| YAF2             | 7.991  | 0.71   |
| YAP1             | 5.092  | 0      |
| YARS             | 3.117  | 35.84  |
| YARS2            | 2.179  | 5.69   |
| YBX1             | 1.489  | 192.06 |
| YBX1P1           | 1.555  | 5.69   |
| YBX2             | 1.57   | 0      |
| YDD19            | 1.025  | 0.08   |
| YEATS2           | 6.501  | 5.97   |
| YEATS4           | 1.385  | 6.51   |
| YES1             | 4.685  | 0.9    |
| YESP             | 4.777  | 0.16   |
| YIF1A            | 1.055  | 26.75  |
| YIF1B            | 1.814  | 22.99  |
| YIPF1            | 1.804  | 12.05  |
| YIPF2            | 1.504  | 22.24  |
| YIPF3            | 1.55   | 64.24  |
| YIPF4            | 1.875  | 4.18   |
| YIPF5            | 3.115  | 2.97   |
| YIPF6            | 1.194  | 1.69   |
| YIPF7            | 1.239  | 0      |
| YKT6             | 5.532  | 13.46  |
| YLPM1            | 7.158  | 19.87  |
| YME1L1           | 4.221  | 16.36  |
| YME1L2           | 2.584  | 0      |
| YOD1             | 6.265  | 1.02   |
| YPEL1            | 4.285  | 6.92   |
| YPEL2            | 5.232  | 2.14   |
| YPEL3            | 1.588  | 61.27  |
| YPEL4            | 1.721  | 0.83   |
| YPEL5            | 2.181  | 44.14  |
| YRDC             | 1.836  | 7.89   |
| YSK4             | 4.165  | 0.02   |
| YTHDC1           | 6.249  | 15.13  |

|         |        |        |
|---------|--------|--------|
| YTHDC2  | 6.286  | 1.95   |
| YTHDF1  | 3.253  | 17.22  |
| YTHDF1P | 2.719  | 0.09   |
| YTHDF2  | 2.713  | 28.32  |
| YTHDF2P | 2.11   | 1.76   |
| YTHDF3  | 5.093  | 4.95   |
| YWHAB   | 3.105  | 82.47  |
| YWHAE   | 3.477  | 27.88  |
| YWHAG   | 7.426  | 15.96  |
| YWHAH   | 1.793  | 49.52  |
| YWHAQ   | 2.166  | 102.39 |
| YWHAQP  | 0.905  | 0      |
| YWHAQP2 | 1.035  | 0.57   |
| YWHAZ   | 3.177  | 44.99  |
| YWHAZP1 | 0.988  | 0      |
| YWHAZP3 | 2.758  | 1.04   |
| YWHAZP4 | 1.034  | 2.69   |
| YY1     | 4.908  | 22.98  |
| YY1AP1  | 3.991  | 20.86  |
| YY2     | 1.119  | 1.43   |
| ZADH1   | 2.538  | 3.92   |
| ZADH2   | 4.133  | 11.8   |
| ZAK     | 9.859  | 2.53   |
| ZAN     | 17.616 | 0.06   |
| ZAP70   | 2.736  | 7.23   |
| ZAR1    | 1.927  | 3.89   |
| ZBED1   | 4.507  | 15.18  |
| ZBED2   | 2.187  | 0      |
| ZBED3   | 2.465  | 12.41  |
| ZBED4   | 5.218  | 8.43   |
| ZBED5   | 2.642  | 9.41   |
| ZBP1    | 2.195  | 0.08   |
| ZBTB1   | 4.199  | 6.99   |
| ZBTB10  | 4.365  | 3.55   |
| ZBTB11  | 5.043  | 2.67   |
| ZBTB12  | 5.597  | 0      |
| ZBTB16  | 2.426  | 0.31   |
| ZBTB17  | 2.638  | 10.61  |
| ZBTB2   | 3.086  | 2.37   |
| ZBTB20  | 2.965  | 0.14   |
| ZBTB22  | 7.899  | 0.23   |
| ZBTB24  | 5.597  | 3.3    |
| ZBTB25  | 1.577  | 2.67   |
| ZBTB26  | 1.91   | 1.5    |
| ZBTB3   | 2.932  | 0.75   |
| ZBTB32  | 1.96   | 0.13   |
| ZBTB33  | 5.209  | 4.92   |
| ZBTB34  | 7.086  | 1.52   |
| ZBTB37  | 1.334  | 0.38   |
| ZBTB38  | 8.113  | 1.27   |

|          |        |       |
|----------|--------|-------|
| ZBTB39   | 6.17   | 1.73  |
| ZBTB4    | 5.879  | 9.24  |
| ZBTB40   | 7.211  | 3.99  |
| ZBTB41   | 8.474  | 0.39  |
| ZBTB43   | 2.906  | 0.58  |
| ZBTB44   | 3.844  | 6.51  |
| ZBTB45   | 2.352  | 5.27  |
| ZBTB46   | 4.376  | 0.81  |
| ZBTB47   | 4.2    | 2.67  |
| ZBTB48   | 2.289  | 11.85 |
| ZBTB5    | 4.627  | 1.42  |
| ZBTB6    | 4.112  | 0.68  |
| ZBTB7A   | 4.441  | 6.07  |
| ZBTB7B   | 2.126  | 4.87  |
| ZBTB7C   | 3.774  | 0.03  |
| ZBTB8    | 7.333  | 0.23  |
| ZBTB8OS  | 0.717  | 12.1  |
| ZBTB9    | 2.712  | 2.33  |
| ZC3H10   | 2.121  | 3.34  |
| ZC3H11A  | 7.982  | 6.88  |
| ZC3H12A  | 2.682  | 1.35  |
| ZC3H12B  | 7.006  | 0.2   |
| ZC3H12C  | 10.333 | 0.34  |
| ZC3H12D  | 2.39   | 8.32  |
| ZC3H13   | 6.594  | 16.52 |
| ZC3H14   | 5.312  | 6.53  |
| ZC3H15   | 2.128  | 18.24 |
| ZC3H3    | 3.253  | 11.21 |
| ZC3H6    | 4.792  | 0.44  |
| ZC3H7A   | 3.845  | 8.54  |
| ZC3H7B   | 5.868  | 29.67 |
| ZC3H8    | 1.59   | 5.83  |
| ZC3HAV1  | 15.944 | 6.76  |
| ZC3HAV1L | 3.506  | 0.53  |
| ZC3HC1   | 3.828  | 4.62  |
| ZCCHC10  | 2.122  | 3.77  |
| ZCCHC11  | 6.262  | 6.65  |
| ZCCHC12  | 2.197  | 0     |
| ZCCHC13  | 0.842  | 0     |
| ZCCHC14  | 6.911  | 2.95  |
| ZCCHC16  | 2.958  | 0     |
| ZCCHC17  | 1.602  | 13.98 |
| ZCCHC2   | 4.604  | 4.44  |
| ZCCHC23  | 1.951  | 0     |
| ZCCHC3   | 2.762  | 23.76 |
| ZCCHC4   | 4.203  | 1.34  |
| ZCCHC5   | 2.648  | 0.03  |
| ZCCHC6   | 5.647  | 4.21  |
| ZCCHC7   | 4.024  | 22.44 |
| ZCCHC8   | 2.864  | 7.73  |

|          |        |       |
|----------|--------|-------|
| ZCCHC9   | 4.606  | 2.87  |
| ZCD1     | 0.898  | 7.51  |
| ZCD1B    | 0.697  | 0.24  |
| ZCD2     | 1.583  | 7.77  |
| ZCRB1    | 1.844  | 12.47 |
| ZCWPW1   | 4.674  | 1.21  |
| ZCWPW2   | 1.658  | 0     |
| ZDHHC1   | 2.041  | 1.03  |
| ZDHHC11  | 2.604  | 0.49  |
| ZDHHC11B | 1.774  | 0.14  |
| ZDHHC12  | 1.152  | 34.08 |
| ZDHHC13  | 2.711  | 1.46  |
| ZDHHC14  | 3.141  | 0.94  |
| ZDHHC15  | 1.782  | 0.66  |
| ZDHHC16  | 2.189  | 15.05 |
| ZDHHC17  | 5.259  | 4.67  |
| ZDHHC18  | 3.136  | 10.85 |
| ZDHHC19  | 1.337  | 0     |
| ZDHHC2   | 3.817  | 3.9   |
| ZDHHC20  | 1.958  | 4.73  |
| ZDHHC21  | 3.205  | 0.84  |
| ZDHHC22  | 3.077  | 0     |
| ZDHHC23  | 3.778  | 0.62  |
| ZDHHC24  | 1.317  | 12.86 |
| ZDHHC3   | 2.72   | 14.74 |
| ZDHHC4   | 5.505  | 12.24 |
| ZDHHC5   | 4.56   | 20.65 |
| ZDHHC6   | 2.17   | 8.54  |
| ZDHHC7   | 3.157  | 16.51 |
| ZDHHC8   | 3.71   | 12.87 |
| ZDHHC9   | 3.168  | 7.95  |
| ZEB1     | 4.259  | 8.88  |
| ZEB2     | 5.56   | 6.8   |
| ZER1     | 4.554  | 15.98 |
| ZFAND1   | 1.793  | 8.83  |
| ZFAND2A  | 1.686  | 6.19  |
| ZFAND2B  | 1.291  | 16.51 |
| ZFAND3   | 3.005  | 36.07 |
| ZFAND5   | 2.424  | 22.38 |
| ZFAND6   | 1.68   | 8.08  |
| ZFAT1    | 8.024  | 2.45  |
| ZFHX2    | 5.675  | 0.2   |
| ZFHX4    | 12.103 | 0.02  |
| ZFP1     | 3.154  | 2.08  |
| ZFP106   | 10.457 | 5.4   |
| ZFP14    | 5.659  | 0.77  |
| ZFP161   | 2.896  | 4.04  |
| ZFP2     | 2.405  | 0.46  |
| ZFP28    | 4.087  | 0.93  |
| ZFP3     | 4.995  | 1.08  |

|            |        |       |
|------------|--------|-------|
| ZFP30      | 4.611  | 0.42  |
| ZFP36      | 1.745  | 60    |
| ZFP36L1    | 3.022  | 49.95 |
| ZFP36L2    | 3.306  | 96.34 |
| ZFP37      | 2.752  | 0.4   |
| ZFP41      | 4.786  | 1.86  |
| ZFP42      | 2.646  | 0.09  |
| ZFP57      | 5.94   | 0.02  |
| ZFP62      | 4.053  | 0     |
| ZFP64      | 5.218  | 2.49  |
| ZFP90      | 4.651  | 3.32  |
| ZFP91      | 5.155  | 11.34 |
| ZFP91-CNTF | 0.1    | 0     |
| ZFPL1      | 1.386  | 20.11 |
| ZFPM1      | 3.345  | 0.25  |
| ZFPM2      | 4.48   | 0     |
| ZFR        | 4.715  | 18.99 |
| ZFX        | 5.811  | 2.81  |
| ZFY        | 4.556  | 1.42  |
| ZFYVE1     | 4.577  | 5.11  |
| ZFYVE16    | 6.277  | 1.9   |
| ZFYVE19    | 1.784  | 9.96  |
| ZFYVE20    | 6.678  | 1.57  |
| ZFYVE21    | 1.383  | 6.15  |
| ZFYVE26    | 9.669  | 3.01  |
| ZFYVE27    | 3.113  | 16.72 |
| ZFYVE28    | 4.11   | 0.02  |
| ZFYVE9     | 5.19   | 2.3   |
| ZG16       | 0.609  | 0     |
| ZGPAT      | 3.797  | 10.16 |
| ZH2C2      | 1.731  | 0.93  |
| ZHX1       | 5.106  | 3.43  |
| ZHX2       | 4.359  | 26.53 |
| ZHX3       | 9.991  | 1.64  |
| ZIC1       | 5.231  | 0     |
| ZIC2       | 2.682  | 0.06  |
| ZIC3       | 3.939  | 0     |
| ZIC4       | 4.087  | 0     |
| ZIC5       | 2.421  | 0     |
| ZIK1       | 2.676  | 3.06  |
| ZIM2       | 2.083  | 0     |
| ZIM3       | 2.627  | 0     |
| ZKSCAN1    | 12.746 | 6.05  |
| ZKSCAN2    | 7.113  | 0.54  |
| ZKSCAN3    | 2.227  | 2.31  |
| ZKSCAN4    | 2.286  | 4.61  |
| ZKSCAN5    | 8.746  | 2.58  |
| ZMAT1      | 10.558 | 1.33  |
| ZMAT2      | 1.512  | 74.32 |
| ZMAT3      | 4.712  | 14.09 |



|          |        |       |
|----------|--------|-------|
| ZMAT4    | 2.465  | 0     |
| ZMAT5    | 1.033  | 20.22 |
| ZMIZ1    | 7.041  | 35.67 |
| ZMIZ2    | 11.002 | 7.97  |
| ZMPSTE24 | 3.103  | 7.27  |
| ZMYM1    | 4.205  | 0.76  |
| ZMYM2    | 5.217  | 7.22  |
| ZMYM3    | 5.585  | 15.67 |
| ZMYM4    | 6.994  | 7.68  |
| ZMYM5    | 1.872  | 1.26  |
| ZMYM6    | 3.095  | 6.36  |
| ZMYND10  | 1.773  | 0.24  |
| ZMYND11  | 4.544  | 10.62 |
| ZMYND12  | 1.67   | 0.86  |
| ZMYND15  | 2.274  | 0.19  |
| ZMYND17  | 2.423  | 0.7   |
| ZMYND19  | 1.37   | 14.27 |
| ZMYND8   | 4.958  | 18.86 |
| ZNF10    | 4.405  | 1.32  |
| ZNF100   | 5.638  | 1.27  |
| ZNF101   | 1.45   | 9.59  |
| ZNF114   | 2.206  | 0.95  |
| ZNF117   | 2.744  | 0.76  |
| ZNF12    | 5.622  | 1.47  |
| ZNF121   | 1.729  | 1.71  |
| ZNF124   | 1.674  | 0.76  |
| ZNF131   | 2.415  | 6.28  |
| ZNF132   | 3.03   | 0.37  |
| ZNF133   | 2.665  | 4.04  |
| ZNF134   | 3.538  | 3.52  |
| ZNF135   | 3.025  | 1.11  |
| ZNF136   | 2.971  | 2.3   |
| ZNF137   | 2.484  | 1.5   |
| ZNF138   | 4.46   | 1.07  |
| ZNF14    | 2.963  | 0.43  |
| ZNF140   | 3.067  | 2.58  |
| ZNF141   | 2.977  | 1.41  |
| ZNF142   | 6.234  | 5.27  |
| ZNF143   | 2.487  | 4.98  |
| ZNF146   | 3.18   | 16.1  |
| ZNF148   | 3.03   | 4.48  |
| ZNF154   | 1.59   | 3.34  |
| ZNF155   | 2.716  | 1.92  |
| ZNF157   | 2.008  | 0.04  |
| ZNF16    | 2.821  | 2.15  |
| ZNF160   | 4.98   | 3.72  |
| ZNF165   | 2.635  | 1.02  |
| ZNF167   | 3.976  | 0.36  |
| ZNF169   | 1.939  | 0.74  |
| ZNF17    | 2.524  | 1     |

|        |        |       |
|--------|--------|-------|
| ZNF174 | 3.15   | 2.59  |
| ZNF175 | 3.785  | 1.76  |
| ZNF177 | 1.835  | 2.3   |
| ZNF179 | 3.085  | 0     |
| ZNF18  | 2.767  | 1.77  |
| ZNF180 | 3.1    | 1.06  |
| ZNF181 | 3.591  | 1.45  |
| ZNF182 | 3.641  | 1.55  |
| ZNF184 | 3.078  | 2.46  |
| ZNF185 | 3.598  | 0.93  |
| ZNF187 | 3.65   | 2.56  |
| ZNF189 | 3.698  | 3.62  |
| ZNF19  | 2.644  | 0.29  |
| ZNF192 | 5.362  | 2.04  |
| ZNF193 | 1.637  | 4.16  |
| ZNF195 | 2.287  | 4.49  |
| ZNF197 | 6.409  | 1.83  |
| ZNF2   | 4.081  | 1.22  |
| ZNF20  | 2.317  | 1.46  |
| ZNF200 | 4.438  | 1.39  |
| ZNF202 | 4.055  | 3.31  |
| ZNF204 | 17.712 | 0     |
| ZNF205 | 2.017  | 4.3   |
| ZNF207 | 3.611  | 51.98 |
| ZNF208 | 3.504  | 0.03  |
| ZNF211 | 2.452  | 4.98  |
| ZNF212 | 5.551  | 1.25  |
| ZNF213 | 3.202  | 8.1   |
| ZNF214 | 2.623  | 0     |
| ZNF215 | 3.658  | 0     |
| ZNF217 | 5.635  | 14.62 |
| ZNF219 | 3.04   | 12.11 |
| ZNF22  | 2.552  | 28.68 |
| ZNF221 | 2.535  | 0.63  |
| ZNF222 | 1.594  | 1.74  |
| ZNF223 | 2.414  | 1.11  |
| ZNF224 | 2.466  | 3.52  |
| ZNF225 | 2.467  | 0.92  |
| ZNF226 | 3.538  | 2.81  |
| ZNF227 | 3.042  | 4.63  |
| ZNF228 | 3.656  | 0.48  |
| ZNF229 | 2.524  | 0     |
| ZNF23  | 3.243  | 1.4   |
| ZNF230 | 4.109  | 0.66  |
| ZNF232 | 2.078  | 2.8   |
| ZNF233 | 2.782  | 0.09  |
| ZNF234 | 2.357  | 1.61  |
| ZNF235 | 3.083  | 0.57  |
| ZNF236 | 8.124  | 1.22  |
| ZNF238 | 5.942  | 2.78  |

|         |        |       |
|---------|--------|-------|
| ZNF239  | 2.386  | 1.06  |
| ZNF24   | 2.731  | 9.75  |
| ZNF248  | 4.883  | 2.26  |
| ZNF25   | 3.736  | 1.42  |
| ZNF250  | 2.15   | 1.05  |
| ZNF251  | 2.519  | 1.37  |
| ZNF253  | 2.329  | 1.48  |
| ZNF254  | 1.59   | 1.43  |
| ZNF256  | 2.21   | 2.6   |
| ZNF257  | 2.18   | 0.2   |
| ZNF259  | 1.778  | 15.21 |
| ZNF26   | 3.059  | 3.47  |
| ZNF260  | 5.391  | 1.25  |
| ZNF263  | 3.286  | 9.59  |
| ZNF264  | 6.594  | 0.76  |
| ZNF266  | 3.601  | 8.77  |
| ZNF267  | 3.191  | 2.22  |
| ZNF268  | 2.57   | 0.85  |
| ZNF271  | 2.408  | 6.51  |
| ZNF273  | 7.502  | 0.16  |
| ZNF274  | 3.32   | 8.19  |
| ZNF275  | 5.408  | 3.08  |
| ZNF276  | 3.772  | 10.56 |
| ZNF277P | 3.564  | 3.14  |
| ZNF28   | 4.675  | 2.12  |
| ZNF281  | 3.521  | 3.08  |
| ZNF282  | 7.465  | 3.94  |
| ZNF284  | 2.208  | 0.84  |
| ZNF285A | 2.674  | 0.13  |
| ZNF285B | 16.758 | 0.03  |
| ZNF286A | 2.515  | 1.84  |
| ZNF287  | 3.152  | 0.61  |
| ZNF289  | 2.762  | 31.93 |
| ZNF291  | 4.674  | 1.64  |
| ZNF292  | 10.61  | 2.65  |
| ZNF294  | 7.703  | 2.06  |
| ZNF295  | 7.368  | 0.32  |
| ZNF299P | 1.468  | 0     |
| ZNF3    | 8.15   | 1.96  |
| ZNF30   | 2.583  | 1.37  |
| ZNF300  | 3.104  | 0.27  |
| ZNF302  | 2.795  | 4.1   |
| ZNF304  | 4.315  | 1.72  |
| ZNF311  | 8.094  | 0     |
| ZNF313  | 2.467  | 36.67 |
| ZNF317  | 4.051  | 7.17  |
| ZNF318  | 8.006  | 3.24  |
| ZNF319  | 4.22   | 4.01  |
| ZNF32   | 1.279  | 22.2  |
| ZNF320  | 6.145  | 2.59  |

|         |        |       |
|---------|--------|-------|
| ZNF322A | 2.692  | 0.81  |
| ZNF322B | 2.374  | 0.78  |
| ZNF323  | 5.621  | 0.73  |
| ZNF324  | 3      | 2.83  |
| ZNF324B | 2.995  | 1.69  |
| ZNF326  | 4.297  | 5.82  |
| ZNF329  | 3.413  | 2.1   |
| ZNF330  | 1.843  | 14.17 |
| ZNF331  | 5.042  | 1.07  |
| ZNF333  | 3.767  | 3.4   |
| ZNF334  | 3.809  | 0.2   |
| ZNF335  | 4.452  | 6.47  |
| ZNF337  | 3.197  | 13.6  |
| ZNF33A  | 5.249  | 2.25  |
| ZNF33B  | 5.958  | 1.33  |
| ZNF34   | 2.038  | 1.61  |
| ZNF341  | 3.316  | 1.37  |
| ZNF342  | 1.586  | 11.85 |
| ZNF343  | 3.632  | 3.15  |
| ZNF345  | 3.119  | 0.43  |
| ZNF346  | 3.086  | 3.65  |
| ZNF347  | 3.502  | 0.96  |
| ZNF35   | 2.62   | 0.74  |
| ZNF350  | 2.341  | 4.17  |
| ZNF354A | 2.555  | 3.13  |
| ZNF354B | 2.141  | 1.81  |
| ZNF354C | 2.377  | 0.81  |
| ZNF358  | 1.882  | 25.55 |
| ZNF364  | 2.22   | 9.22  |
| ZNF365  | 7.476  | 0     |
| ZNF366  | 2.77   | 0.03  |
| ZNF367  | 1.691  | 1.15  |
| ZNF37A  | 7.116  | 3.01  |
| ZNF37B  | 0.701  | 0.48  |
| ZNF381P | 1.134  | 0     |
| ZNF382  | 2.813  | 0.15  |
| ZNF383  | 1.694  | 1.5   |
| ZNF384  | 3.963  | 17.07 |
| ZNF385  | 2.404  | 15.56 |
| ZNF394  | 4.29   | 3.26  |
| ZNF395  | 4.802  | 21.86 |
| ZNF396  | 2.788  | 0     |
| ZNF397  | 1.42   | 2.67  |
| ZNF398  | 11.322 | 0.88  |
| ZNF402P | 3.496  | 0     |
| ZNF403  | 2.78   | 13.43 |
| ZNF404  | 1.709  | 0.59  |
| ZNF405P | 1.518  | 0     |
| ZNF407  | 3.48   | 1.16  |
| ZNF408  | 2.441  | 4.45  |

|        |        |       |
|--------|--------|-------|
| ZNF41  | 3.533  | 1.93  |
| ZNF410 | 2.178  | 11.45 |
| ZNF414 | 1.178  | 9.23  |
| ZNF415 | 2.27   | 0.26  |
| ZNF416 | 2.509  | 1.21  |
| ZNF417 | 3.597  | 1.57  |
| ZNF418 | 3.694  | 1.37  |
| ZNF419 | 2.309  | 2.22  |
| ZNF420 | 2.984  | 0.73  |
| ZNF423 | 5.002  | 24.27 |
| ZNF425 | 6.32   | 0.65  |
| ZNF426 | 2.318  | 2.25  |
| ZNF428 | 1.387  | 59.15 |
| ZNF429 | 1.897  | 1.47  |
| ZNF43  | 5.217  | 1.37  |
| ZNF430 | 2.649  | 1.3   |
| ZNF431 | 3.798  | 1.38  |
| ZNF432 | 2.573  | 1.61  |
| ZNF433 | 2.321  | 0.43  |
| ZNF434 | 3.027  | 4.87  |
| ZNF436 | 3.788  | 3.71  |
| ZNF438 | 3.144  | 1.31  |
| ZNF439 | 2.55   | 3.1   |
| ZNF44  | 3.715  | 1.16  |
| ZNF440 | 3.533  | 0.71  |
| ZNF441 | 2.828  | 0.12  |
| ZNF442 | 2.797  | 0.21  |
| ZNF443 | 2.562  | 1.94  |
| ZNF444 | 2.043  | 16.86 |
| ZNF445 | 9.105  | 3.32  |
| ZNF446 | 1.974  | 4.1   |
| ZNF449 | 4.034  | 0.46  |
| ZNF45  | 3.153  | 2.97  |
| ZNF451 | 5.305  | 3.72  |
| ZNF452 | 7.805  | 0.13  |
| ZNF454 | 2.3    | 0     |
| ZNF460 | 3.139  | 0.27  |
| ZNF461 | 3.192  | 0.26  |
| ZNF462 | 8.306  | 2.46  |
| ZNF467 | 4.739  | 18.86 |
| ZNF468 | 5.546  | 0.91  |
| ZNF469 | 13.203 | 0.04  |
| ZNF470 | 2.514  | 0.33  |
| ZNF471 | 4.967  | 0.02  |
| ZNF473 | 4.761  | 2.94  |
| ZNF474 | 1.957  | 0     |
| ZNF479 | 4.144  | 0     |
| ZNF480 | 4.717  | 2.5   |
| ZNF483 | 5.239  | 0.02  |
| ZNF484 | 3.248  | 0.54  |

|        |        |       |
|--------|--------|-------|
| ZNF485 | 2.052  | 1.84  |
| ZNF486 | 4.268  | 0.45  |
| ZNF487 | 1.266  | 0.47  |
| ZNF488 | 3.496  | 0     |
| ZNF490 | 6.345  | 1.73  |
| ZNF491 | 2.823  | 0.09  |
| ZNF492 | 3.573  | 0.07  |
| ZNF493 | 4.209  | 0.88  |
| ZNF496 | 3.552  | 6.71  |
| ZNF497 | 3.466  | 2.8   |
| ZNF498 | 9.454  | 2.16  |
| ZNF500 | 3.252  | 3.44  |
| ZNF501 | 3.063  | 0.93  |
| ZNF502 | 3.27   | 0.36  |
| ZNF503 | 2.787  | 0     |
| ZNF506 | 4.14   | 2.73  |
| ZNF507 | 7.585  | 1.05  |
| ZNF508 | 5.388  | 6.19  |
| ZNF509 | 2.885  | 1.22  |
| ZNF510 | 5.154  | 2.19  |
| ZNF511 | 1.08   | 15.91 |
| ZNF512 | 3.426  | 16.25 |
| ZNF513 | 2.136  | 9.9   |
| ZNF514 | 3.204  | 1.32  |
| ZNF516 | 8.822  | 0.96  |
| ZNF517 | 2.536  | 1.76  |
| ZNF518 | 7.282  | 2.14  |
| ZNF519 | 1.968  | 0.9   |
| ZNF521 | 4.87   | 1.4   |
| ZNF524 | 1.109  | 12.92 |
| ZNF525 | 3.902  | 0.58  |
| ZNF526 | 3.954  | 2.51  |
| ZNF528 | 3.978  | 1.8   |
| ZNF529 | 4.466  | 0.85  |
| ZNF530 | 2.959  | 0.91  |
| ZNF532 | 6.464  | 0     |
| ZNF533 | 3.123  | 0     |
| ZNF534 | 2.085  | 0     |
| ZNF536 | 4.935  | 0     |
| ZNF540 | 3.147  | 0.19  |
| ZNF541 | 2.944  | 0     |
| ZNF542 | 14.559 | 0.49  |
| ZNF543 | 3.659  | 0.62  |
| ZNF544 | 3.732  | 7.69  |
| ZNF545 | 2.616  | 1.74  |
| ZNF546 | 4.508  | 0.34  |
| ZNF547 | 2.776  | 0.67  |
| ZNF548 | 3.381  | 2.14  |
| ZNF549 | 3.969  | 1.89  |
| ZNF550 | 1.146  | 3.31  |

|         |        |       |
|---------|--------|-------|
| ZNF551  | 3.663  | 1.52  |
| ZNF552  | 2.07   | 1.71  |
| ZNF553  | 2.203  | 5.69  |
| ZNF554  | 2.486  | 1.96  |
| ZNF555  | 2.062  | 2.53  |
| ZNF556  | 1.632  | 0.2   |
| ZNF557  | 1.362  | 1.8   |
| ZNF558  | 3.014  | 2.29  |
| ZNF559  | 3.042  | 3.24  |
| ZNF560  | 2.865  | 0     |
| ZNF561  | 3.394  | 3.59  |
| ZNF562  | 5.523  | 2.15  |
| ZNF563  | 2.754  | 0.18  |
| ZNF564  | 2.553  | 2.48  |
| ZNF565  | 2.506  | 0.6   |
| ZNF566  | 2.643  | 0.71  |
| ZNF567  | 2.689  | 1.28  |
| ZNF568  | 3.774  | 0.74  |
| ZNF569  | 4.059  | 0.98  |
| ZNF57   | 1.935  | 3.79  |
| ZNF570  | 2.247  | 0.37  |
| ZNF571  | 2.276  | 0.48  |
| ZNF572  | 3.26   | 0.28  |
| ZNF573  | 2.501  | 0.47  |
| ZNF574  | 3.601  | 5.82  |
| ZNF575  | 1.55   | 3.1   |
| ZNF576  | 1.468  | 4.02  |
| ZNF577  | 3.064  | 1.27  |
| ZNF578  | 1.723  | 0.05  |
| ZNF579  | 2.136  | 8.72  |
| ZNF580  | 1.589  | 27.57 |
| ZNF581  | 1.226  | 29.13 |
| ZNF582  | 2.297  | 0.7   |
| ZNF583  | 2.566  | 1.28  |
| ZNF584  | 2.261  | 1.86  |
| ZNF585A | 4.194  | 1.34  |
| ZNF585B | 2.971  | 1.05  |
| ZNF586  | 2.163  | 6.85  |
| ZNF587  | 3.553  | 2.68  |
| ZNF588  | 11.016 | 1.54  |
| ZNF589  | 2.374  | 2.38  |
| ZNF592  | 5.09   | 9.86  |
| ZNF593  | 0.621  | 25.64 |
| ZNF594  | 4.863  | 1.96  |
| ZNF595  | 2.86   | 0.71  |
| ZNF596  | 2.598  | 0.32  |
| ZNF597  | 1.773  | 0.86  |
| ZNF598  | 3.197  | 12.94 |
| ZNF599  | 4.707  | 0.89  |
| ZNF600  | 3.816  | 1.23  |

|         |        |       |
|---------|--------|-------|
| ZNF605  | 6.163  | 1.44  |
| ZNF606  | 4.226  | 1.26  |
| ZNF607  | 4.352  | 1.8   |
| ZNF608  | 5.645  | 12.28 |
| ZNF609  | 8.618  | 11.12 |
| ZNF610  | 1.855  | 1.09  |
| ZNF611  | 3.153  | 1.12  |
| ZNF613  | 2.625  | 1.5   |
| ZNF614  | 4.613  | 1.06  |
| ZNF615  | 4.033  | 0.85  |
| ZNF616  | 3.047  | 2.05  |
| ZNF618  | 2.992  | 0.96  |
| ZNF619  | 2.2    | 1.38  |
| ZNF620  | 2.102  | 0.52  |
| ZNF621  | 8.106  | 1.54  |
| ZNF622  | 1.692  | 10.65 |
| ZNF623  | 5.871  | 2.79  |
| ZNF624  | 4.232  | 0.54  |
| ZNF625  | 1.678  | 1.55  |
| ZNF626  | 1.126  | 0.53  |
| ZNF627  | 2.772  | 1.73  |
| ZNF628  | 3.843  | 3.95  |
| ZNF629  | 6.087  | 6.97  |
| ZNF630  | 2.561  | 0.42  |
| ZNF638  | 6.615  | 10.83 |
| ZNF639  | 3.013  | 4.97  |
| ZNF641  | 2.326  | 3.59  |
| ZNF642  | 2.159  | 1.91  |
| ZNF643  | 1.976  | 0.38  |
| ZNF644  | 5.888  | 1.83  |
| ZNF645  | 1.515  | 0     |
| ZNF646  | 6.458  | 6.12  |
| ZNF648  | 3.649  | 0     |
| ZNF649  | 3.169  | 1.33  |
| ZNF650  | 4.68   | 1.78  |
| ZNF652  | 6.29   | 3.23  |
| ZNF653  | 2.152  | 2.35  |
| ZNF654  | 2.152  | 2.15  |
| ZNF655  | 23.742 | 0.9   |
| ZNF658  | 3.966  | 0.06  |
| ZNF658B | 3.375  | 0     |
| ZNF659  | 1.655  | 0     |
| ZNF66   | 2.1    | 0.32  |
| ZNF660  | 2.205  | 0.69  |
| ZNF662  | 3.919  | 0     |
| ZNF664  | 5.108  | 8.52  |
| ZNF665  | 3.478  | 0.39  |
| ZNF667  | 3.326  | 0     |
| ZNF668  | 2.625  | 12.83 |
| ZNF669  | 1.905  | 2.3   |



|         |        |       |
|---------|--------|-------|
| ZNF670  | 2.005  | 0.8   |
| ZNF671  | 2.422  | 7.44  |
| ZNF672  | 2.936  | 32.85 |
| ZNF673  | 2.292  | 7.28  |
| ZNF674  | 2.689  | 0.66  |
| ZNF675  | 1.87   | 3.11  |
| ZNF676  | 2.091  | 0.04  |
| ZNF677  | 3.493  | 0.31  |
| ZNF678  | 2.525  | 0.7   |
| ZNF679  | 2.776  | 0     |
| ZNF680  | 6.052  | 0.76  |
| ZNF681  | 2.132  | 1.27  |
| ZNF682  | 1.495  | 1.13  |
| ZNF683  | 1.71   | 0.39  |
| ZNF684  | 2.094  | 0.88  |
| ZNF687  | 4.508  | 11.21 |
| ZNF688  | 2.125  | 3.25  |
| ZNF689  | 2.722  | 2.75  |
| ZNF69   | 1.438  | 1.29  |
| ZNF691  | 1.577  | 3.79  |
| ZNF692  | 1.931  | 11    |
| ZNF695  | 0.871  | 0.77  |
| ZNF696  | 2.691  | 1.34  |
| ZNF697  | 5.08   | 0.07  |
| ZNF7    | 2.353  | 5.23  |
| ZNF70   | 4.017  | 4.78  |
| ZNF700  | 2.865  | 2.56  |
| ZNF701  | 2.864  | 1.24  |
| ZNF702  | 2.996  | 0.5   |
| ZNF703  | 2.174  | 1.63  |
| ZNF704  | 4.303  | 1.84  |
| ZNF705A | 3.438  | 0     |
| ZNF705C | 26.169 | 0     |
| ZNF706  | 2.89   | 21.98 |
| ZNF707  | 2.218  | 3.15  |
| ZNF708  | 4.003  | 1.07  |
| ZNF709  | 2.154  | 0.66  |
| ZNF71   | 3.105  | 3.53  |
| ZNF710  | 3.316  | 4.67  |
| ZNF711  | 4.126  | 3.16  |
| ZNF713  | 4.13   | 0.25  |
| ZNF714  | 2.692  | 0.25  |
| ZNF716  | 2.601  | 0     |
| ZNF718  | 2.149  | 0.27  |
| ZNF720  | 2.707  | 3.67  |
| ZNF721  | 4.644  | 2.19  |
| ZNF724P | 64.181 | 0.29  |
| ZNF738  | 3.61   | 1.33  |
| ZNF74   | 3.758  | 5.11  |
| ZNF740  | 3.391  | 12.47 |

|         |       |       |
|---------|-------|-------|
| ZNF746  | 7.384 | 2.92  |
| ZNF747  | 2.529 | 4.99  |
| ZNF749  | 2.076 | 0.57  |
| ZNF75   | 5.538 | 1.63  |
| ZNF750  | 3.158 | 0.05  |
| ZNF75A  | 2.071 | 7.53  |
| ZNF75B  | 2.543 | 0.07  |
| ZNF76   | 2.653 | 10.13 |
| ZNF761  | 3.681 | 3.06  |
| ZNF763  | 2.639 | 0.32  |
| ZNF764  | 2.738 | 2.31  |
| ZNF765  | 4.577 | 0.92  |
| ZNF766  | 2.975 | 3.65  |
| ZNF767  | 7.04  | 2.26  |
| ZNF768  | 2.312 | 24.56 |
| ZNF77   | 2.001 | 3.41  |
| ZNF770  | 5.403 | 4.29  |
| ZNF771  | 1.899 | 2.08  |
| ZNF772  | 5.419 | 1.51  |
| ZNF773  | 2.203 | 1.49  |
| ZNF774  | 1.773 | 0.24  |
| ZNF775  | 4.46  | 1.95  |
| ZNF776  | 4.936 | 3.26  |
| ZNF777  | 3.892 | 7.01  |
| ZNF778  | 2.915 | 0.66  |
| ZNF780A | 1.824 | 0.13  |
| ZNF780B | 2.502 | 1.92  |
| ZNF781  | 3.078 | 0.05  |
| ZNF782  | 3.313 | 0.76  |
| ZNF783  | 6.005 | 2.38  |
| ZNF784  | 3.73  | 11.29 |
| ZNF785  | 3.183 | 4.65  |
| ZNF786  | 6.679 | 0.83  |
| ZNF787  | 1.928 | 30.06 |
| ZNF788  | 2.106 | 1     |
| ZNF789  | 3.534 | 2.36  |
| ZNF79   | 2.077 | 3.29  |
| ZNF790  | 2.413 | 0.49  |
| ZNF791  | 2.474 | 0.95  |
| ZNF792  | 3.284 | 2.74  |
| ZNF793  | 2.412 | 0.14  |
| ZNF799  | 3.931 | 0.58  |
| ZNF8    | 2.21  | 1.75  |
| ZNF80   | 2.56  | 0     |
| ZNF800  | 8.444 | 0.68  |
| ZNF804A | 4.685 | 0     |
| ZNF804B | 9.176 | 0     |
| ZNF805  | 8.865 | 0.34  |
| ZNF808  | 1.147 | 0.58  |
| ZNF81   | 3.745 | 0.99  |

|         |       |       |
|---------|-------|-------|
| ZNF813  | 3.571 | 0.45  |
| ZNF815  | 2.73  | 0.8   |
| ZNF816A | 2.697 | 1.03  |
| ZNF818  | 2.379 | 2.62  |
| ZNF83   | 2.633 | 6.91  |
| ZNF84   | 3.467 | 4.13  |
| ZNF85   | 2.296 | 2.75  |
| ZNF91   | 3.838 | 3.18  |
| ZNF92   | 6.712 | 0.31  |
| ZNF93   | 2.423 | 0.73  |
| ZNF99   | 3.111 | 0.03  |
| ZNFX1   | 7.321 | 11.84 |
| ZNHIT1  | 2.378 | 23.42 |
| ZNHIT2  | 1.296 | 5.59  |
| ZNHIT3  | 1.366 | 12.27 |
| ZNHIT4  | 1.212 | 23.42 |
| ZNRD1   | 3.029 | 0.5   |
| ZNRF1   | 4.633 | 22.77 |
| ZNRF2   | 6.92  | 2.97  |
| ZNRF3   | 6.989 | 0.47  |
| ZNRF4   | 1.426 | 0     |
| ZP1     | 1.972 | 0     |
| ZP2     | 2.266 | 4.61  |
| ZP3     | 2.9   | 4.24  |
| ZP4     | 1.635 | 0     |
| ZPBP    | 2.662 | 2.31  |
| ZPBP2   | 2.257 | 0.08  |
| ZPLD1   | 3.619 | 0     |
| ZRANB1  | 2.709 | 6.25  |
| ZRANB2  | 4.765 | 8.47  |
| ZRANB3  | 3.698 | 1.14  |
| ZRF1    | 4.424 | 3.25  |
| ZRF1PS  | 4.028 | 0.15  |
| ZRSR1   | 1.551 | 2.77  |
| ZRSR2   | 1.491 | 6.33  |
| ZSCAN1  | 2.054 | 0     |
| ZSCAN10 | 2.463 | 0.03  |
| ZSCAN12 | 3.911 | 1.42  |
| ZSCAN16 | 1.276 | 3.03  |
| ZSCAN18 | 2.779 | 11.37 |
| ZSCAN2  | 4.406 | 4.38  |
| ZSCAN20 | 3.997 | 0.3   |
| ZSCAN21 | 3.978 | 1.69  |
| ZSCAN22 | 4.629 | 0.76  |
| ZSCAN29 | 2.77  | 4.29  |
| ZSCAN4  | 2.231 | 0.15  |
| ZSCAN5  | 1.922 | 0.96  |
| ZSWIM1  | 2.169 | 2.33  |
| ZSWIM2  | 2.446 | 0     |
| ZSWIM3  | 2.776 | 1.37  |

|        |        |       |
|--------|--------|-------|
| ZSWIM4 | 4.339  | 3.38  |
| ZSWIM5 | 6.157  | 0.05  |
| ZSWIM6 | 5.545  | 3.68  |
| ZUBR1  | 15.882 | 9.4   |
| ZW10   | 2.884  | 4.33  |
| ZWILCH | 3.079  | 2.35  |
| ZWINT  | 3.591  | 10.34 |
| ZXDA   | 2.871  | 0.94  |
| ZXDB   | 5.642  | 0.91  |
| ZXDC   | 2.473  | 4.8   |
| ZYG11A | 2.428  | 0     |
| ZYG11B | 6.404  | 1.24  |
| ZYX    | 4.636  | 13.76 |
| ZZEF1  | 11.395 | 4.62  |
| ZZZ3   | 4.325  | 3.95  |
