# Supplementary material for: Application of the whole-transcriptome shotgun sequencing approach to the study of Philadelphia-positive acute lymphoblastic leukemia
Source: PubMed Central journal article supplement — Blood Cancer J. 2012 Mar 9;2(3):e61–. doi: 10.1038/bcj.2012.6 (PMC3317525; doi:10.1038/bcj.2012.6), 2012-03-09
Supplement: bcj20126x12.pdf [file bcj20126x12.pdf]

## Supplemental Data 3

### Up-regulated genes

| Gene ID | Transcript length (bp) | Primary ALL RPKM | Relapse RPKM | Fold change | Fisher's exact test raw p-value |
|---------|------------------------|------------------|--------------|-------------|---------------------------------|
| 76P     | 3,087                  | 0.93             | 4.20         | 4.516129032 | 0                               |
| A2M     | 4,653                  | 4.04             | 13.74        | 3.400990099 | 0                               |
| AAAS    | 1,799                  | 6.38             | 24.35        | 3.81661442  | 0                               |
| AACS    | 3,234                  | 3.21             | 9.25         | 2.881619938 | 0                               |
| AAMP    | 1,792                  | 13.47            | 43.15        | 3.203414996 | 0                               |
| AARS    | 3,344                  | 3.05             | 34.11        | 11.18360656 | 0                               |
| AARS2   | 4,073                  | 1.95             | 6.66         | 3.415384615 | 0                               |
| AARSD1  | 1.79                   | 7.30             | 15.53        | 2.12739726  | 2.20E-14                        |
| AASDH   | 3,562                  | 0.89             | 3.14         | 3.528089888 | 1.67E-12                        |
| AATF    | 2,141                  | 8.04             | 33.52        | 4.169154229 | 0                               |
| ABCA9   | 6,301                  | 1.20             | 4.37         | 3.641666667 | 0                               |
| ABCB6   | 2,972                  | 0.40             | 3.35         | 8.375       | 0                               |
| ABCB9   | 6,199                  | 0.36             | 1.24         | 3.444444444 | 6.34E-09                        |
| ABCC4   | 5,833                  | 1.17             | 6.15         | 5.256410256 | 0                               |
| ABCC5   | 7,062                  | 1.32             | 3.08         | 2.333333333 | 1.21E-13                        |
| ABCE1   | 3,524                  | 3.98             | 10.59        | 2.66080402  | 0                               |
| ABCF2   | 7,904                  | 1.66             | 7.97         | 4.801204819 | 0                               |
| ABCG1   | 5,055                  | 3.13             | 16.47        | 5.261980831 | 0                               |
| ABHD12  | 1,917                  | 4.08             | 12.25        | 3.00245098  | 0                               |
| ABHD14A | 1,062                  | 1.68             | 15.78        | 9.392857143 | 0                               |
| ABHD14B | 1,816                  | 37.43            | 78.07        | 2.085760085 | 0                               |
| ABHD4   | 2,509                  | 4.10             | 9.43         | 2.3         | 3.80E-14                        |
| ABHD8   | 2,041                  | 3.06             | 12.34        | 4.032679739 | 0                               |
| ABI3    | 2,109                  | 2.53             | 7.31         | 2.889328063 | 8.70E-14                        |
| ACAA2   | 1,584                  | 8.93             | 32.76        | 3.668533035 | 0                               |
| ACAD10  | 3,959                  | 2.98             | 8.51         | 2.855704698 | 0                               |
| ACAD9   | 2,454                  | 2.94             | 12.74        | 4.333333333 | 0                               |
| ACADM   | 2,192                  | 1.80             | 19.44        | 10.8        | 0                               |
| ACAT1   | 1,518                  | 7.69             | 24.52        | 3.188556567 | 0                               |
| ACAT2   | 1,455                  | 1.84             | 7.24         | 3.934782609 | 3.31E-13                        |
| ACBD6   | 1.06                   | 7.19             | 17.53        | 2.438108484 | 1.42E-12                        |
| ACD     | 2,034                  | 3.36             | 14.50        | 4.31547619  | 0                               |

|         |       |        |        |             |          |
|---------|-------|--------|--------|-------------|----------|
| ACLY    | 4,353 | 6.75   | 37.68  | 5.582222222 | 0        |
| ACO1    | 3,497 | 0.62   | 3.37   | 5.435483871 | 0        |
| ACO2    | 2,926 | 17.71  | 48.62  | 2.745341615 | 0        |
| ACOT7   | 2,389 | 2.15   | 7.01   | 3.260465116 | 0        |
| ACOT8   | 1,618 | 4.46   | 12.02  | 2.695067265 | 2.00E-15 |
| ACOX1   | 7,675 | 2.77   | 5.91   | 2.133574007 | 0        |
| ACOX3   | 2,411 | 0.99   | 5.03   | 5.080808081 | 0        |
| ACSL3   | 4,361 | 2.50   | 7.61   | 3.044       | 0        |
| ACSL5   | 3,929 | 2.87   | 22.17  | 7.724738676 | 0        |
| ACSS2   | 3,221 | 3.35   | 11.24  | 3.355223881 | 0        |
| ACTB    | 4,228 | 204.10 | 864.74 | 4.236844684 | 0        |
| ACTBP2  | 1.78  | 37.13  | 102.74 | 2.767034743 | 0        |
| ACTL6A  | 2,335 | 1.99   | 14.43  | 7.251256281 | 0        |
| ACTN1   | 3,994 | 19.55  | 45.69  | 2.337084399 | 0        |
| ACTN4   | 4,125 | 48.16  | 165.27 | 3.431686047 | 0        |
| ACTR2   | 3,861 | 33.93  | 72.02  | 2.122605364 | 0        |
| ACTR3   | 3,212 | 15.22  | 41.16  | 2.704336399 | 0        |
| ACVR1   | 2,951 | 0.77   | 3.25   | 4.220779221 | 1.26E-12 |
| ACY1    | 1,415 | 3.00   | 11.25  | 3.75        | 0        |
| ACY3    | 1.3   | 11.79  | 28.12  | 2.385072095 | 0        |
| ACYP1   | 1,129 | 1.57   | 11.27  | 7.178343949 | 0        |
| ACYP2   | 1,068 | 1.30   | 6.08   | 4.676923077 | 1.07E-09 |
| ADA     | 1,532 | 38.04  | 106.28 | 2.793901157 | 0        |
| ADCK1   | 2,183 | 1.32   | 4.55   | 3.446969697 | 5.86E-11 |
| ADCK2   | 4,728 | 1.32   | 5.88   | 4.454545455 | 0        |
| ADCK4   | 2,253 | 3.08   | 6.73   | 2.185064935 | 7.77E-09 |
| ADCY4   | 3,292 | 0.48   | 2.36   | 4.916666667 | 9.71E-12 |
| ADCY5   | 3,842 | 0.00   | 6.47   | 6.47        | 0        |
| ADCY9   | 7,725 | 2.10   | 5.35   | 2.547619048 | 0        |
| ADFP    | 1.98  | 44.42  | 103.89 | 2.338811346 | 0        |
| ADH5    | 2,644 | 5.42   | 14.68  | 2.708487085 | 0        |
| ADI1    | 1,627 | 8.33   | 29.67  | 3.56182473  | 0        |
| ADRA1B  | 2,368 | 1.30   | 27.04  | 20.8        | 0        |
| ADSL    | 1,681 | 13.78  | 36.33  | 2.636429608 | 0        |
| AEBP1   | 8,161 | 3.04   | 31.04  | 10.21052632 | 0        |
| AFAP1L1 | 4,153 | 3.02   | 20.99  | 6.950331126 | 0        |
| AFARP1  | 1,324 | 0.52   | 4.58   | 8.807692308 | 9.15E-13 |

|           |        |       |        |             |          |
|-----------|--------|-------|--------|-------------|----------|
| AFF2      | 13,746 | 0.35  | 0.99   | 2.828571429 | 7.10E-12 |
| AFF3      | 8,213  | 5.03  | 10.25  | 2.03777336  | 0        |
| AFG3L2    | 2,963  | 6.38  | 13.27  | 2.079937304 | 0        |
| AFMID     | 1.7    | 1.28  | 7.78   | 6.078125    | 0        |
| AGGF1     | 4,466  | 1.86  | 4.41   | 2.370967742 | 1.44E-12 |
| AGPAT2    | 1,548  | 13.87 | 28.03  | 2.020908435 | 0        |
| AGPAT3    | 6,609  | 2.41  | 7.43   | 3.082987552 | 0        |
| AGPAT7    | 1,908  | 4.52  | 14.66  | 3.243362832 | 0        |
| AGTRAP    | 3,041  | 1.79  | 11.63  | 6.497206704 | 0        |
| AGXT2L2   | 2,826  | 8.65  | 23.04  | 2.663583815 | 0        |
| AHCY      | 2.11   | 55.70 | 116.25 | 2.087073609 | 0        |
| AHCYL1    | 3,088  | 6.15  | 20.04  | 3.258536585 | 0        |
| AHSA1     | 1,371  | 12.56 | 87.49  | 6.965764331 | 0        |
| AIFM1     | 2,346  | 3.12  | 14.50  | 4.647435897 | 0        |
| AIP       | 1,212  | 29.96 | 79.58  | 2.656208278 | 0        |
| AK1       | 2,277  | 7.25  | 33.66  | 4.642758621 | 0        |
| AK2       | 4,069  | 6.27  | 46.05  | 7.344497608 | 0        |
| AK2B      | 1,978  | 1.60  | 17.00  | 10.625      | 0        |
| AKAP1     | 3,799  | 1.82  | 11.27  | 6.192307692 | 0        |
| AKNA      | 5,378  | 23.35 | 64.49  | 2.761884368 | 0        |
| AKR1A1    | 1,535  | 23.53 | 77.54  | 3.295367616 | 0        |
| AKR7A2    | 1,362  | 6.25  | 33.46  | 5.3536      | 0        |
| AKT1      | 3,333  | 12.03 | 30.02  | 2.495428096 | 0        |
| ALAD      | 3.54   | 2.40  | 12.97  | 5.404166667 | 0        |
| ALAS1     | 2,563  | 4.94  | 12.16  | 2.461538462 | 0        |
| ALAS2     | 2,367  | 6.11  | 14.06  | 2.301145663 | 0        |
| ALDH16A1  | 2,607  | 8.54  | 17.64  | 2.06557377  | 0        |
| ALDH18A1  | 3,616  | 1.88  | 20.11  | 10.69680851 | 0        |
| ALDH4A1   | 3.56   | 0.81  | 5.58   | 6.888888889 | 0        |
| ALDH6A1   | 2,183  | 0.59  | 4.01   | 6.796610169 | 1.00E-15 |
| ALDH7A1   | 1,882  | 5.04  | 16.07  | 3.188492063 | 0        |
| ALDH7A1P1 | 1,816  | 3.27  | 10.81  | 3.305810398 | 0        |
| ALDH9A1   | 2,696  | 2.90  | 11.18  | 3.855172414 | 0        |
| ALDOA     | 2,736  | 71.31 | 234.08 | 3.282569065 | 0        |
| ALDOAP1   | 1.97   | 2.06  | 7.83   | 3.800970874 | 0        |
| ALDOAP2   | 1,076  | 8.46  | 48.62  | 5.747044917 | 0        |
| ALDOC     | 1,651  | 0.84  | 19.90  | 23.69047619 | 0        |

|          |        |       |        |             |          |
|----------|--------|-------|--------|-------------|----------|
| ALG1     | 2,132  | 0.60  | 7.00   | 11.66666667 | 0        |
| ALG3     | 1.52   | 3.32  | 33.81  | 10.18373494 | 0        |
| ALG8     | 1,997  | 1.14  | 9.49   | 8.324561404 | 0        |
| ALKBH3   | 1,519  | 5.21  | 10.93  | 2.097888676 | 7.37E-09 |
| ALKBH5   | 2,963  | 16.50 | 41.90  | 2.539393939 | 0        |
| AMACR    | 4,247  | 0.30  | 1.98   | 6.6         | 2.00E-15 |
| AMOT     | 6,514  | 1.05  | 2.47   | 2.352380952 | 1.34E-10 |
| AMPD3    | 5,396  | 0.46  | 2.84   | 6.173913043 | 0        |
| ANAPC11  | 2,156  | 5.64  | 19.66  | 3.485815603 | 0        |
| ANAPC13  | 1.17   | 7.02  | 14.91  | 2.123931624 | 1.85E-09 |
| ANAPC7   | 2,057  | 6.40  | 18.51  | 2.8921875   | 0        |
| ANGEL1   | 4,058  | 2.76  | 12.43  | 4.503623188 | 0        |
| ANGPTL2  | 3,572  | 0.00  | 6.34   | 6.34        | 0        |
| ANK1     | 12,022 | 0.14  | 0.76   | 5.428571429 | 1.80E-14 |
| ANKMY2   | 5      | 1.03  | 2.42   | 2.349514563 | 3.40E-08 |
| ANKRD13D | 2,219  | 8.29  | 17.34  | 2.091676719 | 0        |
| ANKRD15  | 8,075  | 0.51  | 2.48   | 4.862745098 | 0        |
| ANKRD16  | 2.49   | 1.00  | 6.16   | 6.16        | 0        |
| ANKRD27  | 4,423  | 1.50  | 3.54   | 2.36        | 3.51E-10 |
| ANKRD39  | 0.837  | 1.65  | 9.87   | 5.981818182 | 5.00E-14 |
| ANKRD41  | 2,907  | 0.65  | 3.25   | 5           | 2.30E-14 |
| ANKRD58  | 1,725  | 2.24  | 12.80  | 5.714285714 | 0        |
| ANKS6    | 7,147  | 0.25  | 2.77   | 11.08       | 0        |
| ANP32A   | 2,464  | 32.56 | 100.39 | 3.083230958 | 0        |
| ANP32E   | 3,269  | 5.11  | 15.72  | 3.076320939 | 0        |
| ANTXR2   | 3,864  | 10.91 | 45.32  | 4.153987168 | 0        |
| ANXA11   | 3,783  | 35.02 | 85.59  | 2.444031982 | 0        |
| ANXA4    | 1,957  | 2.22  | 19.45  | 8.761261261 | 0        |
| ANXA6    | 2,915  | 21.31 | 43.08  | 2.02158611  | 0        |
| AOF1     | 3,811  | 1.32  | 7.28   | 5.515151515 | 0        |
| AP1M1    | 2,284  | 8.80  | 37.88  | 4.304545455 | 0        |
| AP1S1    | 2,466  | 0.84  | 12.60  | 15          | 0        |
| AP2A1    | 3,499  | 12.98 | 27.13  | 2.090138675 | 0        |
| AP2B1    | 5,763  | 11.37 | 32.74  | 2.879507476 | 0        |
| AP2M1    | 2,172  | 62.32 | 202.47 | 3.248876765 | 0        |
| AP2S1    | 0.89   | 22.01 | 112.54 | 5.113130395 | 0        |
| APAF1    | 10,362 | 1.57  | 4.69   | 2.987261146 | 0        |

|           |       |        |        |             |          |
|-----------|-------|--------|--------|-------------|----------|
| APBA3     | 2,158 | 2.20   | 9.65   | 4.386363636 | 0        |
| APBB1IP   | 3,072 | 14.98  | 87.18  | 5.81975968  | 0        |
| APCDD1    | 2,558 | 2.36   | 13.96  | 5.915254237 | 0        |
| APEH      | 2,758 | 2.98   | 22.76  | 7.637583893 | 0        |
| APEX1     | 2,134 | 59.62  | 156.88 | 2.631331768 | 0        |
| APEX2     | 1,977 | 4.81   | 19.09  | 3.968814969 | 0        |
| API5      | 3,734 | 9.11   | 18.61  | 2.042810099 | 0        |
| APLP2     | 3,721 | 8.99   | 37.98  | 4.224694105 | 0        |
| APOA1BP   | 1,121 | 6.97   | 37.79  | 5.421807747 | 0        |
| APOBEC3C  | 1,127 | 5.18   | 34.53  | 6.666023166 | 0        |
| APOBEC3F  | 2,971 | 0.67   | 6.97   | 10.40298507 | 0        |
| APOBEC3G  | 1,708 | 4.35   | 23.47  | 5.395402299 | 0        |
| APOBEC3H  | 0.916 | 1.19   | 7.82   | 6.571428571 | 6.08E-13 |
| APOE      | 1.18  | 0.76   | 11.63  | 15.30263158 | 0        |
| APOL1     | 3,073 | 1.32   | 5.79   | 4.386363636 | 0        |
| APOL2     | 2,889 | 5.37   | 13.06  | 2.432029795 | 0        |
| APOL4     | 3,478 | 0.28   | 24.00  | 85.71428571 | 0        |
| APP       | 3,627 | 15.90  | 59.22  | 3.724528302 | 0        |
| APRT      | 1,301 | 38.79  | 149.85 | 3.863109049 | 0        |
| AQP1      | 5,508 | 0.23   | 3.13   | 13.60869565 | 0        |
| ARCN1     | 3,904 | 7.83   | 27.66  | 3.53256705  | 0        |
| ARD1A     | 0.882 | 24.68  | 61.79  | 2.503646677 | 0        |
| ARF3      | 3,595 | 22.49  | 97.12  | 4.318363717 | 0        |
| ARFRP1    | 1.74  | 5.57   | 20.62  | 3.701974865 | 0        |
| ARHGAP1   | 3,346 | 11.23  | 27.54  | 2.452359751 | 0        |
| ARHGAP10  | 3,056 | 2.20   | 5.98   | 2.718181818 | 2.30E-14 |
| ARHGAP11A | 6,021 | 0.94   | 4.15   | 4.414893617 | 0        |
| ARHGAP18  | 3,499 | 0.40   | 4.82   | 12.05       | 0        |
| ARHGAP19  | 5,463 | 1.38   | 7.19   | 5.210144928 | 0        |
| ARHGAP22  | 2,749 | 1.26   | 4.75   | 3.76984127  | 2.00E-15 |
| ARHGAP23  | 6,475 | 3.41   | 20.39  | 5.979472141 | 0        |
| ARHGAP30  | 5,412 | 11.11  | 37.51  | 3.376237624 | 0        |
| ARHGAP9   | 2,912 | 14.30  | 28.90  | 2.020979021 | 0        |
| ARHGDIB   | 1,216 | 368.33 | 837.72 | 2.274373524 | 0        |
| ARHGEF11  | 6,889 | 1.00   | 7.77   | 7.77        | 0        |
| ARHGEF3   | 3.56  | 3.42   | 11.69  | 3.418128655 | 0        |
| ARHGEF6   | 5,272 | 6.56   | 13.79  | 2.102134146 | 0        |

|         |        |       |        |             |          |
|---------|--------|-------|--------|-------------|----------|
| ARID3A  | 2,724  | 1.27  | 3.55   | 2.795275591 | 2.09E-08 |
| ARIH2   | 5,434  | 21.19 | 43.65  | 2.059933931 | 0        |
| ARL1    | 3,199  | 3.65  | 11.00  | 3.01369863  | 0        |
| ARL11   | 3.76   | 1.45  | 6.32   | 4.35862069  | 0        |
| ARL2    | 0.895  | 5.41  | 33.60  | 6.210720887 | 0        |
| ARL6IP1 | 2,264  | 21.46 | 55.88  | 2.603914259 | 0        |
| ARMC10  | 5,258  | 1.11  | 3.17   | 2.855855856 | 4.70E-14 |
| ARMC5   | 4,672  | 2.27  | 6.99   | 3.079295154 | 0        |
| ARMC6   | 2,289  | 3.72  | 25.76  | 6.924731183 | 0        |
| ARMC7   | 2,126  | 0.70  | 5.70   | 8.142857143 | 0        |
| ARMCX2  | 3,079  | 0.29  | 2.22   | 7.655172414 | 2.04E-13 |
| ARMET   | 0.875  | 12.67 | 77.98  | 6.154696133 | 0        |
| ARPC1A  | 3,186  | 4.88  | 12.74  | 2.610655738 | 0        |
| ARPC1B  | 3.04   | 15.10 | 45.74  | 3.029139073 | 0        |
| ARPC2   | 3,057  | 41.92 | 120.10 | 2.864980916 | 0        |
| ARPC3   | 1,412  | 46.46 | 134.36 | 2.891950065 | 0        |
| ARPC4   | 2,484  | 29.47 | 99.42  | 3.373600271 | 0        |
| ARPC5   | 1,982  | 12.53 | 51.55  | 4.114126097 | 0        |
| ARRB1   | 2.58   | 4.03  | 22.60  | 5.607940447 | 0        |
| ARRB2   | 2,388  | 42.26 | 87.35  | 2.066966398 | 0        |
| ARSD    | 6,319  | 1.58  | 7.78   | 4.924050633 | 0        |
| ARV1    | 1,445  | 0.89  | 9.03   | 10.14606742 | 0        |
| ASB1    | 6,833  | 0.51  | 1.96   | 3.843137255 | 0        |
| ASCIZ   | 4,866  | 2.64  | 6.40   | 2.424242424 | 0        |
| ASF1B   | 1,731  | 1.60  | 20.15  | 12.59375    | 0        |
| ASH2L   | 2.36   | 7.63  | 25.48  | 3.339449541 | 0        |
| ASNA1   | 1.28   | 14.53 | 61.07  | 4.203028217 | 0        |
| ASPM    | 10,434 | 0.37  | 1.83   | 4.945945946 | 0        |
| ASPSCR1 | 1,843  | 4.30  | 9.87   | 2.295348837 | 3.59E-11 |
| ASXL2   | 7,216  | 1.21  | 3.82   | 3.157024793 | 0        |
| ATAD3A  | 2,611  | 2.46  | 8.52   | 3.463414634 | 0        |
| ATF1    | 1,551  | 1.59  | 10.70  | 6.729559748 | 0        |
| ATF5    | 2,008  | 5.27  | 13.26  | 2.516129032 | 0        |
| ATG4C   | 1,901  | 0.47  | 4.12   | 8.765957447 | 0        |
| ATG7    | 2,362  | 1.55  | 4.38   | 2.825806452 | 3.61E-09 |
| ATIC    | 1.91   | 5.02  | 25.80  | 5.139442231 | 0        |
| ATOX1   | 0.489  | 11.73 | 50.82  | 4.332480818 | 0        |

|          |        |        |        |             |          |
|----------|--------|--------|--------|-------------|----------|
| ATP10A   | 6,947  | 8.20   | 32.42  | 3.953658537 | 0        |
| ATP10D   | 6.55   | 0.60   | 3.93   | 6.55        | 0        |
| ATP13A1  | 3,483  | 12.56  | 29.53  | 2.35111465  | 0        |
| ATP13A2  | 3.84   | 16.91  | 50.15  | 2.965700769 | 0        |
| ATP1A1   | 4.27   | 13.41  | 39.26  | 2.927665921 | 0        |
| ATP2B4   | 13,443 | 2.99   | 13.85  | 4.632107023 | 0        |
| ATP2C1   | 6,082  | 3.51   | 7.61   | 2.168091168 | 0        |
| ATP5B    | 2,509  | 122.64 | 315.05 | 2.568900848 | 0        |
| ATP5D    | 1,088  | 39.56  | 90.74  | 2.293731041 | 0        |
| ATP5G1   | 0.702  | 7.61   | 50.40  | 6.622864652 | 0        |
| ATP5GP1  | 0.628  | 8.04   | 28.44  | 3.537313433 | 0        |
| ATP5GP4  | 0.525  | 1.32   | 11.23  | 8.507575758 | 2.70E-12 |
| ATP5H    | 0.622  | 22.11  | 89.65  | 4.054726368 | 0        |
| ATP5J    | 3,357  | 7.11   | 19.20  | 2.700421941 | 0        |
| ATP5J2   | 1,557  | 16.96  | 89.54  | 5.279481132 | 0        |
| ATP5J2P2 | 0.428  | 38.14  | 100.77 | 2.642108023 | 0        |
| ATP6AP1  | 2,099  | 21.26  | 57.47  | 2.703198495 | 0        |
| ATP6AP2  | 2,037  | 9.42   | 21.17  | 2.247346072 | 0        |
| ATP6V0E1 | 0.882  | 19.63  | 101.05 | 5.147733062 | 0        |
| ATP6V1C1 | 5,761  | 1.01   | 2.86   | 2.831683168 | 3.50E-14 |
| ATP6V1D  | 1,669  | 3.73   | 13.68  | 3.667560322 | 0        |
| ATP6V1F  | 1,382  | 23.34  | 60.34  | 2.585261354 | 0        |
| ATP8B2   | 6,568  | 6.67   | 19.11  | 2.865067466 | 0        |
| ATP8B4   | 5,677  | 0.16   | 4.41   | 27.5625     | 0        |
| ATP9A    | 7.58   | 0.81   | 2.54   | 3.135802469 | 0        |
| ATPAF1   | 1,758  | 2.76   | 16.67  | 6.039855072 | 0        |
| ATPBD1C  | 1,459  | 1.63   | 6.30   | 3.865030675 | 1.93E-11 |
| ATPBD3   | 1,151  | 0.86   | 6.51   | 7.569767442 | 1.90E-14 |
| ATRN     | 8.87   | 1.11   | 3.10   | 2.792792793 | 0        |
| ATXN10   | 2,963  | 9.31   | 24.47  | 2.628356606 | 0        |
| ATXN2    | 4,702  | 2.38   | 6.65   | 2.794117647 | 0        |
| AURKA    | 2,817  | 0.18   | 4.09   | 22.72222222 | 0        |
| AURKAIP1 | 0.752  | 25.78  | 93.87  | 3.641194725 | 0        |
| AURKB    | 1,236  | 4.40   | 26.45  | 6.011363636 | 0        |
| AVEN     | 1,531  | 1.29   | 6.27   | 4.860465116 | 4.10E-14 |
| AXIN1    | 3,448  | 6.05   | 13.93  | 2.302479339 | 0        |
| AYTL2    | 3,946  | 3.36   | 10.91  | 3.24702381  | 0        |

|          |        |       |        |             |          |
|----------|--------|-------|--------|-------------|----------|
| B3GALT6  | 2,774  | 1.64  | 15.64  | 9.536585366 | 0        |
| B3GNT1   | 2.07   | 0.48  | 8.51   | 17.72916667 | 0        |
| B4GALNT3 | 3,438  | 0.09  | 1.79   | 19.88888889 | 0        |
| B4GALT2  | 2,313  | 2.69  | 13.66  | 5.078066914 | 0        |
| B4GALT5  | 4,645  | 3.48  | 8.78   | 2.522988506 | 0        |
| BACE1    | 5,983  | 0.96  | 7.33   | 7.635416667 | 0        |
| BAD      | 1,197  | 8.27  | 20.90  | 2.527206771 | 0        |
| BAHD1    | 4,517  | 3.41  | 12.59  | 3.692082111 | 0        |
| BAIAP2   | 4,925  | 0.22  | 2.57   | 11.68181818 | 0        |
| BANF1    | 1,152  | 6.53  | 72.83  | 11.15313936 | 0        |
| BANK1    | 3,239  | 13.90 | 51.39  | 3.697122302 | 0        |
| BAT2     | 20,793 | 0.20  | 0.84   | 4.2         | 0        |
| BATF     | 0.939  | 1.48  | 7.44   | 5.027027027 | 9.35E-11 |
| BAX      | 1,799  | 15.79 | 50.54  | 3.200759975 | 0        |
| BAZ1A    | 6,016  | 3.56  | 12.22  | 3.43258427  | 0        |
| BAZ1B    | 15.31  | 1.92  | 5.35   | 2.786458333 | 0        |
| BCAM     | 3,203  | 1.82  | 4.37   | 2.401098901 | 9.48E-10 |
| BCAP31   | 1,324  | 21.60 | 105.17 | 4.868981481 | 0        |
| BCAR3    | 3,171  | 1.12  | 4.91   | 4.383928571 | 0        |
| BCAS3    | 3,496  | 1.56  | 6.75   | 4.326923077 | 0        |
| BCAS4    | 2,034  | 0.83  | 4.84   | 5.831325301 | 0        |
| BCAT1    | 8,191  | 1.11  | 7.55   | 6.801801802 | 0        |
| BCAT2    | 1.58   | 2.13  | 17.59  | 8.258215962 | 0        |
| BCCIP    | 3,261  | 7.07  | 20.82  | 2.944837341 | 0        |
| BCKDHA   | 1,764  | 10.66 | 28.13  | 2.638836773 | 0        |
| BCKDHB   | 3,996  | 0.25  | 2.15   | 8.6         | 0        |
| BCKDK    | 1.83   | 5.68  | 31.07  | 5.470070423 | 0        |
| BCL2     | 7,205  | 0.84  | 9.15   | 10.89285714 | 0        |
| BCL2L1   | 2,934  | 26.67 | 76.83  | 2.880764904 | 0        |
| BCL2L13  | 3,367  | 2.03  | 13.86  | 6.827586207 | 0        |
| BCL7C    | 1,136  | 15.50 | 37.90  | 2.44516129  | 0        |
| BCL9     | 6,278  | 0.28  | 1.42   | 5.071428571 | 8.00E-14 |
| BCL9L    | 7,536  | 3.40  | 14.07  | 4.138235294 | 0        |
| BCOR     | 9,421  | 3.25  | 6.76   | 2.08        | 0        |
| BCORL1   | 6.74   | 0.49  | 3.01   | 6.142857143 | 0        |
| BCS1L    | 1,584  | 4.37  | 16.70  | 3.821510297 | 0        |
| BDH1     | 3,689  | 0.72  | 3.95   | 5.486111111 | 0        |



|         |        |        |        |             |          |
|---------|--------|--------|--------|-------------|----------|
| BGN     | 2.38   | 0.37   | 3.93   | 10.62162162 | 0        |
| BID     | 2,812  | 2.57   | 14.47  | 5.630350195 | 0        |
| BIN1    | 3,161  | 10.30  | 21.58  | 2.095145631 | 0        |
| BIRC5   | 4,871  | 0.84   | 5.38   | 6.404761905 | 0        |
| BIVM    | 3,857  | 0.87   | 3.03   | 3.482758621 | 4.32E-13 |
| BLK     | 2.59   | 4.44   | 26.83  | 6.042792793 | 0        |
| BLM     | 4,417  | 0.60   | 2.16   | 3.6         | 1.90E-11 |
| BLNK    | 1,816  | 9.42   | 68.79  | 7.302547771 | 0        |
| BLOC1S1 | 0.1    | 159.29 | 422.86 | 2.654655032 | 0        |
| BLVRB   | 0.797  | 5.71   | 29.39  | 5.147110333 | 0        |
| BMI1    | 3,203  | 3.21   | 10.81  | 3.367601246 | 0        |
| BMP4    | 2,383  | 0.00   | 12.34  | 12.34       | 0        |
| BOLA1   | 0.808  | 2.57   | 10.11  | 3.93385214  | 1.90E-10 |
| BOLA2   | 1,778  | 5.01   | 10.85  | 2.165668663 | 9.74E-11 |
| BOLA2B  | 1,012  | 8.80   | 19.06  | 2.165909091 | 9.74E-11 |
| BOLA3   | 0.812  | 2.92   | 16.39  | 5.613013699 | 0        |
| BOP1    | 2,373  | 6.33   | 33.30  | 5.260663507 | 0        |
| BPGM    | 5,956  | 0.52   | 1.54   | 2.961538462 | 1.02E-08 |
| BPNT1   | 2,452  | 0.68   | 9.27   | 13.63235294 | 0        |
| BRCA1   | 11,393 | 0.16   | 2.19   | 13.6875     | 0        |
| BRCC3   | 2,914  | 1.15   | 3.21   | 2.791304348 | 1.22E-08 |
| BRD3    | 3,069  | 4.38   | 11.19  | 2.554794521 | 0        |
| BRD7    | 2,204  | 6.19   | 19.61  | 3.168012924 | 0        |
| BRD8    | 4,913  | 5.08   | 12.81  | 2.521653543 | 0        |
| BRDG1   | 1,506  | 10.51  | 22.94  | 2.182683159 | 0        |
| BRE     | 2,709  | 2.81   | 10.63  | 3.782918149 | 0        |
| BRI3BP  | 1,272  | 1.87   | 12.56  | 6.71657754  | 0        |
| BRMS1   | 2,147  | 10.00  | 20.95  | 2.095       | 0        |
| BRPF3   | 6,019  | 3.21   | 8.05   | 2.507788162 | 0        |
| BSCL2   | 1,633  | 5.70   | 28.21  | 4.949122807 | 0        |
| BSG     | 2,598  | 26.35  | 101.12 | 3.837571157 | 0        |
| BST2    | 0.939  | 41.83  | 143.35 | 3.426966292 | 0        |
| BTBD14B | 4,491  | 7.87   | 21.83  | 2.773824651 | 0        |
| BTBD2   | 2,618  | 22.82  | 56.18  | 2.461875548 | 0        |
| BTK     | 3,014  | 15.20  | 43.19  | 2.841447368 | 0        |
| BTN2A2  | 3,565  | 7.08   | 16.26  | 2.296610169 | 0        |
| BTN3A2  | 3,812  | 5.58   | 34.09  | 6.109318996 | 0        |

|           |       |        |        |             |          |
|-----------|-------|--------|--------|-------------|----------|
| BTN3A3    | 3,287 | 3.46   | 16.76  | 4.843930636 | 0        |
| BTRC      | 6,121 | 2.33   | 5.01   | 2.150214592 | 1.00E-15 |
| BUB1      | 3,482 | 0.85   | 7.69   | 9.047058824 | 0        |
| BUB3      | 2,968 | 14.13  | 31.70  | 2.243453645 | 0        |
| BUD13     | 2,193 | 4.11   | 11.64  | 2.832116788 | 0        |
| BVES      | 5,583 | 0.11   | 1.44   | 13.09090909 | 0        |
| BYSL      | 1.99  | 2.34   | 17.82  | 7.615384615 | 0        |
| C10orf104 | 3,195 | 9.23   | 25.79  | 2.794149512 | 0        |
| C10orf119 | 4,113 | 5.15   | 11.16  | 2.166990291 | 0        |
| C10orf128 | 4,316 | 0.39   | 7.84   | 20.1025641  | 0        |
| C10orf25  | 3,078 | 0.77   | 8.57   | 11.12987013 | 0        |
| C10orf26  | 3,403 | 1.02   | 15.39  | 15.08823529 | 0        |
| C10orf47  | 3,333 | 0.29   | 2.00   | 6.896551724 | 5.94E-13 |
| C10orf54  | 4,981 | 27.89  | 56.48  | 2.025098602 | 0        |
| C10orf56  | 4,933 | 0.16   | 2.30   | 14.375      | 0        |
| C10orf57  | 2,036 | 0.59   | 9.02   | 15.28813559 | 0        |
| C10orf61  | 3,629 | 1.53   | 9.36   | 6.117647059 | 0        |
| C10orf72  | 4,606 | 1.68   | 9.59   | 5.708333333 | 0        |
| C11orf10  | 0.408 | 63.05  | 149.48 | 2.370816812 | 0        |
| C11orf17  | 1,962 | 2.87   | 12.71  | 4.428571429 | 0        |
| C11orf24  | 2.05  | 1.69   | 8.83   | 5.224852071 | 0        |
| C11orf48  | 1.32  | 4.95   | 25.45  | 5.141414141 | 0        |
| C11orf49  | 3,314 | 1.19   | 4.20   | 3.529411765 | 1.00E-15 |
| C11orf56  | 3,413 | 4.29   | 8.86   | 2.065268065 | 1.40E-14 |
| C11orf60  | 1,819 | 2.34   | 7.36   | 3.145299145 | 5.05E-13 |
| C11orf67  | 0.504 | 3.54   | 16.88  | 4.768361582 | 1.67E-12 |
| C11orf68  | 1,557 | 8.39   | 29.11  | 3.469606675 | 0        |
| C11orf73  | 1,102 | 1.70   | 12.99  | 7.641176471 | 0        |
| C11orf79  | 1,209 | 14.81  | 32.67  | 2.205941931 | 0        |
| C12orf10  | 1.2   | 18.14  | 41.63  | 2.294928335 | 0        |
| C12orf24  | 1,486 | 0.93   | 6.24   | 6.709677419 | 0        |
| C12orf32  | 1,862 | 2.92   | 13.21  | 4.523972603 | 0        |
| C12orf52  | 1,775 | 1.89   | 17.23  | 9.116402116 | 0        |
| C12orf57  | 0.829 | 104.67 | 394.65 | 3.770421324 | 0        |
| C13orf1   | 3,053 | 0.26   | 3.26   | 12.53846154 | 0        |
| C13orf3   | 2,888 | 0.20   | 3.38   | 16.9        | 0        |
| C13orf34  | 2,773 | 1.07   | 3.13   | 2.925233645 | 2.53E-08 |

|           |       |       |       |             |          |
|-----------|-------|-------|-------|-------------|----------|
| C14orf1   | 2,263 | 3.72  | 12.17 | 3.271505376 | 0        |
| C14orf100 | 1,665 | 3.56  | 9.06  | 2.54494382  | 1.73E-11 |
| C14orf101 | 4,264 | 0.65  | 2.85  | 4.384615385 | 0        |
| C14orf104 | 1,748 | 0.96  | 4.38  | 4.5625      | 7.07E-11 |
| C14orf112 | 0.68  | 11.93 | 24.65 | 2.066219614 | 9.74E-09 |
| C14orf119 | 2.84  | 3.45  | 13.43 | 3.892753623 | 0        |
| C14orf126 | 2,681 | 0.33  | 2.23  | 6.757575758 | 1.18E-11 |
| C14orf130 | 3,994 | 3.37  | 10.38 | 3.080118694 | 0        |
| C14orf135 | 2,653 | 0.60  | 5.69  | 9.483333333 | 0        |
| C14orf142 | 1,156 | 0.43  | 6.34  | 14.74418605 | 0        |
| C14orf147 | 2.62  | 1.82  | 5.11  | 2.807692308 | 2.23E-11 |
| C14orf151 | 1,689 | 3.51  | 8.03  | 2.287749288 | 6.09E-09 |
| C14orf153 | 2,491 | 1.43  | 4.53  | 3.167832168 | 2.33E-11 |
| C14orf159 | 2,973 | 4.29  | 18.53 | 4.319347319 | 0        |
| C14orf169 | 2,428 | 2.44  | 8.36  | 3.426229508 | 0        |
| C14orf172 | 1,714 | 3.75  | 10.89 | 2.904       | 1.00E-15 |
| C14orf173 | 3.82  | 10.83 | 23.06 | 2.129270545 | 0        |
| C14orf94  | 1,599 | 14.23 | 31.61 | 2.221363317 | 0        |
| C15orf17  | 2,288 | 3.29  | 15.65 | 4.756838906 | 0        |
| C15orf23  | 1,054 | 1.13  | 8.15  | 7.212389381 | 0        |
| C15orf29  | 2,666 | 0.60  | 2.81  | 4.683333333 | 6.84E-11 |
| C15orf39  | 3,751 | 10.28 | 27.22 | 2.647859922 | 0        |
| C15orf42  | 3,158 | 0.69  | 3.52  | 5.101449275 | 0        |
| C16orf14  | 0.91  | 0.87  | 7.59  | 8.724137931 | 2.70E-14 |
| C16orf24  | 0.858 | 2.20  | 9.42  | 4.281818182 | 7.93E-11 |
| C16orf33  | 1,673 | 1.60  | 14.96 | 9.35        | 0        |
| C16orf35  | 2,752 | 6.54  | 15.73 | 2.405198777 | 0        |
| C16orf42  | 1,204 | 10.11 | 38.76 | 3.833827893 | 0        |
| C16orf45  | 2,032 | 5.31  | 16.58 | 3.122410546 | 0        |
| C16orf48  | 1,538 | 3.80  | 8.82  | 2.321052632 | 6.09E-09 |
| C16orf5   | 2,755 | 1.48  | 26.21 | 17.70945946 | 0        |
| C16orf53  | 1,143 | 3.03  | 14.15 | 4.669966997 | 0        |
| C16orf57  | 2,254 | 1.76  | 25.19 | 14.3125     | 0        |
| C16orf58  | 2.76  | 19.64 | 48.77 | 2.483197556 | 0        |
| C16orf75  | 1,432 | 0.69  | 4.12  | 5.971014493 | 2.50E-10 |
| C16orf80  | 1,292 | 14.63 | 35.53 | 2.428571429 | 0        |
| C17orf25  | 1,792 | 5.14  | 16.21 | 3.153696498 | 0        |

|           |       |       |        |             |          |
|-----------|-------|-------|--------|-------------|----------|
| C17orf37  | 0.754 | 20.86 | 69.60  | 3.336529243 | 0        |
| C17orf38  | 2,264 | 1.62  | 6.46   | 3.987654321 | 0        |
| C17orf39  | 4,232 | 0.79  | 3.56   | 4.506329114 | 0        |
| C17orf60  | 1,331 | 6.17  | 31.68  | 5.13452188  | 0        |
| C17orf61  | 0.448 | 32.68 | 72.01  | 2.203488372 | 0        |
| C17orf62  | 4,395 | 13.96 | 53.58  | 3.838108883 | 0        |
| C17orf70  | 3,821 | 4.35  | 9.98   | 2.294252874 | 0        |
| C17orf80  | 2,127 | 1.48  | 5.82   | 3.932432432 | 1.00E-15 |
| C17orf81  | 3,302 | 5.46  | 17.55  | 3.214285714 | 0        |
| C18orf37  | 0.974 | 5.89  | 21.52  | 3.653650255 | 0        |
| C18orf45  | 2,941 | 0.70  | 3.29   | 4.7         | 4.10E-14 |
| C18orf51  | 2,053 | 0.00  | 15.67  | 15.67       | 0        |
| C18orf55  | 1,319 | 2.33  | 7.03   | 3.017167382 | 4.62E-09 |
| C19orf10  | 1,051 | 17.61 | 64.36  | 3.654741624 | 0        |
| C19orf12  | 3,396 | 2.24  | 6.55   | 2.924107143 | 0        |
| C19orf2   | 2,425 | 3.75  | 13.72  | 3.658666667 | 0        |
| C19orf24  | 1,041 | 7.51  | 25.87  | 3.444740346 | 0        |
| C19orf25  | 2,131 | 2.28  | 8.06   | 3.535087719 | 0        |
| C19orf28  | 3,043 | 15.71 | 45.71  | 2.909611712 | 0        |
| C19orf42  | 1,145 | 2.76  | 12.73  | 4.612318841 | 0        |
| C19orf47  | 2,126 | 2.14  | 7.05   | 3.294392523 | 4.00E-15 |
| C19orf48  | 1,811 | 17.04 | 45.17  | 2.650821596 | 0        |
| C19orf49  | 0.804 | 4.80  | 13.62  | 2.8375      | 9.00E-10 |
| C19orf53  | 0.568 | 52.96 | 160.91 | 3.038330816 | 0        |
| C19orf54  | 1,736 | 3.08  | 8.57   | 2.782467532 | 2.47E-12 |
| C19orf56  | 0.839 | 29.60 | 75.70  | 2.557432432 | 0        |
| C19orf59  | 2,373 | 7.88  | 24.60  | 3.121827411 | 0        |
| C1GALT1C1 | 1,838 | 0.92  | 4.21   | 4.576086957 | 4.40E-11 |
| C1orf107  | 8,463 | 0.37  | 1.12   | 3.027027027 | 2.08E-09 |
| C1orf109  | 2,355 | 0.54  | 3.76   | 6.962962963 | 0        |
| C1orf123  | 1,085 | 6.83  | 29.66  | 4.342606149 | 0        |
| C1orf131  | 1,435 | 1.45  | 6.16   | 4.248275862 | 7.85E-12 |
| C1orf149  | 2,147 | 4.28  | 19.07  | 4.455607477 | 0        |
| C1orf163  | 1,614 | 2.14  | 6.68   | 3.121495327 | 4.20E-11 |
| C1orf164  | 3,439 | 13.84 | 29.16  | 2.106936416 | 0        |
| C1orf19   | 1,925 | 6.89  | 15.01  | 2.178519594 | 1.00E-15 |
| C1orf2    | 3.19  | 3.75  | 14.50  | 3.866666667 | 0        |

|           |       |       |        |             |          |
|-----------|-------|-------|--------|-------------|----------|
| C1orf25   | 4,359 | 0.61  | 2.09   | 3.426229508 | 1.63E-10 |
| C1orf57   | 0.902 | 6.80  | 29.68  | 4.364705882 | 0        |
| C1orf59   | 1,867 | 1.54  | 8.57   | 5.564935065 | 0        |
| C1orf66   | 2,243 | 1.24  | 6.46   | 5.209677419 | 0        |
| C1orf75   | 2,475 | 0.32  | 4.50   | 14.0625     | 0        |
| C1orf83   | 4,097 | 0.27  | 2.36   | 8.740740741 | 0        |
| C1orf85   | 1,585 | 4.68  | 16.58  | 3.542735043 | 0        |
| C1orf86   | 2,216 | 5.27  | 15.13  | 2.870967742 | 0        |
| C1orf93   | 2,709 | 3.32  | 7.12   | 2.144578313 | 9.74E-11 |
| C1QA      | 1,098 | 0.54  | 5.75   | 10.64814815 | 6.00E-14 |
| C1QB      | 1,044 | 1.04  | 11.22  | 10.78846154 | 0        |
| C1QBP     | 1,163 | 38.45 | 131.67 | 3.424447334 | 0        |
| C1QC      | 1,139 | 0.26  | 6.59   | 25.34615385 | 0        |
| C1R       | 1,096 | 3.80  | 16.29  | 4.286842105 | 0        |
| C1RL      | 3,319 | 2.84  | 9.72   | 3.422535211 | 0        |
| C1S       | 3,009 | 2.46  | 6.81   | 2.768292683 | 0        |
| C20orf108 | 3,034 | 4.66  | 12.60  | 2.703862661 | 0        |
| C20orf117 | 3.71  | 1.01  | 5.53   | 5.475247525 | 0        |
| C20orf118 | 2,041 | 0.53  | 6.52   | 12.30188679 | 0        |
| C20orf135 | 1,776 | 0.84  | 3.89   | 4.630952381 | 2.69E-10 |
| C20orf20  | 1,603 | 2.90  | 15.92  | 5.489655172 | 0        |
| C20orf27  | 1,376 | 45.37 | 322.99 | 7.11902138  | 0        |
| C20orf29  | 1,832 | 1.89  | 9.52   | 5.037037037 | 0        |
| C20orf3   | 2,221 | 10.51 | 37.54  | 3.571836346 | 0        |
| C20orf30  | 2,508 | 4.58  | 31.20  | 6.812227074 | 0        |
| C20orf39  | 2,437 | 0.52  | 8.43   | 16.21153846 | 0        |
| C20orf44  | 3,974 | 1.67  | 5.40   | 3.233532934 | 0        |
| C20orf52  | 0.477 | 32.15 | 79.46  | 2.471539658 | 0        |
| C20orf55  | 1,748 | 4.70  | 59.03  | 12.55957447 | 0        |
| C21orf33  | 2,201 | 16.10 | 50.25  | 3.121118012 | 0        |
| C21orf51  | 1,193 | 1.24  | 5.65   | 4.556451613 | 6.94E-10 |
| C21orf59  | 1,064 | 2.33  | 27.02  | 11.59656652 | 0        |
| C21orf6   | 1,712 | 1.50  | 7.87   | 5.246666667 | 0        |
| C21orf70  | 0.881 | 1.12  | 6.98   | 6.232142857 | 5.27E-11 |
| C22orf15  | 2.02  | 0.98  | 4.59   | 4.683673469 | 1.78E-13 |
| C22orf16  | 0.682 | 7.40  | 101.41 | 13.70405405 | 0        |
| C22orf23  | 1,562 | 1.84  | 9.25   | 5.027173913 | 0        |

|          |       |       |       |             |          |
|----------|-------|-------|-------|-------------|----------|
| C22orf25 | 2,271 | 5.18  | 13.95 | 2.693050193 | 0        |
| C22orf28 | 2,02  | 16.95 | 41.41 | 2.443067847 | 0        |
| C22orf34 | 1,465 | 0.81  | 5.37  | 6.62962963  | 3.40E-14 |
| C22orf9  | 6,417 | 1.36  | 17.86 | 13.13235294 | 0        |
| C2orf17  | 2,614 | 18.25 | 38.64 | 2.117260274 | 0        |
| C2orf28  | 1,964 | 9.47  | 30.11 | 3.179514256 | 0        |
| C2orf42  | 2,524 | 0.98  | 3.81  | 3.887755102 | 5.08E-12 |
| C2orf43  | 2,856 | 0.38  | 4.24  | 11.15789474 | 0        |
| C2orf44  | 3,784 | 0.63  | 3.63  | 5.761904762 | 0        |
| C2orf7   | 1,083 | 1.37  | 11.90 | 8.686131387 | 0        |
| C3orf1   | 1,596 | 1.30  | 17.05 | 13.11538462 | 0        |
| C3orf18  | 2,655 | 0.34  | 3.62  | 10.64705882 | 0        |
| C3orf21  | 2,703 | 0.84  | 10.88 | 12.95238095 | 0        |
| C3orf23  | 6,964 | 0.33  | 1.42  | 4.303030303 | 2.00E-13 |
| C3orf26  | 1,198 | 3.72  | 14.49 | 3.89516129  | 0        |
| C3orf54  | 1.04  | 12.27 | 41.06 | 3.346373268 | 0        |
| C3orf60  | 2,829 | 4.72  | 27.30 | 5.783898305 | 0        |
| C3orf63  | 7,125 | 2.11  | 5.78  | 2.739336493 | 0        |
| C4orf16  | 2,817 | 0.95  | 2.96  | 3.115789474 | 1.52E-08 |
| C4orf27  | 1,171 | 0.84  | 6.62  | 7.880952381 | 1.00E-15 |
| C4orf34  | 1,669 | 1.00  | 4.39  | 4.39        | 1.11E-10 |
| C5orf13  | 2,019 | 6.66  | 22.57 | 3.388888889 | 0        |
| C5orf14  | 3,689 | 2.68  | 5.75  | 2.145522388 | 1.30E-11 |
| C5orf21  | 4,178 | 1.28  | 3.22  | 2.515625    | 8.29E-10 |
| C5orf3   | 2,886 | 1.20  | 4.38  | 3.65        | 1.90E-14 |
| C5orf37  | 1,698 | 1.40  | 5.21  | 3.721428571 | 1.15E-10 |
| C6orf108 | 1,161 | 2.56  | 12.26 | 4.7890625   | 0        |
| C6orf115 | 1,213 | 7.01  | 24.58 | 3.506419401 | 0        |
| C6orf125 | 0.506 | 2.93  | 43.78 | 14.94197952 | 0        |
| C6orf129 | 0.607 | 1.96  | 10.83 | 5.525510204 | 7.80E-11 |
| C6orf173 | 0.527 | 3.00  | 16.94 | 5.646666667 | 1.60E-14 |
| C6orf185 | 1,183 | 0.00  | 17.09 | 17.09       | 0        |
| C6orf203 | 0.899 | 1.98  | 10.78 | 5.444444444 | 2.00E-15 |
| C6orf49  | 2,897 | 21.34 | 54.64 | 2.560449859 | 0        |
| C6orf51  | 0.941 | 7.04  | 24.62 | 3.497159091 | 0        |
| C6orf55  | 3,244 | 2.38  | 8.26  | 3.470588235 | 0        |
| C7orf11  | 1,812 | 2.62  | 10.74 | 4.099236641 | 0        |

|          |        |        |        |             |          |
|----------|--------|--------|--------|-------------|----------|
| C7orf24  | 2.33   | 3.10   | 8.17   | 2.635483871 | 1.80E-14 |
| C7orf26  | 3,819  | 4.12   | 14.36  | 3.485436893 | 0        |
| C7orf28A | 3,652  | 3.44   | 8.10   | 2.354651163 | 0        |
| C7orf31  | 7,218  | 0.28   | 1.22   | 4.357142857 | 2.96E-12 |
| C7orf48  | 2,778  | 2.42   | 8.09   | 3.342975207 | 0        |
| C8orf13  | 4,071  | 0.04   | 2.54   | 63.5        | 0        |
| C8orf30A | 2,404  | 0.45   | 6.97   | 15.48888889 | 0        |
| C8orf55  | 2,264  | 0.83   | 8.11   | 9.771084337 | 0        |
| C8orf58  | 2,054  | 1.83   | 5.95   | 3.25136612  | 1.71E-12 |
| C9orf105 | 1,448  | 4.65   | 16.17  | 3.477419355 | 0        |
| C9orf114 | 1,856  | 2.72   | 18.52  | 6.808823529 | 0        |
| C9orf119 | 0.981  | 1.21   | 13.39  | 11.0661157  | 0        |
| C9orf123 | 2,487  | 3.14   | 14.90  | 4.74522293  | 0        |
| C9orf127 | 2,109  | 0.99   | 4.23   | 4.272727273 | 4.97E-12 |
| C9orf139 | 3,815  | 0.52   | 2.08   | 4           | 3.10E-10 |
| C9orf140 | 3,648  | 0.19   | 2.12   | 11.15789474 | 0        |
| C9orf142 | 0.812  | 10.72  | 27.80  | 2.593283582 | 0        |
| C9orf167 | 4,071  | 1.53   | 3.87   | 2.529411765 | 1.44E-11 |
| C9orf23  | 1,124  | 2.73   | 9.74   | 3.567765568 | 1.72E-12 |
| C9orf25  | 3,594  | 2.12   | 11.95  | 5.636792453 | 0        |
| C9orf37  | 1,388  | 4.28   | 10.10  | 2.359813084 | 2.70E-09 |
| C9orf58  | 3.65   | 5.09   | 19.13  | 3.758349705 | 0        |
| C9orf6   | 2,124  | 1.63   | 4.91   | 3.012269939 | 6.37E-10 |
| C9orf75  | 2,109  | 1.59   | 6.07   | 3.817610063 | 1.00E-15 |
| C9orf9   | 0.719  | 1.65   | 8.32   | 5.042424242 | 1.49E-09 |
| CA1      | 1,264  | 3.68   | 48.45  | 13.16576087 | 0        |
| CABLES2  | 3,777  | 0.39   | 6.71   | 17.20512821 | 0        |
| CACYBP   | 3,535  | 3.13   | 10.41  | 3.325878594 | 0        |
| CAD      | 7,108  | 1.85   | 13.30  | 7.189189189 | 0        |
| CALD1    | 11,776 | 0.66   | 3.37   | 5.106060606 | 0        |
| CALM1    | 10,777 | 55.45  | 125.16 | 2.25716862  | 0        |
| CALM2    | 1,128  | 66.66  | 180.57 | 2.708820882 | 0        |
| CALM3    | 2,259  | 43.71  | 210.24 | 4.809883322 | 0        |
| CALR     | 2,253  | 117.42 | 724.09 | 6.166666667 | 0        |
| CALU     | 6,634  | 1.08   | 7.37   | 6.824074074 | 0        |
| CAMK1    | 1,483  | 1.80   | 29.88  | 16.6        | 0        |
| CAMP     | 0.714  | 0.69   | 10.97  | 15.89855072 | 0        |

|          |        |        |        |             |          |
|----------|--------|--------|--------|-------------|----------|
| CANX     | 5,074  | 23.98  | 88.60  | 3.694745621 | 0        |
| CAP1     | 2,923  | 42.14  | 92.56  | 2.196487897 | 0        |
| CAPG     | 1,442  | 7.75   | 22.84  | 2.947096774 | 0        |
| CAPN1    | 3,658  | 19.58  | 68.19  | 3.482635342 | 0        |
| CAPN5    | 4,393  | 0.60   | 3.19   | 5.316666667 | 0        |
| CAPNS1   | 1.49   | 108.30 | 324.79 | 2.998984303 | 0        |
| CAPZB    | 4,771  | 30.63  | 133.90 | 4.371531179 | 0        |
| CARD6    | 4,097  | 0.51   | 4.28   | 8.392156863 | 0        |
| CARD8    | 5,063  | 5.16   | 18.49  | 3.583333333 | 0        |
| CARM1    | 2,968  | 9.27   | 20.32  | 2.19201726  | 0        |
| CARS2    | 1,843  | 7.14   | 19.75  | 2.766106443 | 0        |
| CASC4    | 3,961  | 2.72   | 6.91   | 2.540441176 | 0        |
| CASC5    | 8,693  | 0.29   | 1.35   | 4.655172414 | 0        |
| CASKIN2  | 4,978  | 0.64   | 6.87   | 10.734375   | 0        |
| CASP1    | 1,408  | 17.29  | 50.51  | 2.921341816 | 0        |
| CASP8AP2 | 6,749  | 0.73   | 2.08   | 2.849315068 | 2.06E-12 |
| CAT      | 2.56   | 21.49  | 99.51  | 4.630525826 | 0        |
| CBARA1   | 2,363  | 7.87   | 17.29  | 2.196950445 | 0        |
| CBFA2T2  | 8,061  | 1.41   | 2.94   | 2.085106383 | 4.11E-12 |
| CBFA2T3  | 4,599  | 7.08   | 17.62  | 2.488700565 | 0        |
| CBFB     | 5,581  | 4.01   | 10.94  | 2.728179551 | 0        |
| CBL      | 11,227 | 2.36   | 5.99   | 2.538135593 | 0        |
| CBR1     | 1,245  | 1.19   | 14.14  | 11.88235294 | 0        |
| CBX2     | 5,016  | 0.79   | 5.56   | 7.037974684 | 0        |
| CBX5     | 1,545  | 12.43  | 25.89  | 2.082864039 | 0        |
| CBX6     | 5,164  | 10.38  | 25.84  | 2.489402697 | 0        |
| CBX8     | 1,521  | 0.59   | 3.76   | 6.372881356 | 3.69E-10 |
| CBY1     | 1,271  | 1.16   | 6.03   | 5.198275862 | 1.85E-12 |
| CC2D1A   | 3,686  | 4.24   | 8.55   | 2.016509434 | 2.20E-14 |
| CCDC101  | 1,141  | 5.29   | 14.76  | 2.790170132 | 7.70E-14 |
| CCDC102A | 2,429  | 0.90   | 4.27   | 4.744444444 | 4.00E-15 |
| CCDC106  | 1,993  | 2.48   | 8.71   | 3.512096774 | 0        |
| CCDC115  | 1,644  | 8.79   | 20.60  | 2.343572241 | 0        |
| CCDC123  | 2,605  | 0.68   | 3.55   | 5.220588235 | 1.10E-14 |
| CCDC124  | 1,038  | 20.40  | 50.32  | 2.466666667 | 0        |
| CCDC125  | 7,233  | 0.38   | 1.29   | 3.394736842 | 1.58E-10 |
| CCDC128  | 3,137  | 2.05   | 5.21   | 2.541463415 | 5.33E-12 |



|         |       |        |        |             |          |
|---------|-------|--------|--------|-------------|----------|
| CCDC21  | 3,935 | 1.48   | 5.01   | 3.385135135 | 0        |
| CCDC25  | 3,586 | 2.21   | 6.70   | 3.031674208 | 0        |
| CCDC26  | 1,721 | 0.75   | 6.60   | 8.8         | 0        |
| CCDC28B | 1,415 | 2.73   | 7.98   | 2.923076923 | 1.94E-10 |
| CCDC32  | 1,705 | 6.38   | 16.60  | 2.601880878 | 0        |
| CCDC34  | 3,051 | 1.07   | 5.41   | 5.056074766 | 0        |
| CCDC51  | 1,506 | 0.39   | 5.26   | 13.48717949 | 0        |
| CCDC53  | 0.857 | 3.81   | 11.01  | 2.88976378  | 8.30E-09 |
| CCDC56  | 0.753 | 3.02   | 46.98  | 15.55629139 | 0        |
| CCDC71  | 1,781 | 5.39   | 18.21  | 3.378478664 | 0        |
| CCDC76  | 3,129 | 0.85   | 2.93   | 3.447058824 | 1.63E-10 |
| CCDC85B | 1,232 | 10.84  | 58.94  | 5.437269373 | 0        |
| CCDC86  | 1,893 | 1.78   | 22.03  | 12.37640449 | 0        |
| CCDC90A | 1,229 | 2.33   | 8.09   | 3.472103004 | 1.70E-11 |
| CCDC90B | 1,578 | 2.13   | 13.82  | 6.488262911 | 0        |
| CCDC91  | 2,335 | 1.06   | 4.11   | 3.877358491 | 7.89E-12 |
| CCDC92  | 1,793 | 2.04   | 9.96   | 4.882352941 | 0        |
| CCDC95  | 1,185 | 7.68   | 34.76  | 4.526041667 | 0        |
| CCDC97  | 3,322 | 6.64   | 28.96  | 4.361445783 | 0        |
| CCDC99  | 2,529 | 0.70   | 4.33   | 6.185714286 | 0        |
| CCL17   | 0.615 | 360.36 | 961.66 | 2.668609169 | 0        |
| CCL2    | 0.749 | 0.40   | 25.53  | 63.825      | 0        |
| CCM2    | 4,612 | 3.56   | 10.23  | 2.873595506 | 0        |
| CCNA2   | 1,676 | 1.07   | 10.55  | 9.859813084 | 0        |
| CCNB1   | 2,093 | 1.65   | 19.40  | 11.75757576 | 0        |
| CCNB2   | 1,513 | 3.14   | 18.21  | 5.799363057 | 0        |
| CCND1   | 4,289 | 0.14   | 2.97   | 21.21428571 | 0        |
| CCND2   | 6.48  | 29.26  | 91.18  | 3.11619959  | 0        |
| CCND3   | 2,427 | 68.69  | 350.91 | 5.108603872 | 0        |
| CCNF    | 4,238 | 0.33   | 8.17   | 24.75757576 | 0        |
| CCT2    | 1,954 | 26.08  | 59.19  | 2.269555215 | 0        |
| CCT3    | 2,211 | 34.68  | 146.49 | 4.224048443 | 0        |
| CCT5    | 3,403 | 4.04   | 41.93  | 10.37871287 | 0        |
| CCT7    | 1,892 | 30.54  | 135.66 | 4.442043222 | 0        |
| CD164   | 2,993 | 13.85  | 77.46  | 5.592779783 | 0        |
| CD19    | 1.95  | 134.40 | 272.83 | 2.029985119 | 0        |
| CD209   | 4,267 | 0.16   | 3.35   | 20.9375     | 0        |

|         |       |         |         |             |          |
|---------|-------|---------|---------|-------------|----------|
| CD248   | 2,558 | 21.12   | 139.82  | 6.620265152 | 0        |
| CD300A  | 1,889 | 3.56    | 8.29    | 2.328651685 | 5.84E-10 |
| CD320   | 1.25  | 6.34    | 21.97   | 3.465299685 | 0        |
| CD34    | 4,738 | 147.57  | 361.43  | 2.449210544 | 0        |
| CD36    | 5,562 | 0.05    | 1.47    | 29.4        | 0        |
| CD40    | 2,509 | 3.98    | 16.21   | 4.072864322 | 0        |
| CD52    | 0.505 | 400.65  | 973.79  | 2.430525396 | 0        |
| CD53    | 5,162 | 57.71   | 209.39  | 3.628313984 | 0        |
| CD63    | 1,095 | 45.99   | 109.40  | 2.378777995 | 0        |
| CD70    | 0.913 | 0.87    | 8.12    | 9.333333333 | 1.00E-15 |
| CD74    | 2.2   | 3923.44 | 8588.40 | 2.18899741  | 0        |
| CD79A   | 1,444 | 116.07  | 278.72  | 2.401309555 | 0        |
| CD81    | 1,497 | 108.06  | 267.33  | 2.473903387 | 0        |
| CD82    | 2,223 | 12.19   | 130.73  | 10.72436423 | 0        |
| CD9     | 2,181 | 166.57  | 508.70  | 3.053971303 | 0        |
| CD93    | 6,701 | 0.98    | 5.61    | 5.724489796 | 0        |
| CD99L2  | 3,605 | 2.77    | 6.40    | 2.310469314 | 3.60E-14 |
| CDC123  | 1,738 | 25.68   | 51.73   | 2.0144081   | 0        |
| CDC2    | 1,227 | 2.26    | 11.33   | 5.013274336 | 0        |
| CDC20   | 1,669 | 3.20    | 45.88   | 14.3375     | 0        |
| CDC20P  | 1,621 | 1.46    | 11.12   | 7.616438356 | 0        |
| CDC25A  | 3,706 | 0.64    | 2.23    | 3.484375    | 1.57E-09 |
| CDC26   | 0.872 | 4.88    | 23.96   | 4.909836066 | 0        |
| CDC45L  | 1.91  | 1.92    | 5.12    | 2.666666667 | 3.39E-08 |
| CDC6    | 3,053 | 0.39    | 3.97    | 10.17948718 | 0        |
| CDCA2   | 3,722 | 0.16    | 1.72    | 10.75       | 2.00E-14 |
| CDCA3   | 1,119 | 0.71    | 9.79    | 13.78873239 | 0        |
| CDCA4   | 2.9   | 2.15    | 9.09    | 4.227906977 | 0        |
| CDCA5   | 2,485 | 4.22    | 11.93   | 2.827014218 | 0        |
| CDCA7   | 2.81  | 1.58    | 10.76   | 6.810126582 | 0        |
| CDCA8   | 2,303 | 2.28    | 14.15   | 6.206140351 | 0        |
| CDGAP   | 6.32  | 0.16    | 1.16    | 7.25        | 5.60E-14 |
| CDH5    | 4.09  | 1.98    | 10.56   | 5.333333333 | 0        |
| CDIPT   | 2,079 | 16.99   | 42.46   | 2.499117128 | 0        |
| CDK2    | 2.29  | 4.84    | 14.68   | 3.033057851 | 0        |
| CDK2AP2 | 1,378 | 9.26    | 77.51   | 8.370410367 | 0        |
| CDK4    | 1,443 | 8.29    | 62.52   | 7.541616405 | 0        |

|         |        |        |        |             |          |
|---------|--------|--------|--------|-------------|----------|
| CDK5    | 2,274  | 1.00   | 4.85   | 4.85        | 1.00E-15 |
| CDKN2A  | 2,735  | 1.38   | 14.45  | 10.47101449 | 0        |
| CDKN2B  | 7,485  | 0.44   | 1.99   | 4.522727273 | 0        |
| CDKN3   | 0.836  | 0.71   | 10.98  | 15.46478873 | 0        |
| CDT1    | 2,675  | 6.44   | 17.76  | 2.757763975 | 0        |
| CEACAM1 | 5,452  | 0.33   | 1.66   | 5.03030303  | 8.80E-14 |
| CEACAM6 | 2,528  | 0.94   | 16.26  | 17.29787234 | 0        |
| CEBPA   | 2,385  | 1.99   | 14.06  | 7.065326633 | 0        |
| CECR5   | 1.88   | 6.52   | 18.19  | 2.789877301 | 0        |
| CEL     | 2.35   | 0.46   | 2.44   | 5.304347826 | 7.06E-10 |
| CELSR2  | 10,534 | 0.74   | 2.22   | 3           | 0        |
| CENPA   | 1,389  | 0.50   | 6.19   | 12.38       | 0        |
| CENPB   | 2.84   | 13.55  | 56.00  | 4.132841328 | 0        |
| CENPE   | 8,612  | 0.33   | 1.44   | 4.363636364 | 0        |
| CENPF   | 10,296 | 0.92   | 8.57   | 9.315217391 | 0        |
| CENPJ   | 4,345  | 0.41   | 2.60   | 6.341463415 | 0        |
| CENPM   | 1.39   | 1.42   | 9.76   | 6.873239437 | 0        |
| CENTA1  | 4,592  | 1.03   | 4.61   | 4.475728155 | 0        |
| CENTD2  | 6,216  | 7.16   | 18.79  | 2.624301676 | 0        |
| CENTG1  | 3,938  | 1.08   | 5.60   | 5.185185185 | 0        |
| CEP250  | 8,348  | 2.63   | 8.07   | 3.068441065 | 0        |
| CEP55   | 2,618  | 0.45   | 3.70   | 8.222222222 | 0        |
| CEP63   | 2.77   | 1.93   | 6.96   | 3.606217617 | 0        |
| CES2    | 4,033  | 3.49   | 11.34  | 3.249283668 | 0        |
| CETN2   | 1.08   | 2.84   | 11.46  | 4.035211268 | 2.00E-15 |
| CETN3   | 0.982  | 0.70   | 8.32   | 11.88571429 | 0        |
| CFDP1   | 1,279  | 10.36  | 44.92  | 4.335907336 | 0        |
| CFL1    | 1.26   | 178.40 | 604.96 | 3.39103139  | 0        |
| CGI-09  | 2,311  | 1.32   | 5.54   | 4.196969697 | 0        |
| CHAF1A  | 3,343  | 5.09   | 10.91  | 2.143418468 | 0        |
| CHCHD3  | 3.19   | 3.88   | 9.21   | 2.37371134  | 0        |
| CHCHD4  | 1,549  | 0.38   | 5.06   | 13.31578947 | 0        |
| CHCHD6  | 0.946  | 2.20   | 8.46   | 3.845454545 | 4.69E-10 |
| CHCHD7  | 3,318  | 2.75   | 16.38  | 5.956363636 | 0        |
| CHCHD8  | 0.817  | 6.66   | 44.85  | 6.734234234 | 0        |
| CHD1L   | 2,967  | 8.37   | 18.29  | 2.185185185 | 0        |
| CHD4    | 6,497  | 17.38  | 55.72  | 3.20598389  | 0        |

|         |        |        |        |             |          |
|---------|--------|--------|--------|-------------|----------|
| CHEK2   | 1,987  | 0.60   | 5.22   | 8.7         | 0        |
| CHERP   | 4,075  | 6.87   | 16.77  | 2.441048035 | 0        |
| CHID1   | 2,736  | 5.46   | 19.27  | 3.529304029 | 0        |
| CHM     | 5,442  | 0.69   | 2.00   | 2.898550725 | 6.85E-10 |
| CHMP4A  | 1,505  | 8.48   | 27.81  | 3.279481132 | 0        |
| CHMP6   | 1.61   | 2.83   | 14.18  | 5.010600707 | 0        |
| CHMP7   | 3,386  | 2.89   | 7.94   | 2.747404844 | 0        |
| CHRAC1  | 2,497  | 5.31   | 10.93  | 2.058380414 | 3.14E-13 |
| CHRNA1  | 2.04   | 4.22   | 79.28  | 18.78672986 | 0        |
| CHRNB4  | 2,448  | 1.25   | 13.84  | 11.072      | 0        |
| CHRNE   | 2,463  | 2.09   | 6.30   | 3.014354067 | 3.00E-14 |
| CHST10  | 2,815  | 1.69   | 5.47   | 3.236686391 | 3.00E-15 |
| CHST11  | 1,656  | 11.06  | 40.85  | 3.693490054 | 0        |
| CHST12  | 4,206  | 2.56   | 8.49   | 3.31640625  | 0        |
| CHST7   | 3,186  | 3.29   | 6.97   | 2.118541033 | 9.31E-12 |
| CIAPIN1 | 2,106  | 8.83   | 19.60  | 2.219705549 | 0        |
| CIDEB   | 2,242  | 8.87   | 28.32  | 3.192784667 | 0        |
| CINP    | 0.979  | 5.56   | 16.69  | 3.001798561 | 7.00E-15 |
| CIRH1A  | 2,192  | 6.41   | 19.64  | 3.063962559 | 0        |
| CISH    | 2,017  | 8.24   | 42.10  | 5.109223301 | 0        |
| CIT     | 8,576  | 0.73   | 3.99   | 5.465753425 | 0        |
| CITED4  | 1,291  | 7.89   | 34.84  | 4.415716096 | 0        |
| CKAP2   | 3,626  | 3.55   | 10.41  | 2.932394366 | 0        |
| CKAP2L  | 3,205  | 0.56   | 3.76   | 6.714285714 | 0        |
| CKAP5   | 6,698  | 5.40   | 15.42  | 2.855555556 | 0        |
| CKLF    | 1,313  | 5.57   | 72.17  | 12.95691203 | 0        |
| CKS2    | 0.613  | 14.85  | 58.26  | 3.923232323 | 0        |
| CLCN3   | 5,151  | 0.75   | 4.91   | 6.546666667 | 0        |
| CLDN15  | 4,482  | 1.92   | 6.08   | 3.166666667 | 0        |
| CLEC11A | 1,407  | 124.04 | 477.04 | 3.845856175 | 0        |
| CLEC14A | 2,256  | 38.02  | 101.26 | 2.663335087 | 0        |
| CLIP2   | 11.11  | 3.61   | 17.91  | 4.961218837 | 0        |
| CLIP3   | 3,349  | 0.68   | 2.67   | 3.926470588 | 3.12E-11 |
| CLK2    | 2,737  | 10.08  | 24.90  | 2.470238095 | 0        |
| CLK2P   | 26,923 | 0.12   | 0.43   | 3.583333333 | 2.98E-13 |
| CLN6    | 2,187  | 9.46   | 31.04  | 3.281183932 | 0        |
| CLNS1A  | 1,366  | 13.18  | 37.19  | 2.821699545 | 0        |

|         |        |       |        |             |          |
|---------|--------|-------|--------|-------------|----------|
| CLPB    | 3,116  | 1.30  | 8.86   | 6.815384615 | 0        |
| CLPP    | 1,151  | 21.31 | 56.35  | 2.644298451 | 0        |
| CLPTM1  | 2,469  | 14.95 | 41.76  | 2.793311037 | 0        |
| CLPTM1L | 2,148  | 10.45 | 70.59  | 6.755023923 | 0        |
| CLSTN1  | 6.93   | 33.41 | 83.83  | 2.509129003 | 0        |
| CLTB    | 1,725  | 19.55 | 55.73  | 2.850639386 | 0        |
| CLUAP1  | 3,219  | 0.71  | 4.11   | 5.788732394 | 0        |
| CMAS    | 1,741  | 3.41  | 8.23   | 2.413489736 | 6.95E-10 |
| CMBL    | 4,047  | 1.06  | 7.74   | 7.301886792 | 0        |
| CMIP    | 4,382  | 7.39  | 18.40  | 2.48985115  | 0        |
| CMTM2   | 1,063  | 1.58  | 39.56  | 25.03797468 | 0        |
| CMTM3   | 2,563  | 17.33 | 71.45  | 4.122908252 | 0        |
| CNDP2   | 2,949  | 13.85 | 57.81  | 4.17400722  | 0        |
| CNNM3   | 4,916  | 3.02  | 7.86   | 2.602649007 | 0        |
| CNOT10  | 2,741  | 2.75  | 9.81   | 3.567272727 | 0        |
| CNOT3   | 2,855  | 10.33 | 31.93  | 3.090997096 | 0        |
| CNP     | 5,222  | 5.71  | 19.32  | 3.383537653 | 0        |
| CNR2    | 1,775  | 1.56  | 8.40   | 5.384615385 | 0        |
| COBRA1  | 2,372  | 11.97 | 34.45  | 2.878028404 | 0        |
| COG2    | 2,901  | 0.89  | 6.85   | 7.696629213 | 0        |
| COG4    | 2,797  | 4.04  | 22.68  | 5.613861386 | 0        |
| COG6    | 3,427  | 0.35  | 4.33   | 12.37142857 | 0        |
| COG8    | 2,482  | 4.59  | 13.61  | 2.965141612 | 0        |
| COL27A1 | 5,583  | 0.89  | 2.63   | 2.95505618  | 2.59E-13 |
| COL6A3  | 10,658 | 3.97  | 24.47  | 6.16372796  | 0        |
| COMMD10 | 1,427  | 1.73  | 5.97   | 3.450867052 | 1.48E-09 |
| COMMD4  | 0.925  | 12.72 | 30.14  | 2.369496855 | 0        |
| COMMD7  | 1,464  | 11.22 | 36.65  | 3.266488414 | 0        |
| COMT    | 1,559  | 12.06 | 85.37  | 7.078772803 | 0        |
| COP1    | 1,152  | 16.06 | 42.85  | 2.668119552 | 0        |
| COPB2   | 3,062  | 13.02 | 26.68  | 2.049155146 | 0        |
| COPE    | 2,371  | 40.10 | 143.89 | 3.588279302 | 0        |
| COPG    | 3,074  | 18.34 | 38.75  | 2.112868048 | 0        |
| COPG2   | 3,405  | 2.12  | 6.76   | 3.188679245 | 0        |
| COPS4   | 1,748  | 5.55  | 14.36  | 2.587387387 | 0        |
| COPS6   | 2,852  | 5.20  | 22.15  | 4.259615385 | 0        |
| COPS7A  | 1,795  | 4.03  | 21.92  | 5.439205955 | 0        |

|         |       |       |        |             |          |
|---------|-------|-------|--------|-------------|----------|
| COPS7B  | 1,977 | 9.46  | 28.88  | 3.052854123 | 0        |
| COPZ1   | 1,897 | 19.24 | 67.89  | 3.528586279 | 0        |
| COQ2    | 1,538 | 0.77  | 5.42   | 7.038961039 | 2.00E-15 |
| COQ5    | 1,496 | 4.23  | 19.43  | 4.593380615 | 0        |
| COQ7    | 2,588 | 0.68  | 4.00   | 5.882352941 | 0        |
| COQ9    | 1,616 | 2.20  | 23.35  | 10.61363636 | 0        |
| CORO1A  | 3,645 | 57.19 | 166.70 | 2.914845253 | 0        |
| CORO1B  | 2,012 | 14.35 | 46.43  | 3.23554007  | 0        |
| COVA1   | 4,319 | 0.48  | 5.71   | 11.89583333 | 0        |
| COX10   | 3     | 1.42  | 4.72   | 3.323943662 | 1.30E-14 |
| COX11   | 2,703 | 1.29  | 5.01   | 3.88372093  | 0        |
| COX15   | 5,706 | 1.04  | 4.67   | 4.490384615 | 0        |
| COX17   | 0.423 | 6.08  | 30.27  | 4.978618421 | 0        |
| COX4NB  | 1,911 | 4.56  | 10.18  | 2.23245614  | 2.78E-11 |
| COX5A   | 0.644 | 44.40 | 145.32 | 3.272972973 | 0        |
| COX5AP2 | 0.571 | 2.59  | 11.36  | 4.386100386 | 1.07E-09 |
| COX6B1  | 0.558 | 96.81 | 243.19 | 2.512033881 | 0        |
| CPNE1   | 2.89  | 24.37 | 75.33  | 3.091095609 | 0        |
| CPNE2   | 3,932 | 25.86 | 111.35 | 4.305877804 | 0        |
| CPNE5   | 3,339 | 0.29  | 2.42   | 8.344827586 | 0        |
| CPOX    | 2,695 | 0.62  | 4.25   | 6.85483871  | 0        |
| CPSF2   | 5,041 | 1.10  | 5.78   | 5.254545455 | 0        |
| CPSF3   | 2,171 | 8.16  | 19.32  | 2.367647059 | 0        |
| CPT1A   | 4,531 | 15.59 | 32.64  | 2.093649775 | 0        |
| CPT2    | 3,092 | 1.40  | 5.83   | 4.164285714 | 0        |
| CPVL    | 3,776 | 1.47  | 5.24   | 3.56462585  | 0        |
| CPXM1   | 2.39  | 16.06 | 36.69  | 2.284557908 | 0        |
| CRADD   | 1,422 | 20.66 | 63.11  | 3.054695063 | 0        |
| CRAT    | 3,195 | 3.13  | 6.99   | 2.233226837 | 7.88E-13 |
| CREB3   | 1,851 | 4.06  | 9.06   | 2.231527094 | 6.36E-10 |
| CREB3L1 | 2,338 | 0.98  | 31.85  | 32.5        | 0        |
| CREB3L4 | 1,747 | 3.29  | 17.22  | 5.234042553 | 0        |
| CREBL1  | 5,238 | 8.20  | 30.03  | 3.662195122 | 0        |
| CREBL2  | 3,748 | 0.92  | 4.25   | 4.619565217 | 0        |
| CRELD1  | 2,991 | 3.17  | 10.87  | 3.429022082 | 0        |
| CRELD2  | 3,624 | 19.71 | 45.44  | 2.305428716 | 0        |
| CRLS1   | 1,155 | 1.80  | 6.64   | 3.688888889 | 2.84E-09 |

|              |       |       |        |             |          |
|--------------|-------|-------|--------|-------------|----------|
| CRSP8        | 1,384 | 5.72  | 14.55  | 2.543706294 | 2.10E-14 |
| CRTAP        | 6,622 | 10.07 | 26.78  | 2.65938431  | 0        |
| CRTC1        | 3,216 | 2.37  | 7.33   | 3.092827004 | 0        |
| CRYL1        | 1,528 | 3.82  | 13.17  | 3.447643979 | 0        |
| CRYZ         | 1,887 | 1.73  | 6.12   | 3.537572254 | 6.67E-13 |
| CSF1R        | 6,391 | 8.62  | 33.62  | 3.900232019 | 0        |
| CSK          | 2,416 | 20.89 | 77.90  | 3.729056965 | 0        |
| CSRP1        | 1,817 | 7.84  | 40.19  | 5.12627551  | 0        |
| CSRP2BP      | 4,259 | 0.79  | 5.48   | 6.936708861 | 0        |
| CSTB         | 0.658 | 28.12 | 229.28 | 8.153627312 | 0        |
| CSTF2        | 2,017 | 2.01  | 5.89   | 2.930348259 | 7.11E-11 |
| CSTF3        | 3,711 | 1.73  | 5.81   | 3.358381503 | 0        |
| CTA-126B4.3  | 1,205 | 13.87 | 54.04  | 3.896178803 | 0        |
| CTA-216E10.6 | 4,975 | 1.14  | 3.86   | 3.385964912 | 0        |
| CTBP1        | 5.73  | 19.52 | 63.93  | 3.275102459 | 0        |
| CTCF         | 3,787 | 8.88  | 27.45  | 3.091216216 | 0        |
| CTDSP1       | 2.74  | 23.72 | 48.08  | 2.02698145  | 0        |
| CTDSPL       | 4,455 | 10.77 | 38.20  | 3.546889508 | 0        |
| CTF1         | 1,664 | 0.71  | 5.27   | 7.422535211 | 0        |
| CTF8         | 3,538 | 3.78  | 37.50  | 9.920634921 | 0        |
| CTHRC1       | 1.22  | 9.24  | 54.82  | 5.932900433 | 0        |
| CTNNA1       | 3,761 | 19.42 | 39.02  | 2.009268795 | 0        |
| CTNNBL1      | 1,888 | 9.28  | 24.89  | 2.682112069 | 0        |
| CTNS         | 4,186 | 15.53 | 31.48  | 2.02704443  | 0        |
| CTPS         | 2,756 | 11.09 | 44.41  | 4.004508566 | 0        |
| CTR9         | 4,317 | 1.70  | 11.82  | 6.952941176 | 0        |
| CTSA         | 1,814 | 7.80  | 43.28  | 5.548717949 | 0        |
| CTSB         | 4,064 | 30.33 | 77.06  | 2.54071876  | 0        |
| CTSC         | 7,619 | 1.20  | 25.94  | 21.61666667 | 0        |
| CTSD         | 2.12  | 28.33 | 82.96  | 2.928344511 | 0        |
| CTSG         | 0.924 | 5.67  | 14.50  | 2.557319224 | 4.74E-10 |
| CTSO         | 2,933 | 1.58  | 6.66   | 4.215189873 | 0        |
| CTSW         | 1,294 | 6.96  | 16.08  | 2.310344828 | 7.05E-13 |
| CUEDC1       | 2,193 | 1.35  | 13.23  | 9.8         | 0        |
| CUEDC2       | 1,122 | 22.31 | 50.90  | 2.281488122 | 0        |
| CUL7         | 5,471 | 2.93  | 7.71   | 2.631399317 | 0        |
| CUTA         | 2,871 | 11.34 | 30.84  | 2.71957672  | 0        |

|           |       |       |        |              |          |
|-----------|-------|-------|--------|--------------|----------|
| CUTC      | 1,318 | 3.00  | 8.24   | 2.746666667  | 3.63E-09 |
| CUTL2     | 6,841 | 0.06  | 1.84   | 30.666666667 | 0        |
| CX3CR1    | 3,108 | 0.51  | 4.15   | 8.137254902  | 0        |
| CXCR3     | 1,624 | 6.83  | 23.70  | 3.469985359  | 0        |
| CXorf12   | 1,411 | 0.70  | 6.63   | 9.471428571  | 0        |
| CXorf15   | 2,045 | 1.40  | 4.61   | 3.292857143  | 3.46E-10 |
| CXorf21   | 1,808 | 5.36  | 23.11  | 4.311567164  | 0        |
| CXorf34   | 3,325 | 2.23  | 5.14   | 2.304932735  | 8.98E-11 |
| CXorf9    | 2,626 | 13.41 | 116.25 | 8.668903803  | 0        |
| CXXC1     | 2,444 | 10.77 | 31.57  | 2.931290622  | 0        |
| CXXC5     | 2,589 | 1.56  | 23.68  | 15.17948718  | 0        |
| CYB561D2  | 1,204 | 3.54  | 10.08  | 2.847457627  | 8.59E-11 |
| CYB5A     | 1,206 | 1.56  | 19.98  | 12.80769231  | 0        |
| CYB5B     | 4,286 | 3.93  | 10.42  | 2.651399491  | 0        |
| CYB5R1    | 1,643 | 6.27  | 13.69  | 2.183413078  | 1.71E-12 |
| CYB5R3    | 2,209 | 39.14 | 100.52 | 2.568216658  | 0        |
| CYBA      | 4,222 | 57.55 | 330.94 | 5.750477845  | 0        |
| CYBASC3   | 2,959 | 9.13  | 31.69  | 3.470974808  | 0        |
| CYBB      | 4,268 | 2.92  | 21.69  | 7.428082192  | 0        |
| CYBRD1    | 4,236 | 0.98  | 3.44   | 3.510204082  | 1.00E-15 |
| CYC1      | 1,171 | 17.40 | 56.40  | 3.24137931   | 0        |
| CYHR1     | 1.19  | 4.57  | 15.50  | 3.391684902  | 0        |
| CYP4V2    | 4,699 | 0.80  | 4.27   | 5.3375       | 0        |
| CYSLTR1   | 1,514 | 2.68  | 13.92  | 5.194029851  | 0        |
| CYTL1     | 1,001 | 9.39  | 51.50  | 5.48455804   | 0        |
| D21S2056E | 2,985 | 2.22  | 11.82  | 5.324324324  | 0        |
| D4ST1     | 2,142 | 2.36  | 15.10  | 6.398305085  | 0        |
| DAAM1     | 4,256 | 1.51  | 5.06   | 3.350993377  | 0        |
| DAB2      | 3,257 | 2.40  | 10.10  | 4.208333333  | 0        |
| DAB2IP    | 5,906 | 1.34  | 2.88   | 2.149253731  | 2.19E-09 |
| DAD1      | 0.683 | 11.87 | 85.47  | 7.200505476  | 0        |
| DALRD3    | 2,684 | 5.64  | 15.00  | 2.659574468  | 0        |
| DAP       | 2.23  | 17.22 | 46.01  | 2.671893148  | 0        |
| DARS      | 2,322 | 7.63  | 20.90  | 2.739187418  | 0        |
| DARS2     | 3,187 | 0.71  | 4.78   | 6.732394366  | 0        |
| DAZAP1    | 8.06  | 19.72 | 43.11  | 2.186105477  | 0        |
| DBI       | 0.7   | 29.54 | 60.65  | 2.053148274  | 0        |



|         |       |       |        |             |          |
|---------|-------|-------|--------|-------------|----------|
| DBN1    | 3,615 | 4.41  | 51.08  | 11.58276644 | 0        |
| DBNDD1  | 2,075 | 1.39  | 12.59  | 9.057553957 | 0        |
| DBNDD2  | 4,302 | 1.77  | 6.13   | 3.463276836 | 0        |
| DBNL    | 4,354 | 8.43  | 27.46  | 3.257413998 | 0        |
| DBP     | 1,467 | 1.22  | 6.89   | 5.647540984 | 0        |
| DC2     | 1.08  | 16.21 | 48.36  | 2.983343615 | 0        |
| DCAKD   | 2.03  | 3.85  | 21.54  | 5.594805195 | 0        |
| DCI     | 1,029 | 9.04  | 23.00  | 2.544247788 | 0        |
| DCLRE1B | 3,651 | 0.92  | 2.56   | 2.782608696 | 1.22E-08 |
| DGP1B   | 2,092 | 0.85  | 6.60   | 7.764705882 | 0        |
| DCPS    | 1,479 | 2.54  | 8.32   | 3.275590551 | 1.13E-12 |
| DCTN1   | 5,011 | 11.25 | 41.23  | 3.664888889 | 0        |
| DCUN1D5 | 1,249 | 5.07  | 11.80  | 2.327416174 | 1.48E-09 |
| DCXR    | 0.829 | 6.68  | 29.64  | 4.437125749 | 0        |
| DDEF2   | 5,711 | 1.19  | 3.99   | 3.352941176 | 0        |
| DDOST   | 2,345 | 42.19 | 100.10 | 2.372600142 | 0        |
| DDT     | 0.666 | 29.86 | 59.95  | 2.007702612 | 0        |
| DDX1    | 2,706 | 5.38  | 21.54  | 4.003717472 | 0        |
| DDX10   | 3,193 | 2.88  | 8.39   | 2.913194444 | 0        |
| DDX18   | 3,765 | 4.68  | 10.77  | 2.301282051 | 0        |
| DDX23   | 3,267 | 6.02  | 30.14  | 5.006644518 | 0        |
| DDX31   | 3,786 | 1.12  | 3.71   | 3.3125      | 1.40E-14 |
| DDX41   | 2,104 | 19.61 | 40.64  | 2.072412035 | 0        |
| DDX49   | 1.82  | 13.92 | 32.90  | 2.363505747 | 0        |
| DEAF1   | 2,716 | 16.14 | 52.98  | 3.282527881 | 0        |
| DECR1   | 1,251 | 7.59  | 20.20  | 2.661396574 | 0        |
| DEFA1   | 0.486 | 3.26  | 15.08  | 4.625766871 | 1.11E-10 |
| DEFA4   | 0.542 | 6.21  | 24.86  | 4.003220612 | 0        |
| DENND2D | 2,042 | 2.23  | 12.25  | 5.493273543 | 0        |
| DERA    | 1,528 | 4.53  | 11.52  | 2.543046358 | 9.57E-13 |
| DERL3   | 5,753 | 1.12  | 2.98   | 2.660714286 | 3.06E-13 |
| DFFA    | 4,732 | 1.48  | 8.27   | 5.587837838 | 0        |
| DFFB    | 5,528 | 0.25  | 1.40   | 5.6         | 1.85E-12 |
| DFNA5   | 4,436 | 1.74  | 42.21  | 24.25862069 | 0        |
| DGCR2   | 4,418 | 4.50  | 14.81  | 3.291111111 | 0        |
| DGCR6L  | 1,159 | 12.47 | 40.49  | 3.246992783 | 0        |
| DGKZ    | 4,111 | 6.93  | 19.04  | 2.747474747 | 0        |

|               |       |       |        |             |          |
|---------------|-------|-------|--------|-------------|----------|
| DGUOK         | 1,144 | 7.18  | 22.97  | 3.199164345 | 0        |
| DHCR7         | 2,584 | 2.11  | 5.77   | 2.734597156 | 3.15E-12 |
| DHFR          | 3,917 | 0.91  | 11.74  | 12.9010989  | 0        |
| DHODH         | 3,132 | 0.53  | 3.84   | 7.245283019 | 0        |
| DHPS          | 1,476 | 8.84  | 27.85  | 3.150452489 | 0        |
| DHRS1         | 1.47  | 2.36  | 7.22   | 3.059322034 | 1.95E-10 |
| DHRS13        | 1,908 | 1.04  | 9.41   | 9.048076923 | 0        |
| DHRS4         | 1,278 | 5.42  | 20.30  | 3.745387454 | 0        |
| DHRS4L2       | 1,269 | 3.28  | 10.75  | 3.277439024 | 7.10E-14 |
| DHRSX         | 2,537 | 1.68  | 5.51   | 3.279761905 | 4.40E-14 |
| DHTKD1        | 5,159 | 1.92  | 6.30   | 3.28125     | 0        |
| DHX32         | 3.07  | 0.42  | 2.52   | 6           | 3.37E-13 |
| DHX33         | 4,076 | 1.22  | 4.07   | 3.336065574 | 0        |
| DHX34         | 5.17  | 0.92  | 5.04   | 5.47826087  | 0        |
| DIMT1L        | 1,557 | 5.91  | 13.18  | 2.230118443 | 6.86E-12 |
| DIS3L         | 3,658 | 1.43  | 7.44   | 5.202797203 | 0        |
| DKC1          | 2,454 | 16.65 | 33.81  | 2.030630631 | 0        |
| DKFZp434K1815 | 4,396 | 2.12  | 4.35   | 2.051886792 | 1.07E-09 |
| DKFZp451A211  | 5.11  | 0.21  | 3.29   | 15.66666667 | 0        |
| DKFZp667G2110 | 4,785 | 1.37  | 3.01   | 2.197080292 | 1.45E-08 |
| DKFZp762E1312 | 3.05  | 2.18  | 6.27   | 2.876146789 | 0        |
| DLAT          | 3.3   | 1.08  | 6.53   | 6.046296296 | 0        |
| DLG4          | 3,984 | 5.94  | 12.77  | 2.14983165  | 0        |
| DLG7          | 2,979 | 0.04  | 5.43   | 135.75      | 0        |
| DLL3          | 2,644 | 0.00  | 10.22  | 10.22       | 0        |
| DMAP1         | 2,143 | 12.79 | 27.84  | 2.176700547 | 0        |
| DMWD          | 3,308 | 2.30  | 5.60   | 2.434782609 | 1.16E-12 |
| DNAJA3        | 2,687 | 2.47  | 14.89  | 6.028340081 | 0        |
| DNAJA4        | 3,175 | 2.77  | 9.34   | 3.371841155 | 0        |
| DNAJA5        | 6,208 | 1.91  | 4.27   | 2.235602094 | 4.00E-15 |
| DNAJC1        | 1,881 | 0.74  | 4.84   | 6.540540541 | 0        |
| DNAJC11       | 3,197 | 4.43  | 10.72  | 2.41986456  | 0        |
| DNAJC13       | 7,595 | 1.82  | 4.42   | 2.428571429 | 0        |
| DNAJC8        | 1,479 | 23.21 | 63.51  | 2.736320551 | 0        |
| DNAJC8P1      | 1,577 | 2.07  | 10.04  | 4.850241546 | 0        |
| DNAL4         | 1,487 | 2.66  | 13.37  | 5.026315789 | 0        |
| DNAPTP6       | 2,336 | 32.32 | 177.60 | 5.495049505 | 0        |

|         |       |        |        |             |          |
|---------|-------|--------|--------|-------------|----------|
| DNASE1  | 3,098 | 0.42   | 2.67   | 6.357142857 | 1.50E-14 |
| DNMT1   | 5,408 | 7.76   | 20.22  | 2.605670103 | 0        |
| DNMT3A  | 5,906 | 3.16   | 10.23  | 3.237341772 | 0        |
| DNMT3B  | 4,778 | 1.14   | 2.84   | 2.49122807  | 7.12E-10 |
| DNTT    | 2.61  | 115.31 | 538.74 | 4.672101292 | 0        |
| DOCK10  | 4,274 | 2.76   | 5.89   | 2.134057971 | 4.20E-13 |
| DOCK8   | 7,233 | 6.22   | 25.48  | 4.096463023 | 0        |
| DOK1    | 1.89  | 2.35   | 17.16  | 7.30212766  | 0        |
| DOK3    | 1,724 | 12.40  | 30.41  | 2.452419355 | 0        |
| DOK4    | 2,689 | 3.64   | 33.74  | 9.269230769 | 0        |
| DOLPP1  | 2,153 | 0.69   | 7.08   | 10.26086957 | 0        |
| DPAGT1  | 2,937 | 1.69   | 16.89  | 9.99408284  | 0        |
| DPF2    | 2,409 | 14.66  | 37.98  | 2.590723056 | 0        |
| DPH2    | 2,497 | 2.45   | 13.90  | 5.673469388 | 0        |
| DPM2    | 0.91  | 4.13   | 40.92  | 9.907990315 | 0        |
| DPM3    | 0.831 | 7.50   | 19.97  | 2.662666667 | 5.59E-13 |
| DPP3    | 2,692 | 4.37   | 18.50  | 4.233409611 | 0        |
| DPP4    | 3.9   | 0.59   | 2.18   | 3.694915254 | 2.88E-10 |
| DPP7    | 2,121 | 47.86  | 99.45  | 2.077935646 | 0        |
| DPY19L1 | 9.73  | 0.35   | 1.45   | 4.142857143 | 0        |
| DPYSL2  | 4.54  | 16.15  | 50.75  | 3.142414861 | 0        |
| DRAP1   | 0.988 | 19.73  | 63.69  | 3.228079067 | 0        |
| DRG1    | 1.45  | 13.44  | 27.02  | 2.010416667 | 0        |
| DRG2    | 1,888 | 8.91   | 20.97  | 2.353535354 | 0        |
| DSCR3   | 3,251 | 3.40   | 8.04   | 2.364705882 | 0        |
| DSTN    | 2,312 | 1.97   | 10.96  | 5.563451777 | 0        |
| DTX1    | 3,288 | 2.62   | 8.79   | 3.354961832 | 0        |
| DTX2    | 5,538 | 0.37   | 2.56   | 6.918918919 | 0        |
| DTX3    | 2,029 | 1.51   | 4.69   | 3.105960265 | 1.39E-09 |
| DTYMK   | 1,053 | 3.76   | 22.16  | 5.893617021 | 0        |
| DUSP14  | 1,455 | 3.13   | 12.10  | 3.865814696 | 0        |
| DUSP16  | 3,566 | 1.16   | 3.64   | 3.137931034 | 5.96E-13 |
| DUSP23  | 0.685 | 3.90   | 27.30  | 7           | 0        |
| DUSP3   | 4.1   | 2.63   | 11.42  | 4.342205323 | 0        |
| DUSP6   | 2.82  | 9.79   | 126.18 | 12.8886619  | 0        |
| DUSP7   | 1,239 | 4.71   | 35.12  | 7.456475584 | 0        |
| DVL2    | 3,016 | 7.31   | 20.05  | 2.742818057 | 0        |

|          |       |        |        |             |          |
|----------|-------|--------|--------|-------------|----------|
| DYNC112  | 2,602 | 5.48   | 17.22  | 3.142335766 | 0        |
| DYNLL1   | 0.99  | 3.80   | 114.53 | 30.13947368 | 0        |
| DYNLRB1  | 0.685 | 27.88  | 123.59 | 4.432926829 | 0        |
| DYRK1B   | 2,767 | 2.76   | 9.31   | 3.373188406 | 0        |
| DYRK4    | 1,845 | 2.95   | 7.12   | 2.413559322 | 4.06E-09 |
| DZIP3    | 5,295 | 0.26   | 1.50   | 5.769230769 | 1.22E-13 |
| E2F2     | 5,192 | 4.94   | 10.71  | 2.168016194 | 0        |
| E2F4     | 2.1   | 18.23  | 39.15  | 2.147558969 | 0        |
| E4F1     | 2,573 | 6.58   | 14.11  | 2.1443769   | 0        |
| EARS2    | 3,841 | 1.34   | 4.47   | 3.335820896 | 0        |
| EBNA1BP2 | 1,322 | 4.04   | 25.94  | 6.420792079 | 0        |
| EBP      | 1,064 | 14.78  | 32.38  | 2.190798376 | 0        |
| ECEL1    | 2,858 | 15.68  | 39.85  | 2.541454082 | 0        |
| ECH1     | 1,263 | 17.71  | 103.51 | 5.844720497 | 0        |
| ECHDC1   | 2,257 | 3.02   | 9.55   | 3.162251656 | 0        |
| ECHS1    | 1,516 | 16.71  | 48.91  | 2.926989826 | 0        |
| ECM1     | 1,819 | 245.19 | 717.13 | 2.924793018 | 0        |
| ECOP     | 5.78  | 2.11   | 4.40   | 2.085308057 | 9.94E-13 |
| EDARADD  | 3,017 | 5.80   | 19.37  | 3.339655172 | 0        |
| EDC3     | 3,739 | 1.72   | 14.37  | 8.354651163 | 0        |
| EDEM2    | 1,885 | 5.93   | 20.83  | 3.512647555 | 0        |
| EDF1     | 1,146 | 78.82  | 277.51 | 3.520806902 | 0        |
| EEF1B2   | 1,289 | 189.20 | 385.57 | 2.037896406 | 0        |
| EEFSEC   | 2,216 | 2.14   | 9.20   | 4.299065421 | 0        |
| EFHD2    | 2,365 | 25.02  | 75.12  | 3.002398082 | 0        |
| EFNA3    | 1,782 | 0.55   | 3.83   | 6.963636364 | 2.04E-13 |
| EFNB1    | 3,336 | 6.08   | 19.34  | 3.180921053 | 0        |
| EFNB2    | 4,322 | 3.25   | 7.64   | 2.350769231 | 0        |
| EFTUD1   | 3,562 | 0.28   | 4.21   | 15.03571429 | 0        |
| EFTUD2   | 3,717 | 13.15  | 29.14  | 2.215969582 | 0        |
| EGR1     | 3,136 | 4.17   | 10.61  | 2.544364508 | 0        |
| EHBP1    | 5,032 | 0.92   | 2.83   | 3.076086957 | 7.80E-14 |
| EHD3     | 3,583 | 4.06   | 16.90  | 4.162561576 | 0        |
| EHD4     | 2,881 | 1.72   | 20.22  | 11.75581395 | 0        |
| EID1     | 2,091 | 24.13  | 54.50  | 2.258599254 | 0        |
| EIF2AK1  | 5,594 | 10.88  | 29.03  | 2.668198529 | 0        |
| EIF2B2   | 1,539 | 5.65   | 13.41  | 2.373451327 | 1.73E-13 |

|           |        |        |        |             |          |
|-----------|--------|--------|--------|-------------|----------|
| EIF2B3    | 1,659  | 1.61   | 14.37  | 8.925465839 | 0        |
| EIF2C1    | 7,478  | 1.76   | 5.08   | 2.886363636 | 0        |
| EIF2S1    | 4,165  | 3.35   | 10.44  | 3.11641791  | 0        |
| EIF3S4    | 2.07   | 93.68  | 250.98 | 2.67912041  | 0        |
| EIF4A1    | 2,602  | 47.75  | 140.27 | 2.937591623 | 0        |
| EIF4A3    | 1,686  | 9.04   | 34.47  | 3.813053097 | 0        |
| EIF4EBP1  | 0.844  | 8.09   | 45.41  | 5.613102596 | 0        |
| EIF4ENIF1 | 3,521  | 3.17   | 9.07   | 2.861198738 | 0        |
| EIF4G1    | 6,388  | 17.69  | 40.84  | 2.308648954 | 0        |
| EIF4G2    | 4,886  | 57.63  | 123.93 | 2.150442478 | 0        |
| EIF4G3    | 5,793  | 9.05   | 19.34  | 2.137016575 | 0        |
| EIF5A     | 1,234  | 38.56  | 127.18 | 3.298236515 | 0        |
| EIF5B     | 4,698  | 9.88   | 22.89  | 2.316801619 | 0        |
| ELA2      | 0.924  | 9.31   | 19.05  | 2.046186896 | 3.83E-09 |
| ELAC1     | 2,233  | 0.40   | 3.62   | 9.05        | 0        |
| ELAC2     | 2,968  | 7.43   | 16.68  | 2.244952894 | 0        |
| ELAVL1    | 6,058  | 4.36   | 15.47  | 3.548165138 | 0        |
| ELK3      | 3,155  | 24.96  | 56.49  | 2.263221154 | 0        |
| ELOF1     | 1,019  | 9.90   | 35.55  | 3.590909091 | 0        |
| ELOVL1    | 1,483  | 18.82  | 62.77  | 3.335281615 | 0        |
| ELOVL2    | 4,027  | 0.91   | 11.06  | 12.15384615 | 0        |
| ELP3      | 3,074  | 1.71   | 8.61   | 5.035087719 | 0        |
| ELP4      | 1,567  | 1.14   | 5.06   | 4.438596491 | 2.92E-11 |
| EMG1      | 0.996  | 8.94   | 31.37  | 3.508948546 | 0        |
| EMILIN1   | 3,431  | 1.35   | 18.27  | 13.53333333 | 0        |
| EML2      | 2,248  | 2.60   | 11.58  | 4.453846154 | 0        |
| EMP2      | 2,266  | 6.68   | 14.70  | 2.200598802 | 0        |
| ENAH      | 13,172 | 0.55   | 3.25   | 5.909090909 | 0        |
| ENDOD1    | 4,693  | 3.31   | 10.48  | 3.166163142 | 0        |
| ENDOG     | 1,145  | 1.72   | 10.96  | 6.372093023 | 0        |
| ENO1      | 2.05   | 135.61 | 605.74 | 4.466779736 | 0        |
| ENO1P     | 1,825  | 13.71  | 53.45  | 3.89861415  | 0        |
| ENOPH1    | 1,973  | 3.26   | 14.13  | 4.334355828 | 0        |
| ENOSF1    | 1,778  | 3.67   | 8.63   | 2.351498638 | 4.09E-10 |
| EPB42     | 2,696  | 0.29   | 2.72   | 9.379310345 | 0        |
| EPDR1     | 5,198  | 0.08   | 1.34   | 16.75       | 0        |
| EPHA2     | 3,946  | 0.03   | 5.93   | 197.6666667 | 0        |

|         |       |       |        |             |          |
|---------|-------|-------|--------|-------------|----------|
| EPHA4   | 6,348 | 1.22  | 6.13   | 5.024590164 | 0        |
| EPHB3   | 4.22  | 0.84  | 4.35   | 5.178571429 | 0        |
| EPR1    | 1,286 | 2.08  | 11.92  | 5.730769231 | 0        |
| EPRS    | 5,015 | 7.02  | 17.68  | 2.518518519 | 0        |
| EPS15L1 | 2,774 | 5.28  | 11.34  | 2.147727273 | 0        |
| ERAF    | 0.506 | 1.37  | 21.14  | 15.43065693 | 0        |
| ERAL1   | 1,825 | 8.46  | 28.15  | 3.327423168 | 0        |
| ERBB2   | 5,279 | 4.74  | 18.45  | 3.892405063 | 0        |
| ERCC1   | 1,583 | 15.44 | 46.24  | 2.994818653 | 0        |
| ERCC2   | 2,355 | 3.74  | 14.52  | 3.882352941 | 0        |
| ERGIC1  | 6,673 | 17.08 | 40.52  | 2.37236534  | 0        |
| ERGIC3  | 1,856 | 81.56 | 172.97 | 2.120769985 | 0        |
| ERP29   | 2,805 | 85.14 | 196.53 | 2.308315715 | 0        |
| ESPL1   | 6,532 | 0.53  | 3.11   | 5.867924528 | 0        |
| ETFA    | 1,402 | 7.69  | 33.29  | 4.3289987   | 0        |
| ETHE1   | 0.963 | 13.77 | 33.15  | 2.407407407 | 0        |
| EVC     | 6.43  | 0.36  | 1.42   | 3.944444444 | 1.25E-11 |
| EVI5L   | 3,731 | 1.88  | 5.53   | 2.941489362 | 0        |
| EVL     | 1,842 | 30.08 | 140.58 | 4.673537234 | 0        |
| EXDL2   | 2,831 | 1.19  | 5.53   | 4.647058824 | 0        |
| EXOC2   | 4,442 | 1.45  | 4.88   | 3.365517241 | 0        |
| EXOC5   | 8,511 | 1.01  | 2.99   | 2.96039604  | 0        |
| EXOC7   | 4.78  | 8.59  | 27.75  | 3.230500582 | 0        |
| EXOSC1  | 1.15  | 6.88  | 16.26  | 2.363372093 | 5.09E-12 |
| EXOSC2  | 1,979 | 4.05  | 10.38  | 2.562962963 | 9.00E-15 |
| EXOSC4  | 0.895 | 4.53  | 21.84  | 4.821192053 | 0        |
| EXOSC7  | 1,013 | 4.88  | 13.47  | 2.760245902 | 1.78E-11 |
| EXOSC8  | 0.959 | 4.03  | 11.42  | 2.833746898 | 9.00E-10 |
| EXT2    | 3,787 | 4.96  | 12.35  | 2.489919355 | 0        |
| EXTL2   | 2,958 | 0.40  | 2.14   | 5.35        | 2.10E-10 |
| EXTL3   | 6,172 | 0.72  | 5.00   | 6.944444444 | 0        |
| F25965  | 0.9   | 0.88  | 7.21   | 8.193181818 | 4.24E-13 |
| F2R     | 3,595 | 7.43  | 19.56  | 2.632570659 | 0        |
| F2RL3   | 2,731 | 0.98  | 3.36   | 3.428571429 | 3.65E-10 |
| FADS2   | 3,149 | 4.84  | 17.50  | 3.615702479 | 0        |
| FAHD2A  | 1,298 | 5.56  | 11.94  | 2.147482014 | 5.66E-09 |
| FAIM3   | 1.95  | 9.69  | 39.57  | 4.083591331 | 0        |

|           |       |       |       |             |          |
|-----------|-------|-------|-------|-------------|----------|
| FAM101B   | 0.871 | 7.39  | 31.31 | 4.236806495 | 0        |
| FAM112B   | 0.769 | 7.33  | 34.07 | 4.648021828 | 0        |
| FAM117A   | 2,361 | 7.96  | 38.78 | 4.871859296 | 0        |
| FAM118A   | 1.69  | 1.64  | 5.48  | 3.341463415 | 8.12E-10 |
| FAM118B   | 1,645 | 0.84  | 7.48  | 8.904761905 | 0        |
| FAM119B   | 5,127 | 0.85  | 2.52  | 2.964705882 | 7.39E-12 |
| FAM120A   | 4,957 | 8.22  | 24.15 | 2.937956204 | 0        |
| FAM120AOS | 3,037 | 5.86  | 15.94 | 2.720136519 | 0        |
| FAM125A   | 1,193 | 8.21  | 20.34 | 2.477466504 | 0        |
| FAM127A   | 1.18  | 3.52  | 18.56 | 5.272727273 | 0        |
| FAM129B   | 4,017 | 2.52  | 16.38 | 6.5         | 0        |
| FAM20B    | 5,942 | 2.57  | 6.16  | 2.39688716  | 0        |
| FAM33A    | 2,693 | 1.73  | 10.42 | 6.023121387 | 0        |
| FAM40A    | 3,262 | 5.91  | 12.24 | 2.07106599  | 0        |
| FAM48A    | 3,356 | 2.86  | 8.63  | 3.017482517 | 0        |
| FAM50B    | 1,618 | 1.40  | 7.39  | 5.278571429 | 0        |
| FAM54B    | 2,099 | 5.00  | 12.08 | 2.416       | 0        |
| FAM55C    | 3,934 | 1.00  | 3.42  | 3.42        | 1.60E-14 |
| FAM62A    | 4,174 | 11.33 | 36.75 | 3.243601059 | 0        |
| FAM79A    | 2,428 | 3.71  | 11.17 | 3.010781671 | 0        |
| FAM89B    | 1,412 | 4.83  | 29.89 | 6.188405797 | 0        |
| FAM96B    | 1,063 | 12.57 | 61.03 | 4.855210819 | 0        |
| FAM98A    | 2,745 | 2.77  | 6.42  | 2.317689531 | 2.44E-11 |
| FAM98C    | 1,204 | 2.88  | 8.53  | 2.961805556 | 1.39E-09 |
| FANCE     | 2,555 | 0.46  | 3.46  | 7.52173913  | 0        |
| FANCF     | 3,309 | 0.90  | 2.80  | 3.111111111 | 2.29E-09 |
| FARP1     | 5.74  | 4.52  | 10.42 | 2.305309735 | 0        |
| FARS2     | 1,698 | 3.96  | 11.17 | 2.820707071 | 1.00E-15 |
| FARSA     | 1,808 | 3.12  | 37.55 | 12.03525641 | 0        |
| FARSB     | 3,118 | 3.43  | 11.05 | 3.221574344 | 0        |
| FASTK     | 3,704 | 3.21  | 6.64  | 2.068535826 | 2.90E-12 |
| FASTKD1   | 2,898 | 1.88  | 5.15  | 2.739361702 | 3.15E-12 |
| FBXL15    | 2,344 | 2.87  | 6.72  | 2.341463415 | 3.01E-10 |
| FBXL19    | 3,312 | 5.35  | 31.99 | 5.979439252 | 0        |
| FBXO18    | 3,798 | 8.54  | 21.56 | 2.524590164 | 0        |
| FBXO22    | 3,907 | 0.74  | 2.52  | 3.405405405 | 8.95E-11 |
| FBXO41    | 7,121 | 1.58  | 4.52  | 2.860759494 | 0        |

|        |        |       |        |             |          |
|--------|--------|-------|--------|-------------|----------|
| FBXO46 | 3,003  | 2.93  | 8.05   | 2.747440273 | 0        |
| FBXO5  | 2,064  | 1.82  | 6.00   | 3.296703297 | 7.44E-13 |
| FBXO6  | 1.52   | 0.78  | 4.49   | 5.756410256 | 1.66E-11 |
| FBXO9  | 5,762  | 2.69  | 5.43   | 2.018587361 | 1.70E-14 |
| FBXW5  | 2,345  | 10.46 | 39.08  | 3.736137667 | 0        |
| FBXW8  | 4,975  | 2.09  | 6.57   | 3.14354067  | 0        |
| FBXW9  | 1,713  | 1.21  | 5.01   | 4.140495868 | 1.20E-11 |
| FCGR2A | 2,411  | 7.51  | 26.35  | 3.508655126 | 0        |
| FCGR2B | 1,888  | 1.20  | 27.08  | 22.56666667 | 0        |
| FCGR2C | 1.56   | 7.36  | 16.20  | 2.201086957 | 4.20E-14 |
| FCGRT  | 2,148  | 81.71 | 242.22 | 2.964386244 | 0        |
| FCHSD2 | 4,339  | 4.38  | 11.26  | 2.570776256 | 0        |
| FDFT1  | 2,985  | 29.40 | 65.00  | 2.210884354 | 0        |
| FDPS   | 1,684  | 15.22 | 40.40  | 2.654402102 | 0        |
| FDXR   | 2,259  | 1.05  | 10.07  | 9.59047619  | 0        |
| FECH   | 3,962  | 1.24  | 4.61   | 3.717741935 | 0        |
| FEN1   | 2,249  | 5.90  | 18.54  | 3.142372881 | 0        |
| FER1L3 | 6,808  | 0.12  | 1.38   | 11.5        | 0        |
| FES    | 2,762  | 5.88  | 19.00  | 3.231292517 | 0        |
| FEZ2   | 1,917  | 2.84  | 9.84   | 3.464788732 | 0        |
| FGD2   | 3,044  | 3.38  | 7.39   | 2.186390533 | 1.71E-12 |
| FGF6   | 0.744  | 1.60  | 16.20  | 10.125      | 0        |
| FGFR1  | 9,532  | 22.02 | 50.02  | 2.271571299 | 0        |
| FGFRL1 | 3,253  | 0.34  | 4.22   | 12.41176471 | 0        |
| FH     | 1.79   | 6.91  | 17.65  | 2.554269175 | 0        |
| FHL3   | 1,704  | 12.83 | 27.39  | 2.134840218 | 0        |
| FIBP   | 1,584  | 11.74 | 36.37  | 3.097955707 | 0        |
| FIZ1   | 2,651  | 1.75  | 7.18   | 4.102857143 | 0        |
| FKBP15 | 4,588  | 6.11  | 13.86  | 2.268412439 | 0        |
| FKBP1A | 2.43   | 22.40 | 91.31  | 4.076339286 | 0        |
| FKBP1C | 16,372 | 0.28  | 0.93   | 3.321428571 | 1.00E-15 |
| FKBP2  | 0.908  | 2.18  | 48.34  | 22.17431193 | 0        |
| FKBP3  | 1,378  | 7.82  | 20.85  | 2.666240409 | 0        |
| FKBP4  | 2,233  | 1.42  | 8.97   | 6.316901408 | 0        |
| FKBP8  | 2,135  | 77.30 | 156.78 | 2.028201811 | 0        |
| FKBP9  | 6,852  | 0.75  | 3.38   | 4.506666667 | 0        |
| FKBPL  | 2,688  | 2.50  | 9.37   | 3.748       | 0        |



|          |        |       |       |             |          |
|----------|--------|-------|-------|-------------|----------|
| FKSG24   | 1,275  | 0.93  | 7.07  | 7.602150538 | 0        |
| FLAD1    | 2,474  | 4.92  | 15.83 | 3.217479675 | 0        |
| FLI1     | 4,325  | 15.33 | 45.57 | 2.97260274  | 0        |
| FLJ10241 | 1,692  | 9.00  | 28.03 | 3.114444444 | 0        |
| FLJ11151 | 2,845  | 0.91  | 4.38  | 4.813186813 | 0        |
| FLJ11171 | 3,956  | 1.48  | 3.72  | 2.513513514 | 1.00E-10 |
| FLJ11286 | 1,911  | 7.20  | 22.28 | 3.094444444 | 0        |
| FLJ12886 | 1,587  | 2.37  | 13.35 | 5.632911392 | 0        |
| FLJ12993 | 1,888  | 0.68  | 9.99  | 14.69117647 | 0        |
| FLJ14668 | 1,787  | 4.98  | 11.74 | 2.357429719 | 1.29E-13 |
| FLJ14803 | 6,712  | 0.78  | 1.87  | 2.397435897 | 6.19E-09 |
| FLJ20035 | 6,015  | 0.29  | 1.52  | 5.24137931  | 1.80E-14 |
| FLJ20254 | 2.7    | 2.05  | 21.50 | 10.48780488 | 0        |
| FLJ20273 | 4,009  | 3.53  | 11.17 | 3.164305949 | 0        |
| FLJ20489 | 1,927  | 10.42 | 23.30 | 2.236084453 | 0        |
| FLJ20699 | 2,566  | 2.08  | 8.34  | 4.009615385 | 0        |
| FLJ20920 | 2,157  | 5.55  | 13.74 | 2.475675676 | 0        |
| FLJ21438 | 3,379  | 12.74 | 38.29 | 3.005494505 | 0        |
| FLJ21767 | 3,804  | 1.27  | 7.55  | 5.94488189  | 0        |
| FLJ21839 | 4,635  | 16.43 | 44.02 | 2.679245283 | 0        |
| FLJ21908 | 2,258  | 2.32  | 5.59  | 2.409482759 | 6.19E-09 |
| FLJ21986 | 10.55  | 0.13  | 0.65  | 5           | 5.14E-11 |
| FLJ22662 | 1,934  | 1.48  | 5.10  | 3.445945946 | 2.62E-11 |
| FLJ35220 | 2,815  | 0.52  | 2.34  | 4.5         | 6.56E-10 |
| FLJ35348 | 5,179  | 1.41  | 6.05  | 4.290780142 | 0        |
| FLJ36208 | 2,044  | 0.87  | 5.64  | 6.482758621 | 0        |
| FLJ38482 | 2,225  | 0.53  | 3.75  | 7.075471698 | 0        |
| FLJ38984 | 2,934  | 0.44  | 5.63  | 12.79545455 | 0        |
| FLJ90757 | 2,088  | 0.57  | 10.98 | 19.26315789 | 0        |
| FLNB     | 9,429  | 11.95 | 31.47 | 2.633472803 | 0        |
| FLOT2    | 2,632  | 15.11 | 51.17 | 3.386499007 | 0        |
| FMNL2    | 5,575  | 0.48  | 5.52  | 11.5        | 0        |
| FMNL3    | 11,183 | 3.88  | 26.25 | 6.765463918 | 0        |
| FNBP1    | 5,863  | 19.68 | 47.13 | 2.394817073 | 0        |
| FOLR2    | 1,102  | 2.52  | 19.72 | 7.825396825 | 0        |
| FOS      | 2,084  | 37.88 | 92.28 | 2.436114044 | 0        |
| FOXM1    | 3,626  | 4.06  | 14.66 | 3.610837438 | 0        |

|              |        |        |        |             |          |
|--------------|--------|--------|--------|-------------|----------|
| FOXP4        | 6,413  | 1.93   | 5.08   | 2.632124352 | 0        |
| FOXRED1      | 1,951  | 4.16   | 12.87  | 3.09375     | 0        |
| FOXRED2      | 3,932  | 0.68   | 8.89   | 13.07352941 | 0        |
| FRAG1        | 1,952  | 6.19   | 13.81  | 2.231017771 | 3.00E-15 |
| FRG2         | 2,084  | 0.19   | 2.87   | 15.10526316 | 9.00E-15 |
| FRMD4A       | 6,815  | 0.18   | 2.37   | 13.16666667 | 0        |
| FRS3         | 2,166  | 1.19   | 3.89   | 3.268907563 | 4.85E-09 |
| FSCN1        | 5,554  | 7.78   | 44.15  | 5.674807198 | 0        |
| FSTL4        | 5,382  | 0.55   | 2.38   | 4.327272727 | 0        |
| FTH1         | 2,432  | 85.51  | 185.74 | 2.172143609 | 0        |
| FTL          | 0.871  | 262.96 | 773.59 | 2.941854274 | 0        |
| FTLL1        | 0.978  | 14.57  | 62.45  | 4.28620453  | 0        |
| FTO          | 4,294  | 2.62   | 10.46  | 3.992366412 | 0        |
| FTSJ1        | 2,211  | 4.92   | 11.85  | 2.408536585 | 0        |
| FTSJ2        | 3,202  | 2.91   | 10.55  | 3.625429553 | 0        |
| FTSJ3        | 2,984  | 7.19   | 20.95  | 2.913769124 | 0        |
| FUCA1        | 2,031  | 7.64   | 47.82  | 6.259162304 | 0        |
| FUK          | 3,907  | 1.32   | 3.47   | 2.628787879 | 1.28E-10 |
| FUNDC2       | 2,964  | 6.78   | 15.52  | 2.289085546 | 0        |
| FUS          | 6,656  | 54.53  | 142.49 | 2.613057033 | 0        |
| FUT7         | 2,584  | 1.84   | 18.75  | 10.19021739 | 0        |
| FUZ          | 1,621  | 3.24   | 8.68   | 2.679012346 | 2.56E-11 |
| FXN          | 3,793  | 1.49   | 4.15   | 2.785234899 | 5.64E-13 |
| FXR2         | 2,844  | 2.12   | 11.02  | 5.198113208 | 0        |
| FXYD6        | 1,675  | 2.66   | 7.55   | 2.838345865 | 4.59E-11 |
| FYN          | 5.31   | 26.90  | 114.19 | 4.244981413 | 0        |
| FZD2         | 1,983  | 0.15   | 4.59   | 30.6        | 0        |
| G3BP1        | 4,259  | 10.46  | 29.54  | 2.824091778 | 0        |
| G6PC3        | 1,558  | 3.81   | 42.61  | 11.18372703 | 0        |
| G6PD         | 2,631  | 12.11  | 39.76  | 3.283236994 | 0        |
| GABARAPL2    | 1,002  | 18.46  | 42.88  | 2.322860238 | 0        |
| GADD45GIP1   | 0.743  | 28.50  | 90.93  | 3.190526316 | 0        |
| GALE         | 1,724  | 0.86   | 4.84   | 5.627906977 | 9.90E-14 |
| GALK1        | 1,361  | 3.85   | 17.02  | 4.420779221 | 0        |
| GALNAC4S-6ST | 11,592 | 38.45  | 120.95 | 3.145643693 | 0        |
| GALNS        | 2,373  | 1.71   | 7.32   | 4.280701754 | 0        |
| GALNT1       | 3,771  | 8.24   | 23.21  | 2.816747573 | 0        |

|         |       |        |         |             |          |
|---------|-------|--------|---------|-------------|----------|
| GALNT10 | 5,657 | 0.98   | 3.13    | 3.193877551 | 0        |
| GALNT11 | 5,146 | 0.46   | 1.85    | 4.02173913  | 1.26E-12 |
| GALNT14 | 2,712 | 9.63   | 27.15   | 2.819314642 | 0        |
| GALT    | 1,335 | 6.08   | 12.18   | 2.003289474 | 5.61E-08 |
| GAMT    | 1,482 | 6.61   | 25.75   | 3.895612708 | 0        |
| GANAB   | 4.91  | 29.46  | 103.72  | 3.520706042 | 0        |
| GAPDH   | 1.31  | 585.01 | 1284.12 | 2.195039401 | 0        |
| GART    | 4,274 | 1.41   | 13.93   | 9.879432624 | 0        |
| GAS2L1  | 4,684 | 0.86   | 3.90    | 4.534883721 | 0        |
| GAS6    | 3,179 | 14.84  | 55.07   | 3.710916442 | 0        |
| GBA     | 2,888 | 3.05   | 13.65   | 4.475409836 | 0        |
| GBA2    | 3,611 | 3.95   | 10.52   | 2.663291139 | 0        |
| GBAP    | 4,648 | 0.77   | 2.28    | 2.961038961 | 5.86E-10 |
| GBGT1   | 1,949 | 2.69   | 12.41   | 4.6133829   | 0        |
| GBL     | 1.64  | 6.75   | 24.97   | 3.699259259 | 0        |
| GBP5    | 2,792 | 11.48  | 28.70   | 2.5         | 0        |
| GCAT    | 1,459 | 0.41   | 5.89    | 14.36585366 | 0        |
| GCDH    | 2,092 | 3.69   | 11.35   | 3.075880759 | 0        |
| GCET2   | 3,721 | 3.99   | 13.04   | 3.268170426 | 0        |
| GCHFR   | 0.713 | 4.30   | 12.53   | 2.913953488 | 2.26E-08 |
| GCLM    | 3,074 | 0.93   | 3.23    | 3.47311828  | 2.62E-11 |
| GCNT1   | 5,518 | 0.52   | 3.60    | 6.923076923 | 0        |
| GDF11   | 1,962 | 6.91   | 18.99   | 2.748191027 | 0        |
| GDPD5   | 3,441 | 0.86   | 2.69    | 3.127906977 | 1.69E-09 |
| GEMIN4  | 3,446 | 1.40   | 6.55    | 4.678571429 | 0        |
| GEMIN5  | 4,527 | 0.59   | 6.28    | 10.6440678  | 0        |
| GEMIN7  | 1,848 | 10.76  | 21.54   | 2.001858736 | 0        |
| GGCX    | 3,159 | 1.28   | 5.68    | 4.4375      | 0        |
| GGPS1   | 3,734 | 1.62   | 4.87    | 3.00617284  | 0        |
| GGTLA1  | 2,405 | 7.40   | 30.20   | 4.081081081 | 0        |
| GHDC    | 2.65  | 2.50   | 13.83   | 5.532       | 0        |
| GIMAP4  | 3.93  | 11.66  | 32.99   | 2.829331046 | 0        |
| GIMAP6  | 8,127 | 7.02   | 19.09   | 2.719373219 | 0        |
| GIMAP7  | 2,458 | 3.22   | 7.47    | 2.319875776 | 1.35E-11 |
| GIMAP8  | 7,886 | 0.59   | 3.11    | 5.271186441 | 0        |
| GINS2   | 1,172 | 1.77   | 11.14   | 6.293785311 | 0        |
| GIPC1   | 2,115 | 6.45   | 40.82   | 6.328682171 | 0        |

|         |       |       |        |             |          |
|---------|-------|-------|--------|-------------|----------|
| GIPC3   | 1,212 | 2.53  | 24.38  | 9.636363636 | 0        |
| GIT1    | 3,726 | 11.26 | 30.43  | 2.702486679 | 0        |
| GJC1    | 2,094 | 0.85  | 4.76   | 5.6         | 1.00E-15 |
| GLB1    | 2,392 | 5.13  | 16.55  | 3.226120858 | 0        |
| GLDC    | 3,764 | 0.68  | 4.81   | 7.073529412 | 0        |
| GLDCP   | 3,766 | 0.24  | 2.37   | 9.875       | 0        |
| GLI4    | 1,343 | 5.01  | 12.23  | 2.441117764 | 2.04E-11 |
| GLIPR1  | 1,061 | 2.99  | 11.04  | 3.692307692 | 1.23E-13 |
| GLOXD1  | 1,803 | 1.04  | 3.83   | 3.682692308 | 1.73E-08 |
| GLRX    | 1,786 | 16.23 | 33.41  | 2.05853358  | 0        |
| GLT25D1 | 3,593 | 13.16 | 44.24  | 3.361702128 | 0        |
| GLT8D1  | 2,427 | 5.14  | 16.62  | 3.233463035 | 0        |
| GM2A    | 2,511 | 3.55  | 19.49  | 5.490140845 | 0        |
| GMPPA   | 1,885 | 3.41  | 12.87  | 3.774193548 | 0        |
| GMPR2   | 2,824 | 10.54 | 27.44  | 2.60341556  | 0        |
| GNA15   | 2,673 | 36.38 | 114.01 | 3.133864761 | 0        |
| GNAI2   | 2.2   | 80.67 | 187.08 | 2.319077724 | 0        |
| GNB1L   | 1,515 | 1.24  | 5.45   | 4.39516129  | 1.90E-11 |
| GNG2    | 3,419 | 9.72  | 24.76  | 2.547325103 | 0        |
| GNG5    | 0.701 | 19.06 | 44.82  | 2.351521511 | 0        |
| GNG5ps  | 0.427 | 6.02  | 21.70  | 3.604651163 | 6.91E-11 |
| GNL2    | 2,308 | 6.82  | 17.95  | 2.631964809 | 0        |
| GNL3L   | 6,826 | 3.77  | 9.43   | 2.50132626  | 0        |
| GNPAT   | 2,439 | 4.10  | 10.81  | 2.636585366 | 0        |
| GNPDA1  | 2,267 | 0.48  | 10.59  | 22.0625     | 0        |
| GNPNAT1 | 3,925 | 0.45  | 3.95   | 8.777777778 | 0        |
| GNRHR2  | 6,257 | 1.25  | 4.46   | 3.568       | 0        |
| GNS     | 5,114 | 2.38  | 8.69   | 3.651260504 | 0        |
| GOLGA2  | 4.26  | 3.48  | 7.62   | 2.189655172 | 0        |
| GOLGA3  | 9,252 | 4.07  | 8.83   | 2.16953317  | 0        |
| GOLGA5  | 2,891 | 1.71  | 6.26   | 3.660818713 | 0        |
| GOLGA7  | 2,105 | 7.43  | 21.17  | 2.849259758 | 0        |
| GOLPH3L | 3,127 | 1.04  | 7.38   | 7.096153846 | 0        |
| GORASP2 | 2,499 | 18.53 | 42.57  | 2.29735564  | 0        |
| GOSR2   | 6,049 | 1.72  | 6.85   | 3.98255814  | 0        |
| GOT1    | 1,942 | 2.14  | 11.80  | 5.514018692 | 0        |
| GPAA1   | 2,067 | 13.74 | 43.60  | 3.173216885 | 0        |

|         |        |       |        |             |          |
|---------|--------|-------|--------|-------------|----------|
| GPATCH4 | 2.1    | 2.17  | 21.26  | 9.797235023 | 0        |
| GPD1L   | 3,915  | 1.21  | 3.47   | 2.867768595 | 3.66E-12 |
| GPHN    | 4,302  | 0.94  | 2.61   | 2.776595745 | 5.57E-10 |
| GPI     | 2,321  | 26.56 | 77.50  | 2.917921687 | 0        |
| GPKOW   | 1,652  | 5.27  | 12.90  | 2.447817837 | 2.00E-14 |
| GPM6B   | 4,093  | 0.27  | 2.92   | 10.81481481 | 0        |
| GPR108  | 2,405  | 5.39  | 15.09  | 2.799628942 | 0        |
| GPR124  | 5,649  | 1.21  | 10.66  | 8.809917355 | 0        |
| GPR137  | 1,688  | 4.28  | 13.22  | 3.088785047 | 0        |
| GPR171  | 1,786  | 0.55  | 4.48   | 8.145454545 | 0        |
| GPR172A | 1,937  | 1.17  | 18.79  | 16.05982906 | 0        |
| GPR175  | 1,861  | 3.30  | 16.75  | 5.075757576 | 0        |
| GPR56   | 5.98   | 8.95  | 31.03  | 3.467039106 | 0        |
| GPR68   | 2,814  | 0.45  | 4.07   | 9.044444444 | 0        |
| GPR92   | 2,845  | 2.47  | 9.68   | 3.91902834  | 0        |
| GPRIN1  | 4,208  | 0.66  | 3.76   | 5.696969697 | 0        |
| GPS1    | 2,738  | 14.96 | 31.32  | 2.093582888 | 0        |
| GPSM2   | 2,788  | 1.17  | 3.30   | 2.820512821 | 2.62E-08 |
| GPSN2   | 1,163  | 21.27 | 89.67  | 4.215796897 | 0        |
| GPX1    | 2,007  | 96.22 | 242.30 | 2.518187487 | 0        |
| GPX4    | 1,528  | 70.96 | 172.94 | 2.437147689 | 0        |
| GPX7    | 1,227  | 9.43  | 33.43  | 3.545068929 | 0        |
| GRAMD1A | 2.64   | 36.12 | 135.74 | 3.758028793 | 0        |
| GRB2    | 3,468  | 21.14 | 47.51  | 2.247398297 | 0        |
| GRHPR   | 1,235  | 8.01  | 19.58  | 2.444444444 | 0        |
| GRID2IP | 57,639 | 0.20  | 0.55   | 2.75        | 0        |
| GRIN2C  | 4,268  | 1.00  | 2.52   | 2.52        | 3.16E-08 |
| GRINA   | 2.11   | 18.19 | 49.66  | 2.730071468 | 0        |
| GRK6    | 4,115  | 7.36  | 21.49  | 2.919836957 | 0        |
| GRLF1   | 8,244  | 2.74  | 7.74   | 2.824817518 | 0        |
| GRN     | 2,551  | 27.34 | 104.51 | 3.822604243 | 0        |
| GRPEL1  | 1,504  | 3.35  | 13.33  | 3.979104478 | 0        |
| GRSF1   | 2,839  | 8.29  | 16.89  | 2.037394451 | 0        |
| GRWD1   | 2,414  | 3.44  | 20.13  | 5.851744186 | 0        |
| GSDMDC1 | 2,027  | 25.23 | 66.44  | 2.633372969 | 0        |
| GSK3A   | 2,179  | 7.67  | 49.52  | 6.456323338 | 0        |
| GSR     | 2,262  | 6.47  | 17.31  | 2.675425039 | 0        |

|             |        |        |        |             |          |
|-------------|--------|--------|--------|-------------|----------|
| GSS         | 1.9    | 9.47   | 26.73  | 2.822597677 | 0        |
| GSTK1       | 2      | 20.34  | 40.73  | 2.00245821  | 0        |
| GSTM1       | 1,161  | 9.63   | 23.00  | 2.388369678 | 0        |
| GSTO1       | 0.785  | 22.31  | 53.87  | 2.414612281 | 0        |
| GSTO3P1     | 0.79   | 2.63   | 9.70   | 3.688212928 | 2.84E-09 |
| GSTP1       | 0.942  | 104.71 | 419.69 | 4.008117658 | 0        |
| GTF2A1      | 1,922  | 0.83   | 3.72   | 4.481927711 | 2.93E-10 |
| GTF2A2      | 0.735  | 14.54  | 31.17  | 2.143741403 | 3.17E-12 |
| GTF2E2      | 1.53   | 5.17   | 13.38  | 2.588007737 | 5.00E-15 |
| GTF2H1      | 3,175  | 1.34   | 8.51   | 6.350746269 | 0        |
| GTF2H5      | 0.449  | 2.20   | 24.57  | 11.16818182 | 0        |
| GTPBP5      | 3,085  | 2.72   | 6.22   | 2.286764706 | 7.42E-12 |
| GTSE1       | 4,478  | 0.53   | 6.49   | 12.24528302 | 0        |
| GUCY1A3     | 2,992  | 1.85   | 4.50   | 2.432432432 | 1.43E-09 |
| GUSBL2      | 2,624  | 0.90   | 3.24   | 3.6         | 2.88E-10 |
| GVIN1       | 8.82   | 0.12   | 1.57   | 13.08333333 | 0        |
| GYS1        | 3,557  | 4.01   | 20.32  | 5.067331671 | 0        |
| GZMA        | 0.878  | 3.95   | 37.99  | 9.617721519 | 0        |
| H2AFV       | 4,406  | 5.59   | 14.88  | 2.661896243 | 0        |
| H2AFX       | 1,594  | 5.47   | 53.96  | 9.864716636 | 0        |
| H2AFY       | 17,759 | 61.12  | 260.08 | 4.255235602 | 0        |
| H6PD        | 9,117  | 2.29   | 6.60   | 2.88209607  | 0        |
| HACE1       | 4.54   | 0.59   | 2.01   | 3.406779661 | 3.65E-10 |
| HADH        | 1,912  | 6.99   | 28.06  | 4.014306152 | 0        |
| HAGH        | 2,266  | 2.19   | 9.36   | 4.273972603 | 0        |
| HAT1        | 1,828  | 5.25   | 12.99  | 2.474285714 | 0        |
| HAX1        | 1,294  | 13.69  | 46.29  | 3.381300219 | 0        |
| HBD         | 0.774  | 4.86   | 41.25  | 8.487654321 | 0        |
| HBG1        | 0.584  | 19.14  | 75.58  | 3.948798328 | 0        |
| HBG2        | 0.583  | 37.34  | 156.04 | 4.178896626 | 0        |
| HBM         | 0.51   | 4.46   | 30.39  | 6.813901345 | 0        |
| HCFC1       | 7,711  | 9.68   | 22.88  | 2.363636364 | 0        |
| HCFC1R1     | 1,133  | 9.43   | 24.31  | 2.577942736 | 0        |
| hCG_1641229 | 1,748  | 13.13  | 66.21  | 5.042650419 | 0        |
| hCG_1773937 | 0.644  | 20.43  | 54.66  | 2.675477239 | 0        |
| hCG_1776980 | 1,212  | 2.04   | 13.27  | 6.504901961 | 0        |
| hCG_1983058 | 0.779  | 51.18  | 126.19 | 2.465611567 | 0        |

|             |        |       |        |             |          |
|-------------|--------|-------|--------|-------------|----------|
| hCG_2028557 | 1.93   | 3.80  | 10.44  | 2.747368421 | 0        |
| hCG_32481   | 3,633  | 2.21  | 9.44   | 4.271493213 | 0        |
| HCK         | 2,089  | 0.90  | 4.96   | 5.511111111 | 0        |
| HCLS1       | 1,957  | 30.58 | 112.82 | 3.689339438 | 0        |
| HCST        | 0.545  | 13.43 | 34.00  | 2.53164557  | 2.72E-13 |
| HDAC1       | 2,091  | 12.21 | 80.09  | 6.559377559 | 0        |
| HDAC2       | 1,964  | 11.79 | 34.22  | 2.902459712 | 0        |
| HDAC3       | 1,934  | 7.87  | 23.00  | 2.92249047  | 0        |
| HDAC8       | 1,714  | 2.08  | 5.80   | 2.788461538 | 8.57E-09 |
| HDAC9       | 15,461 | 0.35  | 0.80   | 2.285714286 | 4.84E-08 |
| HDDC2       | 1.36   | 4.36  | 23.34  | 5.353211009 | 0        |
| HDDC3       | 1,047  | 2.74  | 21.40  | 7.810218978 | 0        |
| HDGF        | 2,377  | 39.09 | 139.17 | 3.560245587 | 0        |
| HDGF2       | 2,422  | 6.83  | 30.46  | 4.459736457 | 0        |
| HDHD1A      | 2,098  | 0.85  | 3.41   | 4.011764706 | 2.98E-09 |
| HDHD2       | 2,185  | 2.18  | 18.47  | 8.472477064 | 0        |
| HDHD3       | 1,721  | 2.87  | 11.60  | 4.041811847 | 0        |
| HDLBP       | 5,494  | 16.51 | 46.69  | 2.827983041 | 0        |
| HEATR2      | 6,494  | 1.63  | 5.96   | 3.656441718 | 0        |
| HEATR3      | 2,625  | 0.72  | 3.65   | 5.069444444 | 2.40E-14 |
| HEBP1       | 1,187  | 7.08  | 18.38  | 2.596045198 | 0        |
| HECTD3      | 3,407  | 6.71  | 16.25  | 2.421758569 | 0        |
| HEMGN       | 2,296  | 0.26  | 3.45   | 13.26923077 | 0        |
| HEMK1       | 5,862  | 2.33  | 5.76   | 2.472103004 | 0        |
| HERC4       | 5,878  | 1.18  | 4.41   | 3.737288136 | 0        |
| HERC6       | 4,954  | 1.46  | 3.18   | 2.178082192 | 4.92E-09 |
| HEXDC       | 1,903  | 7.07  | 17.06  | 2.41301273  | 0        |
| HEXIM2      | 1.33   | 1.41  | 6.27   | 4.446808511 | 1.18E-11 |
| HHAT        | 3,594  | 1.02  | 2.86   | 2.803921569 | 3.61E-09 |
| HHLA3       | 1,863  | 0.85  | 5.02   | 5.905882353 | 1.00E-15 |
| HIBADH      | 3,956  | 0.65  | 5.36   | 8.246153846 | 0        |
| HIBCH       | 2,326  | 0.47  | 4.31   | 9.170212766 | 0        |
| HIP1        | 14,675 | 1.07  | 2.24   | 2.093457944 | 0        |
| HIRIP3      | 2,344  | 3.38  | 17.32  | 5.124260355 | 0        |
| HISPPD2A    | 7,708  | 1.72  | 4.05   | 2.354651163 | 0        |
| HIST1H2AC   | 0.794  | 22.43 | 104.76 | 4.670530539 | 0        |
| HIST1H2BD   | 0.907  | 6.65  | 57.11  | 8.587969925 | 0        |

|           |        |        |         |             |          |
|-----------|--------|--------|---------|-------------|----------|
| HIST1H2BK | 0.82   | 114.14 | 259.49  | 2.273436131 | 0        |
| HIVEP3    | 8,544  | 1.44   | 3.70    | 2.569444444 | 0        |
| HK1       | 4,528  | 3.54   | 10.10   | 2.853107345 | 0        |
| HLA-A     | 3,128  | 130.57 | 286.63  | 2.195220954 | 0        |
| HLA-DOA   | 10,455 | 2.28   | 7.22    | 3.166666667 | 0        |
| HLA-DOB   | 2,644  | 7.30   | 21.57   | 2.954794521 | 0        |
| HLA-DPA1  | 3,471  | 3.33   | 8.64    | 2.594594595 | 0        |
| HLA-DQA1  | 5.26   | 24.30  | 74.89   | 3.081893004 | 0        |
| HLA-DRA   | 3,756  | 20.70  | 46.65   | 2.253623188 | 0        |
| HLA-DRB5  | 1,385  | 322.60 | 1028.17 | 3.187135772 | 0        |
| HM13      | 4,009  | 9.13   | 31.85   | 3.488499452 | 0        |
| HMBS      | 1,655  | 0.77   | 10.18   | 13.22077922 | 0        |
| HMG20A    | 3,885  | 3.85   | 8.57    | 2.225974026 | 0        |
| HMG20B    | 1,796  | 23.46  | 50.63   | 2.158141517 | 0        |
| HMGA1     | 2,618  | 38.24  | 125.91  | 3.292625523 | 0        |
| HMGA1L2   | 1,397  | 2.83   | 8.87    | 3.134275618 | 3.29E-12 |
| HMGA1L3   | 1,814  | 2.73   | 8.83    | 3.234432234 | 1.00E-15 |
| HMGCL     | 1,608  | 2.77   | 12.68   | 4.577617329 | 0        |
| HMGCR     | 4,475  | 2.61   | 5.86    | 2.245210728 | 5.00E-15 |
| HMGN1     | 1,918  | 25.12  | 56.00   | 2.229299363 | 0        |
| HMGN2     | 1.52   | 27.54  | 65.39   | 2.374364561 | 0        |
| HMGN4     | 1,969  | 7.99   | 21.52   | 2.693366708 | 0        |
| HMMR      | 2,988  | 0.13   | 4.60    | 35.38461538 | 0        |
| HMOX2     | 1,626  | 2.61   | 19.74   | 7.563218391 | 0        |
| HN1       | 3,463  | 2.03   | 15.33   | 7.551724138 | 0        |
| HN1L      | 3,683  | 0.89   | 12.92   | 14.51685393 | 0        |
| HNRPA2B1  | 8,391  | 62.95  | 212.70  | 3.378872121 | 0        |
| HNRPAB    | 1,816  | 11.98  | 75.35   | 6.289649416 | 0        |
| HNRPC     | 3,229  | 47.03  | 171.00  | 3.635977036 | 0        |
| HNRPCL1   | 1,108  | 3.22   | 12.32   | 3.826086957 | 0        |
| HNRPCP    | 1,613  | 1.47   | 4.96    | 3.37414966  | 5.55E-09 |
| HNRPF     | 2,591  | 43.46  | 115.77  | 2.663828808 | 0        |
| HNRPL     | 5,205  | 57.37  | 120.93  | 2.107896113 | 0        |
| HNRPM     | 5,347  | 44.92  | 99.98   | 2.225734639 | 0        |
| HNRPU     | 8,227  | 30.86  | 77.63   | 2.515554115 | 0        |
| HNRPUL2   | 5,222  | 21.46  | 61.58   | 2.869524697 | 0        |
| HNRPUP    | 0.651  | 47.42  | 106.49  | 2.24567693  | 0        |



|           |       |        |        |             |          |
|-----------|-------|--------|--------|-------------|----------|
| HOMER3    | 1,517 | 0.39   | 8.05   | 20.64102564 | 0        |
| HOMEZ     | 3,665 | 0.19   | 4.21   | 22.15789474 | 0        |
| HOOK2     | 2,513 | 1.69   | 5.13   | 3.035502959 | 1.84E-12 |
| HP        | 1,433 | 2.21   | 7.41   | 3.352941176 | 2.09E-11 |
| HP1BP3    | 2,092 | 10.92  | 47.70  | 4.368131868 | 0        |
| HPCAL1    | 2,834 | 21.40  | 58.16  | 2.717757009 | 0        |
| HPS3      | 4,451 | 0.43   | 2.14   | 4.976744186 | 2.40E-14 |
| HPS5      | 5,115 | 1.30   | 2.72   | 2.092307692 | 1.08E-07 |
| HRAS      | 1,251 | 3.16   | 9.56   | 3.025316456 | 2.42E-11 |
| HS1BP3    | 2,403 | 1.52   | 4.14   | 2.723684211 | 8.57E-09 |
| HS2ST1    | 6,714 | 0.87   | 3.20   | 3.67816092  | 0        |
| HS6ST1    | 2,055 | 2.32   | 5.99   | 2.581896552 | 1.30E-09 |
| HSBP1     | 1,891 | 5.23   | 14.88  | 2.845124283 | 0        |
| HSD17B1   | 2.23  | 1.47   | 6.00   | 4.081632653 | 0        |
| HSD17B10  | 1,045 | 18.09  | 47.40  | 2.620232172 | 0        |
| HSD17B12  | 2,383 | 4.07   | 13.29  | 3.265356265 | 0        |
| HSD17B4   | 2,594 | 1.79   | 17.96  | 10.03351955 | 0        |
| HSDL2     | 3.21  | 1.48   | 9.50   | 6.418918919 | 0        |
| HSH2D     | 2,367 | 7.61   | 23.70  | 3.114323259 | 0        |
| HSP90AA1  | 4,418 | 63.44  | 186.89 | 2.945933165 | 0        |
| HSP90AA2  | 3,218 | 12.33  | 33.74  | 2.736415247 | 0        |
| HSP90AA4P | 2,287 | 1.51   | 4.53   | 3           | 3.15E-10 |
| HSP90AB1  | 2,538 | 145.13 | 501.34 | 3.454420175 | 0        |
| HSP90AB2P | 1,277 | 7.59   | 21.37  | 2.815546772 | 0        |
| HSP90AB3P | 2,546 | 16.21  | 44.83  | 2.765576804 | 0        |
| HSP90B1   | 2.78  | 33.81  | 178.38 | 5.27595386  | 0        |
| HSP90B2P  | 2,083 | 5.46   | 24.11  | 4.415750916 | 0        |
| HSP90B3P  | 10.13 | 0.23   | 1.33   | 5.782608696 | 0        |
| HSPA12B   | 3,109 | 6.59   | 55.92  | 8.485584219 | 0        |
| HSPA2     | 2,464 | 0.60   | 5.06   | 8.433333333 | 0        |
| HSPA5     | 3,908 | 46.81  | 138.21 | 2.952574236 | 0        |
| HSPA8     | 2.42  | 90.52  | 396.75 | 4.38300928  | 0        |
| HSPB1     | 1,694 | 80.01  | 358.58 | 4.481689789 | 0        |
| HSPBP1    | 1,769 | 4.70   | 16.38  | 3.485106383 | 0        |
| HSPC152   | 0.583 | 51.93  | 222.37 | 4.282110533 | 0        |
| HSPC268   | 2,024 | 2.54   | 6.87   | 2.704724409 | 2.92E-11 |
| HSPD1     | 2,436 | 13.77  | 56.99  | 4.138707335 | 0        |

|         |        |        |        |             |          |
|---------|--------|--------|--------|-------------|----------|
| HSPE1   | 0.538  | 5.70   | 35.23  | 6.180701754 | 0        |
| HSPG2   | 14,288 | 1.56   | 3.31   | 2.121794872 | 0        |
| HSPH1   | 3,668  | 3.83   | 17.43  | 4.550913838 | 0        |
| HTATIP2 | 1,418  | 1.74   | 8.91   | 5.120689655 | 0        |
| HTATSF1 | 2,759  | 7.24   | 17.00  | 2.348066298 | 0        |
| HTRA2   | 2.55   | 9.63   | 21.14  | 2.195223261 | 0        |
| HTRA3   | 2,537  | 8.69   | 38.25  | 4.401611047 | 0        |
| HTRA4   | 1,764  | 1.63   | 6.28   | 3.852760736 | 2.04E-13 |
| HYAL2   | 1.95   | 0.30   | 8.21   | 27.36666667 | 0        |
| HYLS1   | 1.81   | 0.54   | 4.38   | 8.111111111 | 0        |
| HYOU1   | 4,556  | 3.48   | 36.20  | 10.40229885 | 0        |
| HYPK    | 1,349  | 12.03  | 36.78  | 3.057356608 | 0        |
| IARS2   | 3,549  | 6.13   | 14.91  | 2.432300163 | 0        |
| IBRDC3  | 1,987  | 7.02   | 19.84  | 2.826210826 | 0        |
| ICAM1   | 2,984  | 2.98   | 6.44   | 2.161073826 | 8.37E-11 |
| ICAM4   | 3,023  | 0.72   | 4.98   | 6.916666667 | 0        |
| ICK     | 6,403  | 0.88   | 2.21   | 2.511363636 | 2.73E-10 |
| ICMT    | 4,815  | 0.64   | 12.32  | 19.25       | 0        |
| ICT1    | 0.879  | 3.16   | 10.73  | 3.39556962  | 2.26E-10 |
| IDH1    | 2,329  | 2.13   | 5.82   | 2.732394366 | 3.73E-11 |
| IDH3A   | 2,665  | 1.78   | 10.62  | 5.966292135 | 0        |
| IDH3G   | 1,981  | 18.33  | 38.48  | 2.09929078  | 0        |
| IER5    | 2,337  | 18.42  | 61.38  | 3.332247557 | 0        |
| IFI16   | 3.85   | 37.70  | 100.06 | 2.654111406 | 0        |
| IFI30   | 1,032  | 15.82  | 164.48 | 10.39696587 | 0        |
| IFI35   | 1,164  | 6.37   | 37.05  | 5.816326531 | 0        |
| IFI6    | 1,012  | 5.18   | 22.05  | 4.256756757 | 0        |
| IFITM1  | 0.855  | 155.41 | 394.38 | 2.537674538 | 0        |
| IFITM2  | 0.904  | 141.95 | 553.50 | 3.899260303 | 0        |
| IFITM3  | 0.808  | 190.65 | 676.60 | 3.548911618 | 0        |
| IFNAR1  | 6,095  | 1.53   | 5.50   | 3.594771242 | 0        |
| IFRD2   | 2,045  | 3.48   | 22.32  | 6.413793103 | 0        |
| IGFBP4  | 2,236  | 28.18  | 126.28 | 4.481192335 | 0        |
| IGFBP7  | 1.11   | 15.07  | 105.02 | 6.96881221  | 0        |
| IGHA1   | 1,061  | 24.25  | 97.89  | 4.036701031 | 0        |
| IGHA2   | 1,019  | 2.52   | 8.84   | 3.507936508 | 3.82E-10 |
| IGHG1   | 0.992  | 11.47  | 35.92  | 3.131647777 | 0        |

|        |       |        |         |             |          |
|--------|-------|--------|---------|-------------|----------|
| IGHG3  | 1,663 | 8.80   | 41.54   | 4.720454545 | 0        |
| IGHGP  | 3,089 | 1.47   | 6.35    | 4.319727891 | 0        |
| IGJ    | 1,056 | 118.05 | 1061.99 | 8.996103346 | 0        |
| IGKC   | 0.323 | 83.32  | 200.29  | 2.403864618 | 0        |
| IGLC1  | 0.318 | 9.95   | 29.40   | 2.954773869 | 6.20E-09 |
| IGLC2  | 0.318 | 11.82  | 65.17   | 5.513536379 | 0        |
| IGLL1  | 1,362 | 3.05   | 34.26   | 11.23278689 | 0        |
| IGSF8  | 2.28  | 2.39   | 12.56   | 5.255230126 | 0        |
| IK     | 1,784 | 28.62  | 65.54   | 2.290006988 | 0        |
| IKBKAP | 5,902 | 2.43   | 5.28    | 2.172839506 | 0        |
| IKBKB  | 3,916 | 5.40   | 13.01   | 2.409259259 | 0        |
| IKBKE  | 3,263 | 0.73   | 2.91    | 3.98630137  | 5.01E-12 |
| IKIP   | 4,796 | 0.86   | 5.02    | 5.837209302 | 0        |
| IKZF3  | 2,437 | 2.12   | 11.91   | 5.617924528 | 0        |
| IKZF4  | 4,396 | 1.08   | 4.00    | 3.703703704 | 0        |
| IL10RB | 1,935 | 4.96   | 12.84   | 2.588709677 | 0        |
| IL16   | 14.09 | 3.32   | 10.02   | 3.018072289 | 0        |
| IL17RE | 5,878 | 0.54   | 2.65    | 4.907407407 | 0        |
| IL18BP | 2,452 | 2.75   | 23.22   | 8.443636364 | 0        |
| IL1B   | 1,498 | 1.58   | 13.72   | 8.683544304 | 0        |
| IL21R  | 3,584 | 2.12   | 11.17   | 5.268867925 | 0        |
| IL27RA | 3,258 | 1.52   | 6.82    | 4.486842105 | 0        |
| IL28RA | 8,959 | 0.06   | 0.87    | 14.5        | 0        |
| IL2RA  | 2,306 | 1.63   | 22.54   | 13.82822086 | 0        |
| IL2RG  | 1,451 | 21.21  | 218.05  | 10.28052805 | 0        |
| IL4R   | 3,862 | 9.48   | 42.88   | 4.523206751 | 0        |
| IL6R   | 6,755 | 0.12   | 4.01    | 33.41666667 | 0        |
| ILK    | 2.14  | 9.80   | 35.55   | 3.62755102  | 0        |
| ILVBL  | 2,786 | 8.06   | 19.05   | 2.363523573 | 0        |
| IMMT   | 2,697 | 8.55   | 30.57   | 3.575438596 | 0        |
| IMP3   | 1.16  | 10.15  | 41.25   | 4.064039409 | 0        |
| IMPA2  | 1.5   | 0.60   | 3.88    | 6.466666667 | 1.26E-10 |
| IMPACT | 3,683 | 1.56   | 5.03    | 3.224358974 | 0        |
| IMPDH1 | 7,392 | 3.31   | 6.93    | 2.093655589 | 0        |
| IMPDH2 | 2,396 | 57.11  | 198.64  | 3.478199965 | 0        |
| INCENP | 3,521 | 1.43   | 10.98   | 7.678321678 | 0        |
| ING1   | 5,121 | 1.72   | 3.60    | 2.093023256 | 1.30E-09 |

|          |        |       |        |             |          |
|----------|--------|-------|--------|-------------|----------|
| ING2     | 1,116  | 0.98  | 7.33   | 7.479591837 | 1.00E-15 |
| ING4     | 1,699  | 4.13  | 21.52  | 5.210653753 | 0        |
| INPP4A   | 3,475  | 1.31  | 3.58   | 2.732824427 | 2.69E-10 |
| INPP4B   | 2,936  | 2.02  | 15.26  | 7.554455446 | 0        |
| INTS3    | 4,482  | 17.77 | 56.60  | 3.1851435   | 0        |
| INTS5    | 3,285  | 4.91  | 13.36  | 2.720977597 | 0        |
| INTS6    | 9,389  | 0.74  | 2.72   | 3.675675676 | 0        |
| INTS7    | 3,462  | 1.08  | 3.14   | 2.907407407 | 3.51E-10 |
| INTS8    | 3,373  | 3.23  | 9.97   | 3.086687307 | 0        |
| IPO11    | 4,866  | 3.90  | 8.67   | 2.223076923 | 0        |
| IPO13    | 3,593  | 1.81  | 10.41  | 5.751381215 | 0        |
| IPO7     | 3,754  | 5.56  | 21.68  | 3.899280576 | 0        |
| IPO8     | 5,156  | 2.19  | 6.96   | 3.178082192 | 0        |
| IPO9     | 3,126  | 3.42  | 10.75  | 3.143274854 | 0        |
| IQCG     | 2,244  | 0.61  | 4.38   | 7.180327869 | 0        |
| IQGAP2   | 5,767  | 2.04  | 6.08   | 2.980392157 | 0        |
| IQWD1    | 3,293  | 3.06  | 6.85   | 2.238562092 | 4.14E-13 |
| IRAK1    | 3,872  | 14.92 | 37.16  | 2.490616622 | 0        |
| IRF2     | 2,224  | 5.65  | 31.33  | 5.545132743 | 0        |
| IRF2BP1  | 2,511  | 2.68  | 16.60  | 6.194029851 | 0        |
| IRF2BP2  | 3.35   | 36.24 | 77.15  | 2.128863135 | 0        |
| IRF7     | 2.59   | 2.98  | 16.39  | 5.5         | 0        |
| IRF8     | 3,997  | 44.24 | 125.94 | 2.846745027 | 0        |
| IRX3     | 2,308  | 0.00  | 12.55  | 12.55       | 0        |
| ISCU     | 1,198  | 16.27 | 36.43  | 2.23909035  | 0        |
| ISG15    | 0.634  | 4.21  | 19.93  | 4.733966746 | 0        |
| ISG20L2  | 2,051  | 4.15  | 8.42   | 2.028915663 | 1.23E-08 |
| ISLR     | 2,385  | 0.20  | 17.27  | 86.35       | 0        |
| ISOC1    | 2,054  | 0.24  | 4.10   | 17.08333333 | 0        |
| ISOC2    | 1,122  | 1.94  | 21.24  | 10.94845361 | 0        |
| ITFG1    | 2,234  | 4.12  | 12.25  | 2.973300971 | 0        |
| ITFG2    | 2,155  | 5.37  | 14.19  | 2.642458101 | 0        |
| ITFG3    | 2,921  | 5.08  | 18.29  | 3.600393701 | 0        |
| ITGA11   | 6,334  | 0.12  | 1.44   | 12          | 0        |
| ITGA6    | 12,095 | 62.05 | 168.62 | 2.717485898 | 0        |
| ITGB1BP1 | 1,423  | 5.70  | 16.75  | 2.938596491 | 0        |
| ITGB2    | 2,868  | 26.39 | 84.32  | 3.195149678 | 0        |

|          |       |       |       |             |          |
|----------|-------|-------|-------|-------------|----------|
| ITGB4BP  | 2,074 | 17.51 | 46.95 | 2.681324957 | 0        |
| ITGB7    | 2,771 | 9.82  | 46.24 | 4.708757637 | 0        |
| ITM2C    | 2,073 | 5.20  | 67.82 | 13.04230769 | 0        |
| ITPA     | 1.14  | 9.38  | 23.28 | 2.481876333 | 0        |
| ITPKC    | 3,385 | 0.47  | 3.24  | 6.893617021 | 0        |
| ITSN1    | 7,951 | 0.50  | 1.81  | 3.62        | 1.00E-15 |
| IVD      | 2.49  | 6.32  | 12.77 | 2.02056962  | 1.40E-14 |
| JAG2     | 5,077 | 0.39  | 1.71  | 4.384615385 | 4.72E-12 |
| JAGN1    | 1,655 | 7.06  | 19.85 | 2.811614731 | 0        |
| JOSD2    | 0.769 | 2.32  | 10.30 | 4.439655172 | 2.92E-11 |
| JPH2     | 5,941 | 0.10  | 1.21  | 12.1        | 0        |
| JPH4     | 4,386 | 3.05  | 6.63  | 2.173770492 | 1.00E-15 |
| JRKL     | 2,914 | 0.44  | 2.63  | 5.977272727 | 3.37E-13 |
| JTV1     | 2,438 | 2.80  | 8.87  | 3.167857143 | 0        |
| KARS     | 1,997 | 33.68 | 68.37 | 2.029988124 | 0        |
| KATNB1   | 2,646 | 4.83  | 12.00 | 2.48447205  | 0        |
| KCNA5    | 2,865 | 9.19  | 38.52 | 4.191512514 | 0        |
| KCNAB2   | 3,171 | 9.42  | 19.71 | 2.092356688 | 0        |
| KCNK12   | 1,425 | 7.15  | 46.59 | 6.516083916 | 0        |
| KCNMB1   | 1,517 | 0.59  | 5.11  | 8.661016949 | 1.00E-15 |
| KCNN3    | 3,228 | 0.68  | 12.68 | 18.64705882 | 0        |
| KCNN4    | 2.24  | 2.04  | 11.43 | 5.602941176 | 0        |
| KCTD5    | 2.46  | 4.90  | 21.78 | 4.444897959 | 0        |
| KDELR1   | 1,557 | 28.21 | 73.79 | 2.6157391   | 0        |
| KDELR2   | 2,306 | 5.10  | 24.73 | 4.849019608 | 0        |
| KDELR3   | 2,127 | 0.19  | 4.63  | 24.36842105 | 0        |
| KEAP1    | 2,701 | 4.91  | 28.60 | 5.824847251 | 0        |
| KHDRBS3  | 1,957 | 6.77  | 67.11 | 9.912850812 | 0        |
| KHSRP    | 4,002 | 25.41 | 61.69 | 2.427784337 | 0        |
| KIAA0020 | 2,112 | 3.84  | 8.62  | 2.244791667 | 7.02E-11 |
| KIAA0090 | 4,238 | 3.22  | 10.32 | 3.204968944 | 0        |
| KIAA0100 | 7,431 | 11.26 | 35.04 | 3.111900533 | 0        |
| KIAA0101 | 2,586 | 1.08  | 3.85  | 3.564814815 | 1.70E-11 |
| KIAA0133 | 5,613 | 0.61  | 2.18  | 3.573770492 | 4.80E-14 |
| KIAA0146 | 3.22  | 2.18  | 7.04  | 3.229357798 | 0        |
| KIAA0152 | 6,349 | 4.28  | 20.55 | 4.801401869 | 0        |
| KIAA0179 | 5,087 | 2.65  | 11.01 | 4.154716981 | 0        |

|          |        |       |       |             |          |
|----------|--------|-------|-------|-------------|----------|
| KIAA0240 | 6,515  | 1.11  | 2.98  | 2.684684685 | 4.00E-15 |
| KIAA0274 | 3,061  | 0.68  | 3.42  | 5.029411765 | 1.00E-15 |
| KIAA0329 | 8,607  | 0.36  | 1.12  | 3.111111111 | 9.28E-10 |
| KIAA0350 | 7.02   | 2.51  | 6.42  | 2.557768924 | 0        |
| KIAA0367 | 11,705 | 0.76  | 2.35  | 3.092105263 | 0        |
| KIAA0406 | 3,914  | 1.52  | 7.51  | 4.940789474 | 0        |
| KIAA0494 | 5,765  | 5.70  | 12.64 | 2.21754386  | 0        |
| KIAA0513 | 7,361  | 0.43  | 3.60  | 8.372093023 | 0        |
| KIAA0562 | 5,846  | 1.46  | 4.67  | 3.198630137 | 0        |
| KIAA0586 | 4,966  | 0.76  | 3.17  | 4.171052632 | 0        |
| KIAA0664 | 5,224  | 5.48  | 11.91 | 2.173357664 | 0        |
| KIAA0746 | 4,383  | 1.54  | 85.68 | 55.63636364 | 0        |
| KIAA0748 | 3,673  | 2.35  | 5.41  | 2.30212766  | 3.40E-12 |
| KIAA0753 | 4,424  | 0.78  | 2.17  | 2.782051282 | 1.11E-08 |
| KIAA0774 | 5,193  | 0.78  | 5.63  | 7.217948718 | 0        |
| KIAA0828 | 10,669 | 2.02  | 4.15  | 2.054455446 | 0        |
| KIAA0859 | 4,834  | 1.35  | 10.55 | 7.814814815 | 0        |
| KIAA1191 | 2,786  | 4.48  | 14.06 | 3.138392857 | 0        |
| KIAA1274 | 4,568  | 10.98 | 25.96 | 2.364298725 | 0        |
| KIAA1303 | 6,856  | 3.93  | 17.11 | 4.353689567 | 0        |
| KIAA1305 | 7,857  | 0.57  | 4.59  | 8.052631579 | 0        |
| KIAA1430 | 2,895  | 1.06  | 4.69  | 4.424528302 | 0        |
| KIAA1467 | 4,711  | 0.36  | 3.42  | 9.5         | 0        |
| KIAA1539 | 3,028  | 2.12  | 4.90  | 2.311320755 | 1.06E-09 |
| KIAA1576 | 3,769  | 0.05  | 2.69  | 53.8        | 0        |
| KIAA1715 | 5,765  | 0.67  | 2.19  | 3.268656716 | 6.96E-13 |
| KIAA1787 | 5,357  | 2.42  | 6.86  | 2.834710744 | 0        |
| KIAA1794 | 4,569  | 3.16  | 9.23  | 2.920886076 | 0        |
| KIAA1799 | 2,106  | 0.84  | 4.08  | 4.857142857 | 3.61E-13 |
| KIAA1815 | 5,341  | 1.23  | 4.26  | 3.463414634 | 0        |
| KIAA1840 | 7,788  | 3.56  | 7.37  | 2.070224719 | 0        |
| KIAA1909 | 11,507 | 0.23  | 0.90  | 3.913043478 | 5.16E-13 |
| KIAA2013 | 2,341  | 4.61  | 24.48 | 5.310195228 | 0        |
| KIAA2026 | 4,673  | 1.84  | 3.82  | 2.076086957 | 2.12E-09 |
| KIF11    | 4.91   | 1.25  | 6.60  | 5.28        | 0        |
| KIF14    | 6,595  | 0.35  | 1.20  | 3.428571429 | 5.90E-09 |
| KIF15    | 4,758  | 0.42  | 3.17  | 7.547619048 | 0        |

|         |        |       |        |             |          |
|---------|--------|-------|--------|-------------|----------|
| KIF1C   | 4,188  | 2.79  | 10.66  | 3.82078853  | 0        |
| KIF20A  | 2,961  | 0.80  | 8.70   | 10.875      | 0        |
| KIF22   | 2,096  | 6.98  | 19.81  | 2.838108883 | 0        |
| KIF23   | 3,618  | 0.66  | 4.91   | 7.439393939 | 0        |
| KIF26A  | 7,237  | 0.75  | 3.06   | 4.08        | 0        |
| KIF2C   | 2,797  | 1.52  | 11.32  | 7.447368421 | 0        |
| KIF3A   | 6,257  | 0.11  | 0.95   | 8.636363636 | 2.70E-12 |
| KIF3C   | 5,379  | 2.03  | 11.18  | 5.507389163 | 0        |
| KIF4A   | 4,348  | 0.28  | 4.03   | 14.39285714 | 0        |
| KIFC1   | 4,708  | 1.11  | 11.40  | 10.27027027 | 0        |
| KIRREL  | 3,309  | 1.73  | 6.40   | 3.699421965 | 0        |
| KLC2    | 2,916  | 0.92  | 8.15   | 8.858695652 | 0        |
| KLF16   | 2,887  | 8.12  | 21.51  | 2.649014778 | 0        |
| KLHDC3  | 2,387  | 36.10 | 75.36  | 2.087534626 | 0        |
| KLHL22  | 2,568  | 2.20  | 11.02  | 5.009090909 | 0        |
| KLHL25  | 3,518  | 0.48  | 3.54   | 7.375       | 0        |
| KLHL8   | 4,576  | 0.91  | 3.13   | 3.43956044  | 2.00E-15 |
| KLK1    | 0.874  | 0.34  | 6.94   | 20.41176471 | 1.00E-15 |
| KPTN    | 1.64   | 1.81  | 14.54  | 8.033149171 | 0        |
| KRCC1   | 1,753  | 1.18  | 8.89   | 7.533898305 | 0        |
| KRT27   | 1,612  | 1.16  | 5.33   | 4.594827586 | 1.02E-12 |
| KRT8L2  | 1,689  | 0.36  | 3.49   | 9.694444444 | 5.56E-13 |
| KRTCAP2 | 0.547  | 39.07 | 159.23 | 4.075505503 | 0        |
| KTELC1  | 4,242  | 0.63  | 2.32   | 3.682539683 | 1.79E-11 |
| KTN1    | 4,793  | 9.47  | 20.68  | 2.18373812  | 0        |
| Kua     | 2,187  | 6.47  | 14.63  | 2.261205564 | 0        |
| Kua-UEV | 3,624  | 15.07 | 35.18  | 2.334439283 | 0        |
| L3MBTL2 | 4.43   | 1.92  | 10.29  | 5.359375    | 0        |
| LAGE3   | 0.943  | 4.41  | 22.60  | 5.124716553 | 0        |
| LAMA3   | 10.68  | 1.62  | 8.58   | 5.296296296 | 0        |
| LAMB1   | 11,659 | 0.44  | 1.89   | 4.295454545 | 0        |
| LAMC1   | 7,931  | 0.81  | 8.13   | 10.03703704 | 0        |
| LAP3    | 2.1    | 9.38  | 32.85  | 3.502132196 | 0        |
| LAPTM4B | 2,238  | 12.86 | 69.14  | 5.376360809 | 0        |
| LARP1   | 7,458  | 8.57  | 30.24  | 3.528588098 | 0        |
| LARP7   | 1,437  | 5.64  | 15.59  | 2.764184397 | 0        |
| LARS    | 4,244  | 4.08  | 20.13  | 4.933823529 | 0        |

|           |        |       |        |             |          |
|-----------|--------|-------|--------|-------------|----------|
| LARS2     | 4,203  | 2.28  | 6.99   | 3.065789474 | 0        |
| LASP1     | 3,845  | 15.52 | 87.61  | 5.644974227 | 0        |
| LASS2     | 2.43   | 20.35 | 67.39  | 3.311547912 | 0        |
| LAT2      | 4.62   | 10.00 | 73.12  | 7.312       | 0        |
| LBA1      | 10,815 | 3.42  | 7.35   | 2.149122807 | 0        |
| LCK       | 2,019  | 2.45  | 19.65  | 8.020408163 | 0        |
| LCP1      | 3,724  | 70.46 | 198.60 | 2.818620494 | 0        |
| LCP2      | 2,422  | 10.62 | 29.91  | 2.816384181 | 0        |
| LDB3      | 4,714  | 10.74 | 31.35  | 2.918994413 | 0        |
| LDHA      | 1,661  | 64.09 | 160.71 | 2.507567483 | 0        |
| LDHBP     | 1,004  | 18.33 | 40.44  | 2.206219313 | 0        |
| LDLRAD2   | 4,012  | 1.26  | 4.94   | 3.920634921 | 0        |
| LDLRAP1   | 2,845  | 8.31  | 28.72  | 3.456077016 | 0        |
| LEO1      | 2,148  | 1.80  | 9.85   | 5.472222222 | 0        |
| LETM1     | 3,908  | 2.31  | 9.57   | 4.142857143 | 0        |
| LGALS3BP  | 2,258  | 22.48 | 47.00  | 2.090747331 | 0        |
| LGALS9    | 1,696  | 20.36 | 61.09  | 3.000491159 | 0        |
| LGICZ1    | 1,289  | 4.45  | 19.92  | 4.476404494 | 0        |
| LGMN      | 2,138  | 16.01 | 58.98  | 3.683947533 | 0        |
| LGMN2P    | 1,979  | 3.20  | 10.73  | 3.353125    | 0        |
| LGR6      | 3.64   | 0.36  | 14.83  | 41.19444444 | 0        |
| LIG1      | 3,083  | 4.04  | 8.30   | 2.054455446 | 1.77E-12 |
| LIG3      | 3,856  | 2.69  | 7.16   | 2.661710037 | 0        |
| LIMK1     | 6,664  | 1.04  | 3.55   | 3.413461538 | 0        |
| LIMS1     | 1,531  | 0.65  | 3.79   | 5.830769231 | 7.06E-10 |
| LIMS2     | 2,111  | 0.10  | 9.14   | 91.4        | 0        |
| LIPA      | 2,624  | 6.52  | 27.03  | 4.145705521 | 0        |
| LIPE      | 3,806  | 0.23  | 1.57   | 6.826086957 | 2.05E-11 |
| LIX1L     | 1,401  | 4.31  | 14.56  | 3.378190255 | 0        |
| LLGL1     | 4,225  | 1.76  | 5.92   | 3.363636364 | 0        |
| LMAN2     | 1,581  | 28.60 | 100.04 | 3.497902098 | 0        |
| LMAN2L    | 2,398  | 1.16  | 9.59   | 8.267241379 | 0        |
| LMCD1     | 1,734  | 1.77  | 8.35   | 4.717514124 | 0        |
| LMNB1     | 2,882  | 6.49  | 40.51  | 6.241910632 | 0        |
| LMNB2     | 4,635  | 6.70  | 34.99  | 5.22238806  | 0        |
| LMO6      | 1.99   | 1.15  | 5.55   | 4.826086957 | 0        |
| LOC114984 | 0.878  | 0.79  | 19.38  | 24.53164557 | 0        |



|           |        |        |        |             |          |
|-----------|--------|--------|--------|-------------|----------|
| LOC116143 | 2,244  | 0.18   | 2.82   | 15.66666667 | 1.00E-15 |
| LOC116236 | 2,739  | 3.54   | 13.27  | 3.748587571 | 0        |
| LOC124446 | 1,437  | 44.40  | 93.55  | 2.106981982 | 0        |
| LOC124512 | 1,025  | 8.01   | 26.55  | 3.314606742 | 0        |
| LOC125208 | 0.911  | 214.49 | 568.11 | 2.648654949 | 0        |
| LOC127011 | 1,034  | 1.63   | 6.52   | 4           | 4.80E-09 |
| LOC133308 | 2,427  | 1.23   | 3.99   | 3.243902439 | 2.94E-10 |
| LOC134145 | 1,814  | 0.66   | 3.48   | 5.272727273 | 3.43E-10 |
| LOC134505 | 0.656  | 6.79   | 19.14  | 2.818851252 | 6.72E-11 |
| LOC134997 | 1,123  | 35.86  | 112.28 | 3.131065254 | 0        |
| LOC143244 | 4,043  | 0.37   | 1.73   | 4.675675676 | 1.67E-10 |
| LOC144097 | 1,961  | 2.83   | 23.16  | 8.183745583 | 0        |
| LOC144383 | 0.667  | 5.04   | 13.76  | 2.73015873  | 4.97E-08 |
| LOC145783 | 1,443  | 1.51   | 7.77   | 5.145695364 | 0        |
| LOC145989 | 1,478  | 2.94   | 13.62  | 4.632653061 | 0        |
| LOC146909 | 2,669  | 0.44   | 3.94   | 8.954545455 | 0        |
| LOC150223 | 2,356  | 5.41   | 11.40  | 2.107208872 | 1.01E-13 |
| LOC150383 | 2,841  | 0.31   | 2.73   | 8.806451613 | 0        |
| LOC152594 | 1.7    | 3.26   | 7.78   | 2.386503067 | 4.88E-09 |
| LOC152905 | 2,584  | 5.02   | 10.11  | 2.013944223 | 3.86E-12 |
| LOC158345 | 13,198 | 3.57   | 8.17   | 2.288515406 | 0        |
| LOC158714 | 2,855  | 2.60   | 7.64   | 2.938461538 | 0        |
| LOC162427 | 3,759  | 7.15   | 17.70  | 2.475524476 | 0        |
| LOC197322 | 3,555  | 2.04   | 9.83   | 4.818627451 | 0        |
| LOC202051 | 1,016  | 0.68   | 6.53   | 9.602941176 | 5.50E-14 |
| LOC205251 | 0.679  | 1.75   | 10.17  | 5.811428571 | 9.88E-12 |
| LOC219854 | 3,657  | 0.13   | 3.11   | 23.92307692 | 0        |
| LOC221838 | 3,488  | 42.92  | 148.24 | 3.453867661 | 0        |
| LOC222901 | 0.648  | 89.62  | 211.50 | 2.359964294 | 0        |
| LOC253482 | 0.699  | 225.47 | 642.43 | 2.849292589 | 0        |
| LOC260341 | 4,446  | 0.38   | 2.25   | 5.921052632 | 0        |
| LOC266783 | 2,846  | 3.99   | 12.40  | 3.107769424 | 0        |
| LOC283114 | 0.491  | 7.86   | 23.16  | 2.946564885 | 1.32E-10 |
| LOC283331 | 1,911  | 0.46   | 5.05   | 10.97826087 | 0        |
| LOC283537 | 3,157  | 2.01   | 4.38   | 2.179104478 | 3.70E-08 |
| LOC283755 | 4,222  | 0.52   | 1.81   | 3.480769231 | 9.80E-09 |
| LOC283871 | 4,346  | 1.27   | 3.95   | 3.11023622  | 0        |

|           |        |        |        |             |          |
|-----------|--------|--------|--------|-------------|----------|
| LOC284167 | 21,208 | 0.16   | 0.51   | 3.1875      | 4.20E-11 |
| LOC284184 | 0.766  | 5.55   | 36.07  | 6.499099099 | 0        |
| LOC284422 | 0.908  | 14.05  | 87.58  | 6.233451957 | 0        |
| LOC285053 | 1,264  | 4.15   | 13.77  | 3.318072289 | 0        |
| LOC285299 | 2,075  | 0.62   | 12.83  | 20.69354839 | 0        |
| LOC285550 | 9,011  | 1.53   | 3.34   | 2.183006536 | 0        |
| LOC286512 | 1,201  | 16.23  | 38.37  | 2.364140481 | 0        |
| LOC338098 | 0.374  | 1.59   | 17.79  | 11.18867925 | 6.00E-15 |
| LOC338099 | 0.775  | 4.09   | 13.81  | 3.376528117 | 1.37E-11 |
| LOC339123 | 2,042  | 10.46  | 24.03  | 2.297323136 | 0        |
| LOC339290 | 2,115  | 2.81   | 6.25   | 2.224199288 | 5.05E-08 |
| LOC339344 | 1,887  | 1.26   | 5.49   | 4.357142857 | 5.10E-14 |
| LOC339535 | 1,559  | 2.92   | 7.13   | 2.441780822 | 4.11E-08 |
| LOC339804 | 0.701  | 0.57   | 7.93   | 13.9122807  | 1.90E-13 |
| LOC341056 | 1,026  | 2.02   | 8.13   | 4.024752475 | 3.05E-11 |
| LOC341965 | 1.02   | 1.65   | 7.35   | 4.454545455 | 1.14E-10 |
| LOC342918 | 1,289  | 2.38   | 12.75  | 5.357142857 | 0        |
| LOC343508 | 2,312  | 2.57   | 6.67   | 2.595330739 | 1.04E-11 |
| LOC344653 | 1,867  | 0.90   | 4.69   | 5.211111111 | 2.19E-13 |
| LOC344978 | 57,183 | 0.17   | 0.54   | 3.176470588 | 0        |
| LOC345829 | 0.832  | 7.25   | 27.44  | 3.784827586 | 0        |
| LOC346085 | 1,248  | 10.70  | 37.39  | 3.494392523 | 0        |
| LOC348180 | 1,936  | 2.14   | 5.57   | 2.602803738 | 6.74E-09 |
| LOC348801 | 2,991  | 0.50   | 2.20   | 4.4         | 1.79E-09 |
| LOC359724 | 1,848  | 219.07 | 611.76 | 2.792532067 | 0        |
| LOC374395 | 0.864  | 18.90  | 45.04  | 2.383068783 | 0        |
| LOC374920 | 2,278  | 2.12   | 10.07  | 4.75        | 0        |
| LOC387703 | 4,653  | 1.21   | 3.98   | 3.289256198 | 0        |
| LOC387787 | 1,897  | 0.62   | 3.11   | 5.016129032 | 8.01E-10 |
| LOC388177 | 1,037  | 5.63   | 13.97  | 2.481349911 | 2.02E-10 |
| LOC388692 | 3,389  | 3.10   | 7.21   | 2.325806452 | 6.00E-15 |
| LOC388734 | 1,191  | 0.83   | 7.92   | 9.542168675 | 0        |
| LOC389137 | 2,069  | 0.91   | 4.85   | 5.32967033  | 1.00E-15 |
| LOC389168 | 1,763  | 7.69   | 18.35  | 2.386215865 | 0        |
| LOC389203 | 1,207  | 4.59   | 13.33  | 2.904139434 | 4.30E-14 |
| LOC389257 | 1,573  | 0.88   | 13.83  | 15.71590909 | 0        |
| LOC389333 | 3,163  | 0.78   | 7.21   | 9.243589744 | 0        |

|           |         |        |         |             |          |
|-----------|---------|--------|---------|-------------|----------|
| LOC389386 | 1,616   | 2.51   | 11.78   | 4.693227092 | 0        |
| LOC389842 | 1,048   | 2.83   | 16.55   | 5.848056537 | 0        |
| LOC389849 | 1,153   | 22.40  | 49.75   | 2.220982143 | 0        |
| LOC389901 | 15,867  | 0.80   | 1.95    | 2.4375      | 0        |
| LOC389990 | 0.796   | 1.37   | 7.72    | 5.635036496 | 1.77E-10 |
| LOC390107 | 0.402   | 75.06  | 250.82  | 3.341593392 | 0        |
| LOC390394 | 4.86    | 0.59   | 3.52    | 5.966101695 | 0        |
| LOC390407 | 1,212   | 3.67   | 11.39   | 3.103542234 | 4.22E-13 |
| LOC390415 | 42,753  | 0.04   | 0.41    | 10.25       | 0        |
| LOC390561 | 92,435  | 0.08   | 0.24    | 3           | 0        |
| LOC390844 | 1,483   | 1.93   | 9.83    | 5.093264249 | 0        |
| LOC391039 | 0.939   | 8.01   | 17.94   | 2.239700375 | 4.61E-10 |
| LOC391135 | 1,413   | 7.21   | 17.05   | 2.364771151 | 3.00E-15 |
| LOC391358 | 0.59    | 10.23  | 35.55   | 3.475073314 | 0        |
| LOC391696 | 3,792   | 0.31   | 2.15    | 6.935483871 | 2.00E-15 |
| LOC391777 | 0.863   | 16.05  | 40.71   | 2.536448598 | 0        |
| LOC391811 | 1,422   | 1.60   | 5.98    | 3.7375      | 2.88E-10 |
| LOC391828 | 0.406   | 560.48 | 1352.34 | 2.412824722 | 0        |
| LOC392358 | 0.741   | 4.81   | 21.26   | 4.41995842  | 0        |
| LOC392437 | 0.743   | 11.32  | 49.65   | 4.386042403 | 0        |
| LOC392617 | 5,186   | 6.46   | 24.71   | 3.825077399 | 0        |
| LOC399748 | 1,633   | 6.66   | 14.08   | 2.114114114 | 3.66E-12 |
| LOC399804 | 1.08    | 1.28   | 11.15   | 8.7109375   | 0        |
| LOC399942 | 1,616   | 3.85   | 10.58   | 2.748051948 | 3.30E-14 |
| LOC400011 | 3,628   | 2.02   | 6.83    | 3.381188119 | 0        |
| LOC400036 | 2,585   | 0.31   | 4.34    | 14          | 0        |
| LOC400126 | 3,362   | 8.92   | 26.14   | 2.930493274 | 0        |
| LOC400506 | 3,817   | 0.34   | 6.76    | 19.88235294 | 0        |
| LOC401010 | 2,723   | 0.94   | 3.65    | 3.882978723 | 1.32E-12 |
| LOC401152 | 1.45    | 7.09   | 39.61   | 5.58674189  | 0        |
| LOC401308 | 4,548   | 2.20   | 10.06   | 4.572727273 | 0        |
| LOC401433 | 5,816   | 3.46   | 8.02    | 2.317919075 | 0        |
| LOC401602 | 2,798   | 1.66   | 3.98    | 2.397590361 | 4.11E-08 |
| LOC402226 | 12,371  | 0.11   | 0.85    | 7.727272727 | 0        |
| LOC402359 | 109,665 | 0.06   | 0.16    | 2.666666667 | 8.90E-14 |
| LOC407835 | 3,474   | 4.50   | 9.26    | 2.057777778 | 3.00E-15 |
| LOC432369 | 0.368   | 55.39  | 111.93  | 2.02076187  | 0        |

|           |         |        |        |             |          |
|-----------|---------|--------|--------|-------------|----------|
| LOC440525 | 1,134   | 9.33   | 29.64  | 3.176848875 | 0        |
| LOC440917 | 1.77    | 19.34  | 46.12  | 2.384694933 | 0        |
| LOC440995 | 1.08    | 0.92   | 7.90   | 8.586956522 | 0        |
| LOC441034 | 0.891   | 8.99   | 29.02  | 3.228031146 | 0        |
| LOC441073 | 0.536   | 203.78 | 448.21 | 2.199479831 | 0        |
| LOC441481 | 0.606   | 17.31  | 35.17  | 2.031773541 | 2.09E-10 |
| LOC441505 | 1,632   | 1.40   | 16.62  | 11.87142857 | 0        |
| LOC441550 | 3,444   | 1.09   | 3.28   | 3.009174312 | 4.80E-11 |
| LOC441581 | 2,078   | 0.19   | 5.31   | 27.94736842 | 0        |
| LOC441726 | 0.413   | 16.77  | 104.63 | 6.239117472 | 0        |
| LOC441774 | 2,043   | 10.99  | 35.50  | 3.230209281 | 0        |
| LOC441775 | 0.569   | 50.60  | 145.08 | 2.867193676 | 0        |
| LOC442017 | 0.444   | 6.69   | 19.54  | 2.92077728  | 2.53E-08 |
| LOC442086 | 0.625   | 37.83  | 308.78 | 8.162305049 | 0        |
| LOC442087 | 1.29    | 2.68   | 10.84  | 4.044776119 | 0        |
| LOC442112 | 1,912   | 6.57   | 16.12  | 2.453576865 | 0        |
| LOC442156 | 124,838 | 0.03   | 0.10   | 3.333333333 | 2.27E-13 |
| LOC442263 | 14,098  | 0.13   | 0.91   | 7           | 0        |
| LOC442267 | 1,611   | 1.11   | 12.29  | 11.07207207 | 0        |
| LOC442309 | 0.881   | 4.49   | 16.22  | 3.61247216  | 1.00E-15 |
| LOC442720 | 1,974   | 2.40   | 8.62   | 3.591666667 | 0        |
| LOC442777 | 0.568   | 23.17  | 79.94  | 3.450151057 | 0        |
| LOC4687   | 3,328   | 2.32   | 6.13   | 2.642241379 | 2.00E-15 |
| LOC497661 | 1,085   | 7.75   | 18.09  | 2.334193548 | 2.39E-12 |
| LOC51136  | 1,893   | 2.14   | 5.43   | 2.537383178 | 3.32E-08 |
| LOC57228  | 1,239   | 5.59   | 31.48  | 5.631484794 | 0        |
| LOC573971 | 3,497   | 0.99   | 7.93   | 8.01010101  | 0        |
| LOC642043 | 14,393  | 0.81   | 2.09   | 2.580246914 | 0        |
| LOC642072 | 40,331  | 2.11   | 4.24   | 2.009478673 | 0        |
| LOC642074 | 15,574  | 0.76   | 1.94   | 2.552631579 | 0        |
| LOC642259 | 1,045   | 12.59  | 44.82  | 3.559968229 | 0        |
| LOC642357 | 1.31    | 15.18  | 44.82  | 2.95256917  | 0        |
| LOC642585 | 1.78    | 2.50   | 8.38   | 3.352       | 2.00E-15 |
| LOC642784 | 1,368   | 14.90  | 39.23  | 2.632885906 | 0        |
| LOC642954 | 2,305   | 4.12   | 11.08  | 2.689320388 | 0        |
| LOC642975 | 1,471   | 3.70   | 15.41  | 4.164864865 | 0        |
| LOC643031 | 0.513   | 95.66  | 223.81 | 2.339640393 | 0        |

|           |        |        |        |             |          |
|-----------|--------|--------|--------|-------------|----------|
| LOC643193 | 0.459  | 11.21  | 41.30  | 3.684210526 | 0        |
| LOC643536 | 1,717  | 0.69   | 3.73   | 5.405797101 | 1.29E-10 |
| LOC643586 | 24,498 | 0.47   | 2.25   | 4.787234043 | 0        |
| LOC643737 | 1,272  | 3.73   | 23.91  | 6.410187668 | 0        |
| LOC643836 | 17.14  | 0.40   | 0.97   | 2.425       | 2.48E-11 |
| LOC644029 | 0.908  | 56.22  | 132.20 | 2.351476343 | 0        |
| LOC644082 | 3,011  | 31.91  | 89.08  | 2.791601379 | 0        |
| LOC644096 | 1,147  | 5.00   | 12.26  | 2.452       | 9.48E-10 |
| LOC644220 | 1,126  | 8.96   | 21.77  | 2.4296875   | 0        |
| LOC644422 | 1,445  | 9.38   | 24.02  | 2.560767591 | 0        |
| LOC644693 | 6,033  | 0.41   | 1.74   | 4.243902439 | 8.20E-14 |
| LOC644714 | 3,156  | 18.99  | 53.01  | 2.791469194 | 0        |
| LOC644745 | 2,379  | 1.33   | 4.71   | 3.541353383 | 1.09E-12 |
| LOC644877 | 1,042  | 3.23   | 13.90  | 4.303405573 | 0        |
| LOC644879 | 0.866  | 1.83   | 9.04   | 4.93989071  | 9.71E-12 |
| LOC644909 | 51,151 | 0.03   | 0.48   | 16          | 0        |
| LOC644969 | 0.662  | 78.01  | 182.76 | 2.342776567 | 0        |
| LOC645668 | 1,358  | 7.28   | 18.92  | 2.598901099 | 0        |
| LOC645807 | 1,894  | 5.59   | 14.59  | 2.610017889 | 0        |
| LOC645870 | 1,009  | 5.69   | 35.48  | 6.235500879 | 0        |
| LOC645899 | 0.424  | 18.90  | 54.04  | 2.859259259 | 0        |
| LOC645957 | 1,667  | 6.11   | 17.99  | 2.944353519 | 0        |
| LOC646195 | 0.648  | 400.94 | 954.54 | 2.380755225 | 0        |
| LOC646214 | 6,629  | 1.09   | 2.24   | 2.055045872 | 1.01E-07 |
| LOC646348 | 0.213  | 4.65   | 26.89  | 5.782795699 | 7.06E-10 |
| LOC646532 | 12,163 | 0.88   | 2.65   | 3.011363636 | 0        |
| LOC646547 | 18.16  | 0.19   | 0.65   | 3.421052632 | 4.10E-13 |
| LOC646572 | 1,587  | 0.75   | 5.94   | 7.92        | 0        |
| LOC646778 | 2,194  | 0.09   | 3.92   | 43.55555556 | 0        |
| LOC646837 | 3,153  | 6.43   | 15.28  | 2.376360809 | 0        |
| LOC647020 | 17.6   | 0.21   | 0.88   | 4.19047619  | 0        |
| LOC647076 | 6,461  | 1.23   | 3.10   | 2.520325203 | 3.00E-14 |
| LOC647086 | 1,493  | 1.19   | 5.47   | 4.596638655 | 1.15E-11 |
| LOC647087 | 1,548  | 4.34   | 17.90  | 4.124423963 | 0        |
| LOC647302 | 0.31   | 13.09  | 45.10  | 3.445378151 | 4.00E-15 |
| LOC647307 | 1,342  | 7.89   | 17.26  | 2.187579214 | 7.91E-13 |
| LOC648603 | 0.651  | 4.86   | 19.15  | 3.940329218 | 2.00E-15 |

|           |        |       |        |             |          |
|-----------|--------|-------|--------|-------------|----------|
| LOC652968 | 1,508  | 0.46  | 4.13   | 8.97826087  | 5.33E-13 |
| LOC653115 | 1.19   | 9.98  | 26.12  | 2.617234469 | 0        |
| LOC653122 | 2,176  | 4.00  | 18.86  | 4.715       | 0        |
| LOC653214 | 0.787  | 66.13 | 247.25 | 3.738847724 | 0        |
| LOC653364 | 0.585  | 28.58 | 113.90 | 3.985304409 | 0        |
| LOC653553 | 24,903 | 0.12  | 0.42   | 3.5         | 1.03E-11 |
| LOC653566 | 1.96   | 9.13  | 18.66  | 2.04381161  | 0        |
| LOC654350 | 0.797  | 1.37  | 7.52   | 5.489051095 | 4.84E-10 |
| LOC654480 | 0.627  | 32.98 | 76.31  | 2.313826562 | 0        |
| LOC723972 | 0.738  | 13.54 | 32.18  | 2.376661743 | 6.00E-15 |
| LOC727726 | 2,542  | 0.78  | 5.20   | 6.666666667 | 0        |
| LOC727728 | 1,097  | 2.61  | 9.14   | 3.501915709 | 1.10E-11 |
| LOC728041 | 6,221  | 0.44  | 1.49   | 3.386363636 | 1.58E-10 |
| LOC728044 | 42,489 | 0.04  | 0.19   | 4.75        | 6.53E-12 |
| LOC728071 | 2,405  | 0.45  | 6.97   | 15.48888889 | 0        |
| LOC728110 | 1,606  | 6.53  | 24.45  | 3.744257274 | 0        |
| LOC728131 | 1,493  | 43.01 | 112.90 | 2.624970937 | 0        |
| LOC728358 | 0.493  | 3.21  | 14.87  | 4.632398754 | 1.11E-10 |
| LOC728509 | 3,388  | 0.47  | 2.16   | 4.595744681 | 1.81E-10 |
| LOC728532 | 19,929 | 0.42  | 1.01   | 2.404761905 | 2.65E-13 |
| LOC728560 | 2,998  | 1.62  | 9.83   | 6.067901235 | 0        |
| LOC728602 | 15,548 | 0.28  | 0.70   | 2.5         | 3.92E-08 |
| LOC728622 | 0.871  | 4.54  | 17.80  | 3.920704846 | 0        |
| LOC728669 | 0.519  | 27.83 | 110.04 | 3.954006468 | 0        |
| LOC728688 | 1,839  | 1.83  | 22.30  | 12.18579235 | 0        |
| LOC728698 | 6,566  | 1.16  | 2.36   | 2.034482759 | 7.08E-08 |
| LOC728892 | 0.516  | 0.58  | 11.91  | 20.53448276 | 0        |
| LOC728995 | 0.678  | 2.48  | 94.03  | 37.91532258 | 0        |
| LOC729063 | 0.531  | 7.46  | 68.56  | 9.190348525 | 0        |
| LOC729086 | 2.95   | 2.59  | 5.22   | 2.015444015 | 1.27E-07 |
| LOC729433 | 1,005  | 2.46  | 14.20  | 5.772357724 | 0        |
| LOC729440 | 1,825  | 0.76  | 8.12   | 10.68421053 | 0        |
| LOC729494 | 0.959  | 14.55 | 41.90  | 2.879725086 | 0        |
| LOC729518 | 1,883  | 1.37  | 5.19   | 3.788321168 | 7.77E-12 |
| LOC729554 | 0.825  | 4.20  | 13.79  | 3.283333333 | 7.36E-12 |
| LOC729646 | 6.91   | 6.64  | 15.36  | 2.313253012 | 0        |
| LOC729666 | 37,964 | 0.08  | 0.28   | 3.5         | 4.31E-12 |

|           |       |       |       |             |          |
|-----------|-------|-------|-------|-------------|----------|
| LOC729678 | 2,392 | 3.06  | 6.90  | 2.254901961 | 6.21E-10 |
| LOC729683 | 2,086 | 1.66  | 5.37  | 3.234939759 | 1.69E-11 |
| LOC729708 | 1,997 | 4.86  | 26.45 | 5.442386831 | 0        |
| LOC729948 | 0.258 | 6.52  | 51.26 | 7.86196319  | 0        |
| LOC729976 | 1,069 | 5.28  | 13.24 | 2.507575758 | 2.73E-10 |
| LOC730050 | 3,503 | 13.98 | 30.97 | 2.215307582 | 0        |
| LOC730069 | 8,187 | 0.20  | 0.95  | 4.75        | 9.71E-12 |
| LOC730101 | 8,263 | 0.27  | 3.54  | 13.11111111 | 0        |
| LOC730138 | 0.489 | 11.53 | 38.42 | 3.33217693  | 0        |
| LOC84661  | 0.8   | 3.96  | 17.16 | 4.333333333 | 0        |
| LOC90120  | 2,799 | 0.88  | 12.31 | 13.98863636 | 0        |
| LOC92312  | 5,917 | 0.17  | 1.92  | 11.29411765 | 0        |
| LOC92755  | 1,516 | 4.77  | 15.72 | 3.295597484 | 0        |
| LPXN      | 1,833 | 2.76  | 7.03  | 2.547101449 | 8.67E-10 |
| LRFN1     | 3,381 | 1.29  | 5.70  | 4.418604651 | 0        |
| LRFN2     | 3,144 | 1.20  | 7.96  | 6.633333333 | 0        |
| LRFN4     | 2,431 | 3.01  | 10.43 | 3.465116279 | 0        |
| LRP11     | 3.58  | 0.47  | 3.55  | 7.553191489 | 0        |
| LRP3      | 2,577 | 2.61  | 17.75 | 6.800766284 | 0        |
| LRP5      | 5,099 | 9.54  | 29.75 | 3.118448637 | 0        |
| LRPAP1    | 1,484 | 18.00 | 44.95 | 2.497222222 | 0        |
| LRRC14    | 5,323 | 2.52  | 6.15  | 2.44047619  | 0        |
| LRRC17    | 5,726 | 0.03  | 1.90  | 63.33333333 | 0        |
| LRRC4     | 7,414 | 0.75  | 1.71  | 2.28        | 3.58E-08 |
| LRRC41    | 2,948 | 10.24 | 35.23 | 3.440429688 | 0        |
| LRRC42    | 1,714 | 2.25  | 5.90  | 2.622222222 | 2.67E-08 |
| LRRC45    | 2,599 | 0.76  | 5.25  | 6.907894737 | 0        |
| LRRC47    | 2,648 | 8.37  | 21.15 | 2.52688172  | 0        |
| LRRC59    | 2,828 | 11.23 | 31.90 | 2.840605521 | 0        |
| LRRC61    | 2,956 | 0.20  | 3.50  | 17.5        | 0        |
| LRRC62    | 7,579 | 2.15  | 40.87 | 19.00930233 | 0        |
| LRRC8D    | 3,312 | 2.90  | 8.80  | 3.034482759 | 0        |
| LRRC1     | 3.24  | 0.49  | 2.11  | 4.306122449 | 1.17E-09 |
| LRRN2     | 3,358 | 1.71  | 3.99  | 2.333333333 | 7.03E-09 |
| LSM10     | 0.85  | 5.24  | 24.68 | 4.709923664 | 0        |
| LSM12     | 2.21  | 3.00  | 9.37  | 3.123333333 | 0        |
| LSM14B    | 1,604 | 8.02  | 29.10 | 3.628428928 | 0        |

|         |        |       |        |             |          |
|---------|--------|-------|--------|-------------|----------|
| LSM3    | 0.555  | 24.95 | 55.70  | 2.23246493  | 0        |
| LSM4    | 1,109  | 18.65 | 55.07  | 2.952815013 | 0        |
| LSM6    | 0.579  | 7.69  | 22.70  | 2.951885566 | 4.58E-12 |
| LSM7    | 0.776  | 84.53 | 170.58 | 2.017981782 | 0        |
| LSMD1   | 0.999  | 18.82 | 47.64  | 2.531349628 | 0        |
| LSP1    | 2,745  | 20.69 | 62.84  | 3.037216046 | 0        |
| LTB4DH  | 1,242  | 5.10  | 20.28  | 3.976470588 | 0        |
| LTBP4   | 5,031  | 2.68  | 8.11   | 3.026119403 | 0        |
| LTBR    | 2,105  | 5.59  | 21.49  | 3.844364937 | 0        |
| LXN     | 1,113  | 3.20  | 9.69   | 3.028125    | 2.65E-10 |
| LYAR    | 1,508  | 0.92  | 15.47  | 16.81521739 | 0        |
| LYL1    | 1.49   | 21.52 | 46.30  | 2.151486989 | 0        |
| LYN     | 2,297  | 6.55  | 13.16  | 2.009160305 | 1.01E-13 |
| LYPLA2  | 1,624  | 5.36  | 14.16  | 2.641791045 | 0        |
| LYRM4   | 1,482  | 14.35 | 37.40  | 2.606271777 | 0        |
| LYRM7   | 6,213  | 0.70  | 1.84   | 2.628571429 | 4.54E-09 |
| LYSMD2  | 1,688  | 0.59  | 3.84   | 6.508474576 | 1.11E-11 |
| LZIC    | 1,407  | 2.81  | 9.76   | 3.473309609 | 6.00E-15 |
| LZTFL1  | 3,398  | 0.64  | 3.40   | 5.3125      | 0        |
| LZTS1   | 5,459  | 0.12  | 2.18   | 18.16666667 | 0        |
| M6PR    | 2,454  | 18.90 | 60.65  | 3.208994709 | 0        |
| M6PRBP1 | 2,236  | 13.80 | 112.45 | 8.148550725 | 0        |
| MAD2L2  | 1,041  | 13.69 | 42.00  | 3.067932798 | 0        |
| MAF     | 7,719  | 1.76  | 9.46   | 5.375       | 0        |
| MAFB    | 3,362  | 1.86  | 48.64  | 26.15053763 | 0        |
| MAGED1  | 2,971  | 15.18 | 40.77  | 2.685770751 | 0        |
| MAGED2  | 2,289  | 10.59 | 23.99  | 2.265344665 | 0        |
| MAGED4  | 3,258  | 2.64  | 10.55  | 3.996212121 | 0        |
| MAGEF1  | 1,682  | 4.29  | 12.52  | 2.918414918 | 0        |
| MAGEH1  | 1,462  | 1.69  | 7.26   | 4.295857988 | 3.20E-14 |
| MAGI1   | 12,411 | 1.04  | 3.03   | 2.913461538 | 0        |
| MAGI3   | 3,947  | 1.38  | 3.51   | 2.543478261 | 2.47E-10 |
| Magmas  | 0.511  | 5.03  | 27.03  | 5.373757455 | 0        |
| MAN1C1  | 2,884  | 2.71  | 7.74   | 2.856088561 | 0        |
| MAN2B2  | 4,242  | 3.06  | 8.97   | 2.931372549 | 0        |
| MANBAL  | 1,315  | 4.14  | 9.93   | 2.398550725 | 4.06E-09 |
| MANEAL  | 4,449  | 0.16  | 2.48   | 15.5        | 0        |



|           |        |       |        |             |          |
|-----------|--------|-------|--------|-------------|----------|
| MAP1A     | 10,244 | 0.60  | 6.90   | 11.5        | 0        |
| MAP1S     | 3,276  | 4.28  | 27.23  | 6.362149533 | 0        |
| MAP2K5    | 2,364  | 3.89  | 8.73   | 2.244215938 | 2.23E-12 |
| MAP3K10   | 3,428  | 1.09  | 4.74   | 4.348623853 | 0        |
| MAP3K11   | 3,573  | 11.82 | 44.91  | 3.799492386 | 0        |
| MAP3K15   | 4,697  | 0.52  | 2.25   | 4.326923077 | 2.00E-14 |
| MAP3K5    | 5,195  | 1.58  | 6.57   | 4.158227848 | 0        |
| MAP3K7    | 4,203  | 3.37  | 7.72   | 2.290801187 | 0        |
| MAP3K7IP1 | 3,862  | 4.04  | 10.15  | 2.512376238 | 0        |
| MAP7D3    | 4,528  | 2.12  | 6.10   | 2.877358491 | 0        |
| MAPBPIP   | 0.591  | 7.54  | 58.15  | 7.712201592 | 0        |
| MAPK12    | 1,754  | 1.08  | 8.21   | 7.601851852 | 0        |
| MAPKAP1   | 3,866  | 4.02  | 19.61  | 4.878109453 | 0        |
| MAPKAPK3  | 2.5    | 11.20 | 53.27  | 4.75625     | 0        |
| MARCKSL1  | 1,535  | 12.51 | 194.87 | 15.57713829 | 0        |
| MARK2     | 4,356  | 4.00  | 10.32  | 2.58        | 0        |
| MARK4     | 4,917  | 2.90  | 11.31  | 3.9         | 0        |
| MARVELD1  | 3,217  | 5.35  | 41.05  | 7.672897196 | 0        |
| MAST3     | 5,896  | 3.17  | 13.76  | 4.340694006 | 0        |
| MAT2A     | 3,014  | 17.04 | 55.25  | 3.242370892 | 0        |
| MAT2B     | 2,272  | 10.67 | 23.62  | 2.213683224 | 0        |
| MATK      | 2.61   | 2.88  | 7.65   | 2.65625     | 3.00E-15 |
| MAZ       | 2,785  | 79.29 | 179.79 | 2.267499054 | 0        |
| MBD3      | 2,559  | 8.04  | 41.12  | 5.114427861 | 0        |
| MBNL3     | 3,255  | 2.01  | 4.81   | 2.393034826 | 2.10E-10 |
| MBOAT5    | 2,297  | 5.26  | 18.15  | 3.450570342 | 0        |
| MCAM      | 3,332  | 18.68 | 48.54  | 2.598501071 | 0        |
| MCART1    | 1,397  | 0.43  | 3.89   | 9.046511628 | 1.61E-11 |
| MCAT      | 1,981  | 1.40  | 8.85   | 6.321428571 | 0        |
| MCCC2     | 4,658  | 1.25  | 4.07   | 3.256       | 0        |
| MCM10     | 4,661  | 0.29  | 1.56   | 5.379310345 | 4.17E-12 |
| MCM2      | 3,435  | 9.50  | 28.87  | 3.038947368 | 0        |
| MCM3      | 3,111  | 6.55  | 39.37  | 6.010687023 | 0        |
| MCM4      | 3,628  | 4.75  | 15.95  | 3.357894737 | 0        |
| MCM5      | 2,534  | 16.56 | 41.99  | 2.535628019 | 0        |
| MCM6      | 3,751  | 3.22  | 12.82  | 3.98136646  | 0        |
| MCM7      | 7,494  | 6.91  | 17.36  | 2.512301013 | 0        |

|          |       |       |       |             |          |
|----------|-------|-------|-------|-------------|----------|
| MCM8     | 4.27  | 0.70  | 3.18  | 4.542857143 | 0        |
| MCOLN1   | 2,051 | 1.79  | 6.53  | 3.648044693 | 3.00E-15 |
| MCRS1    | 1.97  | 9.44  | 23.82 | 2.523305085 | 0        |
| MCTS1    | 0.926 | 5.56  | 15.83 | 2.847122302 | 9.94E-13 |
| MDFI     | 1,558 | 1.15  | 49.58 | 43.11304348 | 0        |
| MDH1     | 1,268 | 17.94 | 54.68 | 3.04793757  | 0        |
| MDH2     | 2,925 | 17.63 | 41.63 | 2.361315939 | 0        |
| MDK      | 1,208 | 9.01  | 83.40 | 9.256381798 | 0        |
| MDM1     | 4,879 | 0.51  | 2.01  | 3.941176471 | 3.31E-12 |
| MDS032   | 0.843 | 10.68 | 29.08 | 2.722846442 | 0        |
| ME2      | 2,717 | 3.24  | 12.86 | 3.969135802 | 0        |
| MEA1     | 0.868 | 14.82 | 73.27 | 4.943994602 | 0        |
| MECR     | 2,744 | 1.33  | 5.95  | 4.473684211 | 0        |
| MED11    | 0.83  | 2.14  | 16.85 | 7.873831776 | 0        |
| MED12    | 6,645 | 7.64  | 23.98 | 3.138743455 | 0        |
| MED8     | 3,496 | 2.35  | 5.42  | 2.306382979 | 1.19E-11 |
| MED9     | 2,222 | 9.22  | 35.56 | 3.856832972 | 0        |
| MEF2C    | 9.25  | 35.03 | 76.79 | 2.192121039 | 0        |
| MEGF8    | 8,306 | 1.05  | 3.15  | 3           | 0        |
| MEN1     | 4,617 | 3.71  | 16.78 | 4.522911051 | 0        |
| MESDC2   | 4,243 | 2.50  | 11.95 | 4.78        | 0        |
| METTL1   | 2,574 | 0.38  | 4.25  | 11.18421053 | 0        |
| METTL2A  | 2,905 | 0.27  | 2.38  | 8.814814815 | 6.00E-15 |
| METTL2B  | 4,364 | 0.20  | 1.26  | 6.3         | 1.64E-10 |
| METTL5   | 0.939 | 2.10  | 14.71 | 7.004761905 | 0        |
| METTL7A  | 3.39  | 5.34  | 21.59 | 4.043071161 | 0        |
| MFAP1    | 2,063 | 4.41  | 14.74 | 3.342403628 | 0        |
| MFGE8    | 1,934 | 1.64  | 5.06  | 3.085365854 | 8.63E-10 |
| MFHAS1   | 3,754 | 9.20  | 19.06 | 2.07173913  | 0        |
| MFI2     | 3,222 | 1.20  | 5.20  | 4.333333333 | 0        |
| MFN2     | 4,539 | 12.86 | 27.69 | 2.15318818  | 0        |
| MFNG     | 2,034 | 19.94 | 42.53 | 2.132898696 | 0        |
| MFSD1    | 2,161 | 4.58  | 19.18 | 4.187772926 | 0        |
| MFSD3    | 1,446 | 0.48  | 12.41 | 25.85416667 | 0        |
| MFSD4    | 3,566 | 0.92  | 2.79  | 3.032608696 | 1.17E-09 |
| MGAT4B   | 4,233 | 4.18  | 8.68  | 2.076555024 | 0        |
| MGC10334 | 2,193 | 3.48  | 9.99  | 2.870689655 | 0        |

|          |        |        |        |             |          |
|----------|--------|--------|--------|-------------|----------|
| MGC13114 | 1,677  | 7.73   | 24.52  | 3.172056921 | 0        |
| MGC13379 | 1,052  | 1.23   | 6.65   | 5.406504065 | 1.88E-11 |
| MGC15523 | 5,035  | 3.88   | 24.86  | 6.407216495 | 0        |
| MGC16169 | 3.31   | 0.96   | 5.65   | 5.885416667 | 0        |
| MGC16385 | 2,742  | 0.94   | 2.91   | 3.095744681 | 3.78E-08 |
| MGC16824 | 3.55   | 3.37   | 10.27  | 3.047477745 | 0        |
| MGC19604 | 2,702  | 1.02   | 13.21  | 12.95098039 | 0        |
| MGC21675 | 2.44   | 2.48   | 10.10  | 4.072580645 | 0        |
| MGC2408  | 0.986  | 0.50   | 7.00   | 14          | 0        |
| MGC2752  | 3,073  | 1.23   | 7.37   | 5.991869919 | 0        |
| MGC29506 | 1,849  | 133.39 | 481.45 | 3.60934103  | 0        |
| MGC3032  | 5,415  | 1.13   | 5.73   | 5.07079646  | 0        |
| MGC3196  | 0.609  | 2.92   | 11.90  | 4.075342466 | 1.19E-09 |
| MGC3207  | 3,389  | 5.32   | 11.39  | 2.140977444 | 0        |
| MGC40499 | 2.94   | 1.79   | 5.22   | 2.916201117 | 1.29E-13 |
| MGC42367 | 3,863  | 1.02   | 3.91   | 3.833333333 | 0        |
| MGC4655  | 2,694  | 0.29   | 2.78   | 9.586206897 | 0        |
| MGC57346 | 1,879  | 0.74   | 4.71   | 6.364864865 | 1.00E-15 |
| MGLL     | 4,884  | 0.08   | 2.48   | 31          | 0        |
| MGMT     | 0.864  | 22.56  | 84.92  | 3.764184397 | 0        |
| MGST2    | 0.801  | 9.01   | 42.69  | 4.738068812 | 0        |
| MICAL3   | 6,515  | 2.84   | 6.72   | 2.366197183 | 0        |
| MICALL1  | 3,865  | 4.97   | 21.08  | 4.241448692 | 0        |
| MIF      | 0.561  | 149.73 | 513.98 | 3.432712215 | 0        |
| MIF4GD   | 1,412  | 3.36   | 10.74  | 3.196428571 | 6.00E-15 |
| MINA     | 2,494  | 1.08   | 8.48   | 7.851851852 | 0        |
| MINPP1   | 2,394  | 0.29   | 2.32   | 8           | 4.06E-11 |
| MITD1    | 0.91   | 3.26   | 10.46  | 3.208588957 | 6.69E-10 |
| MIZF     | 2.3    | 3.09   | 10.03  | 3.245954693 | 0        |
| MKI67    | 12,497 | 2.58   | 22.69  | 8.794573643 | 0        |
| MKI67IP  | 1.67   | 4.32   | 14.47  | 3.349537037 | 0        |
| MKKS     | 2,774  | 0.82   | 8.38   | 10.2195122  | 0        |
| MKL2     | 8,634  | 0.63   | 1.84   | 2.920634921 | 7.30E-14 |
| MKS1     | 2,397  | 1.08   | 6.12   | 5.666666667 | 0        |
| MLC1     | 4,174  | 1.73   | 15.82  | 9.144508671 | 0        |
| MLF1IP   | 2,533  | 2.89   | 6.32   | 2.186851211 | 3.03E-09 |
| MLH1     | 2,524  | 4.00   | 11.25  | 2.8125      | 0        |

|           |       |       |        |             |          |
|-----------|-------|-------|--------|-------------|----------|
| MLH3      | 7,896 | 0.73  | 1.81   | 2.479452055 | 3.32E-10 |
| MLKL      | 2,498 | 2.93  | 11.63  | 3.969283276 | 0        |
| MLLT1     | 4,505 | 3.12  | 12.03  | 3.855769231 | 0        |
| MLSTD1    | 2,095 | 1.00  | 8.57   | 8.57        | 0        |
| MMAB      | 2,348 | 1.22  | 6.02   | 4.93442623  | 0        |
| MMACHC    | 2,227 | 0.13  | 3.41   | 26.23076923 | 0        |
| MMP11     | 2,261 | 0.27  | 14.68  | 54.37037037 | 0        |
| MMP15     | 4,438 | 0.20  | 1.88   | 9.4         | 0        |
| MMP17     | 2,411 | 8.91  | 75.50  | 8.47362514  | 0        |
| MND1      | 0.941 | 0.52  | 8.68   | 16.69230769 | 0        |
| MOBKL2A   | 3,531 | 27.52 | 82.97  | 3.014898256 | 0        |
| MOBKL2C   | 3,392 | 1.64  | 4.69   | 2.859756098 | 1.39E-13 |
| MOCS2     | 2,329 | 1.79  | 8.61   | 4.810055866 | 0        |
| MON1A     | 2,038 | 0.49  | 6.45   | 13.16326531 | 0        |
| MOSPD1    | 2,358 | 0.34  | 2.61   | 7.676470588 | 3.88E-12 |
| MOSPD3    | 3,322 | 0.95  | 5.30   | 5.578947368 | 0        |
| MPDU1     | 1.4   | 8.98  | 37.32  | 4.155902004 | 0        |
| MPG       | 1,831 | 13.13 | 33.84  | 2.577303884 | 0        |
| MPHOSPH10 | 2,483 | 2.55  | 8.04   | 3.152941176 | 0        |
| MPHOSPH6  | 1.08  | 1.38  | 8.50   | 6.15942029  | 1.00E-15 |
| MPI       | 1,771 | 3.57  | 36.81  | 10.31092437 | 0        |
| MPND      | 1,513 | 5.43  | 13.09  | 2.4106814   | 4.33E-13 |
| MPP6      | 4,374 | 0.79  | 5.71   | 7.227848101 | 0        |
| MPV17     | 0.998 | 10.71 | 50.81  | 4.744164332 | 0        |
| MPZL1     | 6,897 | 2.29  | 6.53   | 2.851528384 | 0        |
| MRAP      | 1,234 | 0.72  | 4.60   | 6.388888889 | 3.69E-10 |
| MRC1      | 5,171 | 4.04  | 12.12  | 3           | 0        |
| MRC1L1    | 5,171 | 7.02  | 49.79  | 7.092592593 | 0        |
| MRCL3     | 1,229 | 48.38 | 104.80 | 2.166184374 | 0        |
| MRLC2     | 0.879 | 44.23 | 94.97  | 2.147185168 | 0        |
| MRM1      | 1,833 | 0.54  | 6.85   | 12.68518519 | 0        |
| MRP63     | 2,658 | 4.13  | 17.72  | 4.290556901 | 0        |
| MRPL11    | 1,249 | 12.68 | 32.31  | 2.548107256 | 0        |
| MRPL12    | 1     | 6.63  | 49.45  | 7.45852187  | 0        |
| MRPL17    | 1,044 | 2.56  | 30.18  | 11.7890625  | 0        |
| MRPL18    | 0.971 | 16.10 | 41.04  | 2.549068323 | 0        |
| MRPL19    | 7,827 | 0.91  | 2.17   | 2.384615385 | 3.15E-11 |

|         |       |       |        |             |          |
|---------|-------|-------|--------|-------------|----------|
| MRPL2   | 1,286 | 11.00 | 24.56  | 2.232727273 | 0        |
| MRPL20  | 0.681 | 18.74 | 49.11  | 2.620597652 | 0        |
| MRPL24  | 1,006 | 4.33  | 46.89  | 10.82909931 | 0        |
| MRPL27  | 3,158 | 1.56  | 6.77   | 4.33974359  | 0        |
| MRPL28  | 1,099 | 14.22 | 49.06  | 3.450070323 | 0        |
| MRPL3   | 1,733 | 7.25  | 21.48  | 2.962758621 | 0        |
| MRPL34  | 0.968 | 9.50  | 38.46  | 4.048421053 | 0        |
| MRPL35  | 3,336 | 1.78  | 6.04   | 3.393258427 | 0        |
| MRPL36  | 0.604 | 9.18  | 34.45  | 3.752723312 | 0        |
| MRPL37  | 1,478 | 23.56 | 49.81  | 2.11417657  | 0        |
| MRPL38  | 1,868 | 12.76 | 30.30  | 2.37460815  | 0        |
| MRPL4   | 3,064 | 7.65  | 17.45  | 2.281045752 | 0        |
| MRPL43  | 3,318 | 5.52  | 14.85  | 2.690217391 | 0        |
| MRPL46  | 0.985 | 4.82  | 13.17  | 2.732365145 | 1.02E-10 |
| MRPL49  | 2,089 | 12.74 | 25.85  | 2.029042386 | 0        |
| MRPL51  | 0.663 | 19.85 | 115.87 | 5.837279597 | 0        |
| MRPL52  | 2,463 | 2.04  | 6.81   | 3.338235294 | 0        |
| MRPL54  | 0.609 | 16.09 | 40.81  | 2.536357986 | 0        |
| MRPS11  | 1,415 | 5.39  | 17.86  | 3.313543599 | 0        |
| MRPS12  | 1,606 | 4.19  | 18.78  | 4.482100239 | 0        |
| MRPS14  | 1,081 | 4.94  | 14.03  | 2.840080972 | 5.38E-13 |
| MRPS16  | 2,634 | 10.70 | 21.53  | 2.012149533 | 0        |
| MRPS17  | 1,172 | 3.21  | 8.62   | 2.685358255 | 2.08E-08 |
| MRPS18A | 1.06  | 10.55 | 25.91  | 2.455924171 | 0        |
| MRPS18C | 1,014 | 5.17  | 14.79  | 2.86073501  | 6.09E-13 |
| MRPS2   | 1,434 | 11.46 | 28.54  | 2.490401396 | 0        |
| MRPS23  | 0.903 | 8.43  | 26.03  | 3.087781732 | 0        |
| MRPS26  | 1,039 | 5.15  | 38.43  | 7.462135922 | 0        |
| MRPS28  | 0.707 | 4.20  | 14.06  | 3.347619048 | 8.48E-11 |
| MRPS31  | 1,284 | 3.23  | 10.17  | 3.148606811 | 3.95E-13 |
| MRPS34  | 1,003 | 10.75 | 56.86  | 5.289302326 | 0        |
| MRPS5   | 1,661 | 6.37  | 25.51  | 4.004709576 | 0        |
| MRPS6   | 0.986 | 11.04 | 47.68  | 4.31884058  | 0        |
| MRPS7   | 1,371 | 11.62 | 26.23  | 2.257314974 | 0        |
| MRTO4   | 1,185 | 3.51  | 19.46  | 5.544159544 | 0        |
| MRV11   | 3,959 | 0.18  | 5.83   | 32.38888889 | 0        |
| MS4A1   | 3.61  | 30.64 | 114.06 | 3.722584856 | 0        |

|         |        |        |        |             |          |
|---------|--------|--------|--------|-------------|----------|
| MS4A4A  | 1,811  | 0.87   | 5.81   | 6.67816092  | 0        |
| MSGN1   | 0.582  | 0.17   | 32.95  | 193.8235294 | 0        |
| MSH2    | 3,145  | 1.64   | 9.21   | 5.615853659 | 0        |
| MSRA    | 1,482  | 8.75   | 22.85  | 2.611428571 | 0        |
| MSRB2   | 0.908  | 1.53   | 13.64  | 8.91503268  | 0        |
| MST101  | 3,491  | 1.53   | 5.07   | 3.31372549  | 0        |
| MT1E    | 0.506  | 6.65   | 26.47  | 3.980451128 | 0        |
| MT1F    | 0.438  | 1.13   | 32.70  | 28.9380531  | 0        |
| MT1G    | 0.396  | 1.25   | 34.89  | 27.912      | 0        |
| MTA2    | 3,235  | 27.93  | 69.62  | 2.492660222 | 0        |
| MTCH2   | 2,474  | 7.03   | 16.14  | 2.295874822 | 0        |
| MTFMT   | 1,736  | 0.97   | 4.81   | 4.958762887 | 9.66E-13 |
| MTG1    | 1,614  | 5.15   | 10.65  | 2.067961165 | 7.08E-09 |
| MTHFD1  | 3.11   | 3.11   | 15.44  | 4.964630225 | 0        |
| MTHFD1L | 3,598  | 1.57   | 6.35   | 4.044585987 | 0        |
| MTHFD2  | 2,589  | 1.52   | 6.71   | 4.414473684 | 0        |
| MTHFS   | 0.857  | 1.27   | 7.47   | 5.881889764 | 3.90E-11 |
| MTHFSD  | 2,308  | 2.49   | 7.16   | 2.875502008 | 2.40E-14 |
| MTP18   | 1,762  | 2.13   | 9.14   | 4.291079812 | 0        |
| MUC4    | 8,671  | 16.22  | 49.82  | 3.071516646 | 0        |
| MUM1    | 4,179  | 1.16   | 9.09   | 7.836206897 | 0        |
| MUS81   | 2,319  | 4.52   | 18.20  | 4.026548673 | 0        |
| MVK     | 1,952  | 0.30   | 3.24   | 10.8        | 6.00E-15 |
| MXD3    | 1,049  | 11.88  | 32.68  | 2.750841751 | 0        |
| MXRA7   | 5,207  | 11.04  | 30.10  | 2.726449275 | 0        |
| MYBBP1A | 5,537  | 6.86   | 15.50  | 2.259475219 | 0        |
| MYBL2   | 2,713  | 7.84   | 24.71  | 3.151785714 | 0        |
| MYBPC2  | 3,561  | 0.36   | 4.97   | 13.80555556 | 0        |
| MYC     | 2,359  | 3.98   | 27.78  | 6.979899497 | 0        |
| MYCBP   | 2,093  | 2.12   | 10.66  | 5.028301887 | 0        |
| MYD88   | 2,814  | 7.70   | 24.85  | 3.227272727 | 0        |
| MYH10   | 7,619  | 2.82   | 7.21   | 2.556737589 | 0        |
| MYL6    | 2,639  | 146.70 | 758.04 | 5.167280164 | 0        |
| MYL6B   | 0.869  | 34.38  | 86.76  | 2.523560209 | 0        |
| MYL9    | 1,187  | 16.42  | 42.51  | 2.588915956 | 0        |
| MYLK    | 12,152 | 2.22   | 7.71   | 3.472972973 | 0        |
| MYO1B   | 4,825  | 2.95   | 15.20  | 5.152542373 | 0        |

|          |        |       |        |             |          |
|----------|--------|-------|--------|-------------|----------|
| MYO3A    | 5,584  | 0.48  | 2.32   | 4.833333333 | 0        |
| MYO7A    | 7,462  | 5.99  | 12.27  | 2.048414023 | 0        |
| NADK     | 3,235  | 8.93  | 22.29  | 2.496080627 | 0        |
| NAG      | 7,282  | 2.85  | 18.48  | 6.484210526 | 0        |
| NAGA     | 3,606  | 3.13  | 18.97  | 6.060702875 | 0        |
| NAGPA    | 2,203  | 3.01  | 7.07   | 2.348837209 | 4.91E-10 |
| NAPA     | 1,842  | 24.34 | 53.14  | 2.183237469 | 0        |
| NAPRT1   | 1,857  | 10.28 | 26.17  | 2.545719844 | 0        |
| NARG2    | 7,564  | 1.52  | 3.99   | 2.625       | 0        |
| NARS2    | 2,098  | 2.21  | 9.59   | 4.339366516 | 0        |
| NASPP1   | 3,031  | 4.90  | 11.59  | 2.365306122 | 0        |
| NAT10    | 4,002  | 9.15  | 25.17  | 2.750819672 | 0        |
| NAT5     | 1,746  | 7.48  | 23.21  | 3.102941176 | 0        |
| NAV1     | 12,132 | 13.01 | 26.07  | 2.003843198 | 0        |
| NBR2     | 1,368  | 1.95  | 6.78   | 3.476923077 | 1.58E-10 |
| NCAPD2   | 4,486  | 4.41  | 29.37  | 6.659863946 | 0        |
| NCAPD3   | 6,037  | 3.88  | 8.55   | 2.203608247 | 0        |
| NCAPG    | 4,664  | 1.59  | 4.63   | 2.911949686 | 0        |
| NCAPG2   | 10,506 | 0.74  | 2.06   | 2.783783784 | 0        |
| NCAPH    | 4,495  | 1.03  | 5.38   | 5.223300971 | 0        |
| NCBP2    | 2,884  | 11.25 | 24.66  | 2.192       | 0        |
| NCDN     | 3,973  | 0.44  | 9.16   | 20.81818182 | 0        |
| NCF1     | 2,796  | 3.32  | 10.33  | 3.111445783 | 0        |
| NCF2     | 2,389  | 11.26 | 26.51  | 2.354351687 | 0        |
| NCF4     | 2,215  | 15.90 | 67.31  | 4.233333333 | 0        |
| NCKAP1L  | 4,559  | 19.30 | 48.96  | 2.536787565 | 0        |
| NCKIPSD  | 3,054  | 0.36  | 7.61   | 21.13888889 | 0        |
| NCL      | 3,099  | 89.36 | 240.21 | 2.688115488 | 0        |
| NCOA5    | 3,209  | 7.58  | 20.27  | 2.67414248  | 0        |
| NDC80    | 2,072  | 3.16  | 7.52   | 2.379746835 | 2.10E-10 |
| NDFIP1   | 2,533  | 3.94  | 9.54   | 2.421319797 | 1.00E-15 |
| NDRG2    | 2,199  | 3.78  | 17.00  | 4.497354497 | 0        |
| NDRG3    | 2,964  | 3.71  | 17.85  | 4.811320755 | 0        |
| NDUFA11  | 0.799  | 38.76 | 99.73  | 2.573013416 | 0        |
| NDUFA12  | 0.6    | 22.59 | 61.49  | 2.722000885 | 0        |
| NDUFA12L | 0.622  | 3.18  | 17.20  | 5.408805031 | 0        |
| NDUFA13  | 0.959  | 73.45 | 178.84 | 2.434853642 | 0        |

|          |        |       |        |             |          |
|----------|--------|-------|--------|-------------|----------|
| NDUFA3   | 0.341  | 23.21 | 120.79 | 5.204222318 | 0        |
| NDUFA4P1 | 0.63   | 10.99 | 23.80  | 2.165605096 | 1.46E-08 |
| NDUFA7   | 0.511  | 27.69 | 63.14  | 2.280245576 | 0        |
| NDUFA8   | 0.844  | 2.69  | 35.93  | 13.35687732 | 0        |
| NDUFAB1  | 0.667  | 20.91 | 47.23  | 2.258727881 | 0        |
| NDUFAF1  | 1,457  | 0.34  | 7.29   | 21.44117647 | 0        |
| NDUFB10  | 0.695  | 39.71 | 94.65  | 2.383530597 | 0        |
| NDUFB2   | 0.99   | 7.09  | 27.57  | 3.888575458 | 0        |
| NDUFB3   | 0.675  | 7.92  | 31.83  | 4.018939394 | 0        |
| NDUFB3P4 | 0.456  | 2.38  | 12.93  | 5.432773109 | 8.01E-10 |
| NDUFB5   | 1,059  | 12.61 | 33.81  | 2.681205393 | 0        |
| NDUFC2   | 2,138  | 7.91  | 21.51  | 2.719342604 | 0        |
| NDUFS3   | 1,627  | 30.04 | 68.30  | 2.273635153 | 0        |
| NDUFS6   | 2,337  | 24.51 | 97.04  | 3.959200326 | 0        |
| NDUFS7   | 1,702  | 16.57 | 46.24  | 2.790585395 | 0        |
| NDUFS8   | 0.779  | 23.37 | 81.21  | 3.474967908 | 0        |
| NDUFV3   | 2.13   | 2.32  | 10.28  | 4.431034483 | 0        |
| NECAP2   | 2,397  | 25.22 | 123.33 | 4.890166534 | 0        |
| NEDD4    | 10,567 | 0.37  | 1.33   | 3.594594595 | 1.00E-15 |
| NEDD8    | 0.606  | 43.75 | 187.80 | 4.292571429 | 0        |
| NEGR1    | 5,669  | 4.55  | 24.93  | 5.479120879 | 0        |
| NEIL2    | 2,661  | 3.60  | 8.54   | 2.372222222 | 1.20E-14 |
| NEK1     | 5,501  | 0.34  | 2.02   | 5.941176471 | 0        |
| NEK2     | 2.13   | 0.28  | 3.72   | 13.28571429 | 0        |
| NEK6     | 2,582  | 2.95  | 11.40  | 3.86440678  | 0        |
| NEK9     | 3,244  | 4.12  | 11.81  | 2.866504854 | 0        |
| NEO1     | 5,277  | 1.86  | 4.27   | 2.295698925 | 1.12E-13 |
| NEXN     | 2,131  | 1.81  | 8.23   | 4.546961326 | 0        |
| NF2      | 10,998 | 1.89  | 4.41   | 2.333333333 | 0        |
| NFATC3   | 6,725  | 7.32  | 29.63  | 4.047814208 | 0        |
| NFIC     | 3,344  | 7.13  | 16.03  | 2.248246844 | 0        |
| NFIX     | 5,576  | 5.00  | 16.72  | 3.344       | 0        |
| NFKBIL2  | 5,653  | 3.64  | 8.67   | 2.381868132 | 0        |
| NFS1     | 2,678  | 1.29  | 4.69   | 3.635658915 | 1.30E-14 |
| NFYC     | 2,259  | 10.60 | 25.23  | 2.380188679 | 0        |
| NGFR     | 3,387  | 2.77  | 13.66  | 4.931407942 | 0        |
| NGRN     | 2,085  | 6.84  | 21.17  | 3.09502924  | 0        |



|           |       |       |        |             |          |
|-----------|-------|-------|--------|-------------|----------|
| NHP2L1    | 2.3   | 41.64 | 87.66  | 2.10518732  | 0        |
| NIF3L1    | 1,591 | 2.18  | 9.53   | 4.371559633 | 0        |
| NIPA2     | 2.57  | 11.98 | 26.41  | 2.204507513 | 0        |
| NIPSNAP1  | 2,236 | 7.83  | 27.80  | 3.550446999 | 0        |
| NIT1      | 1,362 | 5.66  | 18.74  | 3.310954064 | 0        |
| NIT2      | 0.98  | 5.15  | 13.50  | 2.621359223 | 2.06E-10 |
| NKG7      | 0.826 | 46.59 | 110.85 | 2.379265937 | 0        |
| NKIRAS2   | 3,076 | 7.50  | 18.98  | 2.530666667 | 0        |
| NLE1      | 3,035 | 2.25  | 7.05   | 3.133333333 | 0        |
| NLGN4X    | 5,815 | 0.02  | 3.07   | 153.5       | 0        |
| NLN       | 2,881 | 0.13  | 2.34   | 18          | 0        |
| NLRP3     | 4,461 | 1.07  | 4.04   | 3.775700935 | 0        |
| NLRX1     | 3.94  | 3.01  | 11.44  | 3.800664452 | 0        |
| NME1      | 1,161 | 5.20  | 53.98  | 10.38076923 | 0        |
| NME1-NME2 | 1,052 | 68.09 | 176.80 | 2.596563372 | 0        |
| NME2P1    | 0.693 | 55.11 | 130.55 | 2.368898567 | 0        |
| NME4      | 1,007 | 27.41 | 110.00 | 4.013133893 | 0        |
| NME6      | 1,182 | 1.67  | 6.24   | 3.736526946 | 4.43E-09 |
| NMNAT1    | 1,818 | 0.32  | 3.94   | 12.3125     | 0        |
| NMRAL1    | 1,358 | 5.83  | 19.48  | 3.341337907 | 0        |
| NMT1      | 4,886 | 7.96  | 30.65  | 3.850502513 | 0        |
| NNT       | 5,484 | 6.33  | 13.79  | 2.178515008 | 0        |
| NOC2L     | 3,039 | 9.76  | 25.65  | 2.62807377  | 0        |
| NOC3L     | 3,436 | 0.55  | 2.18   | 3.963636364 | 1.18E-09 |
| NOC4L     | 1,632 | 6.30  | 16.05  | 2.547619048 | 0        |
| NODAL     | 1,665 | 0.47  | 4.33   | 9.212765957 | 1.00E-15 |
| NOL1      | 2,837 | 3.14  | 15.17  | 4.831210191 | 0        |
| NOL11     | 2,454 | 5.92  | 12.32  | 2.081081081 | 6.00E-15 |
| NOL12     | 2.84  | 3.45  | 9.40   | 2.724637681 | 0        |
| NOL14     | 2,918 | 6.54  | 18.33  | 2.802752294 | 0        |
| NOL5A     | 1,937 | 10.93 | 61.01  | 5.581884721 | 0        |
| NOLA1     | 1,303 | 4.25  | 15.45  | 3.635294118 | 0        |
| NOLA2     | 1,231 | 24.19 | 84.99  | 3.513435304 | 0        |
| NOLA2P1   | 0.758 | 11.48 | 25.34  | 2.207317073 | 5.24E-11 |
| NOLA3     | 1,153 | 28.66 | 119.19 | 4.158757851 | 0        |
| NOLC1     | 2,759 | 6.10  | 29.10  | 4.770491803 | 0        |
| NOMO1     | 4,247 | 1.49  | 3.95   | 2.651006711 | 4.95E-13 |

|          |       |       |        |             |          |
|----------|-------|-------|--------|-------------|----------|
| NOMO3    | 4,253 | 0.46  | 1.86   | 4.043478261 | 1.23E-10 |
| NOS2A    | 4,371 | 4.30  | 21.10  | 4.906976744 | 0        |
| NOSIP    | 1,098 | 14.42 | 44.27  | 3.070041609 | 0        |
| NOTCH1   | 9,298 | 3.39  | 7.09   | 2.091445428 | 0        |
| NOTCH3   | 8,071 | 0.10  | 6.08   | 60.8        | 0        |
| NP       | 1,428 | 4.57  | 76.22  | 16.67833698 | 0        |
| N-PAC    | 3.99  | 13.02 | 28.06  | 2.155145929 | 0        |
| NPAL3    | 5,292 | 0.75  | 6.14   | 8.186666667 | 0        |
| NPM3     | 0.865 | 5.15  | 27.07  | 5.25631068  | 0        |
| NPR1     | 4,232 | 8.49  | 29.26  | 3.446407538 | 0        |
| NPTN     | 2,441 | 2.72  | 13.28  | 4.882352941 | 0        |
| NPTX1    | 5,437 | 0.36  | 4.57   | 12.69444444 | 0        |
| NPY      | 1,102 | 8.17  | 37.92  | 4.641370869 | 0        |
| NR2F6    | 1,804 | 0.55  | 3.46   | 6.290909091 | 3.14E-11 |
| NR3C2    | 5,744 | 0.20  | 1.09   | 5.45        | 1.07E-10 |
| NR5A2    | 5,046 | 0.20  | 5.46   | 27.3        | 0        |
| NRD1     | 3,821 | 12.95 | 32.61  | 2.518146718 | 0        |
| NRSN2    | 1,974 | 1.46  | 6.14   | 4.205479452 | 1.00E-15 |
| NSBP1    | 1,865 | 1.54  | 7.90   | 5.12987013  | 0        |
| NSDHL    | 1,563 | 3.42  | 8.30   | 2.426900585 | 3.30E-09 |
| NSFL1C   | 4,843 | 2.49  | 10.18  | 4.088353414 | 0        |
| NSL1     | 1,659 | 2.27  | 8.53   | 3.757709251 | 0        |
| NSMCE1   | 1,062 | 9.60  | 70.67  | 7.361458333 | 0        |
| NT5C     | 0.941 | 13.78 | 29.90  | 2.169811321 | 4.00E-15 |
| NT5C3L   | 1,446 | 6.91  | 17.12  | 2.477568741 | 0        |
| NT5DC2   | 2,432 | 15.66 | 56.67  | 3.618773946 | 0        |
| NTHL1    | 1,067 | 10.67 | 28.34  | 2.656044986 | 0        |
| NTNG1    | 2,932 | 0.27  | 3.39   | 12.55555556 | 0        |
| NTSR1    | 4,131 | 0.03  | 4.16   | 138.6666667 | 0        |
| NUBP2    | 1.35  | 14.22 | 29.83  | 2.097749648 | 0        |
| NUCB1    | 2.25  | 35.53 | 117.52 | 3.307627357 | 0        |
| NUCB2    | 1,586 | 5.99  | 17.16  | 2.864774624 | 0        |
| NUDCD1   | 3,918 | 0.78  | 3.54   | 4.538461538 | 0        |
| NUDCD3   | 7,106 | 1.95  | 7.80   | 4           | 0        |
| NUDCP2   | 0.95  | 3.12  | 12.50  | 4.006410256 | 9.00E-15 |
| NUDT1    | 2,795 | 13.59 | 29.45  | 2.167034584 | 0        |
| NUDT16L1 | 1,313 | 10.25 | 27.71  | 2.703414634 | 0        |

|         |       |        |        |             |          |
|---------|-------|--------|--------|-------------|----------|
| NUDT18  | 2,251 | 2.24   | 5.50   | 2.455357143 | 7.26E-09 |
| NUDT22  | 1,094 | 6.24   | 21.86  | 3.503205128 | 0        |
| NUDT5   | 1,204 | 13.15  | 35.58  | 2.705703422 | 0        |
| NUDT9   | 2,035 | 3.84   | 9.89   | 2.575520833 | 1.20E-14 |
| NUP188  | 5,689 | 5.98   | 12.78  | 2.137123746 | 0        |
| NUP43   | 3,848 | 2.98   | 6.35   | 2.130872483 | 5.78E-13 |
| NUP62   | 3,721 | 11.03  | 31.78  | 2.881233001 | 0        |
| NUP93   | 2.63  | 8.73   | 20.79  | 2.381443299 | 0        |
| NUPL2   | 3,514 | 1.66   | 7.72   | 4.65060241  | 0        |
| NUSAP1  | 2.75  | 5.29   | 23.86  | 4.510396975 | 0        |
| NUTF2   | 0.886 | 20.88  | 91.84  | 4.398467433 | 0        |
| NUTF2P2 | 0.851 | 3.37   | 12.07  | 3.581602374 | 1.07E-11 |
| NXT1    | 1,117 | 3.63   | 15.92  | 4.385674931 | 0        |
| OAF     | 1,862 | 0.91   | 7.60   | 8.351648352 | 0        |
| OAS1    | 2,564 | 0.38   | 4.83   | 12.71052632 | 0        |
| OAS2    | 6,919 | 0.39   | 11.85  | 30.38461538 | 0        |
| OAS3    | 6,627 | 2.11   | 7.88   | 3.734597156 | 0        |
| OAT     | 1,998 | 1.68   | 12.73  | 7.577380952 | 0        |
| OAZ1    | 2,698 | 116.46 | 520.85 | 4.472351022 | 0        |
| OBFC1   | 1.42  | 2.79   | 12.75  | 4.569892473 | 0        |
| OBFC2B  | 1,301 | 6.54   | 19.42  | 2.96941896  | 0        |
| OCC-1   | 1,139 | 1.22   | 8.51   | 6.975409836 | 0        |
| OCEL1   | 1,091 | 1.08   | 5.95   | 5.509259259 | 2.35E-11 |
| ODF2    | 4,331 | 5.48   | 23.75  | 4.333941606 | 0        |
| OGDH    | 9,763 | 1.31   | 9.64   | 7.358778626 | 0        |
| OGFOD1  | 3.02  | 4.98   | 11.91  | 2.391566265 | 0        |
| OGFR    | 2.42  | 12.23  | 30.50  | 2.493867539 | 0        |
| OGG1    | 7,329 | 0.96   | 3.71   | 3.864583333 | 0        |
| OIP5    | 1,569 | 2.20   | 15.09  | 6.859090909 | 0        |
| OLFM4   | 2,819 | 3.16   | 20.89  | 6.610759494 | 0        |
| OLFML2A | 5,964 | 5.84   | 42.21  | 7.227739726 | 0        |
| OPA3    | 3,689 | 0.51   | 2.35   | 4.607843137 | 2.82E-12 |
| OPRL1   | 3,359 | 0.76   | 3.41   | 4.486842105 | 0        |
| OPRS1   | 2,809 | 1.41   | 11.85  | 8.404255319 | 0        |
| ORC1L   | 3,157 | 0.78   | 2.96   | 3.794871795 | 1.23E-11 |
| ORC2L   | 3,121 | 2.31   | 5.83   | 2.523809524 | 2.49E-13 |
| ORMDL2  | 1,244 | 4.93   | 15.85  | 3.215010142 | 0        |

|          |       |       |        |              |          |
|----------|-------|-------|--------|--------------|----------|
| OS9      | 2,942 | 41.60 | 89.13  | 2.142548077  | 0        |
| OSBP2    | 4.34  | 0.28  | 1.63   | 5.821428571  | 3.52E-12 |
| OSBPL10  | 3,923 | 1.79  | 11.46  | 6.402234637  | 0        |
| OSBPL11  | 4,196 | 1.32  | 3.45   | 2.613636364  | 5.27E-11 |
| OSBPL1A  | 5,141 | 2.41  | 9.52   | 3.950207469  | 0        |
| OSTF1    | 0.901 | 8.89  | 36.24  | 4.076490439  | 0        |
| OSTF1P   | 0.751 | 0.92  | 11.33  | 12.31521739  | 0        |
| OSTM1    | 4,467 | 0.33  | 2.81   | 8.515151515  | 0        |
| OXNAD1   | 3,921 | 0.78  | 10.59  | 13.57692308  | 0        |
| OXSR1    | 4,523 | 4.51  | 9.59   | 2.126385809  | 0        |
| P117     | 0.9   | 9.78  | 27.05  | 2.765848671  | 0        |
| P4HA2    | 2,706 | 0.47  | 4.45   | 9.468085106  | 0        |
| P4HB     | 2,422 | 52.82 | 166.11 | 3.144831503  | 0        |
| PA2G4    | 1,978 | 13.31 | 60.69  | 4.559729527  | 0        |
| PA2G4P2  | 1.2   | 0.57  | 5.83   | 10.22807018  | 1.00E-15 |
| PA2G4P4  | 2,757 | 0.75  | 3.85   | 5.133333333  | 0        |
| PABPC4   | 3,048 | 23.01 | 47.09  | 2.046501521  | 0        |
| PABPCP3  | 0.964 | 21.65 | 57.76  | 2.667898383  | 0        |
| PAC SIN1 | 4,234 | 1.12  | 9.41   | 8.401785714  | 0        |
| PAF1     | 2,425 | 13.99 | 36.94  | 2.64045747   | 0        |
| PAFAH1B3 | 1,003 | 13.51 | 27.80  | 2.057735011  | 1.96E-13 |
| PAICS    | 3,306 | 4.82  | 28.69  | 5.952282158  | 0        |
| PAK1IP1  | 1,497 | 0.60  | 6.36   | 10.6         | 0        |
| PAK4     | 4,366 | 0.70  | 3.80   | 5.428571429  | 0        |
| PALB2    | 4,007 | 1.01  | 2.74   | 2.712871287  | 1.72E-09 |
| PALM     | 2,874 | 33.19 | 91.18  | 2.747213016  | 0        |
| PANK4    | 2,642 | 1.50  | 4.75   | 3.166666667  | 1.48E-12 |
| PAPOLA   | 4,803 | 12.30 | 30.90  | 2.512195122  | 0        |
| PAPSS1   | 2,542 | 3.42  | 10.83  | 3.166666667  | 0        |
| PAQR4    | 2,446 | 1.13  | 7.50   | 6.637168142  | 0        |
| PAQR8    | 4,637 | 0.06  | 2.87   | 47.833333333 | 0        |
| PARK7    | 0.879 | 63.59 | 162.53 | 2.555905017  | 0        |
| PARN     | 2,992 | 3.57  | 10.02  | 2.806722689  | 0        |
| PARP1    | 3,861 | 33.24 | 149.86 | 4.508423586  | 0        |
| PARP10   | 3.47  | 7.15  | 25.56  | 3.574825175  | 0        |
| PARP16   | 2,534 | 1.37  | 5.95   | 4.343065693  | 0        |
| PARP1P1  | 3.53  | 2.81  | 14.73  | 5.241992883  | 0        |

|          |       |        |        |             |          |
|----------|-------|--------|--------|-------------|----------|
| PARP9    | 3,233 | 3.76   | 10.92  | 2.904255319 | 0        |
| PATZ1    | 6,396 | 5.62   | 15.53  | 2.763345196 | 0        |
| PAXIP1   | 7,424 | 0.46   | 1.97   | 4.282608696 | 0        |
| PC-3     | 0.68  | 7.71   | 21.30  | 2.762645914 | 5.84E-12 |
| PCBD1    | 1,006 | 0.89   | 8.71   | 9.786516854 | 0        |
| PCBD2    | 2,439 | 282.94 | 920.31 | 3.25266841  | 0        |
| PCBP2    | 3,601 | 166.20 | 333.68 | 2.007701564 | 0        |
| PCCA     | 2,494 | 1.03   | 9.66   | 9.378640777 | 0        |
| PCCB     | 1,827 | 8.07   | 22.68  | 2.810408922 | 0        |
| PCDH12   | 5,182 | 1.80   | 92.88  | 51.6        | 0        |
| PCDH9    | 6,222 | 1.81   | 17.03  | 9.408839779 | 0        |
| PCDHGA1  | 7,074 | 0.20   | 1.93   | 9.65        | 0        |
| PCDHGA10 | 7.17  | 0.33   | 1.96   | 5.939393939 | 0        |
| PCDHGA11 | 9,609 | 0.49   | 1.58   | 3.224489796 | 3.00E-15 |
| PCDHGA12 | 7,237 | 0.60   | 3.99   | 6.65        | 0        |
| PCDHGA2  | 7,262 | 0.19   | 1.78   | 9.368421053 | 0        |
| PCDHGA3  | 7,095 | 0.20   | 1.92   | 9.6         | 0        |
| PCDHGA4  | 7,131 | 0.20   | 1.91   | 9.55        | 0        |
| PCDHGA5  | 7,044 | 0.25   | 2.12   | 8.48        | 0        |
| PCDHGA6  | 7,062 | 0.71   | 2.23   | 3.14084507  | 2.00E-15 |
| PCDHGA7  | 7,326 | 0.36   | 1.95   | 5.416666667 | 0        |
| PCDHGA8  | 8,093 | 0.23   | 1.50   | 6.52173913  | 0        |
| PCDHGA9  | 7,092 | 0.30   | 1.90   | 6.333333333 | 0        |
| PCDHGB1  | 7,023 | 0.24   | 2.14   | 8.916666667 | 0        |
| PCDHGB2  | 7,038 | 0.92   | 4.09   | 4.445652174 | 0        |
| PCDHGB3  | 7,041 | 0.49   | 2.23   | 4.551020408 | 0        |
| PCDHGB4  | 6.99  | 0.41   | 2.06   | 5.024390244 | 0        |
| PCDHGB5  | 7,035 | 0.32   | 1.93   | 6.03125     | 0        |
| PCDHGB6  | 7,062 | 0.25   | 2.10   | 8.4         | 0        |
| PCDHGB7  | 7,311 | 0.39   | 2.04   | 5.230769231 | 0        |
| PCDHGC3  | 7,435 | 2.29   | 14.52  | 6.340611354 | 0        |
| PCDHGC4  | 7,239 | 0.31   | 1.87   | 6.032258065 | 0        |
| PCDHGC5  | 7,278 | 0.34   | 1.84   | 5.411764706 | 0        |
| PCGF2    | 2,604 | 3.49   | 23.19  | 6.64469914  | 0        |
| PCID2    | 1,786 | 3.77   | 16.46  | 4.366047745 | 0        |
| PCMT1    | 1,599 | 6.25   | 18.23  | 2.9168      | 0        |
| PCNA     | 1,558 | 16.19  | 57.74  | 3.566399012 | 0        |

|         |        |       |        |             |          |
|---------|--------|-------|--------|-------------|----------|
| PCYOX1  | 4,225  | 0.63  | 3.37   | 5.349206349 | 0        |
| PCYOX1L | 2,506  | 3.59  | 8.87   | 2.470752089 | 3.00E-15 |
| PCYT2   | 1.85   | 1.92  | 12.06  | 6.28125     | 0        |
| PDAP1   | 5,011  | 7.17  | 19.24  | 2.683403068 | 0        |
| PDCD11  | 6,416  | 2.48  | 11.58  | 4.669354839 | 0        |
| PDCD2   | 2,753  | 7.84  | 15.69  | 2.00127551  | 0        |
| PDCD2L  | 1,158  | 0.94  | 7.64   | 8.127659574 | 0        |
| PDCD5   | 0.567  | 8.38  | 27.48  | 3.279236277 | 1.00E-15 |
| PDCD6   | 1,132  | 12.15 | 73.37  | 6.038683128 | 0        |
| PDCD7   | 2,851  | 3.44  | 8.89   | 2.584302326 | 0        |
| PDCL3   | 1,066  | 3.99  | 10.90  | 2.731829574 | 1.19E-09 |
| PDDC1   | 4,363  | 2.70  | 9.66   | 3.577777778 | 0        |
| PDE4DIP | 12,771 | 0.49  | 1.83   | 3.734693878 | 0        |
| PDE6D   | 1,118  | 2.21  | 33.23  | 15.0361991  | 0        |
| PDE6G   | 1,221  | 1.70  | 7.04   | 4.141176471 | 1.96E-11 |
| PDF     | 1,158  | 3.50  | 12.48  | 3.565714286 | 1.00E-15 |
| PDHB    | 1,501  | 11.34 | 31.65  | 2.791005291 | 0        |
| PDIA3   | 3,054  | 34.73 | 106.96 | 3.079758134 | 0        |
| PDIA3P  | 2,099  | 23.71 | 77.33  | 3.261493041 | 0        |
| PDIA4   | 6,283  | 3.91  | 28.91  | 7.393861893 | 0        |
| PDIA5   | 1,679  | 4.24  | 12.14  | 2.863207547 | 0        |
| PDIA6   | 2,552  | 32.14 | 119.45 | 3.716552582 | 0        |
| PDK2    | 2.29   | 2.51  | 13.72  | 5.466135458 | 0        |
| PDLIM2  | 6,143  | 1.93  | 8.76   | 4.538860104 | 0        |
| PDLIM7  | 2,074  | 2.10  | 10.77  | 5.128571429 | 0        |
| PDSS2   | 3,526  | 0.53  | 2.08   | 3.924528302 | 7.50E-10 |
| PDXP    | 2,005  | 0.84  | 20.25  | 24.10714286 | 0        |
| PDZD11  | 1,663  | 3.51  | 15.09  | 4.299145299 | 0        |
| PEA15   | 2,469  | 4.28  | 22.01  | 5.142523364 | 0        |
| PEBP1   | 2,306  | 72.34 | 210.39 | 2.908349461 | 0        |
| PECI    | 1,617  | 2.44  | 16.21  | 6.643442623 | 0        |
| PELP1   | 3,393  | 9.13  | 24.05  | 2.634173056 | 0        |
| PEMT    | 1,318  | 6.16  | 45.92  | 7.454545455 | 0        |
| PEO1    | 3,602  | 1.38  | 7.81   | 5.65942029  | 0        |
| PEPD    | 1,889  | 8.85  | 24.79  | 2.801129944 | 0        |
| PES1    | 2,262  | 13.60 | 35.38  | 2.601470588 | 0        |
| PET112L | 2,011  | 1.67  | 8.71   | 5.215568862 | 0        |

|         |       |        |         |             |          |
|---------|-------|--------|---------|-------------|----------|
| PEX10   | 2.25  | 5.32   | 16.45   | 3.092105263 | 0        |
| PEX14   | 1,908 | 4.15   | 13.33   | 3.212048193 | 0        |
| PEX19   | 3,656 | 3.73   | 13.99   | 3.750670241 | 0        |
| PEX3    | 1,967 | 0.51   | 4.24    | 8.31372549  | 0        |
| PEX5    | 3,169 | 3.12   | 10.15   | 3.253205128 | 0        |
| PEX6    | 3.27  | 6.81   | 33.34   | 4.895741557 | 0        |
| PFAS    | 5,338 | 3.54   | 8.89    | 2.511299435 | 0        |
| PFDN2   | 0.642 | 21.88  | 59.83   | 2.734460695 | 0        |
| PFKM    | 2,747 | 4.32   | 10.18   | 2.356481481 | 0        |
| PFKP    | 2,616 | 12.11  | 51.55   | 4.256812552 | 0        |
| PFN1    | 0.915 | 225.98 | 1375.96 | 6.088857421 | 0        |
| PFN2    | 3,467 | 0.09   | 5.49    | 61          | 0        |
| PGAM1   | 1.72  | 2.76   | 9.06    | 3.282608696 | 1.00E-15 |
| PGAM5   | 1,151 | 2.92   | 20.01   | 6.852739726 | 0        |
| PGD     | 1,937 | 23.09  | 50.53   | 2.188393244 | 0        |
| PGK1    | 2.32  | 37.01  | 84.71   | 2.288840854 | 0        |
| PGK1P2  | 1,527 | 3.44   | 10.15   | 2.950581395 | 5.90E-14 |
| PGLS    | 1,034 | 34.06  | 69.06   | 2.027598356 | 0        |
| PGLYRP1 | 0.69  | 3.30   | 12.58   | 3.812121212 | 1.22E-10 |
| PGM1    | 2,472 | 1.60   | 7.67    | 4.79375     | 0        |
| PGM2    | 3,177 | 4.20   | 12.28   | 2.923809524 | 0        |
| PGM5    | 3,338 | 1.13   | 7.88    | 6.973451327 | 0        |
| PGRMC2  | 1,853 | 5.08   | 14.96   | 2.94488189  | 0        |
| PHEX    | 2,861 | 0.20   | 2.47    | 12.35       | 0        |
| PHF13   | 3,644 | 0.84   | 3.03    | 3.607142857 | 4.82E-13 |
| PHF14   | 9.16  | 1.00   | 4.14    | 4.14        | 0        |
| PHF15   | 6,463 | 7.41   | 23.45   | 3.164642375 | 0        |
| PHF19   | 4,658 | 3.76   | 14.94   | 3.973404255 | 0        |
| PHF23   | 1,971 | 4.32   | 19.23   | 4.451388889 | 0        |
| PHGDHL1 | 2,525 | 7.32   | 15.24   | 2.081967213 | 0        |
| PHLDA3  | 1,516 | 0.13   | 8.84    | 68          | 0        |
| PHLDB1  | 5,695 | 0.62   | 2.35    | 3.790322581 | 1.00E-15 |
| PHPT1   | 0.906 | 8.51   | 51.69   | 6.074030552 | 0        |
| PIAS4   | 1,737 | 1.99   | 10.66   | 5.35678392  | 0        |
| PIGK    | 1,887 | 0.94   | 5.49    | 5.840425532 | 0        |
| PIGN    | 5,208 | 1.29   | 4.36    | 3.379844961 | 0        |
| PIGP    | 1,174 | 1.77   | 6.31    | 3.564971751 | 1.03E-08 |

|          |       |       |        |             |          |
|----------|-------|-------|--------|-------------|----------|
| PIGU     | 1,832 | 1.72  | 13.06  | 7.593023256 | 0        |
| PIGV     | 2,365 | 3.14  | 6.45   | 2.054140127 | 5.43E-08 |
| PIGW     | 2,255 | 0.35  | 2.69   | 7.685714286 | 6.76E-12 |
| PIK3AP1  | 4,811 | 3.76  | 50.71  | 13.48670213 | 0        |
| PIK3CD   | 5,203 | 30.00 | 67.09  | 2.236333333 | 0        |
| PIK3R2   | 3,938 | 0.58  | 10.76  | 18.55172414 | 0        |
| PIK3R3   | 5,609 | 0.36  | 1.64   | 4.555555556 | 2.85E-13 |
| PIM1     | 2,645 | 9.62  | 72.61  | 7.547817048 | 0        |
| PIN1     | 0.997 | 21.14 | 51.54  | 2.438032167 | 0        |
| PIN4     | 1,071 | 2.31  | 9.12   | 3.948051948 | 3.31E-12 |
| PINX1    | 1,545 | 2.12  | 8.07   | 3.806603774 | 6.00E-15 |
| PIP5K1C  | 5,047 | 3.32  | 12.33  | 3.713855422 | 0        |
| PIP5K2B  | 4,768 | 8.10  | 23.28  | 2.874074074 | 0        |
| PITPNB   | 2,925 | 8.02  | 18.31  | 2.283042394 | 0        |
| PITPNM1  | 4,189 | 2.20  | 5.17   | 2.35        | 1.00E-13 |
| PJA1     | 6,445 | 0.36  | 2.60   | 7.222222222 | 0        |
| PKM2     | 3,585 | 55.00 | 280.48 | 5.099636364 | 0        |
| PKMYT1   | 2,495 | 2.50  | 6.65   | 2.66        | 5.59E-13 |
| PKN3     | 3,377 | 5.92  | 16.89  | 2.853040541 | 0        |
| PKNOX1   | 6,673 | 1.26  | 2.80   | 2.222222222 | 8.30E-11 |
| PKP4     | 4,591 | 1.55  | 7.80   | 5.032258065 | 0        |
| PLA2G12A | 1,659 | 0.47  | 3.25   | 6.914893617 | 6.98E-11 |
| PLAUR    | 2,001 | 0.74  | 11.11  | 15.01351351 | 0        |
| PLCB3    | 3,705 | 1.52  | 6.56   | 4.315789474 | 0        |
| PLCL2    | 3.94  | 5.72  | 18.86  | 3.297202797 | 0        |
| PLD3     | 2,408 | 12.58 | 34.81  | 2.76709062  | 0        |
| PLD4     | 1,934 | 3.48  | 27.48  | 7.896551724 | 0        |
| PLEKHA2  | 1,437 | 3.99  | 17.72  | 4.441102757 | 0        |
| PLEKHG2  | 4,706 | 3.74  | 8.93   | 2.387700535 | 0        |
| PLEKHG3  | 4.4   | 1.73  | 4.83   | 2.791907514 | 0        |
| PLEKHJ1  | 1,215 | 10.91 | 39.31  | 3.603116407 | 0        |
| PLEKHO1  | 1,615 | 50.79 | 131.91 | 2.597164796 | 0        |
| PLK1     | 2,169 | 1.78  | 19.73  | 11.08426966 | 0        |
| PLOD1    | 3,004 | 0.76  | 13.24  | 17.42105263 | 0        |
| PLOD3    | 5,954 | 1.41  | 7.26   | 5.14893617  | 0        |
| PLP2     | 0.929 | 44.41 | 106.72 | 2.403062373 | 0        |
| PLSCR1   | 3,011 | 14.33 | 34.35  | 2.397069086 | 0        |



|         |       |       |        |             |          |
|---------|-------|-------|--------|-------------|----------|
| PLVAP   | 2,276 | 23.69 | 510.56 | 21.55170958 | 0        |
| PLXND1  | 8,591 | 36.30 | 104.12 | 2.868319559 | 0        |
| PMVK    | 1.28  | 5.10  | 37.65  | 7.382352941 | 0        |
| PNKD    | 5,362 | 1.44  | 5.96   | 4.138888889 | 0        |
| PNMA1   | 2,643 | 1.83  | 6.63   | 3.62295082  | 0        |
| PNPLA4  | 2,815 | 0.60  | 2.60   | 4.333333333 | 4.71E-10 |
| PNPO    | 2,397 | 0.66  | 12.90  | 19.54545455 | 0        |
| PODNL1  | 2,164 | 0.41  | 3.00   | 7.317073171 | 1.73E-12 |
| POFUT1  | 6,135 | 1.62  | 6.33   | 3.907407407 | 0        |
| POGK    | 3,852 | 2.91  | 9.10   | 3.127147766 | 0        |
| POLA1   | 5,437 | 1.09  | 4.57   | 4.19266055  | 0        |
| POLA2   | 2,474 | 3.00  | 9.77   | 3.256666667 | 0        |
| POLD1   | 3,443 | 3.05  | 13.83  | 4.53442623  | 0        |
| POLD2   | 3,168 | 5.62  | 31.59  | 5.620996441 | 0        |
| POLD3   | 3.43  | 1.01  | 6.87   | 6.801980198 | 0        |
| POLD4   | 0.918 | 49.58 | 115.51 | 2.329770069 | 0        |
| POLDIP2 | 2,683 | 11.62 | 31.90  | 2.745266781 | 0        |
| POLDIP3 | 3,435 | 14.17 | 31.00  | 2.187720536 | 0        |
| POLE4   | 0.696 | 8.39  | 28.32  | 3.375446961 | 0        |
| POLH    | 3,464 | 4.26  | 16.95  | 3.978873239 | 0        |
| POLM    | 5,147 | 1.88  | 4.79   | 2.54787234  | 0        |
| POLR1A  | 5,398 | 1.96  | 6.20   | 3.163265306 | 0        |
| POLR1B  | 5,969 | 0.50  | 4.28   | 8.56        | 0        |
| POLR2C  | 1,804 | 18.26 | 50.29  | 2.754107338 | 0        |
| POLR2D  | 1,907 | 5.09  | 13.91  | 2.73280943  | 0        |
| POLR2E  | 1,226 | 25.90 | 77.99  | 3.011196911 | 0        |
| POLR2F  | 0.545 | 8.53  | 52.55  | 6.160609613 | 0        |
| POLR2G  | 0.827 | 21.06 | 73.34  | 3.482431149 | 0        |
| POLR2H  | 0.821 | 5.55  | 32.42  | 5.841441441 | 0        |
| POLR2I  | 0.872 | 8.17  | 37.38  | 4.575275398 | 0        |
| POLR2K  | 0.971 | 10.39 | 21.86  | 2.103946102 | 5.01E-11 |
| POLR2L  | 0.876 | 15.02 | 129.91 | 8.649134487 | 0        |
| POLR3A  | 5,609 | 1.64  | 3.71   | 2.262195122 | 2.68E-12 |
| POLR3D  | 1,929 | 4.46  | 18.34  | 4.112107623 | 0        |
| POLR3GL | 1,165 | 9.17  | 23.00  | 2.508178844 | 0        |
| POLR3K  | 0.796 | 2.49  | 31.85  | 12.79116466 | 0        |
| POLRMT  | 3,773 | 3.44  | 11.81  | 3.433139535 | 0        |

|          |        |        |        |             |          |
|----------|--------|--------|--------|-------------|----------|
| POMGNT1  | 2,711  | 4.23   | 20.85  | 4.929078014 | 0        |
| POP1     | 3,244  | 0.19   | 2.29   | 12.05263158 | 0        |
| POP4     | 1,108  | 5.00   | 16.20  | 3.24        | 0        |
| POP5     | 0.833  | 5.11   | 32.77  | 6.412915851 | 0        |
| POP7     | 1,668  | 3.68   | 8.44   | 2.293478261 | 5.35E-09 |
| POT1     | 5,262  | 1.23   | 2.69   | 2.18699187  | 1.70E-08 |
| POU2AF1  | 3,498  | 13.10  | 66.42  | 5.070229008 | 0        |
| POU2F2   | 2,011  | 0.93   | 9.20   | 9.892473118 | 0        |
| PPARA    | 13,437 | 0.42   | 3.96   | 9.428571429 | 0        |
| PPAT     | 3,746  | 1.22   | 3.31   | 2.713114754 | 2.69E-10 |
| PPFIA4   | 5,045  | 0.34   | 1.77   | 5.205882353 | 4.80E-14 |
| PPIB     | 1,028  | 100.86 | 378.32 | 3.7509419   | 0        |
| PPID     | 1,834  | 4.59   | 11.94  | 2.60130719  | 0        |
| PPIE     | 1,619  | 9.41   | 20.03  | 2.12858661  | 0        |
| PPIF     | 2,201  | 4.99   | 13.66  | 2.73747495  | 0        |
| PPIL1    | 1,706  | 1.10   | 11.11  | 10.1        | 0        |
| PPM1F    | 5,151  | 18.86  | 42.23  | 2.239130435 | 0        |
| PPM1G    | 2.36   | 30.10  | 70.89  | 2.355149502 | 0        |
| PPM1K    | 2,098  | 2.45   | 6.82   | 2.783673469 | 6.55E-12 |
| PPM1M    | 2,429  | 4.68   | 12.00  | 2.564102564 | 0        |
| PPME1    | 2,453  | 6.66   | 15.70  | 2.357357357 | 0        |
| PPP1CA   | 1,635  | 35.94  | 139.36 | 3.877573734 | 0        |
| PPP1R13B | 4,833  | 0.82   | 6.53   | 7.963414634 | 0        |
| PPP1R13L | 3,093  | 1.02   | 4.41   | 4.323529412 | 0        |
| PPP1R14B | 0.987  | 11.83  | 47.20  | 3.989856298 | 0        |
| PPP1R7   | 1,293  | 9.71   | 41.30  | 4.253347065 | 0        |
| PPP1R9B  | 4,046  | 11.37  | 49.01  | 4.310466139 | 0        |
| PPP2R2C  | 4,186  | 0.24   | 1.39   | 5.791666667 | 4.20E-10 |
| PPP2R3B  | 2,786  | 2.77   | 7.62   | 2.750902527 | 0        |
| PPP2R3C  | 1,834  | 3.08   | 7.16   | 2.324675325 | 1.60E-08 |
| PPP2R4   | 3,021  | 11.79  | 33.10  | 2.807463953 | 0        |
| PPP2R5D  | 3,449  | 4.76   | 23.37  | 4.909663866 | 0        |
| PPP3CA   | 4,401  | 5.62   | 15.33  | 2.727758007 | 0        |
| PPP3CB   | 3,068  | 3.84   | 12.02  | 3.130208333 | 0        |
| PPP5C    | 2,062  | 5.81   | 32.35  | 5.567986231 | 0        |
| PPRC1    | 5,338  | 1.59   | 7.70   | 4.842767296 | 0        |
| PPT1     | 2.33   | 9.98   | 42.69  | 4.27755511  | 0        |

|         |        |       |        |             |          |
|---------|--------|-------|--------|-------------|----------|
| PQLC2   | 2,659  | 0.67  | 3.10   | 4.626865672 | 7.22E-12 |
| PRAF2   | 1,263  | 10.89 | 26.01  | 2.388429752 | 0        |
| PRAME   | 3,143  | 0.22  | 5.18   | 23.54545455 | 0        |
| PRCP    | 2,628  | 2.41  | 8.11   | 3.365145228 | 0        |
| PRDX1   | 1,646  | 33.60 | 368.31 | 10.96160714 | 0        |
| PRDX2   | 1,465  | 8.03  | 25.36  | 3.158156912 | 0        |
| PRDX3   | 1,812  | 4.04  | 30.87  | 7.641089109 | 0        |
| PRDX4   | 0.921  | 6.76  | 26.98  | 3.99112426  | 0        |
| PRDX5   | 0.884  | 29.10 | 93.57  | 3.215463918 | 0        |
| PREB    | 2,165  | 2.47  | 21.75  | 8.805668016 | 0        |
| PRELID1 | 1,191  | 9.97  | 43.36  | 4.349047141 | 0        |
| PREP    | 2,849  | 4.76  | 12.27  | 2.577731092 | 0        |
| PREPL   | 6,273  | 0.36  | 3.05   | 8.472222222 | 0        |
| PREX1   | 7,695  | 39.33 | 84.37  | 2.145181795 | 0        |
| PRIM1   | 1,462  | 0.74  | 5.25   | 7.094594595 | 6.00E-15 |
| PRKACA  | 2,727  | 7.29  | 31.91  | 4.377229081 | 0        |
| PRKACB  | 5,609  | 2.08  | 5.80   | 2.788461538 | 0        |
| PRKAR1B | 3,857  | 0.51  | 2.30   | 4.509803922 | 6.70E-13 |
| PRKCA   | 8.77   | 3.31  | 21.35  | 6.450151057 | 0        |
| PRKCI   | 4,874  | 0.73  | 2.19   | 3           | 5.93E-10 |
| PRKD2   | 3,246  | 31.15 | 69.30  | 2.224719101 | 0        |
| PRKDC   | 13,508 | 4.64  | 11.03  | 2.377155172 | 0        |
| PRMT1   | 1,517  | 21.06 | 111.44 | 5.291547958 | 0        |
| PRMT2   | 2,596  | 9.87  | 23.30  | 2.360688956 | 0        |
| PRMT5   | 2,671  | 2.41  | 25.89  | 10.74273859 | 0        |
| PRMT6   | 2,506  | 3.48  | 9.18   | 2.637931034 | 0        |
| PRMT7   | 2.39   | 4.14  | 20.23  | 4.88647343  | 0        |
| PROSC   | 2,995  | 1.75  | 11.34  | 6.48        | 0        |
| PRPF19  | 2,153  | 31.85 | 83.33  | 2.616326531 | 0        |
| PRPF31  | 2,128  | 15.25 | 33.45  | 2.193442623 | 0        |
| PRPF40B | 3,801  | 0.81  | 5.43   | 6.703703704 | 0        |
| PRPF6   | 3,101  | 24.37 | 58.30  | 2.392285597 | 0        |
| PRPS2   | 2,702  | 0.92  | 3.65   | 3.967391304 | 2.09E-12 |
| PRPSAP1 | 1,728  | 3.84  | 19.31  | 5.028645833 | 0        |
| PRPSAP2 | 1.89   | 1.99  | 7.27   | 3.653266332 | 1.00E-15 |
| PRR11   | 1,317  | 2.40  | 11.38  | 4.741666667 | 0        |
| PRR12   | 7,396  | 2.49  | 9.16   | 3.678714859 | 0        |

|         |       |       |        |             |          |
|---------|-------|-------|--------|-------------|----------|
| PRR13   | 1,554 | 22.35 | 74.91  | 3.351677852 | 0        |
| PRRC1   | 4,644 | 2.32  | 7.69   | 3.314655172 | 0        |
| PRSS21  | 1,565 | 10.75 | 23.52  | 2.187906977 | 0        |
| PRSSL1  | 1,089 | 8.27  | 47.34  | 5.724304716 | 0        |
| PRTN3   | 1,001 | 5.93  | 20.45  | 3.44856661  | 0        |
| PRUNE   | 2,977 | 2.43  | 9.06   | 3.728395062 | 0        |
| PSCD2   | 1,534 | 13.74 | 31.90  | 2.321688501 | 0        |
| PSD4    | 5,039 | 3.64  | 19.49  | 5.354395604 | 0        |
| PSENE   | 0.665 | 9.97  | 66.12  | 6.631895687 | 0        |
| PSKH1   | 3,441 | 4.83  | 14.17  | 2.933747412 | 0        |
| PSMA4   | 1,174 | 23.93 | 53.96  | 2.254910155 | 0        |
| PSMA5   | 1,685 | 16.38 | 50.77  | 3.0995116   | 0        |
| PSMA6   | 1,466 | 89.22 | 208.85 | 2.34084286  | 0        |
| PSMA7   | 1,535 | 23.14 | 113.00 | 4.883318928 | 0        |
| PSMB10  | 0.979 | 35.47 | 107.21 | 3.022554271 | 0        |
| PSMB2   | 0.845 | 35.83 | 75.37  | 2.103544516 | 0        |
| PSMB3   | 1,597 | 20.57 | 89.04  | 4.328633933 | 0        |
| PSMB5   | 1,049 | 12.17 | 42.64  | 3.503697617 | 0        |
| PSMB6   | 0.826 | 25.51 | 74.55  | 2.922383379 | 0        |
| PSMC1P  | 1,558 | 4.07  | 9.95   | 2.444717445 | 7.11E-11 |
| PSMC5   | 1.54  | 33.02 | 83.53  | 2.529678982 | 0        |
| PSMD1   | 3,227 | 7.63  | 19.78  | 2.592398427 | 0        |
| PSMD10  | 2,555 | 3.29  | 14.05  | 4.270516717 | 0        |
| PSMD14  | 1,261 | 5.25  | 20.38  | 3.881904762 | 0        |
| PSMD3   | 2,428 | 27.67 | 77.92  | 2.816046259 | 0        |
| PSMD4P2 | 3,406 | 3.95  | 10.37  | 2.625316456 | 0        |
| PSMD8   | 1,508 | 20.07 | 70.49  | 3.512207275 | 0        |
| PSMD9   | 2,343 | 10.18 | 21.89  | 2.150294695 | 0        |
| PSME2   | 0.829 | 14.32 | 73.36  | 5.122905028 | 0        |
| PSME2P  | 0.78  | 3.17  | 16.74  | 5.280757098 | 0        |
| PSME3   | 3,281 | 12.69 | 39.82  | 3.137903861 | 0        |
| PSMF1   | 6,152 | 10.17 | 25.14  | 2.471976401 | 0        |
| PSPH    | 4,236 | 0.88  | 3.54   | 4.022727273 | 0        |
| PSRC1   | 3,168 | 0.44  | 3.19   | 7.25        | 0        |
| PSTPIP2 | 2.9   | 8.87  | 18.77  | 2.116121759 | 0        |
| PTBP1   | 4,436 | 31.82 | 87.21  | 2.740729101 | 0        |
| PTDSS1  | 2,504 | 20.82 | 45.75  | 2.19740634  | 0        |

|         |       |        |        |             |          |
|---------|-------|--------|--------|-------------|----------|
| PTGDR   | 2,942 | 2.72   | 6.38   | 2.345588235 | 5.09E-12 |
| PTGES2  | 3,167 | 3.84   | 11.94  | 3.109375    | 0        |
| PTGES3  | 1.47  | 24.70  | 59.67  | 2.415789474 | 0        |
| PTGFRN  | 6.16  | 0.04   | 1.56   | 39          | 0        |
| PTGIR   | 2,086 | 3.18   | 21.04  | 6.616352201 | 0        |
| PTGIS   | 5,603 | 0.02   | 6.45   | 322.5       | 0        |
| PTGS1   | 5,269 | 0.76   | 2.09   | 2.75        | 1.72E-09 |
| PTMA    | 3,376 | 114.94 | 508.22 | 4.421611275 | 0        |
| PTMAP7  | 1.06  | 35.10  | 108.79 | 3.099430199 | 0        |
| PTOV1   | 3,404 | 22.30  | 52.18  | 2.339910314 | 0        |
| PTP4A3  | 3,834 | 33.21  | 80.22  | 2.415537489 | 0        |
| PTPLAD1 | 1,864 | 4.04   | 23.21  | 5.745049505 | 0        |
| PTPLAD2 | 4,081 | 2.43   | 5.74   | 2.362139918 | 7.00E-15 |
| PTPLB   | 4,261 | 2.81   | 8.22   | 2.925266904 | 0        |
| PTPN3   | 4,084 | 0.73   | 3.54   | 4.849315068 | 0        |
| PTPN7   | 3,516 | 3.49   | 28.92  | 8.286532951 | 0        |
| PTPN9   | 3,938 | 2.86   | 13.32  | 4.657342657 | 0        |
| PTPRA   | 3,942 | 9.01   | 27.75  | 3.07991121  | 0        |
| PTPRCAP | 0.907 | 101.33 | 430.00 | 4.243560643 | 0        |
| PTPRG   | 5,771 | 1.51   | 3.66   | 2.42384106  | 5.40E-14 |
| PTRH1   | 0.815 | 1.46   | 7.34   | 5.02739726  | 1.49E-09 |
| PTTG1   | 0.712 | 4.30   | 38.33  | 8.913953488 | 0        |
| PUS1    | 2,563 | 5.56   | 24.25  | 4.361510791 | 0        |
| PVRL1   | 6,114 | 0.10   | 4.08   | 40.8        | 0        |
| PWP2    | 3.26  | 2.55   | 11.03  | 4.325490196 | 0        |
| PXMP2   | 0.957 | 4.76   | 24.47  | 5.140756303 | 0        |
| PXMP4   | 2,987 | 0.33   | 2.51   | 7.606060606 | 1.90E-14 |
| PYCARD  | 1,021 | 12.69  | 59.32  | 4.674546887 | 0        |
| PYCR1   | 2,702 | 1.98   | 20.04  | 10.12121212 | 0        |
| PYCR2   | 1,933 | 23.08  | 116.92 | 5.065857886 | 0        |
| PYCRL   | 2,332 | 0.55   | 5.86   | 10.65454545 | 0        |
| PYGB    | 4,131 | 3.64   | 9.69   | 2.662087912 | 0        |
| PYGL    | 2.83  | 1.30   | 4.67   | 3.592307692 | 8.00E-15 |
| PYGM    | 3,447 | 0.60   | 6.53   | 10.88333333 | 0        |
| PYGO2   | 3.18  | 6.51   | 24.11  | 3.703533026 | 0        |
| QDPR    | 1,502 | 3.49   | 16.15  | 4.627507163 | 0        |
| QSCN6   | 4,356 | 4.38   | 19.16  | 4.374429224 | 0        |

|         |       |       |        |             |          |
|---------|-------|-------|--------|-------------|----------|
| R3HCC1  | 1,625 | 8.40  | 23.84  | 2.838095238 | 0        |
| R3HDM1  | 4,647 | 3.11  | 10.72  | 3.446945338 | 0        |
| RAB10   | 3,495 | 6.31  | 18.58  | 2.944532488 | 0        |
| RAB11A  | 2,393 | 19.55 | 40.50  | 2.071611253 | 0        |
| RAB11B  | 1,981 | 35.96 | 74.65  | 2.075917686 | 0        |
| RAB15   | 3,312 | 23.63 | 58.60  | 2.479898434 | 0        |
| RAB1B   | 1,906 | 26.27 | 84.41  | 3.213170917 | 0        |
| RAB1C   | 0.606 | 11.27 | 29.19  | 2.590062112 | 3.79E-13 |
| RAB20   | 1,509 | 1.24  | 10.38  | 8.370967742 | 0        |
| RAB31   | 3,952 | 1.13  | 2.77   | 2.451327434 | 4.77E-08 |
| RAB37   | 4,214 | 4.53  | 9.80   | 2.163355408 | 0        |
| RAB40C  | 2,612 | 2.38  | 7.61   | 3.197478992 | 0        |
| RAB4B   | 1,351 | 19.26 | 50.91  | 2.643302181 | 0        |
| RAB5B   | 3,722 | 21.21 | 55.58  | 2.620462046 | 0        |
| RAB8A   | 2,177 | 15.64 | 54.68  | 3.496163683 | 0        |
| RABEPK  | 1,437 | 2.96  | 13.07  | 4.415540541 | 0        |
| RABGGTA | 2,368 | 4.30  | 10.74  | 2.497674419 | 0        |
| RABIF   | 2.43  | 0.65  | 4.61   | 7.092307692 | 0        |
| RABL2A  | 2,312 | 2.35  | 5.58   | 2.374468085 | 4.63E-09 |
| RABL4   | 1,021 | 1.55  | 11.88  | 7.664516129 | 0        |
| RAC2    | 1,468 | 25.48 | 135.65 | 5.323783359 | 0        |
| RACGAP1 | 3,229 | 1.62  | 12.47  | 7.697530864 | 0        |
| RAD23A  | 2,035 | 30.29 | 65.91  | 2.175965665 | 0        |
| RAD51   | 2,407 | 0.45  | 3.88   | 8.622222222 | 0        |
| RAD51C  | 1,686 | 0.76  | 7.34   | 9.657894737 | 0        |
| RAD51L3 | 2,384 | 0.87  | 3.60   | 4.137931034 | 3.08E-11 |
| RAD54L  | 3,096 | 0.90  | 4.00   | 4.444444444 | 0        |
| RAG1    | 6,571 | 13.08 | 34.66  | 2.649847095 | 0        |
| RAG1AP1 | 1,298 | 5.56  | 28.42  | 5.111510791 | 0        |
| RAG2    | 2,388 | 3.56  | 7.72   | 2.168539326 | 2.13E-10 |
| RAI14   | 4,901 | 2.63  | 16.98  | 6.456273764 | 0        |
| RALA    | 5,592 | 1.43  | 4.22   | 2.951048951 | 0        |
| RALB    | 2,261 | 12.99 | 43.81  | 3.372594303 | 0        |
| RAN     | 1,657 | 27.58 | 74.68  | 2.707759246 | 0        |
| RANBP1  | 0.884 | 13.21 | 39.93  | 3.022710068 | 0        |
| RANGAP1 | 3,021 | 10.41 | 35.02  | 3.364073007 | 0        |
| RANGNRF | 0.83  | 7.39  | 17.31  | 2.342354533 | 2.00E-09 |

|         |       |       |        |             |          |
|---------|-------|-------|--------|-------------|----------|
| RARG    | 2.9   | 2.25  | 6.97   | 3.097777778 | 0        |
| RASGRP3 | 4,554 | 1.26  | 10.10  | 8.015873016 | 0        |
| RASIP1  | 3,302 | 0.30  | 16.40  | 54.66666667 | 0        |
| RASSF7  | 1.53  | 2.39  | 10.57  | 4.422594142 | 0        |
| RASSF8  | 2.32  | 0.38  | 3.56   | 9.368421053 | 0        |
| RAVER1  | 3,097 | 4.69  | 40.23  | 8.57782516  | 0        |
| RB1     | 4.74  | 4.05  | 13.45  | 3.320987654 | 0        |
| RBBP8   | 4,102 | 1.21  | 3.96   | 3.272727273 | 0        |
| RBBP9   | 3,861 | 0.15  | 2.16   | 14.4        | 0        |
| RBCK1   | 3,383 | 9.27  | 20.82  | 2.245954693 | 0        |
| RBM10   | 3,756 | 13.56 | 29.33  | 2.162979351 | 0        |
| RBM23   | 2,413 | 16.85 | 35.36  | 2.09851632  | 0        |
| RBM28   | 5,616 | 1.25  | 2.80   | 2.24        | 1.87E-09 |
| RBPMS   | 3,534 | 0.68  | 4.32   | 6.352941176 | 0        |
| RC74    | 2.54  | 2.03  | 11.91  | 5.866995074 | 0        |
| RCCD1   | 2,767 | 1.04  | 7.06   | 6.788461538 | 0        |
| RCL1    | 2,063 | 3.02  | 9.76   | 3.231788079 | 0        |
| RCN3    | 1,854 | 6.51  | 14.91  | 2.290322581 | 0        |
| RCOR2   | 2,931 | 1.89  | 9.33   | 4.936507937 | 0        |
| RDH11   | 2,518 | 4.52  | 29.84  | 6.601769912 | 0        |
| RECK    | 4,412 | 0.72  | 3.42   | 4.75        | 0        |
| RECQL4  | 3,628 | 1.31  | 3.90   | 2.977099237 | 4.80E-13 |
| RENBP   | 1.47  | 3.56  | 13.41  | 3.766853933 | 0        |
| RER1    | 2.94  | 12.42 | 30.78  | 2.47826087  | 0        |
| RETSAT  | 3,001 | 4.74  | 19.51  | 4.116033755 | 0        |
| REXO4   | 2.36  | 6.12  | 20.81  | 3.400326797 | 0        |
| RFC2    | 3,388 | 2.77  | 9.08   | 3.277978339 | 0        |
| RFC4    | 1,571 | 2.39  | 11.74  | 4.912133891 | 0        |
| RFT1    | 2,782 | 2.31  | 7.24   | 3.134199134 | 0        |
| RFTN1   | 3,105 | 38.39 | 114.12 | 2.972649127 | 0        |
| RFX1    | 4.33  | 2.40  | 6.59   | 2.745833333 | 0        |
| RFX5    | 3,736 | 23.44 | 52.95  | 2.258959044 | 0        |
| RFXANK  | 1,519 | 4.30  | 25.56  | 5.944186047 | 0        |
| RGS14   | 2,406 | 2.18  | 12.36  | 5.669724771 | 0        |
| RGS16   | 2,427 | 0.49  | 2.78   | 5.673469388 | 2.78E-11 |
| RGS19   | 1,692 | 5.08  | 57.85  | 11.38779528 | 0        |
| RHBDD1  | 2,423 | 2.41  | 5.75   | 2.385892116 | 2.26E-09 |

|          |       |       |        |             |          |
|----------|-------|-------|--------|-------------|----------|
| RHBDD3   | 1,738 | 3.36  | 7.66   | 2.279761905 | 1.63E-08 |
| RHOBTB2  | 5,077 | 1.01  | 5.89   | 5.831683168 | 0        |
| RHOBTB3  | 4,124 | 0.38  | 2.17   | 5.710526316 | 5.00E-15 |
| RHOT1    | 5,537 | 1.93  | 6.07   | 3.14507772  | 0        |
| RHOU     | 4,322 | 0.25  | 3.08   | 12.32       | 0        |
| RIC8A    | 2,702 | 16.66 | 34.51  | 2.071428571 | 0        |
| RILP     | 1,792 | 2.37  | 7.43   | 3.135021097 | 2.42E-13 |
| RIMS3    | 7,233 | 0.74  | 7.98   | 10.78378378 | 0        |
| RIOK1    | 2,728 | 3.16  | 7.72   | 2.443037975 | 3.10E-14 |
| RKHD1    | 2,132 | 0.42  | 2.92   | 6.952380952 | 1.48E-11 |
| RMI1     | 3,416 | 0.44  | 2.00   | 4.545454545 | 4.32E-10 |
| RN7SK    | 0.332 | 3.88  | 64.96  | 16.74226804 | 0        |
| RN7SL1   | 0.299 | 11.91 | 47.61  | 3.997481108 | 0        |
| RNASE1   | 1,124 | 0.00  | 35.60  | 35.60       | 0        |
| RNASE6   | 1,059 | 1.31  | 32.45  | 24.77099237 | 0        |
| RNASEH2A | 1,142 | 1.82  | 24.12  | 13.25274725 | 0        |
| RNASEH2C | 0.887 | 10.71 | 49.01  | 4.576097106 | 0        |
| RNASEL   | 4,148 | 0.64  | 3.94   | 6.15625     | 0        |
| RNASEN   | 4.74  | 5.82  | 12.92  | 2.219931271 | 0        |
| RNASET2  | 5,865 | 78.00 | 343.69 | 4.406282051 | 0        |
| RNF123   | 4,255 | 4.79  | 12.69  | 2.649269311 | 0        |
| RNF130   | 1,847 | 28.02 | 75.53  | 2.69557459  | 0        |
| RNF14    | 3,903 | 1.82  | 6.19   | 3.401098901 | 0        |
| RNF141   | 4,084 | 2.57  | 5.61   | 2.182879377 | 1.28E-12 |
| RNF167   | 1,708 | 15.41 | 74.57  | 4.839065542 | 0        |
| RNF170   | 1,851 | 0.69  | 3.31   | 4.797101449 | 9.13E-10 |
| RNF185   | 3,166 | 3.35  | 9.93   | 2.964179104 | 0        |
| RNF187   | 3.81  | 4.49  | 28.96  | 6.449888641 | 0        |
| RNF2     | 3,551 | 2.51  | 5.33   | 2.123505976 | 4.53E-10 |
| RNF20    | 3.94  | 4.72  | 13.77  | 2.917372881 | 0        |
| RNF214   | 2,338 | 2.75  | 8.32   | 3.025454545 | 0        |
| RNF26    | 2,786 | 11.33 | 26.51  | 2.339805825 | 0        |
| RNF34    | 2,195 | 5.00  | 11.74  | 2.348       | 0        |
| RNF40    | 4,233 | 10.24 | 25.11  | 2.452148438 | 0        |
| RNF41    | 3,846 | 5.89  | 12.68  | 2.152801358 | 0        |
| RNH1     | 2,218 | 7.85  | 24.27  | 3.091719745 | 0        |
| RNPEP    | 2,413 | 9.51  | 20.39  | 2.144058885 | 0        |



|               |       |         |         |             |          |
|---------------|-------|---------|---------|-------------|----------|
| RNPEPL1       | 2,913 | 24.45   | 57.08   | 2.334560327 | 0        |
| RNPS1         | 2.99  | 34.25   | 71.10   | 2.075912409 | 0        |
| RORC          | 3,214 | 0.15    | 2.15    | 14.33333333 | 0        |
| RP11-320C15.1 | 0.835 | 6.16    | 20.07   | 3.258116883 | 0        |
| RP11-506K6.3  | 1,151 | 2.06    | 12.88   | 6.252427184 | 0        |
| RP13-15M17.2  | 3,846 | 0.75    | 4.16    | 5.546666667 | 0        |
| RP3-405J24.3  | 0.548 | 27.81   | 85.92   | 3.089536138 | 0        |
| RP4-691N24.1  | 4,973 | 2.65    | 6.64    | 2.505660377 | 0        |
| RP5-1077B9.4  | 2,588 | 8.79    | 38.54   | 4.384527873 | 0        |
| RPA1          | 2,795 | 4.00    | 35.89   | 8.9725      | 0        |
| RPA2          | 1.72  | 5.81    | 35.02   | 6.027538726 | 0        |
| RPAP1         | 4,672 | 3.28    | 9.63    | 2.93597561  | 0        |
| RPH3AL        | 2,584 | 0.46    | 16.58   | 36.04347826 | 0        |
| RPIA          | 1,834 | 3.88    | 20.63   | 5.317010309 | 0        |
| RPL12P4       | 0.497 | 46.58   | 115.08  | 2.470588235 | 0        |
| RPL13P2       | 0.659 | 35.58   | 83.22   | 2.338954469 | 0        |
| RPL22L1       | 2,054 | 6.50    | 15.50   | 2.384615385 | 0        |
| RPL29         | 0.695 | 448.85  | 933.26  | 2.079224685 | 0        |
| RPL7A         | 1,157 | 336.75  | 684.96  | 2.03403118  | 0        |
| RPN1          | 2,341 | 27.55   | 93.05   | 3.377495463 | 0        |
| RPN2          | 2.49  | 13.75   | 101.25  | 7.363636364 | 0        |
| RPP40         | 1,159 | 0.34    | 7.41    | 21.79411765 | 0        |
| RPPH1         | 0.341 | 9.87    | 27.67   | 2.803444782 | 1.62E-08 |
| RPS15AP1      | 0.296 | 32.76   | 81.67   | 2.492979243 | 0        |
| RPS18P2       | 0.538 | 377.36  | 785.37  | 2.081222175 | 0        |
| RPS19BP1      | 0.927 | 16.11   | 40.71   | 2.527001862 | 0        |
| RPS19P1       | 0.468 | 346.91  | 895.64  | 2.581764723 | 0        |
| RPS25         | 0.492 | 1480.63 | 3038.82 | 2.052383107 | 0        |
| RPS27L        | 1,084 | 3.83    | 22.46   | 5.864229765 | 0        |
| RPS2L1        | 0.966 | 1.12    | 6.80    | 6.071428571 | 3.92E-12 |
| RPS2P4        | 0.942 | 1.89    | 7.69    | 4.068783069 | 1.19E-09 |
| RPS6KA1       | 3,383 | 8.57    | 38.37   | 4.477246208 | 0        |
| RPS6KA4       | 3,253 | 2.83    | 14.32   | 5.060070671 | 0        |
| RPS6KC1       | 4,182 | 0.57    | 2.36    | 4.140350877 | 5.27E-13 |
| RPS9          | 1,011 | 905.80  | 2082.27 | 2.298818724 | 0        |
| RPUSD1        | 2.05  | 4.20    | 17.91   | 4.264285714 | 0        |
| RPUSD2        | 1,839 | 2.69    | 6.50    | 2.416356877 | 2.30E-08 |

|         |        |       |        |             |          |
|---------|--------|-------|--------|-------------|----------|
| RPUSD3  | 1,201  | 1.16  | 27.29  | 23.52586207 | 0        |
| RRAS    | 0.983  | 4.53  | 14.14  | 3.121412804 | 1.88E-13 |
| RRBP1   | 5,612  | 24.70 | 64.04  | 2.592712551 | 0        |
| RRM1    | 3,104  | 7.30  | 17.40  | 2.383561644 | 0        |
| RRM2    | 2,473  | 3.00  | 21.94  | 7.313333333 | 0        |
| RRP12   | 4,364  | 3.70  | 8.86   | 2.394594595 | 0        |
| RRP9    | 1,543  | 2.12  | 18.35  | 8.655660377 | 0        |
| RRS1    | 1,706  | 2.84  | 14.46  | 5.091549296 | 0        |
| RSAD1   | 2,499  | 2.34  | 15.44  | 6.598290598 | 0        |
| RSHL2   | 2,177  | 0.73  | 3.76   | 5.150684932 | 8.42E-13 |
| RSL1D1  | 1,932  | 44.19 | 89.86  | 2.03349174  | 0        |
| RSRC1   | 1,634  | 2.36  | 7.01   | 2.970338983 | 8.96E-11 |
| RSU1    | 3,806  | 1.84  | 10.14  | 5.510869565 | 0        |
| RTKN    | 3,049  | 0.65  | 7.24   | 11.13846154 | 0        |
| RTN2    | 3.37   | 0.38  | 2.37   | 6.236842105 | 2.00E-14 |
| RTN3    | 8,397  | 3.75  | 8.37   | 2.232       | 0        |
| RTN4RL1 | 3,164  | 0.10  | 4.55   | 45.5        | 0        |
| RUFY1   | 3,213  | 4.52  | 13.82  | 3.057522124 | 0        |
| RUNX1   | 8,379  | 7.09  | 27.34  | 3.856135402 | 0        |
| RUNX2   | 6,334  | 0.47  | 4.38   | 9.319148936 | 0        |
| RUSC1   | 2,163  | 2.56  | 7.55   | 2.94921875  | 2.00E-14 |
| RUVBL1  | 1,736  | 2.17  | 32.95  | 15.1843318  | 0        |
| RUVBL2  | 1,488  | 9.11  | 61.53  | 6.754116356 | 0        |
| S100A1  | 0.594  | 32.48 | 121.39 | 3.737376847 | 0        |
| SAC3D1  | 1,538  | 0.52  | 15.06  | 28.96153846 | 0        |
| SAE1    | 2,109  | 20.78 | 62.59  | 3.012030799 | 0        |
| SAE2    | 2,665  | 7.27  | 23.39  | 3.217331499 | 0        |
| SAMD1   | 0.663  | 4.62  | 38.68  | 8.372294372 | 0        |
| SAMD9   | 14,225 | 1.30  | 3.54   | 2.723076923 | 0        |
| SAMD9L  | 14,264 | 0.93  | 2.17   | 2.333333333 | 0        |
| SAMHD1  | 2,701  | 1.76  | 6.36   | 3.613636364 | 0        |
| SAMM50  | 1,716  | 7.21  | 16.20  | 2.246879334 | 1.00E-15 |
| SAMSN1  | 1,888  | 3.46  | 20.62  | 5.959537572 | 0        |
| SARS2   | 2,057  | 3.85  | 8.44   | 2.192207792 | 4.69E-10 |
| SCAMP2  | 2.04   | 17.99 | 54.94  | 3.053918844 | 0        |
| SCAMP3  | 1,883  | 6.67  | 40.31  | 6.043478261 | 0        |
| SCAMP4  | 2,526  | 3.60  | 21.81  | 6.058333333 | 0        |

|          |       |       |       |             |          |
|----------|-------|-------|-------|-------------|----------|
| SCAMP5   | 3,382 | 0.32  | 2.71  | 8.46875     | 0        |
| SCAP     | 4,255 | 8.07  | 28.39 | 3.517967782 | 0        |
| SCARB1   | 2,555 | 8.75  | 22.12 | 2.528       | 0        |
| SCC-112  | 6,714 | 8.81  | 18.89 | 2.14415437  | 0        |
| SCCPDH   | 2,474 | 5.12  | 13.35 | 2.607421875 | 0        |
| SCD5     | 4,207 | 0.35  | 2.57  | 7.342857143 | 0        |
| SCFD2    | 3,176 | 1.43  | 5.52  | 3.86013986  | 0        |
| SCHIP1   | 2,394 | 5.21  | 23.06 | 4.426103647 | 0        |
| SCLY     | 2,412 | 1.23  | 6.53  | 5.308943089 | 0        |
| SCN1B    | 2,278 | 3.00  | 51.73 | 17.24333333 | 0        |
| SCN3A    | 9,093 | 0.19  | 0.76  | 4           | 3.10E-09 |
| SCNM1    | 1,484 | 11.40 | 25.37 | 2.225438596 | 0        |
| SCO2     | 0.929 | 1.49  | 11.12 | 7.463087248 | 0        |
| SCOTIN   | 2,166 | 28.37 | 79.10 | 2.788156503 | 0        |
| SCP2     | 4,928 | 3.07  | 9.42  | 3.068403909 | 0        |
| SCRIB    | 5,208 | 5.08  | 12.61 | 2.482283465 | 0        |
| SCUBE2   | 3,737 | 0.48  | 1.83  | 3.8125      | 1.17E-08 |
| SCYL1    | 2.57  | 13.86 | 29.40 | 2.121212121 | 0        |
| SDAD1    | 2,753 | 3.45  | 9.42  | 2.730434783 | 0        |
| SDCCAG10 | 2.08  | 2.57  | 10.53 | 4.097276265 | 0        |
| SDCCAG3  | 2,379 | 1.54  | 15.97 | 10.37012987 | 0        |
| SDF2     | 1,075 | 13.07 | 29.85 | 2.283856159 | 0        |
| SDF2L1   | 0.874 | 2.94  | 43.27 | 14.71768707 | 0        |
| SDF4     | 3.33  | 12.10 | 40.59 | 3.354545455 | 0        |
| SDHA     | 2,276 | 25.43 | 58.89 | 2.315768777 | 0        |
| SDHC     | 5,281 | 1.33  | 8.20  | 6.165413534 | 0        |
| SDHD     | 1,313 | 4.07  | 13.02 | 3.199017199 | 0        |
| SEC13    | 1,574 | 21.56 | 84.82 | 3.934137291 | 0        |
| SEC22B   | 1,821 | 9.56  | 25.80 | 2.69874477  | 0        |
| SEC23B   | 3,949 | 2.96  | 11.67 | 3.942567568 | 0        |
| SEC23IP  | 4,243 | 2.94  | 8.93  | 3.037414966 | 0        |
| SEC24D   | 3.99  | 0.89  | 5.59  | 6.280898876 | 0        |
| SEC31A   | 4,237 | 7.85  | 31.49 | 4.011464968 | 0        |
| SEC61A1  | 3,997 | 40.42 | 82.26 | 2.035131123 | 0        |
| SECTM1   | 2,002 | 2.03  | 8.71  | 4.290640394 | 0        |
| SELL     | 2,324 | 4.09  | 12.43 | 3.039119804 | 0        |
| SELS     | 1,878 | 1.80  | 9.73  | 5.405555556 | 0        |

|          |       |        |        |             |          |
|----------|-------|--------|--------|-------------|----------|
| SEMA3F   | 3,516 | 0.12   | 2.23   | 18.58333333 | 0        |
| SEMA4A   | 3.23  | 1.14   | 3.52   | 3.087719298 | 3.21E-11 |
| SEMA6B   | 4,634 | 0.47   | 1.67   | 3.553191489 | 6.34E-09 |
| SEMA7A   | 2.66  | 0.71   | 7.13   | 10.04225352 | 0        |
| SENP3    | 2,411 | 6.60   | 30.78  | 4.663636364 | 0        |
| SEPN1    | 4,332 | 28.89  | 68.56  | 2.373139495 | 0        |
| SEPT11   | 5,555 | 3.17   | 13.30  | 4.195583596 | 0        |
| SEPT6    | 8,577 | 23.72  | 63.07  | 2.658937605 | 0        |
| SEPT9    | 4.1   | 110.25 | 288.70 | 2.618594104 | 0        |
| SEPW1    | 0.88  | 6.07   | 34.08  | 5.614497529 | 0        |
| SEPX1    | 1,367 | 2.24   | 20.09  | 8.96875     | 0        |
| SERBP1   | 6,914 | 9.46   | 19.64  | 2.076109937 | 0        |
| SERF2    | 0.967 | 121.96 | 496.86 | 4.073958675 | 0        |
| SERHL2   | 1,374 | 2.73   | 7.11   | 2.604395604 | 3.39E-08 |
| SERPING1 | 2,005 | 2.71   | 14.45  | 5.332103321 | 0        |
| SERPINH1 | 2,204 | 2.24   | 48.31  | 21.56696429 | 0        |
| SESN2    | 3,485 | 0.97   | 3.63   | 3.742268041 | 8.00E-15 |
| SET      | 2,559 | 29.85  | 68.11  | 2.281742044 | 0        |
| SETBP1   | 5,744 | 1.29   | 3.38   | 2.620155039 | 8.00E-15 |
| SETD3    | 3.3   | 4.47   | 18.99  | 4.248322148 | 0        |
| SETD8    | 2,751 | 3.06   | 13.75  | 4.493464052 | 0        |
| SETDB2   | 3,298 | 2.61   | 6.85   | 2.624521073 | 0        |
| SF3A1    | 5,391 | 17.67  | 42.89  | 2.427277872 | 0        |
| SF3A3P1  | 1,477 | 1.21   | 9.64   | 7.966942149 | 0        |
| SF3A3P2  | 2,716 | 1.53   | 4.43   | 2.895424837 | 9.44E-11 |
| SF3B3    | 4.34  | 11.55  | 46.15  | 3.995670996 | 0        |
| SF3B4    | 1,549 | 39.73  | 80.32  | 2.021646111 | 0        |
| SFRS1    | 2,941 | 29.44  | 61.26  | 2.080842391 | 0        |
| SFRS5    | 3,382 | 117.10 | 243.46 | 2.079077711 | 0        |
| SFRS7    | 3,269 | 18.58  | 44.11  | 2.374058127 | 0        |
| SFRS9    | 2,528 | 30.49  | 82.15  | 2.694326009 | 0        |
| SFT2D3   | 2,811 | 1.94   | 4.65   | 2.396907216 | 4.06E-09 |
| SFXN2    | 2,559 | 0.58   | 3.19   | 5.5         | 4.48E-13 |
| SFXN4    | 2,229 | 1.02   | 5.48   | 5.37254902  | 0        |
| SGOL2    | 4,154 | 0.19   | 2.17   | 11.42105263 | 0        |
| SGPL1    | 4,692 | 6.05   | 14.45  | 2.388429752 | 0        |
| SH2D3C   | 3,106 | 22.08  | 106.37 | 4.817481884 | 0        |

|          |       |        |        |              |          |
|----------|-------|--------|--------|--------------|----------|
| SH3BGRL3 | 0.884 | 143.37 | 460.34 | 3.210853038  | 0        |
| SH3KBP1  | 4,145 | 17.26  | 49.41  | 2.862688297  | 0        |
| SH3PXD2B | 7,777 | 0.56   | 1.66   | 2.964285714  | 7.39E-12 |
| SHANK1   | 6,643 | 1.43   | 4.71   | 3.293706294  | 0        |
| SHARPIN  | 1,764 | 9.59   | 24.07  | 2.509906152  | 0        |
| SHCBP1   | 3,206 | 1.88   | 4.52   | 2.404255319  | 3.51E-10 |
| SHH      | 4,525 | 6.88   | 15.55  | 2.260174419  | 0        |
| SHKBP1   | 2,328 | 13.94  | 36.15  | 2.593256815  | 0        |
| SHMT2    | 2,095 | 15.92  | 37.87  | 2.378768844  | 0        |
| SHQ1     | 2,848 | 0.38   | 5.44   | 14.31578947  | 0        |
| SIHBP1   | 1,887 | 11.38  | 63.30  | 5.562390158  | 0        |
| SIGIRR   | 1,854 | 14.30  | 45.25  | 3.164335664  | 0        |
| SIGLEC1  | 6.72  | 0.16   | 1.09   | 6.8125       | 5.60E-14 |
| SIL1     | 1,989 | 5.57   | 14.95  | 2.684021544  | 0        |
| SIRPA    | 4,487 | 3.66   | 8.99   | 2.456284153  | 0        |
| SIRT2    | 2,815 | 6.19   | 22.48  | 3.631663974  | 0        |
| SIRT5    | 2,941 | 0.87   | 3.03   | 3.482758621  | 2.62E-10 |
| SIRT6    | 1,636 | 2.18   | 11.43  | 5.243119266  | 0        |
| SIRT7    | 1,713 | 8.20   | 16.52  | 2.014634146  | 5.02E-13 |
| SIX5     | 3,145 | 0.10   | 6.99   | 69.9         | 0        |
| SKAP2    | 7,943 | 0.35   | 2.06   | 5.885714286  | 0        |
| SKP1A    | 3,204 | 13.93  | 35.68  | 2.56137832   | 0        |
| SKP2     | 1.8   | 3.02   | 6.97   | 2.30794702   | 2.49E-08 |
| SLAMF6   | 2,733 | 0.68   | 2.86   | 4.205882353  | 7.41E-11 |
| SLAMF8   | 3,178 | 0.75   | 7.08   | 9.44         | 0        |
| SLC10A3  | 2,124 | 2.60   | 6.70   | 2.576923077  | 5.96E-11 |
| SLC12A2  | 6.86  | 0.52   | 1.50   | 2.884615385  | 1.86E-09 |
| SLC12A4  | 3.84  | 1.37   | 3.20   | 2.335766423  | 4.09E-08 |
| SLC15A4  | 2,768 | 2.25   | 8.34   | 3.706666667  | 0        |
| SLC16A1  | 3,355 | 2.19   | 6.91   | 3.155251142  | 0        |
| SLC16A13 | 1,281 | 0.23   | 7.69   | 33.43478261  | 0        |
| SLC19A1  | 4,332 | 2.12   | 7.45   | 3.514150943  | 0        |
| SLC1A5   | 2,844 | 2.40   | 35.60  | 14.833333333 | 0        |
| SLC20A2  | 3,909 | 2.38   | 4.95   | 2.079831933  | 5.93E-10 |
| SLC22A16 | 1,971 | 2.26   | 14.91  | 6.597345133  | 0        |
| SLC22A18 | 1,613 | 2.82   | 9.61   | 3.407801418  | 0        |
| SLC24A1  | 5,377 | 2.22   | 8.04   | 3.621621622  | 0        |

|          |       |       |       |             |          |
|----------|-------|-------|-------|-------------|----------|
| SLC25A1  | 1,583 | 8.50  | 34.06 | 4.007058824 | 0        |
| SLC25A11 | 1.49  | 4.65  | 42.97 | 9.240860215 | 0        |
| SLC25A15 | 1,621 | 0.30  | 3.32  | 11.06666667 | 5.92E-13 |
| SLC25A17 | 2,266 | 0.61  | 4.57  | 7.491803279 | 0        |
| SLC25A19 | 1,651 | 0.30  | 8.27  | 27.56666667 | 0        |
| SLC25A20 | 1,787 | 1.00  | 30.41 | 30.41       | 0        |
| SLC25A22 | 2,754 | 1.90  | 7.09  | 3.731578947 | 0        |
| SLC25A33 | 1,461 | 1.28  | 4.85  | 3.7890625   | 2.98E-09 |
| SLC25A39 | 1.55  | 29.81 | 71.63 | 2.402884938 | 0        |
| SLC25A40 | 3.03  | 0.62  | 2.52  | 4.064516129 | 4.80E-10 |
| SLC27A1  | 3,547 | 3.80  | 12.42 | 3.268421053 | 0        |
| SLC27A3  | 2,413 | 8.32  | 48.21 | 5.794471154 | 0        |
| SLC27A4  | 2,948 | 0.51  | 9.37  | 18.37254902 | 0        |
| SLC29A1  | 2,162 | 0.51  | 4.01  | 7.862745098 | 0        |
| SLC29A3  | 2.24  | 1.90  | 7.10  | 3.736842105 | 0        |
| SLC2A9   | 2,079 | 1.72  | 16.37 | 9.51744186  | 0        |
| SLC30A5  | 3,979 | 1.61  | 6.46  | 4.01242236  | 0        |
| SLC35A4  | 2,657 | 9.61  | 38.80 | 4.037460978 | 0        |
| SLC35A5  | 2.94  | 1.85  | 5.13  | 2.772972973 | 1.49E-12 |
| SLC35B2  | 2,024 | 6.79  | 24.56 | 3.617083947 | 0        |
| SLC35B3  | 2.04  | 1.60  | 4.91  | 3.06875     | 1.17E-09 |
| SLC35B4  | 13.59 | 0.83  | 1.92  | 2.313253012 | 1.00E-15 |
| SLC35C1  | 2,793 | 1.70  | 8.09  | 4.758823529 | 0        |
| SLC35C2  | 2,824 | 4.98  | 14.97 | 3.006024096 | 0        |
| SLC35F2  | 2.91  | 0.82  | 7.61  | 9.280487805 | 0        |
| SLC37A4  | 2.52  | 1.69  | 7.62  | 4.50887574  | 0        |
| SLC38A5  | 2,655 | 2.53  | 9.23  | 3.648221344 | 0        |
| SLC39A1  | 2,427 | 7.05  | 28.53 | 4.046808511 | 0        |
| SLC39A11 | 2,737 | 1.33  | 7.44  | 5.593984962 | 0        |
| SLC39A14 | 4,611 | 0.26  | 7.55  | 29.03846154 | 0        |
| SLC39A3  | 4,158 | 2.31  | 8.80  | 3.80952381  | 0        |
| SLC39A4  | 3,124 | 0.63  | 4.88  | 7.746031746 | 0        |
| SLC39A5  | 2.85  | 4.65  | 10.28 | 2.210752688 | 0        |
| SLC39A6  | 2,733 | 1.56  | 7.06  | 4.525641026 | 0        |
| SLC39A8  | 3,292 | 4.84  | 10.88 | 2.247933884 | 0        |
| SLC3A2   | 3,127 | 14.30 | 41.27 | 2.886013986 | 0        |
| SLC41A1  | 4,854 | 15.02 | 34.02 | 2.264980027 | 0        |

|          |       |       |        |             |          |
|----------|-------|-------|--------|-------------|----------|
| SLC43A1  | 2,498 | 2.50  | 18.95  | 7.58        | 0        |
| SLC43A3  | 2,822 | 6.69  | 94.41  | 14.11210762 | 0        |
| SLC44A1  | 4,298 | 8.98  | 48.26  | 5.374164811 | 0        |
| SLC45A3  | 3,382 | 1.81  | 25.98  | 14.35359116 | 0        |
| SLC4A1   | 3,636 | 1.44  | 10.12  | 7.027777778 | 0        |
| SLC4A1AP | 2,954 | 2.31  | 8.04   | 3.480519481 | 0        |
| SLC4A2   | 8,112 | 2.63  | 9.26   | 3.520912548 | 0        |
| SLC5A6   | 3,145 | 3.11  | 19.37  | 6.22829582  | 0        |
| SLC7A1   | 7,239 | 1.85  | 4.23   | 2.286486486 | 0        |
| SLC7A6   | 6.25  | 8.61  | 18.52  | 2.150987224 | 0        |
| SLC7A6OS | 1,607 | 6.22  | 13.05  | 2.09807074  | 8.02E-11 |
| SLC9A1   | 4,517 | 1.99  | 12.93  | 6.497487437 | 0        |
| SLC9A3R1 | 1,984 | 10.83 | 75.32  | 6.954755309 | 0        |
| SLC9A3R2 | 1,557 | 9.15  | 43.63  | 4.768306011 | 0        |
| SLC9A9   | 3,543 | 1.90  | 14.22  | 7.484210526 | 0        |
| SLCO2B1  | 4,068 | 4.69  | 74.98  | 15.98720682 | 0        |
| SMARCAL1 | 3.04  | 0.82  | 5.98   | 7.292682927 | 0        |
| SMARCB1  | 1,815 | 25.02 | 105.26 | 4.207034373 | 0        |
| SMARCC1  | 5,749 | 10.44 | 24.95  | 2.389846743 | 0        |
| SMARCD2  | 2,704 | 31.65 | 65.48  | 2.068878357 | 0        |
| SMC1A    | 9,725 | 2.80  | 15.84  | 5.657142857 | 0        |
| SMC2     | 4,149 | 0.84  | 5.65   | 6.726190476 | 0        |
| SMO      | 7,476 | 0.60  | 4.57   | 7.616666667 | 0        |
| SMPD1    | 3,272 | 1.90  | 4.43   | 2.331578947 | 1.03E-09 |
| SMPD2    | 1.68  | 5.77  | 13.09  | 2.268630849 | 4.69E-13 |
| SMS      | 1,688 | 6.62  | 21.66  | 3.271903323 | 0        |
| SMTN     | 3,671 | 0.73  | 3.71   | 5.082191781 | 0        |
| SMUG1    | 1.57  | 0.69  | 5.47   | 7.927536232 | 0        |
| SMYD2    | 1,671 | 3.67  | 8.42   | 2.294277929 | 5.35E-09 |
| SMYD5    | 2,543 | 3.96  | 8.34   | 2.106060606 | 4.37E-11 |
| SNAI1    | 1,695 | 11.27 | 22.56  | 2.001774623 | 0        |
| SNAP29   | 2,869 | 2.73  | 8.60   | 3.15018315  | 0        |
| SNAPAP   | 0.96  | 9.28  | 31.94  | 3.441810345 | 0        |
| SNAPC2   | 1,513 | 2.29  | 8.51   | 3.716157205 | 8.00E-15 |
| SNAPC3   | 3,095 | 1.08  | 3.65   | 3.37962963  | 2.44E-12 |
| SND1     | 7,016 | 18.40 | 38.60  | 2.097826087 | 0        |
| SNHG8    | 0.874 | 2.27  | 8.57   | 3.775330396 | 2.86E-09 |

|          |       |       |        |             |          |
|----------|-------|-------|--------|-------------|----------|
| SNORA73A | 0.207 | 4.30  | 38.25  | 8.895348837 | 0        |
| SNRPA    | 1,606 | 30.56 | 69.34  | 2.268979058 | 0        |
| SNRPD3   | 1,685 | 16.97 | 53.88  | 3.175014732 | 0        |
| SNRPG    | 0.58  | 10.24 | 25.56  | 2.49609375  | 8.83E-11 |
| SNRPN    | 2,169 | 6.25  | 18.26  | 2.9216      | 0        |
| SNUPN    | 1,434 | 2.14  | 18.56  | 8.672897196 | 0        |
| SNURF    | 1,351 | 16.26 | 48.26  | 2.96801968  | 0        |
| SNX11    | 2,656 | 1.68  | 5.27   | 3.136904762 | 1.25E-13 |
| SNX12    | 0.642 | 3.08  | 13.60  | 4.415584416 | 4.72E-12 |
| SNX15    | 1,909 | 2.74  | 12.53  | 4.572992701 | 0        |
| SNX22    | 3,614 | 5.56  | 18.60  | 3.345323741 | 0        |
| SNX27    | 7,085 | 1.00  | 5.33   | 5.33        | 0        |
| SNX3     | 1,463 | 35.78 | 72.55  | 2.027669089 | 0        |
| SNX7     | 2,337 | 7.66  | 18.69  | 2.439947781 | 0        |
| SOD1     | 0.966 | 44.45 | 145.71 | 3.278065242 | 0        |
| SOLH     | 4,744 | 4.92  | 18.50  | 3.760162602 | 0        |
| SONP1    | 2.49  | 1.51  | 9.57   | 6.337748344 | 0        |
| SORD     | 2,515 | 1.69  | 10.85  | 6.420118343 | 0        |
| SOX12    | 4.63  | 2.50  | 19.03  | 7.612       | 0        |
| SP110    | 2,683 | 4.50  | 9.23   | 2.051111111 | 5.11E-12 |
| SP140    | 3,567 | 0.75  | 2.93   | 3.906666667 | 5.17E-13 |
| SPAG5    | 3,808 | 2.28  | 8.18   | 3.587719298 | 0        |
| SPARC    | 3,141 | 10.11 | 29.02  | 2.870425321 | 0        |
| SPC24    | 2,289 | 2.29  | 11.55  | 5.043668122 | 0        |
| SPECC1   | 4,706 | 0.63  | 4.19   | 6.650793651 | 0        |
| SPECC1L  | 6,211 | 3.33  | 8.15   | 2.447447447 | 0        |
| SPG20    | 4,822 | 1.15  | 5.24   | 4.556521739 | 0        |
| SPG21    | 1,798 | 9.69  | 30.12  | 3.108359133 | 0        |
| SPHK1    | 2,997 | 5.32  | 12.14  | 2.281954887 | 0        |
| SPHK2    | 2,963 | 1.64  | 7.88   | 4.804878049 | 0        |
| SPINT2   | 1,552 | 48.45 | 103.96 | 2.145717234 | 0        |
| SPN      | 6,973 | 4.99  | 18.88  | 3.783567134 | 0        |
| SPRED1   | 3,816 | 1.09  | 2.85   | 2.614678899 | 8.61E-09 |
| SPRY4    | 4,925 | 0.80  | 11.44  | 14.3        | 0        |
| SPRYD3   | 2,568 | 1.16  | 9.91   | 8.543103448 | 0        |
| SPRYD4   | 1,077 | 2.84  | 11.11  | 3.911971831 | 6.00E-15 |
| SPSB1    | 3,075 | 3.22  | 13.15  | 4.083850932 | 0        |



|            |        |       |        |              |          |
|------------|--------|-------|--------|--------------|----------|
| SPSB2      | 1,188  | 0.84  | 5.60   | 6.666666667  | 2.33E-12 |
| SPSB4      | 2,418  | 0.08  | 7.04   | 88           | 0        |
| SPTB       | 10,436 | 0.20  | 1.10   | 5.5          | 0        |
| SPTLC2     | 8,042  | 12.10 | 25.69  | 2.123140496  | 0        |
| SRBD1      | 3,663  | 1.84  | 3.87   | 2.10326087   | 9.19E-08 |
| SRD5A2L    | 2,272  | 0.30  | 3.71   | 12.366666667 | 0        |
| SRF        | 4,318  | 5.62  | 19.62  | 3.491103203  | 0        |
| SRGAP2     | 6,323  | 4.49  | 9.50   | 2.115812918  | 0        |
| SRM        | 1,273  | 16.56 | 107.26 | 6.47705314   | 0        |
| SRP68      | 2,515  | 12.86 | 30.68  | 2.385692068  | 0        |
| SRPRB      | 1,745  | 4.65  | 19.67  | 4.230107527  | 0        |
| SRR        | 2,477  | 1.04  | 6.19   | 5.951923077  | 0        |
| SSB        | 1,643  | 14.27 | 35.89  | 2.515066573  | 0        |
| SSBP3      | 4.05   | 0.58  | 12.15  | 20.94827586  | 0        |
| SSBP4      | 1,884  | 2.26  | 8.53   | 3.774336283  | 0        |
| SSH1       | 4,023  | 0.79  | 2.89   | 3.658227848  | 1.91E-13 |
| SSNA1      | 0.858  | 23.06 | 62.74  | 2.720728534  | 0        |
| SSR1       | 3,236  | 12.63 | 29.34  | 2.32304038   | 0        |
| SSR2       | 1,092  | 84.99 | 182.13 | 2.142957995  | 0        |
| SSR3       | 3,064  | 8.30  | 17.68  | 2.130120482  | 0        |
| SSR4       | 0.902  | 79.74 | 261.96 | 3.285176825  | 0        |
| SSRP1      | 2,819  | 19.58 | 64.48  | 3.293156282  | 0        |
| SSSCA1     | 0.654  | 6.05  | 27.69  | 4.576859504  | 0        |
| SSU72      | 2,801  | 19.82 | 44.87  | 2.263874874  | 0        |
| ST14       | 3.3    | 2.49  | 14.27  | 5.730923695  | 0        |
| ST3GAL2    | 2,479  | 1.28  | 5.85   | 4.5703125    | 0        |
| ST3GAL3    | 3,596  | 5.31  | 14.83  | 2.792843691  | 0        |
| ST5        | 4,705  | 0.48  | 3.06   | 6.375        | 0        |
| ST6GAL1    | 4,629  | 2.39  | 14.87  | 6.221757322  | 0        |
| ST6GALNAC4 | 2,104  | 8.27  | 18.70  | 2.261185006  | 0        |
| ST7L       | 4,861  | 1.24  | 3.02   | 2.435483871  | 1.76E-10 |
| STAMPB     | 2,618  | 2.00  | 9.53   | 4.765        | 0        |
| STAP2      | 1,612  | 2.83  | 12.38  | 4.374558304  | 0        |
| STAT1      | 4,504  | 1.72  | 8.68   | 5.046511628  | 0        |
| STAT6      | 3,979  | 18.62 | 68.11  | 3.657894737  | 0        |
| STAU2      | 4,042  | 0.79  | 2.54   | 3.215189873  | 1.68E-10 |
| STC2       | 5,343  | 0.67  | 8.04   | 12           | 0        |

|         |        |       |        |             |          |
|---------|--------|-------|--------|-------------|----------|
| STIL    | 5,185  | 0.75  | 2.01   | 2.68        | 1.27E-08 |
| STIP1   | 2,111  | 7.17  | 93.69  | 13.06694561 | 0        |
| STK10   | 4,383  | 12.59 | 31.20  | 2.478157268 | 0        |
| STK11   | 3,276  | 9.70  | 25.04  | 2.581443299 | 0        |
| STK3    | 2.82   | 1.16  | 3.73   | 3.215517241 | 1.02E-10 |
| STK39   | 3,273  | 4.60  | 10.68  | 2.32173913  | 0        |
| STMN1   | 1,918  | 22.43 | 110.72 | 4.936246099 | 0        |
| STOM    | 5,199  | 10.09 | 23.57  | 2.335976214 | 0        |
| STOML1  | 1,986  | 0.69  | 3.56   | 5.15942029  | 1.88E-11 |
| STOML2  | 1,278  | 10.53 | 27.69  | 2.62962963  | 0        |
| STRA13  | 0.73   | 5.96  | 30.69  | 5.149328859 | 0        |
| STRBP   | 3,007  | 10.96 | 31.91  | 2.91149635  | 0        |
| STS     | 6,352  | 0.75  | 4.70   | 6.266666667 | 0        |
| STT3A   | 2,463  | 10.76 | 62.89  | 5.844795539 | 0        |
| STUB1   | 1,602  | 11.42 | 36.28  | 3.176882662 | 0        |
| STX8    | 0.968  | 6.85  | 23.41  | 3.417518248 | 0        |
| STXBP1  | 5,826  | 0.17  | 3.73   | 21.94117647 | 0        |
| STYXL1  | 2,832  | 1.12  | 10.60  | 9.464285714 | 0        |
| SUCLG2  | 2,319  | 5.37  | 13.30  | 2.476722533 | 0        |
| SUFU    | 4,898  | 1.35  | 9.07   | 6.718518519 | 0        |
| SULF2   | 3,897  | 1.80  | 7.95   | 4.416666667 | 0        |
| SUMF2   | 4.01   | 12.85 | 32.60  | 2.536964981 | 0        |
| SURF2   | 0.831  | 5.48  | 17.54  | 3.200729927 | 2.40E-14 |
| SURF4   | 2,969  | 23.43 | 49.99  | 2.133589415 | 0        |
| SURF5   | 4,882  | 2.61  | 5.74   | 2.199233716 | 2.00E-15 |
| SURF6   | 2,314  | 4.96  | 14.41  | 2.905241935 | 0        |
| SUSD1   | 2,996  | 1.62  | 4.70   | 2.901234568 | 2.07E-12 |
| SUSD3   | 2.09   | 31.53 | 227.44 | 7.21344751  | 0        |
| SUV39H1 | 2,726  | 3.34  | 9.36   | 2.80239521  | 0        |
| SV2B    | 5,311  | 1.34  | 3.50   | 2.611940299 | 3.30E-14 |
| SYDE1   | 3,254  | 1.49  | 8.41   | 5.644295302 | 0        |
| SYK     | 3.72   | 12.55 | 38.50  | 3.067729084 | 0        |
| SYNGAP1 | 6.01   | 2.01  | 4.10   | 2.039800995 | 9.19E-12 |
| SYNGR2  | 1,694  | 12.62 | 32.57  | 2.580824089 | 0        |
| SYNJ2   | 6,738  | 1.17  | 2.36   | 2.017094017 | 5.11E-08 |
| TACC2   | 10,096 | 0.05  | 0.88   | 17.6        | 0        |
| TACC3   | 3,447  | 11.05 | 30.51  | 2.761085973 | 0        |

|            |       |       |        |              |          |
|------------|-------|-------|--------|--------------|----------|
| TADA3L     | 3,323 | 2.92  | 18.23  | 6.243150685  | 0        |
| TAF12      | 1.09  | 4.36  | 21.71  | 4.979357798  | 0        |
| TAF3       | 7,355 | 0.78  | 2.86   | 3.666666667  | 0        |
| TAF4       | 4,628 | 1.71  | 7.50   | 4.385964912  | 0        |
| TAF4B      | 4,772 | 0.93  | 2.33   | 2.505376344  | 1.34E-08 |
| TAF6       | 6,672 | 2.41  | 8.29   | 3.439834025  | 0        |
| TAF6L      | 2,016 | 2.41  | 8.48   | 3.518672199  | 0        |
| TALDO1     | 1,243 | 23.24 | 106.46 | 4.580895009  | 0        |
| TAOK2      | 6,759 | 2.18  | 9.01   | 4.133027523  | 0        |
| TAOK3      | 4,185 | 5.48  | 12.80  | 2.335766423  | 0        |
| TAPBPL     | 1,718 | 5.41  | 22.60  | 4.177449168  | 0        |
| TARBP2     | 2,244 | 3.93  | 11.90  | 3.027989822  | 0        |
| TAS2R42    | 1,469 | 4.71  | 12.05  | 2.558386412  | 3.79E-13 |
| TAX1BP3    | 1,381 | 11.17 | 34.28  | 3.068934646  | 0        |
| TBC1D10B   | 3,093 | 16.25 | 33.79  | 2.079384615  | 0        |
| TBC1D10C   | 1,911 | 24.54 | 53.04  | 2.161369193  | 0        |
| TBC1D13    | 3,778 | 4.61  | 12.15  | 2.635574837  | 0        |
| TBC1D16    | 3,916 | 6.54  | 18.06  | 2.76146789   | 0        |
| TBC1D17    | 2,219 | 7.18  | 18.64  | 2.596100279  | 0        |
| TBC1D24    | 4,317 | 0.09  | 1.39   | 15.444444444 | 1.00E-15 |
| TBC1D4     | 5,922 | 1.75  | 5.63   | 3.217142857  | 0        |
| TBC1D5     | 6,804 | 3.93  | 11.55  | 2.938931298  | 0        |
| TBC1D9     | 5,513 | 3.24  | 6.59   | 2.033950617  | 0        |
| TBC1D9B    | 5,167 | 10.59 | 30.09  | 2.841359773  | 0        |
| TBCA       | 0.951 | 23.93 | 86.96  | 3.633932303  | 0        |
| TBCAP1     | 0.557 | 14.92 | 38.11  | 2.554289544  | 3.00E-15 |
| TBCB       | 1,475 | 11.14 | 42.20  | 3.788150808  | 0        |
| TBCCD1     | 2.41  | 1.56  | 4.76   | 3.051282051  | 4.42E-11 |
| TBCE       | 1,867 | 3.60  | 7.58   | 2.105555556  | 5.90E-08 |
| TBKBP1     | 4,316 | 14.44 | 66.50  | 4.605263158  | 0        |
| TBL2       | 6,082 | 0.97  | 3.66   | 3.773195876  | 0        |
| TBL3       | 2,594 | 3.09  | 13.61  | 4.404530744  | 0        |
| TBRG4      | 4,604 | 4.44  | 9.71   | 2.186936937  | 0        |
| TBX21      | 2,572 | 6.08  | 43.14  | 7.095394737  | 0        |
| TBXA2R     | 2,442 | 7.54  | 21.81  | 2.892572944  | 0        |
| TBXAS1     | 4,242 | 0.59  | 4.43   | 7.508474576  | 0        |
| tcag7.1239 | 0.393 | 2.02  | 15.00  | 7.425742574  | 2.05E-11 |

|        |       |        |        |             |          |
|--------|-------|--------|--------|-------------|----------|
| TCEB2  | 1.29  | 23.55  | 60.93  | 2.587261146 | 0        |
| TCFL5  | 2,456 | 1.61   | 13.46  | 8.360248447 | 0        |
| TCHP   | 3,151 | 3.32   | 9.76   | 2.939759036 | 0        |
| TCL1A  | 1,311 | 203.61 | 841.78 | 4.134276313 | 0        |
| TCL1B  | 2,453 | 20.37  | 270.80 | 13.29405989 | 0        |
| TCL6   | 9,997 | 0.48   | 3.90   | 8.125       | 0        |
| TCOF1  | 6,293 | 3.89   | 12.36  | 3.177377892 | 0        |
| TCTA   | 2,146 | 12.91  | 29.12  | 2.255615802 | 0        |
| TDP1   | 3,747 | 1.30   | 5.37   | 4.130769231 | 0        |
| TDPX2  | 0.958 | 2.69   | 55.74  | 20.72118959 | 0        |
| TEGT   | 2.58  | 61.05  | 173.43 | 2.840786241 | 0        |
| TENC1  | 5,372 | 2.92   | 12.78  | 4.376712329 | 0        |
| TESK1  | 2,516 | 3.11   | 8.61   | 2.768488746 | 0        |
| TEX10  | 3,024 | 3.31   | 7.85   | 2.371601208 | 6.00E-15 |
| TEX2   | 5.09  | 1.36   | 8.59   | 6.316176471 | 0        |
| TEX261 | 3,367 | 9.16   | 22.07  | 2.409388646 | 0        |
| TEX264 | 2,526 | 13.04  | 39.97  | 3.065184049 | 0        |
| TFAP2E | 2,189 | 0.36   | 12.00  | 33.33333333 | 0        |
| TFAP4  | 2.14  | 0.78   | 7.95   | 10.19230769 | 0        |
| TFCP2  | 2,372 | 2.17   | 15.91  | 7.331797235 | 0        |
| TFDP1  | 2,367 | 3.47   | 15.30  | 4.409221902 | 0        |
| TFPT   | 1,069 | 7.40   | 25.45  | 3.439189189 | 0        |
| TGFB1  | 2,346 | 25.69  | 69.77  | 2.71584274  | 0        |
| TGFB11 | 1,802 | 3.02   | 7.81   | 2.586092715 | 8.51E-11 |
| TGFBI  | 2,691 | 0.52   | 3.51   | 6.75        | 0        |
| THAP11 | 1,886 | 7.03   | 19.12  | 2.719772404 | 0        |
| THAP3  | 2,052 | 1.97   | 7.39   | 3.751269036 | 0        |
| THAP7  | 2,209 | 2.37   | 6.90   | 2.911392405 | 1.45E-13 |
| THEM2  | 0.739 | 2.41   | 17.44  | 7.236514523 | 0        |
| THOC3  | 1,563 | 15.89  | 42.47  | 2.672750157 | 0        |
| THOC4  | 1,088 | 18.55  | 53.19  | 2.867385445 | 0        |
| THOC5  | 2,754 | 5.89   | 13.00  | 2.20713073  | 0        |
| THOC6  | 1,354 | 2.12   | 21.09  | 9.948113208 | 0        |
| THOC7  | 0.92  | 11.83  | 32.69  | 2.763313609 | 0        |
| THOP1  | 2.55  | 8.35   | 26.82  | 3.211976048 | 0        |
| THRAP5 | 2,924 | 3.28   | 20.11  | 6.131097561 | 0        |
| THTPA  | 2,132 | 3.48   | 10.83  | 3.112068966 | 0        |

|          |       |       |        |             |          |
|----------|-------|-------|--------|-------------|----------|
| THYN1    | 1,769 | 5.48  | 14.05  | 2.563868613 | 0        |
| TIAM1    | 5,453 | 0.36  | 3.42   | 9.5         | 0        |
| TICAM1   | 4,115 | 0.99  | 3.69   | 3.727272727 | 0        |
| TIE1     | 3,882 | 2.37  | 15.67  | 6.611814346 | 0        |
| TIGD5    | 2,264 | 0.83  | 4.84   | 5.831325301 | 0        |
| TIGD7    | 2,569 | 2.66  | 5.80   | 2.180451128 | 1.24E-08 |
| TIMELESS | 4,354 | 1.75  | 7.20   | 4.114285714 | 0        |
| TIMM13   | 2,369 | 11.82 | 37.91  | 3.207275804 | 0        |
| TIMM22   | 1.69  | 5.80  | 13.55  | 2.336206897 | 4.20E-14 |
| TIMM50   | 2,572 | 4.31  | 16.08  | 3.730858469 | 0        |
| TIMM8B   | 0.414 | 9.56  | 60.63  | 6.342050209 | 0        |
| TIMP1    | 0.916 | 23.22 | 51.40  | 2.213608958 | 0        |
| TINF2    | 2,095 | 9.02  | 29.95  | 3.320399113 | 0        |
| TIPRL    | 3.22  | 2.67  | 5.65   | 2.116104869 | 6.27E-10 |
| TK1      | 1.42  | 3.90  | 23.31  | 5.976923077 | 0        |
| TLN1     | 8.17  | 15.01 | 44.13  | 2.940039973 | 0        |
| TLR9     | 3,868 | 0.20  | 2.27   | 11.35       | 0        |
| TM2D1    | 1.25  | 1.26  | 5.39   | 4.277777778 | 6.94E-10 |
| TM4SF1   | 1,691 | 2.04  | 16.04  | 7.862745098 | 0        |
| TM7SF3   | 2,525 | 3.14  | 17.84  | 5.681528662 | 0        |
| TM9SF1   | 3,053 | 2.76  | 13.61  | 4.93115942  | 0        |
| TM9SF4   | 3,727 | 10.25 | 22.37  | 2.182439024 | 0        |
| TMBIM4   | 1,298 | 3.81  | 20.11  | 5.278215223 | 0        |
| TMCO1    | 1.42  | 3.41  | 21.71  | 6.366568915 | 0        |
| TMCO6    | 1,889 | 2.10  | 8.07   | 3.842857143 | 0        |
| TMED1    | 1,357 | 3.80  | 12.54  | 3.3         | 0        |
| TMED10   | 4,085 | 19.42 | 42.38  | 2.182286303 | 0        |
| TMED2    | 2,039 | 21.30 | 46.60  | 2.187793427 | 0        |
| TMED3    | 1,388 | 8.83  | 27.74  | 3.141562854 | 0        |
| TMED9    | 1,402 | 45.52 | 110.31 | 2.423330404 | 0        |
| TMEM101  | 1,539 | 5.01  | 24.91  | 4.972055888 | 0        |
| TMEM102  | 1,973 | 0.65  | 3.25   | 5           | 6.28E-10 |
| TMEM103  | 1,349 | 3.88  | 19.86  | 5.118556701 | 0        |
| TMEM106A | 2,795 | 3.29  | 13.36  | 4.060790274 | 0        |
| TMEM106C | 1.43  | 8.30  | 21.15  | 2.548192771 | 0        |
| TMEM109  | 2,082 | 23.00 | 56.15  | 2.441304348 | 0        |
| TMEM121  | 1,519 | 0.33  | 6.49   | 19.66666667 | 0        |

|          |       |        |        |             |          |
|----------|-------|--------|--------|-------------|----------|
| TMEM128  | 1,732 | 1.60   | 5.11   | 3.19375     | 2.73E-09 |
| TMEM131  | 6,257 | 4.76   | 11.96  | 2.512605042 | 0        |
| TMEM134  | 0.945 | 5.24   | 14.26  | 2.721374046 | 3.73E-11 |
| TMEM141  | 0.768 | 8.89   | 37.84  | 4.256467942 | 0        |
| TMEM142A | 1,475 | 18.31  | 41.46  | 2.264336428 | 0        |
| TMEM142C | 2,178 | 4.31   | 20.00  | 4.64037123  | 0        |
| TMEM143  | 2,249 | 0.97   | 3.41   | 3.515463918 | 6.34E-09 |
| TMEM147  | 0.851 | 13.48  | 56.82  | 4.215133531 | 0        |
| TMEM14C  | 0.983 | 10.67  | 29.39  | 2.754451734 | 0        |
| TMEM154  | 3,085 | 1.76   | 15.30  | 8.693181818 | 0        |
| TMEM159  | 1,812 | 2.02   | 5.40   | 2.673267327 | 3.39E-08 |
| TMEM160  | 0.655 | 6.65   | 22.37  | 3.363909774 | 3.00E-15 |
| TMEM161A | 1,779 | 1.28   | 14.01  | 10.9453125  | 0        |
| TMEM164  | 1,308 | 1.06   | 4.82   | 4.547169811 | 4.56E-09 |
| TMEM16K  | 2,734 | 1.63   | 4.84   | 2.969325153 | 3.12E-12 |
| TMEM173  | 1,688 | 18.28  | 59.54  | 3.257111597 | 0        |
| TMEM177  | 1,385 | 0.92   | 9.00   | 9.782608696 | 0        |
| TMEM19   | 4,659 | 1.04   | 4.57   | 4.394230769 | 0        |
| TMEM23   | 3,753 | 0.74   | 2.31   | 3.121621622 | 9.19E-09 |
| TMEM24   | 3,344 | 2.34   | 5.29   | 2.260683761 | 1.11E-10 |
| TMEM39B  | 2,124 | 6.71   | 20.14  | 3.001490313 | 0        |
| TMEM4    | 1,209 | 10.39  | 49.68  | 4.781520693 | 0        |
| TMEM42   | 0.973 | 3.46   | 13.59  | 3.927745665 | 0        |
| TMEM43   | 3,236 | 6.39   | 21.79  | 3.410015649 | 0        |
| TMEM44   | 2,345 | 2.66   | 6.32   | 2.37593985  | 8.91E-10 |
| TMEM48   | 2,521 | 1.49   | 5.33   | 3.577181208 | 7.00E-15 |
| TMEM49   | 2,509 | 5.13   | 13.83  | 2.695906433 | 0        |
| TMEM79   | 2,156 | 0.60   | 3.94   | 6.566666667 | 5.00E-15 |
| TMEM8    | 2.53  | 4.14   | 12.25  | 2.958937198 | 0        |
| TMEM80   | 1,572 | 5.35   | 12.92  | 2.414953271 | 1.64E-13 |
| TMEM9    | 1,527 | 7.84   | 20.24  | 2.581632653 | 0        |
| TMEM92   | 2,685 | 0.55   | 4.64   | 8.436363636 | 0        |
| TMEM97   | 2,115 | 1.03   | 5.73   | 5.563106796 | 0        |
| TMEM99   | 0.855 | 1.04   | 9.56   | 9.192307692 | 0        |
| TMLHE    | 2,835 | 2.51   | 6.51   | 2.593625498 | 4.70E-14 |
| TMPO     | 4,626 | 4.68   | 17.98  | 3.841880342 | 0        |
| TMSB4X   | 1,389 | 150.43 | 591.53 | 3.932260852 | 0        |

|                 |        |       |        |             |          |
|-----------------|--------|-------|--------|-------------|----------|
| TMSL3           | 0.634  | 30.27 | 72.68  | 2.401057152 | 0        |
| TNFAIP8         | 1.99   | 1.84  | 5.12   | 2.782608696 | 5.26E-09 |
| TNFAIP8L1       | 2,187  | 2.85  | 12.63  | 4.431578947 | 0        |
| TNFAIP8L2       | 1,152  | 2.92  | 25.44  | 8.712328767 | 0        |
| TNFRSF1A        | 2,204  | 25.22 | 98.76  | 3.91593973  | 0        |
| TNFRSF1B        | 3,675  | 14.11 | 57.35  | 4.064493267 | 0        |
| TNFSF12         | 1,386  | 2.28  | 7.96   | 3.49122807  | 1.12E-12 |
| TNFSF12-TNFSF13 | 1,823  | 2.87  | 12.94  | 4.508710801 | 0        |
| TNFSF13         | 2,959  | 2.64  | 8.74   | 3.310606061 | 0        |
| TNIP2           | 1,932  | 7.93  | 17.44  | 2.19924338  | 0        |
| TNKS1BP1        | 5,952  | 0.76  | 2.66   | 3.5         | 0        |
| TNRC5           | 3,432  | 24.48 | 91.32  | 3.730392157 | 0        |
| TNS3            | 15,254 | 1.08  | 3.16   | 2.925925926 | 0        |
| TOM1L2          | 2,944  | 1.18  | 5.52   | 4.677966102 | 0        |
| TOMM22          | 1,378  | 44.94 | 94.08  | 2.093457944 | 0        |
| TOMM34          | 2,049  | 4.30  | 18.05  | 4.197674419 | 0        |
| TOMM40          | 2,299  | 12.48 | 36.47  | 2.922275641 | 0        |
| TOMM40L         | 2,679  | 1.33  | 4.53   | 3.406015038 | 5.78E-13 |
| TOMM70A         | 4.36   | 5.68  | 13.49  | 2.375       | 0        |
| TOP1MT          | 1.91   | 17.40 | 36.12  | 2.075862069 | 0        |
| TOP2A           | 5,698  | 1.46  | 19.16  | 13.12328767 | 0        |
| TOP3A           | 4,116  | 1.73  | 5.75   | 3.323699422 | 0        |
| TOR1A           | 2,106  | 4.23  | 16.52  | 3.905437352 | 0        |
| TOR1B           | 2,769  | 1.75  | 5.75   | 3.285714286 | 0        |
| TOR2A           | 2,467  | 1.32  | 6.97   | 5.28030303  | 0        |
| TOX             | 4,131  | 2.20  | 9.92   | 4.509090909 | 0        |
| TP53            | 2,621  | 4.53  | 75.40  | 16.64459161 | 0        |
| TP53BP1         | 6.27   | 3.52  | 9.66   | 2.744318182 | 0        |
| TP53I11         | 2,656  | 4.40  | 34.65  | 7.875       | 0        |
| TP53RK          | 3,373  | 0.85  | 4.74   | 5.576470588 | 0        |
| TPD52L2         | 6,246  | 26.88 | 79.83  | 2.969866071 | 0        |
| TPI1            | 1.22   | 28.46 | 190.57 | 6.696064652 | 0        |
| TPM3            | 4,401  | 35.13 | 83.96  | 2.389980074 | 0        |
| TPMT            | 3.25   | 0.22  | 1.79   | 8.136363636 | 4.64E-12 |
| TPP1            | 3,498  | 33.54 | 121.01 | 3.607930829 | 0        |
| TPX2            | 3,662  | 3.11  | 24.36  | 7.832797428 | 0        |
| TRA16           | 1,299  | 1.45  | 11.80  | 8.137931034 | 0        |

|              |        |       |        |             |          |
|--------------|--------|-------|--------|-------------|----------|
| TRAC         | 0.954  | 4.98  | 16.33  | 3.279116466 | 1.00E-15 |
| TRADD        | 2.44   | 1.09  | 10.95  | 10.04587156 | 0        |
| TRAF2        | 2,277  | 2.87  | 7.62   | 2.655052265 | 1.85E-13 |
| TRAF3IP1     | 2,535  | 0.90  | 4.19   | 4.655555556 | 5.00E-15 |
| TRAF3IP3     | 2,058  | 3.75  | 23.05  | 6.146666667 | 0        |
| TRAF7        | 5.49   | 6.68  | 17.94  | 2.685628743 | 0        |
| TRAFD1       | 2.62   | 11.03 | 24.18  | 2.192203083 | 0        |
| TRAIP        | 2,024  | 0.98  | 4.21   | 4.295918367 | 1.20E-11 |
| TRAM2        | 7,057  | 8.03  | 19.18  | 2.388542964 | 0        |
| TRAPPC1      | 0.813  | 17.28 | 140.81 | 8.148726852 | 0        |
| TRAPPC2L     | 0.629  | 11.32 | 37.76  | 3.335689046 | 0        |
| TRAPPC3      | 1,262  | 14.66 | 40.31  | 2.749658936 | 0        |
| TRAPPC6A     | 0.795  | 22.77 | 48.11  | 2.112867809 | 0        |
| TRBV20-1     | 0.67   | 2.95  | 18.82  | 6.379661017 | 0        |
| TREX1        | 7,374  | 2.08  | 4.48   | 2.153846154 | 0        |
| TRFP         | 2,478  | 2.12  | 8.40   | 3.962264151 | 0        |
| TRIM14       | 8,165  | 3.08  | 8.00   | 2.597402597 | 0        |
| TRIM16       | 2,901  | 0.58  | 20.38  | 35.13793103 | 0        |
| TRIM2        | 6,731  | 0.49  | 1.77   | 3.612244898 | 1.17E-13 |
| TRIM21       | 1,929  | 4.67  | 12.01  | 2.571734475 | 0        |
| TRIM25       | 5,744  | 4.92  | 11.43  | 2.323170732 | 0        |
| TRIM28       | 2,959  | 56.34 | 149.00 | 2.644657437 | 0        |
| TRIM34       | 3,216  | 0.49  | 2.57   | 5.244897959 | 1.64E-13 |
| TRIM35       | 4,227  | 1.45  | 4.40   | 3.034482759 | 0        |
| TRIM5        | 4,162  | 2.26  | 6.32   | 2.796460177 | 0        |
| TRIM65       | 3,409  | 1.63  | 4.84   | 2.969325153 | 9.00E-15 |
| TRIM68       | 3.3    | 1.32  | 4.11   | 3.113636364 | 4.72E-13 |
| TRIM6-TRIM34 | 3.46   | 0.43  | 2.07   | 4.813953488 | 6.45E-11 |
| TRIM9        | 6,675  | 0.04  | 1.68   | 42          | 0        |
| TRIOBP       | 10,735 | 1.74  | 4.57   | 2.626436782 | 0        |
| TRIP11       | 6,453  | 0.85  | 2.12   | 2.494117647 | 5.01E-10 |
| TROAP        | 2,527  | 0.94  | 8.36   | 8.893617021 | 0        |
| TRPM2        | 7,269  | 6.69  | 34.00  | 5.082212257 | 0        |
| TRPT1        | 1,222  | 6.96  | 14.47  | 2.079022989 | 3.83E-09 |
| TRPV2        | 2,776  | 3.85  | 8.92   | 2.316883117 | 4.00E-15 |
| TRUB2        | 1,439  | 3.30  | 20.32  | 6.157575758 | 0        |
| TSC22D4      | 9,139  | 33.27 | 141.63 | 4.256988278 | 0        |



|         |        |       |        |             |          |
|---------|--------|-------|--------|-------------|----------|
| TSEN2   | 2,359  | 0.21  | 2.40   | 11.42857143 | 5.86E-13 |
| TSEN34  | 1,349  | 3.88  | 13.99  | 3.605670103 | 0        |
| TSEN54  | 1,905  | 1.92  | 14.41  | 7.505208333 | 0        |
| TSGA14  | 7,052  | 0.12  | 1.83   | 15.25       | 0        |
| TSPAN17 | 4,207  | 2.03  | 6.02   | 2.965517241 | 0        |
| TSPAN31 | 1.74   | 2.39  | 13.51  | 5.652719665 | 0        |
| TSPAN7  | 1,798  | 27.18 | 106.21 | 3.907652686 | 0        |
| TSR1    | 4.89   | 2.95  | 7.49   | 2.538983051 | 0        |
| TSSC1   | 1,664  | 18.08 | 40.45  | 2.237278761 | 0        |
| TST     | 1,128  | 7.55  | 16.58  | 2.19602649  | 9.75E-11 |
| TTC1    | 1,407  | 3.72  | 26.52  | 7.129032258 | 0        |
| TTC15   | 2,524  | 3.69  | 19.86  | 5.382113821 | 0        |
| TTC24   | 1,969  | 1.96  | 15.89  | 8.107142857 | 0        |
| TTC27   | 2,876  | 1.62  | 6.91   | 4.265432099 | 0        |
| TTC28   | 11,653 | 1.06  | 3.99   | 3.764150943 | 0        |
| TTC31   | 3,356  | 3.83  | 9.48   | 2.475195822 | 0        |
| TTC4    | 1,985  | 1.44  | 10.40  | 7.222222222 | 0        |
| TTC5    | 1,845  | 1.18  | 6.76   | 5.728813559 | 0        |
| TTC7B   | 3,434  | 1.30  | 4.04   | 3.107692308 | 2.82E-13 |
| TTC9C   | 1,139  | 3.22  | 15.53  | 4.822981366 | 0        |
| TTF2    | 4,855  | 0.77  | 4.89   | 6.350649351 | 0        |
| TTK     | 2,968  | 0.57  | 2.24   | 3.929824561 | 1.17E-08 |
| TTL     | 4,443  | 1.91  | 6.89   | 3.607329843 | 0        |
| TTLL1   | 2,043  | 0.24  | 4.00   | 16.66666667 | 0        |
| TTLL12  | 3,353  | 1.21  | 19.07  | 15.76033058 | 0        |
| TTLL4   | 4,191  | 0.57  | 2.75   | 4.824561404 | 0        |
| TTLL5   | 4,684  | 2.90  | 6.96   | 2.4         | 0        |
| TUBA1B  | 1,753  | 70.15 | 257.66 | 3.672986458 | 0        |
| TUBA1C  | 1,553  | 7.78  | 43.78  | 5.627249357 | 0        |
| TUBA8   | 2,018  | 1.27  | 66.92  | 52.69291339 | 0        |
| TUBB    | 7,462  | 0.60  | 2.84   | 4.733333333 | 0        |
| TUBB2C  | 1,591  | 29.72 | 105.10 | 3.536339166 | 0        |
| TUBG1   | 1,611  | 1.04  | 15.01  | 14.43269231 | 0        |
| TWF2    | 1,625  | 9.93  | 39.35  | 3.962739174 | 0        |
| TXLNA   | 4,796  | 2.91  | 23.66  | 8.130584192 | 0        |
| TXN2    | 1,336  | 22.07 | 67.09  | 3.039873131 | 0        |
| TXNDC1  | 2,443  | 2.84  | 8.17   | 2.876760563 | 0        |

|         |        |       |        |             |          |
|---------|--------|-------|--------|-------------|----------|
| TXNDC12 | 1.6    | 11.44 | 24.43  | 2.13548951  | 0        |
| TXNDC5  | 3.33   | 6.09  | 26.05  | 4.277504105 | 0        |
| TXNL2   | 1,902  | 4.84  | 11.12  | 2.297520661 | 7.24E-13 |
| TXNL4A  | 1,387  | 13.48 | 32.07  | 2.379080119 | 0        |
| TXNL5   | 0.727  | 4.77  | 16.11  | 3.377358491 | 1.39E-12 |
| TXNRD1  | 4,068  | 4.69  | 11.89  | 2.535181237 | 0        |
| TYMS    | 1,529  | 14.95 | 56.30  | 3.765886288 | 0        |
| TYSND1  | 5,967  | 0.60  | 3.54   | 5.9         | 0        |
| U2AF2   | 3,218  | 21.40 | 108.31 | 5.061214953 | 0        |
| UBA52P1 | 0.95   | 5.11  | 14.09  | 2.757338552 | 4.19E-11 |
| UBADC1  | 1,867  | 4.88  | 17.01  | 3.485655738 | 0        |
| UBE1    | 4,786  | 32.00 | 109.57 | 3.4240625   | 0        |
| UBE1DC1 | 3,496  | 2.86  | 6.09   | 2.129370629 | 3.22E-11 |
| UBE2C   | 2,411  | 0.78  | 16.77  | 21.5        | 0        |
| UBE2E2  | 1.51   | 2.62  | 9.65   | 3.683206107 | 0        |
| UBE2G1  | 4,332  | 5.62  | 12.07  | 2.147686833 | 0        |
| UBE2J2  | 2,609  | 9.37  | 19.76  | 2.108858058 | 0        |
| UBE2L3  | 5,536  | 4.93  | 17.79  | 3.60851927  | 0        |
| UBE2L6  | 1,579  | 14.03 | 65.30  | 4.654312188 | 0        |
| UBE2M   | 1,516  | 8.68  | 43.40  | 5           | 0        |
| UBE2MP1 | 0.961  | 2.06  | 12.45  | 6.04368932  | 0        |
| UBE2O   | 5,322  | 3.87  | 17.68  | 4.568475452 | 0        |
| UBE2Q1  | 3,221  | 11.31 | 31.54  | 2.788682582 | 0        |
| UBE2S   | 0.881  | 5.61  | 36.81  | 6.561497326 | 0        |
| UBE2SP1 | 0.881  | 1.69  | 10.52  | 6.224852071 | 1.00E-15 |
| UBE2T   | 0.898  | 0.66  | 14.26  | 21.60606061 | 0        |
| UBE2V1  | 3,173  | 7.89  | 24.02  | 3.044359949 | 0        |
| UBE2V2  | 1,524  | 1.89  | 10.72  | 5.671957672 | 0        |
| UBE2Z   | 2.99   | 16.91 | 34.46  | 2.037847428 | 0        |
| UBE3B   | 5,861  | 2.76  | 6.99   | 2.532608696 | 0        |
| UBE3C   | 10,336 | 0.95  | 3.69   | 3.884210526 | 0        |
| UBIAD1  | 1,489  | 3.25  | 11.96  | 3.68        | 0        |
| UBL4A   | 2,305  | 0.52  | 12.50  | 24.03846154 | 0        |
| UBL5    | 0.663  | 37.90 | 103.18 | 2.722427441 | 0        |
| UBL7    | 1,499  | 15.31 | 54.28  | 3.545395167 | 0        |
| UBQLN4  | 3,507  | 2.14  | 22.38  | 10.45794393 | 0        |
| UBQLN4P | 3,574  | 1.52  | 5.07   | 3.335526316 | 0        |

|         |       |       |        |             |          |
|---------|-------|-------|--------|-------------|----------|
| UBTD1   | 1,557 | 0.32  | 4.66   | 14.5625     | 0        |
| UBTD2   | 1,113 | 1.87  | 7.65   | 4.090909091 | 3.08E-11 |
| UBTF    | 4,198 | 17.35 | 49.70  | 2.864553314 | 0        |
| UBXD6   | 1,441 | 1.44  | 5.03   | 3.493055556 | 1.57E-08 |
| UCHL5IP | 1,891 | 1.83  | 7.04   | 3.846994536 | 1.00E-15 |
| UCK2    | 1.25  | 2.77  | 11.76  | 4.245487365 | 0        |
| UCP2    | 3,479 | 41.15 | 195.95 | 4.761846902 | 0        |
| UCRC    | 1,861 | 8.51  | 27.02  | 3.175088132 | 0        |
| UGDH    | 3,189 | 0.21  | 3.54   | 16.85714286 | 0        |
| UGT3A2  | 2,341 | 0.38  | 15.22  | 40.05263158 | 0        |
| UHRF1   | 3,816 | 5.11  | 89.40  | 17.49510763 | 0        |
| UMPS    | 2,246 | 2.34  | 9.22   | 3.94017094  | 0        |
| UNC119  | 2,523 | 5.17  | 16.56  | 3.203094778 | 0        |
| UNC45A  | 4,393 | 4.05  | 23.82  | 5.881481481 | 0        |
| UNC84B  | 4,961 | 56.79 | 133.92 | 2.358161648 | 0        |
| UNC93B1 | 2,315 | 9.10  | 34.70  | 3.813186813 | 0        |
| UNG     | 2,473 | 1.72  | 11.89  | 6.912790698 | 0        |
| UNQ501  | 1.03  | 5.09  | 17.91  | 3.518664047 | 0        |
| UNQ5783 | 0.916 | 2.81  | 35.69  | 12.70106762 | 0        |
| UQCR    | 1,266 | 20.16 | 46.44  | 2.303571429 | 0        |
| UQCRC1  | 1,617 | 22.40 | 65.69  | 2.932589286 | 0        |
| UQCRC2  | 2,092 | 46.63 | 107.68 | 2.309242977 | 0        |
| UROD    | 1,383 | 20.25 | 53.84  | 2.658765432 | 0        |
| UROS    | 1,279 | 9.90  | 64.80  | 6.545454545 | 0        |
| URP2    | 3,087 | 9.26  | 38.31  | 4.137149028 | 0        |
| USF2    | 2,734 | 40.06 | 121.30 | 3.027958063 | 0        |
| USP11   | 4,014 | 18.61 | 49.19  | 2.643202579 | 0        |
| USP13   | 2,717 | 0.59  | 3.11   | 5.271186441 | 1.94E-13 |
| USP18   | 2,037 | 0.78  | 19.80  | 25.38461538 | 0        |
| USP40   | 3,505 | 1.75  | 4.17   | 2.382857143 | 7.37E-10 |
| USP41   | 1,949 | 0.30  | 8.99   | 29.96666667 | 0        |
| USP5    | 3,103 | 5.04  | 25.77  | 5.113095238 | 0        |
| UST     | 4,197 | 0.36  | 2.63   | 7.305555556 | 0        |
| UTP14A  | 2,488 | 4.97  | 14.46  | 2.90945674  | 0        |
| UTP14C  | 5,494 | 1.60  | 4.11   | 2.56875     | 0        |
| UTP18   | 1,873 | 4.86  | 10.17  | 2.092592593 | 5.99E-10 |
| VAC14   | 3,096 | 4.12  | 8.92   | 2.165048544 | 7.00E-15 |

|          |        |        |         |             |          |
|----------|--------|--------|---------|-------------|----------|
| VAMP5    | 0.665  | 79.15  | 199.76  | 2.52381554  | 0        |
| VAMP8    | 0.671  | 52.05  | 130.56  | 2.508357349 | 0        |
| VANGL1   | 8,691  | 0.12   | 2.54    | 21.16666667 | 0        |
| VARS     | 10,677 | 1.83   | 9.62    | 5.256830601 | 0        |
| VASH1    | 5,728  | 2.52   | 21.77   | 8.638888889 | 0        |
| VASP     | 3,328  | 3.03   | 28.98   | 9.564356436 | 0        |
| VAT1     | 2,694  | 8.85   | 32.49   | 3.671186441 | 0        |
| VAV1     | 2,888  | 6.61   | 31.32   | 4.73827534  | 0        |
| VCAN     | 11,185 | 0.61   | 4.69    | 7.68852459  | 0        |
| VCP      | 3,189  | 18.55  | 40.57   | 2.187061995 | 0        |
| VDAC1    | 1,806  | 20.16  | 56.86   | 2.820436508 | 0        |
| VDAC3    | 1,386  | 8.28   | 31.12   | 3.758454106 | 0        |
| VDP      | 3,891  | 3.48   | 10.33   | 2.968390805 | 0        |
| VEGFB    | 1,385  | 17.57  | 44.83   | 2.551508253 | 0        |
| VENTX    | 2,411  | 2.59   | 7.34    | 2.833976834 | 6.00E-15 |
| VGLL4    | 3,542  | 9.47   | 22.73   | 2.400211193 | 0        |
| VIPR2    | 7,889  | 2.58   | 5.50    | 2.131782946 | 0        |
| VKORC1   | 1,487  | 5.32   | 47.30   | 8.890977444 | 0        |
| VKORC1L1 | 2,296  | 0.47   | 3.56    | 7.574468085 | 0        |
| VNN2     | 2.17   | 1.46   | 5.24    | 3.589041096 | 7.20E-13 |
| VPREB1   | 0.72   | 237.18 | 1170.49 | 4.935028249 | 0        |
| VPREB3   | 0.545  | 54.28  | 436.79  | 8.046978629 | 0        |
| VPS25    | 1,101  | 6.29   | 34.65   | 5.508744038 | 0        |
| VPS26B   | 4,785  | 22.21  | 52.09   | 2.345339937 | 0        |
| VPS35    | 3,233  | 5.11   | 17.51   | 3.426614481 | 0        |
| VPS37A   | 2.02   | 1.08   | 5.05    | 4.675925926 | 1.10E-14 |
| VPS41    | 11,376 | 0.88   | 2.08    | 2.363636364 | 8.00E-15 |
| VPS45    | 2,817  | 2.43   | 11.30   | 4.650205761 | 0        |
| VPS72    | 1,324  | 3.66   | 41.93   | 11.45628415 | 0        |
| VRK1     | 1,703  | 4.12   | 12.02   | 2.917475728 | 0        |
| VRK3     | 2.1    | 2.36   | 17.49   | 7.411016949 | 0        |
| VTI1B    | 1,277  | 6.35   | 20.39   | 3.211023622 | 0        |
| VWA1     | 3.7    | 1.10   | 7.76    | 7.054545455 | 0        |
| WARS     | 3,182  | 5.29   | 15.72   | 2.971644612 | 0        |
| WAS      | 1,805  | 20.11  | 53.30   | 2.650422675 | 0        |
| WASF1    | 3.22   | 2.00   | 11.01   | 5.505       | 0        |
| WBP2     | 1,857  | 21.79  | 49.35   | 2.264800367 | 0        |

|         |       |       |        |             |          |
|---------|-------|-------|--------|-------------|----------|
| WBSCR16 | 4,756 | 2.21  | 5.67   | 2.56561086  | 0        |
| WBSCR23 | 5,236 | 2.82  | 17.70  | 6.276595745 | 0        |
| WDR12   | 1.72  | 1.38  | 7.49   | 5.427536232 | 0        |
| WDR18   | 1,551 | 5.04  | 23.90  | 4.742063492 | 0        |
| WDR21A  | 2,665 | 1.23  | 3.82   | 3.105691057 | 5.20E-10 |
| WDR23   | 4,474 | 3.98  | 14.02  | 3.522613065 | 0        |
| WDR25   | 2,004 | 0.64  | 3.45   | 5.390625    | 3.11E-11 |
| WDR3    | 3,858 | 0.72  | 6.90   | 9.583333333 | 0        |
| WDR34   | 1,818 | 9.47  | 26.83  | 2.833157339 | 0        |
| WDR40A  | 3,631 | 1.99  | 8.33   | 4.185929648 | 0        |
| WDR41   | 2,558 | 3.06  | 6.25   | 2.04248366  | 3.82E-08 |
| WDR5    | 3,241 | 3.39  | 14.60  | 4.306784661 | 0        |
| WDR51A  | 1,889 | 0.73  | 6.82   | 9.342465753 | 0        |
| WDR51B  | 2,971 | 1.13  | 3.91   | 3.460176991 | 6.67E-13 |
| WDR54   | 1,119 | 3.27  | 13.62  | 4.165137615 | 0        |
| WDR57   | 1,488 | 8.25  | 27.34  | 3.313939394 | 0        |
| WDR6    | 4.07  | 26.62 | 54.98  | 2.065364388 | 0        |
| WDR61   | 1,191 | 7.47  | 26.31  | 3.522088353 | 0        |
| WDR67   | 3,502 | 0.31  | 2.14   | 6.903225806 | 7.30E-14 |
| WDR68   | 6,564 | 5.65  | 22.03  | 3.899115044 | 0        |
| WDR7    | 7,282 | 0.72  | 1.84   | 2.555555556 | 4.74E-10 |
| WDR70   | 2,122 | 4.71  | 11.79  | 2.503184713 | 0        |
| WDR77   | 2,408 | 2.18  | 20.26  | 9.293577982 | 0        |
| WDR79   | 1,834 | 2.11  | 8.46   | 4.009478673 | 0        |
| WDR8    | 1,657 | 3.47  | 8.69   | 2.504322767 | 2.34E-10 |
| WDR89   | 3.22  | 1.29  | 3.22   | 2.496124031 | 7.27E-08 |
| WDSOF1  | 2,161 | 4.26  | 13.60  | 3.192488263 | 0        |
| WDTC1   | 4,275 | 10.11 | 27.80  | 2.74975272  | 0        |
| WIBG    | 1,226 | 5.56  | 22.12  | 3.978417266 | 0        |
| WIPF1   | 5,079 | 29.92 | 105.48 | 3.52540107  | 0        |
| WIZ     | 6,066 | 3.87  | 9.32   | 2.408268734 | 0        |
| WRB     | 1,327 | 0.90  | 6.53   | 7.255555556 | 0        |
| WRNIP1  | 2,986 | 9.68  | 22.09  | 2.282024793 | 0        |
| WSB2    | 2,822 | 7.15  | 21.88  | 3.06013986  | 0        |
| WT1     | 3,113 | 0.06  | 2.63   | 43.83333333 | 0        |
| WWC3    | 7,517 | 10.74 | 34.98  | 3.25698324  | 0        |
| XAB1    | 1,794 | 13.40 | 28.45  | 2.123134328 | 0        |

|         |       |        |        |             |          |
|---------|-------|--------|--------|-------------|----------|
| XAF1    | 3,626 | 1.72   | 6.15   | 3.575581395 | 0        |
| XBP1    | 1.82  | 129.06 | 480.33 | 3.721757322 | 0        |
| XKR4    | 3,913 | 0.12   | 1.85   | 15.41666667 | 0        |
| XKR8    | 2,158 | 3.95   | 8.01   | 2.027848101 | 1.23E-08 |
| XLKD1   | 2,413 | 0.00   | 7.50   | 7.50        | 0        |
| XPC     | 3,691 | 4.96   | 12.08  | 2.435483871 | 0        |
| XPO5    | 5,212 | 1.56   | 7.58   | 4.858974359 | 0        |
| XPOT    | 3,868 | 2.28   | 8.10   | 3.552631579 | 0        |
| XRCC1   | 2,087 | 10.76  | 26.23  | 2.437732342 | 0        |
| XRCC5   | 3,304 | 29.73  | 65.01  | 2.186680121 | 0        |
| XRCC6   | 2,133 | 42.02  | 128.07 | 3.047834365 | 0        |
| XTP3TPA | 1.12  | 6.36   | 31.51  | 4.954402516 | 0        |
| XYLT1   | 5,254 | 5.33   | 16.94  | 3.178236398 | 0        |
| XYLT2   | 3,567 | 2.08   | 9.64   | 4.634615385 | 0        |
| YBX1    | 2.94  | 64.41  | 192.06 | 2.981835119 | 0        |
| YIF1A   | 1,055 | 3.28   | 26.75  | 8.155487805 | 0        |
| YIF1B   | 1,814 | 6.38   | 22.99  | 3.603448276 | 0        |
| YIPF1   | 1,804 | 2.85   | 12.05  | 4.228070175 | 0        |
| YIPF2   | 1,504 | 10.39  | 22.24  | 2.140519731 | 0        |
| YIPF3   | 1.95  | 28.01  | 64.24  | 2.293466619 | 0        |
| YWHAB   | 4,008 | 17.38  | 82.47  | 4.745109321 | 0        |
| ZADH1   | 2,538 | 0.62   | 3.92   | 6.322580645 | 0        |
| ZBED3   | 1,669 | 4.80   | 12.41  | 2.585416667 | 4.00E-15 |
| ZBTB38  | 8,113 | 0.46   | 1.27   | 2.760869565 | 3.61E-09 |
| ZBTB45  | 2,352 | 2.23   | 5.27   | 2.3632287   | 2.08E-08 |
| ZBTB8OS | 0.717 | 4.01   | 12.10  | 3.017456359 | 1.26E-08 |
| ZC3H13  | 6,409 | 3.63   | 16.52  | 4.550964187 | 0        |
| ZC3H14  | 5,312 | 2.37   | 6.53   | 2.755274262 | 0        |
| ZC3H7B  | 5,868 | 14.68  | 29.67  | 2.021117166 | 0        |
| ZC3HC1  | 3,828 | 1.79   | 4.62   | 2.581005587 | 3.76E-13 |
| ZCD1    | 0.898 | 0.99   | 7.51   | 7.585858586 | 3.48E-13 |
| ZCD2    | 1,583 | 3.19   | 7.77   | 2.435736677 | 7.23E-09 |
| ZDHHC12 | 1,152 | 11.42  | 34.08  | 2.984238179 | 0        |
| ZDHHC16 | 2,189 | 1.45   | 15.05  | 10.37931034 | 0        |
| ZDHHC2  | 3,817 | 1.48   | 3.90   | 2.635135135 | 1.54E-11 |
| ZDHHC3  | 2.72  | 4.40   | 14.74  | 3.35        | 0        |
| ZDHHC8  | 3,455 | 6.10   | 12.87  | 2.109836066 | 0        |

|          |        |       |       |             |          |
|----------|--------|-------|-------|-------------|----------|
| ZDHHC9   | 3,168  | 2.60  | 7.95  | 3.057692308 | 0        |
| ZFAT1    | 8,024  | 0.80  | 2.45  | 3.0625      | 0        |
| ZFP161   | 2,896  | 1.75  | 4.04  | 2.308571429 | 1.06E-07 |
| ZFP36L1  | 3,022  | 17.81 | 49.95 | 2.804604155 | 0        |
| ZFP41    | 4,786  | 0.58  | 1.86  | 3.206896552 | 2.73E-09 |
| ZFP64    | 5,218  | 0.32  | 2.49  | 7.78125     | 0        |
| ZFYVE19  | 1,784  | 4.88  | 9.96  | 2.040983607 | 9.04E-09 |
| ZFYVE21  | 1,383  | 1.22  | 6.15  | 5.040983607 | 5.97E-13 |
| ZHX2     | 4,359  | 7.13  | 26.53 | 3.720897616 | 0        |
| ZKSCAN1  | 10,988 | 2.20  | 6.05  | 2.75        | 0        |
| ZMAT3    | 2,794  | 2.09  | 14.09 | 6.741626794 | 0        |
| ZMAT5    | 1,033  | 5.46  | 20.22 | 3.703296703 | 0        |
| ZMPSTE24 | 3,103  | 3.00  | 7.27  | 2.423333333 | 8.00E-15 |
| ZMYM3    | 5,585  | 2.94  | 15.67 | 5.329931973 | 0        |
| ZMYM4    | 6,994  | 3.66  | 7.68  | 2.098360656 | 0        |
| ZMYND11  | 4,544  | 3.57  | 10.62 | 2.974789916 | 0        |
| ZMYND19  | 1.37   | 3.83  | 14.27 | 3.725848564 | 0        |
| ZNF142   | 6,234  | 2.40  | 5.27  | 2.195833333 | 0        |
| ZNF143   | 2,487  | 1.75  | 4.98  | 2.845714286 | 7.61E-11 |
| ZNF202   | 4,055  | 1.12  | 3.31  | 2.955357143 | 2.11E-12 |
| ZNF213   | 3,202  | 1.45  | 8.10  | 5.586206897 | 0        |
| ZNF28    | 4,675  | 0.66  | 2.12  | 3.212121212 | 2.76E-10 |
| ZNF32    | 1,279  | 10.29 | 22.20 | 2.157434402 | 6.00E-15 |
| ZNF320   | 6,145  | 0.86  | 2.59  | 3.011627907 | 1.20E-14 |
| ZNF358   | 1,882  | 9.62  | 25.55 | 2.655925156 | 0        |
| ZNF385   | 2,404  | 5.93  | 15.56 | 2.623946037 | 0        |
| ZNF41    | 3,533  | 0.42  | 1.93  | 4.595238095 | 6.94E-10 |
| ZNF414   | 1,178  | 3.44  | 9.23  | 2.683139535 | 4.67E-09 |
| ZNF423   | 4,818  | 6.61  | 24.27 | 3.671709531 | 0        |
| ZNF428   | 1,387  | 29.10 | 59.15 | 2.032646048 | 0        |
| ZNF444   | 2,043  | 4.99  | 16.86 | 3.378757515 | 0        |
| ZNF45    | 3,153  | 1.07  | 2.97  | 2.775700935 | 2.35E-08 |
| ZNF473   | 4,761  | 0.44  | 2.94  | 6.681818182 | 0        |
| ZNF497   | 3,466  | 0.92  | 2.80  | 3.043478261 | 1.28E-09 |
| ZNF511   | 1.08   | 4.04  | 15.91 | 3.938118812 | 0        |
| ZNF512   | 3,426  | 6.96  | 16.25 | 2.334770115 | 0        |
| ZNF524   | 1,109  | 2.76  | 12.92 | 4.68115942  | 0        |

|        |       |       |       |             |          |
|--------|-------|-------|-------|-------------|----------|
| ZNF553 | 2,203 | 1.12  | 5.69  | 5.080357143 | 0        |
| ZNF559 | 3,042 | 0.81  | 3.24  | 4           | 5.27E-13 |
| ZNF593 | 0,621 | 9.56  | 25.64 | 2.682008368 | 1.18E-12 |
| ZNF594 | 4,863 | 0.12  | 1.96  | 16.33333333 | 0        |
| ZNF607 | 4,352 | 0.22  | 1.80  | 8.181818182 | 0        |
| ZNF608 | 5,645 | 4.69  | 12.28 | 2.618336887 | 0        |
| ZNF609 | 8,618 | 2.17  | 11.12 | 5.124423963 | 0        |
| ZNF616 | 3,047 | 0.39  | 2.05  | 5.256410256 | 3.43E-10 |
| ZNF628 | 3,843 | 1.16  | 3.95  | 3.405172414 | 1.00E-15 |
| ZNF638 | 6,615 | 3.66  | 10.83 | 2.959016393 | 0        |
| ZNF641 | 2,326 | 1.02  | 3.59  | 3.519607843 | 1.03E-09 |
| ZNF646 | 6,183 | 1.86  | 6.12  | 3.290322581 | 0        |
| ZNF664 | 5,108 | 3.29  | 8.52  | 2.589665653 | 0        |
| ZNF668 | 2,625 | 3.32  | 12.83 | 3.864457831 | 0        |
| ZNF672 | 2,936 | 12.87 | 32.85 | 2.552447552 | 0        |
| ZNF673 | 2,292 | 3.28  | 7.28  | 2.219512195 | 8.76E-10 |
| ZNF692 | 1,931 | 2.46  | 11.00 | 4.471544715 | 0        |
| ZNF71  | 3,105 | 0.77  | 3.53  | 4.584415584 | 2.00E-15 |
| ZNF710 | 3,082 | 1.16  | 4.67  | 4.025862069 | 0        |
| ZNF74  | 3,758 | 0.29  | 5.11  | 17.62068966 | 0        |
| ZNF740 | 2,352 | 4.29  | 12.47 | 2.906759907 | 0        |
| ZNF747 | 2,371 | 1.71  | 4.99  | 2.918128655 | 1.05E-10 |
| ZNF76  | 2,653 | 4.84  | 10.13 | 2.092975207 | 1.17E-13 |
| ZNF768 | 2,312 | 9.88  | 24.56 | 2.48582996  | 0        |
| ZNF785 | 3,183 | 1.03  | 4.65  | 4.514563107 | 0        |
| ZNF792 | 3,284 | 0.87  | 2.74  | 3.149425287 | 1.82E-09 |
| ZNHIT1 | 2,378 | 6.99  | 23.42 | 3.350500715 | 0        |
| ZNRF1  | 4,633 | 0.64  | 22.77 | 35.578125   | 0        |
| ZP3    | 2.9   | 1.37  | 4.24  | 3.094890511 | 4.91E-12 |
| ZW10   | 2,884 | 1.51  | 4.33  | 2.867549669 | 5.17E-11 |
| ZWINT  | 3,591 | 3.23  | 10.34 | 3.20123839  | 0        |

#### Down-regulated genes

| Gene ID | Transcript length (kb) | Primary ALL RPKM | Relapse RPKM | Fold change  | Fisher's exact test raw p-value |
|---------|------------------------|------------------|--------------|--------------|---------------------------------|
| AAK1    | 3,228                  | 6.47             | 2.56         | -2.52734375  | 3.00E-15                        |
| AASS    | 6,466                  | 2.86             | 1.39         | -2.057553957 | 1.46E-09                        |



|          |        |       |       |              |          |
|----------|--------|-------|-------|--------------|----------|
| ABBA-1   | 4,977  | 77.69 | 7.24  | -10.73066298 | 0        |
| ABCA1    | 10,412 | 11.07 | 1.10  | -10.06363636 | 0        |
| ABCA11   | 50,692 | 0.71  | 0.27  | -2.62962963  | 0        |
| ABHD13   | 5,302  | 3.06  | 1.26  | -2.428571429 | 1.72E-11 |
| ABL2     | 3,967  | 5.54  | 0.93  | -5.956989247 | 0        |
| ABLIM1   | 8,391  | 13.26 | 2.99  | -4.434782609 | 0        |
| ACOT9    | 2,385  | 28.34 | 6.25  | -4.5344      | 0        |
| ACSL1    | 3,805  | 13.06 | 1.06  | -12.32075472 | 0        |
| ACVR2A   | 5,244  | 1.48  | 0.42  | -3.523809524 | 2.40E-09 |
| ADAM17   | 3,845  | 13.02 | 3.07  | -4.241042345 | 0        |
| ADAM9    | 5,896  | 3.36  | 0.65  | -5.169230769 | 0        |
| ADAMTSL4 | 4,477  | 7.45  | 3.13  | -2.380191693 | 0        |
| AFF1     | 10,094 | 61.42 | 7.40  | -8.3         | 0        |
| AFF4     | 10,012 | 33.83 | 2.83  | -11.9540636  | 0        |
| AGPS     | 3,824  | 28.54 | 13.53 | -2.109386548 | 0        |
| AHCTF1   | 8,744  | 9.97  | 2.10  | -4.747619048 | 0        |
| AHCTF1P  | 7,176  | 3.93  | 1.29  | -3.046511628 | 0        |
| AHNAK    | 19,263 | 30.19 | 11.88 | -2.541245791 | 0        |
| AHSA2    | 3.02   | 24.21 | 10.32 | -2.345930233 | 0        |
| AIM1     | 8,653  | 13.55 | 2.68  | -5.055970149 | 0        |
| AKAP10   | 2,917  | 5.60  | 2.71  | -2.066420664 | 9.23E-09 |
| AKAP12   | 9,449  | 16.89 | 1.35  | -12.51111111 | 0        |
| AKAP13   | 16,435 | 45.53 | 15.55 | -2.927974277 | 0        |
| AKAP2    | 6,866  | 8.14  | 3.19  | -2.551724138 | 0        |
| AKAP9    | 28,573 | 1.72  | 0.73  | -2.356164384 | 0        |
| ALOX5    | 5,046  | 26.78 | 9.86  | -2.716024341 | 0        |
| AMD1     | 3,895  | 42.98 | 16.91 | -2.541691307 | 0        |
| AMT      | 2,103  | 6.03  | 2.12  | -2.844339623 | 1.11E-11 |
| AMY2B    | 2,181  | 2.68  | 0.62  | -4.322580645 | 8.93E-09 |
| ANGPT2   | 2,227  | 8.67  | 0.68  | -12.75       | 0        |
| ANKRD11  | 21,966 | 27.03 | 10.30 | -2.624271845 | 0        |
| ANKRD12  | 9,036  | 6.81  | 1.99  | -3.422110553 | 0        |
| ANKRD13C | 3,009  | 6.71  | 2.35  | -2.855319149 | 0        |
| ANKRD28  | 6,805  | 9.96  | 4.53  | -2.198675497 | 0        |
| ANXA1    | 1,399  | 7.78  | 2.83  | -2.749116608 | 1.54E-09 |
| AP1G1    | 6.85   | 31.63 | 5.97  | -5.298157454 | 0        |
| APOLD1   | 4,569  | 51.47 | 1.44  | -35.74305556 | 0        |

|          |        |        |       |              |          |
|----------|--------|--------|-------|--------------|----------|
| ARFGEF1  | 8,312  | 9.19   | 4.55  | -2.01978022  | 0        |
| ARFGEF2  | 7.05   | 10.55  | 3.18  | -3.317610063 | 0        |
| ARG1     | 1,447  | 3.89   | 0.82  | -4.743902439 | 9.05E-09 |
| ARG2     | 1,981  | 8.14   | 3.40  | -2.394117647 | 4.29E-11 |
| ARHGAP12 | 4,172  | 9.06   | 2.44  | -3.713114754 | 0        |
| ARHGAP21 | 7,109  | 14.09  | 6.03  | -2.336650083 | 0        |
| ARHGAP24 | 5,651  | 12.22  | 5.56  | -2.197841727 | 0        |
| ARHGAP29 | 5,573  | 11.59  | 0.29  | -39.96551724 | 0        |
| ARHGEF18 | 5,345  | 19.70  | 8.26  | -2.384987893 | 0        |
| ARHGEF7  | 18,185 | 83.98  | 19.49 | -4.308876347 | 0        |
| ARID2    | 8,466  | 8.17   | 2.64  | -3.09469697  | 0        |
| ARID4A   | 5,187  | 17.09  | 3.25  | -5.258461538 | 0        |
| ARID4B   | 6,374  | 11.35  | 4.02  | -2.823383085 | 0        |
| ARID5A   | 5,392  | 175.50 | 76.54 | -2.292918735 | 0        |
| ARID5B   | 7,737  | 34.80  | 7.61  | -4.572930355 | 0        |
| ARIH1    | 4,911  | 37.77  | 12.44 | -3.036173633 | 0        |
| ARL4C    | 4,009  | 2.35   | 0.80  | -2.9375      | 4.41E-09 |
| ARL5B    | 3,589  | 2.65   | 0.24  | -11.04166667 | 0        |
| ARL6IP2  | 2,254  | 12.99  | 5.97  | -2.175879397 | 1.00E-15 |
| ARMCX3   | 3,838  | 14.64  | 5.97  | -2.452261307 | 0        |
| ARMCX4   | 3,833  | 3.95   | 1.01  | -3.910891089 | 0        |
| ARNTL    | 3,015  | 3.08   | 0.67  | -4.597014925 | 2.07E-13 |
| ARPP-19  | 5,978  | 27.30  | 10.15 | -2.689655172 | 0        |
| ARRDC2   | 3.32   | 109.15 | 28.40 | -3.843309859 | 0        |
| ASB16    | 2,139  | 11.38  | 1.26  | -9.031746032 | 0        |
| ASB8     | 2,799  | 14.43  | 6.77  | -2.131462334 | 0        |
| ASH1L    | 9,926  | 6.61   | 2.55  | -2.592156863 | 0        |
| ASPHD2   | 2,857  | 8.93   | 3.26  | -2.739263804 | 0        |
| ATAD2B   | 8,103  | 3.85   | 1.37  | -2.810218978 | 0        |
| ATAD5    | 6,245  | 1.96   | 0.66  | -2.96969697  | 8.65E-12 |
| ATF6     | 3,249  | 19.86  | 9.70  | -2.04742268  | 0        |
| ATF7IP   | 4,893  | 30.43  | 9.64  | -3.156639004 | 0        |
| ATG16L1  | 3,738  | 9.77   | 4.21  | -2.320665083 | 0        |
| ATG4D    | 1,896  | 25.30  | 9.07  | -2.789415656 | 0        |
| ATHL1    | 4,231  | 39.21  | 18.40 | -2.130978261 | 0        |
| ATP11B   | 7,524  | 11.19  | 4.59  | -2.437908497 | 0        |
| ATP6V1A  | 4,861  | 11.19  | 5.34  | -2.095505618 | 0        |

|          |        |        |       |              |          |
|----------|--------|--------|-------|--------------|----------|
| ATP8A2   | 3,904  | 1.80   | 0.35  | -5.142857143 | 1.35E-11 |
| ATXN3    | 4.64   | 3.96   | 1.39  | -2.848920863 | 0        |
| ATXN7    | 5,531  | 11.47  | 2.19  | -5.237442922 | 0        |
| AXIN2    | 4,259  | 5.90   | 0.42  | -14.04761905 | 0        |
| B4GALT4  | 2,344  | 8.27   | 1.84  | -4.494565217 | 0        |
| BAALC    | 6,555  | 24.39  | 6.60  | -3.695454545 | 0        |
| BACH1    | 6,731  | 7.67   | 3.45  | -2.223188406 | 0        |
| BACH2    | 11,225 | 7.64   | 2.99  | -2.555183946 | 0        |
| BAIAP2L2 | 2,707  | 5.56   | 1.43  | -3.888111888 | 0        |
| BAIAP3   | 4,523  | 2.52   | 0.54  | -4.666666667 | 0        |
| BARD1    | 3,477  | 13.97  | 1.03  | -13.5631068  | 0        |
| BASP1    | 1,797  | 4.40   | 1.31  | -3.358778626 | 3.42E-09 |
| BAZ2A    | 10,772 | 58.32  | 16.38 | -3.56043956  | 0        |
| BCAP29   | 17,418 | 3.19   | 1.06  | -3.009433962 | 0        |
| BCL10    | 2,786  | 4.33   | 1.27  | -3.409448819 | 3.55E-13 |
| BCL2L11  | 10,823 | 7.27   | 0.83  | -8.759036145 | 0        |
| BCL2L2   | 3.54   | 27.92  | 6.87  | -4.064046579 | 0        |
| BCL6     | 4,505  | 20.89  | 4.55  | -4.591208791 | 0        |
| BCL7A    | 6,696  | 69.93  | 34.92 | -2.00257732  | 0        |
| BMF      | 12,999 | 62.86  | 5.35  | -11.74953271 | 0        |
| BMP2     | 3.15   | 33.70  | 3.71  | -9.083557951 | 0        |
| BNIP3L   | 4,058  | 36.30  | 10.95 | -3.315068493 | 0        |
| BOAT     | 1,198  | 9.83   | 1.55  | -6.341935484 | 0        |
| BRAF     | 5,738  | 4.96   | 0.73  | -6.794520548 | 0        |
| BRAP     | 2,819  | 18.88  | 8.08  | -2.336633663 | 0        |
| BRCA2    | 11,386 | 0.60   | 0.16  | -3.75        | 3.89E-09 |
| BRD1     | 7,122  | 33.48  | 10.82 | -3.094269871 | 0        |
| BRF1     | 7,157  | 27.28  | 12.17 | -2.24157765  | 0        |
| BRUNOL6  | 3,399  | 4.11   | 1.68  | -2.446428571 | 3.19E-10 |
| BRWD1    | 18,593 | 5.70   | 1.25  | -4.56        | 0        |
| BRWD3    | 6,085  | 3.40   | 0.71  | -4.788732394 | 0        |
| BSDC1    | 4,873  | 26.43  | 12.22 | -2.162847791 | 0        |
| BTAF1    | 7,169  | 18.73  | 4.16  | -4.502403846 | 0        |
| BTBD3    | 5,251  | 10.31  | 4.70  | -2.193617021 | 0        |
| BTBD9    | 2,208  | 3.18   | 0.72  | -4.416666667 | 7.70E-11 |
| BTG1     | 1,782  | 167.39 | 47.65 | -3.512906611 | 0        |
| BTG3     | 1,353  | 9.95   | 0.81  | -12.28395062 | 0        |

|           |        |        |       |              |          |
|-----------|--------|--------|-------|--------------|----------|
| BTNL9     | 5,292  | 42.87  | 13.77 | -3.11328976  | 0        |
| C10orf110 | 0.893  | 20.17  | 2.17  | -9.294930876 | 0        |
| C10orf118 | 6,574  | 11.28  | 1.56  | -7.230769231 | 0        |
| C10orf12  | 4,545  | 2.46   | 0.41  | -6           | 0        |
| C10orf18  | 10,129 | 10.26  | 4.70  | -2.182978723 | 0        |
| C10orf28  | 3,315  | 10.24  | 3.76  | -2.723404255 | 0        |
| C10orf38  | 4,654  | 72.54  | 26.28 | -2.760273973 | 0        |
| C10orf46  | 5.49   | 11.31  | 2.21  | -5.117647059 | 0        |
| C10orf64  | 3,669  | 5.53   | 2.72  | -2.033088235 | 3.87E-10 |
| C10orf97  | 2,899  | 8.57   | 3.80  | -2.255263158 | 6.00E-15 |
| C11orf47  | 3,205  | 1.82   | 0.39  | -4.666666667 | 1.83E-09 |
| C12orf23  | 3,478  | 36.89  | 10.94 | -3.37202925  | 0        |
| C12orf30  | 5,781  | 7.70   | 2.10  | -3.666666667 | 0        |
| C12orf47  | 2,285  | 18.49  | 6.19  | -2.987075929 | 0        |
| C14orf103 | 5,566  | 9.53   | 2.70  | -3.52962963  | 0        |
| C14orf106 | 5,547  | 27.99  | 5.79  | -4.834196891 | 0        |
| C14orf118 | 4,087  | 12.27  | 3.12  | -3.932692308 | 0        |
| C14orf138 | 1,767  | 7.34   | 3.29  | -2.23100304  | 3.29E-08 |
| C14orf43  | 8,091  | 24.57  | 5.25  | -4.68        | 0        |
| C14orf49  | 3,868  | 14.12  | 6.24  | -2.262820513 | 0        |
| C16orf28  | 2,761  | 9.31   | 2.10  | -4.433333333 | 0        |
| C16orf72  | 11,537 | 29.44  | 5.09  | -5.78388998  | 0        |
| C17orf48  | 1,518  | 31.29  | 11.04 | -2.83423913  | 0        |
| C17orf65  | 2,413  | 22.71  | 9.87  | -2.300911854 | 0        |
| C18orf25  | 5,424  | 9.58   | 1.60  | -5.9875      | 0        |
| C19orf23  | 1,356  | 4.52   | 0.49  | -9.224489796 | 5.90E-14 |
| C1orf27   | 3,784  | 5.91   | 2.36  | -2.504237288 | 1.00E-15 |
| C1orf38   | 3.69   | 105.83 | 36.06 | -2.934830837 | 0        |
| C1orf52   | 1,532  | 13.56  | 6.25  | -2.1696      | 8.14E-12 |
| C1orf55   | 3,934  | 18.71  | 4.41  | -4.242630385 | 0        |
| C1orf69   | 8.15   | 7.69   | 1.82  | -4.225274725 | 0        |
| C1QTNF1   | 3.17   | 3.72   | 0.40  | -9.3         | 0        |
| C20orf106 | 0.905  | 5.80   | 0.47  | -12.34042553 | 3.16E-13 |
| C20orf111 | 3,841  | 44.09  | 8.95  | -4.926256983 | 0        |
| C20orf112 | 4,335  | 12.03  | 4.81  | -2.501039501 | 0        |
| C20orf133 | 5,513  | 4.60   | 0.81  | -5.679012346 | 0        |
| C20orf7   | 1,454  | 16.53  | 1.96  | -8.433673469 | 0        |

|           |        |       |       |              |          |
|-----------|--------|-------|-------|--------------|----------|
| C20orf77  | 6,472  | 18.71 | 4.04  | -4.631188119 | 0        |
| C21orf124 | 1,972  | 7.27  | 1.24  | -5.862903226 | 0        |
| C2orf49   | 1,119  | 7.78  | 2.57  | -3.027237354 | 8.25E-09 |
| C3orf17   | 5,905  | 12.03 | 4.09  | -2.941320293 | 0        |
| C3orf37   | 3,419  | 55.19 | 24.12 | -2.28814262  | 0        |
| C3orf38   | 1,367  | 12.52 | 4.44  | -2.81981982  | 7.00E-15 |
| C3orf52   | 2,221  | 9.36  | 1.10  | -8.509090909 | 0        |
| C4orf15   | 5.92   | 4.84  | 0.92  | -5.260869565 | 0        |
| C4orf19   | 4,731  | 20.31 | 0.13  | -156.2307692 | 0        |
| C4orf30   | 3.38   | 18.70 | 5.01  | -3.73253493  | 0        |
| C5AR1     | 2,321  | 5.20  | 0.43  | -12.09302326 | 0        |
| C5orf24   | 4,259  | 5.76  | 1.72  | -3.348837209 | 0        |
| C5orf26   | 1      | 51.75 | 23.75 | -2.178947368 | 0        |
| C6orf107  | 6,885  | 6.63  | 1.10  | -6.027272727 | 0        |
| C6orf113  | 2,197  | 6.53  | 1.53  | -4.267973856 | 0        |
| C6orf114  | 1,527  | 15.03 | 0.71  | -21.16901408 | 0        |
| C6orf120  | 4,146  | 9.83  | 3.88  | -2.533505155 | 0        |
| C6orf72   | 1,224  | 18.26 | 6.05  | -3.018181818 | 0        |
| C6orf81   | 1,169  | 6.18  | 1.08  | -5.722222222 | 1.32E-12 |
| C6orf85   | 5,415  | 15.73 | 2.98  | -5.27852349  | 0        |
| C7orf20   | 4,468  | 16.43 | 6.33  | -2.595576619 | 0        |
| C7orf23   | 2,574  | 11.95 | 5.49  | -2.176684882 | 0        |
| C7orf41   | 11.21  | 10.99 | 2.87  | -3.829268293 | 0        |
| C8orf38   | 2,402  | 8.44  | 3.99  | -2.115288221 | 5.78E-11 |
| C8orf61   | 1,862  | 15.41 | 1.95  | -7.902564103 | 0        |
| C9orf100  | 3,763  | 5.84  | 1.63  | -3.582822086 | 0        |
| C9orf72   | 4,435  | 2.28  | 0.09  | -25.33333333 | 0        |
| C9orf77   | 4,215  | 46.03 | 22.03 | -2.089423513 | 0        |
| C9orf91   | 3.91   | 19.89 | 9.26  | -2.147948164 | 0        |
| CA2       | 1,551  | 20.74 | 10.27 | -2.019474197 | 5.00E-15 |
| CABP7     | 2,982  | 15.16 | 5.03  | -3.013916501 | 0        |
| CAGE1     | 4,349  | 1.96  | 0.04  | -49          | 0        |
| CAPS      | 1,641  | 10.61 | 4.78  | -2.219665272 | 1.79E-10 |
| CASD1     | 7,634  | 2.79  | 0.92  | -3.032608696 | 0        |
| CASP12    | 13,287 | 1.77  | 0.06  | -29.5        | 0        |
| CASP8     | 4.34   | 34.88 | 6.35  | -5.492913386 | 0        |
| CAST      | 7,189  | 45.58 | 20.86 | -2.185043145 | 0        |

|          |        |        |       |              |          |
|----------|--------|--------|-------|--------------|----------|
| CASZ1    | 4,094  | 5.61   | 1.40  | -4.007142857 | 0        |
| CBLB     | 3,976  | 14.56  | 4.78  | -3.046025105 | 0        |
| CCDC17   | 1,873  | 7.23   | 0.99  | -7.303030303 | 0        |
| CCDC28A  | 1,496  | 19.78  | 9.41  | -2.102019129 | 4.00E-15 |
| CCDC35   | 4,862  | 1.77   | 0.38  | -4.657894737 | 2.04E-13 |
| CCDC45   | 3,501  | 25.92  | 6.01  | -4.31281198  | 0        |
| CCDC49   | 2.33   | 18.56  | 8.97  | -2.069119287 | 0        |
| CCDC6    | 5,704  | 32.65  | 5.41  | -6.035120148 | 0        |
| CCDC84   | 1,384  | 16.16  | 5.60  | -2.885714286 | 0        |
| CCDC88   | 4,915  | 7.49   | 3.24  | -2.311728395 | 0        |
| CCNL1    | 6,072  | 60.11  | 14.12 | -4.257082153 | 0        |
| CCNL2    | 7,216  | 18.79  | 6.68  | -2.812874251 | 0        |
| CCNT1    | 4,359  | 13.78  | 3.90  | -3.533333333 | 0        |
| CCNT2    | 8,578  | 10.46  | 2.38  | -4.394957983 | 0        |
| CCR7     | 2,173  | 6.60   | 1.94  | -3.402061856 | 1.00E-15 |
| CD109    | 6,407  | 7.83   | 2.38  | -3.289915966 | 0        |
| CD160    | 2,033  | 4.68   | 0.32  | -14.625      | 0        |
| CD177    | 2,426  | 5.38   | 2.33  | -2.309012876 | 1.22E-08 |
| CD247    | 3,438  | 9.81   | 2.03  | -4.832512315 | 0        |
| CD27     | 1,477  | 32.89  | 11.43 | -2.877515311 | 0        |
| CD2AP    | 4,644  | 5.28   | 2.61  | -2.022988506 | 6.46E-12 |
| CD47     | 14,066 | 20.18  | 9.62  | -2.097713098 | 0        |
| CD5      | 3,121  | 1.74   | 0.30  | -5.8         | 8.88E-10 |
| CD55     | 2,841  | 32.91  | 6.86  | -4.797376093 | 0        |
| CD6      | 3.23   | 2.39   | 0.63  | -3.793650794 | 4.33E-10 |
| CD7      | 1,283  | 5.63   | 1.11  | -5.072072072 | 4.52E-12 |
| CD83     | 3,132  | 21.48  | 1.94  | -11.07216495 | 0        |
| CD8A     | 2,202  | 4.27   | 1.45  | -2.944827586 | 2.17E-09 |
| CDC14A   | 5,221  | 2.81   | 0.42  | -6.69047619  | 0        |
| CDC42EP2 | 2.2    | 11.42  | 1.02  | -11.19607843 | 0        |
| CDC42EP3 | 5,508  | 42.07  | 9.32  | -4.513948498 | 0        |
| CDC42SE1 | 3,728  | 105.54 | 37.31 | -2.828732243 | 0        |
| CDC42SE2 | 3,657  | 40.69  | 13.86 | -2.935786436 | 0        |
| CDCA7L   | 6,474  | 25.91  | 9.63  | -2.690550363 | 0        |
| CDKN2D   | 1,447  | 45.06  | 14.38 | -3.133518776 | 0        |
| CDS2     | 9,104  | 79.22  | 34.04 | -2.327262045 | 0        |
| CEBPD    | 1,295  | 5.20   | 1.23  | -4.227642276 | 6.11E-10 |

|        |        |       |       |              |          |
|--------|--------|-------|-------|--------------|----------|
| CEBPG  | 3,736  | 8.13  | 3.93  | -2.06870229  | 4.00E-15 |
| CECR2  | 5,931  | 12.38 | 4.32  | -2.865740741 | 0        |
| CELSR1 | 11,389 | 1.07  | 0.13  | -8.230769231 | 0        |
| CENPC1 | 3,349  | 8.63  | 3.62  | -2.383977901 | 0        |
| CENTD1 | 7,771  | 14.92 | 2.63  | -5.673003802 | 0        |
| CEP350 | 12,701 | 10.36 | 2.06  | -5.029126214 | 0        |
| CERK   | 8,749  | 41.12 | 15.59 | -2.637588198 | 0        |
| CFLAR  | 2,213  | 13.68 | 5.69  | -2.404217926 | 0        |
| CHD1   | 6,457  | 28.41 | 4.42  | -6.42760181  | 0        |
| CHD2   | 15.83  | 58.12 | 11.96 | -4.859531773 | 0        |
| CHD5   | 10,303 | 1.13  | 0.02  | -56.5        | 0        |
| CHD6   | 10,807 | 12.44 | 3.98  | -3.125628141 | 0        |
| CHD7   | 11,443 | 28.97 | 4.20  | -6.897619048 | 0        |
| CHIC2  | 1,125  | 9.15  | 3.75  | -2.44        | 9.59E-08 |
| CHKA   | 7,978  | 45.64 | 18.60 | -2.453763441 | 0        |
| CHML   | 7,067  | 11.05 | 1.48  | -7.466216216 | 0        |
| CHPT1  | 2.7    | 43.17 | 8.55  | -5.049122807 | 0        |
| CHST2  | 3,043  | 36.45 | 10.52 | -3.464828897 | 0        |
| CICE   | 9,387  | 1.99  | 0.93  | -2.139784946 | 2.00E-10 |
| CIR    | 2,074  | 39.54 | 18.18 | -2.174917492 | 0        |
| CKAP4  | 2,915  | 22.94 | 7.28  | -3.151098901 | 0        |
| CLCF1  | 1,842  | 2.63  | 0.23  | -11.43478261 | 8.56E-12 |
| CLCN6  | 5,937  | 6.61  | 2.86  | -2.311188811 | 0        |
| CLDN12 | 6,938  | 1.34  | 0.50  | -2.68        | 3.28E-08 |
| CLDN5  | 1,699  | 10.25 | 0.45  | -22.77777778 | 0        |
| CLIC4  | 4.29   | 11.11 | 5.11  | -2.174168297 | 0        |
| CLINT1 | 4,474  | 54.75 | 14.78 | -3.704330176 | 0        |
| CLK1   | 4,148  | 70.60 | 12.53 | -5.634477255 | 0        |
| CLK4   | 2,869  | 12.18 | 4.64  | -2.625       | 0        |
| CLN8   | 4,817  | 12.18 | 1.09  | -11.17431193 | 0        |
| CLP1   | 2,432  | 10.45 | 3.81  | -2.742782152 | 0        |
| CLSTN3 | 3,187  | 6.36  | 2.91  | -2.18556701  | 1.45E-11 |
| CMTM4  | 10,887 | 1.63  | 0.48  | -3.395833333 | 0        |
| CNKSR3 | 5,713  | 66.66 | 2.53  | -26.34782609 | 0        |
| CNN3   | 2,032  | 71.76 | 9.37  | -7.658484525 | 0        |
| CNOT2  | 3.28   | 30.65 | 14.79 | -2.07234618  | 0        |
| CNOT4  | 9,014  | 3.55  | 1.15  | -3.086956522 | 0        |

|           |        |        |        |              |          |
|-----------|--------|--------|--------|--------------|----------|
| CNOT6L    | 5,886  | 34.59  | 9.18   | -3.767973856 | 0        |
| COCH      | 3,026  | 32.04  | 15.36  | -2.0859375   | 0        |
| COL5A1    | 9.38   | 14.17  | 6.96   | -2.03591954  | 0        |
| COL9A2    | 2,831  | 2.41   | 0.51   | -4.725490196 | 1.24E-10 |
| COPS2     | 1,947  | 22.61  | 10.08  | -2.243055556 | 0        |
| CORO6     | 1,844  | 4.45   | 1.56   | -2.852564103 | 1.03E-07 |
| COTL1     | 1,827  | 13.54  | 5.17   | -2.618955513 | 0        |
| COX19     | 7,215  | 7.42   | 2.86   | -2.594405594 | 0        |
| CPEB4     | 6,909  | 4.68   | 0.81   | -5.777777778 | 0        |
| CPM       | 7,862  | 23.48  | 4.51   | -5.206208426 | 0        |
| CRAMP1L   | 7,728  | 13.47  | 6.49   | -2.07550077  | 0        |
| CRBN      | 2,581  | 16.67  | 7.50   | -2.222666667 | 0        |
| CREB3L2   | 14,906 | 6.47   | 3.06   | -2.114379085 | 0        |
| CREB5     | 17,979 | 5.57   | 0.03   | -185.6666667 | 0        |
| CREBBP    | 9,032  | 38.14  | 15.25  | -2.500983607 | 0        |
| CREBZF    | 7,304  | 11.74  | 2.68   | -4.380597015 | 0        |
| CRIM1     | 16,492 | 40.62  | 10.65  | -3.814084507 | 0        |
| CRMP1     | 3,507  | 5.62   | 2.04   | -2.754901961 | 0        |
| CRSP3     | 5,713  | 10.83  | 2.63   | -4.117870722 | 0        |
| CRSP6     | 3,412  | 8.35   | 2.51   | -3.326693227 | 0        |
| CRSP7     | 3,184  | 8.27   | 3.31   | -2.498489426 | 0        |
| CRY1      | 2,985  | 16.54  | 5.75   | -2.876521739 | 0        |
| CRYGN     | 1,704  | 4.47   | 0.18   | -24.83333333 | 0        |
| CSAD      | 2,645  | 10.06  | 1.65   | -6.096969697 | 0        |
| CSDA      | 1,913  | 659.05 | 216.20 | -3.048334875 | 0        |
| CSF3R     | 4,705  | 4.77   | 1.27   | -3.755905512 | 0        |
| CSNK1D    | 9,262  | 50.01  | 23.46  | -2.131713555 | 0        |
| CTAGE6    | 5,866  | 1.86   | 0.16   | -11.625      | 0        |
| CTDSPL2   | 3,241  | 12.21  | 4.42   | -2.762443439 | 0        |
| CTGF      | 2,286  | 328.19 | 122.78 | -2.672992344 | 0        |
| CTNNAL1   | 2,695  | 17.58  | 5.10   | -3.447058824 | 0        |
| CTNND1    | 7,311  | 42.25  | 16.62  | -2.54211793  | 0        |
| CTRL      | 1,169  | 6.85   | 0.65   | -10.53846154 | 0        |
| CTSK      | 1,702  | 2.84   | 0.35   | -8.114285714 | 2.31E-10 |
| CTTNBP2NL | 4,471  | 7.28   | 2.15   | -3.386046512 | 0        |
| CUGBP1    | 7,276  | 43.47  | 13.17  | -3.300683371 | 0        |
| CUL5      | 6,621  | 7.73   | 2.27   | -3.405286344 | 0        |



|               |        |        |        |              |          |
|---------------|--------|--------|--------|--------------|----------|
| CWF19L1       | 3,747  | 15.37  | 4.93   | -3.117647059 | 0        |
| CXCR4         | 3,049  | 567.92 | 180.43 | -3.147591864 | 0        |
| CXorf40B      | 1.86   | 21.92  | 10.43  | -2.101629914 | 0        |
| CXYorf2       | 0.902  | 12.50  | 5.42   | -2.306273063 | 9.37E-08 |
| CXYorf3       | 3.21   | 49.10  | 22.31  | -2.200806813 | 0        |
| CYLD          | 6,782  | 16.76  | 7.90   | -2.121518987 | 0        |
| D2HGDH        | 2,893  | 20.76  | 6.81   | -3.04845815  | 0        |
| DCP1A         | 4,013  | 18.54  | 5.01   | -3.700598802 | 0        |
| DCTN4         | 4,481  | 90.76  | 32.58  | -2.785758134 | 0        |
| DCTN6         | 1,234  | 22.05  | 8.41   | -2.621878716 | 0        |
| DDC           | 5,174  | 5.72   | 1.46   | -3.917808219 | 0        |
| DDHD1         | 3,548  | 5.64   | 2.37   | -2.379746835 | 2.17E-13 |
| DDI2          | 1,759  | 9.00   | 1.78   | -5.056179775 | 0        |
| DDIT3         | 0.911  | 26.07  | 8.41   | -3.099881094 | 0        |
| DDR1          | 12,999 | 2.41   | 0.27   | -8.925925926 | 0        |
| DDX3Y         | 4.41   | 41.60  | 11.90  | -3.495798319 | 0        |
| DDX59         | 5,113  | 12.99  | 5.50   | -2.361818182 | 0        |
| DEADC1        | 3,548  | 5.19   | 2.18   | -2.380733945 | 1.96E-12 |
| deltaNEMO     | 8,886  | 8.97   | 1.90   | -4.721052632 | 0        |
| DENND3        | 9,178  | 154.02 | 48.82  | -3.154854568 | 0        |
| DENND4A       | 6,585  | 11.93  | 2.49   | -4.791164659 | 0        |
| DENND4C       | 5,507  | 7.46   | 3.02   | -2.470198675 | 0        |
| DGKD          | 11,352 | 35.02  | 11.42  | -3.066549912 | 0        |
| DHRS12        | 3,694  | 8.03   | 3.58   | -2.24301676  | 0        |
| DHX36         | 3,601  | 9.64   | 4.56   | -2.114035088 | 0        |
| DHX40P        | 39,226 | 0.29   | 0.03   | -9.666666667 | 0        |
| DICER1        | 10,413 | 9.33   | 1.92   | -4.859375    | 0        |
| DKFZP564O0523 | 3,434  | 5.42   | 1.57   | -3.452229299 | 0        |
| DKFZp586l1420 | 5.52   | 13.15  | 3.10   | -4.241935484 | 0        |
| DLG3          | 5,148  | 9.79   | 0.93   | -10.52688172 | 0        |
| DLL1          | 3,077  | 3.60   | 1.32   | -2.727272727 | 1.32E-09 |
| DMTF1         | 8,625  | 15.44  | 4.42   | -3.49321267  | 0        |
| DNAH1         | 13,429 | 3.18   | 1.14   | -2.789473684 | 0        |
| DNAH17        | 4,791  | 1.84   | 0.39   | -4.717948718 | 2.01E-13 |
| DNAJB14       | 5.96   | 4.15   | 1.27   | -3.267716535 | 0        |
| DNAJB9        | 4,742  | 2.06   | 0.54   | -3.814814815 | 3.25E-12 |
| DNHD1         | 3,378  | 3.19   | 1.17   | -2.726495726 | 1.81E-09 |

|          |        |        |        |              |          |
|----------|--------|--------|--------|--------------|----------|
| DNM1L    | 4,015  | 16.19  | 7.07   | -2.289957567 | 0        |
| DNMBP    | 6,199  | 20.00  | 3.48   | -5.747126437 | 0        |
| DOK2     | 1.77   | 5.93   | 1.28   | -4.6328125   | 1.00E-15 |
| DOPEY1   | 7,899  | 2.70   | 1.16   | -2.327586207 | 1.21E-13 |
| DRAM     | 3,058  | 6.66   | 2.94   | -2.265306122 | 2.02E-12 |
| DST      | 30,184 | 0.20   | 0.02   | -10          | 5.90E-14 |
| DUSP10   | 3,609  | 3.01   | 0.87   | -3.459770115 | 2.54E-12 |
| DUSP2    | 1,682  | 35.18  | 7.51   | -4.684420772 | 0        |
| DUSP26   | 1,649  | 22.08  | 8.33   | -2.650660264 | 0        |
| DUSP8    | 2,371  | 11.18  | 0.10   | -111.8       | 0        |
| DYNC1LI2 | 6,326  | 25.31  | 4.45   | -5.687640449 | 0        |
| DYRK1A   | 13.9   | 14.93  | 4.24   | -3.521226415 | 0        |
| EAF1     | 4,838  | 22.25  | 10.53  | -2.113010446 | 0        |
| EDD1     | 9,394  | 19.77  | 7.17   | -2.757322176 | 0        |
| EDG1     | 2,898  | 24.38  | 0.35   | -69.65714286 | 0        |
| EDG4     | 1,823  | 14.43  | 5.22   | -2.764367816 | 0        |
| EFCAB4B  | 2,719  | 7.42   | 2.28   | -3.254385965 | 0        |
| EIF1     | 1,468  | 669.51 | 319.15 | -2.097791007 | 0        |
| EIF1B    | 1,012  | 81.54  | 27.97  | -2.915266357 | 0        |
| EIF2AK3  | 5,251  | 55.13  | 3.08   | -17.89935065 | 0        |
| EIF2AK4  | 5,512  | 23.19  | 10.79  | -2.149212234 | 0        |
| EIF2C2   | 7,328  | 33.21  | 2.48   | -13.39112903 | 0        |
| ELF1     | 4,508  | 98.15  | 22.58  | -4.34676705  | 0        |
| ELF2     | 4,018  | 18.39  | 4.33   | -4.247113164 | 0        |
| ELK4     | 5,347  | 6.20   | 2.86   | -2.167832168 | 0        |
| ELL2     | 4,525  | 11.80  | 3.14   | -3.757961783 | 0        |
| EML4     | 5,523  | 10.25  | 3.78   | -2.711640212 | 0        |
| EMP3     | 0.816  | 141.50 | 43.15  | -3.279258401 | 0        |
| ENTPD4   | 10,151 | 49.61  | 5.99   | -8.282136895 | 0        |
| EPAS1    | 5,138  | 39.07  | 8.68   | -4.501152074 | 0        |
| EPB41L4A | 4,707  | 5.02   | 1.72   | -2.918604651 | 0        |
| EPM2AIP1 | 5,567  | 8.64   | 4.03   | -2.143920596 | 0        |
| EPS8     | 3,906  | 4.38   | 0.48   | -9.125       | 0        |
| ERO1LB   | 3,689  | 12.44  | 2.02   | -6.158415842 | 0        |
| ERV3     | 3,558  | 7.20   | 2.56   | -2.8125      | 0        |
| ETAA1    | 3,283  | 4.25   | 1.87   | -2.272727273 | 3.32E-09 |
| ETS1     | 5,194  | 17.60  | 6.76   | -2.603550296 | 0        |

|           |        |        |       |              |          |
|-----------|--------|--------|-------|--------------|----------|
| ETS2      | 7,575  | 157.35 | 53.57 | -2.937278327 | 0        |
| ETV3      | 1,411  | 6.24   | 1.13  | -5.522123894 | 3.00E-15 |
| EXOC8     | 5,099  | 5.55   | 1.49  | -3.724832215 | 0        |
| F13A1     | 3,834  | 20.74  | 3.93  | -5.27735369  | 0        |
| F3        | 3.26   | 15.85  | 0.15  | -105.6666667 | 0        |
| FABP5L3   | 14,901 | 4.74   | 0.55  | -8.618181818 | 0        |
| FADS3     | 1,779  | 31.81  | 8.62  | -3.69025522  | 0        |
| FAM105B   | 3,999  | 9.35   | 4.51  | -2.073170732 | 0        |
| FAM116A   | 4,643  | 9.44   | 2.70  | -3.496296296 | 0        |
| FAM13A1   | 6,134  | 3.31   | 1.11  | -2.981981982 | 0        |
| FAM13A1OS | 3.21   | 2.87   | 0.71  | -4.042253521 | 2.37E-12 |
| FAM3C     | 6,602  | 13.76  | 1.94  | -7.092783505 | 0        |
| FAM44A    | 10,542 | 7.37   | 3.42  | -2.15497076  | 0        |
| FAM49A    | 4,208  | 29.79  | 12.36 | -2.410194175 | 0        |
| FAM53B    | 5,907  | 138.38 | 46.21 | -2.994589916 | 0        |
| FAM53C    | 4.13   | 39.72  | 16.42 | -2.419001218 | 0        |
| FAM69B    | 5,087  | 29.35  | 7.11  | -4.127988748 | 0        |
| FAM73A    | 5,274  | 1.30   | 0.38  | -3.421052632 | 2.21E-08 |
| FAM76B    | 3,825  | 8.23   | 2.21  | -3.7239819   | 0        |
| FAM8A1    | 4,677  | 10.68  | 1.60  | -6.675       | 0        |
| FAM91A1   | 5,617  | 13.23  | 1.68  | -7.875       | 0        |
| FBXL20    | 3.76   | 9.73   | 3.79  | -2.567282322 | 0        |
| FBXL3     | 3,468  | 17.57  | 5.44  | -3.229779412 | 0        |
| FBXO11    | 5.44   | 22.95  | 7.99  | -2.872340426 | 0        |
| FBXO3     | 2,986  | 10.87  | 1.56  | -6.967948718 | 0        |
| FBXO30    | 4,408  | 2.90   | 1.05  | -2.761904762 | 2.77E-11 |
| FBXO31    | 4,997  | 20.85  | 7.55  | -2.761589404 | 0        |
| FBXO32    | 1,855  | 4.59   | 0.95  | -4.831578947 | 1.21E-13 |
| FBXO33    | 3,683  | 8.57   | 2.26  | -3.792035398 | 0        |
| FBXO34    | 3,537  | 14.18  | 6.94  | -2.043227666 | 0        |
| FBXO8     | 2,564  | 5.13   | 2.17  | -2.3640553   | 5.07E-09 |
| FBXW2     | 1,875  | 23.91  | 11.82 | -2.02284264  | 0        |
| FBXW7     | 5,823  | 62.85  | 25.84 | -2.432275542 | 0        |
| FCHO2     | 4.89   | 2.81   | 1.02  | -2.754901961 | 1.22E-11 |
| FEM1C     | 6,444  | 12.43  | 1.10  | -11.3        | 0        |
| FFAR1     | 1.89   | 10.36  | 0.19  | -54.52631579 | 0        |
| FGD6      | 4,996  | 2.02   | 0.55  | -3.672727273 | 1.62E-12 |

|          |        |        |       |              |          |
|----------|--------|--------|-------|--------------|----------|
| FKBP5    | 5.38   | 115.29 | 28.43 | -4.055223356 | 0        |
| FLJ10154 | 4,009  | 81.15  | 36.87 | -2.200976404 | 0        |
| FLJ10213 | 1,679  | 4.30   | 0.50  | -8.6         | 2.00E-15 |
| FLJ10324 | 7,693  | 3.30   | 0.27  | -12.22222222 | 0        |
| FLJ10404 | 4.6    | 26.63  | 11.34 | -2.348324515 | 0        |
| FLJ13197 | 2,368  | 8.27   | 0.82  | -10.08536585 | 0        |
| FLJ20152 | 4,085  | 5.01   | 0.12  | -41.75       | 0        |
| FLJ20309 | 4,485  | 6.88   | 1.98  | -3.474747475 | 0        |
| FLJ21865 | 3.95   | 12.30  | 5.77  | -2.131715771 | 0        |
| FLJ22639 | 1,301  | 4.26   | 0.65  | -6.553846154 | 7.67E-11 |
| FLJ33590 | 2,163  | 6.08   | 0.78  | -7.794871795 | 0        |
| FLJ37953 | 5,134  | 3.41   | 1.41  | -2.418439716 | 4.01E-12 |
| FLJ38379 | 4,035  | 7.84   | 1.23  | -6.37398374  | 0        |
| FLJ38717 | 2,617  | 2.65   | 0.29  | -9.137931034 | 3.00E-15 |
| FLJ39632 | 4,779  | 2.84   | 1.32  | -2.151515152 | 3.53E-08 |
| FLJ41352 | 4,562  | 27.33  | 10.83 | -2.523545706 | 0        |
| FLJ43276 | 2.15   | 2.25   | 0.20  | -11.25       | 1.62E-11 |
| FLJ43339 | 7,848  | 74.59  | 24.08 | -3.097591362 | 0        |
| FLJ45340 | 7,078  | 1.38   | 0.48  | -2.875       | 3.24E-09 |
| FLT1     | 5,783  | 5.10   | 2.40  | -2.125       | 1.00E-15 |
| FMR1     | 5,378  | 12.81  | 3.42  | -3.745614035 | 0        |
| FNBP4    | 4,609  | 37.93  | 16.63 | -2.280817799 | 0        |
| FNDC3A   | 6,001  | 4.76   | 2.29  | -2.07860262  | 3.20E-14 |
| FNIP1    | 6,567  | 12.57  | 1.11  | -11.32432432 | 0        |
| FOSL2    | 5,685  | 28.45  | 3.90  | -7.294871795 | 0        |
| FOXJ3    | 5,906  | 45.03  | 11.24 | -4.006227758 | 0        |
| FOXK1    | 22,382 | 4.87   | 2.37  | -2.054852321 | 0        |
| FOXO1A   | 6,561  | 74.69  | 12.82 | -5.826053042 | 0        |
| FOXO3A   | 4.23   | 19.72  | 4.49  | -4.391982183 | 0        |
| FPR1     | 1,317  | 12.32  | 0.96  | -12.83333333 | 0        |
| FRAT2    | 2,205  | 6.42   | 3.09  | -2.077669903 | 5.79E-08 |
| FRS2     | 1,782  | 7.83   | 1.14  | -6.868421053 | 0        |
| FURIN    | 4.18   | 70.30  | 29.80 | -2.359060403 | 0        |
| FUSIP1   | 4,199  | 23.49  | 9.13  | -2.572836802 | 0        |
| FZD6     | 3,754  | 7.91   | 3.93  | -2.012722646 | 7.20E-14 |
| FZD8     | 3,186  | 21.62  | 3.23  | -6.693498452 | 0        |
| GAB2     | 6,429  | 92.06  | 31.05 | -2.96489533  | 0        |

|           |        |        |       |              |          |
|-----------|--------|--------|-------|--------------|----------|
| GABARAPL1 | 1.87   | 37.72  | 1.85  | -20.38918919 | 0        |
| GABPB2    | 4,682  | 37.80  | 17.14 | -2.205367561 | 0        |
| GALNACT-2 | 3,724  | 8.34   | 2.33  | -3.579399142 | 0        |
| GARNL4    | 6,661  | 15.52  | 5.74  | -2.703832753 | 0        |
| GAS7      | 8,773  | 15.89  | 5.19  | -3.061657033 | 0        |
| GATS      | 7,214  | 12.44  | 5.01  | -2.483033932 | 0        |
| GCC1      | 8,264  | 3.94   | 1.67  | -2.359281437 | 0        |
| GFOD1     | 5,515  | 16.26  | 1.16  | -14.01724138 | 0        |
| GHR       | 4.36   | 1.64   | 0.48  | -3.416666667 | 1.26E-08 |
| GK5       | 10,085 | 1.21   | 0.24  | -5.041666667 | 0        |
| GLUDP3    | 6,136  | 2.95   | 0.66  | -4.46969697  | 0        |
| GMEB2     | 6.02   | 29.25  | 5.46  | -5.357142857 | 0        |
| GMFB      | 4,125  | 7.48   | 1.65  | -4.533333333 | 0        |
| GNA12     | 11,224 | 33.25  | 11.23 | -2.960819234 | 0        |
| GNA13     | 4,972  | 36.27  | 12.28 | -2.953583062 | 0        |
| GNLY      | 1.21   | 14.23  | 3.20  | -4.446875    | 0        |
| GOLGA1    | 4,798  | 3.14   | 1.33  | -2.360902256 | 2.24E-10 |
| GOLGA4    | 7,702  | 5.33   | 2.29  | -2.327510917 | 0        |
| GOLGA8A   | 5,229  | 14.44  | 2.79  | -5.17562724  | 0        |
| GOLGA8B   | 4,044  | 23.71  | 3.09  | -7.673139159 | 0        |
| GOLGB1    | 11.09  | 12.23  | 5.87  | -2.083475298 | 0        |
| GOLT1B    | 2,924  | 4.27   | 1.18  | -3.618644068 | 1.50E-14 |
| GPR110    | 9,504  | 46.32  | 15.44 | -3           | 0        |
| GPR132    | 7,358  | 33.27  | 8.34  | -3.989208633 | 0        |
| GPR146    | 3,514  | 11.57  | 3.71  | -3.118598383 | 0        |
| GPR160    | 2,473  | 7.80   | 0.63  | -12.38095238 | 0        |
| GPR176    | 5,352  | 102.80 | 8.22  | -12.50608273 | 0        |
| GPR81     | 2,977  | 3.53   | 0.40  | -8.825       | 0        |
| GPR97     | 2,656  | 3.32   | 0.44  | -7.545454545 | 0        |
| GPRASP1   | 4,705  | 2.00   | 0.41  | -4.87804878  | 8.00E-15 |
| GPRC5C    | 2,434  | 13.70  | 5.85  | -2.341880342 | 0        |
| GPRIN3    | 10,165 | 37.37  | 13.09 | -2.854851031 | 0        |
| GRAMD1C   | 3,912  | 4.99   | 0.70  | -7.128571429 | 0        |
| GRASP     | 4,322  | 54.14  | 0.53  | -102.1509434 | 0        |
| GRB7      | 3,417  | 26.43  | 1.84  | -14.36413043 | 0        |
| GREM1     | 4,134  | 2.90   | 1.10  | -2.636363636 | 7.10E-10 |
| GSPT1     | 4,171  | 63.83  | 24.96 | -2.557291667 | 0        |

|             |         |        |        |              |          |
|-------------|---------|--------|--------|--------------|----------|
| GTF2IP1     | 111,876 | 0.13   | 0.06   | -2.166666667 | 9.72E-09 |
| GYG1        | 1,805   | 53.99  | 13.30  | -4.059398496 | 0        |
| H1F0        | 2.33    | 506.91 | 186.19 | -2.72254149  | 0        |
| H1FX        | 1,503   | 553.27 | 272.54 | -2.030050635 | 0        |
| H3F3A       | 2,223   | 14.29  | 1.21   | -11.80991736 | 0        |
| HABP4       | 2,102   | 12.33  | 2.83   | -4.356890459 | 0        |
| HBP1        | 7,193   | 27.86  | 4.81   | -5.792099792 | 0        |
| HCFC2       | 2,583   | 6.59   | 2.12   | -3.108490566 | 0        |
| hCG_1778014 | 2,645   | 1.90   | 0.13   | -14.61538462 | 5.59E-13 |
| hCG_20114   | 1,404   | 7.96   | 2.10   | -3.79047619  | 6.80E-14 |
| hCG_26523   | 0.523   | 149.26 | 37.21  | -4.011287288 | 0        |
| HECA        | 5,621   | 49.18  | 5.49   | -8.958105647 | 0        |
| HEG1        | 9,213   | 1.43   | 0.24   | -5.958333333 | 0        |
| HERC1       | 16.21   | 13.04  | 4.97   | -2.623742455 | 0        |
| HEXIM1      | 4,785   | 15.96  | 7.72   | -2.067357513 | 0        |
| HIAT1       | 2,915   | 17.71  | 8.61   | -2.056910569 | 0        |
| HIATL2      | 68,322  | 0.20   | 0.07   | -2.857142857 | 1.69E-12 |
| HIC2        | 6,794   | 5.12   | 2.33   | -2.197424893 | 0        |
| HIF1A       | 7,182   | 104.35 | 12.92  | -8.076625387 | 0        |
| HIP1R       | 4,473   | 20.99  | 2.02   | -10.39108911 | 0        |
| HIPK1       | 9,005   | 31.01  | 6.34   | -4.891167192 | 0        |
| HIPK3       | 5,721   | 28.84  | 10.10  | -2.855445545 | 0        |
| HIVEP1      | 9,026   | 4.44   | 0.97   | -4.577319588 | 0        |
| HLA-DRB2    | 15.03   | 1.81   | 0.90   | -2.011111111 | 6.54E-13 |
| HPS4        | 11,287  | 190.06 | 67.09  | -2.832911015 | 0        |
| HRB         | 6,513   | 22.16  | 5.69   | -3.894551845 | 0        |
| HRH2        | 3,315   | 22.98  | 8.40   | -2.735714286 | 0        |
| HSF2        | 2,445   | 7.81   | 2.52   | -3.099206349 | 0        |
| HSF4        | 1,546   | 9.22   | 4.20   | -2.195238095 | 1.43E-08 |
| HSPC049     | 6,712   | 14.02  | 6.56   | -2.137195122 | 0        |
| HSZFP36     | 2,368   | 2.88   | 0.85   | -3.388235294 | 3.54E-08 |
| IBRDC2      | 4,768   | 1.08   | 0.07   | -15.42857143 | 1.47E-13 |
| ICOSLG      | 4,996   | 41.13  | 14.29  | -2.878236529 | 0        |
| IDI1        | 2,427   | 43.13  | 19.55  | -2.206138107 | 0        |
| IFNGR1      | 2,249   | 20.54  | 8.59   | -2.391152503 | 0        |
| IFNGR2      | 2,494   | 19.60  | 9.36   | -2.094017094 | 0        |
| IFRG15      | 0.396   | 50.72  | 6.81   | -7.447870778 | 0        |

|          |        |        |        |               |          |
|----------|--------|--------|--------|---------------|----------|
| IGHJ5    | 0.768  | 21.26  | 4.22   | -5.037914692  | 0        |
| IGHJ6    | 2,716  | 34.79  | 11.90  | -2.923529412  | 0        |
| IGHM     | 2,077  | 487.54 | 194.55 | -2.505988178  | 0        |
| IGHV4-59 | 0.35   | 189.39 | 57.28  | -3.306389665  | 0        |
| IHPK1    | 4,856  | 32.29  | 12.61  | -2.560666138  | 0        |
| IKZF5    | 2.9    | 14.33  | 2.67   | -5.367041199  | 0        |
| IL10RA   | 3,649  | 25.27  | 11.54  | -2.189774697  | 0        |
| IL17RA   | 4,007  | 6.18   | 1.87   | -3.304812834  | 0        |
| IL18RAP  | 2,668  | 2.56   | 0.09   | -28.444444444 | 0        |
| IL1RAP   | 5,662  | 2.93   | 0.89   | -3.292134831  | 0        |
| IL6ST    | 8,247  | 30.79  | 2.01   | -15.31840796  | 0        |
| IL6STP   | 13,085 | 0.46   | 0.07   | -6.571428571  | 6.68E-12 |
| IL7R     | 3,309  | 14.47  | 7.01   | -2.064194009  | 0        |
| INPP5F   | 5.61   | 5.55   | 1.96   | -2.831632653  | 0        |
| INSR     | 8,558  | 48.35  | 20.69  | -2.336877719  | 0        |
| IRAK3    | 2,567  | 20.31  | 1.18   | -17.21186441  | 0        |
| IRF4     | 5,056  | 3.89   | 1.68   | -2.31547619   | 1.53E-12 |
| IRGQ     | 2,484  | 7.45   | 2.13   | -3.497652582  | 0        |
| IRS2     | 7.68   | 28.82  | 2.81   | -10.25622776  | 0        |
| ISG20    | 2,284  | 38.47  | 14.28  | -2.693977591  | 0        |
| ISYNA1   | 1,825  | 3.58   | 0.65   | -5.507692308  | 2.15E-11 |
| ITCH     | 6,357  | 16.15  | 4.84   | -3.33677686   | 0        |
| ITGA10   | 5.17   | 2.36   | 0.46   | -5.130434783  | 0        |
| ITGA5    | 5,395  | 90.46  | 44.73  | -2.02235636   | 0        |
| ITGA9    | 4,876  | 11.53  | 1.47   | -7.843537415  | 0        |
| ITGAV    | 7,022  | 1.27   | 0.38   | -3.342105263  | 3.34E-10 |
| ITGAX    | 4,649  | 2.64   | 0.16   | -16.5         | 0        |
| ITIH4    | 3.26   | 5.04   | 1.09   | -4.623853211  | 0        |
| ITK      | 4,366  | 2.11   | 0.06   | -35.16666667  | 0        |
| ITPKB    | 6,151  | 9.89   | 4.36   | -2.268348624  | 0        |
| ITPR1    | 13,031 | 22.01  | 6.20   | -3.55         | 0        |
| ITSN2    | 8,249  | 13.50  | 4.64   | -2.909482759  | 0        |
| IVNS1ABP | 8,456  | 32.65  | 6.67   | -4.895052474  | 0        |
| JARID1A  | 7,024  | 25.25  | 7.38   | -3.421409214  | 0        |
| JARID2   | 14,431 | 32.15  | 5.58   | -5.761648746  | 0        |
| JMJD1A   | 4,718  | 24.79  | 7.32   | -3.386612022  | 0        |
| JMJD1C   | 10,104 | 45.34  | 6.66   | -6.807807808  | 0        |

|          |        |        |        |              |          |
|----------|--------|--------|--------|--------------|----------|
| JMY      | 2,677  | 11.39  | 2.07   | -5.502415459 | 0        |
| JOSD3    | 2,722  | 43.43  | 13.75  | -3.158545455 | 0        |
| JUNB     | 1,816  | 73.27  | 29.50  | -2.483728814 | 0        |
| JUND     | 1,899  | 541.94 | 190.96 | -2.83797654  | 0        |
| KALRN    | 12.55  | 2.88   | 0.51   | -5.647058824 | 0        |
| KATNAL1  | 8,215  | 6.07   | 1.68   | -3.613095238 | 0        |
| KBTBD11  | 6.71   | 3.14   | 1.10   | -2.854545455 | 0        |
| KBTBD2   | 7,216  | 16.47  | 4.60   | -3.580434783 | 0        |
| KBTBD8   | 4,617  | 2.52   | 0.42   | -6           | 0        |
| KCNC3    | 4,096  | 5.65   | 2.60   | -2.173076923 | 7.04E-13 |
| KCNS3    | 2.33   | 17.71  | 6.36   | -2.784591195 | 0        |
| KCTD7    | 5.15   | 3.23   | 1.42   | -2.274647887 | 1.20E-10 |
| KIAA0143 | 5,313  | 11.51  | 4.86   | -2.368312757 | 0        |
| KIAA0182 | 7,395  | 9.02   | 2.01   | -4.487562189 | 0        |
| KIAA0247 | 5,614  | 19.85  | 8.81   | -2.253121453 | 0        |
| KIAA0256 | 6,779  | 25.55  | 4.03   | -6.339950372 | 0        |
| KIAA0317 | 5,445  | 21.38  | 7.03   | -3.041251778 | 0        |
| KIAA0404 | 8,389  | 27.45  | 6.31   | -4.350237718 | 0        |
| KIAA0776 | 4,408  | 8.73   | 3.52   | -2.480113636 | 0        |
| KIAA0831 | 4,742  | 15.40  | 1.88   | -8.191489362 | 0        |
| KIAA0922 | 5,209  | 18.56  | 4.21   | -4.408551069 | 0        |
| KIAA1033 | 6,679  | 18.86  | 6.34   | -2.974763407 | 0        |
| KIAA1109 | 15,575 | 3.26   | 1.58   | -2.063291139 | 0        |
| KIAA1143 | 0.832  | 11.18  | 4.05   | -2.760493827 | 2.59E-08 |
| KIAA1189 | 5,428  | 19.05  | 0.06   | -317.5       | 0        |
| KIAA1333 | 5,533  | 1.93   | 0.70   | -2.757142857 | 2.73E-09 |
| KIAA1370 | 6,365  | 11.84  | 2.79   | -4.243727599 | 0        |
| KIAA1432 | 5,674  | 19.72  | 6.55   | -3.010687023 | 0        |
| KIAA1468 | 3,396  | 6.23   | 2.35   | -2.65106383  | 0        |
| KIAA1509 | 7,965  | 17.31  | 6.59   | -2.626707132 | 0        |
| KIAA1530 | 4.56   | 4.54   | 2.25   | -2.017777778 | 2.96E-10 |
| KIAA1546 | 9,233  | 2.84   | 0.52   | -5.461538462 | 0        |
| KIAA1600 | 5.69   | 20.80  | 2.72   | -7.647058824 | 0        |
| KIAA1632 | 12,698 | 6.76   | 2.44   | -2.770491803 | 0        |
| KIAA1683 | 3,757  | 4.48   | 1.75   | -2.56        | 1.02E-12 |
| KIAA1718 | 18,356 | 1.14   | 0.52   | -2.192307692 | 5.85E-12 |
| KIAA1754 | 5,119  | 24.32  | 8.11   | -2.998766954 | 0        |



|          |        |        |       |              |          |
|----------|--------|--------|-------|--------------|----------|
| KIAA1881 | 6,353  | 0.76   | 0.08  | -9.5         | 4.96E-11 |
| KIAA2002 | 11,249 | 4.12   | 1.35  | -3.051851852 | 0        |
| KIAA2018 | 9,429  | 5.89   | 2.12  | -2.778301887 | 0        |
| KIF21B   | 9,895  | 1.84   | 0.82  | -2.243902439 | 3.68E-11 |
| KIFC2    | 3,248  | 7.43   | 2.96  | -2.510135135 | 0        |
| KLF13    | 6.8    | 106.08 | 19.25 | -5.510649351 | 0        |
| KLF2     | 2,035  | 257.18 | 85.04 | -3.024223895 | 0        |
| KLF3     | 6,564  | 45.29  | 7.21  | -6.281553398 | 0        |
| KLF7     | 10,632 | 34.14  | 2.82  | -12.10638298 | 0        |
| KLF9     | 5,208  | 65.64  | 4.89  | -13.42331288 | 0        |
| KLHDC2   | 1,806  | 34.24  | 16.32 | -2.098039216 | 0        |
| KLHL14   | 4,261  | 1.77   | 0.08  | -22.125      | 0        |
| KLHL15   | 2.62   | 12.04  | 2.67  | -4.509363296 | 0        |
| KLHL2    | 5,813  | 54.02  | 13.92 | -3.880747126 | 0        |
| KLHL24   | 9,309  | 38.42  | 2.36  | -16.27966102 | 0        |
| KLHL26   | 3,122  | 3.46   | 1.38  | -2.507246377 | 1.82E-08 |
| KLHL29   | 5,047  | 1.41   | 0.17  | -8.294117647 | 8.00E-15 |
| KLHL3    | 6.49   | 2.73   | 1.31  | -2.083969466 | 1.28E-09 |
| KLHL5    | 4,021  | 15.95  | 4.19  | -3.806682578 | 0        |
| KPNA4    | 3,802  | 19.13  | 9.26  | -2.06587473  | 0        |
| KPNA5    | 2,158  | 2.84   | 0.54  | -5.259259259 | 1.89E-10 |
| KRAS     | 10,087 | 10.78  | 1.94  | -5.556701031 | 0        |
| LATS2    | 5,589  | 12.85  | 5.51  | -2.332123412 | 0        |
| LBR      | 5,413  | 25.61  | 10.32 | -2.481589147 | 0        |
| LCN6     | 1,195  | 12.26  | 1.78  | -6.887640449 | 0        |
| LCOR     | 5,445  | 4.38   | 0.53  | -8.264150943 | 0        |
| LDLR     | 5,174  | 3.87   | 1.92  | -2.015625    | 6.30E-10 |
| LEMD3    | 4,931  | 25.28  | 10.38 | -2.435452794 | 0        |
| LENG8    | 5,661  | 177.56 | 35.79 | -4.961162336 | 0        |
| LGALS3   | 0.91   | 9.89   | 1.67  | -5.922155689 | 1.00E-15 |
| LGR5     | 2.88   | 1.89   | 0.24  | -7.875       | 1.36E-11 |
| LILRA1   | 1.91   | 3.99   | 0.84  | -4.75        | 8.41E-12 |
| LIMD2    | 4,029  | 107.65 | 48.81 | -2.205490678 | 0        |
| LIN7C    | 4,671  | 4.11   | 1.16  | -3.543103448 | 0        |
| LMBR1L   | 4,744  | 38.40  | 12.02 | -3.194675541 | 0        |
| LMBRD1   | 2,039  | 12.27  | 5.33  | -2.30206379  | 4.00E-15 |
| LMTK2    | 11,523 | 2.40   | 0.92  | -2.608695652 | 0        |

|           |        |        |       |              |          |
|-----------|--------|--------|-------|--------------|----------|
| LNx2      | 5,189  | 6.44   | 1.02  | -6.31372549  | 0        |
| LOC138948 | 2,901  | 2.56   | 0.49  | -5.224489796 | 1.51E-12 |
| LOC143188 | 1,335  | 7.71   | 0.47  | -16.40425532 | 0        |
| LOC146517 | 7,518  | 30.10  | 3.91  | -7.698209719 | 0        |
| LOC153222 | 5,964  | 15.31  | 1.67  | -9.167664671 | 0        |
| LOC155100 | 4,852  | 6.36   | 0.96  | -6.625       | 0        |
| LOC162073 | 2,979  | 9.10   | 2.76  | -3.297101449 | 0        |
| LOC220594 | 4,329  | 1.14   | 0.18  | -6.333333333 | 2.14E-09 |
| LOC23117  | 9,381  | 1.48   | 0.45  | -3.288888889 | 1.40E-14 |
| LOC283663 | 1,177  | 7.48   | 0.50  | -14.96       | 0        |
| LOC283970 | 2,248  | 3.87   | 1.05  | -3.685714286 | 1.15E-10 |
| LOC284371 | 3,537  | 3.05   | 1.15  | -2.652173913 | 4.33E-09 |
| LOC285074 | 1,957  | 8.19   | 3.44  | -2.380813953 | 3.61E-11 |
| LOC285095 | 1,054  | 9.39   | 1.56  | -6.019230769 | 0        |
| LOC285296 | 6,079  | 1.32   | 0.19  | -6.947368421 | 1.00E-15 |
| LOC286016 | 4,225  | 8.53   | 1.38  | -6.18115942  | 0        |
| LOC339745 | 5,709  | 2.81   | 0.65  | -4.323076923 | 0        |
| LOC344423 | 1,313  | 8.59   | 2.04  | -4.210784314 | 2.00E-15 |
| LOC388720 | 0.588  | 33.99  | 5.88  | -5.780612245 | 0        |
| LOC388814 | 0.849  | 13.05  | 3.91  | -3.337595908 | 3.24E-12 |
| LOC390940 | 1,418  | 16.96  | 4.57  | -3.711159737 | 0        |
| LOC391136 | 3,335  | 2.20   | 0.63  | -3.492063492 | 4.96E-09 |
| LOC391526 | 1,091  | 26.48  | 0.25  | -105.92      | 0        |
| LOC391562 | 5,382  | 3.60   | 0.74  | -4.864864865 | 0        |
| LOC399655 | 3,966  | 2.82   | 1.10  | -2.563636364 | 3.82E-09 |
| LOC400451 | 2,627  | 6.97   | 0.93  | -7.494623656 | 0        |
| LOC400879 | 4,778  | 2.01   | 0.70  | -2.871428571 | 2.54E-09 |
| LOC400927 | 39,945 | 0.32   | 0.15  | -2.133333333 | 1.67E-07 |
| LOC401577 | 1,023  | 9.28   | 1.24  | -7.483870968 | 0        |
| LOC440354 | 42,485 | 0.23   | 0.04  | -5.75        | 0        |
| LOC440359 | 1,869  | 120.48 | 45.39 | -2.654329147 | 0        |
| LOC440456 | 4,642  | 12.60  | 1.69  | -7.455621302 | 0        |
| LOC440993 | 2,734  | 5.90   | 1.33  | -4.436090226 | 0        |
| LOC441220 | 7,263  | 3.76   | 0.37  | -10.16216216 | 0        |
| LOC441720 | 15,173 | 0.62   | 0.22  | -2.818181818 | 8.81E-09 |
| LOC442668 | 0.83   | 7.04   | 1.21  | -5.818181818 | 4.69E-11 |
| LOC51233  | 1,625  | 7.06   | 2.87  | -2.459930314 | 1.27E-08 |

|           |        |        |       |              |          |
|-----------|--------|--------|-------|--------------|----------|
| LOC54103  | 4,552  | 3.76   | 1.35  | -2.785185185 | 1.40E-14 |
| LOC55565  | 1,822  | 10.91  | 2.54  | -4.295275591 | 0        |
| LOC595101 | 72,082 | 0.15   | 0.05  | -3           | 7.97E-11 |
| LOC613037 | 26,038 | 0.19   | 0.03  | -6.333333333 | 1.19E-09 |
| LOC642004 | 4,382  | 1.49   | 0.42  | -3.547619048 | 1.73E-08 |
| LOC642096 | 23,878 | 0.37   | 0.08  | -4.625       | 2.01E-13 |
| LOC642395 | 64,887 | 0.48   | 0.10  | -4.8         | 0        |
| LOC642397 | 90,284 | 0.48   | 0.14  | -3.428571429 | 0        |
| LOC643008 | 5,585  | 1.24   | 0.37  | -3.351351351 | 3.18E-08 |
| LOC643167 | 2,454  | 34.39  | 12.42 | -2.768921095 | 0        |
| LOC643219 | 27,473 | 0.75   | 0.14  | -5.357142857 | 0        |
| LOC643260 | 0.525  | 55.97  | 9.15  | -6.116939891 | 0        |
| LOC644010 | 2,696  | 8.26   | 1.79  | -4.61452514  | 0        |
| LOC644231 | 68,093 | 0.15   | 0.06  | -2.5         | 4.47E-08 |
| LOC644315 | 0.72   | 39.57  | 16.38 | -2.415750916 | 0        |
| LOC644330 | 2,672  | 7.48   | 1.65  | -4.533333333 | 0        |
| LOC644353 | 5,825  | 3.02   | 0.84  | -3.595238095 | 0        |
| LOC644761 | 1,509  | 5.50   | 1.62  | -3.395061728 | 1.77E-09 |
| LOC645158 | 2,013  | 3.15   | 0.37  | -8.513513514 | 2.70E-14 |
| LOC645381 | 0.603  | 36.75  | 8.94  | -4.110738255 | 0        |
| LOC645486 | 64,701 | 0.99   | 0.47  | -2.106382979 | 0        |
| LOC645676 | 3,116  | 5.87   | 1.71  | -3.432748538 | 0        |
| LOC645771 | 65,195 | 0.11   | 0.03  | -3.666666667 | 5.31E-09 |
| LOC646022 | 2,478  | 14.45  | 4.13  | -3.498789346 | 0        |
| LOC646202 | 17,155 | 1.20   | 0.59  | -2.033898305 | 2.64E-10 |
| LOC646220 | 2,227  | 11.20  | 1.78  | -6.292134831 | 0        |
| LOC646269 | 0.81   | 108.83 | 43.47 | -2.503565677 | 0        |
| LOC646396 | 26,249 | 0.95   | 0.03  | -31.66666667 | 0        |
| LOC646470 | 0.741  | 7.07   | 0.34  | -20.79411765 | 7.00E-15 |
| LOC646483 | 0.919  | 94.63  | 34.74 | -2.723949338 | 0        |
| LOC646489 | 20,555 | 0.88   | 0.21  | -4.19047619  | 0        |
| LOC646496 | 0.642  | 40.99  | 0.79  | -51.88607595 | 0        |
| LOC646517 | 4,313  | 4.20   | 1.41  | -2.978723404 | 0        |
| LOC646561 | 2,847  | 2.29   | 0.50  | -4.58        | 3.57E-10 |
| LOC646976 | 2,238  | 3.23   | 0.23  | -14.04347826 | 0        |
| LOC647001 | 1,288  | 6.07   | 1.97  | -3.081218274 | 3.59E-08 |
| LOC647121 | 52,598 | 0.13   | 0.03  | -4.333333333 | 3.66E-10 |

|           |        |        |       |              |          |
|-----------|--------|--------|-------|--------------|----------|
| LOC649553 | 24,662 | 0.65   | 0.24  | -2.708333333 | 2.63E-13 |
| LOC650560 | 2.43   | 5.70   | 2.19  | -2.602739726 | 4.55E-11 |
| LOC651746 | 11.93  | 17.70  | 0.03  | -590         | 0        |
| LOC653103 | 1,572  | 13.34  | 3.86  | -3.455958549 | 0        |
| LOC653479 | 38,233 | 0.42   | 0.11  | -3.818181818 | 0        |
| LOC653635 | 24,608 | 0.38   | 0.13  | -2.923076923 | 6.70E-09 |
| LOC677762 | 1,033  | 8.24   | 1.63  | -5.055214724 | 1.21E-13 |
| LOC727725 | 1,907  | 35.59  | 11.54 | -3.084055459 | 0        |
| LOC727758 | 1,319  | 17.48  | 4.02  | -4.348258706 | 0        |
| LOC727843 | 1.72   | 7.76   | 0.98  | -7.918367347 | 0        |
| LOC727866 | 3,398  | 7.95   | 2.75  | -2.890909091 | 0        |
| LOC727869 | 1,117  | 8.77   | 3.47  | -2.527377522 | 9.53E-08 |
| LOC727918 | 2,428  | 6.08   | 2.63  | -2.311787072 | 6.67E-10 |
| LOC727926 | 0.958  | 21.58  | 0.18  | -119.8888889 | 0        |
| LOC728014 | 1,141  | 18.56  | 1.85  | -10.03243243 | 0        |
| LOC728225 | 30,706 | 18.26  | 4.46  | -4.094170404 | 0        |
| LOC728233 | 23,854 | 1.63   | 0.61  | -2.672131148 | 0        |
| LOC728238 | 0.872  | 26.89  | 3.67  | -7.326975477 | 0        |
| LOC728256 | 1.98   | 9.70   | 2.86  | -3.391608392 | 0        |
| LOC728272 | 2,033  | 23.55  | 4.21  | -5.593824228 | 0        |
| LOC728280 | 0.615  | 38.61  | 10.82 | -3.568391867 | 0        |
| LOC728389 | 0.552  | 14.16  | 1.53  | -9.254901961 | 0        |
| LOC728392 | 4,556  | 5.91   | 1.83  | -3.229508197 | 0        |
| LOC728423 | 54,354 | 0.20   | 0.04  | -5           | 0        |
| LOC728512 | 0.39   | 121.26 | 51.63 | -2.348634515 | 0        |
| LOC728533 | 2,377  | 12.49  | 6.02  | -2.074750831 | 6.00E-15 |
| LOC728551 | 0.294  | 41.05  | 11.46 | -3.582024433 | 4.30E-14 |
| LOC728590 | 0.565  | 54.28  | 26.54 | -2.04521477  | 9.00E-15 |
| LOC728677 | 2,186  | 3.17   | 0.23  | -13.7826087  | 0        |
| LOC728730 | 0.73   | 10.17  | 1.16  | -8.767241379 | 1.00E-15 |
| LOC728844 | 1.81   | 71.77  | 27.22 | -2.636664217 | 0        |
| LOC728862 | 7,318  | 29.26  | 5.31  | -5.510357815 | 0        |
| LOC728927 | 1,317  | 6.92   | 0.96  | -7.208333333 | 0        |
| LOC728974 | 2,301  | 20.25  | 1.30  | -15.57692308 | 0        |
| LOC729021 | 6,544  | 5.59   | 0.79  | -7.075949367 | 0        |
| LOC729027 | 1,191  | 6.98   | 1.27  | -5.496062992 | 5.70E-14 |
| LOC729119 | 0.615  | 28.00  | 11.37 | -2.462620932 | 2.75E-12 |

|           |        |       |       |              |          |
|-----------|--------|-------|-------|--------------|----------|
| LOC729154 | 1,502  | 12.78 | 3.14  | -4.070063694 | 0        |
| LOC729211 | 22,577 | 0.43  | 0.04  | -10.75       | 0        |
| LOC729222 | 57,739 | 0.09  | 0.01  | -9           | 3.56E-12 |
| LOC729290 | 1,849  | 39.60 | 4.10  | -9.658536585 | 0        |
| LOC729389 | 0.787  | 96.17 | 46.67 | -2.060638526 | 0        |
| LOC729530 | 3,996  | 27.83 | 2.95  | -9.433898305 | 0        |
| LOC729603 | 3,131  | 6.92  | 0.53  | -13.05660377 | 0        |
| LOC729660 | 8,351  | 0.74  | 0.15  | -4.933333333 | 2.12E-10 |
| LOC729751 | 2,539  | 15.67 | 2.96  | -5.293918919 | 0        |
| LOC729799 | 2,586  | 32.64 | 6.09  | -5.359605911 | 0        |
| LOC729806 | 2,272  | 19.29 | 4.83  | -3.99378882  | 0        |
| LOC729824 | 0.792  | 14.99 | 1.12  | -13.38392857 | 0        |
| LOC729874 | 1,093  | 4.98  | 0.37  | -13.45945946 | 2.00E-14 |
| LOC729897 | 1,637  | 13.66 | 3.24  | -4.216049383 | 0        |
| LOC729946 | 0.527  | 59.13 | 8.31  | -7.115523466 | 0        |
| LOC730051 | 19,925 | 1.03  | 0.50  | -2.06        | 1.53E-10 |
| LOC730062 | 1,419  | 5.79  | 0.36  | -16.08333333 | 0        |
| LOC730092 | 33,969 | 0.46  | 0.13  | -3.538461538 | 0        |
| LOC730099 | 61,001 | 0.30  | 0.12  | -2.5         | 1.70E-13 |
| LOC730108 | 1,014  | 16.59 | 3.24  | -5.12037037  | 0        |
| LOC730111 | 0.828  | 27.48 | 6.20  | -4.432258065 | 0        |
| LOC730161 | 0.629  | 12.43 | 1.22  | -10.18852459 | 0        |
| LOC81625  | 1,938  | 7.15  | 0.48  | -14.89583333 | 0        |
| LONRF1    | 3,584  | 3.54  | 0.35  | -10.11428571 | 0        |
| LOXL2     | 3.81   | 4.26  | 1.35  | -3.155555556 | 0        |
| LPIN1     | 6,117  | 24.70 | 4.14  | -5.966183575 | 0        |
| LPP       | 10,741 | 9.10  | 3.51  | -2.592592593 | 0        |
| LRAP      | 4,226  | 9.65  | 0.65  | -14.84615385 | 0        |
| LRCH1     | 7,774  | 25.88 | 5.06  | -5.114624506 | 0        |
| LRIG2     | 4,015  | 7.57  | 1.95  | -3.882051282 | 0        |
| LRP5L     | 8,835  | 49.47 | 4.23  | -11.69503546 | 0        |
| LRRC37A2  | 3,594  | 7.43  | 3.33  | -2.231231231 | 2.00E-15 |
| LRRC40    | 2,847  | 4.76  | 1.90  | -2.505263158 | 2.62E-10 |
| LRRC57    | 2,647  | 12.52 | 3.43  | -3.650145773 | 0        |
| LRRC8B    | 3,882  | 5.15  | 0.78  | -6.602564103 | 0        |
| LRRC8C    | 4,749  | 65.37 | 13.44 | -4.863839286 | 0        |
| LSR       | 2,278  | 4.12  | 1.51  | -2.728476821 | 2.59E-08 |

|          |        |        |       |              |          |
|----------|--------|--------|-------|--------------|----------|
| LUC7L2   | 9,766  | 34.51  | 14.94 | -2.309906292 | 0        |
| LUZP1    | 7,539  | 19.23  | 7.06  | -2.723796034 | 0        |
| LYSMD3   | 4,261  | 2.09   | 0.69  | -3.028985507 | 2.25E-09 |
| LYSMD4   | 2,885  | 9.60   | 4.33  | -2.217090069 | 1.00E-15 |
| MAD2L1BP | 1.63   | 9.41   | 3.93  | -2.394402036 | 1.28E-10 |
| MAFF     | 2,549  | 29.15  | 2.48  | -11.75403226 | 0        |
| MAFK     | 6,913  | 24.47  | 3.85  | -6.355844156 | 0        |
| MALAT1   | 8,356  | 160.03 | 66.04 | -2.423228346 | 0        |
| MAN2A2   | 6,269  | 16.02  | 6.48  | -2.472222222 | 0        |
| MAP1LC3A | 1,121  | 6.18   | 1.27  | -4.866141732 | 2.34E-11 |
| MAP1LC3B | 2,492  | 97.62  | 33.32 | -2.929771909 | 0        |
| MAP3K2   | 6,562  | 9.83   | 2.34  | -4.200854701 | 0        |
| MAP3K3   | 5,701  | 37.76  | 10.65 | -3.545539906 | 0        |
| MAP3K8   | 3,534  | 6.99   | 1.06  | -6.594339623 | 0        |
| MAP4K3   | 5,202  | 16.97  | 1.60  | -10.60625    | 0        |
| MAP4K5   | 4,614  | 15.39  | 4.21  | -3.655581948 | 0        |
| MAPK7    | 4,378  | 9.49   | 1.90  | -4.994736842 | 0        |
| MAPK8    | 2,607  | 10.32  | 3.76  | -2.744680851 | 0        |
| MAPK8IP3 | 8,412  | 43.14  | 16.61 | -2.597230584 | 0        |
| MAPKAPK2 | 5,572  | 32.01  | 14.88 | -2.151209677 | 0        |
| MARCH5   | 3,926  | 15.53  | 5.73  | -2.710296684 | 0        |
| MARCH6   | 6,451  | 39.02  | 10.81 | -3.609620722 | 0        |
| MASP2    | 3,023  | 6.15   | 0.94  | -6.542553191 | 0        |
| MATN3    | 2,919  | 5.32   | 1.21  | -4.396694215 | 0        |
| MBNL2    | 8,064  | 8.76   | 0.97  | -9.030927835 | 0        |
| MBOAT1   | 3,275  | 5.29   | 2.42  | -2.185950413 | 4.06E-10 |
| MCL1     | 6,934  | 51.50  | 18.81 | -2.737905369 | 0        |
| MDM2     | 6,803  | 37.06  | 15.59 | -2.377164849 | 0        |
| MDM4     | 4,666  | 34.86  | 4.74  | -7.35443038  | 0        |
| ME3      | 2,342  | 10.99  | 4.03  | -2.727047146 | 0        |
| MECP2    | 11,364 | 8.99   | 4.38  | -2.052511416 | 0        |
| MED6     | 1,344  | 12.37  | 4.51  | -2.742793792 | 8.40E-14 |
| MERTK    | 3,626  | 4.09   | 0.25  | -16.36       | 0        |
| MFN1     | 3,519  | 9.98   | 2.28  | -4.377192982 | 0        |
| MGAM     | 12,969 | 0.87   | 0.09  | -9.666666667 | 0        |
| MGAT5    | 6,255  | 4.63   | 1.16  | -3.99137931  | 0        |
| MGC17330 | 2,846  | 75.41  | 25.93 | -2.908214423 | 0        |

|          |        |        |       |              |          |
|----------|--------|--------|-------|--------------|----------|
| MGC40489 | 3,344  | 15.21  | 6.39  | -2.38028169  | 0        |
| MGC45134 | 1,627  | 44.82  | 6.47  | -6.927357032 | 0        |
| MGEA5    | 9,236  | 71.66  | 20.82 | -3.441882805 | 0        |
| MIER1    | 4,972  | 7.72   | 1.84  | -4.195652174 | 0        |
| MIER3    | 5,201  | 7.71   | 2.01  | -3.835820896 | 0        |
| MIS12    | 2,502  | 9.37   | 4.44  | -2.11036036  | 1.41E-12 |
| MKLN1    | 22,736 | 3.00   | 0.99  | -3.03030303  | 0        |
| MKNK2    | 4,546  | 115.48 | 51.82 | -2.228483211 | 0        |
| MLL      | 14,982 | 9.90   | 2.98  | -3.322147651 | 0        |
| MLL3     | 36,091 | 5.34   | 1.43  | -3.734265734 | 0        |
| MLL5     | 15,171 | 39.27  | 6.99  | -5.618025751 | 0        |
| MLSTD2   | 5,602  | 8.10   | 1.69  | -4.792899408 | 0        |
| MMP23A   | 5,465  | 2.64   | 1.09  | -2.422018349 | 2.69E-10 |
| MMP28    | 3,035  | 8.67   | 3.31  | -2.619335347 | 0        |
| MOBKL1A  | 6,958  | 2.58   | 1.10  | -2.345454545 | 6.81E-12 |
| MORC3    | 4,227  | 9.39   | 4.24  | -2.214622642 | 0        |
| MSI2     | 9,352  | 38.66  | 17.72 | -2.181715576 | 0        |
| MTCH1    | 3,289  | 122.04 | 55.04 | -2.217296512 | 0        |
| MTMR10   | 3,594  | 19.32  | 2.09  | -9.244019139 | 0        |
| MTMR15   | 7,575  | 13.57  | 6.05  | -2.242975207 | 0        |
| MTMR3    | 6,367  | 27.69  | 7.17  | -3.861924686 | 0        |
| MTMR6    | 4,185  | 11.99  | 1.73  | -6.930635838 | 0        |
| MTSS1    | 11,305 | 40.00  | 4.20  | -9.523809524 | 0        |
| MTX3     | 6,155  | 1.77   | 0.23  | -7.695652174 | 0        |
| MUC12    | 9,166  | 9.05   | 2.10  | -4.30952381  | 0        |
| MUC20    | 1,828  | 6.77   | 1.94  | -3.489690722 | 5.70E-14 |
| MUSTN1   | 1,725  | 11.87  | 4.25  | -2.792941176 | 0        |
| MXD1     | 5,587  | 4.39   | 0.66  | -6.651515152 | 0        |
| MXI1     | 3,968  | 9.15   | 3.50  | -2.614285714 | 0        |
| MYLIP    | 3,493  | 24.75  | 6.53  | -3.790199081 | 0        |
| MYO10    | 8,808  | 28.55  | 4.66  | -6.126609442 | 0        |
| MYO15B   | 2,908  | 7.11   | 1.19  | -5.974789916 | 0        |
| MYO1F    | 3,827  | 3.49   | 1.23  | -2.837398374 | 4.65E-12 |
| MYO1G    | 6,484  | 7.81   | 2.58  | -3.027131783 | 0        |
| MYSM1    | 3,546  | 9.63   | 3.37  | -2.857566766 | 0        |
| MYST3    | 7.86   | 57.62  | 11.08 | -5.200361011 | 0        |
| NAPE-PLD | 9,674  | 5.16   | 0.37  | -13.94594595 | 0        |

|          |       |         |        |               |          |
|----------|-------|---------|--------|---------------|----------|
| NAPG     | 1,507 | 8.08    | 3.48   | -2.32183908   | 2.18E-08 |
| NARG1L   | 4,754 | 5.45    | 1.37   | -3.97810219   | 0        |
| NBPF11   | 5,541 | 1.71    | 0.64   | -2.671875     | 4.05E-08 |
| NCOA3    | 8,028 | 10.76   | 5.20   | -2.069230769  | 0        |
| NDUFV2P1 | 1,181 | 37.11   | 14.41  | -2.575294934  | 0        |
| NECAP1   | 2,564 | 21.65   | 5.39   | -4.016697588  | 0        |
| NEIL1    | 3,116 | 33.85   | 5.67   | -5.970017637  | 0        |
| NEK3     | 2,509 | 10.73   | 2.82   | -3.804964539  | 0        |
| NEU4     | 2,302 | 6.23    | 0.14   | -44.5         | 0        |
| NFATC1   | 9,681 | 6.74    | 3.26   | -2.067484663  | 0        |
| NFE2L2   | 2,408 | 36.77   | 8.78   | -4.187927107  | 0        |
| NFKBIA   | 1.55  | 96.00   | 43.15  | -2.224797219  | 0        |
| NFKBIZ   | 4.7   | 13.85   | 2.48   | -5.584677419  | 0        |
| NKD2     | 1,798 | 3.41    | 0.33   | -10.333333333 | 3.10E-14 |
| NKTR     | 10.3  | 35.40   | 4.65   | -7.612903226  | 0        |
| NLGN3    | 3,895 | 2.84    | 0.35   | -8.114285714  | 0        |
| NLRP1    | 7,096 | 28.91   | 6.35   | -4.552755906  | 0        |
| NMT2     | 2,837 | 2.44    | 0.65   | -3.753846154  | 2.36E-09 |
| NNAT     | 1,304 | 5.23    | 0.32   | -16.34375     | 0        |
| NOD1     | 9,457 | 12.93   | 2.54   | -5.090551181  | 0        |
| NPC1     | 0.1   | 1251.55 | 483.51 | -2.588467664  | 0        |
| NPEPL1   | 2,186 | 16.70   | 6.90   | -2.420289855  | 0        |
| NPHP3    | 5.37  | 2.34    | 1.05   | -2.228571429  | 4.12E-08 |
| NR1D2    | 4,331 | 6.05    | 0.99   | -6.111111111  | 0        |
| NR2C1    | 2,632 | 9.14    | 4.13   | -2.213075061  | 7.60E-14 |
| NR2C2    | 8.33  | 13.10   | 5.11   | -2.563600783  | 0        |
| NR4A1    | 4.51  | 27.16   | 1.57   | -17.29936306  | 0        |
| NR4A2    | 6,229 | 4.88    | 1.09   | -4.47706422   | 0        |
| NRBP2    | 3,491 | 6.60    | 0.77   | -8.571428571  | 0        |
| NRN1     | 2,819 | 46.36   | 18.37  | -2.523679913  | 0        |
| NRXN3    | 8,019 | 11.41   | 4.11   | -2.776155718  | 0        |
| NSUN6    | 2.2   | 3.78    | 1.30   | -2.907692308  | 4.48E-08 |
| NT5C3    | 4,028 | 5.13    | 1.88   | -2.728723404  | 0        |
| NT5E     | 5,707 | 27.76   | 12.55  | -2.211952191  | 0        |
| NUAK2    | 3,401 | 3.06    | 0.14   | -21.85714286  | 0        |
| NUDT4    | 8,198 | 106.04  | 15.45  | -6.863430421  | 0        |
| NUDT4P1  | 2,565 | 140.71  | 26.80  | -5.250373134  | 0        |



|             |        |       |       |              |          |
|-------------|--------|-------|-------|--------------|----------|
| NUP153      | 6,013  | 25.13 | 6.86  | -3.663265306 | 0        |
| OGFRL1      | 3,821  | 24.67 | 8.18  | -3.015892421 | 0        |
| OGT         | 9,063  | 66.06 | 32.08 | -2.059226933 | 0        |
| OPA1        | 6,029  | 10.41 | 5.03  | -2.069582505 | 0        |
| OR2AE1      | 1,944  | 2.70  | 0.52  | -5.192307692 | 5.08E-09 |
| OR7A10      | 1,358  | 12.97 | 0.00  | -12.97       | 0        |
| OR7A5       | 2,138  | 97.82 | 3.35  | -29.2        | 0        |
| OSGIN2      | 4.2    | 3.30  | 1.58  | -2.088607595 | 8.44E-08 |
| OTUD1       | 3,512  | 7.38  | 3.58  | -2.061452514 | 5.99E-13 |
| P2RX5       | 2,568  | 6.17  | 0.82  | -7.524390244 | 0        |
| PAFAH1B2    | 2,611  | 28.99 | 13.92 | -2.082614943 | 0        |
| PAG1        | 10,744 | 9.75  | 2.46  | -3.963414634 | 0        |
| PALM2-AKAP2 | 9,219  | 4.55  | 1.85  | -2.459459459 | 0        |
| PAN3        | 5,333  | 35.01 | 8.38  | -4.177804296 | 0        |
| PANK3       | 4,488  | 6.22  | 1.93  | -3.222797927 | 0        |
| PAPD1       | 2,572  | 11.54 | 3.54  | -3.259887006 | 0        |
| PAQR6       | 3,709  | 11.50 | 2.61  | -4.406130268 | 0        |
| PARP15      | 3,751  | 39.56 | 8.64  | -4.578703704 | 0        |
| PARP8       | 3,205  | 13.55 | 4.27  | -3.173302108 | 0        |
| PBEF1       | 4,752  | 4.79  | 1.99  | -2.407035176 | 3.00E-15 |
| PBLD        | 2,917  | 3.05  | 0.75  | -4.066666667 | 1.18E-11 |
| PBX4        | 1,438  | 6.47  | 0.29  | -22.31034483 | 0        |
| PCGF3       | 6,876  | 15.22 | 5.13  | -2.966861598 | 0        |
| PCMTD1      | 6.62   | 13.33 | 5.00  | -2.666       | 0        |
| PCP2        | 1,223  | 16.50 | 6.83  | -2.415812592 | 1.06E-13 |
| PCTK1       | 3,704  | 26.90 | 12.03 | -2.236076475 | 0        |
| PCTK2       | 4.29   | 4.34  | 1.33  | -3.263157895 | 0        |
| PCTP        | 1,933  | 11.62 | 4.84  | -2.400826446 | 6.00E-15 |
| PDCD1       | 2,107  | 2.53  | 0.24  | -10.54166667 | 1.84E-12 |
| PDE2A       | 4.23   | 11.58 | 0.14  | -82.71428571 | 0        |
| PDE3B       | 4,774  | 3.81  | 0.07  | -54.42857143 | 0        |
| PDE4A       | 4,256  | 1.42  | 0.36  | -3.944444444 | 2.15E-08 |
| PDE4B       | 5,326  | 36.02 | 15.83 | -2.275426406 | 0        |
| PDE4D       | 5,876  | 2.28  | 0.44  | -5.181818182 | 0        |
| PDE8A       | 5,021  | 7.80  | 1.36  | -5.735294118 | 0        |
| PDE9A       | 2,636  | 7.39  | 1.76  | -4.198863636 | 0        |
| PDK1        | 4,576  | 3.87  | 1.86  | -2.080645161 | 2.01E-09 |

|         |        |        |       |              |          |
|---------|--------|--------|-------|--------------|----------|
| PDZD2   | 11,751 | 1.57   | 0.03  | -52.33333333 | 0        |
| PEAR1   | 5,435  | 38.63  | 15.58 | -2.479460847 | 0        |
| PEG10   | 13,232 | 11.87  | 0.00  | -11.87       | 0        |
| PELI1   | 9,362  | 46.00  | 0.94  | -48.93617021 | 0        |
| PELI2   | 5,696  | 2.59   | 0.00  | -2.59        | 0        |
| PER1    | 8,699  | 160.74 | 8.59  | -18.71245634 | 0        |
| PERQ1   | 13,386 | 27.38  | 9.24  | -2.963203463 | 0        |
| PFKFB2  | 9,143  | 6.61   | 0.69  | -9.579710145 | 0        |
| PFKFB3  | 4,482  | 13.38  | 2.42  | -5.52892562  | 0        |
| PGAM2   | 2,282  | 6.24   | 1.77  | -3.525423729 | 1.00E-15 |
| PGAP1   | 11,113 | 1.08   | 0.46  | -2.347826087 | 2.18E-08 |
| PHC3    | 3,964  | 14.15  | 5.33  | -2.65478424  | 0        |
| PHF10   | 4,376  | 29.66  | 13.36 | -2.22005988  | 0        |
| PHF16   | 5,141  | 6.29   | 2.82  | -2.230496454 | 0        |
| PHF3    | 6,947  | 27.59  | 7.27  | -3.795048143 | 0        |
| PHIP    | 6,655  | 9.19   | 3.50  | -2.625714286 | 0        |
| PHLPPL  | 7,919  | 1.84   | 0.60  | -3.066666667 | 3.60E-14 |
| PI4K2B  | 3,674  | 4.84   | 2.34  | -2.068376068 | 3.12E-09 |
| PICK1   | 8,247  | 43.40  | 11.46 | -3.787085515 | 0        |
| PIGA    | 6,093  | 1.34   | 0.32  | -4.1875      | 2.25E-11 |
| PIGL    | 1,123  | 5.72   | 0.75  | -7.626666667 | 5.72E-13 |
| PIK3C2A | 5,061  | 3.81   | 1.01  | -3.772277228 | 0        |
| PIK3CA  | 4,411  | 29.41  | 3.79  | -7.759894459 | 0        |
| PIK3R1  | 7,157  | 26.64  | 5.87  | -4.538330494 | 0        |
| PIP5K3  | 10,547 | 7.39   | 3.08  | -2.399350649 | 0        |
| PITPNM2 | 6,736  | 13.30  | 0.85  | -15.64705882 | 0        |
| PITX1   | 2,362  | 4.48   | 0.21  | -21.33333333 | 0        |
| PKD1P6  | 29,386 | 0.90   | 0.24  | -3.75        | 0        |
| PKD2    | 5,056  | 9.59   | 3.95  | -2.427848101 | 0        |
| PKN2    | 4,198  | 16.00  | 2.69  | -5.94795539  | 0        |
| PLAGL2  | 5,641  | 23.30  | 7.02  | -3.319088319 | 0        |
| PLCB2   | 4.52   | 12.61  | 5.03  | -2.50695825  | 0        |
| PLCG1   | 6.8    | 32.14  | 4.37  | -7.354691076 | 0        |
| PLDN    | 3,941  | 10.17  | 4.93  | -2.062880325 | 0        |
| PLEC1   | 16,296 | 8.52   | 3.61  | -2.360110803 | 0        |
| PLEKHA8 | 4,177  | 1.42   | 0.15  | -9.466666667 | 1.11E-13 |
| PLEKHC1 | 3,226  | 2.60   | 0.63  | -4.126984127 | 2.09E-11 |

|          |        |        |       |              |          |
|----------|--------|--------|-------|--------------|----------|
| PLEKHF2  | 2,882  | 23.76  | 8.39  | -2.831942789 | 0        |
| PLEKHG1  | 8,471  | 5.56   | 0.81  | -6.864197531 | 0        |
| PLK2     | 2,786  | 3.88   | 1.48  | -2.621621622 | 4.33E-09 |
| PLK3     | 2,358  | 16.28  | 7.39  | -2.202976996 | 0        |
| PMAIP1   | 3,101  | 44.80  | 6.24  | -7.179487179 | 0        |
| PNMT     | 1,157  | 7.79   | 1.39  | -5.604316547 | 2.00E-15 |
| PNN      | 2,598  | 159.45 | 54.18 | -2.942967885 | 0        |
| POLK     | 4,075  | 4.95   | 1.63  | -3.036809816 | 0        |
| POLR3F   | 2,154  | 8.31   | 3.13  | -2.654952077 | 4.80E-14 |
| POLS     | 4,509  | 14.00  | 3.08  | -4.545454545 | 0        |
| PON2     | 5,319  | 37.61  | 14.70 | -2.558503401 | 0        |
| POU2F1   | 2,949  | 4.53   | 2.10  | -2.157142857 | 5.98E-08 |
| POU3F3   | 1,946  | 5.74   | 0.28  | -20.5        | 0        |
| PPARD    | 5,999  | 27.28  | 7.35  | -3.711564626 | 0        |
| PPM1A    | 4,098  | 31.15  | 7.16  | -4.350558659 | 0        |
| PPM1B    | 7,298  | 12.86  | 5.63  | -2.284191829 | 0        |
| PPP1CB   | 9,652  | 26.37  | 6.95  | -3.794244604 | 0        |
| PPP1R16B | 6,251  | 127.56 | 16.67 | -7.652069586 | 0        |
| PPP1R2   | 3,313  | 9.50   | 4.73  | -2.00845666  | 1.70E-14 |
| PPP2R5A  | 4.03   | 41.22  | 12.42 | -3.31884058  | 0        |
| PPP3R1   | 3,011  | 32.07  | 13.54 | -2.368537666 | 0        |
| PPP4R1L  | 2,325  | 6.43   | 0.61  | -10.54098361 | 0        |
| PPP4R2   | 1,575  | 8.98   | 3.63  | -2.473829201 | 1.51E-10 |
| PPTC7    | 4,084  | 11.78  | 4.13  | -2.852300242 | 0        |
| PRDM1    | 5,319  | 11.29  | 0.97  | -11.63917526 | 0        |
| PRDM2    | 11,971 | 36.21  | 4.18  | -8.662679426 | 0        |
| PRF1     | 2,491  | 6.95   | 3.28  | -2.118902439 | 1.66E-09 |
| PRIC285  | 10.91  | 2.52   | 0.77  | -3.272727273 | 0        |
| PRKAA1   | 5,398  | 7.75   | 3.37  | -2.299703264 | 0        |
| PRKAB2   | 5,423  | 5.43   | 1.23  | -4.414634146 | 0        |
| PRKD3    | 5,903  | 13.47  | 6.24  | -2.158653846 | 0        |
| PRKRIP1  | 4,346  | 14.25  | 6.26  | -2.276357827 | 0        |
| PRKX     | 7,549  | 47.76  | 3.34  | -14.2994012  | 0        |
| PRO2266  | 0.914  | 24.35  | 4.24  | -5.742924528 | 0        |
| PRPF40A  | 8.28   | 13.70  | 6.31  | -2.171156894 | 0        |
| PRPF4B   | 7.94   | 14.62  | 6.79  | -2.153166421 | 0        |
| PRR8     | 8.72   | 8.17   | 2.24  | -3.647321429 | 0        |

|           |        |        |       |              |          |
|-----------|--------|--------|-------|--------------|----------|
| PRRT2     | 2,372  | 2.25   | 0.14  | -16.07142857 | 7.00E-15 |
| PSCD1     | 7,488  | 132.95 | 46.79 | -2.841419107 | 0        |
| PSCD3     | 10,086 | 13.92  | 4.59  | -3.032679739 | 0        |
| PSCDBP    | 2,643  | 44.62  | 2.59  | -17.22779923 | 0        |
| PSMB7     | 0.984  | 69.88  | 32.65 | -2.140275651 | 0        |
| PSMD12    | 3,592  | 9.73   | 4.65  | -2.092473118 | 0        |
| PSME4     | 7,132  | 16.20  | 4.84  | -3.347107438 | 0        |
| PSTPIP1   | 2,156  | 10.92  | 4.58  | -2.384279476 | 2.00E-15 |
| PTAR1     | 1,834  | 9.49   | 1.25  | -7.592       | 0        |
| PTBP2     | 3,427  | 15.99  | 1.73  | -9.242774566 | 0        |
| PTGER4    | 3,416  | 1.74   | 0.25  | -6.96        | 6.68E-12 |
| PTPN12    | 6,859  | 24.70  | 8.49  | -2.909305065 | 0        |
| PTPRE     | 7,946  | 37.64  | 10.44 | -3.605363985 | 0        |
| PTPRO     | 8,003  | 1.08   | 0.22  | -4.909090909 | 6.90E-14 |
| PTS       | 1,315  | 16.85  | 4.48  | -3.761160714 | 0        |
| PUS7      | 7,908  | 3.08   | 1.32  | -2.333333333 | 2.00E-15 |
| PXN       | 3,611  | 17.34  | 8.63  | -2.009269988 | 0        |
| QSCN6L1   | 6,775  | 27.53  | 3.80  | -7.244736842 | 0        |
| RAB11FIP2 | 6,059  | 3.51   | 1.03  | -3.40776699  | 0        |
| RAB11FIP4 | 8,625  | 2.60   | 0.44  | -5.909090909 | 0        |
| RAB11FIP5 | 4.34   | 30.02  | 11.74 | -2.557069847 | 0        |
| RAB12     | 10,021 | 14.22  | 0.33  | -43.09090909 | 0        |
| RAB17     | 2,616  | 12.48  | 0.85  | -14.68235294 | 0        |
| RAB18     | 3,105  | 15.01  | 4.96  | -3.026209677 | 0        |
| RAB30     | 1,602  | 8.27   | 0.74  | -11.17567568 | 0        |
| RAB3GAP2  | 5,121  | 5.76   | 2.52  | -2.285714286 | 0        |
| RABGGTB   | 2,858  | 25.03  | 8.22  | -3.045012165 | 0        |
| RANBP2    | 11,308 | 10.90  | 4.81  | -2.266112266 | 0        |
| RANBP20P  | 2,337  | 6.39   | 1.73  | -3.693641618 | 0        |
| RANBP6    | 4.6    | 10.26  | 3.84  | -2.671875    | 0        |
| RANBP9    | 3,424  | 31.38  | 15.04 | -2.08643617  | 0        |
| RAP2C     | 3,933  | 5.51   | 2.35  | -2.344680851 | 5.00E-14 |
| RAPGEF1   | 8,206  | 40.08  | 12.64 | -3.170886076 | 0        |
| RAPGEF2   | 9,329  | 15.47  | 1.86  | -8.317204301 | 0        |
| RAPGEF5   | 9,932  | 14.01  | 3.04  | -4.608552632 | 0        |
| RASA2     | 2,804  | 8.33   | 1.85  | -4.502702703 | 0        |
| RASA3     | 5.86   | 21.90  | 10.37 | -2.111861138 | 0        |

|         |        |        |       |              |          |
|---------|--------|--------|-------|--------------|----------|
| RASAL2  | 7,201  | 12.03  | 3.60  | -3.341666667 | 0        |
| RASL10A | 2,548  | 6.44   | 2.31  | -2.787878788 | 4.10E-14 |
| RB1CC1  | 6,912  | 15.49  | 2.54  | -6.098425197 | 0        |
| RBAK    | 8,458  | 1.80   | 0.51  | -3.529411765 | 0        |
| RBM15   | 3,604  | 9.83   | 2.16  | -4.550925926 | 0        |
| RBM16   | 5,004  | 32.46  | 13.47 | -2.409799555 | 0        |
| RBM25   | 5,397  | 33.78  | 16.55 | -2.041087613 | 0        |
| RBM3    | 2,564  | 91.91  | 34.26 | -2.682720374 | 0        |
| RBM33   | 14,325 | 14.65  | 3.15  | -4.650793651 | 0        |
| RBM38   | 4,714  | 222.91 | 49.95 | -4.462662663 | 0        |
| RBM7    | 1,917  | 8.31   | 3.69  | -2.25203252  | 6.94E-10 |
| RBMS2   | 3,478  | 12.71  | 2.82  | -4.507092199 | 0        |
| RBPJ    | 6,232  | 38.18  | 9.42  | -4.053078556 | 0        |
| RC3H1   | 6,968  | 5.94   | 1.15  | -5.165217391 | 0        |
| RC3H2   | 3,532  | 11.60  | 4.67  | -2.483940043 | 0        |
| RCBTB1  | 5,932  | 40.41  | 17.32 | -2.333140878 | 0        |
| RCN2    | 4,975  | 102.80 | 18.87 | -5.447800742 | 0        |
| RCOR3   | 4,513  | 13.33  | 4.73  | -2.818181818 | 0        |
| REL     | 3,242  | 11.66  | 0.94  | -12.40425532 | 0        |
| RERE    | 8,841  | 45.34  | 18.54 | -2.445523193 | 0        |
| REV1    | 4.84   | 11.65  | 4.84  | -2.407024793 | 0        |
| RFXDC2  | 7,085  | 8.63   | 4.08  | -2.115196078 | 0        |
| Rgr     | 3.91   | 13.03  | 3.12  | -4.176282051 | 0        |
| RGS2    | 1,344  | 7.36   | 1.00  | -7.36        | 0        |
| RHOH    | 1,498  | 38.24  | 17.32 | -2.207852194 | 0        |
| RHOQ    | 2,127  | 5.30   | 1.27  | -4.173228346 | 7.00E-15 |
| RICTOR  | 9,535  | 11.04  | 0.71  | -15.54929577 | 0        |
| RIF1    | 8,621  | 4.90   | 1.75  | -2.8         | 0        |
| RIN3    | 3,849  | 12.62  | 4.14  | -3.048309179 | 0        |
| RINT1   | 5,952  | 3.96   | 1.46  | -2.712328767 | 0        |
| RIOK3   | 5,659  | 14.69  | 5.97  | -2.460636516 | 0        |
| RIPK2   | 2,585  | 14.12  | 4.17  | -3.386091127 | 0        |
| RIPK4   | 3,872  | 4.65   | 0.13  | -35.76923077 | 0        |
| RIT1    | 3,425  | 14.19  | 5.86  | -2.421501706 | 0        |
| RKHD2   | 3,473  | 15.24  | 6.24  | -2.442307692 | 0        |
| RLF     | 6,228  | 21.73  | 1.83  | -11.87431694 | 0        |
| RNF103  | 5,402  | 22.49  | 1.28  | -17.5703125  | 0        |

|               |       |        |       |              |          |
|---------------|-------|--------|-------|--------------|----------|
| RNF11         | 3,139 | 15.95  | 5.88  | -2.712585034 | 0        |
| RNF12         | 6,821 | 19.74  | 3.52  | -5.607954545 | 0        |
| RNF126        | 2,195 | 31.10  | 14.93 | -2.083054253 | 0        |
| RNF149        | 3,393 | 18.28  | 3.57  | -5.120448179 | 0        |
| RNF169        | 8.9   | 4.83   | 1.51  | -3.198675497 | 0        |
| RNF19         | 4,809 | 26.02  | 3.88  | -6.706185567 | 0        |
| RNF24         | 1,909 | 5.75   | 2.43  | -2.366255144 | 1.13E-07 |
| RNF38         | 5,756 | 11.08  | 3.38  | -3.278106509 | 0        |
| RNF43         | 6,006 | 1.52   | 0.04  | -38          | 0        |
| RNF7          | 3.01  | 26.53  | 10.13 | -2.618953603 | 0        |
| RNMT          | 6,203 | 10.96  | 3.82  | -2.869109948 | 0        |
| ROCK1         | 4,513 | 20.26  | 6.57  | -3.083713851 | 0        |
| RP11-162I21.1 | 3,037 | 17.95  | 8.46  | -2.121749409 | 0        |
| RP11-298P3.3  | 3,669 | 9.03   | 3.84  | -2.3515625   | 0        |
| RP11-50D16.3  | 3,549 | 5.04   | 1.61  | -3.130434783 | 0        |
| RP11-92J19.4  | 1,419 | 12.06  | 4.34  | -2.778801843 | 1.40E-14 |
| RP3-402G11.5  | 6,668 | 51.74  | 13.39 | -3.86407767  | 0        |
| RP4-747L4.3   | 4,154 | 17.86  | 3.45  | -5.176811594 | 0        |
| RP5-1022P6.2  | 5,047 | 22.90  | 8.13  | -2.816728167 | 0        |
| RPAIN         | 4,757 | 34.55  | 7.07  | -4.886845827 | 0        |
| RPGR          | 6,571 | 1.87   | 0.81  | -2.308641975 | 2.55E-08 |
| RPP14         | 1,872 | 7.35   | 2.88  | -2.552083333 | 1.21E-10 |
| RPS4Y2        | 0.79  | 206.39 | 56.62 | -3.645178382 | 0        |
| RPS6KB1       | 5,319 | 16.35  | 2.37  | -6.898734177 | 0        |
| RREB1         | 8,352 | 15.05  | 6.83  | -2.203513909 | 0        |
| RSC1A1        | 5,424 | 22.38  | 4.84  | -4.623966942 | 0        |
| RSF1          | 5,134 | 8.58   | 2.69  | -3.189591078 | 0        |
| RSRC2         | 4,097 | 39.39  | 16.80 | -2.344642857 | 0        |
| RUFY2         | 2,701 | 4.98   | 1.84  | -2.706521739 | 2.72E-11 |
| RUNDC2A       | 2,248 | 2.90   | 0.45  | -6.444444444 | 5.37E-12 |
| RYBP          | 2,914 | 18.10  | 8.49  | -2.131919906 | 0        |
| S100A10       | 0.639 | 32.36  | 7.38  | -4.384823848 | 0        |
| SAMD8         | 3,303 | 13.66  | 2.80  | -4.878571429 | 0        |
| SAP30         | 1,391 | 102.35 | 18.31 | -5.589841617 | 0        |
| SAR1A         | 2,986 | 26.67  | 11.37 | -2.345646438 | 0        |
| SAT1          | 2,471 | 158.28 | 27.54 | -5.747276688 | 0        |
| SBDS          | 3.21  | 16.58  | 7.50  | -2.210666667 | 0        |

|          |        |        |       |              |          |
|----------|--------|--------|-------|--------------|----------|
| SBDSP    | 10.68  | 1.42   | 0.53  | -2.679245283 | 2.13E-12 |
| SBF2     | 7,405  | 6.11   | 2.08  | -2.9375      | 0        |
| SC5DL    | 2,993  | 31.90  | 4.26  | -7.488262911 | 0        |
| SCML1    | 3,392  | 2.24   | 0.05  | -44.8        | 0        |
| SDCCAG1  | 4,121  | 13.23  | 5.03  | -2.630218688 | 0        |
| SDHALP1  | 3,157  | 7.24   | 2.83  | -2.558303887 | 0        |
| SDHALP2  | 46,009 | 1.47   | 0.38  | -3.868421053 | 0        |
| SDHAP3   | 23,621 | 1.18   | 0.52  | -2.269230769 | 0        |
| SEC24B   | 4,743  | 15.50  | 5.06  | -3.063241107 | 0        |
| SEC31B   | 5.11   | 15.28  | 4.38  | -3.488584475 | 0        |
| SEC61A2  | 2,608  | 17.49  | 5.41  | -3.232902033 | 0        |
| SECISBP2 | 4,383  | 13.88  | 5.49  | -2.528233151 | 0        |
| SELI     | 8,093  | 3.12   | 1.25  | -2.496       | 0        |
| SEMA6A   | 15,453 | 50.66  | 1.22  | -41.52459016 | 0        |
| SENP2    | 3,198  | 14.75  | 4.77  | -3.092243187 | 0        |
| SENP5    | 4,093  | 9.57   | 2.17  | -4.410138249 | 0        |
| SENP7    | 4,732  | 4.73   | 1.43  | -3.307692308 | 0        |
| SERINC1  | 3,128  | 52.47  | 12.90 | -4.06744186  | 0        |
| SERINC2  | 1,997  | 5.80   | 0.59  | -9.830508475 | 0        |
| SERINC5  | 4,747  | 26.30  | 8.30  | -3.168674699 | 0        |
| SERPINA1 | 2,154  | 6.29   | 2.51  | -2.505976096 | 3.85E-10 |
| SERPINB9 | 5,264  | 31.05  | 6.44  | -4.821428571 | 0        |
| SESN1    | 3,724  | 72.98  | 7.36  | -9.91576087  | 0        |
| SESN3    | 4,591  | 14.07  | 3.59  | -3.919220056 | 0        |
| SESTD1   | 3,834  | 20.74  | 3.33  | -6.228228228 | 0        |
| SETD1B   | 8,531  | 12.50  | 4.61  | -2.711496746 | 0        |
| SETD5    | 15,941 | 22.51  | 8.37  | -2.689366786 | 0        |
| SETD7    | 8,583  | 14.40  | 3.31  | -4.350453172 | 0        |
| SF3B1    | 5,161  | 166.89 | 45.80 | -3.643886463 | 0        |
| SFMBT1   | 4,677  | 17.92  | 3.90  | -4.594871795 | 0        |
| SFMBT2   | 5,742  | 5.93   | 1.08  | -5.490740741 | 0        |
| SFRS12   | 4.77   | 32.07  | 11.75 | -2.729361702 | 0        |
| SFRS14   | 7,251  | 37.05  | 17.07 | -2.170474517 | 0        |
| SFXN1    | 6,951  | 102.58 | 10.68 | -9.604868914 | 0        |
| SFXN5    | 4.14   | 8.32   | 3.20  | -2.6         | 0        |
| SGK      | 2,371  | 4.92   | 1.39  | -3.539568345 | 2.03E-13 |
| SGPP1    | 3,309  | 3.86   | 1.68  | -2.297619048 | 2.07E-08 |

|          |        |        |        |              |          |
|----------|--------|--------|--------|--------------|----------|
| SGTB     | 2,649  | 2.84   | 0.57   | -4.98245614  | 1.62E-12 |
| SH3D19   | 5,373  | 1.29   | 0.14   | -9.214285714 | 1.00E-15 |
| SH3GLP2  | 24,523 | 0.46   | 0.05   | -9.2         | 0        |
| SH3RF1   | 5,265  | 6.09   | 1.30   | -4.684615385 | 0        |
| SH3TC1   | 9.93   | 73.70  | 36.26  | -2.032542747 | 0        |
| SHFM3P1  | 2.39   | 22.94  | 3.42   | -6.707602339 | 0        |
| SIAH1    | 4.39   | 13.72  | 2.96   | -4.635135135 | 0        |
| SIAH2    | 2.62   | 30.93  | 9.03   | -3.425249169 | 0        |
| SKI      | 6,888  | 35.87  | 5.57   | -6.439856373 | 0        |
| SKIL     | 3,059  | 5.11   | 1.07   | -4.775700935 | 0        |
| SLA      | 2,667  | 5.72   | 0.70   | -8.171428571 | 0        |
| SLA/LP   | 3,363  | 4.27   | 0.82   | -5.207317073 | 0        |
| SLC11A1  | 2,567  | 2.54   | 0.39   | -6.512820513 | 1.33E-12 |
| SLC11A2  | 4,105  | 7.52   | 2.01   | -3.741293532 | 0        |
| SLC12A6  | 4,882  | 23.61  | 4.99   | -4.731462926 | 0        |
| SLC16A3  | 3,625  | 46.75  | 20.10  | -2.325870647 | 0        |
| SLC16A8  | 2,073  | 5.78   | 1.75   | -3.302857143 | 7.91E-13 |
| SLC23A1  | 2,388  | 6.21   | 2.18   | -2.848623853 | 3.30E-13 |
| SLC25A14 | 1,914  | 29.05  | 3.40   | -8.544117647 | 0        |
| SLC25A28 | 2,516  | 39.84  | 18.02  | -2.210876804 | 0        |
| SLC25A32 | 3,069  | 9.06   | 3.58   | -2.530726257 | 0        |
| SLC25A36 | 4,169  | 19.79  | 7.19   | -2.752433936 | 0        |
| SLC2A3   | 3,914  | 26.52  | 9.88   | -2.684210526 | 0        |
| SLC2A5   | 2,322  | 468.22 | 202.52 | -2.311969188 | 0        |
| SLC30A7  | 5,867  | 2.35   | 0.62   | -3.790322581 | 0        |
| SLC31A2  | 1,693  | 34.95  | 3.54   | -9.872881356 | 0        |
| SLC35A3  | 2,348  | 3.83   | 1.33   | -2.879699248 | 1.82E-08 |
| SLC35D1  | 1,936  | 7.21   | 1.12   | -6.4375      | 0        |
| SLC38A2  | 5,363  | 43.58  | 20.93  | -2.082178691 | 0        |
| SLC43A2  | 3,001  | 8.97   | 4.21   | -2.13064133  | 2.90E-14 |
| SLC9A3   | 3,538  | 5.34   | 0.55   | -9.709090909 | 0        |
| SLC9A8   | 6,255  | 5.72   | 2.44   | -2.344262295 | 0        |
| SLU7     | 2.24   | 31.80  | 15.07  | -2.110152621 | 0        |
| SMAD1    | 3.12   | 14.62  | 3.70   | -3.951351351 | 0        |
| SMAD3    | 7,743  | 33.38  | 14.86  | -2.246298789 | 0        |
| SMAD5    | 7,095  | 2.76   | 1.05   | -2.628571429 | 4.00E-15 |
| SMARCA2  | 9,544  | 85.90  | 28.13  | -3.053679346 | 0        |



|         |        |        |       |              |          |
|---------|--------|--------|-------|--------------|----------|
| SMCHD1  | 9,796  | 29.17  | 4.15  | -7.028915663 | 0        |
| SMCR8   | 4,839  | 13.00  | 2.05  | -6.341463415 | 0        |
| SMEK1   | 4,779  | 28.49  | 10.56 | -2.697916667 | 0        |
| SMURF1  | 13,471 | 14.89  | 2.99  | -4.97993311  | 0        |
| SMURF2  | 3,866  | 5.99   | 2.35  | -2.54893617  | 0        |
| SNED1   | 6,834  | 1.16   | 0.17  | -6.823529412 | 1.00E-15 |
| SNF1LK  | 4,712  | 23.37  | 11.42 | -2.046409807 | 0        |
| SNIP1   | 2,471  | 14.93  | 2.66  | -5.612781955 | 0        |
| SNN     | 3,274  | 21.30  | 5.35  | -3.981308411 | 0        |
| SNORD22 | 0.785  | 126.41 | 43.66 | -2.895327531 | 0        |
| SNORD25 | 0.249  | 19.47  | 2.52  | -7.726190476 | 1.23E-10 |
| SNORD28 | 0.519  | 14.49  | 1.68  | -8.625       | 0        |
| SNORD31 | 0.614  | 22.24  | 3.37  | -6.599406528 | 0        |
| SNORD60 | 0.339  | 75.88  | 33.29 | -2.279363172 | 2.00E-15 |
| SNRK    | 5,119  | 25.55  | 5.69  | -4.490333919 | 0        |
| SNRPA1  | 2,182  | 34.28  | 7.96  | -4.306532663 | 0        |
| SNX30   | 7,584  | 14.87  | 0.82  | -18.13414634 | 0        |
| SNX9    | 7.18   | 35.13  | 6.14  | -5.721498371 | 0        |
| SOCS4   | 7,013  | 3.26   | 0.98  | -3.326530612 | 0        |
| SOCS5   | 4,662  | 6.75   | 2.02  | -3.341584158 | 0        |
| SOD2    | 2,995  | 63.39  | 13.47 | -4.706013363 | 0        |
| SORL1   | 8,936  | 12.53  | 4.55  | -2.753846154 | 0        |
| SP3     | 6,125  | 14.99  | 7.45  | -2.012080537 | 0        |
| SPAG9   | 6,834  | 12.22  | 3.09  | -3.954692557 | 0        |
| SPATA2  | 4,045  | 5.92   | 2.86  | -2.06993007  | 3.09E-12 |
| SPEN    | 12,935 | 23.06  | 8.80  | -2.620454545 | 0        |
| SPRY1   | 3,819  | 11.39  | 3.84  | -2.966145833 | 0        |
| SPTY2D1 | 5,734  | 3.87   | 1.75  | -2.211428571 | 6.99E-13 |
| SSFA2   | 4,961  | 6.58   | 3.03  | -2.171617162 | 0        |
| SSH2    | 11,183 | 22.10  | 10.75 | -2.055813953 | 0        |
| SSPO    | 12.25  | 0.76   | 0.20  | -3.8         | 9.00E-12 |
| ST3GAL1 | 7,745  | 32.50  | 13.39 | -2.427184466 | 0        |
| STAG3   | 9,536  | 54.03  | 24.80 | -2.178629032 | 0        |
| STAM    | 2,966  | 36.16  | 6.85  | -5.278832117 | 0        |
| STARD9  | 15,083 | 4.92   | 0.74  | -6.648648649 | 0        |
| STAT5A  | 4,298  | 29.63  | 10.78 | -2.748608534 | 0        |
| STK17B  | 2,938  | 38.35  | 15.26 | -2.51310616  | 0        |

|          |        |       |       |              |          |
|----------|--------|-------|-------|--------------|----------|
| STK35    | 6,015  | 10.03 | 2.27  | -4.418502203 | 0        |
| STX12    | 2,847  | 19.63 | 5.06  | -3.87944664  | 0        |
| STX16    | 5,029  | 43.04 | 16.47 | -2.613236187 | 0        |
| SUZ12P   | 38.28  | 0.94  | 0.27  | -3.481481481 | 0        |
| SWAP70   | 6,114  | 25.41 | 6.14  | -4.138436482 | 0        |
| SYAP1    | 2,023  | 14.87 | 6.70  | -2.219402985 | 0        |
| SYF2     | 1.77   | 64.67 | 19.04 | -3.396533613 | 0        |
| SYNJ1    | 10,147 | 1.85  | 0.76  | -2.434210526 | 4.55E-13 |
| SYTL3    | 2,223  | 8.54  | 0.34  | -25.11764706 | 0        |
| TAF11    | 1,994  | 32.95 | 11.86 | -2.778246206 | 0        |
| TAGLN    | 2,028  | 5.17  | 1.72  | -3.005813953 | 2.13E-10 |
| TA-NFKBH | 1,834  | 7.66  | 1.24  | -6.177419355 | 0        |
| TAPT1    | 6,089  | 55.94 | 11.64 | -4.805841924 | 0        |
| TARBP1   | 6,357  | 23.81 | 6.73  | -3.537890045 | 0        |
| TARDBP   | 4,217  | 54.31 | 26.44 | -2.05408472  | 0        |
| TBC1D15  | 3,871  | 30.08 | 6.56  | -4.585365854 | 0        |
| TBC1D23  | 2,257  | 6.97  | 2.61  | -2.670498084 | 6.98E-13 |
| TBC1D8   | 3,966  | 7.46  | 3.33  | -2.24024024  | 0        |
| TBL1XR1  | 6,268  | 14.21 | 5.57  | -2.551166966 | 0        |
| TBRG1    | 4,458  | 13.49 | 5.35  | -2.521495327 | 0        |
| TCAP     | 0.963  | 17.26 | 4.72  | -3.656779661 | 0        |
| TCF7     | 6,912  | 8.39  | 1.77  | -4.740112994 | 0        |
| TCP11L2  | 3,736  | 29.45 | 2.05  | -14.36585366 | 0        |
| TFIP11   | 3,458  | 56.57 | 26.69 | -2.11952042  | 0        |
| TGFBRAP1 | 4,748  | 21.98 | 4.93  | -4.45841785  | 0        |
| THAP9    | 4,613  | 4.47  | 1.23  | -3.634146341 | 0        |
| THRAP1   | 7,834  | 13.73 | 4.36  | -3.149082569 | 0        |
| THRAP2   | 11,353 | 42.72 | 16.05 | -2.661682243 | 0        |
| THSD1P   | 30,249 | 1.79  | 0.44  | -4.068181818 | 0        |
| TIAM2    | 6,224  | 12.00 | 4.84  | -2.479338843 | 0        |
| TIMP3    | 5,486  | 19.40 | 1.06  | -18.30188679 | 0        |
| TIPARP   | 3,836  | 6.40  | 2.02  | -3.168316832 | 0        |
| TJP2     | 6,041  | 20.41 | 10.01 | -2.038961039 | 0        |
| TLE1     | 3,892  | 47.31 | 22.62 | -2.091511936 | 0        |
| TLK2     | 3,604  | 8.32  | 4.12  | -2.019417476 | 4.50E-14 |
| TLR2     | 3,403  | 3.37  | 1.36  | -2.477941176 | 1.04E-08 |
| TMEM110  | 4,966  | 16.93 | 5.82  | -2.908934708 | 0        |

|           |        |        |       |              |          |
|-----------|--------|--------|-------|--------------|----------|
| TMEM156   | 2,276  | 21.17  | 5.48  | -3.863138686 | 0        |
| TMEM178   | 1,631  | 6.55   | 1.34  | -4.888059701 | 0        |
| TMEM181   | 5.59   | 2.85   | 1.28  | -2.2265625   | 6.94E-10 |
| TMEM2     | 12,395 | 94.55  | 20.22 | -4.676063304 | 0        |
| TMEM29    | 2,251  | 9.76   | 3.18  | -3.06918239  | 0        |
| TMEM41B   | 1.8    | 8.35   | 3.21  | -2.601246106 | 8.65E-12 |
| TMEM46    | 6,063  | 54.77  | 2.59  | -21.14671815 | 0        |
| TMEM55B   | 2,781  | 35.33  | 12.73 | -2.775333857 | 0        |
| TMEM57    | 3,138  | 24.27  | 7.57  | -3.206076618 | 0        |
| TMEM62    | 2,769  | 7.29   | 1.52  | -4.796052632 | 0        |
| TMEM86A   | 3,582  | 4.47   | 1.60  | -2.79375     | 1.65E-13 |
| TMF1      | 3,282  | 17.37  | 3.75  | -4.632       | 0        |
| TncRNA    | 16,886 | 198.10 | 10.14 | -19.53648915 | 0        |
| TNFAIP2   | 4,175  | 16.30  | 5.75  | -2.834782609 | 0        |
| TNFAIP3   | 4,809  | 85.67  | 20.52 | -4.174951267 | 0        |
| TNFRSF13C | 0.895  | 22.99  | 4.52  | -5.086283186 | 0        |
| TNFRSF21  | 3,634  | 34.63  | 6.12  | -5.658496732 | 0        |
| TNFSF8    | 2,323  | 11.15  | 1.06  | -10.51886792 | 0        |
| TNK2      | 5,287  | 34.43  | 13.36 | -2.577095808 | 0        |
| TNKS2     | 6,156  | 11.85  | 5.72  | -2.071678322 | 0        |
| TOR1AIP2  | 5,052  | 23.56  | 3.85  | -6.119480519 | 0        |
| TP53BP2   | 5,682  | 34.93  | 4.48  | -7.796875    | 0        |
| TP53INP1  | 5,589  | 582.03 | 20.00 | -29.1015     | 0        |
| TP53INP2  | 4,124  | 12.11  | 1.41  | -8.588652482 | 0        |
| TPBG      | 2,376  | 18.66  | 6.81  | -2.740088106 | 0        |
| TPM2      | 2,621  | 40.47  | 17.93 | -2.257110987 | 0        |
| TPO       | 4,638  | 3.99   | 0.29  | -13.75862069 | 0        |
| TPPP      | 5,019  | 2.20   | 0.20  | -11          | 0        |
| TPST1     | 4,878  | 13.25  | 5.28  | -2.509469697 | 0        |
| TRAF6     | 3,004  | 10.70  | 2.95  | -3.627118644 | 0        |
| TRAK2     | 6,462  | 23.81  | 7.62  | -3.124671916 | 0        |
| TRIM13    | 9,415  | 5.34   | 1.43  | -3.734265734 | 0        |
| TRIM23    | 5,439  | 1.62   | 0.28  | -5.785714286 | 3.00E-15 |
| TRIM33    | 8,339  | 10.33  | 3.80  | -2.718421053 | 0        |
| TRIM38    | 3,276  | 36.81  | 17.54 | -2.098631699 | 0        |
| TRIO      | 10,781 | 9.97   | 4.39  | -2.271070615 | 0        |
| TRPC2     | 12,265 | 0.79   | 0.26  | -3.038461538 | 9.15E-10 |

|         |        |         |        |              |          |
|---------|--------|---------|--------|--------------|----------|
| TSC1    | 9,384  | 5.28    | 2.51   | -2.103585657 | 0        |
| TSC22D3 | 3,221  | 1075.56 | 133.09 | -8.081448644 | 0        |
| TSHZ2   | 4,129  | 5.66    | 0.53   | -10.67924528 | 0        |
| TSPAN14 | 5,042  | 219.13  | 55.69  | -3.934817741 | 0        |
| TSPYL2  | 2,802  | 41.88   | 11.96  | -3.501672241 | 0        |
| TSSK3   | 2,093  | 13.71   | 1.79   | -7.659217877 | 0        |
| TTC32   | 1,425  | 11.46   | 3.99   | -2.872180451 | 1.10E-14 |
| TTLL3   | 5,426  | 18.49   | 5.70   | -3.243859649 | 0        |
| TTLL9   | 2,623  | 8.41    | 1.41   | -5.964539007 | 0        |
| TTN     | 111.97 | 0.50    | 0.19   | -2.631578947 | 0        |
| TTY15   | 5,242  | 6.05    | 1.72   | -3.51744186  | 0        |
| TUBA4B  | 20,326 | 0.27    | 0.03   | -9           | 2.70E-12 |
| TXNIP   | 2,704  | 809.13  | 212.15 | -3.813952392 | 0        |
| UACA    | 7,262  | 7.73    | 1.61   | -4.801242236 | 0        |
| UBE2B   | 3,124  | 24.07   | 8.42   | -2.858669834 | 0        |
| UBE2H   | 8,746  | 34.74   | 9.60   | -3.61875     | 0        |
| UBE2W   | 7,706  | 2.38    | 0.84   | -2.833333333 | 0        |
| UBL3    | 4,335  | 22.02   | 5.73   | -3.842931937 | 0        |
| UBQLN1  | 5,546  | 38.78   | 17.67  | -2.194680249 | 0        |
| UBR2    | 5,635  | 8.27    | 3.72   | -2.22311828  | 0        |
| UBXD2   | 4,405  | 33.17   | 16.50  | -2.01030303  | 0        |
| UBXD7   | 7,694  | 13.90   | 4.59   | -3.02832244  | 0        |
| UGCG    | 3,405  | 32.19   | 13.70  | -2.349635036 | 0        |
| ULK1    | 6,774  | 27.00   | 10.72  | -2.518656716 | 0        |
| UNKL    | 1,379  | 5.16    | 1.47   | -3.510204082 | 2.00E-08 |
| UPP1    | 4,517  | 3.99    | 0.62   | -6.435483871 | 0        |
| USP12   | 3.11   | 12.72   | 2.76   | -4.608695652 | 0        |
| USP15   | 5.06   | 21.58   | 6.31   | -3.419968304 | 0        |
| USP16   | 3.73   | 12.83   | 5.07   | -2.530571992 | 0        |
| USP24   | 10,994 | 15.22   | 4.83   | -3.151138716 | 0        |
| USP3    | 3,065  | 20.34   | 4.30   | -4.730232558 | 0        |
| USP31   | 4,059  | 2.95    | 0.43   | -6.860465116 | 0        |
| USP34   | 12,068 | 21.12   | 9.17   | -2.303162486 | 0        |
| USP36   | 8,495  | 38.46   | 7.50   | -5.128       | 0        |
| USP42   | 10,187 | 5.34    | 1.39   | -3.841726619 | 0        |
| USP50   | 1,319  | 4.50    | 0.58   | -7.75862069  | 1.62E-12 |
| USP6NL  | 5,775  | 19.52   | 4.27   | -4.571428571 | 0        |

|         |        |        |       |              |          |
|---------|--------|--------|-------|--------------|----------|
| USPL1   | 3,814  | 16.50  | 2.80  | -5.892857143 | 0        |
| UTP15   | 3,655  | 5.00   | 1.20  | -4.166666667 | 0        |
| UTX     | 5,423  | 9.71   | 2.42  | -4.012396694 | 0        |
| UTY     | 7,197  | 5.74   | 2.21  | -2.597285068 | 0        |
| VCPIP1  | 8,176  | 4.18   | 1.78  | -2.348314607 | 0        |
| VIL2    | 4,043  | 445.96 | 65.27 | -6.83254175  | 0        |
| VPS26A  | 4,408  | 7.86   | 3.80  | -2.068421053 | 0        |
| VPS33B  | 2.49   | 9.50   | 4.33  | -2.193995381 | 1.82E-13 |
| VPS37B  | 4,396  | 58.14  | 25.47 | -2.282685512 | 0        |
| VTI1A   | 1,979  | 6.99   | 1.26  | -5.547619048 | 0        |
| WASL    | 8,844  | 2.62   | 0.42  | -6.238095238 | 0        |
| WBP4    | 2,617  | 7.45   | 3.39  | -2.197640118 | 1.91E-11 |
| WDR20   | 5.47   | 3.85   | 1.56  | -2.467948718 | 1.20E-14 |
| WDR26   | 6,236  | 25.93  | 11.96 | -2.168060201 | 0        |
| WDR37   | 4,611  | 26.46  | 5.12  | -5.16796875  | 0        |
| WDR48   | 3.89   | 16.76  | 7.44  | -2.252688172 | 0        |
| WDR55   | 2,529  | 12.32  | 5.70  | -2.161403509 | 0        |
| WHDC1   | 4,575  | 20.89  | 3.26  | -6.40797546  | 0        |
| WNT9A   | 7,934  | 42.00  | 8.55  | -4.912280702 | 0        |
| WRN     | 5,746  | 3.18   | 1.26  | -2.523809524 | 1.40E-13 |
| WTAP    | 4.63   | 59.27  | 17.39 | -3.408280621 | 0        |
| XAB2    | 3,117  | 47.39  | 22.68 | -2.089506173 | 0        |
| XRN1    | 10,092 | 8.57   | 1.50  | -5.713333333 | 0        |
| YES1    | 4,818  | 10.84  | 0.90  | -12.04444444 | 0        |
| YOD1    | 6,265  | 7.80   | 1.02  | -7.647058824 | 0        |
| YPEL2   | 5,232  | 26.19  | 2.14  | -12.23831776 | 0        |
| YPEL5   | 2,181  | 143.03 | 44.14 | -3.240371545 | 0        |
| YTHDC1  | 8,619  | 31.20  | 15.13 | -2.062128222 | 0        |
| YTHDF3  | 5,093  | 11.98  | 4.95  | -2.42020202  | 0        |
| ZBTB10  | 4,485  | 8.84   | 3.55  | -2.490140845 | 0        |
| ZBTB16  | 6,804  | 24.40  | 0.31  | -78.70967742 | 0        |
| ZBTB39  | 6.17   | 4.35   | 1.73  | -2.514450867 | 0        |
| ZBTB43  | 4,528  | 17.63  | 0.58  | -30.39655172 | 0        |
| ZBTB5   | 4,627  | 4.81   | 1.42  | -3.387323944 | 0        |
| ZBTB6   | 4,305  | 2.58   | 0.68  | -3.794117647 | 4.60E-14 |
| ZBTB8   | 7,333  | 2.71   | 0.23  | -11.7826087  | 0        |
| ZC3H12A | 2,682  | 5.13   | 1.35  | -3.8         | 0        |

|         |        |        |       |              |          |
|---------|--------|--------|-------|--------------|----------|
| ZC3H12D | 3,448  | 28.87  | 8.32  | -3.469951923 | 0        |
| ZC3H7A  | 4,275  | 33.10  | 8.54  | -3.87587822  | 0        |
| ZC3HAV1 | 15,944 | 16.79  | 6.76  | -2.483727811 | 0        |
| ZCCHC14 | 8,031  | 8.56   | 2.95  | -2.901694915 | 0        |
| ZDHHC17 | 5,259  | 9.55   | 4.67  | -2.04496788  | 0        |
| ZDHHC20 | 2,543  | 12.56  | 4.73  | -2.655391121 | 0        |
| ZDHHC23 | 3,778  | 3.04   | 0.62  | -4.903225806 | 0        |
| ZEB1    | 4,148  | 28.67  | 8.88  | -3.228603604 | 0        |
| ZEB2    | 5.78   | 41.86  | 6.80  | -6.155882353 | 0        |
| ZFAND2A | 1,686  | 14.91  | 6.19  | -2.408723748 | 0        |
| ZFAND5  | 5,819  | 65.22  | 22.38 | -2.914209115 | 0        |
| ZFP36L2 | 3.95   | 222.62 | 96.34 | -2.310774341 | 0        |
| ZFP91   | 5,347  | 23.17  | 11.34 | -2.043209877 | 0        |
| ZFY     | 4,556  | 3.32   | 1.42  | -2.338028169 | 3.80E-10 |
| ZFYVE1  | 4,577  | 13.38  | 5.11  | -2.618395303 | 0        |
| ZFYVE20 | 6,678  | 3.26   | 1.57  | -2.076433121 | 2.59E-11 |
| ZHX3    | 9,991  | 20.77  | 1.64  | -12.66463415 | 0        |
| ZIK1    | 2,676  | 8.28   | 3.06  | -2.705882353 | 0        |
| ZMYM2   | 5,217  | 20.03  | 7.22  | -2.774238227 | 0        |
| ZMYM5   | 1,872  | 7.08   | 1.26  | -5.619047619 | 0        |
| ZNF12   | 5,622  | 3.98   | 1.47  | -2.707482993 | 0        |
| ZNF121  | 1,729  | 6.12   | 1.71  | -3.578947368 | 1.28E-12 |
| ZNF134  | 3,538  | 16.25  | 3.52  | -4.616477273 | 0        |
| ZNF136  | 2,971  | 5.66   | 2.30  | -2.460869565 | 5.79E-12 |
| ZNF14   | 2,963  | 2.01   | 0.43  | -4.674418605 | 1.90E-09 |
| ZNF160  | 5,276  | 9.50   | 3.72  | -2.553763441 | 0        |
| ZNF182  | 3,641  | 4.40   | 1.55  | -2.838709677 | 8.50E-14 |
| ZNF192  | 5,362  | 12.05  | 2.04  | -5.906862745 | 0        |
| ZNF195  | 2,287  | 9.34   | 4.49  | -2.080178174 | 4.60E-11 |
| ZNF212  | 5,551  | 4.12   | 1.25  | -3.296       | 0        |
| ZNF236  | 8,124  | 2.68   | 1.22  | -2.196721311 | 1.41E-12 |
| ZNF238  | 5,942  | 12.60  | 2.78  | -4.532374101 | 0        |
| ZNF254  | 2,734  | 9.38   | 1.43  | -6.559440559 | 0        |
| ZNF256  | 2.21   | 13.30  | 2.60  | -5.115384615 | 0        |
| ZNF26   | 3,059  | 8.11   | 3.47  | -2.337175793 | 2.00E-15 |
| ZNF266  | 3,757  | 22.86  | 8.77  | -2.606613455 | 0        |
| ZNF292  | 10,996 | 15.84  | 2.65  | -5.977358491 | 0        |

|        |        |       |       |              |          |
|--------|--------|-------|-------|--------------|----------|
| ZNF295 | 7,368  | 6.96  | 0.32  | -21.75       | 0        |
| ZNF304 | 4,315  | 6.37  | 1.72  | -3.703488372 | 0        |
| ZNF317 | 4,051  | 20.49 | 7.17  | -2.857740586 | 0        |
| ZNF318 | 8,006  | 8.26  | 3.24  | -2.549382716 | 0        |
| ZNF326 | 5,914  | 20.80 | 5.82  | -3.573883162 | 0        |
| ZNF331 | 5,042  | 3.37  | 1.07  | -3.14953271  | 0        |
| ZNF33A | 5,249  | 7.43  | 2.25  | -3.302222222 | 0        |
| ZNF350 | 2,341  | 14.11 | 4.17  | -3.383693046 | 0        |
| ZNF364 | 2,901  | 28.75 | 9.22  | -3.118221258 | 0        |
| ZNF367 | 1,691  | 4.68  | 1.15  | -4.069565217 | 6.34E-11 |
| ZNF394 | 4,768  | 14.90 | 3.26  | -4.570552147 | 0        |
| ZNF395 | 4,802  | 45.86 | 21.86 | -2.0978957   | 0        |
| ZNF403 | 3,207  | 30.57 | 13.43 | -2.276247208 | 0        |
| ZNF408 | 2,441  | 11.47 | 4.45  | -2.57752809  | 0        |
| ZNF417 | 3,597  | 5.31  | 1.57  | -3.382165605 | 0        |
| ZNF425 | 6,701  | 2.96  | 0.65  | -4.553846154 | 0        |
| ZNF426 | 2,318  | 7.13  | 2.25  | -3.168888889 | 0        |
| ZNF430 | 2,649  | 4.26  | 1.30  | -3.276923077 | 1.86E-12 |
| ZNF431 | 3,798  | 3.64  | 1.38  | -2.637681159 | 3.72E-11 |
| ZNF441 | 2,828  | 2.73  | 0.12  | -22.75       | 0        |
| ZNF451 | 5,305  | 8.00  | 3.72  | -2.150537634 | 0        |
| ZNF460 | 3,139  | 2.93  | 0.27  | -10.85185185 | 0        |
| ZNF484 | 3,248  | 3.56  | 0.54  | -6.592592593 | 0        |
| ZNF508 | 5,388  | 35.13 | 6.19  | -5.675282714 | 0        |
| ZNF514 | 3,204  | 3.34  | 1.32  | -2.53030303  | 2.15E-08 |
| ZNF516 | 8,822  | 6.46  | 0.96  | -6.729166667 | 0        |
| ZNF529 | 4,466  | 4.32  | 0.85  | -5.082352941 | 0        |
| ZNF543 | 3,755  | 2.21  | 0.62  | -3.564516129 | 5.26E-10 |
| ZNF548 | 3,381  | 5.04  | 2.14  | -2.355140187 | 1.71E-11 |
| ZNF551 | 3,663  | 6.75  | 1.52  | -4.440789474 | 0        |
| ZNF586 | 2,163  | 17.11 | 6.85  | -2.497810219 | 0        |
| ZNF588 | 11,016 | 3.74  | 1.54  | -2.428571429 | 0        |
| ZNF644 | 5,888  | 5.68  | 1.83  | -3.103825137 | 0        |
| ZNF652 | 7.76   | 17.26 | 3.23  | -5.343653251 | 0        |
| ZNF654 | 2,404  | 7.73  | 2.15  | -3.595348837 | 0        |
| ZNF655 | 23,955 | 3.50  | 0.90  | -3.888888889 | 0        |
| ZNF669 | 1,905  | 8.10  | 2.30  | -3.52173913  | 0        |

|        |       |       |       |              |          |
|--------|-------|-------|-------|--------------|----------|
| ZNF670 | 2,005 | 10.32 | 0.80  | -12.9        | 0        |
| ZNF700 | 2,865 | 9.60  | 2.56  | -3.75        | 0        |
| ZNF704 | 4,844 | 4.82  | 1.84  | -2.619565217 | 0        |
| ZNF706 | 4,958 | 45.26 | 21.98 | -2.059144677 | 0        |
| ZNF709 | 2,154 | 3.90  | 0.66  | -5.909090909 | 5.00E-15 |
| ZNF711 | 4,126 | 6.86  | 3.16  | -2.170886076 | 1.00E-15 |
| ZNF776 | 5,135 | 7.42  | 3.26  | -2.27607362  | 0        |
| ZNF783 | 6,299 | 5.08  | 2.38  | -2.134453782 | 0        |
| ZNF789 | 3,534 | 5.07  | 2.36  | -2.148305085 | 4.25E-10 |
| ZNF791 | 2,474 | 5.68  | 0.95  | -5.978947368 | 0        |
| ZNF8   | 2.21  | 6.44  | 1.75  | -3.68        | 0        |
| ZNF800 | 8,444 | 3.72  | 0.68  | -5.470588235 | 0        |
| ZNF805 | 8,865 | 1.62  | 0.34  | -4.764705882 | 0        |
| ZNF83  | 2,764 | 15.22 | 6.91  | -2.20260492  | 0        |
| ZRANB1 | 3,747 | 25.00 | 6.25  | -4           | 0        |
| ZXDA   | 2,871 | 4.10  | 0.94  | -4.361702128 | 0        |
| ZXDB   | 5,642 | 4.42  | 0.91  | -4.857142857 | 0        |
