# Supplementary material for: Application of the whole-transcriptome shotgun sequencing approach to the study of Philadelphia-positive acute lymphoblastic leukemia
Source: PubMed Central journal article supplement — Blood Cancer J. 2012 Mar 9;2(3):e61–. doi: 10.1038/bcj.2012.6 (PMC3317525; doi:10.1038/bcj.2012.6), 2012-03-09
Supplement: bcj20126x13.pdf [file bcj20126x13.pdf]

## Supplemental Data 4

EX\_p value = Exon 1.0 ST ANOVA p-value

EX\_f.c = Exon 1.0 ST fold change

RNA-Seq\_p value = RNA-Seq Fisher's Exact Test\_raw p-value

RNA-Seq\_f.c = RNA-Seq fold change

EX/RNA-Seq\_c = Exon/RNASeq\_concordance

NA = not differentially expressed in RNA-Seq

| Gene         | EX_p value | EX_f.c   | RNA-Seq_p-value | RNA-Seq_f.c | EX/RNASeq_c |
|--------------|------------|----------|-----------------|-------------|-------------|
| CD209        | 0.00027    | 1.99801  | 0               | 20.93750    | yes         |
| CYFIP2       | 0.00060    | -1.97032 | NA              | NA          | no          |
| SCAMP5       | 0.00062    | 1.91745  | 0               | 8.46875     | yes         |
| SV2B         | 0.00068    | 1.78113  | 3.30E-14        | 2.61194     | yes         |
| ZNF620       | 0.00074    | -1.25142 | NA              | NA          | no          |
| CSF1R        | 0.00077    | 2.93596  | 0               | 3.90023     | yes         |
| ABCC4        | 0.00180    | 2.32322  | 0               | 5.25641     | yes         |
| DNM1         | 0.00201    | 1.52764  | NA              | NA          | no          |
| PDGFD        | 0.00212    | 1.75249  | NA              | NA          | no          |
| ZNF329       | 0.00223    | -1.36559 | NA              | NA          | no          |
| ZNF35        | 0.00232    | -1.71484 | NA              | NA          | no          |
| LOC100132356 | 0.00263    | -2.01058 | NA              | NA          | no          |
| TBX21        | 0.00285    | 1.60352  | 0               | 7.09539     | yes         |
| TPCN1        | 0.00308    | 1.97161  | NA              | NA          | no          |
| CMBL         | 0.00321    | 1.64284  | 0               | 7.30189     | yes         |
| TTC30A       | 0.00403    | -1.50728 | NA              | NA          | no          |
| CORO1B       | 0.00418    | 1.48047  | 0               | 3.23554     | yes         |
| GIPC3        | 0.00418    | 1.53341  | 0               | 9.63636     | yes         |
| LOC100292473 | 0.00427    | -1.34019 | NA              | NA          | no          |
| GIPC1        | 0.00431    | 1.62845  | 0               | 6.32868     | yes         |
| MDFI         | 0.00449    | 1.55233  | 0               | 43.11304    | yes         |
| C18orf21     | 0.00454    | -1.49649 | NA              | NA          | no          |
| LRRC17       | 0.00473    | 1.51527  | 0               | 63.33333    | yes         |
| RUNX3        | 0.00480    | -1.75923 | NA              | NA          | no          |
| THEM4        | 0.00494    | -1.45651 | NA              | NA          | no          |
| PRAME        | 0.00537    | 1.92776  | 0               | 23.54545    | yes         |
| GPX4         | 0.00549    | 1.42733  | 0               | 2.43715     | yes         |
| STXBP1       | 0.00554    | 1.70867  | 0               | 21.94118    | yes         |
| LY6G6C       | 0.00641    | -1.45053 | NA              | NA          | no          |
| KCNE3        | 0.00675    | 1.76849  | NA              | NA          | no          |
| TRIM69       | 0.00681    | -1.22812 | NA              | NA          | no          |
| HIP1R        | 0.00690    | -1.6555  | 0               | -10.39109   | yes         |
| CTSB         | 0.00695    | 2.03314  | 0               | 2.54072     | yes         |
| GTF2A1       | 0.00719    | 1.49205  | 2.93E-10        | 4.48193     | yes         |
| P2RX5        | 0.00754    | -2.7498  | 0               | -7.52439    | yes         |
| RLN2         | 0.00759    | -1.36554 | NA              | NA          | no          |
| SNIP1        | 0.00783    | -1.26403 | 0               | -5.61278    | yes         |
| PDIA4        | 0.00787    | 1.35418  | 0               | 7.39386     | yes         |
| CTRL         | 0.00800    | -1.52121 | 0               | -10.53846   | yes         |
| OLFML2A      | 0.00807    | 1.99741  | 0               | 7.22774     | yes         |

|           |         |          |          |           |     |
|-----------|---------|----------|----------|-----------|-----|
| CYB5A     | 0.00823 | 1.88602  | 0        | 12.80769  | yes |
| SEMA4D    | 0.00831 | -1.50798 | NA       | NA        | no  |
| PRDM2     | 0.00831 | -1.50353 | 0        | -8.66268  | yes |
| FCRL3     | 0.00835 | -1.50586 | NA       | NA        | no  |
| TMEM185A  | 0.00869 | -1.67334 | NA       | NA        | no  |
| NHEDC1    | 0.00883 | -1.44697 | NA       | NA        | no  |
| BTG3      | 0.00884 | -2.32682 | 0        | -12.28395 | yes |
| NIPAL2    | 0.00888 | 1.81947  | NA       | NA        | no  |
| NUDT13    | 0.00901 | -1.366   | NA       | NA        | no  |
| EPHB3     | 0.00903 | 1.47241  | 0        | 5.17857   | yes |
| GZMK      | 0.00941 | -2.77611 | NA       | NA        | no  |
| ZBTB49    | 0.01004 | -1.26387 | NA       | NA        | no  |
| FAM50B    | 0.01006 | 1.40095  | 0        | 5.27857   | yes |
| GPRC5D    | 0.01016 | -1.43809 | NA       | NA        | no  |
| TRIM39    | 0.01018 | -1.37255 | NA       | NA        | no  |
| PCDHGC5   | 0.01031 | 1.50809  | 0        | 5.41176   | yes |
| C20orf12  | 0.01041 | -1.1947  | NA       | NA        | no  |
| PRPSAP2   | 0.01042 | 1.4289   | 1.00E-15 | 3.65327   | yes |
| APAF1     | 0.01099 | 1.90988  | 0        | 2.98726   | yes |
| ZUFSP     | 0.01107 | -1.18119 | NA       | NA        | no  |
| HAAO      | 0.01110 | 1.37113  | NA       | NA        | no  |
| FPGT      | 0.01122 | 1.4544   | NA       | NA        | no  |
| MCART1    | 0.01124 | 1.64506  | 1.61E-11 | 9.04651   | yes |
| IQCG      | 0.01125 | -1.21268 | 0        | 7.18033   | no  |
| MMP17     | 0.01148 | 1.62203  | 0        | 8.47363   | yes |
| RBPMS     | 0.01175 | 1.63966  | 0        | 6.35294   | yes |
| RPL27A    | 0.01183 | -1.39897 | NA       | NA        | no  |
| PTGER4    | 0.01205 | -2.39551 | 6.68E-12 | -6.96000  | yes |
| ATP2A3    | 0.01216 | -1.59325 | NA       | NA        | no  |
| PYCR2     | 0.01229 | 1.44135  | 0        | 5.06586   | yes |
| KCNA3     | 0.01282 | -2.47069 | NA       | NA        | no  |
| TBCC      | 0.01284 | -1.36359 | NA       | NA        | no  |
| CASP1     | 0.01284 | 2.02596  | 0        | 2.92134   | yes |
| SERPINH1  | 0.01290 | 1.45792  | 0        | 21.56696  | yes |
| SORBS1    | 0.01296 | 1.56283  | NA       | NA        | no  |
| ZNF132    | 0.01297 | -1.33538 | NA       | NA        | no  |
| RNASE1    | 0.01299 | 1.92419  | 0        | 35.60000  | yes |
| EFNA4     | 0.01302 | 1.36165  | NA       | NA        | no  |
| C16orf54  | 0.01307 | -1.399   | NA       | NA        | no  |
| MRPL33    | 0.01322 | 1.56749  | NA       | NA        | no  |
| COL6A3    | 0.01344 | 2.27229  | 0        | 6.16373   | yes |
| E2F5      | 0.01350 | -1.51909 | NA       | NA        | no  |
| PHEX      | 0.01356 | 1.5777   | 0        | 12.35000  | yes |
| HIST1H2BN | 0.01380 | -1.41627 | NA       | NA        | no  |
| SPARC     | 0.01390 | 2.06281  | 0        | 2.87043   | yes |
| KDM6B     | 0.01413 | -1.73175 | NA       | NA        | no  |
| MFI2      | 0.01436 | 1.41724  | 0        | 4.33333   | yes |
| NUAK2     | 0.01436 | -1.50617 | 0        | -21.85714 | yes |
| OR2AT4    | 0.01438 | -1.35369 | NA       | NA        | no  |
| UNC93B1   | 0.01443 | 1.43354  | 0        | 3.81319   | yes |

|           |         |          |          |          |     |
|-----------|---------|----------|----------|----------|-----|
| FMNL1     | 0.01488 | -1.47103 | NA       | NA       | no  |
| BTBD8     | 0.01492 | 1.2099   | NA       | NA       | no  |
| ATP5B     | 0.01544 | 1.31805  | 0        | 2.56890  | yes |
| MACC1     | 0.01547 | -1.47298 | NA       | NA       | no  |
| METTL7B   | 0.01548 | 1.43538  | NA       | NA       | no  |
| HPSE      | 0.01578 | 1.37033  | NA       | NA       | no  |
| PLVAP     | 0.01583 | 2.93746  | 0        | 21.55171 | yes |
| HIST1H2AG | 0.01595 | -1.59819 | NA       | NA       | no  |
| TSPYL5    | 0.01596 | -1.86454 | NA       | NA       | no  |
| CPVL      | 0.01613 | 2.04302  | 0        | 3.56463  | yes |
| PSMB5     | 0.01637 | 1.42119  | 0        | 3.50370  | yes |
| ZNF471    | 0.01638 | -1.36111 | NA       | NA       | no  |
| C7orf13   | 0.01650 | -1.58708 | NA       | NA       | no  |
| ARL4C     | 0.01668 | -1.72944 | 4.41E-09 | -2.93750 | yes |
| MRPL17    | 0.01677 | 1.30938  | 0        | 11.78906 | yes |
| DAB2      | 0.01680 | 1.96009  | 0        | 4.20833  | yes |
| IRF8      | 0.01689 | 2.54514  | 0        | 2.84675  | yes |
| HIST1H4L  | 0.01697 | -1.72412 | NA       | NA       | no  |
| CRYL1     | 0.01717 | 1.47245  | 0        | 3.44764  | yes |
| MRPL43    | 0.01722 | 1.27964  | 0        | 2.69022  | yes |
| CCR7      | 0.01744 | -1.88207 | 1.00E-15 | -3.40206 | yes |
| METTL7A   | 0.01793 | 1.64702  | 0        | 4.04307  | yes |
| KIAA0182  | 0.01837 | -1.41285 | 0        | -4.48756 | yes |
| KRTAP6-3  | 0.01838 | -1.66011 | NA       | NA       | no  |
| RWDD1     | 0.01845 | -1.30584 | NA       | NA       | no  |
| C18orf45  | 0.01851 | 1.4446   | 4.10E-14 | 4.70000  | yes |
| CMTM2     | 0.01898 | 1.94524  | 0        | 25.03797 | yes |
| SEL1L3    | 0.01919 | 3.13407  | NA       | NA       | no  |
| C15orf17  | 0.01920 | 1.2806   | 0        | 4.75684  | yes |
| XKR6      | 0.01922 | -1.62209 | NA       | NA       | no  |
| ZNF461    | 0.01932 | -1.4666  | NA       | NA       | no  |
| APLP2     | 0.01952 | 2.03788  | 0        | 4.22469  | yes |
| NEGR1     | 0.01963 | 3.10934  | 0        | 5.47912  | yes |
| GATC      | 0.01993 | 1.19299  | NA       | NA       | no  |
| PEA15     | 0.01994 | 1.26603  | 0        | 5.14252  | yes |
| SLC39A14  | 0.02009 | 1.57522  | 0        | 29.03846 | yes |
| ATXN7L1   | 0.02014 | -1.23217 | NA       | NA       | no  |
| PRPS2     | 0.02025 | -1.57571 | 2.09E-12 | 3.96739  | no  |
| RNASE6    | 0.02027 | 2.1943   | 0        | 24.77099 | yes |
| SPATA2    | 0.02029 | -1.36382 | 3.09E-12 | -2.06993 | yes |
| OBSL1     | 0.02044 | 2.11477  | NA       | NA       | no  |
| DNHD1     | 0.02046 | -1.29499 | 1.81E-09 | -2.72650 | yes |
| GAPT      | 0.02047 | -2.05803 | NA       | NA       | no  |
| SCN1B     | 0.02069 | 1.57417  | 0        | 17.24333 | yes |
| ITIH4     | 0.02070 | -1.24921 | 0        | -4.62385 | yes |
| TRIM2     | 0.02095 | 1.47342  | 1.17E-13 | 3.61224  | yes |
| MAGI3     | 0.02097 | 1.55612  | 2.47E-10 | 2.54348  | yes |
| EIF4E3    | 0.02109 | -1.72125 | NA       | NA       | no  |
| ZNF498    | 0.02115 | -1.15885 | NA       | NA       | no  |
| LDB3      | 0.02126 | 1.69801  | 0        | 2.91899  | yes |

|           |         |          |          |           |     |
|-----------|---------|----------|----------|-----------|-----|
| NDRG2     | 0.02127 | 1.79529  | 0        | 4.49735   | yes |
| HIST1H2BO | 0.02131 | -1.44011 | NA       | NA        | no  |
| FBXO8     | 0.02136 | -1.36281 | 5.07E-09 | -2.36406  | yes |
| PPP1R13B  | 0.02145 | 1.58959  | 0        | 7.96341   | yes |
| ZNF467    | 0.02148 | 1.33543  | NA       | NA        | no  |
| YES1      | 0.02154 | -1.48884 | 0        | -12.04444 | yes |
| CHRNA1    | 0.02155 | -1.34757 | NA       | NA        | no  |
| DEAF1     | 0.02174 | 1.37671  | 0        | 3.28253   | yes |
| TMEM92    | 0.02175 | 1.45045  | 0        | 8.43636   | yes |
| PLEKHF1   | 0.02180 | -1.41046 | NA       | NA        | no  |
| FUCA1     | 0.02185 | 1.99936  | 0        | 6.25916   | yes |
| PCDH12    | 0.02200 | 1.74773  | 0        | 51.60000  | yes |
| CRTAM     | 0.02225 | -1.30832 | NA       | NA        | no  |
| DYNLL1    | 0.02236 | 2.19352  | 0        | 30.13947  | yes |
| HINFP     | 0.02246 | 1.339    | NA       | NA        | no  |
| PTGR1     | 0.02269 | 2.17122  | NA       | NA        | no  |
| TAF11     | 0.02288 | -1.35169 | 0        | -2.77825  | yes |
| KANK1     | 0.02295 | 1.49615  | NA       | NA        | no  |
| RTN2      | 0.02299 | 1.29558  | 2.00E-14 | 6.23684   | yes |
| VANGL1    | 0.02310 | 1.60011  | 0        | 21.16667  | yes |
| F2RL2     | 0.02365 | 1.54455  | NA       | NA        | no  |
| BLCAP     | 0.02378 | 1.20506  | NA       | NA        | no  |
| NSF       | 0.02392 | 1.40169  | NA       | NA        | no  |
| RLN3      | 0.02426 | -1.56976 | NA       | NA        | no  |
| FZD2      | 0.02463 | 1.35606  | 0        | 30.60000  | yes |
| RANBP3L   | 0.02486 | 2.34974  | NA       | NA        | no  |
| GSTA1     | 0.02510 | -1.3538  | NA       | NA        | no  |
| ZSCAN16   | 0.02515 | -1.30581 | NA       | NA        | no  |
| KLHL11    | 0.02534 | -1.45826 | NA       | NA        | no  |
| DNAJB6    | 0.02535 | 1.63052  | NA       | NA        | no  |
| ZNF14     | 0.02552 | -1.52445 | 1.90E-09 | -4.67442  | yes |
| RAB34     | 0.02592 | 1.31415  | NA       | NA        | no  |
| ZNF764    | 0.02594 | -1.20836 | NA       | NA        | no  |
| SPINT2    | 0.02599 | 1.31396  | 0        | 2.14572   | yes |
| FSHB      | 0.02621 | -1.3529  | NA       | NA        | no  |
| CHN2      | 0.02650 | 1.87821  | NA       | NA        | no  |
| MLANA     | 0.02653 | -1.29032 | NA       | NA        | no  |
| COPZ1     | 0.02662 | 1.54038  | 0        | 3.52859   | yes |
| SERPING1  | 0.02683 | 1.56953  | 0        | 5.33210   | yes |
| SH3GL1P1  | 0.02687 | -1.53394 | NA       | NA        | no  |
| PEG10     | 0.02709 | -3.24219 | 0        | -11.87000 | yes |
| NAGA      | 0.02715 | 1.57401  | 0        | 6.06070   | yes |
| ATP5L2    | 0.02741 | -1.33198 | NA       | NA        | no  |
| CDRT4     | 0.02770 | -1.31985 | NA       | NA        | no  |
| LOC90925  | 0.02770 | -1.76347 | NA       | NA        | no  |
| EHHADH    | 0.02778 | 1.27218  | NA       | NA        | no  |
| PSG4      | 0.02782 | -1.30478 | NA       | NA        | no  |
| HIST1H2AJ | 0.02789 | -1.98944 | NA       | NA        | no  |
| GAS6      | 0.02815 | 1.44724  | 0        | 3.71092   | yes |
| KCND1     | 0.02819 | -1.26546 | NA       | NA        | no  |

|           |         |          |          |           |     |
|-----------|---------|----------|----------|-----------|-----|
| RDH11     | 0.02826 | 1.30784  | 0        | 6.60177   | yes |
| ATP6V0E1  | 0.02827 | 1.50151  | 0        | 5.14773   | yes |
| UNC45A    | 0.02835 | 1.24123  | 0        | 5.88148   | yes |
| CPS1      | 0.02840 | 1.37181  | NA       | NA        | no  |
| PLEKHB1   | 0.02854 | -1.2689  | NA       | NA        | no  |
| ACTN4     | 0.02863 | 1.39318  | 0        | 3.43169   | yes |
| IL12RB2   | 0.02868 | -1.36307 | NA       | NA        | no  |
| CASZ1     | 0.02876 | -1.28267 | 0        | -4.00714  | yes |
| ZNF540    | 0.02936 | -1.20407 | NA       | NA        | no  |
| SLC2A9    | 0.02937 | 1.77542  | 0        | 9.51744   | yes |
| PRKCQ     | 0.02938 | -1.62076 | NA       | NA        | no  |
| DENND1C   | 0.02950 | -1.43972 | NA       | NA        | no  |
| CLPX      | 0.02951 | 1.37681  | NA       | NA        | no  |
| VAMP5     | 0.02974 | 1.5498   | 0        | 2.52382   | yes |
| RELL1     | 0.02976 | -1.52843 | NA       | NA        | no  |
| AKT3      | 0.03011 | -2.16213 | NA       | NA        | no  |
| MARCH9    | 0.03012 | -1.28761 | NA       | NA        | no  |
| LSM11     | 0.03016 | -1.25678 | NA       | NA        | no  |
| MUSTN1    | 0.03029 | -1.28679 | 0        | -2.79294  | yes |
| RARG      | 0.03033 | 1.28053  | 0        | 3.09778   | yes |
| C13orf1   | 0.03061 | 1.37209  | 0        | 12.53846  | yes |
| PELI2     | 0.03064 | -1.58427 | 0        | -2.59000  | yes |
| PHF1      | 0.03078 | -1.48787 | NA       | NA        | no  |
| PERP      | 0.03080 | -1.28847 | NA       | NA        | no  |
| ARF3      | 0.03102 | 1.27154  | 0        | 4.31836   | yes |
| ZNF18     | 0.03115 | -1.27385 | NA       | NA        | no  |
| SEPT1     | 0.03133 | -1.87014 | NA       | NA        | no  |
| LDOC1L    | 0.03148 | -1.3726  | NA       | NA        | no  |
| TNFAIP8L2 | 0.03159 | 1.52598  | 0        | 8.71233   | yes |
| RNF14     | 0.03160 | 1.77706  | 0        | 3.40110   | yes |
| HAS2      | 0.03172 | -1.30288 | NA       | NA        | no  |
| KCTD5     | 0.03184 | 1.30239  | 0        | 4.44490   | yes |
| MAML1     | 0.03235 | -1.11605 | NA       | NA        | no  |
| STYX      | 0.03250 | 1.40679  | NA       | NA        | no  |
| PLD4      | 0.03251 | 1.54882  | 0        | 7.89655   | yes |
| OR2A14    | 0.03254 | -1.48016 | NA       | NA        | no  |
| HIC2      | 0.03282 | -1.33053 | 0        | -2.19742  | yes |
| NOL12     | 0.03290 | 1.18135  | 0        | 2.72464   | yes |
| TSC22D2   | 0.03294 | -1.3229  | NA       | NA        | no  |
| PRR14     | 0.03313 | -1.23789 | NA       | NA        | no  |
| ZNF530    | 0.03325 | -1.27969 | NA       | NA        | no  |
| HIST4H4   | 0.03325 | -1.49256 | NA       | NA        | no  |
| WFDC10A   | 0.03338 | -1.40393 | NA       | NA        | no  |
| KCTD6     | 0.03353 | -1.32043 | NA       | NA        | no  |
| C17orf68  | 0.03354 | -1.47097 | NA       | NA        | no  |
| ORMDL3    | 0.03357 | 1.3045   | NA       | NA        | no  |
| ZNF800    | 0.03377 | -1.40935 | 0        | -5.47059  | yes |
| LOC646470 | 0.03397 | -1.34828 | 7.00E-15 | -20.79412 | yes |
| MRPL2     | 0.03410 | 1.2214   | 0        | 2.23273   | yes |
| PRM1      | 0.03420 | -1.29114 | NA       | NA        | no  |

|           |         |          |          |           |     |
|-----------|---------|----------|----------|-----------|-----|
| C12orf52  | 0.03426 | 1.24268  | 0        | 9.11640   | yes |
| SCML4     | 0.03434 | -1.37642 | NA       | NA        | no  |
| LAMP3     | 0.03435 | -1.24906 | NA       | NA        | no  |
| FGF6      | 0.03445 | 1.96151  | 0        | 10.12500  | yes |
| EHD4      | 0.03449 | 1.66593  | 0        | 11.75581  | yes |
| MRPL53    | 0.03455 | 1.23246  | NA       | NA        | no  |
| CDK11A    | 0.03478 | -1.38303 | NA       | NA        | no  |
| SDC2      | 0.03479 | 2.10929  | NA       | NA        | no  |
| USP49     | 0.03491 | -1.1668  | NA       | NA        | no  |
| PHF7      | 0.03498 | -1.17123 | NA       | NA        | no  |
| ZNF335    | 0.03518 | -1.26417 | NA       | NA        | no  |
| ADAM28    | 0.03527 | -1.48368 | NA       | NA        | no  |
| CYB561D2  | 0.03534 | -1.21147 | 8.59E-11 | 2.84746   | no  |
| LRRC55    | 0.03539 | -1.36276 | NA       | NA        | no  |
| CARNS1    | 0.03551 | -1.30885 | NA       | NA        | no  |
| PRKCA     | 0.03589 | 1.85402  | 0        | 6.45015   | yes |
| C11orf80  | 0.03594 | -1.34595 | NA       | NA        | no  |
| CUL4A     | 0.03610 | 1.52916  | NA       | NA        | no  |
| HIST1H2AM | 0.03610 | -1.68338 | NA       | NA        | no  |
| C16orf72  | 0.03632 | -1.30094 | 0        | -5.78389  | yes |
| DDB1      | 0.03671 | 1.37658  | NA       | NA        | no  |
| NMNAT1    | 0.03675 | 1.17981  | 0        | 12.31250  | yes |
| ETNK1     | 0.03680 | 1.451    | NA       | NA        | no  |
| C16orf58  | 0.03691 | 1.20776  | 0        | 2.48320   | yes |
| REG1B     | 0.03692 | -1.36018 | NA       | NA        | no  |
| SMPDL3B   | 0.03694 | -1.32883 | NA       | NA        | no  |
| PRKX      | 0.03707 | -1.59718 | 0        | -14.29940 | yes |
| RASAL2    | 0.03708 | 1.80611  | 0        | -3.34167  | no  |
| MGAT4A    | 0.03717 | 2.07943  | NA       | NA        | no  |
| ISCU      | 0.03720 | 1.52255  | 0        | 2.23909   | yes |
| GMEB2     | 0.03721 | -1.20723 | 0        | -5.35714  | yes |
| SLC18A1   | 0.03742 | -1.42223 | NA       | NA        | no  |
| ACTR10    | 0.03762 | 1.31428  | NA       | NA        | no  |
| RPL10L    | 0.03770 | 1.19473  | NA       | NA        | no  |
| TFPT      | 0.03771 | 1.1699   | 0        | 3.43919   | yes |
| RNASE9    | 0.03781 | -1.38266 | NA       | NA        | no  |
| COLO      | 0.03782 | 1.70016  | NA       | NA        | no  |
| NAIF1     | 0.03793 | -1.3231  | NA       | NA        | no  |
| CMTM7     | 0.03810 | -1.54449 | NA       | NA        | no  |
| RCBTB2    | 0.03811 | 1.93081  | NA       | NA        | no  |
| ZNF295    | 0.03814 | -1.65638 | 0        | -21.75000 | yes |
| OPN5      | 0.03822 | -1.26597 | NA       | NA        | no  |
| GHITM     | 0.03853 | 1.48228  | NA       | NA        | no  |
| RAB33B    | 0.03859 | -1.51995 | NA       | NA        | no  |
| C1orf52   | 0.03926 | -1.2712  | 8.14E-12 | -2.16960  | yes |
| ZSCAN18   | 0.03978 | -1.33437 | NA       | NA        | no  |
| HDAC4     | 0.04020 | -1.25461 | NA       | NA        | no  |
| ZNF574    | 0.04059 | -1.3616  | NA       | NA        | no  |
| TGFBR3    | 0.04071 | -1.61926 | NA       | NA        | no  |
| ACCN3     | 0.04105 | -1.39483 | NA       | NA        | no  |

|          |         |          |          |           |     |
|----------|---------|----------|----------|-----------|-----|
| PCYOX1   | 0.04108 | 1.33315  | 0        | 5.34921   | yes |
| WASL     | 0.04124 | -1.26737 | 0        | -6.23810  | yes |
| RAB30    | 0.04137 | -1.83421 | 0        | -11.17568 | yes |
| CENPT    | 0.04141 | -1.22208 | NA       | NA        | no  |
| RASL11A  | 0.04145 | -1.35531 | NA       | NA        | no  |
| RASIP1   | 0.04153 | 1.421    | 0        | 54.66667  | yes |
| ACO2     | 0.04153 | 1.25582  | 0        | 2.74534   | yes |
| SLC24A1  | 0.04162 | 1.25543  | 0        | 3.62162   | yes |
| PREB     | 0.04167 | 1.25501  | 0        | 8.80567   | yes |
| OR1F1    | 0.04178 | -1.39796 | NA       | NA        | no  |
| CCL11    | 0.04218 | -1.32611 | NA       | NA        | no  |
| C20orf27 | 0.04229 | 1.346    | 0        | 7.11902   | yes |
| ZAK      | 0.04231 | 1.37924  | NA       | NA        | no  |
| MIB1     | 0.04233 | 1.45197  | NA       | NA        | no  |
| SPRR2A   | 0.04233 | -1.37374 | NA       | NA        | no  |
| PPIC     | 0.04255 | 2.03061  | NA       | NA        | no  |
| COQ6     | 0.04256 | 1.18839  | NA       | NA        | no  |
| CNIH2    | 0.04273 | -1.27375 | NA       | NA        | no  |
| NARS     | 0.04286 | 1.46005  | NA       | NA        | no  |
| KLHL9    | 0.04298 | -1.52872 | NA       | NA        | no  |
| C2orf47  | 0.04302 | -1.28744 | NA       | NA        | no  |
| CREB3L4  | 0.04307 | 1.27998  | 0        | 5.23404   | yes |
| SLN      | 0.04336 | -1.33504 | NA       | NA        | no  |
| CTNNA1   | 0.04354 | 1.59722  | 0        | 2.00927   | yes |
| AIM2     | 0.04354 | -1.26398 | NA       | NA        | no  |
| HIST1H4F | 0.04387 | -1.54851 | NA       | NA        | no  |
| BCAS3    | 0.04391 | 1.28206  | 0        | 4.32692   | yes |
| ANKRD36B | 0.04424 | -2.11108 | NA       | NA        | no  |
| ZXDA     | 0.04432 | -1.49333 | 0        | -4.36170  | yes |
| PTGS1    | 0.04436 | 1.60358  | 1.72E-09 | 2.75000   | yes |
