# Supplementary figures and images for: Application of the whole-transcriptome shotgun sequencing approach to the study of Philadelphia-positive acute lymphoblastic leukemia
Source: PubMed Central journal article supplement — Blood Cancer J. 2012 Mar 9;2(3):e61–. doi: 10.1038/bcj.2012.6 (PMC3317525; doi:10.1038/bcj.2012.6), 2012-03-09

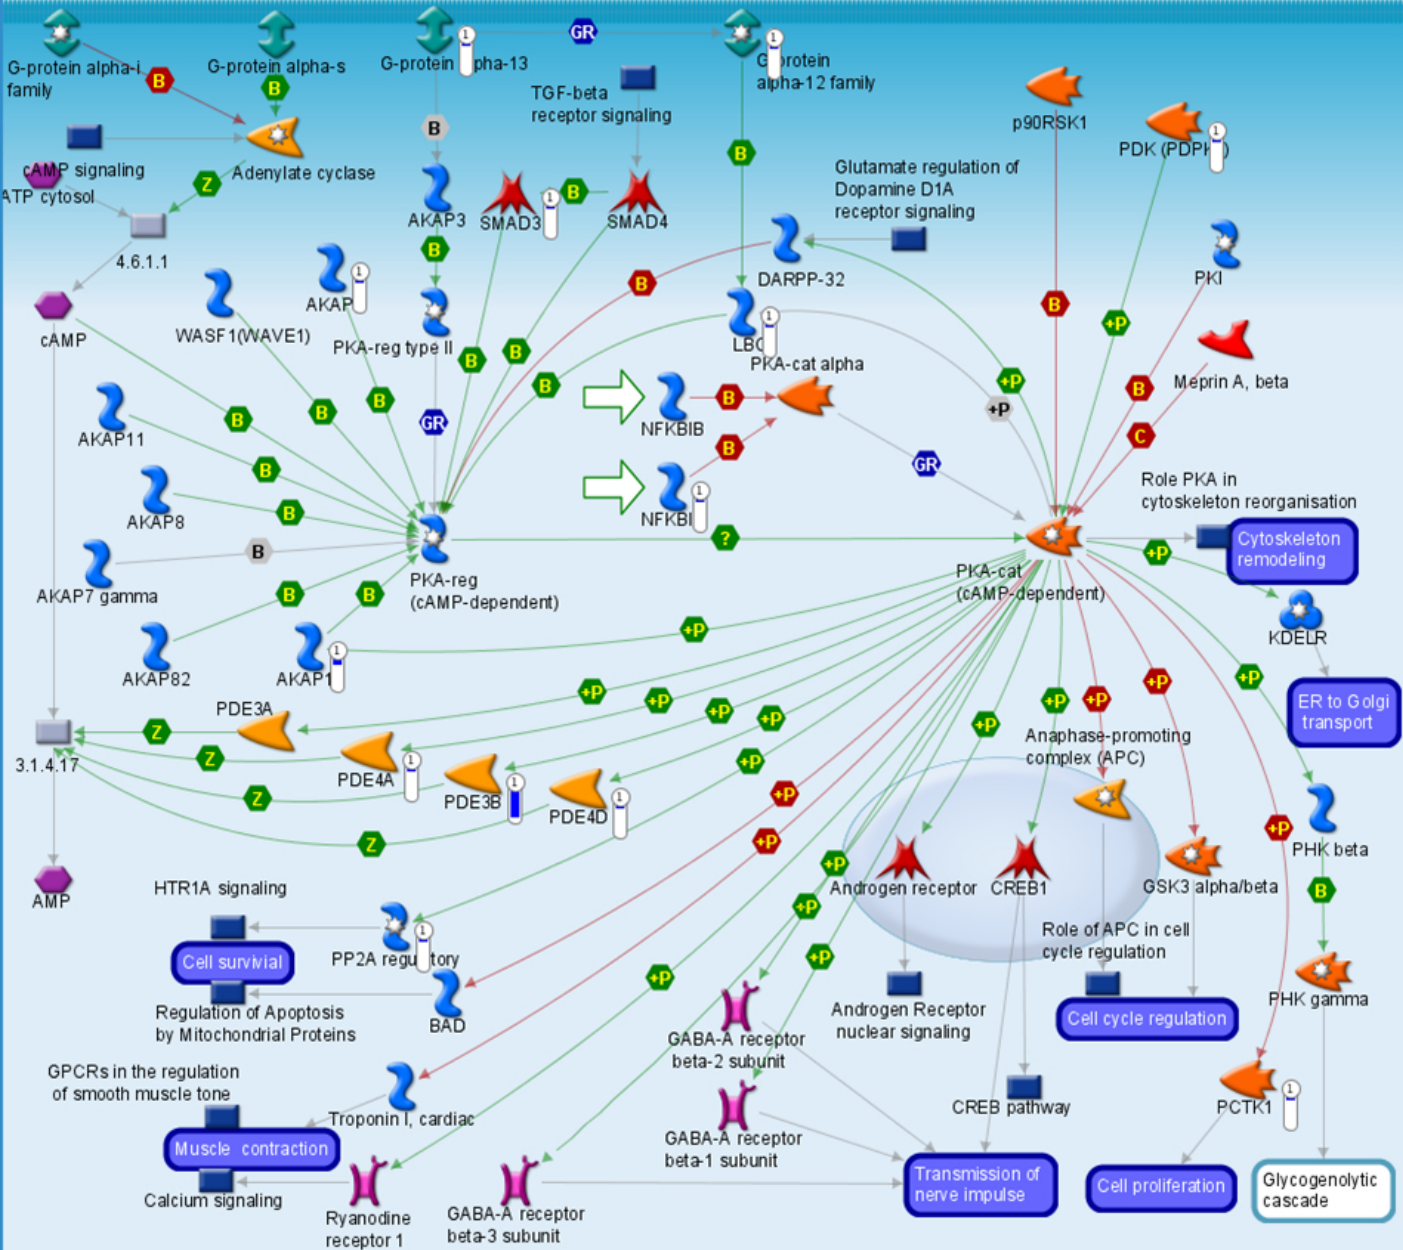

Supplement: bcj20126x5.pdf [file bcj20126x5.pdf]

### SURVIVIN

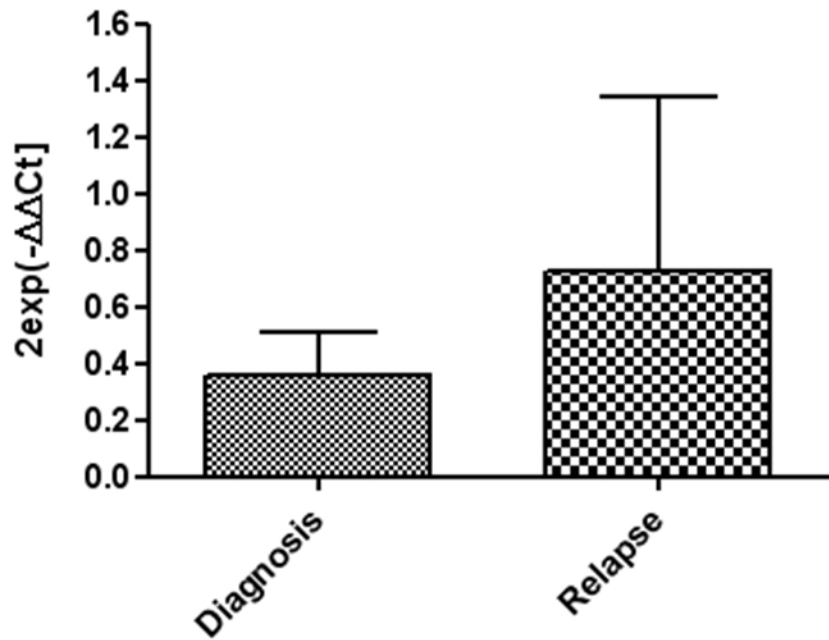

### AURORA B

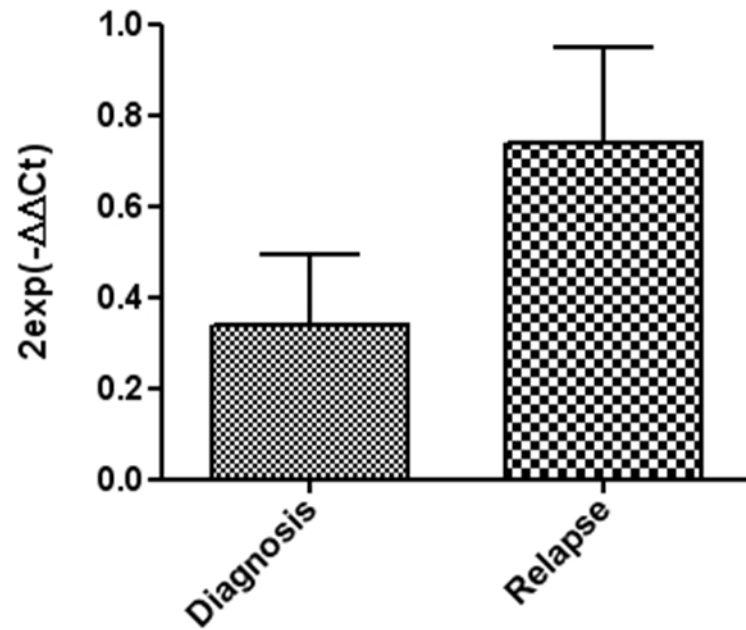

Supplement: bcj20126x6.pdf [file bcj20126x6.pdf]
